# Supplementary material for: Transcriptional signature associated with early rheumatoid arthritis and healthy individuals at high risk to develop the disease
Source: PubMed Central journal article supplement (PMC5870959; doi:10.1371/journal.pone.0194205), 2018-03-27
Supplement: pone.0194205.s001.pdf [file pone.0194205.s001.pdf]

**Supplementary Table 1.** Oligonucleotide sequences of the sense and antisense primers for real-time PCR Analysis

| <b>Gene</b>     | <b>Accession number</b> | <b>Forward Primer Sequence</b> | <b>Reverse Primer Sequence</b> | <b>Product Size</b> |
|-----------------|-------------------------|--------------------------------|--------------------------------|---------------------|
| <i>BCL2</i>     | NM_000633               | gcacctgcacacctggat             | agggccaaactgagcaga             | 126                 |
| <i>SERPINB9</i> | BC002538                | agataacccttcgcacaacg           | cccgatgaatgtcttctct            | 143                 |
| <i>SERPING1</i> | NM_000062               | gaccctggggactctctac            | tcagcggactccaaactct            | 69                  |
| <i>SNCA</i>     | NM_000345               | gagtggccattcgacgac             | ccctgttggtttctcagc             | 119                 |
| <i>CX3CL1</i>   | NM_002996.3             | ccaccctgaaaggctct              | gtgggagtgggtccaatg             | 64                  |
| <i>MS4A1</i>    | NM_152866.2             | agaacaaaatctctactttgatggaac    | ggcaaggcctactgctga             | 96                  |
| <i>ETS1</i>     | NM_001143820.1          | ctgcaggctgttgaagatg            | gggaggaccagtcgtgta             | 120                 |
| <i>EGR1</i>     | NM_001964.2             | ggtttgctgggtaactg              | agccctacgagcacctgac            | 92                  |
| <i>MEF2A</i>    | NM_005587.2             | tgatgcggaatcataaaatcg          | tggaactgtgacagacattgaa         | 68                  |
| <i>SOSTDC1</i>  | NM_015464.2             | gattttgtaggtgcgtgtgct          | gattggaggaggctatggaac          | 133                 |
| <i>WIF1</i>     | NM_007191.4             | gctgatttcacactgctctcc          | gacaaagcaactgctcaacc           | 105                 |
| <i>MXA</i>      | NM_002462.3             | atccagccaccattccaa             | caacaagttaaatggatcacagagc      | 61                  |
| <i>IFI6</i>     | NM_002038.3             | tgcttcttctctctcccaa            | gctctccgagcactttttctt          | 147                 |
