# Supplementary material for: Transcriptional signature associated with early rheumatoid arthritis and healthy individuals at high risk to develop the disease
Source: PubMed Central journal article supplement (PMC5870959; doi:10.1371/journal.pone.0194205), 2018-03-27
Supplement: pone.0194205.s002.pdf [file pone.0194205.s002.pdf]

**Supplementary Table 2. Up regulated genes in patients with RA vs relatives ACCP-**

| Gene Symbol | Genbank Accession | Gene Name                                                       | Fold Change | Regulation |
|-------------|-------------------|-----------------------------------------------------------------|-------------|------------|
| IRF2BP2     | NM_182972         | interferon regulatory factor 2 binding protein 2                | 2.2283545   | up         |
| DNM3        | NM_015569         | dynamamin 3                                                     | 2.179819    | up         |
| WDR93       | NM_020212         | WD repeat domain 93                                             | 2.9332693   | up         |
| CAST        | NM_001042440      | calpastatin                                                     | 2.0139737   | up         |
| DHRS7       | NM_016029         | dehydrogenase/reductase (SDR family) member 7                   | 2.0166013   | up         |
| LOC644366   | XM_932149         | uncharacterized LOC644366                                       | 2.5573158   | up         |
| SUMO1       | NM_003352         | SMT3 suppressor of mif two 3 homolog 1 ( <i>S. cerevisiae</i> ) | 2.1390934   | up         |
| FAM55C      | NM_001134456      | family with sequence similarity 55, member C                    | 2.027618    | up         |
|             |                   |                                                                 | 2.0528383   | up         |
| SNCA        | NM_007308         | synuclein, alpha (non A4 component of amyloid precursor)        | 3.070638    | up         |
| ETV4        | NM_001079675      | ets variant 4                                                   | 2.078938    | up         |
|             | DB073168          |                                                                 | 2.5304694   | up         |
| DDX24       | NM_020414         | DEAD (Asp-Glu-Ala-Asp) box polypeptide 24                       | 2.1985526   | up         |
| BCL2        | NM_000633         | B-cell CLL/lymphoma 2                                           | 2.48382     | up         |
| TMF1        | NM_007114         | TATA element modulatory factor 1                                | 2.0867357   | up         |
| OC90        | NM_001080399      | otoconin 90                                                     | 2.187347    | up         |
| MORC3       | NM_015358         | MORC family CW-type zinc finger 3                               | 2.0230103   | up         |
| AFTPH       | NM_203437         | aftiphilin                                                      | 2.162457    | up         |
| SRPK3       | NM_014370         | SRSF protein kinase 3                                           | 2.1222854   | up         |
| FAM101B     | NM_182705         | family with sequence similarity 101, member B                   | 2.2707503   | up         |
| LYRM2       | NM_020466         | LYR motif containing 2                                          | 2.2003713   | up         |
|             | XM_003119905      |                                                                 | 2.442962    | up         |
| MRTO4       | NM_016183         | mRNA turnover 4 homolog ( <i>S. cerevisiae</i> )                | 2.3046987   | up         |
| TNS1        | NM_022648         | tensin 1                                                        | 2.028129    | up         |
| XK          | NM_021083         | X-linked Kx blood group (McLeod syndrome)                       | 4.1446037   | up         |
| ACTR3       | NM_005721         | ARP3 actin-related protein 3 homolog (yeast)                    | 2.036796    | up         |
| LOC654433   | NR_015377         | uncharacterized LOC654433                                       | 2.5371802   | up         |
| DMXL1       | NM_005509         | Dmx-like 1                                                      | 2.0011044   | up         |
| C6orf105    | NM_032744         | chromosome 6 open reading frame 105                             | 2.0007164   | up         |
| CTNNB1      | NM_001904         | catenin (cadherin-associated protein), beta 1, 88kDa            | 2.138463    | up         |
| VNN1        | NM_004666         | vanin 1                                                         | 2.690406    | up         |
| SPRR2A      | NM_005988         | small proline-rich protein 2A                                   | 2.2807808   | up         |
| KNDC1       | NM_152643         | kinase non-catalytic C-lobe domain (KIND) containing 1          | 2.3655996   | up         |
| CSN1S2AP    | NR_003720         | casein alpha s2-like A, pseudogene                              | 2.8103547   | up         |
| ETS1        | NM_005238         | v-ets erythroblastosis virus E26 oncogene homolog 1 (avian)     | 2.106572    | up         |
| CPNE6       | NM_006032         | copine VI (neuronal)                                            | 2.5055895   | up         |
| NCK2        | NM_003581         | NCK adaptor protein 2                                           | 2.4129615   | up         |
| EFCAB3      | NM_173503         | EF-hand calcium binding domain 3                                | 3.4859395   | up         |

|              |              |                                                                              |              |
|--------------|--------------|------------------------------------------------------------------------------|--------------|
|              |              |                                                                              | 2.2170436 up |
| LOC729305    | XR_132809    | uncharacterized LOC729305                                                    | 2.516636 up  |
| ADAM21       | NM_003813    | ADAM metalloproteinase domain 21                                             | 2.5039046 up |
| LOC643529    | NR_038382    | hCG2024094                                                                   | 2.3166313 up |
|              | AF469204     |                                                                              | 2.0560994 up |
| OTP          | NM_032109    | orthopedia homeobox                                                          | 2.885809 up  |
| LOC100131138 | NR_036513    | uncharacterized LOC100131138                                                 | 2.896989 up  |
| ABCC13       | NR_003088    | ATP-binding cassette, sub-family C (CFTR/MRP), member 13, pseudogene         | 2.7825346 up |
|              |              |                                                                              | 2.3469405 up |
| CD99L2       | BC025729     | CD99 molecule-like 2                                                         | 3.9024413 up |
| PBX1         | NM_002585    | pre-B-cell leukemia homeobox 1                                               | 2.5033636 up |
| TRAM1        | NM_014294    | translocation associated membrane protein 1                                  | 2.0305283 up |
| C6orf97      | NM_025059    | chromosome 6 open reading frame 97                                           | 2.0603268 up |
| KCNK17       | NM_031460    | potassium channel, subfamily K, member 17                                    | 2.0954254 up |
| LPAR6        | NM_005767    | lysophosphatidic acid receptor 6                                             | 2.3590717 up |
| TAF1B        | NM_005680    | TATA box binding protein (TBP)-associated factor, RNA polymerase I, B, 63kDa | 2.0075934 up |
| EPHB2        | NM_004442    | EPH receptor B2                                                              | 2.2783122 up |
| CLEC7A       | NM_197947    | C-type lectin domain family 7, member A                                      | 2.0963047 up |
| TCEA1        | NM_006756    | transcription elongation factor A (SII), 1                                   | 2.1890926 up |
|              |              |                                                                              | 2.4983416 up |
| CNTNAP2      | NM_014141    | contactin associated protein-like 2                                          | 2.3479564 up |
| TRUB1        | NM_139169    | TruB pseudouridine (psi) synthase homolog 1 (E. coli)                        | 2.062541 up  |
| CLK1         | NM_001162407 | CDC-like kinase 1                                                            | 2.8655984 up |
| LOC401127    | NR_026854    | WD repeat domain 5 pseudogene                                                | 2.8764637 up |
|              | AK093119     |                                                                              | 2.2098558 up |
| GGH          | NM_003878    | gamma-glutamyl hydrolase (conjugase, foylpolypogammaglutamyl hydrolase)      | 2.1032088 up |
| CBLL1        | NM_024814    | Cas-Br-M (murine) ecotropic retroviral transforming sequence-like 1          | 2.181801 up  |
| PMEL         | NM_006928    | premelanosome protein                                                        | 2.0764756 up |
| TRAT1        | NM_016388    | T cell receptor associated transmembrane adaptor 1                           | 2.0102658 up |
| ERBB3        | NM_001982    | v-erb-b2 erythroblastic leukemia viral oncogene homolog 3 (avian)            | 2.1594281 up |
|              | CU677518     |                                                                              | 2.5904014 up |
| NXF3         | NM_022052    | nuclear RNA export factor 3                                                  | 2.1772964 up |
| RASGEF1B     | NM_152545    | RasGEF domain family, member 1B                                              | 2.379134 up  |
| PRKAA1       | NM_206907    | protein kinase, AMP-activated, alpha 1 catalytic subunit                     | 2.0089328 up |
| NDFIP2       | NM_019080    | Nedd4 family interacting protein 2                                           | 2.0371866 up |
|              |              |                                                                              | 3.2509692 up |
| SYT15        | NM_181519    | synaptotagmin XV                                                             | 2.228985 up  |
| DSCR8        | NR_026838    | Down syndrome critical region gene 8                                         | 2.3851957 up |
| MRC2         | NM_006039    | mannose receptor, C type 2                                                   | 2.2330055 up |
| VNN2         | NM_004665    | vanin 2                                                                      | 2.119297 up  |

|              |              |                                                                  |              |
|--------------|--------------|------------------------------------------------------------------|--------------|
| RB1          | NM_000321    | retinoblastoma 1                                                 | 2.1439729 up |
| CXorf57      | NM_018015    | chromosome X open reading frame 57                               | 2.147257 up  |
| LOC100653325 | XM_003403750 | uncharacterized LOC100653325                                     | 2.908699 up  |
| PRSS33       | NM_152891    | protease, serine, 33                                             | 2.6216602 up |
| CASD1        | NM_022900    | CAS1 domain containing 1                                         | 2.2140183 up |
| LOC149837    | NR_015406    | uncharacterized LOC149837                                        | 2.6367295 up |
| BNIP3L       | NM_004331    | BCL2/adenovirus E1B 19kDa interacting protein 3-like             | 3.1700666 up |
| LINC00240    | NR_026775    | long intergenic non-protein coding RNA 240                       | 2.9120626 up |
| ANP32E       | NM_030920    | acidic (leucine-rich) nuclear phosphoprotein 32 family, member E | 2.136219 up  |
| ARHGAP40     | NM_001164431 | Rho GTPase activating protein 40                                 | 2.0468392 up |
| ASPSCR1      | AK127159     | alveolar soft part sarcoma chromosome region, candidate 1        | 2.424498 up  |
| PANK3        | BX648891     | pantothenate kinase 3                                            | 2.084829 up  |
| ST7L         | NM_138729    | suppression of tumorigenicity 7 like                             | 2.4821072 up |
| DNHD1        | NM_144666    | dynein heavy chain domain 1                                      | 2.0509136 up |
| SUV420H1     | NM_017635    | suppressor of variegation 4-20 homolog 1 (Drosophila)            | 2.4649494 up |
| GPR78        | NM_080819    | G protein-coupled receptor 78                                    | 2.1594136 up |
| LYZL6        | NM_020426    | lysozyme-like 6                                                  | 2.1683214 up |
| FZD6         | NM_003506    | frizzled family receptor 6                                       | 2.0556123 up |
| GUSBP1       | NR_027027    | glucuronidase, beta pseudogene 1                                 | 2.0721304 up |
| ZBTB6        | NM_006626    | zinc finger and BTB domain containing 6                          | 2.0950403 up |
| A2ML1        | NM_144670    | alpha-2-macroglobulin-like 1                                     | 2.2553496 up |
| PCGEM1       | NR_002769    | prostate-specific transcript 1 (non-protein coding)              | 2.5509214 up |
|              | DA372173     |                                                                  | 2.2742875 up |
| SLC25A32     | NM_030780    | solute carrier family 25, member 32                              | 2.44969 up   |
| UBE3A        | NM_130839    | ubiquitin protein ligase E3A                                     | 2.2440147 up |
| KLHDC8A      | NM_018203    | kelch domain containing 8A                                       | 2.1684434 up |
| DNAJC6       | NM_014787    | DnaJ (Hsp40) homolog, subfamily C, member 6                      | 2.1866822 up |
| DNAJA2       | NM_005880    | DnaJ (Hsp40) homolog, subfamily A, member 2                      | 2.431748 up  |
| HRH4         | NM_021624    | histamine receptor H4                                            | 2.6878061 up |
| CYP2B6       | NM_000767    | cytochrome P450, family 2, subfamily B, polypeptide 6            | 2.3794148 up |
| LOC646851    |              | putative uncharacterized protein LOC388900                       | 2.0696096 up |
| DPPA5        | NM_001025290 | developmental pluripotency associated 5                          | 2.4035685 up |
| VSIG10       | NM_019086    | V-set and immunoglobulin domain containing 10                    | 2.181112 up  |
| LRP12        | NM_013437    | low density lipoprotein receptor-related protein 12              | 2.2275164 up |
| USP1         | NM_003368    | ubiquitin specific peptidase 1                                   | 2.1401176 up |
| PPCS         |              | phosphopantothencysteine synthetase                              | 2.4874487 up |
| SKAP2        | NM_003930    | src kinase associated phosphoprotein 2                           | 2.0402973 up |
| E2F2         | NM_004091    | E2F transcription factor 2                                       | 3.4562614 up |
|              |              |                                                                  | 2.1896882 up |
| CX3CL1       | NM_002996    | chemokine (C-X3-C motif) ligand 1                                | 2.070115 up  |
| RSRC1        | NM_016625    | arginine/serine-rich coiled-coil 1                               | 2.0188031 up |

|           |              |                                                                             |                              |
|-----------|--------------|-----------------------------------------------------------------------------|------------------------------|
| ICA1      | NM_004968    | islet cell autoantigen 1, 69kDa                                             | 2.4965518 up                 |
| PLEKHF2   | NM_024613    | pleckstrin homology domain containing, family F (with FYVE domain) member 2 | 2.0311363 up                 |
| ASB7      | NM_198243    | ankyrin repeat and SOCS box containing 7                                    | 2.0143614 up                 |
| EGR2      | NM_000399    | early growth response 2                                                     | 3.0035136 up                 |
| ZNF235    | NM_004234    | zinc finger protein 235                                                     | 2.211763 up                  |
| MYH7      | NM_000257    | myosin, heavy chain 7, cardiac muscle, beta                                 | 2.426603 up                  |
| LYRM5     | NM_001001660 | LYR motif containing 5                                                      | 2.1336875 up                 |
| MKRN1     | NM_013446    | makorin ring finger protein 1                                               | 2.173403 up                  |
| TAS2R50   | NM_176890    | taste receptor, type 2, member 50                                           | 2.1007218 up                 |
| PGGT1B    | NM_005023    | protein geranylgeranyltransferase type I, beta subunit                      | 2.152535 up                  |
| F13A1     | NM_000129    | coagulation factor XIII, A1 polypeptide                                     | 2.1604183 up<br>2.987308 up  |
| C1S       | NM_001734    | complement component 1, s subcomponent                                      | 2.8285618 up                 |
| HLF       | NM_002126    | hepatic leukemia factor                                                     | 2.1526155 up                 |
| TREML4    | NM_198153    | triggering receptor expressed on myeloid cells-like 4                       | 2.3565435 up                 |
| ECHDC1    | NM_018479    | enoyl CoA hydratase domain containing 1                                     | 2.1612232 up                 |
| HIST2H2BF | NM_001161334 | histone cluster 2, H2bf                                                     | 2.5397558 up                 |
| RBM44     | NM_001080504 | RNA binding motif protein 44                                                | 2.0121586 up                 |
| DIXDC1    | NM_001037954 | DIX domain containing 1                                                     | 2.7631285 up                 |
| ITPKB     | NM_002221    | inositol-trisphosphate 3-kinase B                                           | 2.588736 up                  |
| OLFM4     | NM_006418    | olfactomedin 4                                                              | 2.48169 up                   |
|           | XR_109175    |                                                                             | 2.015282 up                  |
| SPATA21   | NM_198546    | spermatogenesis associated 21                                               | 2.326341 up                  |
| ATP6V0E1  | NM_003945    | ATPase, H+ transporting, lysosomal 9kDa, V0 subunit e1                      | 2.058492 up<br>2.0634086 up  |
| RAB39B    | NM_171998    | RAB39B, member RAS oncogene family                                          | 2.1268976 up<br>2.250161 up  |
| WBP5      | NM_016303    | WW domain binding protein 5                                                 | 2.0082836 up                 |
|           | DB462629     |                                                                             | 3.4639966 up                 |
| UHRF1     | NM_013282    | ubiquitin-like with PHD and ring finger domains 1                           | 2.0640435 up                 |
| THAP9     | NM_024672    | THAP domain containing 9                                                    | 2.0142074 up                 |
| TFF3      | NM_003226    | trefoil factor 3 (intestinal)                                               | 2.442851 up                  |
| CXCL12    | NM_001033886 | chemokine (C-X-C motif) ligand 12                                           | 2.420027 up                  |
| LARP1B    | NM_032239    | La ribonucleoprotein domain family, member 1B                               | 2.1858144 up                 |
| ZC3H14    | NM_024824    | zinc finger CCCH-type containing 14                                         | 2.1468008 up                 |
| FAM105B   | NM_138348    | family with sequence similarity 105, member B                               | 2.0286233 up                 |
| BCAT1     | NM_005504    | branched chain amino-acid transaminase 1, cytosolic                         | 2.249215 up                  |
| EMP1      | NM_001423    | epithelial membrane protein 1                                               | 2.1554358 up<br>2.6047971 up |
| XPR1      | NM_004736    | xenotropic and polytropic retrovirus receptor 1                             | 2.2743802 up                 |

|              |              |                                                                                   |              |
|--------------|--------------|-----------------------------------------------------------------------------------|--------------|
| WBSCR17      | NM_022479    | Williams-Beuren syndrome chromosome region 17                                     | 3.189225 up  |
| GEMIN2       | NM_003616    | gem (nuclear organelle) associated protein 2                                      | 2.307731 up  |
| FLJ43663     | NR_015431    | uncharacterized LOC378805                                                         | 2.073444 up  |
| MAMSTR       | NM_182574    | MEF2 activating motif and SAP domain containing transcriptional regulator         | 2.463689 up  |
| TTY12        | NR_001551    | testis-specific transcript, Y-linked 12 (non-protein coding)                      | 2.6459787 up |
| NOV          | NM_002514    | nephroblastoma overexpressed gene                                                 | 2.0665514 up |
|              |              |                                                                                   | 2.8055496 up |
| LOC100505876 | NR_037879    | uncharacterized LOC100505876                                                      | 2.0519989 up |
| FAM76B       | NM_144664    | family with sequence similarity 76, member B                                      | 2.1129181 up |
|              | XM_931148    |                                                                                   | 2.4586365 up |
| YEATS4       | NM_006530    | YEATS domain containing 4                                                         | 2.0349157 up |
| PHC3         | NM_024947    | polyhomeotic homolog 3 (Drosophila)                                               | 2.1305237 up |
| SERPING1     |              | serpin peptidase inhibitor, clade G (C1 inhibitor), member 1                      | 2.3713517 up |
| HAS1         | NM_001523    | hyaluronan synthase 1                                                             | 2.2748744 up |
| AFAP1        | NM_001134647 | actin filament associated protein 1                                               | 2.338585 up  |
| RGS12        | NM_002926    | regulator of G-protein signaling 12                                               | 2.4563916 up |
|              |              |                                                                                   | 2.6360404 up |
| KRT1         | NM_006121    | keratin 1                                                                         | 3.2459288 up |
| MFAP3L       | NM_021647    | microfibrillar-associated protein 3-like                                          | 2.8052254 up |
| PPP1R3G      | NM_001145115 | protein phosphatase 1, regulatory subunit 3G                                      | 2.0523548 up |
| KIAA0664     | NM_015229    | KIAA0664                                                                          | 3.1315942 up |
| NPPA         | NM_006172    | natriuretic peptide A                                                             | 2.326938 up  |
| LRTM1        | NM_020678    | leucine-rich repeats and transmembrane domains 1                                  | 2.12895 up   |
| TAF1         | NM_004606    | TAF1 RNA polymerase II, TATA box binding protein (TBP)-associated factor, 250kDa  | 2.2413568 up |
| TAF4B        | NM_005640    | TAF4b RNA polymerase II, TATA box binding protein (TBP)-associated factor, 105kDa | 2.303319 up  |
| DCT          | NM_001922    | dopachrome tautomerase (dopachrome delta-isomerase, tyrosine-related protein 2)   | 2.9082742 up |
| PTPRK        | NM_002844    | protein tyrosine phosphatase, receptor type, K                                    | 2.1001608 up |
|              |              |                                                                                   | 2.8254147 up |
| ATXN1        | NM_000332    | ataxin 1                                                                          | 2.852338 up  |
| FEM1B        | NM_015322    | fem-1 homolog b (C. elegans)                                                      | 2.2095041 up |
| STC1         | NM_003155    | stanniocalcin 1                                                                   | 2.8113954 up |
| ERAP1        | NM_001040458 | endoplasmic reticulum aminopeptidase 1                                            | 2.2850757 up |
| SRSF8        | NM_032102    | serine/arginine-rich splicing factor 8                                            | 2.1073203 up |
| TGM4         | NM_003241    | transglutaminase 4 (prostate)                                                     | 2.0748248 up |
| ACTR2        | NM_001005386 | ARP2 actin-related protein 2 homolog (yeast)                                      | 2.082664 up  |
| DKFZP434H168 | NR_026889    | uncharacterized LOC26077                                                          | 2.367622 up  |
| NT5C1A       | NM_032526    | 5'-nucleotidase, cytosolic IA                                                     | 3.2178488 up |
| DACT1        | NM_016651    | dapper, antagonist of beta-catenin, homolog 1 (Xenopus laevis)                    | 2.8586888 up |
|              |              |                                                                                   | 2.6001701 up |

|              |              |                                                              |              |
|--------------|--------------|--------------------------------------------------------------|--------------|
| C18orf10     | NM_015476    | chromosome 18 open reading frame 10                          | 2.4458992 up |
| TBC1D9       | NM_015130    | TBC1 domain family, member 9 (with GRAM domain)              | 2.0756447 up |
|              |              |                                                              | 2.2269216 up |
| ZC3H12B      | NM_001010888 | zinc finger CCCH-type containing 12B                         | 2.7539322 up |
| KRTAP15-1    | NM_181623    | keratin associated protein 15-1                              | 2.3450232 up |
| PVR          | NM_006505    | poliovirus receptor                                          | 2.329061 up  |
| NDUFA5       | NM_005000    | NADH dehydrogenase (ubiquinone) 1 alpha subcomplex, 5, 13kDa | 2.07942 up   |
| FSD1         | NM_024333    | fibronectin type III and SPRY domain containing 1            | 3.3686712 up |
| ZNF334       | NM_199441    | zinc finger protein 334                                      | 2.1063576 up |
| RPIA         | NM_144563    | ribose 5-phosphate isomerase A                               | 2.1208103 up |
| DCAF16       | NM_017741    | DDB1 and CUL4 associated factor 16                           | 2.0078003 up |
| UGDH         | NM_003359    | UDP-glucose 6-dehydrogenase                                  | 2.3007631 up |
| C8orf31      | NM_173687    | chromosome 8 open reading frame 31                           | 2.0861464 up |
| LRRD1        | NM_001161528 | leucine-rich repeats and death domain containing 1           | 2.6135151 up |
|              |              |                                                              | 2.67043 up   |
| SCP2         | NM_002979    | sterol carrier protein 2                                     | 2.0640256 up |
| INADL        | NM_176877    | InaD-like (Drosophila)                                       | 2.3543868 up |
| JKAMP        | NM_016475    | JNK1/MAPK8-associated membrane protein                       | 3.0562344 up |
| COL9A2       | BC065715     | collagen, type IX, alpha 2                                   | 2.650093 up  |
| CDC5L        | NM_001253    | CDC5 cell division cycle 5-like (S. pombe)                   | 2.244164 up  |
|              |              |                                                              | 2.273086 up  |
| S100P        | NM_005980    | S100 calcium binding protein P                               | 4.51571 up   |
| FLJ40536     | AK097855     | FLJ40536 protein                                             | 3.1316957 up |
| TMEM212      | NM_001164436 | transmembrane protein 212                                    | 2.082301 up  |
| C1orf185     | NM_001136508 | chromosome 1 open reading frame 185                          | 2.2304368 up |
|              | AL831934     |                                                              | 2.4530811 up |
| TRIOBP       | NM_138632    | TRIO and F-actin binding protein                             | 3.1698763 up |
| RAB2B        | NM_032846    | RAB2B, member RAS oncogene family                            | 2.0913925 up |
| SRSF1        | NM_001078166 | serine/arginine-rich splicing factor 1                       | 2.0052543 up |
| TCL6         | BC041075     | T-cell leukemia/lymphoma 6 (non-protein coding)              | 3.3149445 up |
| KLKB1        | NM_000892    | kallikrein B, plasma (Fletcher factor) 1                     | 2.353181 up  |
| PPP6C        | NM_002721    | protein phosphatase 6, catalytic subunit                     | 2.0964527 up |
| KANK2        | NM_015493    | KN motif and ankyrin repeat domains 2                        | 2.0405536 up |
| EIF5         | NM_001969    | eukaryotic translation initiation factor 5                   | 2.0252223 up |
| LOC644192    | XR_111553    | uncharacterized LOC644192                                    | 2.560938 up  |
| QRSL1        | NM_018292    | glutamyl-tRNA synthase (glutamine-hydrolyzing)-like 1        | 2.1386185 up |
| LOC100130503 | XM_001717149 | uncharacterized LOC100130503                                 | 3.0229201 up |
| C15orf54     | NM_207445    | chromosome 15 open reading frame 54                          | 2.5744312 up |
| PCDH9        | BC150296     | protocadherin 9                                              | 2.9098659 up |
| OLFM3        | NM_058170    | olfactomedin 3                                               | 2.0711882 up |
| ERV18-1      | AK126787     | endogenous retrovirus group 18, member 1                     | 2.1447368 up |

|                |              |                                                                           |              |
|----------------|--------------|---------------------------------------------------------------------------|--------------|
| BNIP3L         | NM_004331    | BCL2/adenovirus E1B 19kDa interacting protein 3-like                      | 2.0753558 up |
| KIAA1199       | NM_018689    | KIAA1199                                                                  | 3.0143433 up |
|                |              |                                                                           | 2.2138634 up |
| C9orf30-TMEFF1 | NM_001198812 | C9orf30-TMEFF1 readthrough                                                | 3.3958824 up |
| MYZAP          | NM_001018100 | myocardial zonula adherens protein                                        | 2.1927118 up |
| CALM2          | NM_001743    | calmodulin 2 (phosphorylase kinase, delta)                                | 2.0738442 up |
| COX11          | NM_004375    | COX11 cytochrome c oxidase assembly homolog (yeast)                       | 2.217919 up  |
| PTEN           | NM_000314    | phosphatase and tensin homolog                                            | 2.2400694 up |
| LCN1           | NM_002297    | lipocalin 1                                                               | 2.2093573 up |
| RCAN2          | NM_005822    | regulator of calcineurin 2                                                | 2.8625188 up |
| PAQR3          | NM_001040202 | progesterin and adipoQ receptor family member III                         | 3.2449074 up |
| KCND3          | NM_004980    | potassium voltage-gated channel, Shal-related subfamily, member 3         | 2.0554535 up |
| PTGFRN         | NM_020440    | prostaglandin F2 receptor negative regulator                              | 3.1173081 up |
| SP4            | NM_003112    | Sp4 transcription factor                                                  | 2.0376666 up |
| RBM3           | NM_006743    | RNA binding motif (RNP1, RRM) protein 3                                   | 2.1024055 up |
| NR3C1          | NM_001018077 | nuclear receptor subfamily 3, group C, member 1 (glucocorticoid receptor) | 2.006029 up  |
| HACE1          | NM_020771    | HECT domain and ankyrin repeat containing, E3 ubiquitin protein ligase 1  | 2.025491 up  |
| PPP1CB         | NM_002709    | protein phosphatase 1, catalytic subunit, beta isozyme                    | 2.2256777 up |
| ZBTB8A         | NM_001040441 | zinc finger and BTB domain containing 8A                                  | 2.1779 up    |
| LHFPL5         | NM_182548    | lipoma HMGIC fusion partner-like 5                                        | 2.1454184 up |
| LOC146336      | NR_027242    | uncharacterized LOC146336                                                 | 2.5623827 up |
| MEF2A          | NM_001171894 | myocyte enhancer factor 2A                                                | 2.020954 up  |
| OR51E1         | NM_152430    | olfactory receptor, family 51, subfamily E, member 1                      | 2.3279693 up |
| COLEC10        | NM_006438    | collectin sub-family member 10 (C-type lectin)                            | 2.115921 up  |
| MAP7           | NM_003980    | microtubule-associated protein 7                                          | 2.1426651 up |
| MS4A1          | NM_152866    | membrane-spanning 4-domains, subfamily A, member 1                        | 2.8324542 up |
| AKR1CL1        | NR_027916    | aldo-keto reductase family 1, member C-like 1                             | 2.9109092 up |
| TSPYL6         | NM_001003937 | TSPY-like 6                                                               | 3.3759797 up |
| C2orf69        | NM_153689    | chromosome 2 open reading frame 69                                        | 2.2670038 up |
| ZFHX4          | NM_024721    | zinc finger homeobox 4                                                    | 3.385703 up  |
| ROBO3          | NM_022370    | roundabout, axon guidance receptor, homolog 3 (Drosophila)                | 2.0279005 up |
| AKD1           | NM_145025    | adenylate kinase domain containing 1                                      | 2.197917 up  |
| RGSL1          | NM_001137669 | regulator of G-protein signaling like 1                                   | 3.459836 up  |
| SRP72          | NM_006947    | signal recognition particle 72kDa                                         | 2.125636 up  |
| GRIK1-AS1      | NR_027021    | GRIK1 antisense RNA 1 (non-protein coding)                                | 2.1970606 up |
| WSB2           | NM_018639    | WD repeat and SOCS box containing 2                                       | 2.034205 up  |
| TPD52L3        | NM_001001874 | tumor protein D52-like 3                                                  | 3.119155 up  |
| NR3C1          | NM_001018077 | nuclear receptor subfamily 3, group C, member 1 (glucocorticoid receptor) | 2.1705637 up |
| WNT4           | NM_030761    | wingless-type MMTV integration site family, member 4                      | 2.174202 up  |
| IGFL2          | NM_001002915 | IGF-like family member 2                                                  | 2.4721038 up |

|              |              |                                                                                                                                                |                              |
|--------------|--------------|------------------------------------------------------------------------------------------------------------------------------------------------|------------------------------|
| ANKRD62      | XM_003118756 | ankyrin repeat domain 62                                                                                                                       | 2.1289215 up                 |
| ADORA1       | NM_000674    | adenosine A1 receptor                                                                                                                          | 2.4411824 up                 |
| HSPA5        | NM_005347    | heat shock 70kDa protein 5 (glucose-regulated protein, 78kDa)                                                                                  | 2.031998 up                  |
| EGR1         | NM_001964    | early growth response 1                                                                                                                        | 7.548753 up                  |
| APOBEC4      | NM_203454    | apolipoprotein B mRNA editing enzyme, catalytic polypeptide-like 4 (putative)                                                                  | 2.7338746 up<br>2.409002 up  |
| AGTR1        | NM_031850    | angiotensin II receptor, type 1                                                                                                                | 2.2404194 up                 |
| EIF2S1       | NM_004094    | eukaryotic translation initiation factor 2, subunit 1 alpha, 35kDa                                                                             | 2.2701647 up                 |
| ZIC1         | NM_003412    | Zic family member 1                                                                                                                            | 2.0940816 up                 |
| LDHA         | NM_005566    | lactate dehydrogenase A                                                                                                                        | 2.2790577 up                 |
| PNMA2        | NM_007257    | paraneoplastic antigen MA2                                                                                                                     | 2.2493417 up                 |
| LMLN         | NM_033029    | leishmanolysin-like (metallopeptidase M8 family)                                                                                               | 3.6547103 up                 |
| ZMAT1        | NM_001011657 | zinc finger, matrin-type 1                                                                                                                     | 2.0963748 up                 |
| GNN          | NR_027249    | Grp94 neighboring nucleotidase pseudogene                                                                                                      | 2.4237833 up                 |
| PPP4R1L      | NR_003505    | protein phosphatase 4, regulatory subunit 1-like                                                                                               | 2.1227238 up                 |
| POLR2F       |              | polymerase (RNA) II (DNA directed) polypeptide F                                                                                               | 2.1393638 up                 |
| HMGCS1       | NM_002130    | 3-hydroxy-3-methylglutaryl-CoA synthase 1 (soluble)                                                                                            | 2.22892 up                   |
| PWWP2A       | NM_052927    | PWWP domain containing 2A                                                                                                                      | 2.0591938 up                 |
| FGF1         | NM_000800    | fibroblast growth factor 1 (acidic)                                                                                                            | 2.0427027 up                 |
| WNT5A        | NM_003392    | wingless-type MMTV integration site family, member 5A                                                                                          | 2.52388 up                   |
| SEMA5B       | NM_001031702 | sema domain, seven thrombospondin repeats (type 1 and type 1-like),<br>transmembrane domain (TM) and short cytoplasmic domain, (semaphorin) 5B | 3.1140442 up<br>2.5068834 up |
| TANK         | NM_133484    | TRAF family member-associated NFKB activator                                                                                                   | 2.1689553 up                 |
| PTPRJ        | NM_001098503 | protein tyrosine phosphatase, receptor type, J                                                                                                 | 2.8290167 up                 |
| INSIG1       | NM_005542    | insulin induced gene 1                                                                                                                         | 2.4062417 up                 |
| HCAR2        | NM_177551    | hydroxycarboxylic acid receptor 2                                                                                                              | 2.0337234 up                 |
| LGALS1       | NM_014181    | lectin, galactoside-binding-like                                                                                                               | 2.2940598 up                 |
| GPX1         | NM_201397    | glutathione peroxidase 1                                                                                                                       | 2.0866086 up                 |
| LOC100128278 | XR_110306    | uncharacterized LOC100128278                                                                                                                   | 2.0862908 up                 |
| PAGE2B       | NM_001015038 | P antigen family, member 2B                                                                                                                    | 2.3100486 up                 |
| NR2C1        | NM_001032287 | nuclear receptor subfamily 2, group C, member 1                                                                                                | 2.2078183 up                 |
| BBS7         | NM_018190    | Bardet-Biedl syndrome 7                                                                                                                        | 2.3186517 up                 |
| LOC254312    | NR_015413    | uncharacterized LOC254312                                                                                                                      | 2.2718897 up                 |
| LRRN1        | NM_020873    | leucine rich repeat neuronal 1                                                                                                                 | 2.6343048 up                 |
| LOC100505648 | NR_040058    | uncharacterized LOC100505648                                                                                                                   | 2.584224 up                  |
| ATP6V1E1     | NM_001696    | ATPase, H+ transporting, lysosomal 31kDa, V1 subunit E1                                                                                        | 2.3589697 up                 |
| ARGLU1       | AK304751     | arginine and glutamate rich 1                                                                                                                  | 2.158685 up                  |
| LINC00239    | NR_026774    | long intergenic non-protein coding RNA 239                                                                                                     | 2.4558783 up                 |
| TFPI         | NM_006287    | tissue factor pathway inhibitor (lipoprotein-associated coagulation inhibitor)                                                                 | 2.8298364 up                 |

|           |              |                                                                     |              |
|-----------|--------------|---------------------------------------------------------------------|--------------|
| MMAB      | NM_052845    | methylmalonic aciduria (cobalamin deficiency) cblB type             | 2.0586534 up |
|           |              |                                                                     | 2.0243075 up |
| ARID5B    | NM_032199    | AT rich interactive domain 5B (MRF1-like)                           | 2.1512454 up |
| FAM149B1  | NM_173348    | family with sequence similarity 149, member B1                      | 2.105633 up  |
| MOB4      | NM_015387    | MOB family member 4, phocein                                        | 2.1700034 up |
| TXNDC17   | NM_032731    | thioredoxin domain containing 17                                    | 2.0698392 up |
|           |              |                                                                     | 2.062969 up  |
| METTL21A  | NM_001127395 | methyltransferase like 21A                                          | 2.144304 up  |
| HNRNPA2B1 | NM_002137    | heterogeneous nuclear ribonucleoprotein A2/B1                       | 2.6643212 up |
| FLI1      | NM_002017    | Friend leukemia virus integration 1                                 | 2.0435832 up |
| LDOC1     | NM_012317    | leucine zipper, down-regulated in cancer 1                          | 2.162084 up  |
|           | JF834318     |                                                                     | 2.0780642 up |
| ANO6      | NM_001025356 | anoctamin 6                                                         | 2.251815 up  |
| SPATA18   | NM_145263    | spermatogenesis associated 18 homolog (rat)                         | 2.1164663 up |
| TRIP12    | NM_004238    | thyroid hormone receptor interactor 12                              | 2.0887654 up |
| STK17B    | NM_004226    | serine/threonine kinase 17b                                         | 2.2759771 up |
| TRPA1     | NM_007332    | transient receptor potential cation channel, subfamily A, member 1  | 2.3513865 up |
| HTN1      | NM_002159    | histatin 1                                                          | 2.5871925 up |
| C20orf141 | NM_080739    | chromosome 20 open reading frame 141                                | 2.1620407 up |
|           |              |                                                                     | 2.3585575 up |
| HNRPDL    | NM_031372    | heterogeneous nuclear ribonucleoprotein D-like                      | 2.0329182 up |
| C17orf42  | NM_024683    | chromosome 17 open reading frame 42                                 | 2.3261764 up |
| DEFB126   | NM_030931    | defensin, beta 126                                                  | 2.0526075 up |
| CLIP4     | NM_024692    | CAP-GLY domain containing linker protein family, member 4           | 2.490263 up  |
| NCBP1     |              | nuclear cap binding protein subunit 1, 80kDa                        | 2.448397 up  |
| OR5AN1    | NM_001004729 | olfactory receptor, family 5, subfamily AN, member 1                | 2.1693134 up |
| DNAH14    |              | dynein, axonemal, heavy chain 14                                    | 2.2328424 up |
| CHST9     | NM_031422    | carbohydrate (N-acetylgalactosamine 4-0) sulfotransferase 9         | 2.297745 up  |
| PRSS36    | NM_173502    | protease, serine, 36                                                | 2.410336 up  |
| ZNF804B   | NM_181646    | zinc finger protein 804B                                            | 2.3050272 up |
| SERPINB9  | NM_004155    | serpin peptidase inhibitor, clade B (ovalbumin), member 9           | 2.2028115 up |
| ARPP21    | NM_016300    | cAMP-regulated phosphoprotein, 21kDa                                | 3.719478 up  |
| ZNF271    | NR_024565    | zinc finger protein 271                                             | 2.343139 up  |
|           |              |                                                                     | 2.427121 up  |
| WDR49     | AK097556     | WD repeat domain 49                                                 | 2.124233 up  |
| AKAP6     | NM_004274    | A kinase (PRKA) anchor protein 6                                    | 3.412468 up  |
| RIN2      | NM_018993    | Ras and Rab interactor 2                                            | 2.0434923 up |
| MKL2      | NM_014048    | MKL/myocardin-like 2                                                | 2.0342753 up |
| ZNF673    | AK097159     | zinc finger family member 673                                       | 2.2941186 up |
| SLC12A5   | NM_020708    | solute carrier family 12 (potassium/chloride transporter), member 5 | 2.1169405 up |
| FAM171B   | NM_177454    | family with sequence similarity 171, member B                       | 2.3244078 up |

|          |              |                                                          |              |
|----------|--------------|----------------------------------------------------------|--------------|
| POU2AF1  | NM_006235    | POU class 2 associating factor 1                         | 2.0351043 up |
| LRRTM2   | NM_015564    | leucine rich repeat transmembrane neuronal 2             | 2.0155501 up |
|          | XM_001721393 |                                                          | 2.6143386 up |
| SPTA1    | NM_003126    | spectrin, alpha, erythrocytic 1 (elliptocytosis 2)       | 2.798148 up  |
|          |              |                                                          | 3.8620672 up |
| DEFA4    | NM_001925    | defensin, alpha 4, corticostatin                         | 2.1196764 up |
| RBM12    | NM_006047    | RNA binding motif protein 12                             | 2.0118887 up |
|          |              |                                                          | 2.006014 up  |
| METAP2   | NM_006838    | methionyl aminopeptidase 2                               | 2.1589792 up |
| FONG     | NR_034096    | uncharacterized LOC348751                                | 2.1759725 up |
| CLIC4    | NM_013943    | chloride intracellular channel 4                         | 2.7739673 up |
|          |              |                                                          | 4.2431383 up |
| EVI2A    | NM_001003927 | ecotropic viral integration site 2A                      | 2.1364188 up |
|          |              |                                                          | 2.3581214 up |
| CLCN4    | NM_001830    | chloride channel 4                                       | 2.0227542 up |
| PPAPDC3  |              | phosphatidic acid phosphatase type 2 domain containing 3 | 2.159848 up  |
| CNGA2    | NM_005140    | cyclic nucleotide gated channel alpha 2                  | 2.0578973 up |
| CCL11    | NM_002986    | chemokine (C-C motif) ligand 11                          | 2.0526867 up |
| CPEB4    | NM_030627    | cytoplasmic polyadenylation element binding protein 4    | 2.160189 up  |
| MCAT     | NM_173467    | malonyl CoA:ACP acyltransferase (mitochondrial)          | 2.3976038 up |
| MB21D2   | NM_178496    | Mab-21 domain containing 2                               | 2.573574 up  |
| TDH      | NR_001578    | L-threonine dehydrogenase                                | 2.354822 up  |
| LIMD1    | NM_014240    | LIM domains containing 1                                 | 2.399504 up  |
| NAP1L1   | NM_139207    | nucleosome assembly protein 1-like 1                     | 2.209823 up  |
| YTHDF3   | NM_152758    | YTH domain family, member 3                              | 2.0574346 up |
| SENP6    | NM_015571    | SUMO1/sentrin specific peptidase 6                       | 2.0189803 up |
|          |              |                                                          | 3.1574576 up |
| XG       | NM_175569    | Xg blood group                                           | 2.3177845 up |
| C6orf64  | NM_018322    | chromosome 6 open reading frame 64                       | 2.220312 up  |
| SLITRK5  | NM_015567    | SLIT and NTRK-like family, member 5                      | 2.0472965 up |
| CPNE1    | NM_003915    | copine I                                                 | 2.5574238 up |
| PPP2R3C  | NM_017917    | protein phosphatase 2, regulatory subunit B'', gamma     | 2.1267047 up |
| CNTNAP3  | NM_033655    | contactin associated protein-like 3                      | 2.08096 up   |
| ZNF367   | NM_153695    | zinc finger protein 367                                  | 2.1370528 up |
| C20orf54 | NM_033409    | chromosome 20 open reading frame 54                      | 2.5945551 up |
|          |              |                                                          | 3.6786578 up |
| MYO3A    | BC036079     | myosin IIIA                                              | 2.5491035 up |
| ZNF664   | NM_152437    | zinc finger protein 664                                  | 2.3150718 up |
| GCNT1    | NM_001097634 | glucosaminyl (N-acetyl) transferase 1, core 2            | 2.0211456 up |
| ANXA1    | NM_000700    | annexin A1                                               | 2.0005891 up |
| TTC25    | NM_031421    | tetratricopeptide repeat domain 25                       | 2.5326748 up |

|           |              |                                                                          |              |
|-----------|--------------|--------------------------------------------------------------------------|--------------|
| APOL6     | NM_030641    | apolipoprotein L, 6                                                      | 2.4373572 up |
| YIPF6     | NM_173834    | Yip1 domain family, member 6                                             | 2.0629535 up |
| GSTA7P    | NR_033760    | glutathione S-transferase alpha 7, pseudogene                            | 9.545928 up  |
|           | BX103737     |                                                                          | 2.3013823 up |
| KRTDAP    | NM_207392    | keratinocyte differentiation-associated protein                          | 2.9482884 up |
| ZNF365    | NM_014951    | zinc finger protein 365                                                  | 2.1590126 up |
| CYP39A1   | NM_016593    | cytochrome P450, family 39, subfamily A, polypeptide 1                   | 2.3996668 up |
| WFDC2     | NM_006103    | WAP four-disulfide core domain 2                                         | 4.569528 up  |
| ZCCHC7    | NM_032226    | zinc finger, CCHC domain containing 7                                    | 2.0827682 up |
| LOC645195 | AK123450     | uncharacterized LOC645195                                                | 2.0309558 up |
| HEMGN     | NM_018437    | hemogen                                                                  | 2.504413 up  |
| F5        | NM_000130    | coagulation factor V (proaccelerin, labile factor)                       | 2.1552105 up |
| DNAJC15   | NM_013238    | DnaJ (Hsp40) homolog, subfamily C, member 15                             | 2.3551683 up |
| FAM46C    | NM_017709    | family with sequence similarity 46, member C                             | 2.6403832 up |
| DNAJC21   | NM_194283    | DnaJ (Hsp40) homolog, subfamily C, member 21                             | 2.2258818 up |
| CHTOP     | AK097870     | chromatin target of PRMT1                                                | 2.005364 up  |
| MSL2      | NM_018133    | male-specific lethal 2 homolog (Drosophila)                              | 2.1028452 up |
| HP        | NM_005143    | haptoglobin                                                              | 2.1156824 up |
| TRIM58    | NM_015431    | tripartite motif containing 58                                           | 2.4587033 up |
| FECH      | NM_001012515 | ferrochelatase                                                           | 3.7838116 up |
|           | AK124695     |                                                                          | 3.2575479 up |
| WNK1      | NM_001184985 | WNK lysine deficient protein kinase 1                                    | 2.0270514 up |
| SSB       | NM_003142    | Sjogren syndrome antigen B (autoantigen La)                              | 2.0013916 up |
| HNRNPH3   | NM_012207    | heterogeneous nuclear ribonucleoprotein H3 (2H9)                         | 2.3336275 up |
|           |              |                                                                          | 2.0423963 up |
| ADD2      | NM_017482    | adducin 2 (beta)                                                         | 2.0718493 up |
| SLC14A1   | NM_001146037 | solute carrier family 14 (urea transporter), member 1 (Kidd blood group) | 3.0283325 up |
| FIG4      |              | FIG4 homolog, SAC1 lipid phosphatase domain containing (S. cerevisiae)   | 2.0093048 up |
| TMBIM4    | NM_016056    | transmembrane BAX inhibitor motif containing 4                           | 2.522177 up  |
| NR1D2     | NM_005126    | nuclear receptor subfamily 1, group D, member 2                          | 4.0018487 up |
| LOC147727 | NR_024333    | uncharacterized LOC147727                                                | 2.1628058 up |
| PRDX3     | NM_006793    | peroxiredoxin 3                                                          | 2.8585997 up |
| EPHB4     | NM_004444    | EPH receptor B4                                                          | 2.2087057 up |
| MS4A6A    | NM_152852    | membrane-spanning 4-domains, subfamily A, member 6A                      | 2.3323429 up |
| ACER1     | NM_133492    | alkaline ceramidase 1                                                    | 2.0135407 up |
| RBM12     | NM_006047    | RNA binding motif protein 12                                             | 2.4134982 up |
| LIPA      | NM_000235    | lipase A, lysosomal acid, cholesterol esterase                           | 2.1935859 up |
| NDUFV2    | NM_021074    | NADH dehydrogenase (ubiquinone) flavoprotein 2, 24kDa                    | 2.0734174 up |
| MRPL1     | NM_020236    | mitochondrial ribosomal protein L1                                       | 2.054657 up  |
| CA1       | NM_001738    | carbonic anhydrase I                                                     | 2.6069458 up |
| COL8A2    | NM_005202    | collagen, type VIII, alpha 2                                             | 2.1654181 up |

|           |              |                                                                                          |              |
|-----------|--------------|------------------------------------------------------------------------------------------|--------------|
| MEAF6     | NM_022756    | MYST/Esa1-associated factor 6                                                            | 2.2747684 up |
| STAP1     | NM_012108    | signal transducing adaptor family member 1                                               | 2.0867808 up |
| ECHDC1    | NM_018479    | enoyl CoA hydratase domain containing 1                                                  | 2.2329905 up |
| ATF1      | NM_005171    | activating transcription factor 1                                                        | 2.1539748 up |
| STK17B    | BC052561     | serine/threonine kinase 17b                                                              | 2.6169624 up |
| WDR26     | NM_025160    | WD repeat domain 26                                                                      | 2.102758 up  |
| SNAP23    | NM_003825    | synaptosomal-associated protein, 23kDa                                                   | 2.47934 up   |
| MAB21L2   | NM_006439    | mab-21-like 2 (C. elegans)                                                               | 3.562848 up  |
| ANAPC16   | NM_001242546 | anaphase promoting complex subunit 16                                                    | 2.0838695 up |
|           |              |                                                                                          | 2.8251603 up |
| ZDHHC2    | NM_016353    | zinc finger, DHHC-type containing 2                                                      | 2.258542 up  |
| TWSG1     | NM_020648    | twisted gastrulation homolog 1 (Drosophila)                                              | 2.0730171 up |
|           |              |                                                                                          | 2.439557 up  |
| IFT81     | NM_014055    | intraflagellar transport 81 homolog (Chlamydomonas)                                      | 2.318921 up  |
| C15orf29  | NM_024713    | chromosome 15 open reading frame 29                                                      | 2.0358288 up |
| TUBBP5    | NR_027156    | tubulin, beta pseudogene 5                                                               | 3.9768343 up |
| BRD1      | NM_014577    | bromodomain containing 1                                                                 | 2.194385 up  |
| LYPLAL1   | NM_138794    | lysophospholipase-like 1                                                                 | 2.179327 up  |
| SOX13     | NM_005686    | SRY (sex determining region Y)-box 13                                                    | 2.096142 up  |
| FLJ31306  | NR_029434    | uncharacterized LOC379025                                                                | 2.131765 up  |
| CTDSPL2   | NM_016396    | CTD (carboxy-terminal domain, RNA polymerase II, polypeptide A) small phosphatase like 2 | 2.0725737 up |
| MZT1      | NM_001071775 | mitotic spindle organizing protein 1                                                     | 2.2675748 up |
| OSBPL8    | NM_020841    | oxysterol binding protein-like 8                                                         | 2.103212 up  |
| LOC153577 | AK054653     | uncharacterized LOC153577                                                                | 2.297152 up  |
| LOC151009 | NR_027244    | uncharacterized LOC151009                                                                | 2.0207531 up |
| DDX21     | NM_004728    | DEAD (Asp-Glu-Ala-Asp) box polypeptide 21                                                | 2.1099486 up |
| SCAI      | NM_173690    | suppressor of cancer cell invasion                                                       | 2.0355842 up |
| SLFN11    | NM_001104587 | schlafen family member 11                                                                | 2.0337663 up |
| CD69      | AK303383     | CD69 molecule                                                                            | 2.662265 up  |
| ARMCX2    | NM_014782    | armadillo repeat containing, X-linked 2                                                  | 2.0339794 up |
| C20orf196 | NM_152504    | chromosome 20 open reading frame 196                                                     | 2.2117243 up |
|           |              |                                                                                          | 2.466904 up  |
| SCOC      | NM_032547    | short coiled-coil protein                                                                | 2.552416 up  |
| SLC44A5   | NM_152697    | solute carrier family 44, member 5                                                       | 2.0434926 up |
| SETD7     | BC066361     | SET domain containing (lysine methyltransferase) 7                                       | 2.5649555 up |
| BMP2K     | NM_017593    | BMP2 inducible kinase                                                                    | 2.03252 up   |
| ZNF217    | NM_006526    | zinc finger protein 217                                                                  | 2.3352828 up |
| PLA2G12A  | NM_030821    | phospholipase A2, group X1IA                                                             | 2.042286 up  |
| CFL2      | NM_021914    | cofilin 2 (muscle)                                                                       | 2.5331726 up |
| CLEC2D    | NM_001004419 | C-type lectin domain family 2, member D                                                  | 2.0176551 up |

|           |              |                                                                        |              |
|-----------|--------------|------------------------------------------------------------------------|--------------|
|           |              |                                                                        | 2.5991683 up |
| UBXN4     | NM_014607    | UBX domain protein 4                                                   | 2.1819606 up |
| FAR1      | NM_032228    | fatty acyl CoA reductase 1                                             | 2.0757563 up |
| SKA2      | NM_182620    | spindle and kinetochore associated complex subunit 2                   | 2.2772539 up |
| TBCEL     | NM_152715    | tubulin folding cofactor E-like                                        | 3.0788116 up |
|           |              |                                                                        | 2.1227462 up |
| PIK3R1    | NM_181523    | phosphoinositide-3-kinase, regulatory subunit 1 (alpha)                | 2.1363208 up |
| IFIT1B    | NM_001010987 | interferon-induced protein with tetratricopeptide repeats 1B           | 3.2180007 up |
| EXOC8     | NM_175876    | exocyst complex component 8                                            | 2.1484337 up |
| FAM125A   | XR_111839    | family with sequence similarity 125, member A                          | 2.2122724 up |
| BMPR2     | NM_001204    | bone morphogenetic protein receptor, type II (serine/threonine kinase) | 2.355234 up  |
| JMY       | NM_152405    | junction mediating and regulatory protein, p53 cofactor                | 2.211525 up  |
| BPGM      | NM_199186    | 2,3-bisphosphoglycerate mutase                                         | 2.9273324 up |
| SSX2IP    | NM_014021    | synovial sarcoma, X breakpoint 2 interacting protein                   | 2.7748337 up |
| LOC729678 | NR_027183    | uncharacterized LOC729678                                              | 2.121622 up  |
| OBSL1     | NM_015311    | obscurin-like 1                                                        | 2.6144726 up |
| LEKR1     | AK094480     | leucine, glutamate and lysine rich 1                                   | 3.026911 up  |
| PLCL2     | NM_015184    | phospholipase C-like 2                                                 | 2.233596 up  |
| OR4D1     | NM_012374    | olfactory receptor, family 4, subfamily D, member 1                    | 3.1983545 up |
| AHRR      | NM_020731    | aryl-hydrocarbon receptor repressor                                    | 4.9523463 up |
| GJA10     | NM_032602    | gap junction protein, alpha 10, 62kDa                                  | 2.4125774 up |
| MRGPRX2   | NM_054030    | MAS-related GPR, member X2                                             | 3.2090268 up |
| CPB2      | NM_016413    | carboxypeptidase B2 (plasma)                                           | 3.2224495 up |
| CCP110    | NM_014711    | centriolar coiled coil protein 110kDa                                  | 2.1312978 up |
| TMEM202   | NM_001080462 | transmembrane protein 202                                              | 3.7996936 up |
| NSUN3     | NM_022072    | NOP2/Sun domain family, member 3                                       | 2.3972085 up |
| SGTB      | NM_019072    | small glutamine-rich tetratricopeptide repeat (TPR)-containing, beta   | 2.080579 up  |
| PGM3      | NM_015599    | phosphoglucomutase 3                                                   | 2.1007688 up |
| TMEM63A   | NM_014698    | transmembrane protein 63A                                              | 2.4857924 up |
| TMEM220   | NM_001004313 | transmembrane protein 220                                              | 3.3820732 up |
| TSC2D2    | NM_014779    | TSC22 domain family, member 2                                          | 2.316937 up  |
| C3orf55   | NM_001243729 | chromosome 3 open reading frame 55                                     | 2.1544988 up |
| SCAMP1    | NM_004866    | secretory carrier membrane protein 1                                   | 2.1405213 up |
| VMA21     | NM_001017980 | VMA21 vacuolar H <sup>+</sup> -ATPase homolog ( <i>S. cerevisiae</i> ) | 2.0026705 up |
| KRTAP19-2 | NM_181608    | keratin associated protein 19-2                                        | 3.180922 up  |
|           |              |                                                                        | 3.7708602 up |
| DPY19L2   | NM_173812    | dpy-19-like 2 ( <i>C. elegans</i> )                                    | 2.218427 up  |
| CTSL2     | NM_001333    | cathepsin L2                                                           | 2.8008616 up |
| LOC199897 | XM_001718592 | uncharacterized LOC199897                                              | 2.5137637 up |
| MOSPD1    | NM_019556    | motile sperm domain containing 1                                       | 2.2056162 up |
| HNRNPH1   | NM_005520    | heterogeneous nuclear ribonucleoprotein H1 (H)                         | 2.1390495 up |

|          |              |                                                                                 |              |
|----------|--------------|---------------------------------------------------------------------------------|--------------|
| FBXO24   | NM_033506    | F-box protein 24                                                                | 3.42086 up   |
| L3MBTL3  | NM_032438    | l(3)mbt-like 3 (Drosophila)                                                     | 2.725612 up  |
| ARHGAP28 | NM_001010000 | Rho GTPase activating protein 28                                                | 3.630918 up  |
| CCT6B    | NM_006584    | chaperonin containing TCP1, subunit 6B (zeta 2)                                 | 2.0370011 up |
| NCS1     | NM_014286    | neuronal calcium sensor 1                                                       | 2.0359647 up |
| SBF2     | NM_030962    | SET binding factor 2                                                            | 2.0668836 up |
| SHOC2    | NM_007373    | soc-2 suppressor of clear homolog (C. elegans)                                  | 2.1174717 up |
| CDADC1   | NM_030911    | cytidine and dCMP deaminase domain containing 1                                 | 2.978757 up  |
| GCG      | NM_002054    | glucagon                                                                        | 2.2334974 up |
| AKAP2    | NM_001004065 | A kinase (PRKA) anchor protein 2                                                | 2.231729 up  |
| TGM2     | NM_198951    | transglutaminase 2 (C polypeptide, protein-glutamine-gamma-glutamyltransferase) | 2.7073684 up |
| DNAAF1   | NM_178452    | dynein, axonemal, assembly factor 1                                             | 2.1368246 up |
| WDR43    | NM_015131    | WD repeat domain 43                                                             | 2.169946 up  |
| SLAIN2   | NM_020846    | SLAIN motif family, member 2                                                    | 2.322515 up  |
| ARHGAP18 | NM_033515    | Rho GTPase activating protein 18                                                | 2.1493456 up |
| CBX1     | NM_006807    | chromobox homolog 1                                                             | 2.0253344 up |
| FABP4    | NM_001442    | fatty acid binding protein 4, adipocyte                                         | 2.1605802 up |
| SLC25A26 | NM_173471    | solute carrier family 25, member 26                                             | 2.3715482 up |
| AMD1     | NM_001634    | adenosylmethionine decarboxylase 1                                              | 2.2836063 up |

---
