# Supplementary material for: Transcriptional signature associated with early rheumatoid arthritis and healthy individuals at high risk to develop the disease
Source: PubMed Central journal article supplement (PMC5870959; doi:10.1371/journal.pone.0194205), 2018-03-27
Supplement: pone.0194205.s003.pdf [file pone.0194205.s003.pdf]

**Supplementary Table 3. Down regulated genes in patients with RA vs relatives ACCP-**

| Gene Symbol  | Genbank Accession | Gene Name                                                                 | Fold Change | Regulation |
|--------------|-------------------|---------------------------------------------------------------------------|-------------|------------|
| FGF6         | NM_020996         | fibroblast growth factor 6                                                | -2.4612348  | down       |
| DCDC1        | NM_181807         | doublecortin domain containing 1                                          | -5.908167   | down       |
| RSPH1        | NM_080860         | radial spoke head 1 homolog (Chlamydomonas)                               | -2.359272   | down       |
| IZUMO2       | NM_152358         | IZUMO family member 2                                                     | -2.1440845  | down       |
|              |                   |                                                                           | -3.5735257  | down       |
| FAM205B      | AL080137          | transmembrane protein C9orf144B pseudogene                                | -3.9766746  | down       |
| C1orf226     | NM_001085375      | chromosome 1 open reading frame 226                                       | -2.8179643  | down       |
| LOC201617    | NR_038221         | uncharacterized LOC201617                                                 | -2.27644    | down       |
| RBMS3        | NM_014483         | RNA binding motif, single stranded interacting protein 3                  | -2.1848514  | down       |
| C7orf45      | NM_145268         | chromosome 7 open reading frame 45                                        | -2.457924   | down       |
| LOC100128402 | AK124574          | uncharacterized LOC100128402                                              | -3.337858   | down       |
| IPO7         | NM_006391         | importin 7                                                                | -2.0830383  | down       |
| ETV2         | NM_014209         | ets variant 2                                                             | -2.1907458  | down       |
| FOXF1        | NM_001451         | forkhead box F1                                                           | -2.2418375  | down       |
| CKAR         | NM_000730         | cholecystokinin A receptor                                                | -2.1643167  | down       |
|              |                   |                                                                           | -2.3475528  | down       |
| NBPF15       | NM_001170755      | neuroblastoma breakpoint family, member 15                                | -2.9943056  | down       |
| KDEL3        | NM_016657         | KDEL (Lys-Asp-Glu-Leu) endoplasmic reticulum protein retention receptor 3 | -2.1010847  | down       |
| CLDND2       | NM_152353         | claudin domain containing 2                                               | -2.2147286  | down       |
|              | DR007925          |                                                                           | -3.0071445  | down       |
| C1S          | NM_201442         | complement component 1, s subcomponent                                    | -2.2595763  | down       |
| CYP27B1      | NM_000785         | cytochrome P450, family 27, subfamily B, polypeptide 1                    | -2.2186098  | down       |
| RIIAD1       | NM_001144956      | regulatory subunit of type II PKA R-subunit (RIIa) domain containing 1    | -2.486339   | down       |
| LARP6        | NM_197958         | La ribonucleoprotein domain family, member 6                              | -3.1811519  | down       |
| STYXL1       | NM_016086         | serine/threonine/tyrosine interacting-like 1                              | -2.2973912  | down       |
| GRP          | NM_002091         | gastrin-releasing peptide                                                 | -2.2236316  | down       |
| GPR135       | NM_022571         | G protein-coupled receptor 135                                            | -2.2938108  | down       |
| FAM75D3      | NM_207416         | family with sequence similarity 75, member D3                             | -2.0161974  | down       |
| IDO1         | NM_002164         | indoleamine 2,3-dioxygenase 1                                             | -2.333675   | down       |
| GHRHR        | NM_000823         | growth hormone releasing hormone receptor                                 | -2.1087446  | down       |
| ARHGAP33     | NM_052948         | Rho GTPase activating protein 33                                          | -2.0564446  | down       |
| PGPEP1L      | NM_001167902      | pyroglutamyl-peptidase I-like                                             | -3.1144521  | down       |
|              |                   |                                                                           | -2.114345   | down       |
|              |                   |                                                                           | -2.061469   | down       |
|              | BX107671          |                                                                           | -2.2888033  | down       |
| HRASLS5      | NM_054108         | HRAS-like suppressor family, member 5                                     | -3.3872874  | down       |
| DEFB103A     | NM_001081551      | defensin, beta 103A                                                       | -2.1911187  | down       |

|              |              |                                                                                     |                 |
|--------------|--------------|-------------------------------------------------------------------------------------|-----------------|
| PLEKHD1      | NM_001161498 | pleckstrin homology domain containing, family D (with coiled-coil domains) member 1 | -2.6186786 down |
| LCE2C        | NM_178429    | late cornified envelope 2C                                                          | -2.5052247 down |
| TAS2R14      | NM_023922    | taste receptor, type 2, member 14                                                   | -2.5433955 down |
| MYO15B       | BC128044     | myosin XVB pseudogene                                                               | -4.016065 down  |
| ASAP3        | NM_017707    | ArfGAP with SH3 domain, ankyrin repeat and PH domain 3                              | -2.8068252 down |
| LOC442028    | NR_037597    | uncharacterized LOC442028                                                           | -2.8493435 down |
|              |              |                                                                                     | -2.9503536 down |
|              |              |                                                                                     | -4.625366 down  |
| TBX6         | NM_004608    | T-box 6                                                                             | -6.1043735 down |
| HS3ST4       | NM_006040    | heparan sulfate (glucosamine) 3-O-sulfotransferase 4                                | -2.0810814 down |
| NGEF         | NM_019850    | neuronal guanine nucleotide exchange factor                                         | -4.2346206 down |
|              |              |                                                                                     | -2.5424607 down |
| GTF2IRD1     | NM_005685    | GTF2I repeat domain containing 1                                                    | -3.1708293 down |
| SOST         | NM_025237    | sclerostin                                                                          | -3.002744 down  |
| FLJ40292     | NR_024341    | uncharacterized LOC643210                                                           | -2.1003883 down |
| KCNC1        | NM_004976    | potassium voltage-gated channel, Shaw-related subfamily, member 1                   | -2.2664573 down |
|              |              |                                                                                     | -3.8360286 down |
|              | X13953       |                                                                                     | -3.1475484 down |
| POU3F2       | NM_005604    | POU class 3 homeobox 2                                                              | -2.2795503 down |
| KRT79        | NM_175834    | keratin 79                                                                          | -2.656418 down  |
| SCARF2       | NM_153334    | scavenger receptor class F, member 2                                                | -2.2257302 down |
| LOC100133331 | NR_028327    | uncharacterized LOC100133331                                                        | -3.773689 down  |
|              |              |                                                                                     | -3.9486558 down |
| LOC145694    | XR_109210    | uncharacterized LOC145694                                                           | -2.4219522 down |
| INHBA        | NM_002192    | inhibin, beta A                                                                     | -4.1262827 down |
| TERT         | NM_198253    | telomerase reverse transcriptase                                                    | -3.9636452 down |
| CCL1         | NM_002981    | chemokine (C-C motif) ligand 1                                                      | -2.4017992 down |
| RARRES2      | NM_002889    | retinoic acid receptor responder (tazarotene induced) 2                             | -4.8614817 down |
| RPS26        | NM_001029    | ribosomal protein S26                                                               | -2.5013144 down |
| SRL          | NM_001098814 | sarcalumenin                                                                        | -2.1878123 down |
| LOC729668    | NR_003524    | golgi autoantigen, golgin subfamily a, 6 pseudogene                                 | -3.2774725 down |
| UGT2B11      | NM_001073    | UDP glucuronosyltransferase 2 family, polypeptide B11                               | -6.346666 down  |
| SSX2         | NM_175698    | synovial sarcoma, X breakpoint 2                                                    | -2.273672 down  |
| RDM1         | NM_001034836 | RAD52 motif 1                                                                       | -2.9162483 down |
| THBS2        | NM_003247    | thrombospondin 2                                                                    | -2.9432383 down |
| WTH3DI       | NM_001077637 | RAB6C-like                                                                          | -3.3727872 down |
| DCST1        | NM_152494    | DC-STAMP domain containing 1                                                        | -2.4203007 down |
|              |              |                                                                                     | -2.901084 down  |
| MUC17        | NM_001040105 | mucin 17, cell surface associated                                                   | -2.5495353 down |
|              |              |                                                                                     | -3.2851312 down |

|              |              |                                                                            |                 |
|--------------|--------------|----------------------------------------------------------------------------|-----------------|
|              |              |                                                                            | -7.0911107 down |
| DPCR1        | NM_080870    | diffuse panbronchiolitis critical region 1                                 | -5.749843 down  |
|              | BC101978     |                                                                            | -2.9334037 down |
| CNIH2        | NM_182553    | cornichon homolog 2 (Drosophila)                                           | -2.1542048 down |
|              |              |                                                                            | -2.005743 down  |
| SLC35G5      | NM_054028    | solute carrier family 35, member G5                                        | -3.3485498 down |
|              | XR_108874    |                                                                            | -2.557444 down  |
|              | AK025047     |                                                                            | -2.2335503 down |
| LOC285484    | NR_037863    | uncharacterized LOC285484                                                  | -2.2150912 down |
|              |              |                                                                            | -2.0048096 down |
| MYPN         | NM_032578    | myopalladin                                                                | -2.060425 down  |
|              | BC031250     |                                                                            | -4.2014008 down |
|              | DA144211     |                                                                            | -2.0575192 down |
| PLEC         | NM_201380    | plectin                                                                    | -2.3104613 down |
| CALCR        | NM_001164737 | calcitonin receptor                                                        | -3.1915514 down |
| KANK1        | AL832454     | KN motif and ankyrin repeat domains 1                                      | -2.398038 down  |
| PTCH2        |              | patched 2                                                                  | -4.3255506 down |
| MAST4        | AK299538     | microtubule associated serine/threonine kinase family member 4             | -7.23512 down   |
| RLN3         | NM_080864    | relaxin 3                                                                  | -2.0871866 down |
| ULBP3        | NM_024518    | UL16 binding protein 3                                                     | -2.414395 down  |
| LOC100132774 | NR_033827    | uncharacterized LOC100132774                                               | -3.0804498 down |
| GABRB1       | NM_000812    | gamma-aminobutyric acid (GABA) A receptor, beta 1                          | -2.02682 down   |
| DLG4         | NM_001365    | discs, large homolog 4 (Drosophila)                                        | -2.8535936 down |
| KRT33B       | NM_002279    | keratin 33B                                                                | -3.0449245 down |
|              |              |                                                                            | -2.5631251 down |
|              |              |                                                                            | -3.190821 down  |
|              | XM_002344257 |                                                                            | -4.031147 down  |
| FLJ25758     | NR_024372    | uncharacterized locus FLJ25758                                             | -2.172661 down  |
| CEACAM16     | NM_001039213 | carcinoembryonic antigen-related cell adhesion molecule 16                 | -2.5336459 down |
| LOC100130930 | AK126579     | uncharacterized LOC100130930                                               | -2.7929077 down |
| CYP4F2       | NM_001082    | cytochrome P450, family 4, subfamily F, polypeptide 2                      | -3.4355886 down |
| ZNF746       | NM_152557    | zinc finger protein 746                                                    | -2.468108 down  |
| FLJ39653     | BC132927     | uncharacterized FLJ39653                                                   | -2.1538723 down |
| GOLGA8F      | NR_033351    | golgin A8 family, member F                                                 | -3.772159 down  |
| IQSEC3       | BC024764     | IQ motif and Sec7 domain 3                                                 | -2.3883328 down |
|              | AK131313     |                                                                            | -2.7875314 down |
| SCARA5       | AY337579     | scavenger receptor class A, member 5 (putative)                            | -2.2809887 down |
| TMEM146      | NM_152784    | transmembrane protein 146                                                  | -2.8033879 down |
| GRIK3        | NM_000831    | glutamate receptor, ionotropic, kainate 3                                  | -2.8780453 down |
| EMR4P        | NR_024075    | egf-like module containing, mucin-like, hormone receptor-like 4 pseudogene | -3.8318007 down |

|              |              |                                                          |                 |
|--------------|--------------|----------------------------------------------------------|-----------------|
|              | AK128867     |                                                          | -2.339463 down  |
| LOC399875    | BC040220     | uncharacterized LOC399875                                | -3.5178869 down |
| DKK4         | NM_014420    | dickkopf homolog 4 ( <i>Xenopus laevis</i> )             | -2.437393 down  |
| CSMD2        | NM_052896    | CUB and Sushi multiple domains 2                         | -2.3411067 down |
| LOC100128348 | AK128128     | uncharacterized LOC100128348                             | -3.5356994 down |
|              |              |                                                          | -2.6931462 down |
| P2RX2        | NM_170683    | purinergic receptor P2X, ligand-gated ion channel, 2     | -2.557772 down  |
|              |              |                                                          | -2.678121 down  |
| LOC100128869 | XM_001719518 | uncharacterized LOC100128869                             | -3.5131736 down |
| KCTD11       | NM_001002914 | potassium channel tetramerisation domain containing 11   | -2.2699606 down |
|              | AF072164     |                                                          | -4.9391103 down |
| TCHHL1       | NM_001008536 | trichohyalin-like 1                                      | -2.0612605 down |
| LOC728503    | XM_001127575 | uncharacterized LOC728503                                | -4.228413 down  |
| GATA4        | NM_002052    | GATA binding protein 4                                   | -2.033399 down  |
| LOC100133131 | AF289593     | uncharacterized LOC100133131                             | -3.0451298 down |
| LOC729159    | XM_001129515 | UPF0607 protein ENSP00000381418-like                     | -2.8732407 down |
|              |              |                                                          | -2.1575031 down |
| OTOP1        | NM_177998    | otopetrin 1                                              | -2.1152172 down |
| OR2C1        | NM_012368    | olfactory receptor, family 2, subfamily C, member 1      | -2.673744 down  |
|              |              |                                                          | -4.1162167 down |
| LOC389834    | NR_027420    | ankyrin repeat domain 57 pseudogene                      | -2.426158 down  |
| CDX2         | NM_001265    | caudal type homeobox 2                                   | -2.2728572 down |
| DNM1P46      | NR_003260    | DNM1 pseudogene 46                                       | -2.2783635 down |
| GPAT2        | NM_207328    | glycerol-3-phosphate acyltransferase 2, mitochondrial    | -2.6531255 down |
| HABP2        | NM_004132    | hyaluronan binding protein 2                             | -2.9742222 down |
| LOC100130093 | NR_024485    | uncharacterized LOC100130093                             | -2.198175 down  |
| LOC100129393 | AK124631     | uncharacterized LOC100129393                             | -3.2786276 down |
| DNAH17       | NM_173628    | dynein, axonemal, heavy chain 17                         | -2.5355463 down |
|              | AF289615     |                                                          | -2.060981 down  |
| FAM106CP     | NR_026810    | family with sequence similarity 106, member C pseudogene | -2.1905699 down |
| DNPEP        | NM_012100    | aspartyl aminopeptidase                                  | -2.3839345 down |
|              |              |                                                          | -2.4030042 down |
| LOC283728    | AK095617     | uncharacterized LOC283728                                | -3.7149692 down |
| TRIM36       | BC017346     | tripartite motif containing 36                           | -5.316765 down  |
| DDX3Y        | NM_001122665 | DEAD (Asp-Glu-Ala-Asp) box polypeptide 3, Y-linked       | -2.8573813 down |
| LOC729305    | XR_132809    | uncharacterized LOC729305                                | -5.7991824 down |
| FOXI2        | NM_207426    | forkhead box I2                                          | -2.0110466 down |
| C13orf33     | NM_032849    | chromosome 13 open reading frame 33                      | -2.6747673 down |
| LOC100132247 | NM_001135865 | nuclear pore complex interacting protein related gene    | -2.2041225 down |
|              |              |                                                          | -2.0018158 down |
| FREM2        | NM_207361    | FRAS1 related extracellular matrix protein 2             | -2.993317 down  |

|              |              |                                                                       |                 |
|--------------|--------------|-----------------------------------------------------------------------|-----------------|
| CHRM5        | NM_012125    | cholinergic receptor, muscarinic 5                                    | -2.0895228 down |
|              | AK124041     |                                                                       | -2.1995711 down |
| LOC389332    | NR_024418    | uncharacterized LOC389332                                             | -2.1874394 down |
| RNU105A      | NR_004404    | RNA, U105A small nucleolar                                            | -2.374022 down  |
|              | XM_001717980 |                                                                       | -3.5069368 down |
| GINS2        | NM_016095    | GINS complex subunit 2 (Psf2 homolog)                                 | -8.626691 down  |
| TPD52L1      | NM_001003395 | tumor protein D52-like 1                                              | -2.068876 down  |
|              |              |                                                                       | -2.7930276 down |
| SERPINB3     | NM_006919    | serpin peptidase inhibitor, clade B (ovalbumin), member 3             | -2.4826992 down |
| GABRQ        | NM_018558    | gamma-aminobutyric acid (GABA) receptor, theta                        | -2.6876967 down |
| RASSF4       |              | Ras association (RalGDS/AF-6) domain family member 4                  | -2.224959 down  |
| DOC2B        | NM_003585    | double C2-like domains, beta                                          | -2.4832351 down |
|              | AK025312     |                                                                       | -2.0665631 down |
| HRASLS2      | NM_017878    | HRAS-like suppressor 2                                                | -2.728009 down  |
| IL36G        | NM_019618    | interleukin 36, gamma                                                 | -2.6372962 down |
| AKAP4        | NM_003886    | A kinase (PRKA) anchor protein 4                                      | -2.4355173 down |
| PRR7         | AK125417     | proline rich 7 (synaptic)                                             | -4.424351 down  |
| LOC728671    | XM_001128100 | uncharacterized LOC728671                                             | -5.382475 down  |
| LOC642852    | NR_026943    | uncharacterized LOC642852                                             | -3.6159494 down |
| PCDHB11      | NM_018931    | protocadherin beta 11                                                 | -2.79214 down   |
| C5orf64      | NM_173667    | chromosome 5 open reading frame 64                                    | -4.768939 down  |
| LINGO2       | NM_152570    | leucine rich repeat and Ig domain containing 2                        | -4.4788895 down |
| NUDT8        | NM_001243750 | nudix (nucleoside diphosphate linked moiety X)-type motif 8           | -3.5824828 down |
|              |              |                                                                       | -7.947017 down  |
| AOC4         | NR_002773    | AOC3 pseudogene                                                       | -4.0430007 down |
| RNU4ATAC     | DW419002     | RNA, U4atac small nuclear (U12-dependent splicing)                    | -2.3195674 down |
| MCART1       | NR_024872    | mitochondrial carrier triple repeat 1                                 | -2.30282 down   |
| LOC100128657 | XR_132562    | coiled-coil-helix-coiled-coil-helix domain containing 4 pseudogene    | -2.5478723 down |
|              | Z18843       |                                                                       | -2.5708065 down |
|              |              |                                                                       | -2.689854 down  |
| LOC729966    | NR_036575    | uncharacterized LOC729966                                             | -2.4443069 down |
| LOC100132686 | BC020894     | uncharacterized LOC100132686                                          | -2.4803283 down |
| NR2E3        | NM_014249    | nuclear receptor subfamily 2, group E, member 3                       | -2.0687454 down |
| LRRC37BP1    | AK125981     | leucine rich repeat containing 37B pseudogene 1                       | -2.5252504 down |
| ATP8B3       | NM_138813    | ATPase, aminophospholipid transporter, class I, type 8B, member 3     | -2.2276285 down |
|              | AK057820     |                                                                       | -3.4689136 down |
| ZNF562       | NM_017656    | zinc finger protein 562                                               | -2.0377355 down |
| POMZP3       | NM_152992    | POM121 and ZP3 fusion                                                 | -2.5042193 down |
| GGA1         |              | golgi-associated, gamma adaptin ear containing, ARF binding protein 1 | -2.6645577 down |
| CYP3A4       | NM_017460    | cytochrome P450, family 3, subfamily A, polypeptide 4                 | -2.4023285 down |
| LAMB1        | BC044633     | laminin, beta 1                                                       | -2.4714444 down |

|              |              |                                                                                                                                                |                 |
|--------------|--------------|------------------------------------------------------------------------------------------------------------------------------------------------|-----------------|
| GPR35        | NM_001195381 | G protein-coupled receptor 35                                                                                                                  | -2.187888 down  |
| COPE         | AK023303     | coatamer protein complex, subunit epsilon<br>myeloid/lymphoid or mixed-lineage leukemia (trithorax homolog, Drosophila);<br>translocated to, 4 | -2.519379 down  |
| MLLT4        | NM_001207008 |                                                                                                                                                | -3.0376167 down |
| LOC144817    | NR_038433    | uncharacterized LOC144817                                                                                                                      | -2.9228003 down |
| SERTM1       | NM_203451    | serine-rich and transmembrane domain containing 1                                                                                              | -3.9387424 down |
| IGFL3        | NM_207393    | IGF-like family member 3                                                                                                                       | -4.200748 down  |
| C19orf55     | NM_001039887 | chromosome 19 open reading frame 55                                                                                                            | -2.3949616 down |
|              | BM477328     |                                                                                                                                                | -2.3815846 down |
| BMP15        | NM_005448    | bone morphogenetic protein 15                                                                                                                  | -2.9643145 down |
| ZNF705A      | NM_001004328 | zinc finger protein 705A                                                                                                                       | -2.8314395 down |
|              | AK024188     |                                                                                                                                                | -2.5607195 down |
|              | BX538057     |                                                                                                                                                | -2.7868655 down |
| SFRP1        | NM_003012    | secreted frizzled-related protein 1                                                                                                            | -3.3551188 down |
| PCDHGB7      | NM_032101    | protocadherin gamma subfamily B, 7                                                                                                             | -3.278794 down  |
| SH2D4A       | NM_022071    | SH2 domain containing 4A                                                                                                                       | -2.4754755 down |
| LOC572558    | NR_015423    | uncharacterized LOC572558                                                                                                                      | -2.2824948 down |
| LZTS2        | AK097997     | leucine zipper, putative tumor suppressor 2                                                                                                    | -2.420541 down  |
|              |              |                                                                                                                                                | -3.2616613 down |
| LOC729995    | XR_110198    | hCG1817208                                                                                                                                     | -2.5670633 down |
| LOC100129316 | NR_033912    | uncharacterized LOC100129316                                                                                                                   | -2.3271677 down |
| LOC100506533 | XM_003118505 | putative uncharacterized protein FLJ35883-like                                                                                                 | -2.8542833 down |
| LOC389043    | NR_036499    | uncharacterized LOC389043                                                                                                                      | -2.151608 down  |
| PLAGL2       | NM_002657    | pleiomorphic adenoma gene-like 2                                                                                                               | -2.3623219 down |
| PPP1R26      | NM_014811    | protein phosphatase 1, regulatory subunit 26                                                                                                   | -2.507344 down  |
| MICU1        |              | mitochondrial calcium uptake 1                                                                                                                 | -2.1282022 down |
|              | DA734158     |                                                                                                                                                | -3.0927353 down |
| NRSN2        | NM_024958    | neurensin 2                                                                                                                                    | -2.9623015 down |
| PMFBP1       | NM_031293    | polyamine modulated factor 1 binding protein 1                                                                                                 | -2.312073 down  |
|              |              |                                                                                                                                                | -2.4092784 down |
| C20orf151    | NM_080833    | chromosome 20 open reading frame 151                                                                                                           | -2.3318949 down |
| KIFC2        | NM_145754    | kinesin family member C2                                                                                                                       | -3.0426295 down |
| NANOS2       | NM_001029861 | nanos homolog 2 (Drosophila)                                                                                                                   | -2.1999478 down |
| LAMC3        | NM_006059    | laminin, gamma 3                                                                                                                               | -4.0606203 down |
| LOC145837    | NR_026979    | uncharacterized LOC145837                                                                                                                      | -3.6114953 down |
| BARX2        | NM_003658    | BARX homeobox 2                                                                                                                                | -2.2483613 down |
| KYNU         |              | kynureninase                                                                                                                                   | -2.0048492 down |
| B3GNT8       | NM_198540    | UDP-GlcNAc:betaGal beta-1,3-N-acetylglucosaminyltransferase 8                                                                                  | -2.0302181 down |
| LOC254057    | AK024653     | uncharacterized LOC254057                                                                                                                      | -2.1027448 down |
|              |              |                                                                                                                                                | -3.454256 down  |
| LOC100128333 | AK127681     | uncharacterized LOC100128333                                                                                                                   | -2.4480226 down |

|              |              |                                                                              |                 |
|--------------|--------------|------------------------------------------------------------------------------|-----------------|
| INCENP       | NM_001040694 | inner centromere protein antigens 135/155kDa                                 | -2.3008037 down |
| MAGEB1       | NM_002363    | melanoma antigen family B, 1                                                 | -2.6537116 down |
| RXFP2        | NM_130806    | relaxin/insulin-like family peptide receptor 2                               | -2.364773 down  |
| COL13A1      | NM_080801    | collagen, type XIII, alpha 1                                                 | -2.4663982 down |
| LOC100190940 | NR_024457    | uncharacterized LOC100190940                                                 | -2.2174277 down |
|              |              |                                                                              | -4.6378016 down |
| NODAL        | NM_018055    | nodal homolog (mouse)                                                        | -3.1945043 down |
|              |              |                                                                              | -2.900224 down  |
|              | XM_003118552 |                                                                              | -6.7279897 down |
| CYP7A1       | NM_000780    | cytochrome P450, family 7, subfamily A, polypeptide 1                        | -2.5759485 down |
| C3orf35      | NM_178339    | chromosome 3 open reading frame 35                                           | -2.1795719 down |
|              |              |                                                                              | -2.8362055 down |
|              | AK098235     |                                                                              | -2.2333887 down |
| ZNF280A      | NM_080740    | zinc finger protein 280A                                                     | -2.409288 down  |
| GSG1         | NM_001080554 | germ cell associated 1                                                       | -5.013273 down  |
|              | AF090909     |                                                                              | -3.1378796 down |
| CYTL1        | NM_018659    | cytokine-like 1                                                              | -2.2124548 down |
| C15orf60     | NM_001042367 | chromosome 15 open reading frame 60                                          | -2.0673096 down |
|              | CR989582     |                                                                              | -2.0196733 down |
| LOC392364    | NR_040117    | chromosome 15 open reading frame 2 pseudogene                                | -2.0676107 down |
| IL36A        | NM_014440    | interleukin 36, alpha                                                        | -2.8281875 down |
| LOC389834    | NR_027420    | ankyrin repeat domain 57 pseudogene                                          | -2.187541 down  |
| AOX1         | NM_001159    | aldehyde oxidase 1                                                           | -2.6017566 down |
|              |              |                                                                              | -2.4459352 down |
| MLL5         | NM_182931    | myeloid/lymphoid or mixed-lineage leukemia 5 (trithorax homolog, Drosophila) | -2.8510187 down |
| AVPR2        | NM_000054    | arginine vasopressin receptor 2                                              | -2.8083498 down |
| C11orf52     | NM_080659    | chromosome 11 open reading frame 52                                          | -3.7092638 down |
|              |              |                                                                              | -2.9572113 down |
| LINC00467    | NR_026761    | long intergenic non-protein coding RNA 467                                   | -3.2555642 down |
|              |              |                                                                              | -2.092665 down  |
|              | AK024162     |                                                                              | -5.4059706 down |
| SRRM3        | NM_001110199 | serine/arginine repetitive matrix 3                                          | -3.6287715 down |
| ELK4         | NM_021795    | ELK4, ETS-domain protein (SRF accessory protein 1)                           | -2.4673357 down |
| GGT8P        | NR_003503    | gamma-glutamyltransferase 8 pseudogene                                       | -4.8570437 down |
| GRIA3        | NM_000828    | glutamate receptor, ionotropic, AMPA 3                                       | -3.609577 down  |
| LOC80054     | NR_026887    | uncharacterized LOC80054                                                     | -2.1593254 down |
| S100A14      | NM_020672    | S100 calcium binding protein A14                                             | -4.210981 down  |
| RAPGEF3      | U78169       | Rap guanine nucleotide exchange factor (GEF) 3                               | -2.2429178 down |
| LRP2         | NM_004525    | low density lipoprotein receptor-related protein 2                           | -10.938198 down |
| OR52I2       | NM_001005170 | olfactory receptor, family 52, subfamily I, member 2                         | -2.2155972 down |

|              |              |                                                                         |                 |
|--------------|--------------|-------------------------------------------------------------------------|-----------------|
|              |              |                                                                         | -2.5089257 down |
|              |              |                                                                         | -4.0312285 down |
| COL27A1      | BC007696     | collagen, type XXVII, alpha 1                                           | -2.0218265 down |
| LOC339316    | BC043286     | uncharacterized LOC339316                                               | -2.3005366 down |
| LRPPRC       | NM_133259    | leucine-rich PPR-motif containing                                       | -3.1235523 down |
| FOXQ1        | NM_033260    | forkhead box Q1                                                         | -3.5405126 down |
| KCNA7        | NM_031886    | potassium voltage-gated channel, shaker-related subfamily, member 7     | -2.1563544 down |
| SLC24A5      | NM_205850    | solute carrier family 24, member 5                                      | -5.512019 down  |
| ACTN4        | NM_004924    | actinin, alpha 4                                                        | -2.0808754 down |
|              |              |                                                                         | -3.6623635 down |
| LOC100131107 | XM_001715471 | UPF0607 protein ENSP00000383783-like                                    | -2.9852264 down |
|              |              |                                                                         | -2.290563 down  |
|              | DR007930     |                                                                         | -3.9309983 down |
| CACNA1B      |              | calcium channel, voltage-dependent, N type, alpha 1B subunit            | -2.0461526 down |
| PRSS56       | NM_001195129 | protease, serine, 56                                                    | -2.0246875 down |
|              | BC040680     |                                                                         | -2.9862437 down |
| GCNT4        | NM_016591    | glucosaminyl (N-acetyl) transferase 4, core 2                           | -2.5956194 down |
|              |              |                                                                         | -2.8009536 down |
| MDH1B        | NM_001039845 | malate dehydrogenase 1B, NAD (soluble)                                  | -2.4499521 down |
| GNA11        | NM_002067    | guanine nucleotide binding protein (G protein), alpha 11 (Gq class)     | -2.5387928 down |
| LOC151171    | NR_037809    | uncharacterized LOC151171                                               | -2.4732323 down |
| KCP          | NM_199349    | kielin/chordin-like protein                                             | -2.190662 down  |
| HCN3         | NM_020897    | hyperpolarization activated cyclic nucleotide-gated potassium channel 3 | -2.6795626 down |
| NXF5         | NM_032946    | nuclear RNA export factor 5                                             | -2.1164608 down |
|              | AK126351     |                                                                         | -3.5204198 down |
|              |              |                                                                         | -3.6131644 down |
| ATP10D       | NM_020453    | ATPase, class V, type 10D                                               | -2.5520403 down |
| MAGEA2B      | NM_153488    | melanoma antigen family A, 2B                                           | -3.4460616 down |
| CCDC60       | NM_178499    | coiled-coil domain containing 60                                        | -3.1452763 down |
| C8orf71      | NR_026772    | chromosome 8 open reading frame 71                                      | -3.3366601 down |
| PTK6         | NM_005975    | PTK6 protein tyrosine kinase 6                                          | -4.342905 down  |
| FAM71A       | NM_153606    | family with sequence similarity 71, member A                            | -2.6628368 down |
| RASSF6       | NM_201431    | Ras association (RalGDS/AF-6) domain family member 6                    | -3.694323 down  |
| AGAP1        | NM_001037131 | ArfGAP with GTPase domain, ankyrin repeat and PH domain 1               | -3.9957428 down |
|              |              |                                                                         | -2.6536207 down |
| TPD52        | XM_001716081 | tumor protein D52                                                       | -2.0229888 down |
| ARHGAP44     | NM_014859    | Rho GTPase activating protein 44                                        | -2.3134844 down |
|              |              |                                                                         | -2.7637691 down |
| LOC400743    | AK127830     | uncharacterized LOC400743                                               | -3.1892774 down |
| TSPAN14      | NM_030927    | tetraspanin 14                                                          | -2.2708437 down |
| GAGE7        | NM_021123    | G antigen 7                                                             | -4.559126 down  |



|              |              |                                                                                |                 |
|--------------|--------------|--------------------------------------------------------------------------------|-----------------|
| TTC30A       | NM_152275    | tetratricopeptide repeat domain 30A                                            | -2.0577908 down |
|              |              |                                                                                | -2.0418484 down |
|              |              |                                                                                | -3.1730504 down |
|              |              |                                                                                | -6.8913774 down |
| LAT2         | BC006080     | linker for activation of T cells family, member 2                              | -3.0589664 down |
|              |              |                                                                                | -3.1212816 down |
| LOC100134040 | AL162052     | uncharacterized LOC100134040                                                   | -3.6147633 down |
| LOC647070    | AK001442     | uncharacterized LOC647070                                                      | -2.4439862 down |
| AFF3         |              | AF4/FMR2 family, member 3                                                      | -2.695566 down  |
| C1orf51      | NM_144697    | chromosome 1 open reading frame 51                                             | -2.4202318 down |
| CSR2         | NM_001321    | cysteine and glycine-rich protein 2                                            | -22.980167 down |
| MDM4         | NM_001204171 | Mdm4 p53 binding protein homolog (mouse)                                       | -3.1185024 down |
| SLC38A1      | DC378344     | solute carrier family 38, member 1                                             | -2.378194 down  |
| S100A7       | NM_002963    | S100 calcium binding protein A7                                                | -2.3794377 down |
|              |              |                                                                                | -4.3220015 down |
|              | AK097471     |                                                                                | -3.5886817 down |
| OR51G1       | NM_001005237 | olfactory receptor, family 51, subfamily G, member 1                           | -2.8088446 down |
| LOC100128811 | NR_027333    | uncharacterized LOC100128811                                                   | -3.0326595 down |
| GOLGA6L5     | NR_003246    | golgin A6 family-like 5 (pseudogene)                                           | -4.1409206 down |
| MAEL         | NM_032858    | maelstrom homolog (Drosophila)                                                 | -2.2612245 down |
| S100A1       | NM_006271    | S100 calcium binding protein A1                                                | -2.3622494 down |
| LOC728339    | BC087857     | uncharacterized LOC728339                                                      | -2.338064 down  |
|              |              |                                                                                | -2.6913917 down |
| SOBP         | NM_018013    | sine oculis binding protein homolog (Drosophila)                               | -2.1060286 down |
| SH2D6        | BC110073     | SH2 domain containing 6                                                        | -2.6259198 down |
| ST8SIA1      | NM_003034    | ST8 alpha-N-acetyl-neuraminide alpha-2,8-sialyltransferase 1                   | -4.096914 down  |
| RPL23AP64    | NR_003040    | ribosomal protein L23a pseudogene 64                                           | -2.6580968 down |
| PRB4         | NM_002723    | proline-rich protein BstNI subfamily 4                                         | -2.559516 down  |
| DEPDC5       | NM_001007188 | DEP domain containing 5                                                        | -2.033664 down  |
| LOC158960    | CR613749     | uncharacterized protein BC009467                                               | -2.4126246 down |
| ANKRD13B     | NM_152345    | ankyrin repeat domain 13B                                                      | -5.5920157 down |
| TEX13A       | NM_031274    | testis expressed 13A                                                           | -2.1771133 down |
| WDR87        | NM_031951    | WD repeat domain 87                                                            | -6.350717 down  |
| TPTE2P3      | NR_002793    | transmembrane phosphoinositide 3-phosphatase and tensin homolog 2 pseudogene 3 | -2.8170989 down |
|              |              |                                                                                | -3.350116 down  |
| COL5A3       | NM_015719    | collagen, type V, alpha 3                                                      | -2.3167112 down |
| TULP1        | NM_003322    | tubby like protein 1                                                           | -2.0884333 down |
| TRPC2        | NR_002720    | transient receptor potential cation channel, subfamily C, member 2, pseudogene | -2.4366245 down |
| KRTAP4-2     | NM_033062    | keratin associated protein 4-2                                                 | -2.0248802 down |
| FTCD         | NM_206965    | formiminotransferase cyclodeaminase                                            | -2.5420594 down |

|              |              |                                                                                  |                 |
|--------------|--------------|----------------------------------------------------------------------------------|-----------------|
| LINC00371    | XR_132731    | long intergenic non-protein coding RNA 371                                       | -2.6738272 down |
| GAS2L2       | NM_139285    | growth arrest-specific 2 like 2                                                  | -2.6415405 down |
|              |              |                                                                                  | -2.568622 down  |
| ERF          | NM_006494    | Ets2 repressor factor                                                            | -2.1893613 down |
| OR5F1        | NM_003697    | olfactory receptor, family 5, subfamily F, member 1                              | -2.3779263 down |
| NEK10        | AK057247     | NIMA (never in mitosis gene a)- related kinase 10                                | -2.1835463 down |
|              |              |                                                                                  | -2.1255703 down |
| DUOXA1       | EU927394     | dual oxidase maturation factor 1                                                 | -3.0396867 down |
| USP17L2      | NM_201402    | ubiquitin specific peptidase 17-like 2                                           | -2.5991228 down |
| LOC100131581 | AK092544     | uncharacterized LOC100131581                                                     | -8.233938 down  |
| RAX          | NM_013435    | retina and anterior neural fold homeobox                                         | -2.3905017 down |
| CSTL1        | NM_138283    | cystatin-like 1                                                                  | -2.3075707 down |
| HECTD2       | NM_173497    | HECT domain containing 2                                                         | -2.4544797 down |
| VSTM2A       | NM_182546    | V-set and transmembrane domain containing 2A                                     | -2.1677985 down |
| COG4         | NM_001195139 | component of oligomeric golgi complex 4                                          | -3.183384 down  |
| ABCD3        | NM_001122674 | ATP-binding cassette, sub-family D (ALD), member 3                               | -2.609972 down  |
| GPR61        | NM_031936    | G protein-coupled receptor 61                                                    | -2.4386528 down |
| ZNF467       | NM_207336    | zinc finger protein 467                                                          | -2.057597 down  |
| LAMA5        | BC015386     | laminin, alpha 5                                                                 | -2.5294468 down |
|              |              |                                                                                  | -2.0559359 down |
| DISC1        | NM_001164550 | disrupted in schizophrenia 1                                                     | -4.0900855 down |
| LOC100130542 | AK127083     | uncharacterized LOC100130542                                                     | -2.8147304 down |
| KIAA1755     | NM_001029864 | KIAA1755                                                                         | -2.2032206 down |
|              | AK095621     |                                                                                  | -3.285275 down  |
|              |              |                                                                                  | -2.8335786 down |
| LOC100132249 | XR_132823    | uncharacterized LOC100132249                                                     | -2.9292002 down |
|              |              |                                                                                  | -6.4335713 down |
| LOC284551    | NR_027085    | uncharacterized LOC284551                                                        | -2.3071935 down |
| C6orf10      | NM_006781    | chromosome 6 open reading frame 10                                               | -2.1796014 down |
|              |              |                                                                                  | -4.9856873 down |
| TUBB8        | NM_177987    | tubulin, beta 8 class VIII                                                       | -3.1990798 down |
| KIR2DS4      | NM_012314    | killer cell immunoglobulin-like receptor, two domains, short cytoplasmic tail, 4 | -2.028281 down  |
| SLC9A3R2     | NM_004785    | solute carrier family 9 (sodium/hydrogen exchanger), member 3 regulator 2        | -2.225512 down  |
| MAP3K4       | NM_006724    | mitogen-activated protein kinase kinase kinase 4                                 | -2.7849026 down |
|              |              |                                                                                  | -2.9401739 down |
| TTY13        | NR_001537    | testis-specific transcript, Y-linked 13 (non-protein coding)                     | -2.388504 down  |
| OR51I2       | NM_001004754 | olfactory receptor, family 51, subfamily I, member 2                             | -2.84366 down   |
| CERCAM       | NM_016174    | cerebral endothelial cell adhesion molecule                                      | -7.717456 down  |
|              | XR_112969    |                                                                                  | -2.3091383 down |
| FAM5C        | NM_199051    | family with sequence similarity 5, member C                                      | -4.288718 down  |

|           |              |                                                                          |                 |
|-----------|--------------|--------------------------------------------------------------------------|-----------------|
| KLHL4     | NM_057162    | kelch-like 4 (Drosophila)                                                | -2.8599212 down |
|           |              |                                                                          | -4.3714232 down |
|           |              |                                                                          | -2.9069355 down |
| C1orf52   | NM_198077    | chromosome 1 open reading frame 52                                       | -2.9682403 down |
| KCNQ2     | AK293727     | potassium voltage-gated channel, KQT-like subfamily, member 2            | -2.6751084 down |
|           | AB305786     |                                                                          | -2.3179505 down |
| KIAA1161  | NM_020702    | KIAA1161                                                                 | -2.6965714 down |
| OR9G9     | NM_001013358 | olfactory receptor, family 9, subfamily G, member 9                      | -2.3524234 down |
| GDAP1L1   | NM_024034    | ganglioside-induced differentiation-associated protein 1-like 1          | -2.310358 down  |
| SCARNA5   | NR_003008    | small Cajal body-specific RNA 5                                          | -3.9698277 down |
| KRT6A     | NM_005554    | keratin 6A                                                               | -2.9003875 down |
|           |              |                                                                          | -3.1290665 down |
| ZNF526    | NM_133444    | zinc finger protein 526                                                  | -2.008108 down  |
| TMEM201   | NM_001130924 | transmembrane protein 201                                                | -2.8604376 down |
| XAGE-4    | XR_113307    | XAGE-4 protein                                                           | -2.8020458 down |
|           |              |                                                                          | -3.4956048 down |
| OR4F21    | NM_001005504 | olfactory receptor, family 4, subfamily F, member 21                     | -2.3006544 down |
|           |              |                                                                          | -2.1157777 down |
|           |              |                                                                          | -2.303116 down  |
|           |              |                                                                          | -2.5150135 down |
| BARHL2    | NM_020063    | BarH-like homeobox 2                                                     | -2.1635277 down |
| PCDHB2    | NM_018936    | protocadherin beta 2                                                     | -2.6112478 down |
| USP21     | NM_001014443 | ubiquitin specific peptidase 21                                          | -2.2606707 down |
| UPB1      | NM_016327    | ureidopropionase, beta                                                   | -2.5708623 down |
|           |              |                                                                          | -2.3648338 down |
| HMGA2     | NM_003484    | high mobility group AT-hook 2                                            | -2.9009023 down |
|           | CR936830     |                                                                          | -2.0233212 down |
| HNF1B     | NM_000458    | HNF1 homeobox B                                                          | -2.5154667 down |
| GSG1      | NM_031289    | germ cell associated 1                                                   | -2.3850048 down |
|           |              |                                                                          | -3.1702468 down |
| CALY      |              | calcyon neuron-specific vesicular protein                                | -2.565098 down  |
|           | AK074492     |                                                                          | -2.8202822 down |
| SLC16A13  | NM_201566    | solute carrier family 16, member 13 (monocarboxylic acid transporter 13) | -2.192794 down  |
| EPHB4     | NM_004444    | EPH receptor B4                                                          | -2.2023368 down |
| THBS3     | CR933610     | thrombospondin 3                                                         | -2.482915 down  |
| LOC389199 | XR_112616    | uncharacterized LOC389199                                                | -5.2141843 down |
| ACCN3     | NM_020322    | amiloride-sensitive cation channel 3                                     | -2.2609878 down |
| LOC285768 | NR_027115    | uncharacterized LOC285768                                                | -2.4689662 down |
| FLJ22184  | NM_001190467 | putative uncharacterized protein FLJ22184                                | -2.1675034 down |
|           | AK090448     |                                                                          | -4.2891116 down |

|              |              |                                                       |                 |
|--------------|--------------|-------------------------------------------------------|-----------------|
| GOLGA2       |              | golgin A2                                             | -2.2291768 down |
| COL6A2       | NM_058175    | collagen, type VI, alpha 2                            | -2.7809207 down |
|              | AK123308     |                                                       | -2.6206617 down |
| SORCS3       | NM_014978    | sortilin-related VPS10 domain containing receptor 3   | -2.0549405 down |
| LOC100130051 | AK127296     | uncharacterized LOC100130051                          | -2.2625854 down |
| NPIP         | NM_006985    | nuclear pore complex interacting protein              | -2.4956615 down |
| OR2T5        | NM_001004697 | olfactory receptor, family 2, subfamily T, member 5   | -2.167525 down  |
|              |              |                                                       | -2.1197217 down |
|              |              |                                                       | -2.175076 down  |
| LOC157273    | NR_040039    | uncharacterized LOC157273                             | -2.7618835 down |
|              | AK126938     |                                                       | -2.921644 down  |
| NNMT         | NM_006169    | nicotinamide N-methyltransferase                      | -2.921644 down  |
|              |              |                                                       | -13.12961 down  |
|              |              |                                                       | -2.3312879 down |
| LINC00310    | NR_027267    | long intergenic non-protein coding RNA 310            | -2.173869 down  |
| LPHN1        | NM_001008701 | latrophilin 1                                         | -2.173869 down  |
| ATPAF1-AS1   | NM_001145474 | ATPAF1 antisense RNA 1 (non-protein coding)           | -2.3900933 down |
|              |              |                                                       | -4.49347 down   |
|              |              |                                                       | -3.5526977 down |
| DEFB134      | NM_001033019 | defensin, beta 134                                    | -2.3584015 down |
| RETSAT       |              | retinol saturase (all-trans-retinol 13,14-reductase)  | -2.0712445 down |
| CYP4Z1       | NM_178134    | cytochrome P450, family 4, subfamily Z, polypeptide 1 | -2.0712445 down |
| C22orf34     | NR_026997    | chromosome 22 open reading frame 34                   | -2.041899 down  |
| FAM163B      | NM_001080515 | family with sequence similarity 163, member B         | -3.4166331 down |
| CDK18        | NM_212503    | cyclin-dependent kinase 18                            | -4.526807 down  |
|              |              |                                                       | -2.4427114 down |
|              |              |                                                       | -2.2805216 down |
| DEFB107A     | NM_001037668 | defensin, beta 107A                                   | -6.540771 down  |
| EMP2         | NM_001424    | epithelial membrane protein 2                         | -6.540771 down  |
| KRTAP10-6    | NM_198688    | keratin associated protein 10-6                       | -3.9792604 down |
|              |              |                                                       | -2.2442586 down |
|              |              |                                                       | -2.4281075 down |
| UFSP1        | NM_001015072 | UFM1-specific peptidase 1 (non-functional)            | -2.1328275 down |
| KLK13        | NM_015596    | kallikrein-related peptidase 13                       | -2.1328275 down |
| MOG          | NM_206809    | myelin oligodendrocyte glycoprotein                   | -2.421634 down  |
|              |              |                                                       | -2.8477802 down |
|              |              |                                                       | -2.42982 down   |
| FOXP3        | NM_014009    | forkhead box P3                                       | -2.1542158 down |
| IQCF2        | NM_203424    | IQ motif containing F2                                | -2.1542158 down |
| PCDHGB1      | NM_032095    | protocadherin gamma subfamily B, 1                    | -3.2830222 down |
| LOC100131742 | AK130172     | uncharacterized LOC100131742                          | -2.044309 down  |
|              |              |                                                       | -2.585999 down  |
|              |              |                                                       | -3.7484388 down |
| POTEM        | NM_001145442 | POTE ankyrin domain family, member M                  | -7.468435 down  |
| FOXA3        | NM_004497    | forkhead box A3                                       | -7.468435 down  |
| LINC00271    | NR_026805    | long intergenic non-protein coding RNA 271            | -2.5469534 down |
|              |              |                                                       | -2.036642 down  |
|              |              |                                                       | -3.0407228 down |

|              |              |                                                                                         |                 |
|--------------|--------------|-----------------------------------------------------------------------------------------|-----------------|
|              |              |                                                                                         | -2.9879882 down |
| MYBPC1       | NM_206819    | myosin binding protein C, slow type                                                     | -2.3334785 down |
| FLJ45482     | AK127393     | uncharacterized LOC645566                                                               | -2.0237968 down |
| RAD21-AS1    | NR_033886    | RAD21 antisense RNA 1 (non-protein coding)                                              | -2.5131156 down |
|              |              |                                                                                         | -3.9413996 down |
| ZCCHC23      | AK127166     | zinc finger, CCHC domain containing 23                                                  | -5.029593 down  |
| C10orf58     | NM_001243780 | chromosome 10 open reading frame 58                                                     | -2.2744062 down |
| CBX1         | NM_006807    | chromobox homolog 1                                                                     | -2.1077194 down |
| NT5DC4       | BC041437     | 5'-nucleotidase domain containing 4                                                     | -2.1735709 down |
| CCNT1        | NM_001240    | cyclin T1                                                                               | -2.7882442 down |
| KLK8         | NM_144505    | kallikrein-related peptidase 8                                                          | -3.1755412 down |
|              |              |                                                                                         | -2.2669382 down |
|              |              |                                                                                         | -3.81752 down   |
| MAGIX        | DQ884401     | MAGI family member, X-linked                                                            | -3.233026 down  |
|              |              |                                                                                         | -4.2233114 down |
| EDA          | NM_001005610 | ectodysplasin A                                                                         | -2.1785462 down |
| NAT8         | NM_003960    | N-acetyltransferase 8 (GCN5-related, putative)                                          | -2.8716145 down |
| LOC442421    | NR_024496    | uncharacterized LOC442421                                                               | -2.1895514 down |
| SERPINI2     | NM_006217    | serpin peptidase inhibitor, clade I (pancpin), member 2                                 | -2.0928302 down |
| AGPHD1       | NM_001083612 | aminoglycoside phosphotransferase domain containing 1                                   | -3.9076874 down |
| LOC728723    | NR_024398    | uncharacterized LOC728723                                                               | -3.2932596 down |
| OR13A1       | NM_001004297 | olfactory receptor, family 13, subfamily A, member 1                                    | -2.099428 down  |
| ADAMTS15     | NM_139055    | ADAM metallopeptidase with thrombospondin type 1 motif, 15                              | -2.1439404 down |
| ZNF813       | NM_001004301 | zinc finger protein 813                                                                 | -2.342992 down  |
| ADARB1       | NR_027673    | adenosine deaminase, RNA-specific, B1                                                   | -2.1330729 down |
| LOC100233156 | AK126241     | tektin 4 pseudogene                                                                     | -3.8529954 down |
| PPP2R3B-AS1  | NR_027232    | PPP2R3B antisense RNA 1 (non-protein coding)                                            | -2.9998403 down |
|              | BC040680     |                                                                                         | -2.1774023 down |
| LOC154822    | NR_024394    | uncharacterized LOC154822                                                               | -2.2514052 down |
| PRKD1        | NM_002742    | protein kinase D1                                                                       | -3.865807 down  |
| RAX2         | NM_032753    | retina and anterior neural fold homeobox 2                                              | -4.128754 down  |
| ZNF169       | NM_194320    | zinc finger protein 169                                                                 | -2.108995 down  |
| A1CF         | NM_138933    | APOBEC1 complementation factor                                                          | -3.7475994 down |
| GIPC3        | NM_133261    | GIPC PDZ domain containing family, member 3                                             | -2.9935844 down |
| LOC642620    | AK057320     | hCG1999814                                                                              | -3.0802457 down |
|              |              |                                                                                         | -2.9055536 down |
| SLCO5A1      | NM_030958    | solute carrier organic anion transporter family, member 5A1                             | -2.3006828 down |
| TAF5L        | NM_014409    | TAF5-like RNA polymerase II, p300/CBP-associated factor (PCAF)-associated factor, 65kDa | -3.531544 down  |
| GPC1         | NM_002081    | glypican 1                                                                              | -2.2077737 down |
| HHIPL1       | NM_032425    | HHIP-like 1                                                                             | -2.093702 down  |

|              |              |                                                                |                 |
|--------------|--------------|----------------------------------------------------------------|-----------------|
| HECTD2       | NM_182765    | HECT domain containing 2                                       | -4.0942264 down |
|              |              |                                                                | -2.8668354 down |
| CSHL1        | NM_022579    | chorionic somatomammotropin hormone-like 1                     | -2.6213083 down |
| BAI2         | NM_001703    | brain-specific angiogenesis inhibitor 2                        | -2.0643744 down |
| FAM106A      | NR_026809    | family with sequence similarity 106, member A                  | -3.5205219 down |
|              |              |                                                                | -2.9638157 down |
|              | AK127893     |                                                                | -4.8544517 down |
| VTCN1        | BC065717     | V-set domain containing T cell activation inhibitor 1          | -2.031538 down  |
| LOC100132529 | XR_109319    | uncharacterized LOC100132529                                   | -2.9600005 down |
| LOC100127904 | BC065739     | uncharacterized LOC100127904                                   | -5.4386525 down |
| LOC440131    | NR_033889    | uncharacterized LOC440131                                      | -2.5443115 down |
|              | AF218021     |                                                                | -2.8649302 down |
| LOC728903    | AK093722     | uncharacterized LOC728903                                      | -2.5341508 down |
| ZDHC23       | AK127260     | zinc finger, DHHC-type containing 23                           | -6.0998616 down |
| FAM107B      | NM_031453    | family with sequence similarity 107, member B                  | -2.022441 down  |
| MZT2A        | BC017694     | mitotic spindle organizing protein 2A                          | -3.1391382 down |
| TMEM151B     | NM_001137560 | transmembrane protein 151B                                     | -2.982902 down  |
| TNFRSF6B     | NM_003823    | tumor necrosis factor receptor superfamily, member 6b, decoy   | -3.1570582 down |
|              | XR_108937    |                                                                | -2.4181159 down |
|              | AK300203     |                                                                | -2.6573431 down |
| EXOC3L2      | NM_138568    | exocyst complex component 3-like 2                             | -2.0027194 down |
| PRSS16       | NM_005865    | protease, serine, 16 (thymus)                                  | -11.002375 down |
| ABCG4        | NM_022169    | ATP-binding cassette, sub-family G (WHITE), member 4           | -2.0086153 down |
| LOC100233209 | NR_026544    | uncharacterized LOC100233209                                   | -2.3936365 down |
| OR7E5P       | NR_027688    | olfactory receptor, family 7, subfamily E, member 5 pseudogene | -3.4216955 down |
|              | BC042181     |                                                                | -3.1926172 down |
|              |              |                                                                | -3.2652285 down |
|              |              |                                                                | -2.2247903 down |
| VSIG10L      | NM_001163922 | V-set and immunoglobulin domain containing 10 like             | -2.73466 down   |
| FAM57B       | NM_031478    | family with sequence similarity 57, member B                   | -2.1494594 down |
| PHYHIP       | NM_014759    | phytanoyl-CoA 2-hydroxylase interacting protein                | -3.9368682 down |
| FLJ42022     | AK124016     | uncharacterized LOC646748                                      | -2.330798 down  |
| LOC100507410 | NR_040018    | uncharacterized LOC100507410                                   | -2.4516547 down |
| GOLGA6L9     | NM_198181    | golgin A6 family-like 9                                        | -2.619375 down  |
| NACAD        | NM_001146334 | NAC alpha domain containing                                    | -2.9412565 down |
| POTED        | NM_174981    | POTE ankyrin domain family, member D                           | -3.989508 down  |
|              | DQ786249     |                                                                | -3.532068 down  |
| ZNF471       | NM_020813    | zinc finger protein 471                                        | -2.1810136 down |
| MTSS1L       | NM_138383    | metastasis suppressor 1-like                                   | -3.9568074 down |
| ZNF169       | NM_194320    | zinc finger protein 169                                        | -2.2940533 down |
| LOC100130894 | NR_034083    | uncharacterized LOC100130894                                   | -2.3949747 down |

|              |              |                                                                        |                 |
|--------------|--------------|------------------------------------------------------------------------|-----------------|
| LGALS14      | NM_203471    | lectin, galactoside-binding, soluble, 14                               | -2.9478471 down |
| KRT34        | NM_021013    | keratin 34                                                             | -3.3958266 down |
| TLE6         | NM_001143986 | transducin-like enhancer of split 6 (E(sp1) homolog, Drosophila)       | -3.1661563 down |
| DNAH7        | AK094515     | dynein, axonemal, heavy chain 7                                        | -2.0253835 down |
|              |              |                                                                        | -4.0448604 down |
| ENGASE       | NM_001042573 | endo-beta-N-acetylglucosaminidase                                      | -3.5386775 down |
| PLA2G6       | NM_001004426 | phospholipase A2, group VI (cytosolic, calcium-independent)            | -2.614979 down  |
|              | DB063160     |                                                                        | -2.2317536 down |
| HSPB3        | NM_006308    | heat shock 27kDa protein 3                                             | -2.325979 down  |
| PGM5P2       | NR_002836    | phosphoglucomutase 5 pseudogene 2                                      | -2.2196925 down |
| FLJ43879     | NR_034162    | FLJ43879 protein                                                       | -2.1957731 down |
| RIPK4        | NM_020639    | receptor-interacting serine-threonine kinase 4                         | -2.3816807 down |
| MMP21        | NM_147191    | matrix metalloproteinase 21                                            | -2.1670947 down |
| NOL3         | NM_003946    | nucleolar protein 3 (apoptosis repressor with CARD domain)             | -2.2851138 down |
| DARC         | NM_002036    | Duffy blood group, chemokine receptor                                  | -2.721878 down  |
| REM1         | NM_014012    | RAS (RAD and GEM)-like GTP-binding 1                                   | -2.496624 down  |
| CALHM3       | NM_001129742 | calcium homeostasis modulator 3                                        | -2.9816327 down |
| EPS8L1       | NM_133180    | EPS8-like 1                                                            | -2.1542614 down |
| FAM179A      |              | family with sequence similarity 179, member A                          | -2.0284348 down |
|              |              |                                                                        | -3.6973152 down |
|              | BX457161     |                                                                        | -3.0089655 down |
| RIMKLB       | NM_020734    | ribosomal modification protein rimK-like family member B               | -2.3866327 down |
| LUZP1        | BC051733     | leucine zipper protein 1                                               | -2.8773108 down |
| NEDD4L       | NM_001144967 | neural precursor cell expressed, developmentally down-regulated 4-like | -2.0620732 down |
|              | AK026812     |                                                                        | -2.6088536 down |
| CHRNA4       | NM_000744    | cholinergic receptor, nicotinic, alpha 4                               | -2.7507045 down |
|              |              |                                                                        | -2.6687324 down |
|              | CB962925     |                                                                        | -6.2553062 down |
| ZNF135       | NM_003436    | zinc finger protein 135                                                | -2.5344617 down |
|              | DA571569     |                                                                        | -2.8202133 down |
| CDC42EP1     | NM_152243    | CDC42 effector protein (Rho GTPase binding) 1                          | -2.139466 down  |
| FAM123C      | NM_152698    | family with sequence similarity 123C                                   | -2.7864103 down |
| PGA3         | NM_001079807 | pepsinogen 3, group I (pepsinogen A)                                   | -2.4115167 down |
| ETV6         | NM_001987    | ets variant 6                                                          | -2.0668702 down |
| GRHL3        | NM_198174    | grainyhead-like 3 (Drosophila)                                         | -4.2577024 down |
| LOC100130872 | NR_024569    | uncharacterized LOC100130872                                           | -2.1362271 down |
| TMEM51       | NM_001136216 | transmembrane protein 51                                               | -2.8962402 down |
| LOC255411    | NR_029448    | uncharacterized LOC255411                                              | -2.5803335 down |
| IRX4         | NM_016358    | iroquois homeobox 4                                                    | -2.227684 down  |
| ADARB2       | NM_018702    | adenosine deaminase, RNA-specific, B2                                  | -2.1071332 down |
|              | XM_003403511 |                                                                        | -5.0659294 down |

|           |              |                                                                                                   |                 |
|-----------|--------------|---------------------------------------------------------------------------------------------------|-----------------|
| LINC00483 | AK000701     | long intergenic non-protein coding RNA 483                                                        | -3.1257324 down |
|           | AK057884     |                                                                                                   | -2.1409512 down |
| EIF4E1B   | NM_001099408 | eukaryotic translation initiation factor 4E family member 1B                                      | -3.3814898 down |
|           | AK096159     |                                                                                                   | -3.352346 down  |
| PDE8B     | NM_003719    | phosphodiesterase 8B                                                                              | -5.3174696 down |
|           |              |                                                                                                   | -2.2083623 down |
| NRXN3     | NM_004796    | neurexin 3                                                                                        | -2.1737566 down |
| C6orf154  | NM_001012974 | chromosome 6 open reading frame 154                                                               | -2.7284353 down |
| OR51A2    | NM_001004748 | olfactory receptor, family 51, subfamily A, member 2                                              | -2.214204 down  |
| SLC16A10  | NM_018593    | solute carrier family 16, member 10 (aromatic amino acid transporter)                             | -2.1475823 down |
|           |              |                                                                                                   | -2.2522726 down |
| CT47A11   | NM_173571    | cancer/testis antigen family 47, member A11                                                       | -2.2315848 down |
| C2orf81   | NM_001145054 | chromosome 2 open reading frame 81                                                                | -2.946376 down  |
| TBX3      | NM_016569    | T-box 3                                                                                           | -3.092287 down  |
| LOC284454 | NR_036515    | uncharacterized LOC284454                                                                         | -2.3870957 down |
| SEC61A2   | NM_018144    | Sec61 alpha 2 subunit ( <i>S. cerevisiae</i> )                                                    | -2.6974995 down |
| COL8A1    | NM_001850    | collagen, type VIII, alpha 1                                                                      | -3.1609988 down |
| SYN3      | NM_133633    | synapsin III                                                                                      | -2.006292 down  |
| SLC22A25  | NM_199352    | solute carrier family 22, member 25                                                               | -2.47531 down   |
| PLBD2     | NM_173542    | phospholipase B domain containing 2                                                               | -2.3007019 down |
| VSX1      | NM_199425    | visual system homeobox 1                                                                          | -2.512559 down  |
|           | XR_110849    |                                                                                                   | -2.069769 down  |
|           |              |                                                                                                   | -2.5725393 down |
|           |              |                                                                                                   | -3.1031451 down |
| C19orf69  | NM_001130514 | chromosome 19 open reading frame 69                                                               | -2.3431609 down |
| NFATC2IP  | NM_032815    | nuclear factor of activated T-cells, cytoplasmic, calcineurin-dependent 2 interacting protein     | -2.4465878 down |
| BTNL2     | NM_019602    | butyrophilin-like 2 (MHC class II associated)                                                     | -2.7211523 down |
| HES3      | NM_001024598 | hairy and enhancer of split 3 ( <i>Drosophila</i> )                                               | -2.6749797 down |
| UBD       | NM_006398    | ubiquitin D                                                                                       | -4.809574 down  |
| OR7D4     | NM_001005191 | olfactory receptor, family 7, subfamily D, member 4                                               | -3.0526707 down |
| ENDOV     | NM_173627    | endonuclease V                                                                                    | -3.2813058 down |
|           |              |                                                                                                   | -3.242217 down  |
| S100B     |              | S100 calcium binding protein B                                                                    | -2.3076413 down |
| TRIM46    | NM_025058    | tripartite motif containing 46                                                                    | -3.551807 down  |
| CACNA1C   | NM_199460    | calcium channel, voltage-dependent, L type, alpha 1C subunit                                      | -2.6821473 down |
| PRMT8     | NM_019854    | protein arginine methyltransferase 8                                                              | -2.2988193 down |
| MGAT4C    | NM_013244    | mannosyl (alpha-1,3-)-glycoprotein beta-1,4-N-acetylglucosaminyltransferase, isozyme C (putative) | -2.0604637 down |
| RBFOX2    | NM_001031695 | RNA binding protein, fox-1 homolog ( <i>C. elegans</i> ) 2                                        | -6.778945 down  |
| TMEM37    |              | transmembrane protein 37                                                                          | -2.0115738 down |
| SLC22A2   | NM_003058    | solute carrier family 22 (organic cation transporter), member 2                                   | -2.0932717 down |



|              |              |                                                              |            |      |
|--------------|--------------|--------------------------------------------------------------|------------|------|
|              | XR_110942    |                                                              | -6.1331234 | down |
|              | X81001       |                                                              | -2.7846134 | down |
| CXorf28      | NR_038428    | chromosome X open reading frame 28                           | -2.0084805 | down |
|              |              |                                                              | -2.9862378 | down |
| LOC100129775 | AK094853     | uncharacterized LOC100129775                                 | -3.8658996 | down |
| MGC4859      | BC002644     | uncharacterized LOC79150                                     | -2.8889797 | down |
| SENP1        | NM_014554    | SUMO1/sentrin specific peptidase 1                           | -2.44317   | down |
| CRB2         | NM_173689    | crumbs homolog 2 (Drosophila)                                | -3.0469072 | down |
| BPIFA3       | NM_178466    | BPI fold containing family A, member 3                       | -2.1466963 | down |
| SCN5A        | NM_001099404 | sodium channel, voltage-gated, type V, alpha subunit         | -2.1593676 | down |
| LOC283856    | NR_027078    | uncharacterized LOC283856                                    | -3.9197576 | down |
| GRIK2        | NM_021956    | glutamate receptor, ionotropic, kainate 2                    | -2.0101447 | down |
| NPFFR1       | NM_022146    | neuropeptide FF receptor 1                                   | -2.3120403 | down |
| PARVB        | AK309987     | parvin, beta                                                 | -2.1484697 | down |
|              | AK130794     |                                                              | -2.8214889 | down |
|              |              |                                                              | -2.4623194 | down |
| KCNJ6        | NM_002240    | potassium inwardly-rectifying channel, subfamily J, member 6 | -2.2140284 | down |
|              |              |                                                              | -2.734938  | down |
| FPGT-TNNI3K  | BX640903     | FPGT-TNNI3K readthrough                                      | -3.0323894 | down |
| LOC100130238 | NR_024563    | uncharacterized LOC100130238                                 | -2.4025908 | down |
| AK7          | NM_152327    | adenylate kinase 7                                           | -2.3729737 | down |
|              | AK097143     |                                                              | -2.0021162 | down |
| LOC202181    | NR_026921    | chromosome 5 open reading frame 25 pseudogene                | -6.883093  | down |
|              |              |                                                              | -4.0024467 | down |
| ADAMTSL1     | NM_052866    | ADAMTS-like 1                                                | -2.2870672 | down |
| VWA5B1       | AK125833     | von Willebrand factor A domain containing 5B1                | -4.0214868 | down |
| ZNF205       | NM_003456    | zinc finger protein 205                                      | -3.5070689 | down |
| HAS3         | NM_138612    | hyaluronan synthase 3                                        | -2.525828  | down |
| SNX30        | NM_001012994 | sorting nexin family member 30                               | -2.224706  | down |
|              |              |                                                              | -3.3599677 | down |
| NKPD1        | NM_198478    | NTPase, KAP family P-loop domain containing 1                | -4.0329967 | down |
| P4HA3        | NM_182904    | prolyl 4-hydroxylase, alpha polypeptide III                  | -2.103879  | down |
| SLC26A9      | NM_052934    | solute carrier family 26, member 9                           | -2.0560274 | down |
| DEFB128      | NM_001037732 | defensin, beta 128                                           | -2.638117  | down |
| SPTSSB       | BC130565     | serine palmitoyltransferase, small subunit B                 | -2.507794  | down |
|              |              |                                                              | -4.0071855 | down |
|              | BF106382     |                                                              | -2.3401406 | down |
| TPSD1        | NM_012217    | tryptase delta 1                                             | -2.5900114 | down |
| ETV3         | NM_001145312 | ets variant 3                                                | -2.7701516 | down |
| LOC149134    | NR_015422    | uncharacterized LOC149134                                    | -2.342262  | down |
| NYNRIN       | NM_025081    | NYN domain and retroviral integrase containing               | -2.2675173 | down |

|              |              |                                                                        |                 |
|--------------|--------------|------------------------------------------------------------------------|-----------------|
| VWA5A        | NM_198315    | von Willebrand factor A domain containing 5A                           | -2.3822362 down |
|              |              |                                                                        | -2.776681 down  |
| ZNF774       | NM_001004309 | zinc finger protein 774                                                | -2.1446857 down |
| METTL21A     | NM_001127395 | methyltransferase like 21A                                             | -3.6845732 down |
| FBXO43       | NM_001029860 | F-box protein 43                                                       | -2.5005777 down |
|              | AK123993     |                                                                        | -2.828009 down  |
| DGCR9        | NR_024159    | DiGeorge syndrome critical region gene 9                               | -2.7433918 down |
| MUC5B        | NM_002458    | mucin 5B, oligomeric mucus/gel-forming                                 | -6.858593 down  |
| LOC100653259 | XR_133099    | e3 ubiquitin-protein ligase HERC2-like                                 | -3.6758735 down |
| LOC440993    | XR_110395    | uncharacterized LOC440993                                              | -2.7566223 down |
| PRAMEF2      | NM_023014    | PRAME family member 2                                                  | -2.755429 down  |
| GCLM         | NM_002061    | glutamate-cysteine ligase, modifier subunit                            | -2.3291495 down |
|              |              |                                                                        | -5.762676 down  |
| SLC35A4      | AF445025     | solute carrier family 35, member A4                                    | -2.3749065 down |
| TBCD         | AL096745     | tubulin folding cofactor D                                             | -3.2921207 down |
|              | XR_110925    |                                                                        | -2.1033428 down |
|              |              |                                                                        | -2.5059135 down |
| GRIN2D       | NM_000836    | glutamate receptor, ionotropic, N-methyl D-aspartate 2D                | -2.127539 down  |
| RAB7B        | NM_177403    | RAB7B, member RAS oncogene family                                      | -2.7598479 down |
|              |              |                                                                        | -2.2084846 down |
| XRCC2        | NM_005431    | X-ray repair complementing defective repair in Chinese hamster cells 2 | -3.9412048 down |
| FAM24A       | NM_001029888 | family with sequence similarity 24, member A                           | -2.546498 down  |
| SP6          | NM_199262    | Sp6 transcription factor                                               | -2.0697722 down |
| ALX1         | NM_006982    | ALX homeobox 1                                                         | -2.365797 down  |
| C10orf71     | NM_001135196 | chromosome 10 open reading frame 71                                    | -2.0601904 down |
| KIAA0090     |              | KIAA0090                                                               | -4.023962 down  |
| GGT6         | NM_153338    | gamma-glutamyltransferase 6                                            | -5.5791426 down |
| NSAP11       | XR_110862    | nervous system abundant protein 11                                     | -2.004151 down  |
| MASP2        | NM_006610    | mannan-binding lectin serine peptidase 2                               | -3.7483637 down |
| LOC644649    | BX108667     | apolipoprotein O pseudogene                                            | -2.2276397 down |
| KIAA0087     | NR_022006    | KIAA0087                                                               | -2.3426142 down |
| LOC283693    | NR_036446    | actin, gamma pseudogene                                                | -2.2174149 down |
|              |              |                                                                        | -3.9314988 down |
| TTC7A        | NM_020458    | tetratricopeptide repeat domain 7A                                     | -2.294366 down  |
| MCF2L        |              | MCF.2 cell line derived transforming sequence-like                     | -2.5119946 down |
| BGN          | NM_001711    | biglycan                                                               | -5.2434115 down |
| PADI3        | NM_016233    | peptidyl arginine deiminase, type III                                  | -2.3341827 down |
|              | AK125749     |                                                                        | -2.8895736 down |
| SIGLEC6      | NM_001245    | sialic acid binding Ig-like lectin 6                                   | -5.1416054 down |
| FAM92A3      | NR_003612    | family with sequence similarity 92, member A3                          | -5.862625 down  |
| GTF2IRD2B    |              | GTF2I repeat domain containing 2B                                      | -3.0058002 down |

|              |              |                                                              |            |      |
|--------------|--------------|--------------------------------------------------------------|------------|------|
| C5orf58      | NM_001102609 | chromosome 5 open reading frame 58                           | -2.3745775 | down |
| JAG2         | NM_002226    | jagged 2                                                     | -2.342133  | down |
| S100A3       | NM_002960    | S100 calcium binding protein A3                              | -3.446978  | down |
| LINC00277    | NR_026949    | long intergenic non-protein coding RNA 277                   | -2.0005004 | down |
| CACNA1G      | NM_018896    | calcium channel, voltage-dependent, T type, alpha 1G subunit | -2.7417939 | down |
| C1orf21      | NM_030806    | chromosome 1 open reading frame 21                           | -3.111706  | down |
|              | AF116661     |                                                              | -2.8661096 | down |
| KIAA1161     | NM_020702    | KIAA1161                                                     | -2.7705297 | down |
|              |              |                                                              | -2.3838866 | down |
| CTNS         |              | cystinosis, lysosomal cystine transporter                    | -2.8170528 | down |
| C1QL2        | NM_182528    | complement component 1, q subcomponent-like 2                | -4.247638  | down |
| ATP13A2      | NM_022089    | ATPase type 13A2                                             | -2.0642447 | down |
| HERC2P7      | XR_133065    | hect domain and RLD 2 pseudogene 7                           | -2.542685  | down |
| P2RY6        | NM_176798    | pyrimidinergic receptor P2Y, G-protein coupled, 6            | -2.18919   | down |
|              |              |                                                              | -3.347469  | down |
|              |              |                                                              | -2.7305565 | down |
| C19orf63     | NM_206538    | chromosome 19 open reading frame 63                          | -2.4077103 | down |
| ILDR1        | NM_175924    | immunoglobulin-like domain containing receptor 1             | -2.6286054 | down |
| GAFA1        | AF190748     | FGF2-associated protein GAFA1                                | -2.0848186 | down |
| LOC100499221 | AK127052     | uncharacterized LOC100499221                                 | -4.90141   | down |
| HERC2        | NM_004667    | hect domain and RLD 2                                        | -2.2911088 | down |
| VHL          | NM_000551    | von Hippel-Lindau tumor suppressor                           | -3.0923693 | down |
| GRIA1        | NM_000827    | glutamate receptor, ionotropic, AMPA 1                       | -2.0847723 | down |
|              |              |                                                              | -2.5602794 | down |
| RGL1         | NM_015149    | ral guanine nucleotide dissociation stimulator-like 1        | -5.1065435 | down |
| MPV17L       | NM_173803    | MPV17 mitochondrial membrane protein-like                    | -3.6402934 | down |
|              |              |                                                              | -2.7281613 | down |
|              | BC014063     |                                                              | -3.6603844 | down |
| NRIP3        | NM_020645    | nuclear receptor interacting protein 3                       | -2.0406232 | down |
|              |              |                                                              | -2.2177672 | down |
|              |              |                                                              | -3.3741927 | down |
|              | BC040611     |                                                              | -2.7199779 | down |
|              | AF514420     |                                                              | -2.4019191 | down |
| NTF3         | NM_002527    | neurotrophin 3                                               | -2.3882217 | down |
| ZNF667       | NM_022103    | zinc finger protein 667                                      | -2.1410785 | down |
| OR10A6       | NM_001004461 | olfactory receptor, family 10, subfamily A, member 6         | -3.0233197 | down |
| LOC284219    | AK094436     | uncharacterized LOC284219                                    | -6.937428  | down |
| SIX6         | NM_007374    | SIX homeobox 6                                               | -3.0015733 | down |
| CCDC9        | NM_015603    | coiled-coil domain containing 9                              | -2.431223  | down |
| LAMA2        | NM_000426    | laminin, alpha 2                                             | -2.1883686 | down |
| OR4N4        | NM_001005241 | olfactory receptor, family 4, subfamily N, member 4          | -4.0046897 | down |

|              |              |                                                                            |                 |
|--------------|--------------|----------------------------------------------------------------------------|-----------------|
| DNM1P46      | NR_003260    | DNM1 pseudogene 46                                                         | -2.9753864 down |
| PDCL2        | NM_152401    | phosducin-like 2                                                           | -2.1179345 down |
| KIAA1751     | NM_001080484 | KIAA1751                                                                   | -2.0209827 down |
| LOC338758    | NR_028138    | uncharacterized LOC338758                                                  | -2.1287215 down |
|              | BM981407     |                                                                            | -5.814292 down  |
| E2F7         | NM_203394    | E2F transcription factor 7                                                 | -2.8482833 down |
| FAM181B      | NM_175885    | family with sequence similarity 181, member B                              | -2.804772 down  |
| CLPTM1       | NM_001294    | cleft lip and palate associated transmembrane protein 1                    | -2.5246377 down |
| AZFP         | XR_109896    | AML-associated zinc finger protein                                         | -2.305171 down  |
| MDH1B        | AK309144     | malate dehydrogenase 1B, NAD (soluble)                                     | -4.026212 down  |
| PGAM5        | NM_138575    | phosphoglycerate mutase family member 5                                    | -2.82386 down   |
|              | XM_002342821 |                                                                            | -4.8995767 down |
| LOC729609    | NR_024440    | uncharacterized LOC729609                                                  | -2.7213964 down |
| C14orf167    | NR_023921    | chromosome 14 open reading frame 167                                       | -3.4821274 down |
| GNG12        | NM_018841    | guanine nucleotide binding protein (G protein), gamma 12                   | -2.5622551 down |
| FLJ10661     | NR_024362    | family with sequence similarity 86, member A pseudogene                    | -3.8406982 down |
| ERVW-1       | NM_014590    | endogenous retrovirus group W, member 1                                    | -4.2838273 down |
| RPH3AL       | NM_006987    | rabphilin 3A-like (without C2 domains)                                     | -3.1777015 down |
| FAM201B      | BC045732     | family with sequence similarity 201, member B                              | -4.605173 down  |
|              | XR_108612    |                                                                            | -5.1520066 down |
|              |              |                                                                            | -3.4537048 down |
| ARHGAP42     | NM_152432    | Rho GTPase activating protein 42                                           | -2.7685244 down |
| LOC84931     | NR_027181    | uncharacterized LOC84931                                                   | -2.1107287 down |
| C8orf74      | NM_001040032 | chromosome 8 open reading frame 74                                         | -3.8976905 down |
| LOC100507547 | NR_037169    | uncharacterized LOC100507547                                               | -3.1023297 down |
| CPLX2        | NM_006650    | complexin 2                                                                | -3.2364979 down |
| ND1          | BC061915     | NADH dehydrogenase, subunit 1 (complex I)                                  | -2.0146625 down |
| HOMER3       | NM_001145724 | homer homolog 3 (Drosophila)                                               | -2.2147903 down |
| PRODH2       | NM_021232    | proline dehydrogenase (oxidase) 2                                          | -2.0751872 down |
| CD86         | NM_006889    | CD86 molecule                                                              | -6.0708394 down |
| LOC643719    | NR_027620    | uncharacterized LOC643719                                                  | -2.312933 down  |
| TBX4         | NM_018488    | T-box 4                                                                    | -2.0030367 down |
| FAM19A4      | NM_182522    | family with sequence similarity 19 (chemokine (C-C motif)-like), member A4 | -2.1570458 down |
| POU4F3       | NM_002700    | POU class 4 homeobox 3                                                     | -2.1781178 down |
|              | BC007749     |                                                                            | -4.605416 down  |
|              | BC035135     |                                                                            | -4.0899434 down |
| AMZ1         | NM_133463    | archaelysin family metalloproteinase 1                                     | -3.0072765 down |
| PAR4         | NR_022010    | Prader-Willi/Angelman region gene 4                                        | -7.4043956 down |
| TCFL5        | BC046933     | transcription factor-like 5 (basic helix-loop-helix)                       | -2.0931942 down |
| ALDH1L2      | NM_001034173 | aldehyde dehydrogenase 1 family, member L2                                 | -2.5476327 down |

|              |              |                                                                   |                 |
|--------------|--------------|-------------------------------------------------------------------|-----------------|
|              |              |                                                                   | -21.25616 down  |
| ADAMTS4      | BC030812     | ADAM metallopeptidase with thrombospondin type 1 motif, 4         | -2.774159 down  |
| VPS18        | NM_020857    | vacuolar protein sorting 18 homolog ( <i>S. cerevisiae</i> )      | -2.7445157 down |
| GRIA4        | NM_001077243 | glutamate receptor, ionotropic, AMPA 4                            | -2.414727 down  |
| BCL11B       | NM_138576    | B-cell CLL/lymphoma 11B (zinc finger protein)                     | -2.95319 down   |
| FER1L5       | NM_001113382 | fer-1-like 5 ( <i>C. elegans</i> )                                | -2.0715592 down |
| ZNF852       | XM_001717544 | zinc finger protein 852                                           | -2.7356296 down |
| RND1         | NM_014470    | Rho family GTPase 1                                               | -2.352077 down  |
| LOC389906    | NR_034031    | zinc finger protein 839 pseudogene                                | -2.572595 down  |
| TCEB3B       | NM_016427    | transcription elongation factor B polypeptide 3B (elongin A2)     | -3.5261405 down |
| C7orf10      | NM_024728    | chromosome 7 open reading frame 10                                | -2.821668 down  |
| C10orf47     | NM_153256    | chromosome 10 open reading frame 47                               | -2.5315373 down |
|              |              |                                                                   | -3.031054 down  |
| BNIP3L       | AF370457     | BCL2/adenovirus E1B 19kDa interacting protein 3-like              | -2.8183804 down |
| MGC14436     | NR_026661    | uncharacterized LOC84983                                          | -2.1342783 down |
| TBC1D3       | AK122833     | TBC1 domain family, member 3                                      | -2.378262 down  |
| MCC          | NM_001085377 | mutated in colorectal cancers                                     | -2.6274388 down |
| LOC283403    | NM_001242696 | uncharacterized LOC283403                                         | -2.4312103 down |
| IFFO1        | NR_036467    | intermediate filament family orphan 1                             | -2.5381324 down |
|              |              |                                                                   | -2.6310046 down |
| LOC284373    | BX537909     | uncharacterized LOC284373                                         | -2.0076368 down |
| KCNB2        | NM_004770    | potassium voltage-gated channel, Shab-related subfamily, member 2 | -2.4696224 down |
| FLJ45831     | XR_109367    | uncharacterized FLJ45831                                          | -2.4534793 down |
| KCTD19       | NM_001100915 | potassium channel tetramerisation domain containing 19            | -2.0930295 down |
| BMPER        | AB075845     | BMP binding endothelial regulator                                 | -2.4310462 down |
|              |              |                                                                   | -3.5182805 down |
|              | XR_111612    |                                                                   | -5.910486 down  |
| FAM22F       | NM_017561    | family with sequence similarity 22, member F                      | -2.226387 down  |
| CCDC50       | NM_178335    | coiled-coil domain containing 50                                  | -2.0695076 down |
|              |              |                                                                   | -2.2071064 down |
|              |              |                                                                   | -2.3678603 down |
| DNMT3A       | NM_175629    | DNA (cytosine-5-)-methyltransferase 3 alpha                       | -2.0584514 down |
| SPAG17       | NM_206996    | sperm associated antigen 17                                       | -2.1135762 down |
| ARHGAP21     | BX537570     | Rho GTPase activating protein 21                                  | -2.3107944 down |
|              |              |                                                                   | -2.2358017 down |
| LOC100131066 | AK126015     | uncharacterized LOC100131066                                      | -2.6286132 down |
| HDAC10       | NM_032019    | histone deacetylase 10                                            | -2.5226002 down |
| LOC440386    | BC029817     | uncharacterized LOC440386                                         | -2.2441561 down |
| LOC344967    | NR_027277    | acyl-CoA thioesterase 7 pseudogene                                | -2.1843812 down |
| SERPINB7     | NM_001040147 | serpin peptidase inhibitor, clade B (ovalbumin), member 7         | -2.9745972 down |
| GABRB1       | AK296023     | gamma-aminobutyric acid (GABA) A receptor, beta 1                 | -2.3036993 down |

|              |                  |                                                                                             |                 |
|--------------|------------------|---------------------------------------------------------------------------------------------|-----------------|
| ERVFRD-2     | AK127846         | endogenous retrovirus group FRD, member 2                                                   | -3.3377197 down |
|              | AF074986         |                                                                                             | -2.3169346 down |
| LAMC2        | NM_005562        | laminin, gamma 2                                                                            | -2.3459158 down |
|              | AB306172         |                                                                                             | -2.4201303 down |
| YWHAE        | AK296555         | tyrosine 3-monooxygenase/tryptophan 5-monooxygenase activation protein, epsilon polypeptide | -2.908293 down  |
| LOC100507547 | NR_037169        | uncharacterized LOC100507547                                                                | -2.4733112 down |
| MAP3K6       | NM_004672        | mitogen-activated protein kinase kinase kinase 6                                            | -2.601848 down  |
| LOC728158    | AK125527         | hCG2044975                                                                                  | -2.263453 down  |
| C20orf85     | NM_178456        | chromosome 20 open reading frame 85                                                         | -2.8147066 down |
|              |                  |                                                                                             | -3.5980184 down |
| PER2         | NM_022817        | period homolog 2 (Drosophila)                                                               | -2.9666555 down |
| CDH4         | NM_001794        | cadherin 4, type 1, R-cadherin (retinal)                                                    | -6.0878124 down |
|              | 02-mar NM_017898 | mitochondrial amidoxime reducing component 2                                                | -2.0407164 down |
| CDH2         | NM_001792        | cadherin 2, type 1, N-cadherin (neuronal)                                                   | -3.714384 down  |
| C9orf131     | NM_203299        | chromosome 9 open reading frame 131                                                         | -2.3778877 down |
| PMS2L2       | BC010535         | postmeiotic segregation increased 2-like 2 pseudogene                                       | -2.4203024 down |
| GH2          | NM_022558        | growth hormone 2                                                                            | -2.3368669 down |
| MYO1C        | NM_033375        | myosin IC                                                                                   | -2.173801 down  |
| GTF2IRD2     | NM_173537        | GTF2I repeat domain containing 2                                                            | -2.7550595 down |
| LOC100128703 | AK128830         | uncharacterized LOC100128703                                                                | -2.4644034 down |
| BICC1        | NM_001080512     | bicaudal C homolog 1 (Drosophila)                                                           | -3.3942635 down |
| LYPD3        | NM_014400        | LY6/PLAUR domain containing 3                                                               | -2.2153616 down |
| HFE2         | NM_213653        | hemochromatosis type 2 (juvenile)                                                           | -2.420331 down  |
| PRDM15       | NM_001040424     | PR domain containing 15                                                                     | -2.3053489 down |
| ENTPD8       | NM_001033113     | ectonucleoside triphosphate diphosphohydrolase 8                                            | -3.736031 down  |
| FAM40A       | NM_033088        | family with sequence similarity 40, member A                                                | -2.442973 down  |
| TECPR2       | NM_001172631     | tectonin beta-propeller repeat containing 2                                                 | -2.1858718 down |
|              |                  |                                                                                             | -3.782386 down  |
| VIT          | NM_053276        | vitrin                                                                                      | -2.0297961 down |
|              |                  |                                                                                             | -2.0486994 down |
|              |                  |                                                                                             | -4.886796 down  |
| LOC284581    | AK094426         | uncharacterized LOC284581                                                                   | -9.800617 down  |
| THNSL2       | NM_001244676     | threonine synthase-like 2 (S. cerevisiae)                                                   | -3.135761 down  |
| SPACA1       | NM_030960        | sperm acrosome associated 1                                                                 | -3.5610242 down |
| MAD2L2       |                  | MAD2 mitotic arrest deficient-like 2 (yeast)                                                | -3.2875857 down |
| FAM27A       | NR_024060        | family with sequence similarity 27, member A                                                | -2.4772813 down |
| GRAP         | NM_006613        | GRB2-related adaptor protein                                                                | -2.0227585 down |
| FUT11        | BC100994         | fucosyltransferase 11 (alpha (1,3) fucosyltransferase)                                      | -2.0068507 down |
|              |                  |                                                                                             | -2.789328 down  |
|              |                  |                                                                                             | -2.1246498 down |

|           |              |                                                               |                 |
|-----------|--------------|---------------------------------------------------------------|-----------------|
| SLC14A2   | NM_007163    | solute carrier family 14 (urea transporter), member 2         | -2.5524795 down |
|           | AK021797     |                                                               | -2.5752614 down |
| FAM3A     | NM_001171134 | family with sequence similarity 3, member A                   | -2.1456265 down |
| ARHGEF35  | NM_001003702 | Rho guanine nucleotide exchange factor (GEF) 35               | -2.4864452 down |
| NS3BP     | XR_109071    | NS3BP                                                         | -2.2801344 down |
| HELT      | NM_001029887 | helt bHLH transcription factor                                | -2.0148091 down |
| C4orf19   | NM_018302    | chromosome 4 open reading frame 19                            | -2.4065623 down |
| POU6F2    | NM_007252    | POU class 6 homeobox 2                                        | -2.414026 down  |
|           | XR_133518    |                                                               | -2.5860279 down |
| LOC63930  | NR_033370    | uncharacterized LOC63930                                      | -2.8614426 down |
| BMP8A     | NM_181809    | bone morphogenetic protein 8a                                 | -2.676179 down  |
| PPP1R13L  | NM_006663    | protein phosphatase 1, regulatory subunit 13 like             | -2.252408 down  |
| LINC00301 | NR_026946    | long intergenic non-protein coding RNA 301                    | -4.916239 down  |
| HIST3H2A  | NM_033445    | histone cluster 3, H2a                                        | -2.0041134 down |
| COL6A5    | NM_153264    | collagen, type VI, alpha 5                                    | -2.7317326 down |
| ZNF704    | NM_001033723 | zinc finger protein 704                                       | -3.5323913 down |
| LOC727982 | NR_034134    | uncharacterized LOC727982                                     | -2.262424 down  |
|           |              |                                                               | -3.0192158 down |
|           |              |                                                               | -3.394756 down  |
| MAGEE2    | NM_138703    | melanoma antigen family E, 2                                  | -2.00022 down   |
|           |              |                                                               | -3.1643271 down |
| EFCAB10   | NR_027068    | EF-hand calcium binding domain 10                             | -2.418079 down  |
| FAM41C    | NR_027055    | family with sequence similarity 41, member C                  | -3.758045 down  |
|           |              |                                                               | -3.4781518 down |
| CLDN14    | NM_144492    | claudin 14                                                    | -3.1466837 down |
| TMEM179   | NM_207379    | transmembrane protein 179                                     | -2.9599962 down |
| KCTD3     | NM_016121    | potassium channel tetramerisation domain containing 3         | -2.715921 down  |
| PROKR1    | NM_138964    | prokineticin receptor 1                                       | -2.236533 down  |
|           | DB155821     |                                                               | -2.791482 down  |
|           |              |                                                               | -2.2949421 down |
| FLJ22763  | NR_033977    | uncharacterized LOC401081                                     | -2.2647824 down |
|           |              |                                                               | -2.5410364 down |
| TMEM184A  | NM_001097620 | transmembrane protein 184A                                    | -3.2429647 down |
| FERMT1    | NM_017671    | fermitin family member 1                                      | -2.7994456 down |
| C14orf64  | NR_015430    | chromosome 14 open reading frame 64                           | -2.30505 down   |
| PRKAR1B   | NM_001164761 | protein kinase, cAMP-dependent, regulatory, type I, beta      | -2.5395684 down |
| B3GALNT2  | NM_152490    | beta-1,3-N-acetylgalactosaminyltransferase 2                  | -2.0110734 down |
|           |              |                                                               | -3.3423624 down |
| TNFRSF19  | BC035796     | tumor necrosis factor receptor superfamily, member 19         | -6.1958547 down |
| SYT2      | NM_001136504 | synaptotagmin II                                              | -3.063535 down  |
| SLC15A1   | AB001328     | solute carrier family 15 (oligopeptide transporter), member 1 | -2.1222937 down |

|              |              |                                                       |                 |
|--------------|--------------|-------------------------------------------------------|-----------------|
| HIST1H2BE    | NM_003523    | histone cluster 1, H2be                               | -2.0254223 down |
| MANEA        | NM_024641    | mannosidase, endo-alpha                               | -2.4143198 down |
|              | AK093443     |                                                       | -2.3377457 down |
| LOC100128591 | AK128705     | uncharacterized LOC100128591                          | -3.0677636 down |
| VRTN         | NM_018228    | vertebrae development homolog (pig)                   | -3.349385 down  |
| FAM149A      | NM_015398    | family with sequence similarity 149, member A         | -2.9712298 down |
| FUBP3        | NM_003934    | far upstream element (FUSE) binding protein 3         | -2.7376785 down |
| HSD11B2      | NM_000196    | hydroxysteroid (11-beta) dehydrogenase 2              | -2.1148684 down |
| LOC157627    | NR_024281    | uncharacterized LOC157627                             | -3.7326648 down |
| TUSC5        | NM_172367    | tumor suppressor candidate 5                          | -2.5799549 down |
| NLGN4X       | NM_020742    | neuroligin 4, X-linked                                | -2.2987318 down |
| CLCF1        | NM_013246    | cardiotrophin-like cytokine factor 1                  | -2.1565404 down |
| TLCD2        | NM_001164407 | TLC domain containing 2                               | -2.198005 down  |
| LOC284950    | NR_038888    | uncharacterized LOC284950                             | -2.9387305 down |
| SCRT2        | NM_033129    | scratch homolog 2, zinc finger protein (Drosophila)   | -2.2713118 down |
|              |              |                                                       | -4.360089 down  |
| ANGPTL2      | NM_012098    | angiopoietin-like 2                                   | -2.3287864 down |
| C12orf28     | XM_001716650 | chromosome 12 open reading frame 28                   | -2.132765 down  |
| KCNK4        | NM_033310    | potassium channel, subfamily K, member 4              | -2.363637 down  |
| RAD23B       | NM_002874    | RAD23 homolog B (S. cerevisiae)                       | -2.168622 down  |
| DMKN         | NM_033317    | dermokine                                             | -2.1554956 down |
| LOC389831    | NM_001242480 | uncharacterized LOC389831                             | -3.4519672 down |
| LOC100506310 | XM_003118845 | uncharacterized protein C1orf167-like                 | -2.6940622 down |
| C14orf178    | NM_174943    | chromosome 14 open reading frame 178                  | -2.2258563 down |
| MGC23270     | NR_024396    | uncharacterized LOC196872                             | -2.5431976 down |
| PDE4DIP      | NM_022359    | phosphodiesterase 4D interacting protein              | -3.0068479 down |
| KRTAP10-5    | NM_198694    | keratin associated protein 10-5                       | -3.916554 down  |
| MGP          | NM_000900    | matrix Gla protein                                    | -2.1918366 down |
| KRTAP3-3     | NM_033185    | keratin associated protein 3-3                        | -2.7511568 down |
| LOC100129785 | AK125285     | uncharacterized LOC100129785                          | -7.7528396 down |
| IL29         | NM_172140    | interleukin 29 (interferon, lambda 1)                 | -2.1498632 down |
| SUV420H2     | AK304562     | suppressor of variegation 4-20 homolog 2 (Drosophila) | -2.475215 down  |
| ZC3H12D      | NM_207360    | zinc finger CCCH-type containing 12D                  | -3.0985065 down |
|              |              |                                                       | -2.541297 down  |
|              |              |                                                       | -2.0397563 down |
| ST3GAL4      | AK021929     | ST3 beta-galactoside alpha-2,3-sialyltransferase 4    | -7.044811 down  |
| LOC100506310 | XR_132699    | uncharacterized protein C1orf167-like                 | -2.4711325 down |
| LOC652586    | XM_001719844 | uncharacterized LOC652586                             | -2.2931592 down |
|              |              |                                                       | -3.1073565 down |
|              |              |                                                       | -2.364695 down  |
| SLC30A2      | NM_001004434 | solute carrier family 30 (zinc transporter), member 2 | -2.9452925 down |



|              |              |                                                                           |                 |
|--------------|--------------|---------------------------------------------------------------------------|-----------------|
| SLC24A1      | NM_004727    | solute carrier family 24 (sodium/potassium/calcium exchanger), member 1   | -2.394274 down  |
| ZNF468       | NM_199132    | zinc finger protein 468                                                   | -2.8107257 down |
| TMEM146      | AK128088     | transmembrane protein 146                                                 | -3.2647536 down |
| ARHGEF17     | NM_014786    | Rho guanine nucleotide exchange factor (GEF) 17                           | -2.1165524 down |
|              |              |                                                                           | -2.2147217 down |
| HMGCS2       | NM_005518    | 3-hydroxy-3-methylglutaryl-CoA synthase 2 (mitochondrial)                 | -2.0311007 down |
| SPATA13      | NM_153023    | spermatogenesis associated 13                                             | -2.640243 down  |
| GRXCR2       | NM_001080516 | glutaredoxin, cysteine rich 2                                             | -2.2865386 down |
| ONECUT1      | NM_004498    | one cut homeobox 1                                                        | -2.0443244 down |
| OR13D1       | NM_001004484 | olfactory receptor, family 13, subfamily D, member 1                      | -2.1143165 down |
| OR5111       | NM_001005288 | olfactory receptor, family 51, subfamily I, member 1                      | -3.1008372 down |
| KCNE4        | NM_080671    | potassium voltage-gated channel, Isk-related family, member 4             | -5.6199284 down |
|              | U66047       |                                                                           | -4.487957 down  |
| FGFR3        | NM_000142    | fibroblast growth factor receptor 3                                       | -3.825862 down  |
| FAM108A1     | AK090438     | family with sequence similarity 108, member A1                            | -2.768594 down  |
| AFAP1-AS1    | NR_026892    | AFAP1 antisense RNA 1 (non-protein coding)                                | -2.1451848 down |
| ARPM1        | NM_032487    | actin related protein M1                                                  | -3.146077 down  |
|              |              |                                                                           | -2.0443058 down |
|              |              |                                                                           | -2.325933 down  |
| FLJ46066     | NR_040105    | uncharacterized LOC401103                                                 | -2.317953 down  |
| BOD1P        | BM559531     | bioorientation of chromosomes in cell division 1 pseudogene               | -2.5467656 down |
| MAMSTR       | NM_182574    | MEF2 activating motif and SAP domain containing transcriptional regulator | -2.9105282 down |
| DHRS2        | NM_182908    | dehydrogenase/reductase (SDR family) member 2                             | -3.0704036 down |
| REEP6        | NM_138393    | receptor accessory protein 6                                              | -2.875117 down  |
| RCOR2        | NM_173587    | REST corepressor 2                                                        | -3.462535 down  |
| KRTAP3-2     | NM_031959    | keratin associated protein 3-2                                            | -2.2148068 down |
| FLJ21408     | AK025061     | uncharacterized LOC400512                                                 | -4.825887 down  |
| FAT3         | NM_001008781 | FAT tumor suppressor homolog 3 (Drosophila)                               | -2.8852012 down |
| KRT222       | NM_152349    | keratin 222                                                               | -5.3459196 down |
|              | BM930849     |                                                                           | -3.6658337 down |
| SCN9A        | NM_002977    | sodium channel, voltage-gated, type IX, alpha subunit                     | -3.8044028 down |
| PROM2        | NM_001165978 | prominin 2                                                                | -7.005659 down  |
| SRCIN1       | NM_025248    | SRC kinase signaling inhibitor 1                                          | -4.1044054 down |
| PIP          | NM_002652    | prolactin-induced protein                                                 | -7.557286 down  |
| KRTAP9-1     | NM_001190460 | keratin associated protein 9-1                                            | -2.895403 down  |
| FAM176A      | NM_032181    | family with sequence similarity 176, member A                             | -2.3179898 down |
| PCDHGA3      | NM_032011    | protocadherin gamma subfamily A, 3                                        | -2.0073564 down |
| SHANK1       | NM_016148    | SH3 and multiple ankyrin repeat domains 1                                 | -4.383421 down  |
| STGC3        | XR_110003    | uncharacterized STGC3                                                     | -2.004961 down  |
| DKFZp451A211 | XM_003403663 | DKFZp451A211 protein                                                      | -3.0595014 down |

|              |              |                                                                   |                 |
|--------------|--------------|-------------------------------------------------------------------|-----------------|
| LOC100130452 | NR_034036    | uncharacterized LOC100130452                                      | -2.2544987 down |
| NR2F1        | NM_005654    | nuclear receptor subfamily 2, group F, member 1                   | -2.361522 down  |
| ARHGAP39     | NM_025251    | Rho GTPase activating protein 39                                  | -2.9829621 down |
| LOC646498    | NM_001080528 | uncharacterized LOC646498                                         | -3.8746393 down |
| SP9          | NM_001145250 | Sp9 transcription factor homolog (mouse)                          | -2.0920312 down |
|              |              |                                                                   | -2.6245832 down |
|              |              |                                                                   | -2.7872555 down |
| SNORA70B     | BQ029156     | small nucleolar RNA, H/ACA box 70B (retrotransposed)              | -2.2352493 down |
|              | AK128215     |                                                                   | -2.1363661 down |
|              | BX093647     |                                                                   | -2.2324064 down |
| OR2T4        | NM_001004696 | olfactory receptor, family 2, subfamily T, member 4               | -2.253095 down  |
| TBC1D28      | NM_001039397 | TBC1 domain family, member 28                                     | -2.87844 down   |
| C3orf54      | NM_203370    | chromosome 3 open reading frame 54                                | -2.4272845 down |
| LOC100129048 | AK128074     | uncharacterized LOC100129048                                      | -2.5689895 down |
| C1orf61      | NM_006365    | chromosome 1 open reading frame 61                                | -2.1435628 down |
| SSX4B        | NM_001034832 | synovial sarcoma, X breakpoint 4B                                 | -4.047795 down  |
| PDXDC2P      | BX647358     | pyridoxal-dependent decarboxylase domain containing 2, pseudogene | -4.094984 down  |
| RNF150       | NM_020724    | ring finger protein 150                                           | -5.1244707 down |
| LOC647983    | AK126828     | uncharacterized LOC647983                                         | -4.8871355 down |
| GOLGA2P2Y    | NR_001555    | golgin A2 pseudogene 2, Y-linked                                  | -2.5211184 down |
| LINC00314    | NR_027246    | long intergenic non-protein coding RNA 314                        | -2.2244236 down |
| LRRC46       | NM_033413    | leucine rich repeat containing 46                                 | -2.0385394 down |
| DGCR10       | NR_026651    | DiGeorge syndrome critical region gene 10                         | -3.6058676 down |
|              | AK094155     |                                                                   | -5.0520654 down |
| LENG9        | NM_198988    | leukocyte receptor cluster (LRC) member 9                         | -2.007832 down  |
| C16orf3      | NM_001214    | chromosome 16 open reading frame 3                                | -5.961076 down  |
| CMKLR1       | NM_004072    | chemokine-like receptor 1                                         | -2.3664968 down |
| RPL32P3      | NR_003111    | ribosomal protein L32 pseudogene 3                                | -2.1416872 down |
| UMODL1       | NM_001199528 | uromodulin-like 1                                                 | -4.0061846 down |
| PCDHB8       | NM_019120    | protocadherin beta 8                                              | -2.515205 down  |
| SIX3         | NM_005413    | SIX homeobox 3                                                    | -3.9609032 down |
| AGFG2        | NM_006076    | ArfGAP with FG repeats 2                                          | -2.0649567 down |
| OR2AT4       | NM_001005285 | olfactory receptor, family 2, subfamily AT, member 4              | -3.5410466 down |
| SEC24A       | NM_001252231 | SEC24 family, member A (S. cerevisiae)                            | -2.012962 down  |
| LRRC19       | NM_022901    | leucine rich repeat containing 19                                 | -3.5081592 down |
| TSSK1B       | NM_032028    | testis-specific serine kinase 1B                                  | -2.1378126 down |
|              |              |                                                                   | -2.7558503 down |
| ARMS2        | NM_001099667 | age-related maculopathy susceptibility 2                          | -2.514969 down  |
| PAX2         | NM_003990    | paired box 2                                                      | -4.706431 down  |
| LOC284014    | AK095567     | uncharacterized LOC284014                                         | -3.6832788 down |
|              |              |                                                                   | -3.682595 down  |

|              |              |                                                                              |                 |
|--------------|--------------|------------------------------------------------------------------------------|-----------------|
|              |              |                                                                              | -3.0128133 down |
| INMT         | NM_001199219 | indoletylamine N-methyltransferase                                           | -4.5414267 down |
| KIAA1257     | NM_020741    | KIAA1257                                                                     | -2.6012099 down |
| STRC         | NM_153700    | stereocilin                                                                  | -2.3872378 down |
|              |              |                                                                              | -2.4237964 down |
|              |              |                                                                              | -2.1300905 down |
| C7orf61      | NM_001004323 | chromosome 7 open reading frame 61                                           | -4.073289 down  |
| RNASET2      | AK124363     | ribonuclease T2                                                              | -5.269457 down  |
| PRIC285      | BC104974     | peroxisomal proliferator-activated receptor A interacting complex 285        | -2.3447983 down |
|              | AF220263     |                                                                              | -2.933544 down  |
| LOC339539    | BC043541     | uncharacterized LOC339539                                                    | -2.9785721 down |
| LOC100289079 | XM_002344448 | 60S ribosomal protein L36-like                                               | -2.9898376 down |
| OR7G2        | NM_001005193 | olfactory receptor, family 7, subfamily G, member 2                          | -2.5025396 down |
| PAPPA        | NM_002581    | pregnancy-associated plasma protein A, pappalysin 1                          | -2.2928572 down |
| KRTAP19-1    | NM_181607    | keratin associated protein 19-1                                              | -6.9071665 down |
|              |              |                                                                              | -3.9675622 down |
|              |              |                                                                              | -2.0686378 down |
| SLC2A11      |              | solute carrier family 2 (facilitated glucose transporter), member 11         | -2.0024207 down |
| MAGEC2       | NM_016249    | melanoma antigen family C, 2                                                 | -3.9414883 down |
| ZNF248       | BC021819     | zinc finger protein 248                                                      | -2.340402 down  |
| GAFA2        | AF220234     | FGF-2 activity-associated protein 2                                          | -2.0031347 down |
| SULT4A1      | NM_014351    | sulfotransferase family 4A, member 1                                         | -3.5427861 down |
| DCUN1D2      | NM_001014283 | DCN1, defective in cullin neddylation 1, domain containing 2 (S. cerevisiae) | -3.6211264 down |
| LOC283483    | XR_109153    | uncharacterized LOC283483                                                    | -2.9179118 down |
|              |              |                                                                              | -2.3440614 down |
| LOC100506191 | XM_003118995 | uncharacterized protein LOC100506191                                         | -2.304706 down  |
| PRDX4        |              | peroxiredoxin 4                                                              | -2.0758712 down |
|              |              |                                                                              | -2.5028021 down |
|              | XR_109614    |                                                                              | -2.616706 down  |
| GPSM1        | NM_015597    | G-protein signaling modulator 1                                              | -3.4216862 down |
| C2CD4D       | NM_001136003 | C2 calcium-dependent domain containing 4D                                    | -2.1858833 down |
| FAM171A1     | NM_001010924 | family with sequence similarity 171, member A1                               | -2.046398 down  |
| HIST1H4E     | NM_003545    | histone cluster 1, H4e                                                       | -2.8773859 down |
| HCAR1        | NM_032554    | hydroxycarboxylic acid receptor 1                                            | -2.687955 down  |
|              | BG957402     |                                                                              | -2.1933568 down |
| ZDHHC8P1     | NR_003950    | zinc finger, DHHC-type containing 8 pseudogene 1                             | -3.9944594 down |
| IKBKB        | AK309052     | inhibitor of kappa light polypeptide gene enhancer in B-cells, kinase beta   | -2.0707302 down |
| LOC727677    | NR_024393    | uncharacterized LOC727677                                                    | -2.752713 down  |
|              | XR_132803    |                                                                              | -3.951643 down  |
| CDHR5        | NM_031264    | cadherin-related family member 5                                             | -2.1542735 down |

|              |              |                                                                    |                 |
|--------------|--------------|--------------------------------------------------------------------|-----------------|
| TNFSF11      | NM_003701    | tumor necrosis factor (ligand) superfamily, member 11              | -3.0199182 down |
|              | AB529275     |                                                                    | -2.7506073 down |
|              | BC069659     |                                                                    | -3.5412123 down |
| FFAR3        | NM_005304    | free fatty acid receptor 3                                         | -2.4922762 down |
| BBS5         | NM_152384    | Bardet-Biedl syndrome 5                                            | -3.3318424 down |
| LOC100133091 | NR_029411    | uncharacterized LOC100133091                                       | -3.6314611 down |
| LOC100130256 | AK127400     | uncharacterized LOC100130256                                       | -2.3596847 down |
| HCP5B        | BC035659     | HLA complex P5B (non-protein coding)                               | -2.2379448 down |
| MBL1P        | NR_002724    | mannose-binding lectin (protein A) 1, pseudogene                   | -2.250458 down  |
| C17orf46     | NM_152343    | chromosome 17 open reading frame 46                                | -2.1616297 down |
| OR2D3        | NM_001004684 | olfactory receptor, family 2, subfamily D, member 3                | -2.0092852 down |
| OR52W1       | NM_001005178 | olfactory receptor, family 52, subfamily W, member 1               | -2.0155756 down |
| HIST1H4L     | NM_003546    | histone cluster 1, H4l                                             | -2.3230183 down |
| POLR3G       | NM_006467    | polymerase (RNA) III (DNA directed) polypeptide G (32kD)           | -4.865662 down  |
|              | AK128523     |                                                                    | -3.2098026 down |
|              |              |                                                                    | -2.2627273 down |
| SHROOM4      | NM_020717    | shroom family member 4                                             | -2.698823 down  |
| KIAA1598     | NM_018330    | KIAA1598                                                           | -2.2871034 down |
| TMEM31       | NM_182541    | transmembrane protein 31                                           | -2.569111 down  |
|              |              |                                                                    | -3.6364934 down |
| ZNF81        | BC039609     | zinc finger protein 81                                             | -2.6136913 down |
| CHN2         | NM_004067    | chimerin (chimaerin) 2                                             | -3.0664074 down |
| ODF2L        | NM_001007022 | outer dense fiber of sperm tails 2-like                            | -2.6571915 down |
|              | XR_109707    |                                                                    | -3.4660625 down |
| FOXD1        | NM_004472    | forkhead box D1                                                    | -2.342332 down  |
| LOC100131581 | AK092544     | uncharacterized LOC100131581                                       | -3.0167692 down |
| GDF10        | NM_004962    | growth differentiation factor 10                                   | -3.432062 down  |
| SLC35F2      | NM_017515    | solute carrier family 35, member F2                                | -4.473814 down  |
| ORAOV1       | BC133014     | oral cancer overexpressed 1                                        | -2.090473 down  |
| LOC729080    | NR_033244    | glycine cleavage system protein H (aminomethyl carrier) pseudogene | -4.1445174 down |
| TSPEAR       | NM_144991    | thrombospondin-type laminin G domain and EAR repeats               | -2.1994097 down |
| GPR157       | NM_024980    | G protein-coupled receptor 157                                     | -2.2411687 down |
| GOLGA6L10    | NM_001164465 | golgin A6 family-like 10                                           | -6.690217 down  |
|              |              |                                                                    | -3.3173008 down |
| TIAL1        | AB209260     | TIA1 cytotoxic granule-associated RNA binding protein-like 1       | -2.5260284 down |
| LOC100509196 | XM_003119833 | putative uncharacterized protein encoded by NCRNA00205-like        | -2.068929 down  |
| LOC100128653 | XR_108727    | uncharacterized LOC100128653                                       | -2.6321714 down |
| GUCA2B       | NM_007102    | guanylate cyclase activator 2B (uroguanylin)                       | -2.9069526 down |
| LOC440461    | NR_027283    | Rho GTPase activating protein 27 pseudogene                        | -2.007196 down  |
| LOC728073    | AL833395     | uncharacterized LOC728073                                          | -4.232102 down  |
| PMP22        |              | peripheral myelin protein 22                                       | -2.4203575 down |

|              |              |                                                            |                 |
|--------------|--------------|------------------------------------------------------------|-----------------|
| ADAM12       | NM_003474    | ADAM metallopeptidase domain 12                            | -5.179927 down  |
| PCBP3-OT1    | AK126016     | PCBP3 overlapping transcript (non-protein coding)          | -4.1296663 down |
| KRTAP4-7     | NM_033061    | keratin associated protein 4-7                             | -3.3598876 down |
| FLJ14186     | NR_037596    | uncharacterized LOC401149                                  | -2.7129662 down |
| GUSBP1       | BC048193     | glucuronidase, beta pseudogene 1                           | -2.2719307 down |
| UNC5B        | NM_170744    | unc-5 homolog B (C. elegans)                               | -2.1709328 down |
| DCAF8L1      | NM_001017930 | DDB1 and CUL4 associated factor 8-like 1                   | -6.1747327 down |
| GRIK4        | NM_014619    | glutamate receptor, ionotropic, kainate 4                  | -2.8932836 down |
| CPLX2        | NM_006650    | complexin 2                                                | -3.1547675 down |
| MYO3A        | NM_017433    | myosin IIIA                                                | -2.2685955 down |
| IL12RB2      | NM_001559    | interleukin 12 receptor, beta 2                            | -5.004351 down  |
| VSX2         | NM_182894    | visual system homeobox 2                                   | -2.1575124 down |
| PPYR1        | NM_005972    | pancreatic polypeptide receptor 1                          | -6.171576 down  |
| LIPH         | NM_139248    | lipase, member H                                           | -2.40887 down   |
| KRTAP12-4    | NM_198698    | keratin associated protein 12-4                            | -2.4018989 down |
| MARK4        | NM_031417    | MAP/microtubule affinity-regulating kinase 4               | -2.1273403 down |
| TSPAN16      | NM_012466    | tetraspanin 16                                             | -2.495093 down  |
| LOC283112    | AK096599     | uncharacterized LOC283112                                  | -2.6387324 down |
| HSD52        | NR_027120    | uncharacterized LOC729467                                  | -5.547237 down  |
| TMEM229B     | AK090706     | transmembrane protein 229B                                 | -2.2130513 down |
| LOC399939    | NM_001206627 | ring finger protein 18-like                                | -2.3608165 down |
| LOC100288884 | AK124122     | uncharacterized LOC100288884                               | -2.2172356 down |
| LOC729444    | NR_038388    | uncharacterized LOC729444                                  | -4.8642063 down |
| AKAP14       | NM_001008535 | A kinase (PRKA) anchor protein 14                          | -3.7163653 down |
| ZDHC14       | NM_153746    | zinc finger, DHHC-type containing 14                       | -2.3946958 down |
| COL6A2       | NM_058174    | collagen, type VI, alpha 2                                 | -3.7234235 down |
| PPP6R1       | NM_014931    | protein phosphatase 6, regulatory subunit 1                | -2.61771 down   |
| LOC100507055 | NM_001195520 | uncharacterized LOC100507055                               | -2.2731335 down |
| LRRC2        | NM_024512    | leucine rich repeat containing 2                           | -3.7880533 down |
| HAUS6        |              | HAUS augmin-like complex, subunit 6                        | -2.3316307 down |
|              | BC094791     |                                                            | -4.936049 down  |
| ABCC6        | NM_001079528 | ATP-binding cassette, sub-family C (CFTR/MRP), member 6    | -2.1946075 down |
| COL23A1      | NM_173465    | collagen, type XXIII, alpha 1                              | -4.1076794 down |
| DSCR10       | NR_027695    | Down syndrome critical region gene 10 (non-protein coding) | -2.3465993 down |
| ARNT2        | NM_014862    | aryl-hydrocarbon receptor nuclear translocator 2           | -2.4980407 down |
| WNT9A        | NM_003395    | wingless-type MMTV integration site family, member 9A      | -4.523501 down  |
| CALY         |              | calcyon neuron-specific vesicular protein                  | -3.672476 down  |
|              |              |                                                            | -2.4781842 down |
|              |              |                                                            | -3.2764416 down |

|              |              |                                                                       |                 |
|--------------|--------------|-----------------------------------------------------------------------|-----------------|
| TAS2R60      | NM_177437    | taste receptor, type 2, member 60                                     | -7.17155 down   |
|              | AK091409     |                                                                       | -2.1723459 down |
| LOC440297    | NR_033579    | chondroitin sulfate proteoglycan 4 pseudogene                         | -4.108693 down  |
| FLJ34223     | AK091542     | uncharacterized LOC440479                                             | -3.636388 down  |
|              |              |                                                                       | -2.0357 down    |
| NXPH3        | NM_007225    | neurexophilin 3                                                       | -5.9469247 down |
| CDKN1B       | NM_004064    | cyclin-dependent kinase inhibitor 1B (p27, Kip1)                      | -2.750145 down  |
| FOSL1        | NM_005438    | FOS-like antigen 1                                                    | -2.878679 down  |
| ODAM         | NM_017855    | odontogenic, ameloblast associated                                    | -2.316448 down  |
| RPA4         | NM_013347    | replication protein A4, 30kDa                                         | -5.7699113 down |
|              | AK056269     |                                                                       | -2.6885736 down |
| LOC151475    | NR_040038    | uncharacterized LOC151475                                             | -2.0918717 down |
| BEND4        | NM_207406    | BEN domain containing 4                                               | -2.7898242 down |
|              | M15530       |                                                                       | -3.8116748 down |
| B4GALNT1     | NM_001478    | beta-1,4-N-acetyl-galactosaminyl transferase 1                        | -4.1517744 down |
| LOC100131107 | XM_001715471 | UPF0607 protein ENSP00000383783-like                                  | -2.6409407 down |
| INTU         | NM_015693    | inturned planar cell polarity effector homolog (Drosophila)           | -2.0360618 down |
| GPT          | NM_005309    | glutamic-pyruvate transaminase (alanine aminotransferase)             | -12.025615 down |
| POF1B        | NM_024921    | premature ovarian failure, 1B                                         | -3.9651456 down |
|              | XR_109175    |                                                                       | -11.882804 down |
| FGF22        | NM_020637    | fibroblast growth factor 22                                           | -2.0708148 down |
| HEATR4       | NM_203309    | HEAT repeat containing 4                                              | -2.7644792 down |
| OR10R3P      | AK122667     | olfactory receptor, family 10, subfamily R, member 3 pseudogene       | -2.766414 down  |
| OR2M7        | NM_001004691 | olfactory receptor, family 2, subfamily M, member 7                   | -3.0194101 down |
| EMX1         | BC037242     | empty spiracles homeobox 1                                            | -2.7129996 down |
| MST1P9       | NR_002729    | macrophage stimulating 1 (hepatocyte growth factor-like) pseudogene 9 | -3.6798 down    |
| RGMA         | NM_020211    | RGM domain family, member A                                           | -2.797557 down  |
| LHX1         | NM_005568    | LIM homeobox 1                                                        | -16.453512 down |
|              |              |                                                                       | -3.8611047 down |
| CSDC2        | NM_014460    | cold shock domain containing C2, RNA binding                          | -2.2499437 down |
| GMNC         | NM_001146686 | geminin coiled-coil domain containing                                 | -2.2894156 down |
| LOC100287314 | NR_040245    | uncharacterized LOC100287314                                          | -2.8990226 down |
| GNN          | NR_027249    | Grp94 neighboring nucleotidase pseudogene                             | -3.0765047 down |
|              | AK130724     |                                                                       | -3.0144577 down |
| ZSCAN30      | AK131291     | zinc finger and SCAN domain containing 30                             | -2.432667 down  |
|              | AK130932     |                                                                       | -2.50488 down   |
|              | DA666023     |                                                                       | -5.5206895 down |
| PAX8         | NM_003466    | paired box 8                                                          | -2.3970957 down |
| IGFN1        | NM_001164586 | immunoglobulin-like and fibronectin type III domain containing 1      | -2.936139 down  |
| SNORA60      | BF304636     | small nucleolar RNA, H/ACA box 60                                     | -24.101852 down |
| TAB3         | AL832071     | TGF-beta activated kinase 1/MAP3K7 binding protein 3                  | -2.0841086 down |

|              |              |                                                                      |                 |
|--------------|--------------|----------------------------------------------------------------------|-----------------|
| DNAI1        | NM_012144    | dynein, axonemal, intermediate chain 1                               | -2.885911 down  |
| DMTF1        | NR_024549    | cyclin D binding myb-like transcription factor 1                     | -2.3297913 down |
| OR2T6        | NM_001005471 | olfactory receptor, family 2, subfamily T, member 6                  | -2.9359596 down |
|              | AK093659     |                                                                      | -2.2367468 down |
| EYA2         | NM_005244    | eyes absent homolog 2 (Drosophila)                                   | -3.1323988 down |
| APOA1        | NM_000039    | apolipoprotein A-I                                                   | -2.5555198 down |
| RNU105B      | NR_004386    | RNA, U105B small nucleolar                                           | -2.052073 down  |
|              | XM_003118494 |                                                                      | -2.7944076 down |
| GOLGA8A      | NM_181077    | golgin A8 family, member A                                           | -3.1745539 down |
| ARHGEF26     | NM_015595    | Rho guanine nucleotide exchange factor (GEF) 26                      | -2.2591317 down |
|              |              |                                                                      | -2.0300515 down |
| GOLT1A       | NM_198447    | golgi transport 1A                                                   | -2.2550058 down |
| LOC402160    | NM_001193282 | uncharacterized LOC402160                                            | -2.94199 down   |
| ZBTB8B       | NM_001145720 | zinc finger and BTB domain containing 8B                             | -2.5661407 down |
| MAGI2        | NM_012301    | membrane associated guanylate kinase, WW and PDZ domain containing 2 | -2.0878015 down |
| MIR17HG      | NR_027350    | miR-17-92 cluster host gene (non-protein coding)                     | -4.278801 down  |
| FAM166A      | AK097419     | family with sequence similarity 166, member A                        | -3.26692 down   |
| NLRP7        | NM_139176    | NLR family, pyrin domain containing 7                                | -2.6873498 down |
| C1orf61      | BC054045     | chromosome 1 open reading frame 61                                   | -4.1522026 down |
| ARHGAP23     | NM_001199417 | Rho GTPase activating protein 23                                     | -2.0313954 down |
| CDHR3        | NM_152750    | cadherin-related family member 3                                     | -2.9512844 down |
| OR1J1        | NM_001004451 | olfactory receptor, family 1, subfamily J, member 1                  | -2.8675408 down |
| PSG11        | NM_002785    | pregnancy specific beta-1-glycoprotein 11                            | -2.0961835 down |
| RREB1        | NM_001003699 | ras responsive element binding protein 1                             | -2.9915798 down |
|              |              |                                                                      | -4.0586104 down |
|              |              |                                                                      | -3.7115092 down |
| LOC100508383 | XM_003119910 | uncharacterized LOC100508383                                         | -2.0231652 down |
| MACROD2      | BC035876     | MACRO domain containing 2                                            | -3.7093298 down |
| LOC442132    | NR_033906    | golgin A6 family-like 1 pseudogene                                   | -2.6582966 down |
|              |              |                                                                      | -4.7340984 down |
| PITX2        | NM_153426    | paired-like homeodomain 2                                            | -3.0472758 down |
|              |              |                                                                      | -3.4793699 down |
| LOC100652742 | XR_132763    | uncharacterized LOC100652742                                         | -4.4878373 down |
| LHX9         | NM_020204    | LIM homeobox 9                                                       | -3.2342193 down |
| GPR179       | NM_001004334 | G protein-coupled receptor 179                                       | -3.5796883 down |
| TPH2         | NM_173353    | tryptophan hydroxylase 2                                             | -7.6923847 down |
| MAPK15       | NM_139021    | mitogen-activated protein kinase 15                                  | -2.5821118 down |
| MOB3B        | NM_024761    | MOB kinase activator 3B                                              | -3.4244726 down |
| GPR98        | NM_032119    | G protein-coupled receptor 98                                        | -4.3317847 down |

|              |              |                                                               |                 |
|--------------|--------------|---------------------------------------------------------------|-----------------|
| AQP4         | NM_001650    | aquaporin 4                                                   | -3.0286992 down |
| MPL          | NM_005373    | myeloproliferative leukemia virus oncogene                    | -2.378023 down  |
| FBLN1        | NM_001996    | fibulin 1                                                     | -6.499015 down  |
|              |              |                                                               | -2.2055886 down |
| PPP1R27      | NM_001007533 | protein phosphatase 1, regulatory subunit 27                  | -5.269405 down  |
|              |              |                                                               | -2.184193 down  |
| LOC286442    | NR_038968    | uncharacterized LOC286442                                     | -2.328914 down  |
| SPEN         | NM_015001    | spen homolog, transcriptional regulator (Drosophila)          | -5.6074247 down |
|              |              |                                                               | -2.3358502 down |
| FAM75A3      | NM_001083124 | family with sequence similarity 75, member A3                 | -3.3604574 down |
| OR4C6        | NM_001004704 | olfactory receptor, family 4, subfamily C, member 6           | -11.45397 down  |
| FBXW10       | NM_031456    | F-box and WD repeat domain containing 10                      | -4.3554344 down |
|              |              |                                                               | -3.2773993 down |
|              |              |                                                               | -4.1436296 down |
| CACNA1B      | NM_000718    | calcium channel, voltage-dependent, N type, alpha 1B subunit  | -4.9678426 down |
| RNASE12      | NM_001024822 | ribonuclease, RNase A family, 12 (non-active)                 | -2.7973037 down |
| APC          | NM_001127511 | adenomatous polyposis coli                                    | -2.182364 down  |
|              | CR625008     |                                                               | -4.1678476 down |
| SPON2        | AK124606     | spondin 2, extracellular matrix protein                       | -2.3445394 down |
|              |              |                                                               | -3.3159459 down |
| LOC731932    | XM_001716667 | uncharacterized LOC731932                                     | -3.8089678 down |
| RGS8         | NM_033345    | regulator of G-protein signaling 8                            | -2.525994 down  |
|              |              |                                                               | -2.0902019 down |
| LOC100130587 | AK127527     | uncharacterized LOC100130587                                  | -2.3164892 down |
| LOC646482    | BC015677     | uncharacterized LOC646482                                     | -2.8813436 down |
| RAP1GAP      | NM_002885    | RAP1 GTPase activating protein                                | -3.1807668 down |
| LOC100130539 | XM_001724322 | uncharacterized LOC100130539                                  | -2.0935957 down |
|              |              |                                                               | -2.2228973 down |
| KCNJ14       | NM_170720    | potassium inwardly-rectifying channel, subfamily J, member 14 | -2.4246068 down |
| ENTPD1       | NM_001776    | ectonucleoside triphosphate diphosphohydrolase 1              | -2.13871 down   |
| LOC286177    | NR_038874    | uncharacterized LOC286177                                     | -2.1548452 down |
|              |              |                                                               | -2.7265215 down |
| FSHR         | NM_000145    | follicle stimulating hormone receptor                         | -2.267113 down  |
| GPM6B        | NM_001001995 | glycoprotein M6B                                              | -2.3533 down    |
| ARHGAP23     | NM_001199417 | Rho GTPase activating protein 23                              | -3.3287895 down |
|              |              |                                                               | -3.0666175 down |
|              |              |                                                               | -3.3255405 down |
| PGM5         | NM_021965    | phosphoglucomutase 5                                          | -2.2664988 down |
| KRT19P2      | NR_036685    | keratin 19 pseudogene 2                                       | -2.1444669 down |
| CBX2         | NM_032647    | chromobox homolog 2                                           | -2.165092 down  |
| CERCAM       | NM_016174    | cerebral endothelial cell adhesion molecule                   | -2.907789 down  |



|              |              |                                                                                        |                 |
|--------------|--------------|----------------------------------------------------------------------------------------|-----------------|
| KAAG1        | NM_181337    | kidney associated antigen 1                                                            | -2.9201388 down |
| FBXL7        | NM_012304    | F-box and leucine-rich repeat protein 7                                                | -2.2919905 down |
| LOC100130581 | AK127427     | uncharacterized LOC100130581                                                           | -2.4430544 down |
| ULBP2        | NM_025217    | UL16 binding protein 2                                                                 | -3.1869807 down |
| SERPINA4     | NM_006215    | serpin peptidase inhibitor, clade A (alpha-1 antiproteinase, antitrypsin), member 4    | -3.599843 down  |
| ELK1         | NM_001114123 | ELK1, member of ETS oncogene family                                                    | -8.91259 down   |
| ANKRD20A8P   | NR_003366    | ankyrin repeat domain 20 family, member A8, pseudogene                                 | -4.333573 down  |
| RCE1         | NM_005133    | RCE1 homolog, prenyl protein peptidase ( <i>S. cerevisiae</i> )                        | -2.8645515 down |
|              |              |                                                                                        | -2.201137 down  |
| PIP5K1A      | NM_003557    | phosphatidylinositol-4-phosphate 5-kinase, type I, alpha                               | -4.3902464 down |
|              |              |                                                                                        | -2.8960779 down |
| SPTBN4       | NM_020971    | spectrin, beta, non-erythrocytic 4                                                     | -3.9215827 down |
|              |              |                                                                                        | -3.4587607 down |
| DCD          | NM_053283    | dermcidin                                                                              | -2.4074175 down |
| HHIP         | NM_022475    | hedgehog interacting protein                                                           | -3.1273031 down |
| SHC3         | NM_016848    | SHC (Src homology 2 domain containing) transforming protein 3                          | -2.0452006 down |
| CCDC108      | NM_152389    | coiled-coil domain containing 108                                                      | -2.321727 down  |
| LOC283731    | BC050067     | uncharacterized LOC283731                                                              | -3.443976 down  |
| TSGA10       | NM_025244    | testis specific, 10                                                                    | -2.2358823 down |
| SLC25A10     | NM_012140    | solute carrier family 25 (mitochondrial carrier; dicarboxylate transporter), member 10 | -2.608613 down  |
| LINC00281    | NR_027278    | long intergenic non-protein coding RNA 281                                             | -3.6202443 down |
| EXTL1        | NM_004455    | exostoses (multiple)-like 1                                                            | -4.033939 down  |
| FAM22A       | NM_001099338 | family with sequence similarity 22, member A                                           | -2.6953962 down |
| SOX3         | NM_005634    | SRY (sex determining region Y)-box 3                                                   | -3.300588 down  |
|              |              |                                                                                        | -2.9207594 down |
| PHLDB3       | AK097512     | pleckstrin homology-like domain, family B, member 3                                    | -2.2092724 down |
|              |              |                                                                                        | -3.443294 down  |
| USH1C        | NM_005709    | Usher syndrome 1C (autosomal recessive, severe)                                        | -2.880904 down  |
|              | AL117481     |                                                                                        | -2.611336 down  |
|              | AK123118     |                                                                                        | -6.6710963 down |
| ZNF331       |              | zinc finger protein 331                                                                | -3.0107036 down |
| LRRC3        | NM_030891    | leucine rich repeat containing 3                                                       | -2.853224 down  |
| PDGFRA       | NM_006206    | platelet-derived growth factor receptor, alpha polypeptide                             | -2.2322545 down |
| DPF3         | AK024141     | D4, zinc and double PHD fingers, family 3                                              | -2.080736 down  |
| FLJ38379     | XR_108456    | uncharacterized FLJ38379                                                               | -2.0375452 down |
| FAM27A       | NR_024060    | family with sequence similarity 27, member A                                           | -4.4144225 down |
|              |              |                                                                                        | -2.9267063 down |
|              |              |                                                                                        | -2.0754888 down |
|              | BC041650     |                                                                                        | -3.5388305 down |
| PRAMEF22     | NM_001100631 | PRAME family member 22                                                                 | -2.1726177 down |

|             |              |                                                                 |            |      |
|-------------|--------------|-----------------------------------------------------------------|------------|------|
| NFASC       | NM_001005388 | neurofascin                                                     | -6.7971063 | down |
|             | AK022609     |                                                                 | -2.005248  | down |
|             |              |                                                                 | -2.634412  | down |
|             |              |                                                                 | -2.4412186 | down |
|             | AK123308     |                                                                 | -2.1073499 | down |
|             | AK056600     |                                                                 | -2.2421494 | down |
|             | CU678159     |                                                                 | -3.3637216 | down |
| LOC441204   | NR_015364    | uncharacterized LOC441204                                       | -3.853323  | down |
| ABCB9       | NM_019625    | ATP-binding cassette, sub-family B (MDR/TAP), member 9          | -2.612492  | down |
| EML5        | NM_183387    | echinoderm microtubule associated protein like 5                | -9.253154  | down |
| LOC200726   | NM_001102659 | hCG1657980                                                      | -5.9616265 | down |
|             |              |                                                                 | -2.2873392 | down |
| BSX         | NM_001098169 | brain-specific homeobox                                         | -2.4991012 | down |
| HSPA8       |              | heat shock 70kDa protein 8                                      | -3.1697426 | down |
| CASKIN1     | NM_020764    | CASK interacting protein 1                                      | -2.277006  | down |
| DGCR5       | NR_002733    | DiGeorge syndrome critical region gene 5 (non-protein coding)   | -2.143334  | down |
| NEUROG1     | NM_006161    | neurogenin 1                                                    | -3.1397324 | down |
| KIRREL3-AS3 | NR_040078    | KIRREL3 antisense RNA 3 (non-protein coding)                    | -5.0667768 | down |
|             |              |                                                                 | -2.6659617 | down |
| DLK1        | NM_003836    | delta-like 1 homolog (Drosophila)                               | -2.7227533 | down |
| RAPH1       | NM_213589    | Ras association (RalGDS/AF-6) and pleckstrin homology domains 1 | -2.3589814 | down |
| PHLDA3      | NM_012396    | pleckstrin homology-like domain, family A, member 3             | -2.6204505 | down |
| CIITA       | NM_000246    | class II, major histocompatibility complex, transactivator      | -2.8290663 | down |
|             |              |                                                                 | -4.9868937 | down |
| ZC3H11A     | BX648271     | zinc finger CCCH-type containing 11A                            | -3.0538406 | down |
| NTRK2       | NM_006180    | neurotrophic tyrosine kinase, receptor, type 2                  | -2.1302247 | down |
| PAX5        | NM_016734    | paired box 5                                                    | -2.3719497 | down |
| LOC116437   | NR_026670    | uncharacterized LOC116437                                       | -4.1206765 | down |
| NAT8L       | NM_178557    | N-acetyltransferase 8-like (GCN5-related, putative)             | -2.6935322 | down |
| GLRA1       | NM_000171    | glycine receptor, alpha 1                                       | -2.484067  | down |
| RNU105C     | NR_004385    | RNA, U105C small nucleolar                                      | -7.9807844 | down |
| KIF6        | NM_145027    | kinesin family member 6                                         | -2.2739236 | down |
| AZGP1       | NM_001185    | alpha-2-glycoprotein 1, zinc-binding                            | -2.3737552 | down |
| IKZF2       | NM_001079526 | IKAROS family zinc finger 2 (Helios)                            | -2.5392673 | down |
|             |              |                                                                 | -3.2232668 | down |
|             |              |                                                                 | -2.107883  | down |
| C1orf95     | NM_001003665 | chromosome 1 open reading frame 95                              | -2.5306077 | down |
| CHEK2       | NM_145862    | checkpoint kinase 2                                             | -2.01323   | down |
|             |              |                                                                 | -3.9305325 | down |
| SCN8A       | NM_014191    | sodium channel, voltage gated, type VIII, alpha subunit         | -2.4663725 | down |
| FLJ44054    | NR_024609    | uncharacterized LOC643365                                       | -2.4761572 | down |

|           |              |                                                                                                |                 |
|-----------|--------------|------------------------------------------------------------------------------------------------|-----------------|
| C6orf138  | NM_001013732 | chromosome 6 open reading frame 138                                                            | -2.5933256 down |
|           |              |                                                                                                | -4.5568705 down |
| PDE4DIP   | NM_001198832 | phosphodiesterase 4D interacting protein                                                       | -5.6383185 down |
| LOC401188 | AK091013     | uncharacterized LOC401188                                                                      | -2.4214504 down |
| GOLGA6L10 | NM_001164465 | golgin A6 family-like 10                                                                       | -7.4029164 down |
| CEP55     | NM_018131    | centrosomal protein 55kDa                                                                      | -2.0650635 down |
| SH3GL1P2  | NR_033420    | SH3-domain GRB2-like 1 pseudogene 2                                                            | -4.760231 down  |
| MYO18B    | NM_032608    | myosin XVIIIIB                                                                                 | -2.263577 down  |
|           | XM_003119553 |                                                                                                | -2.3404934 down |
|           |              |                                                                                                | -2.827184 down  |
|           |              |                                                                                                | -3.1189828 down |
| AACSP1    | NR_024035    | acetoacetyl-CoA synthetase pseudogene 1                                                        | -8.845006 down  |
|           |              |                                                                                                | -2.2812047 down |
| POM121L9P | NR_003714    | POM121 membrane glycoprotein-like 9, pseudogene                                                | -3.0508938 down |
| FLJ16779  | NR_024389    | uncharacterized LOC100192386                                                                   | -2.0264542 down |
| GALNT5    | NM_014568    | UDP-N-acetyl-alpha-D-galactosamine:polypeptide N-acetylgalactosaminyltransferase 5 (GalNAc-T5) | -3.2798953 down |
|           | AK075182     |                                                                                                | -2.2564356 down |
| ANKRD20A4 | XM_003403822 | ankyrin repeat domain 20 family, member A4                                                     | -5.3436694 down |
| LOC441179 | XR_112948    | uncharacterized LOC441179                                                                      | -4.5668626 down |
| C19orf44  | NM_032207    | chromosome 19 open reading frame 44                                                            | -2.042961 down  |
|           |              |                                                                                                | -2.1753078 down |
| MPP3      | NM_001932    | membrane protein, palmitoylated 3 (MAGUK p55 subfamily member 3)                               | -3.2927377 down |
| SLC38A8   | NM_001080442 | solute carrier family 38, member 8                                                             | -2.4864526 down |
| MYADML2   | NM_001145113 | myeloid-associated differentiation marker-like 2                                               | -2.3721561 down |
| TBC1D3B   | NM_001001417 | TBC1 domain family, member 3B                                                                  | -2.961522 down  |
|           | AF068294     |                                                                                                | -3.0097098 down |
| NPB       | NM_148896    | neuropeptide B                                                                                 | -2.6334124 down |
| RUNX1     | NM_001122607 | runt-related transcription factor 1                                                            | -4.8424187 down |
|           |              |                                                                                                | -3.8398585 down |
| GLB1L3    | NM_001080407 | galactosidase, beta 1-like 3                                                                   | -2.0269883 down |
| LOC143286 | AL049428     | uncharacterized LOC143286                                                                      | -3.7336493 down |
|           | AF495723     |                                                                                                | -3.4110782 down |
|           | BC039440     |                                                                                                | -4.5986185 down |
|           |              |                                                                                                | -2.2632632 down |
| LINC00111 | NR_024367    | long intergenic non-protein coding RNA 111                                                     | -6.9616804 down |
| LOC644246 | NR_034172    | uncharacterized LOC644246                                                                      | -2.919609 down  |
| MCART6    | NM_001012755 | mitochondrial carrier triple repeat 6                                                          | -2.0241315 down |
| BSPRY     | NM_017688    | B-box and SPRY domain containing                                                               | -2.912585 down  |
| NFATC2    | NM_173091    | nuclear factor of activated T-cells, cytoplasmic, calcineurin-dependent 2                      | -3.1096048 down |
|           | AF116680     |                                                                                                | -3.4316304 down |

|              |              |                                                                      |                 |
|--------------|--------------|----------------------------------------------------------------------|-----------------|
| MGC15705     | BC007304     | uncharacterized protein MGC15705                                     | -2.3447604 down |
| DAZ1         | NM_004081    | deleted in azoospermia 1                                             | -2.696044 down  |
| BAALC        |              | brain and acute leukemia, cytoplasmic                                | -2.5718036 down |
|              |              |                                                                      | -2.9526112 down |
|              |              |                                                                      | -2.9310122 down |
|              |              |                                                                      | -3.3041184 down |
| PRSS47       | XR_108978    | protease, serine, 47                                                 | -2.9740458 down |
| LOC100130278 | AK094114     | uncharacterized LOC100130278                                         | -2.6810272 down |
| MYLK3        | NM_182493    | myosin light chain kinase 3                                          | -2.6045861 down |
|              | CD674797     |                                                                      | -2.2103498 down |
| KCNH6        | NM_173092    | potassium voltage-gated channel, subfamily H (eag-related), member 6 | -3.789919 down  |
| C7orf31      | NM_138811    | chromosome 7 open reading frame 31                                   | -2.5165324 down |
| LOC441268    | AK125166     | uncharacterized LOC441268                                            | -2.662963 down  |
| ASB15        | NM_080928    | ankyrin repeat and SOCS box containing 15                            | -2.018217 down  |
| LOC100128501 | AK092192     | uncharacterized LOC100128501                                         | -2.9409704 down |
| TWIST2       | BC103755     | twist homolog 2 (Drosophila)                                         | -2.13133 down   |
| CHN2         | AK294216     | chimerin (chimaerin) 2                                               | -2.1265008 down |
| OPRL1        | NM_182647    | opiate receptor-like 1                                               | -3.7429655 down |
|              | CR597597     |                                                                      | -2.713801 down  |
| FAM83F       | NM_138435    | family with sequence similarity 83, member F                         | -2.2759414 down |
| TRIM11       | AK074623     | tripartite motif containing 11                                       | -2.0618768 down |
| LOC389033    | NR_026740    | placenta-specific 9 pseudogene                                       | -3.116613 down  |
| PANX2        | NM_052839    | pannexin 2                                                           | -3.5234835 down |
| LOC100129148 | NR_033999    | uncharacterized LOC100129148                                         | -3.8475778 down |
| VPS37D       | NM_001077621 | vacuolar protein sorting 37 homolog D (S. cerevisiae)                | -2.6878357 down |
| ZC3H12D      | NM_207360    | zinc finger CCCH-type containing 12D                                 | -6.3925047 down |
| LOC440346    | BC035163     | uncharacterized LOC440346                                            | -2.5741751 down |
| GPR133       | NM_198827    | G protein-coupled receptor 133                                       | -3.547708 down  |
|              |              |                                                                      | -2.664155 down  |
| NCAPG        | NM_022346    | non-SMC condensin I complex, subunit G                               | -2.4537015 down |
| NTNG2        | AY358165     | netrin G2                                                            | -6.8432245 down |
| HS1BP3       | BC057389     | HCLS1 binding protein 3                                              | -3.9806798 down |
|              | XM_003119477 |                                                                      | -2.4544106 down |
| FAM123A      | NM_152704    | family with sequence similarity 123A                                 | -2.0918944 down |
| ADRA1B       | NM_000679    | adrenergic, alpha-1B-, receptor                                      | -2.8089519 down |
| EXOC7        | AK022397     | exocyst complex component 7                                          | -2.4090416 down |
| GJD4         | BC035898     | gap junction protein, delta 4, 40.1kDa                               | -6.991357 down  |
| CRYBA2       | NM_005209    | crystallin, beta A2                                                  | -2.7679296 down |
| C22orf42     | NM_001010859 | chromosome 22 open reading frame 42                                  | -3.8820403 down |
| LOC100128105 | XM_001721678 | uncharacterized LOC100128105                                         | -2.01934 down   |
| RUFY4        | NM_198483    | RUN and FYVE domain containing 4                                     | -3.057439 down  |

|           |              |                                                                              |                 |
|-----------|--------------|------------------------------------------------------------------------------|-----------------|
| CPNE1     | NM_003915    | copine I                                                                     | -2.9326484 down |
| LOC285300 | AK095655     | uncharacterized LOC285300                                                    | -3.0888019 down |
| TSG1      | NR_015362    | tumor suppressor TSG1                                                        | -2.380016 down  |
|           |              |                                                                              | -4.532669 down  |
|           | AF130091     |                                                                              | -2.0109074 down |
| REG3A     | NM_138938    | regenerating islet-derived 3 alpha                                           | -2.559145 down  |
| NPLOC4    | AB040932     | nuclear protein localization 4 homolog ( <i>S. cerevisiae</i> )              | -2.1306121 down |
| ONECUT3   | NM_001080488 | one cut homeobox 3                                                           | -3.3143384 down |
| PRSS8     | NM_002773    | protease, serine, 8                                                          | -4.0148997 down |
| C17orf105 | NM_001136483 | chromosome 17 open reading frame 105                                         | -2.9773674 down |
| LYZL1     | NM_032517    | lysozyme-like 1                                                              | -4.044266 down  |
|           | AB305689     |                                                                              | -2.2967505 down |
| ZNF682    | NM_033196    | zinc finger protein 682                                                      | -3.902928 down  |
| TTLL6     | NM_173623    | tubulin tyrosine ligase-like family, member 6                                | -3.057029 down  |
| CYP2C18   | NM_000772    | cytochrome P450, family 2, subfamily C, polypeptide 18                       | -2.4119344 down |
|           | AK124325     |                                                                              | -2.5298648 down |
| C2orf53   | NM_178553    | chromosome 2 open reading frame 53                                           | -2.0435889 down |
| TSPY26P   | NR_002781    | testis specific protein, Y-linked 26, pseudogene                             | -2.7128167 down |
|           |              |                                                                              | -2.9023128 down |
| POTEB     | NM_207355    | POTE ankyrin domain family, member B                                         | -4.1299067 down |
| LARP4B    | NM_015155    | La ribonucleoprotein domain family, member 4B                                | -2.2183692 down |
| PROX2     | NM_001243007 | prospero homeobox 2                                                          | -5.0145664 down |
|           | AF390550     |                                                                              | -2.703168 down  |
| FAM188B   | AK090826     | family with sequence similarity 188, member B                                | -2.0660553 down |
| FLJ42392  | NR_033877    | uncharacterized LOC400123                                                    | -2.267029 down  |
| HMGB3P1   | NR_002165    | high mobility group box 3 pseudogene 1                                       | -3.4973514 down |
| SPC24     | AK075287     | SPC24, NDC80 kinetochore complex component, homolog ( <i>S. cerevisiae</i> ) | -2.3197775 down |
| LOC646508 | NM_001195187 | family with sequence similarity 90, member A1-like                           | -3.0373304 down |
| MEGF11    | NM_032445    | multiple EGF-like-domains 11                                                 | -4.04248 down   |
| ZP4       | NM_021186    | zona pellucida glycoprotein 4                                                | -2.7163396 down |
| MAT1A     | NM_000429    | methionine adenosyltransferase I, alpha                                      | -3.4326124 down |
| SH2D4B    | NM_207372    | SH2 domain containing 4B                                                     | -3.135691 down  |
| GH1       | NM_000515    | growth hormone 1                                                             | -2.542353 down  |
| ERO1LB    |              | ERO1-like beta ( <i>S. cerevisiae</i> )                                      | -2.0460145 down |
| CYCSP52   | NR_001560    | cytochrome c, somatic pseudogene 52                                          | -2.7928193 down |
|           |              |                                                                              | -3.0524366 down |
| LOC729739 | BC013681     | peptidylprolyl isomerase A (cyclophilin A) pseudogene                        | -3.0480518 down |
|           |              |                                                                              | -2.0485036 down |
| ARHGEF4   | NM_015320    | Rho guanine nucleotide exchange factor (GEF) 4                               | -2.0614185 down |
| MAGEC1    | NM_005462    | melanoma antigen family C, 1                                                 | -3.344572 down  |

|              |              |                                                                      |                 |
|--------------|--------------|----------------------------------------------------------------------|-----------------|
|              |              |                                                                      | -2.0052109 down |
|              |              |                                                                      | -3.5126047 down |
| LOC100130372 | AK127532     | uncharacterized LOC100130372                                         | -2.0686522 down |
| LOC402779    | NR_038372    | uncharacterized LOC402779                                            | -2.2035089 down |
| STAG2        | NM_001042751 | stromal antigen 2                                                    | -2.3683817 down |
| CALCA        | NM_001033952 | calcitonin-related polypeptide alpha                                 | -2.9556026 down |
| LOC100131170 | AK098403     | uncharacterized LOC100131170                                         | -3.704955 down  |
| UCP3         | NM_022803    | uncoupling protein 3 (mitochondrial, proton carrier)                 | -3.1229603 down |
| S100A7A      | AY189119     | S100 calcium binding protein A7A                                     | -3.0437043 down |
| TMEM99       | NM_001195386 | transmembrane protein 99                                             | -2.2920058 down |
| SATB2        | NM_015265    | SATB homeobox 2                                                      | -2.0754857 down |
|              |              |                                                                      | -2.615217 down  |
| VSTM2L       | NM_080607    | V-set and transmembrane domain containing 2 like                     | -6.580755 down  |
| LOC100128176 | NR_038408    | uncharacterized LOC100128176                                         | -2.3471353 down |
| C4orf50      | XM_003118524 | chromosome 4 open reading frame 50                                   | -3.3959832 down |
|              |              |                                                                      | -3.8274066 down |
|              |              |                                                                      | -8.7195015 down |
| MATN4        | NM_003833    | matrilin 4                                                           | -2.2093909 down |
| MYH7B        | NM_020884    | myosin, heavy chain 7B, cardiac muscle, beta                         | -2.909175 down  |
|              |              |                                                                      | -3.4789088 down |
| TMEM132C     | NM_001136103 | transmembrane protein 132C                                           | -2.8326926 down |
| GPC6         | NM_005708    | glypican 6                                                           | -2.7232473 down |
| LOC100128950 | AK124198     | uncharacterized LOC100128950                                         | -3.310135 down  |
|              |              |                                                                      | -8.349956 down  |
| LOC729911    | NR_038997    | uncharacterized LOC729911                                            | -3.3559012 down |
| C2orf16      | NM_032266    | chromosome 2 open reading frame 16                                   | -7.9584894 down |
| STON2        | NM_033104    | stonin 2                                                             | -2.5440195 down |
| CEP72        | NM_018140    | centrosomal protein 72kDa                                            | -2.883138 down  |
| PLA2G2D      | NM_012400    | phospholipase A2, group IID                                          | -2.4678793 down |
| MAGEA11      | NM_001011544 | melanoma antigen family A, 11                                        | -2.2949226 down |
|              | AJ276252     |                                                                      | -2.196858 down  |
| TRPM3        | NM_206948    | transient receptor potential cation channel, subfamily M, member 3   | -4.561398 down  |
| FICD         | NM_007076    | FIC domain containing                                                | -3.2580085 down |
| LOC100132356 | NR_034127    | uncharacterized LOC100132356                                         | -2.5004866 down |
| HTRA3        | NM_053044    | HtrA serine peptidase 3                                              | -2.380205 down  |
|              |              |                                                                      | -4.2568326 down |
| BTBD19       | NM_001136537 | BTB (POZ) domain containing 19                                       | -3.4949558 down |
|              |              |                                                                      | -2.3657763 down |
| PRAMEF4      | NM_001009611 | PRAME family member 4                                                | -5.2520337 down |
| LOC442366    | XM_001714957 | uncharacterized LOC442366                                            | -2.0368047 down |
| FCER1G       |              | Fc fragment of IgE, high affinity I, receptor for; gamma polypeptide | -2.0450554 down |

|              |              |                                                                                       |                 |
|--------------|--------------|---------------------------------------------------------------------------------------|-----------------|
| OPRM1        | NM_001008504 | opioid receptor, mu 1                                                                 | -2.3947942 down |
| FLJ13224     | NR_026806    | uncharacterized LOC79857                                                              | -2.504551 down  |
| CELSR2       | NM_001408    | cadherin, EGF LAG seven-pass G-type receptor 2 (flamingo homolog, Drosophila)         | -2.1288154 down |
| UBE2I        |              | ubiquitin-conjugating enzyme E2I                                                      | -3.1578462 down |
| SLC5A7       | NM_021815    | solute carrier family 5 (choline transporter), member 7                               | -2.2359223 down |
| FLJ44674     | AK128747     | FLJ44674 protein                                                                      | -2.497909 down  |
| LOC100506485 | XR_110000    | uncharacterized LOC100506485                                                          | -2.507636 down  |
| PCSK1N       | NM_013271    | proprotein convertase subtilisin/kexin type 1 inhibitor                               | -4.017537 down  |
|              |              |                                                                                       | -2.2224689 down |
| OR52E2       | NM_001005164 | olfactory receptor, family 52, subfamily E, member 2                                  | -12.850661 down |
|              |              |                                                                                       | -2.2948582 down |
|              | AK128779     |                                                                                       | -3.1691606 down |
|              |              |                                                                                       | -2.450457 down  |
| ANKRD30BL    | NR_027019    | ankyrin repeat domain 30B-like                                                        | -3.9171348 down |
| MGC72080     | NR_002822    | MGC72080 pseudogene                                                                   | -2.4167578 down |
| C7orf54      | NR_027330    | chromosome 7 open reading frame 54                                                    | -5.7121572 down |
| ZNF295-AS1   | NR_027273    | ZNF295 antisense RNA 1 (non-protein coding)                                           | -2.1244316 down |
| LOC284276    | NR_015417    | uncharacterized LOC284276                                                             | -2.149846 down  |
| C9orf170     | NM_001001709 | chromosome 9 open reading frame 170                                                   | -2.194299 down  |
| KRT18        | NM_000224    | keratin 18                                                                            | -2.544059 down  |
| LOC284939    | AK094442     | uncharacterized LOC284939                                                             | -2.5421364 down |
|              | XR_110101    |                                                                                       | -2.663046 down  |
| KRT24        | NM_019016    | keratin 24                                                                            | -3.9864826 down |
| CBWD7        | AK097639     | COBW domain containing 7                                                              | -2.050406 down  |
|              |              |                                                                                       | -3.2997575 down |
| IL23R        | NM_144701    | interleukin 23 receptor                                                               | -2.009516 down  |
| LYPD1        | NM_144586    | LY6/PLAUR domain containing 1                                                         | -3.1973336 down |
| LOC100131257 | NR_034022    | zinc finger protein 655 pseudogene                                                    | -2.0795376 down |
| ZP3          | NM_007155    | zona pellucida glycoprotein 3 (sperm receptor)                                        | -3.2205937 down |
| ELMOD3       | NM_001135021 | ELMO/CED-12 domain containing 3                                                       | -6.2250795 down |
| BBOX1        | NM_003986    | butyrobetaine (gamma), 2-oxoglutarate dioxygenase (gamma-butyrobetaine hydroxylase) 1 | -2.249721 down  |
|              |              |                                                                                       | -3.4104838 down |
| NRIP2        | NM_031474    | nuclear receptor interacting protein 2                                                | -3.1240985 down |
| PLEKHH3      | NM_024927    | pleckstrin homology domain containing, family H (with MyTH4 domain) member 3          | -6.09917 down   |
| CAMKK1       | NM_172207    | calcium/calmodulin-dependent protein kinase kinase 1, alpha                           | -2.2565734 down |
| SPEG         | NM_005876    | SPEG complex locus                                                                    | -4.6148615 down |
| ELOVL3       | NM_152310    | ELOVL fatty acid elongase 3                                                           | -2.1939065 down |
| CYP11B1      | NM_000497    | cytochrome P450, family 11, subfamily B, polypeptide 1                                | -4.0354156 down |
| ALDH3B2      | NM_000695    | aldehyde dehydrogenase 3 family, member B2                                            | -2.7727742 down |
|              |              |                                                                                       | -2.5169075 down |

|              |              |                                                                     |                 |
|--------------|--------------|---------------------------------------------------------------------|-----------------|
| LOC390660    | AK131095     | FLJ00317 protein                                                    | -2.0108864 down |
|              |              |                                                                     | -2.4875305 down |
| LOC100130009 | XM_001718914 | high mobility group protein HMG-I/HMG-Y-like                        | -2.1222732 down |
| PRKCG        | NM_002739    | protein kinase C, gamma                                             | -2.5764086 down |
| GRID2IP      | NM_001145118 | glutamate receptor, ionotropic, delta 2 (Grid2) interacting protein | -2.5105624 down |
| ALDH4A1      | NM_003748    | aldehyde dehydrogenase 4 family, member A1                          | -2.0557659 down |
| NEU2         | NM_005383    | sialidase 2 (cytosolic sialidase)                                   | -2.152409 down  |
| FLJ42200     | AK124194     | FLJ42200 protein                                                    | -2.5985951 down |
| PSG1         | NM_006905    | pregnancy specific beta-1-glycoprotein 1                            | -2.1910615 down |
|              | CR745051     |                                                                     | -3.053713 down  |
| LINC00302    | CU449054     | long intergenic non-protein coding RNA 302                          | -2.149412 down  |
| DKKL1        | NM_014419    | dickkopf-like 1                                                     | -2.145298 down  |
| ACACB        | NM_001093    | acetyl-CoA carboxylase beta                                         | -2.1251402 down |
|              |              |                                                                     | -3.4992864 down |
| C1orf140     | NR_024236    | uncharacterized LOC400804                                           | -5.214493 down  |
| EMILIN3      | NM_052846    | elastin microfibril interfacier 3                                   | -2.0795846 down |
| PPIAL4G      | AK123006     | peptidylprolyl isomerase A (cyclophilin A)-like 4G                  | -3.2630737 down |
| CLDN24       | NM_001185149 | claudin 24                                                          | -2.027146 down  |
| EFHC2        | NM_025184    | EF-hand domain (C-terminal) containing 2                            | -2.1857426 down |
|              | XR_109271    |                                                                     | -3.1493418 down |
| C14orf41     | AK055876     | chromosome 14 open reading frame 41                                 | -4.465653 down  |
| ESYT3        | NM_031913    | extended synaptotagmin-like protein 3                               | -2.027996 down  |
| ANKRD1       | NM_014391    | ankyrin repeat domain 1 (cardiac muscle)                            | -2.058246 down  |
|              | XM_001727011 |                                                                     | -2.1015105 down |
| GJA8         | NM_005267    | gap junction protein, alpha 8, 50kDa                                | -2.649914 down  |
|              |              |                                                                     | -2.8283353 down |
| OR5AS1       | NM_001001921 | olfactory receptor, family 5, subfamily AS, member 1                | -6.8833327 down |
| MGC12982     | NR_026878    | uncharacterized protein MGC12982                                    | -2.1788409 down |
| PRAMEF15     | NM_001098376 | PRAME family member 15                                              | -3.3328235 down |
|              | DA797466     |                                                                     | -3.3040235 down |
| EGFL6        | NM_001167890 | EGF-like-domain, multiple 6                                         | -2.9807382 down |
| KALRN        | AK131379     | kalirin, RhoGEF kinase                                              | -7.722789 down  |
| HSD17B2      | NM_002153    | hydroxysteroid (17-beta) dehydrogenase 2                            | -2.275334 down  |
| RS1          | NM_000330    | retinoschisin 1                                                     | -2.5032353 down |
| RAI1         | NM_030665    | retinoic acid induced 1                                             | -2.3887513 down |
| TTL13        | NM_001029964 | tubulin tyrosine ligase-like family, member 13                      | -2.9083288 down |
| ALPK1        | AK026323     | alpha-kinase 1                                                      | -2.2010942 down |
| SERPING1     | NM_000062    | serpin peptidase inhibitor, clade G (C1 inhibitor), member 1        | -4.2205234 down |
| NXN          | BC104634     | nucleoredoxin                                                       | -2.1891823 down |
| C2orf27B     | NM_214461    | chromosome 2 open reading frame 27B                                 | -3.303043 down  |
| LOC284561    | XR_112106    | uncharacterized LOC284561                                           | -4.23857 down   |



|              |              |                                                                      |                 |
|--------------|--------------|----------------------------------------------------------------------|-----------------|
| AOX1         | NM_001159    | aldehyde oxidase 1                                                   | -2.0797276 down |
| GPRIN1       | NM_052899    | G protein regulated inducer of neurite outgrowth 1                   | -2.8827758 down |
|              |              |                                                                      | -2.142824 down  |
| LOC100127946 | XM_001717040 | uncharacterized LOC100127946                                         | -2.1503267 down |
| KNCN         | NM_001097611 | kinocilin                                                            | -2.725823 down  |
| LOC100128682 | NR_040046    | uncharacterized LOC100128682                                         | -2.454104 down  |
| BTC          | NM_001729    | betacellulin                                                         | -2.8819747 down |
| MLNR         | NM_001507    | motilin receptor                                                     | -2.2022471 down |
| LINC00265    | NR_026999    | long intergenic non-protein coding RNA 265                           | -10.263503 down |
| FAM46B       | NM_052943    | family with sequence similarity 46, member B                         | -2.3069835 down |
| LOC100131242 | AK124483     | uncharacterized LOC100131242                                         | -3.5512571 down |
|              | CR627384     |                                                                      | -2.2860222 down |
| C22orf24     | NM_015372    | chromosome 22 open reading frame 24                                  | -3.5211573 down |
| SLC2A12      | NM_145176    | solute carrier family 2 (facilitated glucose transporter), member 12 | -3.3910832 down |
| LONRF2       | NM_198461    | LON peptidase N-terminal domain and ring finger 2                    | -3.2625039 down |
| XAGE1A       | NM_001097592 | X antigen family, member 1A                                          | -3.8157604 down |
| SLC35E2      | NM_182838    | solute carrier family 35, member E2                                  | -2.1596966 down |
|              |              |                                                                      | -3.477825 down  |
| KISS1        | NM_002256    | KiSS-1 metastasis-suppressor                                         | -2.3801632 down |
| LOC728613    | NR_003713    | programmed cell death 6 pseudogene                                   | -4.9963565 down |
| SPATA13      | AK092754     | spermatogenesis associated 13                                        | -3.1779885 down |
| LIPG         | NM_006033    | lipase, endothelial                                                  | -2.2022915 down |
| MATN1        | NM_002379    | matrilin 1, cartilage matrix protein                                 | -2.150094 down  |
| LOC283553    | NR_038358    | uncharacterized LOC283553                                            | -2.2213464 down |
| LOC203274    | BC110369     | uncharacterized LOC203274                                            | -2.9399838 down |
|              |              |                                                                      | -2.74192 down   |
| C6orf170     | NM_152730    | chromosome 6 open reading frame 170                                  | -2.1800516 down |
| TNFAIP8L1    | NM_001167942 | tumor necrosis factor, alpha-induced protein 8-like 1                | -2.8801103 down |
| ATOH7        | NM_145178    | atonal homolog 7 (Drosophila)                                        | -3.0680246 down |
| LOC400706    | XR_111876    | uncharacterized LOC400706                                            | -2.6725647 down |
| DHX30        | NM_014966    | DEAH (Asp-Glu-Ala-His) box polypeptide 30                            | -2.0170038 down |
| KRBA2        | NM_213597    | KRAB-A domain containing 2                                           | -2.636628 down  |
|              |              |                                                                      | -3.1327965 down |
|              | XR_111602    |                                                                      | -2.1665819 down |
| LOC285758    | NR_038863    | uncharacterized LOC285758                                            | -6.7411222 down |
| BEGAIN       | NM_001159531 | brain-enriched guanylate kinase-associated homolog (rat)             | -2.8482418 down |
| IFITM5       | NM_001025295 | interferon induced transmembrane protein 5                           | -3.7229087 down |
| PDXDC2P      | NR_003610    | pyridoxal-dependent decarboxylase domain containing 2, pseudogene    | -4.043652 down  |
|              |              |                                                                      | -4.615257 down  |
| SRPX         | NM_006307    | sushi-repeat containing protein, X-linked                            | -2.3670316 down |
|              |              |                                                                      | -2.0965304 down |

|           |              |                                                         |                 |
|-----------|--------------|---------------------------------------------------------|-----------------|
| C4orf38   | NR_024008    | chromosome 4 open reading frame 38                      | -2.3429992 down |
| HMBOX1    |              | homeobox containing 1                                   | -4.5809073 down |
| CDH24     | NM_022478    | cadherin 24, type 2                                     | -8.422184 down  |
| SIGLEC16  | NR_002825    | sialic acid binding Ig-like lectin 16 (gene/pseudogene) | -2.8121698 down |
| ICMT      | BC017037     | isoprenylcysteine carboxyl methyltransferase            | -2.7361953 down |
| PRSS50    | NM_013270    | protease, serine, 50                                    | -2.275281 down  |
|           |              |                                                         | -2.977569 down  |
|           |              |                                                         | -2.0973783 down |
| FRMD4A    | AK001072     | FERM domain containing 4A                               | -5.5562153 down |
| RYR2      | NM_001035    | ryanodine receptor 2 (cardiac)                          | -2.3227167 down |
| GPR114    |              | G protein-coupled receptor 114                          | -2.4407423 down |
|           | AF251048     |                                                         | -2.819039 down  |
| ANKMY2    | NM_020319    | ankyrin repeat and MYND domain containing 2             | -2.540638 down  |
| UBAP2L    | NM_014847    | ubiquitin associated protein 2-like                     | -2.8346689 down |
|           | XR_110878    |                                                         | -2.3498874 down |
|           |              |                                                         | -3.8640091 down |
| C5orf25   | AK299336     | chromosome 5 open reading frame 25                      | -2.1877909 down |
| PGC       | NM_002630    | progastricsin (pepsinogen C)                            | -3.787712 down  |
| ANKRD33B  | NM_001164440 | ankyrin repeat domain 33B                               | -2.1035476 down |
| LOC392364 | NR_040117    | chromosome 15 open reading frame 2 pseudogene           | -4.0242825 down |
| SH3BGRL3  | NM_031286    | SH3 domain binding glutamic acid-rich protein like 3    | -2.6298208 down |
| TMSB4Y    | NM_004202    | thymosin beta 4, Y-linked                               | -2.4894464 down |
|           |              |                                                         | -4.641126 down  |
| C19orf80  | NM_018687    | chromosome 19 open reading frame 80                     | -2.9006255 down |
| PRELID2   | NM_138492    | PRELI domain containing 2                               | -2.567545 down  |
| AQP2      | NM_000486    | aquaporin 2 (collecting duct)                           | -2.2700171 down |
| C21orf116 | AF130090     | chromosome 21 open reading frame 116                    | -2.12819 down   |
|           | AK002210     |                                                         | -2.419726 down  |
| PARP10    | NM_032789    | poly (ADP-ribose) polymerase family, member 10          | -3.0117638 down |
| LOC728558 | NR_038444    | uncharacterized LOC728558                               | -2.0298798 down |
|           | DA967691     |                                                         | -3.8911455 down |
| C1orf95   | NM_001003665 | chromosome 1 open reading frame 95                      | -2.8651948 down |
| PLAC4     | NM_182832    | placenta-specific 4                                     | -2.899971 down  |
| MUC22     | NM_001198815 | mucin 22                                                | -2.2997468 down |
| ASS1      | NM_000050    | argininosuccinate synthase 1                            | -2.3587267 down |
| FBXO44    | NM_001014765 | F-box protein 44                                        | -2.8412106 down |
| HSPA12B   | NM_052970    | heat shock 70kD protein 12B                             | -6.8582325 down |
| MREG      | NM_018000    | melanoregulin                                           | -2.5230293 down |
| AIM1L     | NM_001039775 | absent in melanoma 1-like                               | -2.0896115 down |
| CLDN9     | NM_020982    | claudin 9                                               | -2.3201125 down |
|           | AK055281     |                                                         | -6.856401 down  |

|               |              |                                                        |                 |
|---------------|--------------|--------------------------------------------------------|-----------------|
|               |              |                                                        | -3.6521168 down |
| RARB          | NM_000965    | retinoic acid receptor, beta                           | -2.0805387 down |
| HOXA2         | NM_006735    | homeobox A2                                            | -7.2102246 down |
| SCNN1D        | NM_001130413 | sodium channel, nonvoltage-gated 1, delta              | -2.8304255 down |
|               | AK126599     |                                                        | -2.2630346 down |
|               |              |                                                        | -2.512548 down  |
| ADSSL1        | NM_199165    | adenylosuccinate synthase like 1                       | -2.6370478 down |
| ADH4          | NM_000670    | alcohol dehydrogenase 4 (class II), pi polypeptide     | -5.839934 down  |
| LOC153811     | AK021734     | uncharacterized LOC153811                              | -2.077881 down  |
| ZNF750        | NM_024702    | zinc finger protein 750                                | -2.2620246 down |
| GDA           | NM_004293    | guanine deaminase                                      | -2.3238697 down |
| DKFZP547J0410 | AL050263     | DKFZP547J0410 protein                                  | -2.1034982 down |
| ANKRD20A5P    | NR_040113    | ankyrin repeat domain 20 family, member A5, pseudogene | -3.301266 down  |
| LOC100132474  | AK125160     | uncharacterized LOC100132474                           | -4.3550954 down |
|               |              |                                                        | -2.1240373 down |
| TEKT5         | NM_144674    | tektin 5                                               | -2.1575022 down |
|               | AK055264     |                                                        | -4.298498 down  |
| CYTH1         | AK123894     | cytohesin 1                                            | -3.669139 down  |
| C14orf23      | NR_026731    | chromosome 14 open reading frame 23                    | -2.0129092 down |
|               |              |                                                        | -3.1985557 down |
| NPHS2         | NM_014625    | nephrosis 2, idiopathic, steroid-resistant (podocin)   | -2.0273662 down |
| PLCE1         | NM_016341    | phospholipase C, epsilon 1                             | -4.449349 down  |
|               |              |                                                        | -2.488993 down  |
|               |              |                                                        | -3.2373679 down |
| HOXD3         | NM_006898    | homeobox D3                                            | -4.82493 down   |
| C16orf78      | NM_144602    | chromosome 16 open reading frame 78                    | -2.8015893 down |
|               |              |                                                        | -3.0303025 down |
|               | XR_133518    |                                                        | -6.628003 down  |
|               | AK130638     |                                                        | -3.8447871 down |
| TRIM49        | NM_020358    | tripartite motif containing 49                         | -2.952903 down  |
| CARD10        | NM_014550    | caspase recruitment domain family, member 10           | -2.5354111 down |
| CDK20         | NM_001039803 | cyclin-dependent kinase 20                             | -2.9887044 down |
| ITGB1BP2      | NM_012278    | integrin beta 1 binding protein (melusin) 2            | -3.6831837 down |
| HILS1         | NR_024193    | histone linker H1 domain, spermatid-specific 1         | -2.1705287 down |
| MTHFR         | NM_005957    | methylenetetrahydrofolate reductase (NAD(P)H)          | -2.239424 down  |
|               | AK096952     |                                                        | -4.0018263 down |
| FIGNL2        | NM_001013690 | fidgetin-like 2                                        | -7.0376697 down |
| FLJ16126      | XR_109873    | uncharacterized LOC645010                              | -2.6852047 down |
|               | AK094078     |                                                        | -2.536136 down  |
|               |              |                                                        | -2.242781 down  |

|           |              |                                                               |                 |
|-----------|--------------|---------------------------------------------------------------|-----------------|
| DDX51     | NM_175066    | DEAD (Asp-Glu-Ala-Asp) box polypeptide 51                     | -2.1429496 down |
|           | AK093172     |                                                               | -2.1346881 down |
|           |              |                                                               | -3.0330968 down |
| FLJ45079  | NR_028337    | FLJ45079 protein                                              | -2.9329846 down |
| FAM188B   | NM_032222    | family with sequence similarity 188, member B                 | -2.7789786 down |
|           |              |                                                               | -2.2357159 down |
| TTC9B     | NM_152479    | tetratricopeptide repeat domain 9B                            | -5.811311 down  |
|           | XM_003403546 |                                                               | -2.5914798 down |
| BAALC     |              | brain and acute leukemia, cytoplasmic                         | -3.4983406 down |
| GJB1      | NM_000166    | gap junction protein, beta 1, 32kDa                           | -2.311607 down  |
|           | AK129520     |                                                               | -3.1529033 down |
| LOC255177 | BC031230     | uncharacterized LOC255177                                     | -5.7813587 down |
| CACNG7    | NM_031896    | calcium channel, voltage-dependent, gamma subunit 7           | -2.189293 down  |
| SEC14L3   | NM_174975    | SEC14-like 3 ( <i>S. cerevisiae</i> )                         | -2.3337786 down |
|           |              |                                                               | -2.272156 down  |
| AQP7P1    | NR_002817    | aquaporin 7 pseudogene 1                                      | -5.191415 down  |
|           |              |                                                               | -4.2666173 down |
|           |              |                                                               | -2.1274254 down |
| EVPLL     | NM_001145127 | envoplakin-like                                               | -2.7900255 down |
| MYB       | AJ616798     | v-myb myeloblastosis viral oncogene homolog (avian)           | -2.402128 down  |
|           | AY043127     |                                                               | -3.5069249 down |
| CYP3A7    | NM_000765    | cytochrome P450, family 3, subfamily A, polypeptide 7         | -2.7026408 down |
| SLC4A11   | NM_032034    | solute carrier family 4, sodium borate transporter, member 11 | -3.8291397 down |
| DDX11     | NM_152438    | DEAD/H (Asp-Glu-Ala-Asp/His) box polypeptide 11               | -2.8795123 down |
|           |              |                                                               | -6.0088816 down |
| TNR       | NM_003285    | tenascin R (restrictin, janusin)                              | -3.688181 down  |
| CDH26     | AF169690     | cadherin 26                                                   | -2.5530965 down |
| WEE2      | NM_001105558 | WEE1 homolog 2 ( <i>S. pombe</i> )                            | -2.0671835 down |
| LOC283140 | AK095275     | uncharacterized LOC283140                                     | -2.5002172 down |
| STARD13   | AY082592     | StAR-related lipid transfer (START) domain containing 13      | -6.3124475 down |
| KRTAP22-1 | BC101686     | keratin associated protein 22-1                               | -2.193338 down  |
| HIP1      | AY358103     | huntingtin interacting protein 1                              | -4.580367 down  |
| SPINT3    | NM_006652    | serine peptidase inhibitor, Kunitz type, 3                    | -2.1773279 down |
| TRAF      | NM_005879    | TRAF interacting protein                                      | -2.61517 down   |
|           |              |                                                               | -2.0892658 down |
| MSLNL     | NM_001025190 | mesothelin-like                                               | -2.3094718 down |
|           |              |                                                               | -4.216011 down  |
|           |              |                                                               | -3.1852612 down |
| RSG1      | NM_030907    | REM2 and RAB-like small GTPase 1                              | -2.7162266 down |
| KATNAL2   | NM_031303    | katanin p60 subunit A-like 2                                  | -3.7840579 down |
| LRRC27    | NM_001143757 | leucine rich repeat containing 27                             | -2.0007784 down |

|              |              |                                                                             |                 |
|--------------|--------------|-----------------------------------------------------------------------------|-----------------|
|              |              |                                                                             | -3.4921243 down |
| CASC5        | NM_170589    | cancer susceptibility candidate 5                                           | -2.6278677 down |
| LOC100287326 | XM_002343311 | uncharacterized LOC100287326                                                | -2.037475 down  |
|              | BC007984     |                                                                             | -3.7753386 down |
| SLC6A7       | NM_014228    | solute carrier family 6 (neurotransmitter transporter, L-proline), member 7 | -2.0562637 down |
| LOC284628    | AK094692     | uncharacterized LOC284628                                                   | -2.0210927 down |
|              |              |                                                                             | -2.4951174 down |
| ZBTB46       | NM_025224    | zinc finger and BTB domain containing 46                                    | -2.4187608 down |
| OR4P4        | NM_001004124 | olfactory receptor, family 4, subfamily P, member 4                         | -2.0618207 down |
| BPIFA1       | NM_130852    | BPI fold containing family A, member 1                                      | -2.1941106 down |
|              |              |                                                                             | -2.262546 down  |
|              |              |                                                                             | -2.0420282 down |
| ARHGAP33     | AY044864     | Rho GTPase activating protein 33                                            | -3.8457866 down |
|              |              |                                                                             | -2.1764355 down |
| JSRP1        | NM_144616    | junctional sarcoplasmic reticulum protein 1                                 | -2.1416838 down |
| KRTAP21-1    | NM_181619    | keratin associated protein 21-1                                             | -2.2723818 down |
| DCDC2B       | NM_001099434 | doublecortin domain containing 2B                                           | -3.0515325 down |
|              |              |                                                                             | -2.458312 down  |
| LANCL3       | NM_198511    | LanC lantibiotic synthetase component C-like 3 (bacterial)                  | -3.9324112 down |
|              |              |                                                                             | -2.147342 down  |
| POTEA        | NM_001005365 | POTE ankyrin domain family, member A                                        | -2.153182 down  |
| PPP1R12B     | NM_002481    | protein phosphatase 1, regulatory subunit 12B                               | -2.9945374 down |
| FXYD5        | AF177940     | FXYD domain containing ion transport regulator 5                            | -3.351646 down  |
| ZNF833P      | NR_028594    | zinc finger protein 833, pseudogene                                         | -3.2071152 down |
|              |              |                                                                             | -3.576794 down  |
| CD70         | NM_001252    | CD70 molecule                                                               | -2.6214747 down |
| LOC254128    | NR_037857    | uncharacterized LOC254128                                                   | -2.4693296 down |
| FUT5         | NM_002034    | fucosyltransferase 5 (alpha (1,3) fucosyltransferase)                       | -5.0115747 down |
| LOC440910    | NR_030728    | uncharacterized LOC440910                                                   | -2.178331 down  |
| C22orf36     | NM_207644    | chromosome 22 open reading frame 36                                         | -5.2006183 down |
| LOC100130581 | AK127427     | uncharacterized LOC100130581                                                | -2.6120749 down |
|              | XM_003118969 |                                                                             | -2.0362318 down |
| MIR137HG     | AK092728     | MIR137 host gene (non-protein coding)                                       | -3.9423654 down |
| FUT7         | NM_004479    | fucosyltransferase 7 (alpha (1,3) fucosyltransferase)                       | -2.336332 down  |
| RDH8         | NM_015725    | retinol dehydrogenase 8 (all-trans)                                         | -2.9215565 down |
| RBP5         | NM_031491    | retinol binding protein 5, cellular                                         | -3.0047588 down |
|              |              |                                                                             | -3.5357096 down |
| ASPN         | NM_001193335 | asporin                                                                     | -3.1003358 down |
| OSBPL1A      | NM_080597    | oxysterol binding protein-like 1A                                           | -2.3265214 down |
| FILIP1       | NM_015687    | filamin A interacting protein 1                                             | -4.686489 down  |

|              |              |                                                                     |                 |
|--------------|--------------|---------------------------------------------------------------------|-----------------|
| C8G          | NM_000606    | complement component 8, gamma polypeptide                           | -2.109857 down  |
| CLCN2        | NM_004366    | chloride channel 2                                                  | -3.5596416 down |
| LOC100128946 | NR_038944    | uncharacterized LOC100128946                                        | -2.0029652 down |
| TUBB3        | NM_006086    | tubulin, beta 3 class III                                           | -2.9997253 down |
| PNPLA5       | NM_138814    | patatin-like phospholipase domain containing 5                      | -2.1336887 down |
|              |              |                                                                     | -2.929605 down  |
| SSC5D        | NM_001144950 | scavenger receptor cysteine rich domain containing (5 domains)      | -4.202606 down  |
|              |              |                                                                     | -2.1304648 down |
| PDE1C        | NM_005020    | phosphodiesterase 1C, calmodulin-dependent 70kDa                    | -2.0257459 down |
| C10orf57     | NM_025125    | chromosome 10 open reading frame 57                                 | -2.027727 down  |
| STAR         | NM_000349    | steroidogenic acute regulatory protein                              | -2.6234725 down |
| ZNF496       | NM_032752    | zinc finger protein 496                                             | -2.1253622 down |
| KCNK17       | NM_031460    | potassium channel, subfamily K, member 17                           | -2.324354 down  |
| RASGEF1C     | NM_175062    | RasGEF domain family, member 1C                                     | -2.5676343 down |
| LINC00479    | NR_027272    | long intergenic non-protein coding RNA 479                          | -4.0778666 down |
|              | AK127451     |                                                                     | -2.596568 down  |
| LOC730755    | NM_001165252 | keratin associated protein 2-4-like                                 | -2.2337527 down |
| AKR1B15      | NM_001080538 | aldo-keto reductase family 1, member B15                            | -2.1337974 down |
| ADAMTS16     | NM_139056    | ADAM metalloproteinase with thrombospondin type 1 motif, 16         | -3.2559235 down |
| RABEPK       | AL832249     | Rab9 effector protein with kelch motifs                             | -2.7702084 down |
| SLC4A10      | NM_022058    | solute carrier family 4, sodium bicarbonate transporter, member 10  | -2.6917078 down |
| OXCT2        | NM_022120    | 3-oxoacid CoA transferase 2                                         | -2.0726116 down |
| FAM101A      | NM_181709    | family with sequence similarity 101, member A                       | -5.0124717 down |
| AGSK1        | AK026448     | golgin subfamily A member 2-like                                    | -2.4807687 down |
| TRIP13       | NM_004237    | thyroid hormone receptor interactor 13                              | -2.0441926 down |
| MYO5A        | NM_000259    | myosin VA (heavy chain 12, myosin)                                  | -2.0242338 down |
| FAM184A      | BX640728     | family with sequence similarity 184, member A                       | -2.818335 down  |
| SLC4A8       | AK128321     | solute carrier family 4, sodium bicarbonate cotransporter, member 8 | -2.0290713 down |
|              |              |                                                                     | -6.231032 down  |
| MCF2L        | NM_024979    | MCF.2 cell line derived transforming sequence-like                  | -2.4111705 down |
|              | AK130019     |                                                                     | -2.4094837 down |
|              |              |                                                                     | -2.2229578 down |
| OBSCN        | NM_052843    | obscurin, cytoskeletal calmodulin and titin-interacting RhoGEF      | -2.9657788 down |
|              |              |                                                                     | -2.9328835 down |
|              |              |                                                                     | -7.210703 down  |
|              |              |                                                                     | -2.40387 down   |
| PRSS38       | NM_183062    | protease, serine, 38                                                | -4.308838 down  |
| ZDHC20       | BC034944     | zinc finger, DHHC-type containing 20                                | -2.653478 down  |
| OR511        | NM_006637    | olfactory receptor, family 5, subfamily I, member 1                 | -3.0074112 down |
| INE1         | NR_024616    | inactivation escape 1 (non-protein coding)                          | -2.4841604 down |
|              |              |                                                                     | -2.0379684 down |

|              |              |                                                                          |                 |
|--------------|--------------|--------------------------------------------------------------------------|-----------------|
| DRD2         | NM_000795    | dopamine receptor D2                                                     | -2.098226 down  |
| MGAM         |              | maltase-glucoamylase (alpha-glucosidase)                                 | -2.9981947 down |
| LOC643327    | AK096549     | uncharacterized LOC643327                                                | -2.3396132 down |
| CHST9-AS1    | NR_026908    | CHST9 antisense RNA 1 (non-protein coding)                               | -2.2112362 down |
| HOXB13       | NM_006361    | homeobox B13                                                             | -3.7711306 down |
|              | AK126601     |                                                                          | -3.1251743 down |
| LOC400752    | NR_024270    | uncharacterized LOC400752                                                | -2.4061265 down |
| LOC100131043 | AK124222     | uncharacterized LOC100131043                                             | -3.286456 down  |
| IMMT         | NM_001100170 | inner membrane protein, mitochondrial                                    | -2.6078925 down |
| SCNN1G       | NM_001039    | sodium channel, nonvoltage-gated 1, gamma                                | -2.1228693 down |
| PRKXP1       | AI016765     | protein kinase, X-linked, pseudogene 1                                   | -3.530172 down  |
| GFM1         | AK022724     | G elongation factor, mitochondrial 1                                     | -3.4136693 down |
| TEAD3        | NM_003214    | TEA domain family member 3                                               | -2.3171246 down |
|              | AK098012     |                                                                          | -2.547695 down  |
| CNGA4        | NM_001037329 | cyclic nucleotide gated channel alpha 4                                  | -2.4353645 down |
| C19orf47     | NM_178830    | chromosome 19 open reading frame 47                                      | -2.2270744 down |
| TTY5         | NR_001541    | testis-specific transcript, Y-linked 5 (non-protein coding)              | -3.821448 down  |
| NEK11        | NM_145910    | NIMA (never in mitosis gene a)- related kinase 11                        | -2.245152 down  |
| HSP90AB4P    | NR_002927    | heat shock protein 90kDa alpha (cytosolic), class B member 4, pseudogene | -2.056503 down  |
| IL26         | NM_018402    | interleukin 26                                                           | -5.722428 down  |
| FAM197Y2P    | NR_001553    | family with sequence similarity 197, Y-linked, member 2, pseudogene      | -2.8376663 down |
| FLJ41455     | AK123449     | uncharacterized LOC441441                                                | -3.128099 down  |
| DIO2         | NM_013989    | deiodinase, iodothyronine, type II                                       | -2.5414531 down |
| AVPR1B       | NM_000707    | arginine vasopressin receptor 1B                                         | -3.216929 down  |
| FBXL18       | NM_024963    | F-box and leucine-rich repeat protein 18                                 | -2.1857722 down |
|              | CR605662     |                                                                          | -2.1526978 down |
| TYMP         | NM_001113755 | thymidine phosphorylase                                                  | -2.5097065 down |
|              | DB053889     |                                                                          | -3.9369462 down |
| EBPL         | BC073152     | emopamil binding protein-like                                            | -3.1389692 down |
| LOC100128001 | AK125720     | uncharacterized LOC100128001                                             | -5.13357 down   |
|              | AK095132     |                                                                          | -2.3890495 down |
| OR10G2       | NM_001005466 | olfactory receptor, family 10, subfamily G, member 2                     | -3.315201 down  |
| KRT8P41      | NR_027713    | keratin 8 pseudogene 41                                                  | -2.871 down     |
| MGC16275     | NR_026914    | uncharacterized protein MGC16275                                         | -2.3972409 down |
| HES2         | BC012091     | hairy and enhancer of split 2 (Drosophila)                               | -2.0149393 down |
| NPPC         | NM_024409    | natriuretic peptide C                                                    | -2.2403631 down |
| LOC389831    | NM_001242480 | uncharacterized LOC389831                                                | -5.603441 down  |
|              |              |                                                                          | -2.6453834 down |
| LINC00478    | NR_027790    | long intergenic non-protein coding RNA 478                               | -2.1834679 down |
| TMEM177      | AK311734     | transmembrane protein 177                                                | -2.816161 down  |

|              |              |                                                                                         |                 |
|--------------|--------------|-----------------------------------------------------------------------------------------|-----------------|
| HSFX1        | NM_016153    | heat shock transcription factor family, X linked 1                                      | -2.0969775 down |
| GOLGA6L9     | NM_198181    | golgin A6 family-like 9                                                                 | -2.6304502 down |
| OR2L2        | NM_001004686 | olfactory receptor, family 2, subfamily L, member 2                                     | -2.3532882 down |
| POFUT1       | NM_172236    | protein O-fucosyltransferase 1                                                          | -2.8667874 down |
| LOC126536    | NR_026828    | uncharacterized LOC126536                                                               | -2.3260567 down |
|              |              |                                                                                         | -2.3419116 down |
| PARP1        |              | poly (ADP-ribose) polymerase 1                                                          | -2.5167377 down |
| REXO1L1      | NM_172239    | REX1, RNA exonuclease 1 homolog (S. cerevisiae)-like 1                                  | -6.7877603 down |
| ZNF771       | NM_016643    | zinc finger protein 771                                                                 | -2.7068307 down |
|              |              |                                                                                         | -3.81782 down   |
|              |              |                                                                                         | -3.6396644 down |
| TRIM77P      | NM_001146162 | tripartite motif containing 77, pseudogene                                              | -2.2468913 down |
|              |              |                                                                                         | -2.0192826 down |
| BK250D10.8   | NR_024355    | uncharacterized LOC339674                                                               | -2.6002984 down |
| ITPK1-AS1    | NR_002808    | ITPK1 antisense RNA 1 (non-protein coding)                                              | -3.1966882 down |
| CHN2         |              | chimerin (chimaerin) 2                                                                  | -3.3470228 down |
| C19orf26     |              | chromosome 19 open reading frame 26                                                     | -2.6392431 down |
| KRTAP26-1    | NM_203405    | keratin associated protein 26-1                                                         | -2.1406884 down |
|              |              |                                                                                         | -2.2138312 down |
|              |              |                                                                                         | -2.482147 down  |
| STXBPSL      | NM_014980    | syntaxin binding protein 5-like                                                         | -2.0890753 down |
| LOC648044    | XM_001131322 | guanine nucleotide binding protein (G protein), gamma 12-like                           | -2.072355 down  |
|              |              |                                                                                         | -5.4164205 down |
| LOC285103    | BC036597     | uncharacterized LOC285103                                                               | -3.2048664 down |
| ZNF503-AS2   | NR_024421    | ZNF503 antisense RNA 2 (non-protein coding)                                             | -2.3035274 down |
| LOC650293    | NM_001040071 | seven transmembrane helix receptor                                                      | -6.540019 down  |
|              | BC040619     |                                                                                         | -5.4872065 down |
| TAF5L        |              | TAF5-like RNA polymerase II, p300/CBP-associated factor (PCAF)-associated factor, 65kDa | -2.3891914 down |
| MGC39545     | XR_110535    | uncharacterized LOC403312                                                               | -2.1363657 down |
| B4GALNT2     | NM_153446    | beta-1,4-N-acetyl-galactosaminyl transferase 2                                          | -2.0449708 down |
|              |              |                                                                                         | -2.1958797 down |
| POM121L8P    | NR_024583    | POM121 membrane glycoprotein-like 8 pseudogene                                          | -7.818869 down  |
| LOC100506816 | XR_108400    | uncharacterized LOC100506816                                                            | -2.01689 down   |
|              |              |                                                                                         | -2.0610745 down |
| CTPS2        | NM_001144002 | CTP synthase II                                                                         | -2.0952806 down |
| HEATR7B1     | XM_001721240 | HEAT repeat containing 7B1                                                              | -2.594823 down  |
| AKAP1        | NM_003488    | A kinase (PRKA) anchor protein 1                                                        | -6.650966 down  |
|              |              |                                                                                         | -3.730161 down  |
| PAK3         | NM_002578    | p21 protein (Cdc42/Rac)-activated kinase 3                                              | -3.365554 down  |
| FBLN1        | NM_006486    | fibulin 1                                                                               | -3.6865642 down |



|              |              |                                                            |                 |
|--------------|--------------|------------------------------------------------------------|-----------------|
| SPRR2E       | NM_001024209 | small proline-rich protein 2E                              | -2.9355419 down |
|              |              |                                                            | -2.0585797 down |
| C2CD4B       | NM_001007595 | C2 calcium-dependent domain containing 4B                  | -3.2585046 down |
| CHRNA1       | NM_001039523 | cholinergic receptor, nicotinic, alpha 1 (muscle)          | -4.53592 down   |
| CRHR1        | NM_001145148 | corticotropin releasing hormone receptor 1                 | -2.5290244 down |
| TJP2         |              | tight junction protein 2 (zona occludens 2)                | -2.354647 down  |
| TAS2R30      | NM_001097643 | taste receptor, type 2, member 30                          | -2.4881923 down |
| VAX1         | NM_001112704 | ventral anterior homeobox 1                                | -3.3857303 down |
|              |              |                                                            | -5.241445 down  |
|              |              |                                                            | -2.1355317 down |
| HTR3A        | NM_213621    | 5-hydroxytryptamine (serotonin) receptor 3A                | -2.1413627 down |
| C6orf164     | NR_026784    | chromosome 6 open reading frame 164                        | -2.4579763 down |
| ACAN         | NM_001135    | aggrecan                                                   | -3.8159482 down |
| BCAS1        | NM_003657    | breast carcinoma amplified sequence 1                      | -2.7943482 down |
|              |              |                                                            | -6.458739 down  |
| LRRTM4       | NM_024993    | leucine rich repeat transmembrane neuronal 4               | -2.0386956 down |
|              | BC050023     |                                                            | -4.641401 down  |
| LOC100128402 | AK124574     | uncharacterized LOC100128402                               | -3.4809797 down |
| KRTAP5-5     | NM_001001480 | keratin associated protein 5-5                             | -2.3037202 down |
| MAP3K10      | NM_002446    | mitogen-activated protein kinase kinase kinase 10          | -3.0484006 down |
| MAGEB10      | NM_182506    | melanoma antigen family B, 10                              | -2.435996 down  |
|              | U80770       |                                                            | -2.6299403 down |
| DRGX         |              | dorsal root ganglia homeobox                               | -2.05292 down   |
| SHOX         | NM_006883    | short stature homeobox                                     | -4.3361726 down |
| LOC147004    | AK057317     | uncharacterized LOC147004                                  | -3.4306297 down |
| CXorf64      | NM_001122716 | chromosome X open reading frame 64                         | -2.1719856 down |
| KRT26        | NM_181539    | keratin 26                                                 | -2.0922265 down |
| MUCL1        | NM_058173    | mucin-like 1                                               | -3.1079416 down |
|              |              |                                                            | -2.6670797 down |
| PTN          | NM_002825    | pleiotrophin                                               | -2.4462154 down |
| PTPRH        | NM_002842    | protein tyrosine phosphatase, receptor type, H             | -2.4729233 down |
| C17orf82     | NM_203425    | chromosome 17 open reading frame 82                        | -3.0048323 down |
| CSH1         | NM_001317    | chorionic somatomammotropin hormone 1 (placental lactogen) | -3.4446065 down |
| OR6P1        | NM_001160325 | olfactory receptor, family 6, subfamily P, member 1        | -2.0816424 down |
| HAB1         | BU190374     | B1 for mucin                                               | -2.7543426 down |
| SERINC2      | NM_178865    | serine incorporator 2                                      | -2.1549928 down |
|              | AK293046     |                                                            | -2.1472292 down |
| PPP1R1C      | NM_001080545 | protein phosphatase 1, regulatory (inhibitor) subunit 1C   | -2.2610533 down |
| MAP3K13      | NM_004721    | mitogen-activated protein kinase kinase kinase 13          | -2.3992116 down |
| LOC100128126 | NR_038406    | uncharacterized LOC100128126                               | -2.489578 down  |
| SEZ6L        | NM_021115    | seizure related 6 homolog (mouse)-like                     | -3.1217635 down |

|              |              |                                                                            |                 |
|--------------|--------------|----------------------------------------------------------------------------|-----------------|
| SLC2A10      | NM_030777    | solute carrier family 2 (facilitated glucose transporter), member 10       | -2.0907114 down |
| DEFB1        | NM_005218    | defensin, beta 1                                                           | -2.3869355 down |
| PDILT        | NM_174924    | protein disulfide isomerase-like, testis expressed                         | -4.672183 down  |
|              | XM_003403800 |                                                                            | -2.4421797 down |
| PIKFYVE      | NM_001178000 | phosphoinositide kinase, FYVE finger containing                            | -2.231356 down  |
| LOC729020    | NM_001143909 | rcRPE                                                                      | -2.6608815 down |
| OAS3         | NM_006187    | 2'-5'-oligoadenylate synthetase 3, 100kDa                                  | -2.073909 down  |
| GTSE1        | NM_016426    | G-2 and S-phase expressed 1                                                | -2.2025383 down |
| OTC          | NM_000531    | ornithine carbamoyltransferase                                             | -3.4451053 down |
| CAPN13       | NM_144575    | calpain 13                                                                 | -3.1888301 down |
| LOC286299    | BX648501     | uncharacterized LOC286299                                                  | -2.9855356 down |
| TMEM132E     | NM_207313    | transmembrane protein 132E                                                 | -4.284696 down  |
| TRIM17       | NM_016102    | tripartite motif containing 17                                             | -3.620156 down  |
|              |              |                                                                            | -2.441919 down  |
| MBD3L1       | NM_145208    | methyl-CpG binding domain protein 3-like 1                                 | -3.1835573 down |
| TP53TG3      | NM_016212    | TP53 target 3                                                              | -2.0361729 down |
| PDE4DIP      | AK024906     | phosphodiesterase 4D interacting protein                                   | -2.464693 down  |
| AP1S2        | AK299921     | adaptor-related protein complex 1, sigma 2 subunit                         | -2.379591 down  |
|              |              |                                                                            | -2.3792312 down |
| FLJ42289     | NR_028139    | uncharacterized LOC388182                                                  | -2.0919814 down |
| ODF3B        | NM_001014440 | outer dense fiber of sperm tails 3B                                        | -3.0685577 down |
| LOC100128366 | XR_132755    | uncharacterized LOC100128366                                               | -2.9917042 down |
| OLFM2        | NM_058164    | olfactomedin 2                                                             | -2.5303257 down |
| LOC100133319 | AF132201     | PRO1804                                                                    | -2.7913573 down |
| CYP46A1      | AB209749     | cytochrome P450, family 46, subfamily A, polypeptide 1                     | -2.2400594 down |
|              |              |                                                                            | -2.6587827 down |
| CT45A5       | NM_001007551 | cancer/testis antigen family 45, member A5                                 | -8.094015 down  |
| C6orf118     | NM_144980    | chromosome 6 open reading frame 118                                        | -2.1295283 down |
|              |              |                                                                            | -3.1050115 down |
| NFASC        | NM_001005388 | neurofascin                                                                | -2.6506538 down |
| ARCN1        | NM_001655    | archain 1                                                                  | -3.026219 down  |
| EMR4P        | AY181245     | egf-like module containing, mucin-like, hormone receptor-like 4 pseudogene | -2.3522377 down |
| C17orf66     | NM_152781    | chromosome 17 open reading frame 66                                        | -2.6208339 down |
|              |              |                                                                            | -3.6261485 down |
| LINC00328    | AF172850     | long intergenic non-protein coding RNA 328                                 | -3.3823345 down |
| LOC100130480 | NM_001243517 | uncharacterized LOC100130480                                               | -5.265971 down  |
| OR4M1        | NM_001005500 | olfactory receptor, family 4, subfamily M, member 1                        | -2.6218333 down |
| EPX          | NM_000502    | eosinophil peroxidase                                                      | -2.1721497 down |
| LOC280665    | AF547222     | anti-CNG alpha 1 cation channel translation product-like                   | -2.2615285 down |
|              |              |                                                                            | -2.6959102 down |

|              |              |                                                                                        |                 |
|--------------|--------------|----------------------------------------------------------------------------------------|-----------------|
| PLK1         | NM_005030    | polo-like kinase 1                                                                     | -2.1234255 down |
| IGSF21       | NM_032880    | immunoglobulin superfamily, member 21                                                  | -2.7440553 down |
| LOC100507003 | NM_001195256 | uncharacterized protein LOC100507003                                                   | -4.1581097 down |
| LOC152286    | AL117431     | uncharacterized LOC152286                                                              | -2.150858 down  |
| SELV         | NM_182704    | selenoprotein V                                                                        | -4.503737 down  |
| LINC00256A   | NR_024366    | long intergenic non-protein coding RNA 256A                                            | -2.2850823 down |
|              |              |                                                                                        | -2.3124392 down |
| LRRC48       | NM_031294    | leucine rich repeat containing 48                                                      | -3.5324757 down |
| PEX7         | NM_000288    | peroxisomal biogenesis factor 7                                                        | -3.168864 down  |
| CADPS        | NM_183393    | Ca <sup>++</sup> -dependent secretion activator                                        | -2.1044981 down |
|              |              |                                                                                        | -2.3382058 down |
|              |              |                                                                                        | -4.4931135 down |
|              | AK000950     |                                                                                        | -4.49499 down   |
| OR51L1       | NM_001004755 | olfactory receptor, family 51, subfamily L, member 1                                   | -2.3236735 down |
|              |              |                                                                                        | -2.1920462 down |
| IAPP         | NM_000415    | islet amyloid polypeptide                                                              | -2.7572558 down |
| TPO          | NM_175721    | thyroid peroxidase                                                                     | -2.2086618 down |
| ILDR1        | NM_001199799 | immunoglobulin-like domain containing receptor 1                                       | -3.69501 down   |
| PPP1R12B     | NM_001167858 | protein phosphatase 1, regulatory subunit 12B                                          | -2.428456 down  |
| POM121L4P    | NR_024592    | POM121 membrane glycoprotein-like 4 pseudogene                                         | -6.7370973 down |
|              |              |                                                                                        | -3.391712 down  |
| ALPK3        | NM_020778    | alpha-kinase 3                                                                         | -3.1536317 down |
| HOXD12       | NM_021193    | homeobox D12                                                                           | -3.730177 down  |
| SLC22A24     | NM_001136506 | solute carrier family 22, member 24                                                    | -2.218759 down  |
| CLEC4M       | NM_001144911 | C-type lectin domain family 4, member M                                                | -3.3323767 down |
| PLXDC1       | NM_020405    | plexin domain containing 1                                                             | -2.8136203 down |
| MMP2         | NM_004530    | matrix metalloproteinase 2 (gelatinase A, 72kDa gelatinase, 72kDa type IV collagenase) | -3.0168788 down |
| LOC100130713 | AK096566     | uncharacterized LOC100130713                                                           | -2.4770176 down |
| RHO          | NM_000539    | rhodopsin                                                                              | -2.0070555 down |
| KRT15        | NM_002275    | keratin 15                                                                             | -2.0723236 down |
|              | AK056856     |                                                                                        | -2.1946433 down |
| LOC100128851 | AK127423     | uncharacterized LOC100128851                                                           | -3.5658264 down |
| LYPD4        | BC034629     | LY6/PLAUR domain containing 4                                                          | -2.368074 down  |
|              |              |                                                                                        | -3.4043262 down |
| SIM1         | NM_005068    | single-minded homolog 1 (Drosophila)                                                   | -3.516522 down  |
| ERBB4        | NM_005235    | v-erb-a erythroblastic leukemia viral oncogene homolog 4 (avian)                       | -3.0228953 down |
| TTC39A       | AB007921     | tetratricopeptide repeat domain 39A                                                    | -4.0860405 down |
| SSC5D        | NM_001144950 | scavenger receptor cysteine rich domain containing (5 domains)                         | -3.9298322 down |
| psiTPTE22    | AK226145     | TPTE pseudogene                                                                        | -2.7495475 down |
|              |              |                                                                                        | -2.1346862 down |

|              |              |                                                                |                 |
|--------------|--------------|----------------------------------------------------------------|-----------------|
|              | AK130024     |                                                                | -2.1361983 down |
| FAM20A       | NM_017565    | family with sequence similarity 20, member A                   | -2.5970764 down |
| C21orf62     | NM_019596    | chromosome 21 open reading frame 62                            | -2.2702794 down |
| YY2          | NM_206923    | YY2 transcription factor                                       | -2.745018 down  |
| SH2D4B       | NM_207372    | SH2 domain containing 4B                                       | -2.143373 down  |
|              |              |                                                                | -2.1196024 down |
| KLK3         | NM_001030050 | kallikrein-related peptidase 3                                 | -3.9587147 down |
|              | XR_133518    |                                                                | -2.1441925 down |
| FAM75C2      | NM_001166137 | family with sequence similarity 75, member C2                  | -2.105384 down  |
| HEYL         | NM_014571    | hairy/enhancer-of-split related with YRPW motif-like           | -2.776064 down  |
| WDR6         | NM_018031    | WD repeat domain 6                                             | -3.2026353 down |
| VTCN1        | NM_024626    | V-set domain containing T cell activation inhibitor 1          | -2.519322 down  |
|              | DA380926     |                                                                | -2.8633425 down |
| FZD10        | NM_007197    | frizzled family receptor 10                                    | -2.1467643 down |
| RSPO1        | NM_001038633 | R-spondin 1                                                    | -2.2965157 down |
| ATP7A        | NM_000052    | ATPase, Cu <sup>++</sup> transporting, alpha polypeptide       | -2.302463 down  |
| PBOV1        | NM_021635    | prostate and breast cancer overexpressed 1                     | -2.8565507 down |
| DLL4         | NM_019074    | delta-like 4 (Drosophila)                                      | -2.6120486 down |
| TBX15        | BX537778     | T-box 15                                                       | -2.572243 down  |
| LOC100130370 | XM_001714096 | uncharacterized LOC100130370                                   | -2.462087 down  |
| GGN          | NM_152657    | gametogenetin                                                  | -3.048785 down  |
|              |              |                                                                | -2.323868 down  |
| LOC391764    | XM_001713926 | putative TAF11-like protein ENSP00000332601-like               | -2.0393913 down |
| STXBP1       | NM_003165    | syntaxin binding protein 1                                     | -11.575024 down |
| PRSS35       | NM_153362    | protease, serine, 35                                           | -3.7475495 down |
| ARMC4        | NM_018076    | armadillo repeat containing 4                                  | -2.4722443 down |
| FAM182A      | NR_026713    | family with sequence similarity 182, member A                  | -3.3738337 down |
| GPHA2        | NM_130769    | glycoprotein hormone alpha 2                                   | -2.9351585 down |
| ERVH-3       | AB128832     | endogenous retrovirus group H, member 3                        | -2.152782 down  |
|              | XR_132502    |                                                                | -3.025131 down  |
|              | DA827940     |                                                                | -2.9747903 down |
| C11orf44     | XR_110537    | chromosome 11 open reading frame 44                            | -2.7863092 down |
|              | XR_132808    |                                                                | -2.5082736 down |
| C9orf53      | NR_024274    | chromosome 9 open reading frame 53                             | -2.208523 down  |
| LOC390705    | NR_033866    | protein phosphatase 2, regulatory subunit B'', beta pseudogene | -3.3711836 down |
| ALDH3A1      | NM_001135168 | aldehyde dehydrogenase 3 family, member A1                     | -2.2598565 down |
| FAM115A      | NM_014719    | family with sequence similarity 115, member A                  | -2.575283 down  |
| LOC100130027 | XR_110587    | uncharacterized LOC100130027                                   | -2.3434985 down |
| GPR143       | NM_000273    | G protein-coupled receptor 143                                 | -2.0001326 down |
|              |              |                                                                | -2.7141237 down |
| O3FAR1       | NM_181745    | omega-3 fatty acid receptor 1                                  | -3.5376074 down |

|              |              |                                                                    |                 |
|--------------|--------------|--------------------------------------------------------------------|-----------------|
| EIF4EBP1     | NM_004095    | eukaryotic translation initiation factor 4E binding protein 1      | -2.128559 down  |
| CCL20        | NM_004591    | chemokine (C-C motif) ligand 20                                    | -5.3729663 down |
| ARHGAP29     | NM_004815    | Rho GTPase activating protein 29                                   | -2.3029828 down |
| LCE3A        | NM_178431    | late cornified envelope 3A                                         | -4.215301 down  |
|              |              |                                                                    | -2.4659622 down |
| LINC00469    | NR_027146    | long intergenic non-protein coding RNA 469                         | -3.5327144 down |
| PDZD2        | AK128686     | PDZ domain containing 2                                            | -2.0075896 down |
| FPGS         | NM_004957    | folylpolyglutamate synthase                                        | -2.7402375 down |
| LOC100505873 | XR_132638    | putative apoptosis-related protein 2-like                          | -2.0176792 down |
| GHRH         | NM_021081    | growth hormone releasing hormone                                   | -2.4451466 down |
| PLOD3        | NM_001084    | procollagen-lysine, 2-oxoglutarate 5-dioxygenase 3                 | -2.2753787 down |
|              | XR_110159    |                                                                    | -2.81897 down   |
|              | XM_001723179 |                                                                    | -3.3416808 down |
|              |              |                                                                    | -3.2798095 down |
|              |              |                                                                    | -2.6721013 down |
| TMEM2        |              | transmembrane protein 2                                            | -3.3218708 down |
| FLJ42102     | NR_038862    | uncharacterized LOC399923                                          | -3.0024512 down |
| GSC          | NM_173849    | goosecoid homeobox                                                 | -2.2491138 down |
|              |              |                                                                    | -2.5129466 down |
|              | BE468260     |                                                                    | -2.3224392 down |
| GDF5         | NM_000557    | growth differentiation factor 5                                    | -2.5101643 down |
|              |              |                                                                    | -5.8776093 down |
| SARDH        | NM_007101    | sarcosine dehydrogenase                                            | -2.4933617 down |
| AHI1         |              | Abelson helper integration site 1                                  | -2.2153018 down |
| LOC100288018 | XM_002342495 | putative TAF11-like protein ENSP00000332601-like                   | -2.6748283 down |
| KIF21B       | NM_001252102 | kinesin family member 21B                                          | -2.2452161 down |
| TRPV1        | NM_080706    | transient receptor potential cation channel, subfamily V, member 1 | -4.1230664 down |
|              |              |                                                                    | -3.051634 down  |
| POLM         | AK092801     | polymerase (DNA directed), mu                                      | -6.1459208 down |
| PGF          | NM_002632    | placental growth factor                                            | -4.1989174 down |
| HOGA1        | AK094791     | 4-hydroxy-2-oxoglutarate aldolase 1                                | -2.9133787 down |
|              | BX350880     |                                                                    | -3.5348084 down |
|              |              |                                                                    | -2.3641286 down |
| FARP2        | NM_014808    | FERM, RhoGEF and pleckstrin domain protein 2                       | -3.1892345 down |
| OR4C13       | NM_001001955 | olfactory receptor, family 4, subfamily C, member 13               | -2.7805126 down |
| LOC652276    | NR_015441    | potassium channel tetramerisation domain containing 5 pseudogene   | -3.7802067 down |
| RPRM         | NM_019845    | reprimin, TP53 dependent G2 arrest mediator candidate              | -3.009193 down  |
| C17orf104    | NM_001145080 | chromosome 17 open reading frame 104                               | -2.2853482 down |
| C1orf110     | AK123573     | chromosome 1 open reading frame 110                                | -2.212149 down  |
| MIA          | NM_006533    | melanoma inhibitory activity                                       | -3.0630538 down |
| C11orf91     | NM_001166692 | chromosome 11 open reading frame 91                                | -3.2158985 down |

|              |              |                                                                     |                 |
|--------------|--------------|---------------------------------------------------------------------|-----------------|
| LINC00112    | NR_024028    | long intergenic non-protein coding RNA 112                          | -3.696973 down  |
| MAP3K9       | NM_033141    | mitogen-activated protein kinase kinase kinase 9                    | -2.248949 down  |
| KREMEN1      | NM_032045    | kringle containing transmembrane protein 1                          | -3.0111268 down |
| RAB3C        | NM_138453    | RAB3C, member RAS oncogene family                                   | -2.6397803 down |
| SLC26A1      | NM_022042    | solute carrier family 26 (sulfate transporter), member 1            | -2.140201 down  |
|              |              |                                                                     | -4.1089587 down |
| PRRG3        |              | proline rich Gla (G-carboxyglutamic acid) 3 (transmembrane)         | -4.0721474 down |
| LOC440518    | NR_033899    | golgin A2 pseudogene                                                | -2.8164687 down |
| RAET1E       | NM_139165    | retinoic acid early transcript 1E                                   | -2.6243067 down |
|              |              |                                                                     | -2.1660411 down |
|              |              |                                                                     | -3.950393 down  |
| LRCH3        | NM_032773    | leucine-rich repeats and calponin homology (CH) domain containing 3 | -2.3075314 down |
| CLIC5        | NM_016929    | chloride intracellular channel 5                                    | -2.813209 down  |
| PCDH8        | NM_002590    | protocadherin 8                                                     | -2.3611255 down |
|              | AK057379     |                                                                     | -5.463425 down  |
|              | AK098828     |                                                                     | -2.1194508 down |
| REP15        | NM_001029874 | RAB15 effector protein                                              | -3.6371796 down |
|              | BC069683     |                                                                     | -3.0403626 down |
| LOC339685    | NR_038922    | uncharacterized LOC339685                                           | -2.120838 down  |
| PATE1        | NM_138294    | prostate and testis expressed 1                                     | -2.601538 down  |
| SLC19A3      |              | solute carrier family 19, member 3                                  | -2.89024 down   |
| MYCT1        | NM_025107    | myc target 1                                                        | -3.1453035 down |
| LOC200261    | NR_034149    | uncharacterized LOC200261                                           | -2.534903 down  |
| AK4          | NM_001005353 | adenylate kinase 4                                                  | -4.0319743 down |
|              |              |                                                                     | -2.2034023 down |
| FAM116B      | NM_001001794 | family with sequence similarity 116, member B                       | -2.6293757 down |
| RTN4RL1      | NM_178568    | reticulon 4 receptor-like 1                                         | -2.4262722 down |
| SEPN1        | NM_020451    | selenoprotein N, 1                                                  | -2.6878133 down |
| RBMY1B       | NM_001006121 | RNA binding motif protein, Y-linked, family 1, member B             | -2.2463882 down |
|              |              |                                                                     | -5.8662295 down |
|              |              |                                                                     | -2.0807428 down |
|              |              |                                                                     | -3.1178367 down |
|              | XM_003403554 |                                                                     | -3.155046 down  |
| LOC100130442 | AK131364     | uncharacterized LOC100130442                                        | -4.7179313 down |
| L2HGDH       | NM_024884    | L-2-hydroxyglutarate dehydrogenase                                  | -3.6938467 down |
|              |              |                                                                     | -3.3330872 down |
| MUC12        | NM_001164462 | mucin 12, cell surface associated                                   | -2.31573 down   |
| LUZP4        | NM_016383    | leucine zipper protein 4                                            | -2.3685749 down |
|              | DA825750     |                                                                     | -2.1884382 down |
| LY6D         | NM_003695    | lymphocyte antigen 6 complex, locus D                               | -2.1063852 down |
| ABHD12B      | NM_001206673 | abhydrolase domain containing 12B                                   | -2.2948968 down |

|              |              |                                                                                      |                 |
|--------------|--------------|--------------------------------------------------------------------------------------|-----------------|
| C7           | NM_000587    | complement component 7                                                               | -4.3760676 down |
|              |              |                                                                                      | -2.1417725 down |
|              |              |                                                                                      | -2.1340694 down |
| MAGEB16      | NM_001099921 | melanoma antigen family B, 16                                                        | -3.1281996 down |
| LOC339788    | NR_015405    | uncharacterized LOC339788                                                            | -3.0976439 down |
| TERF1        | AK128828     | telomeric repeat binding factor (NIMA-interacting) 1                                 | -2.939499 down  |
| LOC100131650 | AK124894     | uncharacterized LOC100131650                                                         | -2.3067143 down |
| FLJ32955     | XR_108437    | uncharacterized protein FLJ32955                                                     | -2.436399 down  |
|              |              |                                                                                      | -2.263893 down  |
| HIGD1B       | NM_016438    | HIG1 hypoxia inducible domain family, member 1B                                      | -4.7088146 down |
|              | AK127494     |                                                                                      | -2.2153118 down |
| C8orf66      | AL834492     | chromosome 8 open reading frame 66                                                   | -5.335049 down  |
| GGNBP1       | NR_028361    | gametogenetin binding protein 1                                                      | -2.296233 down  |
|              | XR_108962    |                                                                                      | -2.131698 down  |
| GJA4         | NM_002060    | gap junction protein, alpha 4, 37kDa                                                 | -2.754091 down  |
| FLJ45482     | AK127393     | uncharacterized LOC645566                                                            | -5.4473696 down |
| ZNF221       | NM_013359    | zinc finger protein 221                                                              | -2.2103717 down |
|              | BM264234     |                                                                                      | -2.0487006 down |
| RIBC1        | NM_144968    | RIB43A domain with coiled-coils 1                                                    | -2.9950383 down |
| WNK2         | NM_006648    | WNK lysine deficient protein kinase 2                                                | -2.8913014 down |
| CNTN6        | NM_014461    | contactin 6                                                                          | -2.5210204 down |
|              |              |                                                                                      | -2.5062912 down |
| CALML6       | NM_138705    | calmodulin-like 6                                                                    | -2.3114624 down |
| APOC4        | NM_001646    | apolipoprotein C-IV                                                                  | -2.2767167 down |
| OR13H1       | NM_001004486 | olfactory receptor, family 13, subfamily H, member 1                                 | -2.2315154 down |
| LOC401480    | AK056998     | uncharacterized LOC401480                                                            | -2.558823 down  |
| ATF7IP       | NM_018179    | activating transcription factor 7 interacting protein                                | -2.179154 down  |
| LRRC3B       | NM_052953    | leucine rich repeat containing 3B                                                    | -2.304273 down  |
| IGSF11       | NM_152538    | immunoglobulin superfamily, member 11                                                | -2.044415 down  |
| LOC442122    | AK128759     | uncharacterized LOC442122                                                            | -3.912592 down  |
| ZFHX2        | NM_033400    | zinc finger homeobox 2                                                               | -2.0057359 down |
| SNX29        | BC029857     | sorting nexin 29                                                                     | -2.550967 down  |
| TAF7L        | NM_024885    | TAF7-like RNA polymerase II, TATA box binding protein (TBP)-associated factor, 50kDa | -4.237088 down  |
| B9D1         | NM_015681    | B9 protein domain 1                                                                  | -2.1498072 down |
|              | XR_109115    |                                                                                      | -2.995904 down  |
|              |              |                                                                                      | -5.541071 down  |
| C11orf94     | NM_001080446 | chromosome 11 open reading frame 94                                                  | -2.2475994 down |
| LOC100128644 | XR_110032    | LMNE6487                                                                             | -2.3389635 down |
| LOC340094    | NR_026994    | uncharacterized LOC340094                                                            | -2.321115 down  |
| LPA          | NM_005577    | lipoprotein, Lp(a)                                                                   | -2.062975 down  |

|              |              |                                                                    |                 |
|--------------|--------------|--------------------------------------------------------------------|-----------------|
| SLC22A7      | NM_153320    | solute carrier family 22 (organic anion transporter), member 7     | -2.5640233 down |
| DCN          | NM_001920    | decorin                                                            | -2.601472 down  |
|              |              |                                                                    | -2.8931408 down |
| ADAMTSL5     | NM_213604    | ADAMTS-like 5                                                      | -3.1528556 down |
| LOC400682    | XM_003118492 | zinc finger protein 100-like                                       | -3.1319497 down |
| LOC645586    | AK057937     | uncharacterized LOC645586                                          | -3.1844053 down |
| LAMA3        | BC093406     | laminin, alpha 3                                                   | -2.5552838 down |
| FAM83H       | NM_198488    | family with sequence similarity 83, member H                       | -2.2783282 down |
| RLIM         | NM_183353    | ring finger protein, LIM domain interacting                        | -2.0225472 down |
| TBXA2R       | NM_001060    | thromboxane A2 receptor                                            | -2.2187736 down |
| ZNRF3        | NM_001206998 | zinc and ring finger 3                                             | -4.799175 down  |
| SH3TC1       | BC068094     | SH3 domain and tetratricopeptide repeats 1                         | -2.5559738 down |
| OR7E12P      | NR_044999    | olfactory receptor, family 7, subfamily E, member 12 pseudogene    | -2.3326104 down |
| CCL15        | NM_032965    | chemokine (C-C motif) ligand 15                                    | -2.2070825 down |
| LOC440082    | AK131474     | uncharacterized LOC440082                                          | -2.0122592 down |
| MGC11082     | BC094703     | uncharacterized LOC84777                                           | -2.0489757 down |
|              | AK127982     |                                                                    | -2.0305517 down |
| TRPM4        | NM_017636    | transient receptor potential cation channel, subfamily M, member 4 | -2.555945 down  |
| MYOZ3        | NM_133371    | myozenin 3                                                         | -3.1188323 down |
| TAS2R8       | NM_023918    | taste receptor, type 2, member 8                                   | -2.297789 down  |
|              |              |                                                                    | -2.9971247 down |
|              |              |                                                                    | -2.0324469 down |
| EPM2A        | NM_001018041 | epilepsy, progressive myoclonus type 2A, Lafora disease (laforin)  | -2.4355779 down |
| ZNF365       | NM_199451    | zinc finger protein 365                                            | -3.8610733 down |
|              |              |                                                                    | -2.2933345 down |
| PSG10P       | L14723       | pregnancy specific beta-1-glycoprotein 10, pseudogene              | -5.8618336 down |
| PCDH10       | NM_032961    | protocadherin 10                                                   | -2.4410305 down |
| OTOG         | XM_001717531 | otogelin                                                           | -2.0625606 down |
| BCOR         |              | BCL6 corepressor                                                   | -2.0180728 down |
| LOC100130433 | AK096255     | uncharacterized LOC100130433                                       | -2.5512693 down |
|              |              |                                                                    | -7.8933845 down |
| C9orf169     | NM_199001    | chromosome 9 open reading frame 169                                | -2.0445554 down |
| MEX3D        | NM_001174118 | mex-3 homolog D (C. elegans)                                       | -2.4165623 down |
| DUOXA2       | BX537581     | dual oxidase maturation factor 2                                   | -2.217342 down  |
| PGP          | NM_001042371 | phosphoglycolate phosphatase                                       | -2.0516772 down |
|              |              |                                                                    | -3.0303755 down |
| PKD2L1       | NM_016112    | polycystic kidney disease 2-like 1                                 | -2.9406118 down |
| OR2A5        | NM_012365    | olfactory receptor, family 2, subfamily A, member 5                | -3.9019973 down |
| IVL          | NM_005547    | involucrin                                                         | -3.6366699 down |
| C18orf15     | AK055900     | chromosome 18 open reading frame 15                                | -4.244676 down  |
| PCDHA9       | NM_014005    | protocadherin alpha 9                                              | -2.320552 down  |



|              |              |                                                                                                                        |                 |
|--------------|--------------|------------------------------------------------------------------------------------------------------------------------|-----------------|
| ATP2A1       | NM_173201    | ATPase, Ca <sup>++</sup> transporting, cardiac muscle, fast twitch 1                                                   | -2.6509368 down |
| C10orf67     | NM_153714    | chromosome 10 open reading frame 67                                                                                    | -2.49525 down   |
| NEUROD2      | NM_006160    | neurogenic differentiation 2                                                                                           | -2.582318 down  |
|              | DA292495     |                                                                                                                        | -4.4575987 down |
| KLF17        | NM_173484    | Kruppel-like factor 17                                                                                                 | -2.9071062 down |
|              |              |                                                                                                                        | -2.0764837 down |
| LINC00471    | NR_024079    | long intergenic non-protein coding RNA 471                                                                             | -2.558882 down  |
| LOC400950    |              | uncharacterized LOC400950                                                                                              | -2.6039388 down |
| SRRM2        | NM_016333    | serine/arginine repetitive matrix 2                                                                                    | -2.4846544 down |
| ITPKA        | NM_002220    | inositol-trisphosphate 3-kinase A                                                                                      | -2.3765798 down |
| ZNF710       | NM_198526    | zinc finger protein 710                                                                                                | -3.2708488 down |
| HIC2         | NM_015094    | hypermethylated in cancer 2                                                                                            | -3.6411602 down |
|              |              |                                                                                                                        | -2.0564435 down |
| ARHGEF25     | NM_182947    | Rho guanine nucleotide exchange factor (GEF) 25                                                                        | -2.2068572 down |
| LOC100128640 | NR_028389    | uncharacterized LOC100128640                                                                                           | -2.6750498 down |
| CENPM        | NM_001002876 | centromere protein M                                                                                                   | -3.0034392 down |
|              | AK126822     |                                                                                                                        | -2.144103 down  |
|              | XR_109126    |                                                                                                                        | -2.3793402 down |
| SNAR-A3      | NR_024214    | small ILF3/NF90-associated RNA A3                                                                                      | -2.610968 down  |
| ARTN         | NM_057090    | artemin                                                                                                                | -2.9977477 down |
| IKZF3        | NM_012481    | IKAROS family zinc finger 3 (Aiolos)                                                                                   | -2.4724152 down |
| C1orf187     | NM_198545    | chromosome 1 open reading frame 187                                                                                    | -4.297741 down  |
| GOLGA8IP     | NR_024074    | golgin A8 family, member I, pseudogene                                                                                 | -2.3570118 down |
| KERA         | NM_007035    | keratocan                                                                                                              | -2.166617 down  |
| CCDC18       | NM_206886    | coiled-coil domain containing 18                                                                                       | -2.0145316 down |
|              |              |                                                                                                                        | -5.5404215 down |
| TREM2        | NM_018965    | triggering receptor expressed on myeloid cells 2                                                                       | -2.5101337 down |
| OR51V1       | NM_001004760 | olfactory receptor, family 51, subfamily V, member 1                                                                   | -3.1856377 down |
| AGXT         | NM_000030    | alanine-glyoxylate aminotransferase                                                                                    | -2.421701 down  |
| LOC440297    | NR_033579    | chondroitin sulfate proteoglycan 4 pseudogene                                                                          | -2.7088027 down |
| SRGAP1       | NM_020762    | SLIT-ROBO Rho GTPase activating protein 1                                                                              | -5.9805984 down |
| LOC100128184 | AK128032     | uncharacterized LOC100128184                                                                                           | -3.726653 down  |
| C9orf79      | NM_178828    | chromosome 9 open reading frame 79                                                                                     | -3.0858095 down |
| PAQR9        | NM_198504    | progesterone and adipoQ receptor family member IX                                                                      | -2.3362849 down |
|              | BC137370     |                                                                                                                        | -3.0560966 down |
|              |              |                                                                                                                        | -3.1110375 down |
| C12orf42     | BC039352     | chromosome 12 open reading frame 42                                                                                    | -2.0324252 down |
| OR2Z1        | NM_001004699 | olfactory receptor, family 2, subfamily Z, member 1                                                                    | -4.651697 down  |
| KRTAP5-7     | NM_001012503 | keratin associated protein 5-7                                                                                         | -3.689695 down  |
| AKR1C1       |              | aldo-keto reductase family 1, member C1 (dihydrodiol dehydrogenase 1; 20-alpha (3-alpha)-hydroxysteroid dehydrogenase) | -2.9251955 down |

|          |              |                                                                                                                                |                 |
|----------|--------------|--------------------------------------------------------------------------------------------------------------------------------|-----------------|
| KIAA1804 | NM_032435    | mixed lineage kinase 4                                                                                                         | -3.1814885 down |
|          |              |                                                                                                                                | -2.0366514 down |
|          |              |                                                                                                                                | -3.0949423 down |
| PRSS37   | NM_001008270 | protease, serine, 37                                                                                                           | -2.7350087 down |
|          | AB529249     |                                                                                                                                | -2.4436464 down |
| TCF25    | NM_014972    | transcription factor 25 (basic helix-loop-helix)                                                                               | -2.0621836 down |
| IL19     | NM_153758    | interleukin 19                                                                                                                 | -2.0626311 down |
| MS4A4E   | XM_003119183 | membrane-spanning 4-domains, subfamily A, member 4E                                                                            | -2.944113 down  |
| HNF1A    | X71347       | HNF1 homeobox A                                                                                                                | -9.948551 down  |
| PRDM5    | NM_018699    | PR domain containing 5                                                                                                         | -2.291478 down  |
| SPATC1   | NM_198572    | spermatogenesis and centriole associated 1                                                                                     | -3.3295693 down |
| FGL1     | NM_201553    | fibrinogen-like 1                                                                                                              | -3.7432191 down |
| ACBD7    | NM_001039844 | acyl-CoA binding domain containing 7                                                                                           | -3.5007224 down |
| OR7E91P  | NR_002185    | olfactory receptor, family 7, subfamily E, member 91 pseudogene                                                                | -2.177752 down  |
|          |              |                                                                                                                                | -3.9875796 down |
|          | CR599065     |                                                                                                                                | -3.7671514 down |
| ANKDD1A  | NM_182703    | ankyrin repeat and death domain containing 1A                                                                                  | -2.6914237 down |
|          | DW451783     |                                                                                                                                | -3.93076 down   |
|          |              |                                                                                                                                | -2.163832 down  |
|          |              |                                                                                                                                | -2.5405533 down |
| SLC12A1  | NM_000338    | solute carrier family 12 (sodium/potassium/chloride transporters), member 1                                                    | -2.1636744 down |
| ARHGAP32 | NM_014715    | Rho GTPase activating protein 32                                                                                               | -2.3476632 down |
| CHRFAM7A | NM_139320    | CHRNA7 (cholinergic receptor, nicotinic, alpha 7, exons 5-10) and FAM7A (family with sequence similarity 7A, exons A-E) fusion | -2.266517 down  |
|          |              |                                                                                                                                | -4.634769 down  |
|          |              |                                                                                                                                | -5.431114 down  |
|          |              |                                                                                                                                | -4.826088 down  |
| SYTL4    | AL832596     | synaptotagmin-like 4                                                                                                           | -3.0938442 down |
| TRIM66   | NM_014818    | tripartite motif containing 66                                                                                                 | -2.0310817 down |
| FAM153A  | NM_173663    | family with sequence similarity 153, member A                                                                                  | -2.7518253 down |
| MYL7     | NM_021223    | myosin, light chain 7, regulatory                                                                                              | -3.0365138 down |
| TSSK6    | NM_032037    | testis-specific serine kinase 6                                                                                                | -3.1816342 down |
| KRT78    | NM_173352    | keratin 78                                                                                                                     | -3.6873376 down |
| MGC45800 | NR_027107    | uncharacterized LOC90768                                                                                                       | -2.265468 down  |
| PRKACG   | NM_002732    | protein kinase, cAMP-dependent, catalytic, gamma                                                                               | -2.1536882 down |
| GPX3     | NM_002084    | glutathione peroxidase 3 (plasma)                                                                                              | -26.24971 down  |
|          | AB529247     |                                                                                                                                | -2.674829 down  |
| MAGI1    | NM_004742    | membrane associated guanylate kinase, WW and PDZ domain containing 1                                                           | -2.219465 down  |
|          |              |                                                                                                                                | -2.26418 down   |
| C5orf56  | AK096941     | chromosome 5 open reading frame 56                                                                                             | -2.3479493 down |
|          | XM_003119194 |                                                                                                                                | -2.187194 down  |

|              |              |                                                          |                 |
|--------------|--------------|----------------------------------------------------------|-----------------|
| PGF          | AK023843     | placental growth factor                                  | -3.2633703 down |
| GNG4         | NM_001098722 | guanine nucleotide binding protein (G protein), gamma 4  | -2.2099357 down |
| WT1-AS       | NR_023920    | WT1 antisense RNA (non-protein coding)                   | -2.638942 down  |
|              | AK095662     |                                                          | -3.7249205 down |
| THRSP        | NM_003251    | thyroid hormone responsive                               | -2.5471523 down |
| NPY5R        | NM_006174    | neuropeptide Y receptor Y5                               | -2.4194074 down |
| C6orf191     | NM_001010876 | chromosome 6 open reading frame 191                      | -2.596214 down  |
| LOC100287879 | NR_033978    | uncharacterized LOC100287879                             | -2.8703406 down |
| LOC100130876 | XR_109361    | uncharacterized LOC100130876                             | -2.5611365 down |
| KCNG1        | BC006367     | potassium voltage-gated channel, subfamily G, member 1   | -2.251751 down  |
| ADRA2B       | NM_000682    | adrenergic, alpha-2B-, receptor                          | -2.0081847 down |
| CDH23        | NM_022124    | cadherin-related 23                                      | -2.3900423 down |
| CACNG7       | NM_031896    | calcium channel, voltage-dependent, gamma subunit 7      | -3.4514198 down |
| ANKRD36B     | NM_025190    | ankyrin repeat domain 36B                                | -2.42802 down   |
|              | AK097428     |                                                          | -2.2840698 down |
|              |              |                                                          | -8.08274 down   |
| DDC          | NM_001242890 | dopa decarboxylase (aromatic L-amino acid decarboxylase) | -2.8398564 down |
| C1orf98      | NR_040064    | chromosome 1 open reading frame 98                       | -3.9664595 down |
|              |              |                                                          | -4.1982193 down |
| LOC100132495 | AK127414     | uncharacterized LOC100132495                             | -2.2449865 down |
|              |              |                                                          | -5.6128917 down |
| C12orf34     | NM_032829    | chromosome 12 open reading frame 34                      | -2.464742 down  |
| MGC24103     | XR_108934    | uncharacterized MGC24103                                 | -3.5006068 down |
| GIGYF2       |              | GRB10 interacting GYF protein 2                          | -2.1976812 down |
| LOC415056    | NR_024369    | uncharacterized LOC415056                                | -2.0007253 down |
|              |              |                                                          | -2.2938197 down |
|              |              |                                                          | -2.466728 down  |
|              |              |                                                          | -3.697126 down  |
| CRHR1        | NM_001145146 | corticotropin releasing hormone receptor 1               | -3.3979523 down |
| ADCK3        | AK123980     | aarF domain containing kinase 3                          | -2.3748455 down |
| CRX          | NM_000554    | cone-rod homeobox                                        | -3.6322737 down |
| C2orf65      | NM_138804    | chromosome 2 open reading frame 65                       | -5.0430565 down |
| LOC147670    | NM_001193628 | uncharacterized LOC147670                                | -3.9596071 down |
| GRM4         | NM_000841    | glutamate receptor, metabotropic 4                       | -3.4541683 down |
| CNBD1        | NM_173538    | cyclic nucleotide binding domain containing 1            | -2.9723847 down |
| MFSD2B       | NM_001080473 | major facilitator superfamily domain containing 2B       | -2.5988963 down |
|              |              |                                                          | -3.6310484 down |
| FAM95B1      | NR_026759    | family with sequence similarity 95, member B1            | -6.888975 down  |
| FOXL1        | NM_005250    | forkhead box L1                                          | -2.4489553 down |
| PKD1L2       | NM_052892    | polycystic kidney disease 1-like 2                       | -3.6406822 down |
| ASS1         | NM_000050    | argininosuccinate synthase 1                             | -4.2798576 down |

|              |              |                                                                                                   |                 |
|--------------|--------------|---------------------------------------------------------------------------------------------------|-----------------|
| MSTO2P       | NR_024117    | misato homolog 2 pseudogene                                                                       | -3.1386647 down |
|              |              |                                                                                                   | -8.059803 down  |
| DOT1L        | NM_032482    | DOT1-like, histone H3 methyltransferase ( <i>S. cerevisiae</i> )                                  | -2.0727584 down |
| PLAC9        |              | placenta-specific 9                                                                               | -2.4713573 down |
| SMARCA1      | NM_003069    | SWI/SNF related, matrix associated, actin dependent regulator of chromatin, subfamily a, member 1 | -2.0854108 down |
|              |              |                                                                                                   | -2.085765 down  |
| LINC00085    | NR_024330    | long intergenic non-protein coding RNA 85                                                         | -2.171319 down  |
| DCAKD        | NM_024819    | dephospho-CoA kinase domain containing                                                            | -3.5462472 down |
| GABRB3       | BC038837     | gamma-aminobutyric acid (GABA) A receptor, beta 3                                                 | -2.5747182 down |
| LOC340335    | AK074459     | uncharacterized LOC340335                                                                         | -2.6379824 down |
|              |              |                                                                                                   | -2.2797046 down |
| BRD7         |              | bromodomain containing 7                                                                          | -8.3824215 down |
|              | CB962925     |                                                                                                   | -5.0996275 down |
| CETN1        | NM_004066    | centrin, EF-hand protein, 1                                                                       | -2.6012702 down |
| RBPJL        | NM_014276    | recombination signal binding protein for immunoglobulin kappa J region-like                       | -2.5140555 down |
|              | AY358259     |                                                                                                   | -2.1031651 down |
| C12orf33     | AK123808     | chromosome 12 open reading frame 33                                                               | -2.3952613 down |
| CREG2        | NM_153836    | cellular repressor of E1A-stimulated genes 2                                                      | -3.1792367 down |
| CRABP2       | NM_001878    | cellular retinoic acid binding protein 2                                                          | -2.2594383 down |
| CPS1-IT1     | NR_002763    | CPS1 intronic transcript 1 (non-protein coding)                                                   | -2.132304 down  |
| NRXN2        | NM_138732    | neurexin 2                                                                                        | -2.7401717 down |
|              |              |                                                                                                   | -3.6120808 down |
|              |              |                                                                                                   | -4.3502536 down |
| CROCCP2      | AK123337     | ciliary rootlet coiled-coil, rootletin pseudogene 2                                               | -2.0799756 down |
| LOC648691    | NR_027426    | uncharacterized LOC648691                                                                         | -2.7376802 down |
| ZNF365       | NM_199451    | zinc finger protein 365                                                                           | -2.3908486 down |
| LOC100129213 | NR_038419    | uncharacterized LOC100129213                                                                      | -4.172857 down  |
|              |              |                                                                                                   | -2.5002108 down |
| GCNT7        | NM_080615    | glucosaminyl (N-acetyl) transferase family member 7                                               | -2.0400364 down |
|              | CR997556     |                                                                                                   | -2.563053 down  |
|              |              |                                                                                                   | -3.6988819 down |
| LRRC37A3     | NM_199340    | leucine rich repeat containing 37, member A3                                                      | -3.8995996 down |
| C11orf20     | NM_001039496 | chromosome 11 open reading frame 20                                                               | -2.8640788 down |
|              |              |                                                                                                   | -2.521992 down  |
| GPR27        | NM_018971    | G protein-coupled receptor 27                                                                     | -2.7395535 down |
| CCNB3        | NM_033031    | cyclin B3                                                                                         | -2.4409332 down |
| MOK          | NM_014226    | MOK protein kinase                                                                                | -3.1339493 down |
|              |              |                                                                                                   | -6.421004 down  |
| C15orf2      | NM_018958    | chromosome 15 open reading frame 2                                                                | -5.384669 down  |
| LOC284395    | NR_040029    | uncharacterized LOC284395                                                                         | -3.5200908 down |

|              |              |                                                                     |                 |
|--------------|--------------|---------------------------------------------------------------------|-----------------|
| MOBP         | NM_182935    | myelin-associated oligodendrocyte basic protein                     | -2.4987159 down |
| RNF151       | NM_174903    | ring finger protein 151                                             | -6.9431434 down |
|              |              |                                                                     | -5.995757 down  |
| FLJ46300     | NR_038365    | FLJ46300 protein                                                    | -2.3785203 down |
| XIRP1        | NM_194293    | xin actin-binding repeat containing 1                               | -2.0768394 down |
| HTR1A        | NM_000524    | 5-hydroxytryptamine (serotonin) receptor 1A                         | -2.294744 down  |
| TRIM15       | NM_033229    | tripartite motif containing 15                                      | -2.6229405 down |
|              |              |                                                                     | -3.247132 down  |
| PRDM8        | NM_020226    | PR domain containing 8                                              | -2.211857 down  |
|              | DB452078     |                                                                     | -5.68079 down   |
| ATMIN        | AK302556     | ATM interactor                                                      | -3.0260386 down |
| CHRDL1       | NM_145234    | chordin-like 1                                                      | -4.456384 down  |
| CIB4         | NM_001029881 | calcium and integrin binding family member 4                        | -2.0584834 down |
| NRG1         | AF176921     | neuregulin 1                                                        | -2.4161296 down |
|              |              |                                                                     | -2.4606175 down |
| CAND1        | NM_018448    | cullin-associated and neddylation-dissociated 1                     | -2.76554 down   |
| LOC728208    | XR_108453    | uncharacterized LOC728208                                           | -2.0081418 down |
| NWD1         | NM_001007525 | NACHT and WD repeat domain containing 1                             | -2.9914217 down |
| ITLN2        | NM_080878    | intelectin 2                                                        | -2.399439 down  |
| LOC100128386 | AK124326     | uncharacterized LOC100128386                                        | -3.6855512 down |
| BMP8B        | NM_001720    | bone morphogenetic protein 8b                                       | -3.4113386 down |
|              |              |                                                                     | -2.8334656 down |
|              |              |                                                                     | -2.3038237 down |
| C6orf132     | NM_001164446 | chromosome 6 open reading frame 132                                 | -2.0614069 down |
| IGF2-AS      | NR_028044    | insulin-like growth factor 2 antisense (non-protein coding)         | -2.2078357 down |
|              |              |                                                                     | -2.2797542 down |
| KRTAP5-8     | NM_021046    | keratin associated protein 5-8                                      | -2.9945402 down |
| LRRC37BP1    | AK125981     | leucine rich repeat containing 37B pseudogene 1                     | -2.0038986 down |
| DLGAP1       | BC040718     | discs, large (Drosophila) homolog-associated protein 1              | -2.4041307 down |
|              |              |                                                                     | -2.3075495 down |
| IGLON5       | NM_001101372 | IgLON family member 5                                               | -4.5871277 down |
| CXorf36      | NM_176819    | chromosome X open reading frame 36                                  | -3.6356258 down |
|              |              |                                                                     | -3.9116843 down |
| OR1D5        | NM_014566    | olfactory receptor, family 1, subfamily D, member 5                 | -2.5481603 down |
|              | BG192758     |                                                                     | -4.4178777 down |
| SPG7         | AF090912     | spastic paraplegia 7 (pure and complicated autosomal recessive)     | -2.546172 down  |
| LOC401164    | AK095968     | uncharacterized LOC401164                                           | -2.3773453 down |
| NAV1         | NM_020443    | neuron navigator 1                                                  | -2.265468 down  |
| ECM2         | NM_001197296 | extracellular matrix protein 2, female organ and adipocyte specific | -2.1066232 down |
| TMED7-TICAM2 | NM_001164469 | TMED7-TICAM2 readthrough                                            | -4.454804 down  |
| CCL13        | NM_005408    | chemokine (C-C motif) ligand 13                                     | -2.7365208 down |

|              |              |                                                                                   |                 |
|--------------|--------------|-----------------------------------------------------------------------------------|-----------------|
| CNTN1        | NM_001843    | contactin 1                                                                       | -2.6254642 down |
| TMEM136      | NM_174926    | transmembrane protein 136                                                         | -3.2309813 down |
| SPRY1        |              | sprouty homolog 1, antagonist of FGF signaling (Drosophila)                       | -3.9324708 down |
| HES2         | NM_019089    | hairy and enhancer of split 2 (Drosophila)                                        | -2.1838522 down |
| OR5M1        | NM_001004740 | olfactory receptor, family 5, subfamily M, member 1                               | -2.0258088 down |
| LOC643669    | NM_001243212 | uncharacterized LOC643669                                                         | -2.9784377 down |
| EFNB3        | NM_001406    | ephrin-B3                                                                         | -2.0737786 down |
|              |              |                                                                                   | -2.2057874 down |
| NTM          | NM_001144058 | neurotrimin                                                                       | -3.3258417 down |
| FAM115C      | AK090395     | family with sequence similarity 115, member C                                     | -2.8501523 down |
| ZNF735       | NM_001159524 | zinc finger protein 735                                                           | -2.6174467 down |
|              |              |                                                                                   | -3.1889184 down |
| CD276        | NM_001024736 | CD276 molecule                                                                    | -3.9181426 down |
| KIR3DL3      | NM_153443    | killer cell immunoglobulin-like receptor, three domains, long cytoplasmic tail, 3 | -5.4592304 down |
| CROT         | NM_021151    | carnitine O-octanoyltransferase                                                   | -2.5305808 down |
| GPR172B      | NM_017986    | G protein-coupled receptor 172B                                                   | -3.277146 down  |
| KCNK10       | NM_021161    | potassium channel, subfamily K, member 10                                         | -3.266088 down  |
|              | XM_003118656 |                                                                                   | -6.7563615 down |
| DNAH100S     | AK127211     | dynein, axonemal, heavy chain 10 opposite strand                                  | -2.3963795 down |
|              |              |                                                                                   | -2.272889 down  |
| LOC100128675 | NR_024561    | uncharacterized LOC100128675                                                      | -3.4931052 down |
| FAM180B      | NM_001164379 | family with sequence similarity 180, member B                                     | -3.0560126 down |
| SNTG1        |              | syntrophin, gamma 1                                                               | -4.626544 down  |
| LOC400043    | NR_026656    | uncharacterized LOC400043                                                         | -2.0180123 down |
| LOC100653108 | XR_133081    | uncharacterized LOC100653108                                                      | -3.705672 down  |
| ARHGAP42     | NM_152432    | Rho GTPase activating protein 42                                                  | -5.0928216 down |
|              | BC044628     |                                                                                   | -2.6442804 down |
| GRID2        | NM_001510    | glutamate receptor, ionotropic, delta 2                                           | -2.403945 down  |
| TAF1B        |              | TATA box binding protein (TBP)-associated factor, RNA polymerase I, B, 63kDa      | -2.3717206 down |
| SF3B2        | CN273640     | splicing factor 3b, subunit 2, 145kDa                                             | -3.7307885 down |
| HIST2H3A     | NM_001005464 | histone cluster 2, H3a                                                            | -4.079533 down  |
|              | AK127863     |                                                                                   | -4.8730435 down |
| NKAIN4       | NM_152864    | Na <sup>+</sup> /K <sup>+</sup> transporting ATPase interacting 4                 | -2.1338558 down |
| LOC642776    | BC003645     | uncharacterized LOC642776                                                         | -3.8382444 down |
|              | AA489744     |                                                                                   | -3.2260072 down |
| PAK6         | NM_020168    | p21 protein (Cdc42/Rac)-activated kinase 6                                        | -2.4176488 down |
| VAPB         | NM_004738    | VAMP (vesicle-associated membrane protein)-associated protein B and C             | -2.6637015 down |
| C10orf112    | XM_003403619 | chromosome 10 open reading frame 112                                              | -5.223857 down  |
| LOC284191    | AK097198     | uncharacterized LOC284191                                                         | -3.6086152 down |
| PDLIM2       | NM_176871    | PDZ and LIM domain 2 (mystique)                                                   | -2.5667872 down |

|              |              |                                                                |                 |
|--------------|--------------|----------------------------------------------------------------|-----------------|
| TACC2        | NM_206862    | transforming, acidic coiled-coil containing protein 2          | -2.6267865 down |
| PIGQ         | NM_148920    | phosphatidylinositol glycan anchor biosynthesis, class Q       | -2.2098374 down |
| SCXA         | NM_001008271 | scleraxis homolog A (mouse)                                    | -2.4852164 down |
| DLK2         | NM_206539    | delta-like 2 homolog (Drosophila)                              | -2.4141169 down |
| RGMB         | NM_001012761 | RGM domain family, member B                                    | -2.0258934 down |
| CCBL2        | NM_001008661 | cysteine conjugate-beta lyase 2                                | -4.073024 down  |
|              |              |                                                                | -7.913347 down  |
|              |              |                                                                | -2.8316476 down |
| ZNF556       | NM_024967    | zinc finger protein 556                                        | -4.8221555 down |
|              |              |                                                                | -3.5852954 down |
| LOC400927    | NR_002821    | TPTE and PTEN homologous inositol lipid phosphatase pseudogene | -2.7839723 down |
|              |              |                                                                | -3.0954583 down |
| HOXB6        | NM_018952    | homeobox B6                                                    | -3.160428 down  |
| KRTAP4-8     | NM_031960    | keratin associated protein 4-8                                 | -2.6519606 down |
| CNDP2        | NM_018235    | CNDP dipeptidase 2 (metallopeptidase M20 family)               | -2.2151976 down |
| LINC00371    | XR_132731    | long intergenic non-protein coding RNA 371                     | -2.1707833 down |
| LOC388387    | NR_027254    | uncharacterized LOC388387                                      | -2.6735916 down |
| DNAJC5B      | NM_033105    | DnaJ (Hsp40) homolog, subfamily C, member 5 beta               | -2.5006452 down |
| BAGE         | NM_001187    | B melanoma antigen                                             | -2.2087772 down |
|              |              |                                                                | -2.5467663 down |
| SPINK14      | NM_001001325 | serine peptidase inhibitor, Kazal type 14 (putative)           | -2.6004455 down |
| LOC442122    | AK128759     | uncharacterized LOC442122                                      | -3.5038638 down |
| OR5H1        | NM_001005338 | olfactory receptor, family 5, subfamily H, member 1            | -3.2964878 down |
|              |              |                                                                | -2.5070555 down |
| OR51M1       | NM_001004756 | olfactory receptor, family 51, subfamily M, member 1           | -2.374214 down  |
| PTGR2        | NM_152444    | prostaglandin reductase 2                                      | -8.441116 down  |
| LOC338694    | BC043531     | uncharacterized LOC338694                                      | -2.4193122 down |
| LOC100506514 | AK124637     | uncharacterized LOC100506514                                   | -5.316796 down  |
|              |              |                                                                | -4.2262087 down |
| KRTAP10-1    | NM_198691    | keratin associated protein 10-1                                | -2.0510616 down |
| EFR3B        | AB023170     | EFR3 homolog B (S. cerevisiae)                                 | -5.4527555 down |
| C12orf56     | NM_001170633 | chromosome 12 open reading frame 56                            | -2.3829932 down |
|              |              |                                                                | -2.6616418 down |
| ANKRD19P     | AK292218     | ankyrin repeat domain 19, pseudogene                           | -2.4562414 down |
|              | BX404796     |                                                                | -6.1796365 down |
| EBF2         | NM_022659    | early B-cell factor 2                                          | -4.952757 down  |
|              |              |                                                                | -2.0120137 down |
|              |              |                                                                | -4.454665 down  |
|              | BM925287     |                                                                | -2.3079445 down |
| LINC00312    | NR_024065    | long intergenic non-protein coding RNA 312                     | -2.5898385 down |
|              |              |                                                                | -3.0176022 down |

|              |              |                                                                                           |                 |
|--------------|--------------|-------------------------------------------------------------------------------------------|-----------------|
|              | AK124642     |                                                                                           | -2.088488 down  |
| SCARF2       | NM_153334    | scavenger receptor class F, member 2                                                      | -3.2063382 down |
| KRT18P55     | NR_028334    | keratin 18 pseudogene 55                                                                  | -3.00817 down   |
| C21orf56     | NM_032261    | chromosome 21 open reading frame 56                                                       | -2.1654463 down |
| ZNF503-AS1   | NR_038223    | ZNF503 antisense RNA 1 (non-protein coding)                                               | -3.3589785 down |
|              | FV367791     |                                                                                           | -2.6291692 down |
| LOC100130849 | NR_038450    | phosphorylase kinase, gamma 1 (muscle) pseudogene                                         | -2.6875086 down |
| ZDHC11       | NM_024786    | zinc finger, DHHC-type containing 11                                                      | -2.5308278 down |
| RABL2B       | BC020495     | RAB, member of RAS oncogene family-like 2B                                                | -3.8184621 down |
| LOC100132731 | XM_003403421 | uncharacterized LOC100132731                                                              | -2.2677796 down |
|              | DB153536     |                                                                                           | -2.5775142 down |
| P DPR        | NM_017990    | pyruvate dehydrogenase phosphatase regulatory subunit                                     | -3.9326153 down |
| C1orf138     | AK127688     | chromosome 1 open reading frame 138                                                       | -4.0490417 down |
| AADA CL3     | NM_001103170 | arylacetamide deacetylase-like 3                                                          | -4.7020364 down |
| REXO1L1      | NM_172239    | REX1, RNA exonuclease 1 homolog (S. cerevisiae)-like 1                                    | -3.3646264 down |
| TRIM61       | NM_001012414 | tripartite motif containing 61                                                            | -2.6063843 down |
|              | BX115986     |                                                                                           | -2.9335191 down |
| RBM43        | NM_198557    | RNA binding motif protein 43                                                              | -2.1906834 down |
| LOC284379    | NR_002938    | solute carrier family 7 (cationic amino acid transporter, y+ system), member 3 pseudogene | -2.6562598 down |
| FAM78B       | AB593134     | family with sequence similarity 78, member B                                              | -2.043585 down  |
|              | AK128457     |                                                                                           | -2.3191981 down |
|              |              |                                                                                           | -9.558157 down  |
| CCL25        | NM_005624    | chemokine (C-C motif) ligand 25                                                           | -2.8125806 down |
| STK32A       | NM_145001    | serine/threonine kinase 32A                                                               | -2.125329 down  |
| LOC100128988 | AK023614     | uncharacterized LOC100128988                                                              | -2.5201375 down |
| OR3A4P       | NR_024128    | olfactory receptor, family 3, subfamily A, member 4 pseudogene                            | -2.0444016 down |
| REG1B        | NM_006507    | regenerating islet-derived 1 beta                                                         | -2.0526686 down |
| LOC100132005 | AK092662     | uncharacterized LOC100132005                                                              | -2.2618313 down |
| MIR143HG     | NR_027180    | MIR143 host gene (non-protein coding)                                                     | -2.3195164 down |
|              | BC012174     |                                                                                           | -2.0057304 down |
| GPR21        | NM_005294    | G protein-coupled receptor 21                                                             | -3.0188227 down |
| RAPGEF1      | NM_198679    | Rap guanine nucleotide exchange factor (GEF) 1                                            | -3.2454271 down |
| SLC39A5      | NM_001135195 | solute carrier family 39 (metal ion transporter), member 5                                | -2.177772 down  |
| OR51D1       | NM_001004751 | olfactory receptor, family 51, subfamily D, member 1                                      | -2.7234256 down |
| LOC100128792 | AK128181     | uncharacterized LOC100128792                                                              | -2.9169078 down |
| PRR15        | NM_175887    | proline rich 15                                                                           | -2.8473809 down |
| ZSCAN5D      | XM_001725568 | zinc finger and SCAN domain containing 5D                                                 | -2.763367 down  |
| AANAT        | NM_001166579 | aralkylamine N-acetyltransferase                                                          | -4.4548736 down |
| KRT8         | BC007663     | keratin 8                                                                                 | -2.224495 down  |
| SPATA4       | NM_144644    | spermatogenesis associated 4                                                              | -2.0024173 down |



|               |              |                                                                                             |                 |
|---------------|--------------|---------------------------------------------------------------------------------------------|-----------------|
| UPK1A         | NM_007000    | uroplakin 1A                                                                                | -3.35515 down   |
|               |              |                                                                                             | -2.079903 down  |
| LOC728093     | XR_133401    | putative POM121-like protein 1-like                                                         | -2.1696646 down |
| SPPL2B        | NM_152988    | signal peptide peptidase-like 2B                                                            | -2.3410263 down |
| SLC38A7       | NM_018231    | solute carrier family 38, member 7                                                          | -3.6438258 down |
|               | AY129018     |                                                                                             | -2.1229484 down |
| LRRC41        | NM_006369    | leucine rich repeat containing 41                                                           | -2.4657407 down |
| OPA1          | NM_130831    | optic atrophy 1 (autosomal dominant)                                                        | -2.2762234 down |
| IL18R1        | NM_003855    | interleukin 18 receptor 1                                                                   | -4.775212 down  |
| C19orf73      | NM_018111    | chromosome 19 open reading frame 73                                                         | -2.770989 down  |
| CKMT1A        | NM_001015001 | creatine kinase, mitochondrial 1A                                                           | -3.4198341 down |
| C20orf166-AS1 | NR_033263    | C20orf166 antisense RNA 1 (non-protein coding)                                              | -3.677217 down  |
| SLC22A11      | NM_018484    | solute carrier family 22 (organic anion/urate transporter), member 11                       | -2.3128831 down |
|               | XM_003119179 |                                                                                             | -2.2614367 down |
| HTR6          | NM_000871    | 5-hydroxytryptamine (serotonin) receptor 6                                                  | -4.801688 down  |
| TRDN          | NM_001251987 | triadin                                                                                     | -2.4237154 down |
|               |              | collagen-like tail subunit (single strand of homotrimer) of asymmetric acetylcholinesterase |                 |
| COLQ          | NM_080538    |                                                                                             | -2.2697773 down |
| LOC729732     | XR_132886    | uncharacterized LOC729732                                                                   | -5.959142 down  |
| GOLGA6L1      | NM_001001413 | golgin A6 family-like 1                                                                     | -3.3031168 down |
| OR5C1         | NM_001001923 | olfactory receptor, family 5, subfamily C, member 1                                         | -2.0499384 down |
| C6orf123      | NR_026773    | chromosome 6 open reading frame 123                                                         | -3.0128644 down |
| CD300LG       | NM_145273    | CD300 molecule-like family member g                                                         | -4.8576713 down |
| CD37          | AK058093     | CD37 molecule                                                                               | -2.8741121 down |
| NXPH3         | NM_007225    | neurexophilin 3                                                                             | -2.8111084 down |
|               | AW245926     |                                                                                             | -2.7772305 down |
| HOXB3         | NM_002146    | homeobox B3                                                                                 | -3.075062 down  |
|               |              |                                                                                             | -2.4572413 down |
| TCTE1         | NM_182539    | t-complex-associated-testis-expressed 1                                                     | -2.600335 down  |
| RUSC1-AS1     | NM_001039517 | RUSC1 antisense RNA 1 (non-protein coding)                                                  | -4.7683234 down |
| LOC344887     | NR_033752    | NmrA-like family domain containing 1 pseudogene                                             | -2.1797147 down |
| CEND1         | NM_016564    | cell cycle exit and neuronal differentiation 1                                              | -2.1468523 down |
|               | BC126309     |                                                                                             | -2.3907735 down |
| RIPK3         | NM_006871    | receptor-interacting serine-threonine kinase 3                                              | -2.0493836 down |
| C3            | NM_000064    | complement component 3                                                                      | -3.0477736 down |
| SYCN          | NM_001080468 | syncollin                                                                                   | -4.126801 down  |
| SUPT3H        |              | suppressor of Ty 3 homolog ( <i>S. cerevisiae</i> )                                         | -2.5391817 down |
|               |              |                                                                                             | -2.6321282 down |
|               |              |                                                                                             | -2.601751 down  |
| TCP10L        | NM_144659    | t-complex 10 (mouse)-like                                                                   | -2.1274908 down |
| LOC285084     | NR_038897    | uncharacterized LOC285084                                                                   | -3.2387424 down |

|              |              |                                                                          |                 |
|--------------|--------------|--------------------------------------------------------------------------|-----------------|
| ODF4         | NM_153007    | outer dense fiber of sperm tails 4                                       | -2.342248 down  |
| GATA4        | FJ169610     | GATA binding protein 4                                                   | -3.4079113 down |
| L2HGDH       | NM_024884    | L-2-hydroxyglutarate dehydrogenase                                       | -7.3986907 down |
| LOC200772    | NR_033841    | uncharacterized LOC200772                                                | -2.3504179 down |
|              |              |                                                                          | -2.8248224 down |
| IKZF2        | NM_001079526 | IKAROS family zinc finger 2 (Helios)                                     | -2.096539 down  |
| FOXB2        | NM_001013735 | forkhead box B2                                                          | -2.2824314 down |
| LINC00162    | NR_024089    | long intergenic non-protein coding RNA 162                               | -2.2422283 down |
| EPHA10       | NM_001099439 | EPH receptor A10                                                         | -2.0703175 down |
| LOC400891    | NR_027006    | chromosome 14 open reading frame 166B pseudogene                         | -3.673029 down  |
| DMBT1        | NM_007329    | deleted in malignant brain tumors 1                                      | -5.0211787 down |
| TTBK1        | NM_032538    | tau tubulin kinase 1                                                     | -3.3152597 down |
|              |              |                                                                          | -4.1136 down    |
| LOC151009    | NR_027244    | uncharacterized LOC151009                                                | -2.214634 down  |
| CA10         | NM_020178    | carbonic anhydrase X                                                     | -2.1008806 down |
| PTCH1        | AB214500     | patched 1                                                                | -5.1449695 down |
| KLK13        | AY923173     | kallikrein-related peptidase 13                                          | -2.6436265 down |
| TNFRSF13C    | NM_052945    | tumor necrosis factor receptor superfamily, member 13C                   | -2.2379334 down |
| SLC22A7      | NM_153320    | solute carrier family 22 (organic anion transporter), member 7           | -3.2391326 down |
|              |              |                                                                          | -3.094894 down  |
|              | XR_109862    |                                                                          | -2.6796117 down |
| SPRR1A       | NM_005987    | small proline-rich protein 1A                                            | -2.1431 down    |
|              |              |                                                                          | -2.2449286 down |
| OTOP3        | NM_178233    | otopetrin 3                                                              | -2.1958504 down |
| LOC100127885 | XM_001721771 | uncharacterized LOC100127885                                             | -3.6513202 down |
| PLEKHN1      | NM_032129    | pleckstrin homology domain containing, family N member 1                 | -4.4371614 down |
| TNP1         | NM_003284    | transition protein 1 (during histone to protamine replacement)           | -3.239564 down  |
| C14orf48     | NR_024182    | chromosome 14 open reading frame 48                                      | -13.302271 down |
|              |              |                                                                          | -3.5029771 down |
| PEX11G       | NM_080662    | peroxisomal biogenesis factor 11 gamma                                   | -4.0354238 down |
| PREX2        | NM_025170    | phosphatidylinositol-3,4,5-trisphosphate-dependent Rac exchange factor 2 | -2.5224254 down |
| NTRK3        | AK094929     | neurotrophic tyrosine kinase, receptor, type 3                           | -3.1561337 down |
|              |              |                                                                          | -6.5622582 down |
| PDPN         | NM_198389    | podoplanin                                                               | -2.4606566 down |
|              |              |                                                                          | -3.6976383 down |
| LOC653061    | NR_038843    | golgin A8 family, member B pseudogene                                    | -6.2678037 down |
| PDE4D        | NM_001197218 | phosphodiesterase 4D, cAMP-specific                                      | -3.2914772 down |
|              |              |                                                                          | -2.5822186 down |
| AP4M1        | NM_004722    | adaptor-related protein complex 4, mu 1 subunit                          | -2.6249983 down |
| C9orf62      | XR_109856    | chromosome 9 open reading frame 62                                       | -2.6012628 down |

|             |              |                                                                                         |                 |
|-------------|--------------|-----------------------------------------------------------------------------------------|-----------------|
| SALL4       | NM_020436    | sal-like 4 (Drosophila)                                                                 | -7.585921 down  |
|             | AK128018     |                                                                                         | -2.0155284 down |
| NUP43       | NM_198887    | nucleoporin 43kDa                                                                       | -2.0761888 down |
| PCDH10      | NM_020815    | protocadherin 10                                                                        | -3.8829024 down |
|             |              |                                                                                         | -4.033067 down  |
|             |              |                                                                                         | -2.1923654 down |
| MUC2        | NM_002457    | mucin 2, oligomeric mucus/gel-forming                                                   | -2.0623684 down |
| NME9        | NM_178130    | NME gene family member 9                                                                | -2.1936576 down |
| SYT6        | NM_205848    | synaptotagmin VI                                                                        | -2.5053356 down |
| LOC283038   | NR_033848    | uncharacterized LOC283038                                                               | -3.2461724 down |
| PDDC1       | NM_182612    | Parkinson disease 7 domain containing 1                                                 | -2.0845392 down |
| HES6        | NM_018645    | hairy and enhancer of split 6 (Drosophila)                                              | -3.6653175 down |
| YIPF7       | NM_182592    | Yip1 domain family, member 7                                                            | -2.478259 down  |
| C20orf173   | NM_001145350 | chromosome 20 open reading frame 173                                                    | -2.5379503 down |
| HMCN1       | NM_031935    | hemicentin 1                                                                            | -4.2775693 down |
| TMCO5A      | NM_152453    | transmembrane and coiled-coil domains 5A                                                | -2.5085406 down |
| FAM22D      | NM_001009610 | family with sequence similarity 22, member D                                            | -2.1489017 down |
| H2AFB2      | NM_001017991 | H2A histone family, member B2                                                           | -2.1886191 down |
| OR8H2       | NM_001005200 | olfactory receptor, family 8, subfamily H, member 2                                     | -6.4763327 down |
| C2orf27A    | NM_013310    | chromosome 2 open reading frame 27A                                                     | -2.1131563 down |
| LOC389607   | XR_110088    | uncharacterized LOC389607                                                               | -2.7484398 down |
|             |              | solute carrier family 25 (mitochondrial carrier; Graves disease autoantigen), member 16 | -4.07135 down   |
| SLC25A16    | BC001407     |                                                                                         | -4.07135 down   |
| FLJ41649    | NR_038887    | uncharacterized LOC401260                                                               | -2.1117842 down |
| POMT2       | NM_013382    | protein-O-mannosyltransferase 2                                                         | -2.5679996 down |
| FLG         | NM_002016    | filaggrin                                                                               | -4.5268593 down |
| CREB3L3     | NM_032607    | cAMP responsive element binding protein 3-like 3                                        | -5.5571895 down |
| LOC283335   | NR_033854    | uncharacterized LOC283335                                                               | -2.1808505 down |
| ERBB3       | NM_001005915 | v-erb-b2 erythroblastic leukemia viral oncogene homolog 3 (avian)                       | -2.7754562 down |
| OR2A7       | NM_001005328 | olfactory receptor, family 2, subfamily A, member 7                                     | -2.298693 down  |
| FANCA       | NM_001018112 | Fanconi anemia, complementation group A                                                 | -2.0050056 down |
| DCAF8       | NM_015726    | DDB1 and CUL4 associated factor 8                                                       | -2.1286006 down |
| GPR123      | NM_001083909 | G protein-coupled receptor 123                                                          | -2.4919996 down |
| HIST1H2APS1 | NR_045125    | histone cluster 1, H2a, pseudogene 1                                                    | -2.6281953 down |
|             |              | transmembrane phosphoinositide 3-phosphatase and tensin homolog 2 pseudogene 3          | -2.5212119 down |
| TPTE2P3     | NR_002793    |                                                                                         | -2.5212119 down |
| TMEM139     | NM_153345    | transmembrane protein 139                                                               | -2.4233544 down |
| TINAG       | NM_014464    | tubulointerstitial nephritis antigen                                                    | -2.2303288 down |
| SNCAIP      | NM_005460    | synuclein, alpha interacting protein                                                    | -2.3968954 down |
|             |              |                                                                                         | -12.246122 down |
|             |              |                                                                                         | -3.070447 down  |
| FOXA1       |              | forkhead box A1                                                                         | -3.9074488 down |

|           |              |                                                                          |                 |
|-----------|--------------|--------------------------------------------------------------------------|-----------------|
| OR51E1    | NM_152430    | olfactory receptor, family 51, subfamily E, member 1                     | -2.1475463 down |
|           |              |                                                                          | -3.3969452 down |
|           | XR_110942    |                                                                          | -3.2308414 down |
| TPBG      | NM_006670    | trophoblast glycoprotein                                                 | -3.1373882 down |
| SLC5A6    | NM_021095    | solute carrier family 5 (sodium-dependent vitamin transporter), member 6 | -2.4534147 down |
| PDXK      | AK094630     | pyridoxal (pyridoxine, vitamin B6) kinase                                | -2.0311298 down |
| FGF17     | NM_003867    | fibroblast growth factor 17                                              | -4.1033063 down |
| CFLAR     | NM_001202519 | CASP8 and FADD-like apoptosis regulator                                  | -4.6703625 down |
|           |              |                                                                          | -2.7066426 down |
| RP1L1     | AK127545     | retinitis pigmentosa 1-like 1                                            | -2.7269533 down |
| TNXB      | NM_019105    | tenascin XB                                                              | -4.3601375 down |
| OR1F1     | NM_012360    | olfactory receptor, family 1, subfamily F, member 1                      | -4.514842 down  |
| MRGPRD    | NM_198923    | MAS-related GPR, member D                                                | -3.5890746 down |
| LRRN4     | NM_152611    | leucine rich repeat neuronal 4                                           | -2.4662676 down |
| C1QTNF7   | NM_031911    | C1q and tumor necrosis factor related protein 7                          | -2.151715 down  |
| ZNF812    | NM_001199814 | zinc finger protein 812                                                  | -2.6769469 down |
| C21orf30  | XR_109680    | chromosome 21 open reading frame 30                                      | -2.4871452 down |
| LOC399829 | XR_109033    | uncharacterized LOC399829                                                | -3.4007292 down |
| NRN1      | NM_016588    | neuritin 1                                                               | -2.3697023 down |
| YJEFN3    | NM_198537    | YjeF N-terminal domain containing 3                                      | -2.1582272 down |
| NDP       | NM_000266    | Norrie disease (pseudoglioma)                                            | -2.5220702 down |
| PFKL      | NM_002626    | phosphofructokinase, liver                                               | -4.5982337 down |
|           |              |                                                                          | -6.0992327 down |
| NRG1      | NM_004495    | neuregulin 1                                                             | -3.5246947 down |
| MYLK2     | NM_033118    | myosin light chain kinase 2                                              | -3.6064427 down |
| TTLL9     | NM_001008409 | tubulin tyrosine ligase-like family, member 9                            | -3.0298066 down |
|           |              |                                                                          | -3.7075272 down |
| BEST3     | NM_032735    | bestrophin 3                                                             | -4.591873 down  |
| GSG1      | NM_001080554 | germ cell associated 1                                                   | -4.001791 down  |
|           | AK094832     |                                                                          | -2.579876 down  |
| FAM27L    | NR_028336    | family with sequence similarity 27-like                                  | -3.7409658 down |
|           |              |                                                                          | -3.6939983 down |
|           |              |                                                                          | -2.902639 down  |
| MLPH      | NM_024101    | melanophilin                                                             | -2.6889625 down |
| FBXW8     | NM_153348    | F-box and WD repeat domain containing 8                                  | -2.5005636 down |
| COL5A1    | AK057231     | collagen, type V, alpha 1                                                | -4.067668 down  |
|           | XM_001725354 |                                                                          | -2.533428 down  |
| LMOD3     | NM_198271    | leiomodrin 3 (fetal)                                                     | -2.187952 down  |
|           |              |                                                                          | -3.7325935 down |
| GRAMD2    | NM_001012642 | GRAM domain containing 2                                                 | -2.04428 down   |

|              |              |                                                                                           |                 |
|--------------|--------------|-------------------------------------------------------------------------------------------|-----------------|
| DMC1         | NM_007068    | DMC1 dosage suppressor of mck1 homolog, meiosis-specific homologous recombination (yeast) | -2.5993614 down |
| ANKMY1       | NM_017844    | ankyrin repeat and MYND domain containing 1                                               | -3.5635881 down |
| GNRHR        | NM_000406    | gonadotropin-releasing hormone receptor                                                   | -2.2511566 down |
| CDC14C       | NR_003595    | CDC14 cell division cycle 14 homolog C (S. cerevisiae)                                    | -2.0562453 down |
| DNM1P46      | NR_003260    | DNM1 pseudogene 46                                                                        | -3.9727767 down |
| MERTK        |              | c-mer proto-oncogene tyrosine kinase                                                      | -2.5086474 down |
| SYNE2        | NM_015180    | spectrin repeat containing, nuclear envelope 2                                            | -2.7720377 down |
| PLSCR4       | NM_020353    | phospholipid scramblase 4                                                                 | -2.0200844 down |
| CSF1         | NM_000757    | colony stimulating factor 1 (macrophage)                                                  | -2.3409243 down |
| YEATS2       | AK090720     | YEATS domain containing 2                                                                 | -2.1613255 down |
| PTGR1        | NM_012212    | prostaglandin reductase 1                                                                 | -2.6007707 down |
|              |              |                                                                                           | -3.0213652 down |
| KCTD1        | NM_198991    | potassium channel tetramerisation domain containing 1                                     | -2.3955479 down |
| ATE1         | NM_001001976 | arginyltransferase 1                                                                      | -2.19486 down   |
| TMEM174      | NM_153217    | transmembrane protein 174                                                                 | -5.9497805 down |
| FLJ25363     | NM_001145553 | uncharacterized LOC401082                                                                 | -2.0607967 down |
| GRM6         |              | glutamate receptor, metabotropic 6                                                        | -4.476083 down  |
|              |              |                                                                                           | -3.219986 down  |
| ZNF3         | NM_017715    | zinc finger protein 3                                                                     | -4.0247526 down |
| DBC1         | BC021560     | deleted in bladder cancer 1                                                               | -2.245867 down  |
| C8orf44-SGK3 | NM_001204173 | C8orf44-SGK3 readthrough                                                                  | -2.4135082 down |
|              |              |                                                                                           | -2.2181242 down |
| CRMP1        | NM_001014809 | collapsin response mediator protein 1                                                     | -4.3283453 down |
|              |              |                                                                                           | -2.093263 down  |
| SSTR5        | NM_001053    | somatostatin receptor 5                                                                   | -2.121615 down  |
| LOC728208    | XR_108453    | uncharacterized LOC728208                                                                 | -4.2462087 down |
| RGR          | BC008094     | retinal G protein coupled receptor                                                        | -2.877186 down  |
| HAND2        | NM_021973    | heart and neural crest derivatives expressed 2                                            | -2.0427072 down |
| PRH2         | NM_005042    | proline-rich protein HaellI subfamily 2                                                   | -2.0849574 down |
|              | JN120858     |                                                                                           | -2.7122898 down |
| FAM48B2      | NM_001136233 | family with sequence similarity 48, member B2                                             | -3.7483592 down |
| NPAS1        | NM_002517    | neuronal PAS domain protein 1                                                             | -2.5409536 down |
| COL6A4P2     | NR_027898    | collagen, type VI, alpha 4 pseudogene 2                                                   | -2.4015937 down |
| PODNL1       | NM_024825    | podocan-like 1                                                                            | -5.9561896 down |
| DERL3        | NM_198440    | Der1-like domain family, member 3                                                         | -2.358331 down  |
| GPR115       | NM_153838    | G protein-coupled receptor 115                                                            | -2.7746212 down |
| DND1         | NM_194249    | dead end homolog 1 (zebrafish)                                                            | -2.0638418 down |
| LOC100129125 | AK125712     | uncharacterized LOC100129125                                                              | -3.7789106 down |
| CDH16        | NM_004062    | cadherin 16, KSP-cadherin                                                                 | -2.9937773 down |
| LOC100132014 | AK092445     | uncharacterized LOC100132014                                                              | -3.343256 down  |

|              |              |                                                                                                         |                 |
|--------------|--------------|---------------------------------------------------------------------------------------------------------|-----------------|
| LOC644093    | XR_132708    | hCG2040054                                                                                              | -2.7517478 down |
|              | BC010426     |                                                                                                         | -3.6751964 down |
| ABCA9        | NM_080283    | ATP-binding cassette, sub-family A (ABC1), member 9                                                     | -2.8953872 down |
|              |              |                                                                                                         | -2.0809124 down |
|              |              |                                                                                                         | -2.2386808 down |
| SMCR7L       | NM_019008    | Smith-Magenis syndrome chromosome region, candidate 7-like                                              | -2.1880252 down |
| TCL6         | NR_028288    | T-cell leukemia/lymphoma 6 (non-protein coding)                                                         | -3.5812922 down |
| MMACHC       | NM_015506    | methylmalonic aciduria (cobalamin deficiency) cblC type, with homocystinuria                            | -2.6416502 down |
| FARP1        | NM_005766    | FERM, RhoGEF (ARHGEF) and pleckstrin domain protein 1 (chondrocyte-derived)                             | -2.2835436 down |
| LSM14B       | NM_144703    | LSM14B, SCD6 homolog B ( <i>S. cerevisiae</i> )                                                         | -2.4017031 down |
|              |              |                                                                                                         | -3.2970088 down |
| RCL1         |              | RNA terminal phosphate cyclase-like 1                                                                   | -3.0049343 down |
| DPP6         | NM_001039350 | dipeptidyl-peptidase 6                                                                                  | -4.514639 down  |
| CD209        | NM_021155    | CD209 molecule                                                                                          | -2.4687397 down |
| FOXP3        | NM_014009    | forkhead box P3                                                                                         | -2.0533419 down |
| LOC100270679 | NR_038394    | uncharacterized LOC100270679                                                                            | -2.6754577 down |
| TMEM89       | NM_001008269 | transmembrane protein 89                                                                                | -2.730447 down  |
|              |              | UDP-N-acetyl-alpha-D-galactosamine:polypeptide N-acetylgalactosaminyltransferase 9 ( <i>GalNAc-T9</i> ) | -2.3163168 down |
| GALNT9       | NM_021808    |                                                                                                         |                 |
| SLC19A3      | NM_025243    | solute carrier family 19, member 3                                                                      | -2.0669942 down |
| TMEM235      | NM_001204210 | transmembrane protein 235                                                                               | -10.200586 down |
|              |              |                                                                                                         | -4.1268883 down |
| ARHGEF38     | NM_017700    | Rho guanine nucleotide exchange factor (GEF) 38                                                         | -2.9027936 down |
| PRODH        | BC036534     | proline dehydrogenase (oxidase) 1                                                                       | -4.231664 down  |
| GJD4         | NM_153368    | gap junction protein, delta 4, 40.1kDa                                                                  | -2.0357091 down |
| VPS37A       | AL834189     | vacuolar protein sorting 37 homolog A ( <i>S. cerevisiae</i> )                                          | -2.7135425 down |
| GDNF         | NM_001190468 | glial cell derived neurotrophic factor                                                                  | -2.4422011 down |
| LOC283392    | NR_026836    | uncharacterized LOC283392                                                                               | -2.1587815 down |
|              | AW593215     |                                                                                                         | -2.9488413 down |
| GHRLOS       | NR_004431    | ghrelin opposite strand/antisense RNA (non-protein coding)                                              | -2.9478412 down |
| LOC345051    | XR_109844    | hCG38984                                                                                                | -3.3789592 down |
|              |              |                                                                                                         | -2.1716497 down |
| LOC100144602 | NR_034138    | uncharacterized LOC100144602                                                                            | -3.4381387 down |
|              |              | pleckstrin homology domain containing, family G (with RhoGef domain) member 5                           | -2.3795633 down |
| PLEKHG5      | NM_198681    |                                                                                                         |                 |
| CHI3L1       | NM_001276    | chitinase 3-like 1 (cartilage glycoprotein-39)                                                          | -2.1526206 down |
|              | DA797466     |                                                                                                         | -4.107947 down  |
| RNF165       | NM_152470    | ring finger protein 165                                                                                 | -2.897544 down  |
| MORN1        | NM_024848    | MORN repeat containing 1                                                                                | -4.779135 down  |
| USHBP1       | NM_031941    | Usher syndrome 1C binding protein 1                                                                     | -5.4821634 down |
| GOLGA6A      | NM_001038640 | golgin A6 family, member A                                                                              | -3.289856 down  |

|           |              |                                                                                     |                 |
|-----------|--------------|-------------------------------------------------------------------------------------|-----------------|
| SCARA5    | NM_173833    | scavenger receptor class A, member 5 (putative)                                     | -3.1757426 down |
| ASIP      | NM_001672    | agouti signaling protein                                                            | -3.1825237 down |
|           |              |                                                                                     | -2.0611525 down |
| SPRR2B    | NM_001017418 | small proline-rich protein 2B                                                       | -2.376864 down  |
| LINC00087 | NR_024493    | long intergenic non-protein coding RNA 87                                           | -2.7784214 down |
| PXMP2     | BC009836     | peroxisomal membrane protein 2, 22kDa                                               | -2.032861 down  |
| AIF1L     |              | allograft inflammatory factor 1-like                                                | -2.1419098 down |
| FRG2      | NM_001005217 | FSHD region gene 2                                                                  | -3.2779982 down |
| LYZL2     | NM_183058    | lysozyme-like 2                                                                     | -2.972997 down  |
|           |              |                                                                                     | -3.2739453 down |
| GREB1     | BC071853     | growth regulation by estrogen in breast cancer 1                                    | -3.4169838 down |
| PNMA6A    | NM_032882    | paraneoplastic antigen like 6A                                                      | -2.3811274 down |
| C8orf37   | NM_177965    | chromosome 8 open reading frame 37                                                  | -2.026593 down  |
|           | AJ003549     |                                                                                     | -3.9372993 down |
| SLC26A7   | NM_052832    | solute carrier family 26, member 7                                                  | -3.6869466 down |
|           |              |                                                                                     | -3.2151647 down |
| LOC285972 | NR_034033    | uncharacterized LOC285972                                                           | -2.487889 down  |
|           |              |                                                                                     | -5.557467 down  |
|           |              |                                                                                     | -2.5298479 down |
| MPPED1    | NM_001044370 | metallophosphoesterase domain containing 1                                          | -5.874022 down  |
| DBIL5P2   | NR_036635    | diazepam binding inhibitor-like 5 pseudogene 2                                      | -3.0367873 down |
| MED1      | NM_004774    | mediator complex subunit 1                                                          | -4.8572793 down |
| GUCY2D    | NM_000180    | guanylate cyclase 2D, membrane (retina-specific)                                    | -2.2980378 down |
| MGC21881  | AK127789     | uncharacterized locus MGC21881                                                      | -2.4019768 down |
|           | AK026667     |                                                                                     | -3.575991 down  |
|           | CD694834     |                                                                                     | -6.289534 down  |
| CASS4     | NM_001164115 | Cas scaffolding protein family member 4                                             | -2.1462932 down |
| FLJ32224  | AK056786     | uncharacterized LOC440584                                                           | -3.794238 down  |
| BLACE     | AY166699     | B-cell acute lymphoblastic leukemia expressed                                       | -2.6677935 down |
| SLC9A7    | NM_032591    | solute carrier family 9 (sodium/hydrogen exchanger), member 7                       | -2.1704664 down |
| CCBE1     | NM_133459    | collagen and calcium binding EGF domains 1                                          | -2.804313 down  |
| OPN5      | NM_181744    | opsin 5                                                                             | -3.137884 down  |
| INADL     | AJ001306     | InaD-like (Drosophila)                                                              | -2.2827427 down |
| CCDC40    | NM_001243342 | coiled-coil domain containing 40                                                    | -2.201744 down  |
| LOC389602 | XR_108709    | uncharacterized LOC389602                                                           | -2.602459 down  |
|           | BX648392     |                                                                                     | -2.781433 down  |
| LOC440297 | NR_033579    | chondroitin sulfate proteoglycan 4 pseudogene                                       | -3.6204724 down |
| CHDH      | NM_018397    | choline dehydrogenase                                                               | -2.5915337 down |
|           |              | nuclear factor of kappa light polypeptide gene enhancer in B-cells inhibitor-like 1 |                 |
| NFKBIL1   | NM_001144961 |                                                                                     | -2.2580805 down |
| ZNF717    | NM_001128223 | zinc finger protein 717                                                             | -2.0979207 down |

|              |              |                                                                      |                 |
|--------------|--------------|----------------------------------------------------------------------|-----------------|
| TMEM190      | NM_139172    | transmembrane protein 190                                            | -2.5993617 down |
| TSGA10       | NM_025244    | testis specific, 10                                                  | -2.0500958 down |
|              | DA992326     |                                                                      | -4.113459 down  |
| DEFB121      | NM_001171832 | defensin, beta 121                                                   | -5.5644264 down |
| LINC00028    | NR_024358    | long intergenic non-protein coding RNA 28                            | -2.429259 down  |
| TRIM36       | NM_001017397 | tripartite motif containing 36                                       | -2.3733952 down |
| ITIH3        | NM_002217    | inter-alpha-trypsin inhibitor heavy chain 3                          | -4.883746 down  |
| TRPC6        | NM_004621    | transient receptor potential cation channel, subfamily C, member 6   | -2.5640135 down |
| LRIT2        | NM_001017924 | leucine-rich repeat, immunoglobulin-like and transmembrane domains 2 | -2.9736469 down |
|              | BC029571     |                                                                      | -3.9679463 down |
| CCL19        | NM_006274    | chemokine (C-C motif) ligand 19                                      | -2.143954 down  |
| TRIM53P      | NR_028346    | tripartite motif containing 53, pseudogene                           | -2.2950032 down |
| ARHGEF33     | NM_001145451 | Rho guanine nucleotide exchange factor (GEF) 33                      | -4.3038073 down |
| BPIFC        | NM_174932    | BPI fold containing family C                                         | -2.704431 down  |
| LOC100130015 | NR_027335    | 5-hydroxyisourate hydrolase pseudogene                               | -2.9379911 down |
| ACTR3C       | BX640643     | ARP3 actin-related protein 3 homolog C (yeast)                       | -2.0208564 down |
| PEX26        | NM_001199319 | peroxisomal biogenesis factor 26                                     | -2.410133 down  |
| EFR3B        | NM_014971    | EFR3 homolog B ( <i>S. cerevisiae</i> )                              | -2.909654 down  |
| HYAL4        | NM_012269    | hyaluronoglucosaminidase 4                                           | -2.448535 down  |
| ANGPTL4      | NM_139314    | angiopoietin-like 4                                                  | -2.9992814 down |
| SLC38A4      | NM_018018    | solute carrier family 38, member 4                                   | -3.050788 down  |
| C1QA         | NM_015991    | complement component 1, q subcomponent, A chain                      | -2.0644414 down |
| RAB19        | NM_001008749 | RAB19, member RAS oncogene family                                    | -5.7299867 down |
|              | AK307375     |                                                                      | -4.9440103 down |
| LY6K         | NM_017527    | lymphocyte antigen 6 complex, locus K                                | -3.219032 down  |
|              | DA858408     |                                                                      | -2.912551 down  |
| FAT2         | NM_001447    | FAT tumor suppressor homolog 2 ( <i>Drosophila</i> )                 | -2.0715022 down |
|              |              |                                                                      | -2.9836261 down |
| FLJ40039     | AK097358     | uncharacterized LOC647662                                            | -7.3407874 down |
| ASRGL1       | NM_001083926 | asparaginase like 1                                                  | -2.5058482 down |
| ZFP64        | NM_199427    | zinc finger protein 64 homolog (mouse)                               | -2.336841 down  |
| HPSE2        | NM_021828    | heparanase 2                                                         | -2.1212192 down |
|              |              |                                                                      | -2.7351577 down |
| PROX2        | NM_001243007 | prospero homeobox 2                                                  | -2.7758756 down |
|              | A25493       |                                                                      | -4.0344954 down |
| LOC100128402 | AK124574     | uncharacterized LOC100128402                                         | -2.0488076 down |
| GABRR3       | NM_001105580 | gamma-aminobutyric acid (GABA) receptor, rho 3                       | -2.021903 down  |
| SIX1         | NM_005982    | SIX homeobox 1                                                       | -6.201456 down  |
|              | AK097701     |                                                                      | -6.688405 down  |
| C15orf42     | NM_152259    | chromosome 15 open reading frame 42                                  | -2.2031682 down |
| PRR23B       | NM_001013650 | proline rich 23B                                                     | -2.3621576 down |



|              |              |                                                                                 |                 |
|--------------|--------------|---------------------------------------------------------------------------------|-----------------|
| LBH          | NM_030915    | limb bud and heart development homolog (mouse)                                  | -2.0417814 down |
| C17orf107    | NM_001145536 | chromosome 17 open reading frame 107                                            | -2.8604891 down |
| PROM2        | NM_144707    | prominin 2                                                                      | -2.370941 down  |
| ANP32A       | AK127498     | acidic (leucine-rich) nuclear phosphoprotein 32 family, member A                | -2.457489 down  |
| C14orf165    | NR_024081    | chromosome 14 open reading frame 165                                            | -2.379098 down  |
| LOC100129620 | NR_033940    | uncharacterized LOC100129620                                                    | -2.074432 down  |
| LEPR         | NM_001003680 | leptin receptor                                                                 | -2.1868777 down |
| RDX          | DQ916738     | radixin                                                                         | -3.0268786 down |
| HTATSF1P2    | BX648511     | HIV-1 Tat specific factor 1 pseudogene 2                                        | -2.7865615 down |
| SPIRE1       | NM_001128626 | spire homolog 1 (Drosophila)                                                    | -2.4888685 down |
| LOC283888    | NR_037158    | uncharacterized LOC283888                                                       | -2.1284125 down |
|              |              |                                                                                 | -3.9829996 down |
| C15orf59     | NM_001039614 | chromosome 15 open reading frame 59                                             | -3.7594361 down |
| TNC          | NM_002160    | tenascin C                                                                      | -3.2533302 down |
| MAP1LC3C     | NM_001004343 | microtubule-associated protein 1 light chain 3 gamma                            | -2.7137017 down |
| SDCBP2       | NM_080489    | syndecan binding protein (syntenin) 2                                           | -4.48174 down   |
|              |              |                                                                                 | -2.434551 down  |
| FLJ44385     | AK126356     | uncharacterized FLJ44385                                                        | -2.2554266 down |
|              |              |                                                                                 | -2.793236 down  |
| ETV3         | NM_001145312 | ets variant 3                                                                   | -3.0406468 down |
| LPA          | NM_005577    | lipoprotein, Lp(a)                                                              | -2.0264592 down |
|              |              |                                                                                 | -2.1148758 down |
| ERC2         | NM_015576    | ELKS/RAB6-interacting/CAST family member 2                                      | -2.3619015 down |
| TMEM52       | NM_178545    | transmembrane protein 52                                                        | -5.5612707 down |
| C1orf49      |              | chromosome 1 open reading frame 49                                              | -2.3776698 down |
| CYP2G1P      | NR_040249    | cytochrome P450, family 2, subfamily G, polypeptide 1 pseudogene                | -2.275448 down  |
| LOC100289094 | BC025775     | uncharacterized LOC100289094                                                    | -3.3646216 down |
|              |              |                                                                                 | -4.065298 down  |
| PTPRQ        | NM_001145026 | protein tyrosine phosphatase, receptor type, Q                                  | -3.1092496 down |
| SEMA6C       | NM_030913    | sema domain, transmembrane domain (TM), and cytoplasmic domain, (semaphorin) 6C | -5.4617624 down |
| LOC100130954 | NR_034016    | uncharacterized LOC100130954                                                    | -6.72411 down   |
|              |              |                                                                                 | -3.1852295 down |
| DIO3         | NM_001362    | deiodinase, iodothyronine, type III                                             | -4.2080483 down |
|              | XM_001129515 |                                                                                 | -2.254708 down  |
| IFNA4        | NM_021068    | interferon, alpha 4                                                             | -2.1906059 down |
|              |              |                                                                                 | -3.3933635 down |
| PRAMEF5      | NM_001013407 | PRAME family member 5                                                           | -2.5051455 down |
| ANO7         | NM_001001891 | anoctamin 7                                                                     | -3.3846624 down |
| LOC100130800 | XM_001719118 | uncharacterized LOC100130800                                                    | -5.701493 down  |
|              | XR_109597    |                                                                                 | -4.041795 down  |

|              |              |                                                          |                 |
|--------------|--------------|----------------------------------------------------------|-----------------|
| PTH1R        | AK094114     | parathyroid hormone 1 receptor                           | -2.1353686 down |
| LOC728196    | BC021736     | uncharacterized LOC728196                                | -3.0604086 down |
| CDH23        | NM_052836    | cadherin-related 23                                      | -3.5766797 down |
| TP53AIP1     | NM_001195195 | tumor protein p53 regulated apoptosis inducing protein 1 | -5.6300135 down |
| ZNF521       | NM_015461    | zinc finger protein 521                                  | -4.9204555 down |
| STRC         | NM_153700    | stereocilin                                              | -2.8344922 down |
| LOC100652869 | XM_003403453 | uncharacterized LOC100652869                             | -2.2566817 down |
| TMEM54       | NM_033504    | transmembrane protein 54                                 | -3.4771028 down |
| LOC100128081 | NR_034097    | uncharacterized LOC100128081                             | -2.2433896 down |
| FAM115A      | NM_014719    | family with sequence similarity 115, member A            | -2.120631 down  |
|              |              |                                                          | -2.7800899 down |
| C16orf89     | NM_152459    | chromosome 16 open reading frame 89                      | -2.626226 down  |
| FBLL1        | NR_024356    | fibrillarlin-like 1                                      | -2.3722076 down |
|              | M27336       |                                                          | -3.7871387 down |
| C1orf146     |              | chromosome 1 open reading frame 146                      | -2.549752 down  |
| ELK1         | NM_001114123 | ELK1, member of ETS oncogene family                      | -2.2374234 down |
| FAM157A      | NM_001145248 | family with sequence similarity 157, member A            | -3.2728245 down |
| SLC45A2      | NM_016180    | solute carrier family 45, member 2                       | -2.7646308 down |
| LOC645206    | NR_038840    | uncharacterized LOC645206                                | -2.0339217 down |
| FSTL3        | NM_005860    | follistatin-like 3 (secreted glycoprotein)               | -3.5463393 down |
| MRPL38       | AK024058     | mitochondrial ribosomal protein L38                      | -2.3964107 down |
|              |              |                                                          | -3.3816366 down |
|              |              |                                                          | -4.0391006 down |
| MC5R         | NM_005913    | melanocortin 5 receptor                                  | -2.533881 down  |
| CELF6        | NM_001172684 | CUGBP, Elav-like family member 6                         | -2.6516817 down |
| LOC100131048 | AK125976     | uncharacterized LOC100131048                             | -2.0402286 down |
| FAM183B      | NR_028347    | acyloxyacyl hydrolase (neutrophil)                       | -2.2025957 down |
| USP37        | NM_020935    | ubiquitin specific peptidase 37                          | -2.4631536 down |
| DDI2         | NM_032341    | DNA-damage inducible 1 homolog 2 (S. cerevisiae)         | -2.230267 down  |
| OR2G2        | NM_001001915 | olfactory receptor, family 2, subfamily G, member 2      | -2.0096073 down |
| POTEE        | NM_001083538 | POTE ankyrin domain family, member E                     | -4.067189 down  |
|              |              |                                                          | -2.7782009 down |
| CCDC144A     | NM_014695    | coiled-coil domain containing 144A                       | -2.0681257 down |
| HLA-DPB1     |              | major histocompatibility complex, class II, DP beta 1    | -3.4620607 down |
|              | XM_003118626 |                                                          | -2.1988246 down |
| GRID1        | NM_017551    | glutamate receptor, ionotropic, delta 1                  | -3.1634269 down |
| HNRNPA3      | NM_194247    | heterogeneous nuclear ribonucleoprotein A3               | -2.4045832 down |
| INSC         | NM_001031853 | inscuteable homolog (Drosophila)                         | -2.2724304 down |
| APOB         | BC051278     | apolipoprotein B (including Ag(x) antigen)               | -2.2254267 down |
|              |              |                                                          | -3.0753853 down |
| LINC00256B   | NR_024376    | long intergenic non-protein coding RNA 256B              | -2.7571151 down |

|              |              |                                                               |                 |
|--------------|--------------|---------------------------------------------------------------|-----------------|
|              |              |                                                               | -5.587338 down  |
|              |              |                                                               | -3.195272 down  |
| FAM167A      | NM_053279    | family with sequence similarity 167, member A                 | -2.0159037 down |
| LOC146795    | AK057377     | uncharacterized LOC146795                                     | -5.6406894 down |
| C9orf84      | NM_173521    | chromosome 9 open reading frame 84                            | -2.2580492 down |
| C2orf43      |              | chromosome 2 open reading frame 43                            | -2.4308124 down |
| ZNF577       | NR_024181    | zinc finger protein 577                                       | -2.9011743 down |
| BCL9L        | NM_182557    | B-cell CLL/lymphoma 9-like                                    | -2.2818851 down |
|              | CR627426     |                                                               | -4.066877 down  |
| GAMT         | NM_138924    | guanidinoacetate N-methyltransferase                          | -3.1134667 down |
|              | D43770       |                                                               | -3.5790865 down |
| PYCR1        | NM_006907    | pyrroline-5-carboxylate reductase 1                           | -2.8095202 down |
| LOC100127885 | XM_001721771 | uncharacterized LOC100127885                                  | -4.0095925 down |
| IQCA1        | NM_024726    | IQ motif containing with AAA domain 1                         | -2.4238458 down |
| PRODH        | NM_016335    | proline dehydrogenase (oxidase) 1                             | -3.0909398 down |
| CLDN3        | NM_001306    | claudin 3                                                     | -2.3020046 down |
| PDZRN3       | BC014432     | PDZ domain containing ring finger 3                           | -2.4092207 down |
| FFAR1        | NM_005303    | free fatty acid receptor 1                                    | -2.0572886 down |
| ZPBP         | NM_007009    | zona pellucida binding protein                                | -2.4437635 down |
| EXPH5        | NM_015065    | exophilin 5                                                   | -2.3969522 down |
|              |              |                                                               | -3.677437 down  |
|              |              |                                                               | -2.5446966 down |
| IL24         | NM_001185156 | interleukin 24                                                | -14.694345 down |
| AQP12A       | NM_198998    | aquaporin 12A                                                 | -2.184617 down  |
| FLJ41327     | AK123321     | FLJ41327 protein                                              | -2.5390434 down |
|              | XR_132470    |                                                               | -2.3826046 down |
| PRAMEF13     | NM_001024661 | PRAME family member 13                                        | -3.3176877 down |
|              |              |                                                               | -2.4075794 down |
| C21orf88     | NR_026543    | chromosome 21 open reading frame 88                           | -3.1465907 down |
| ZNF502       | NM_033210    | zinc finger protein 502                                       | -2.3460853 down |
|              | AF116680     |                                                               | -2.1041095 down |
| PARD3        |              | par-3 partitioning defective 3 homolog (C. elegans)           | -3.5658984 down |
|              |              |                                                               | -2.1084313 down |
| ZNF7         | AK096025     | zinc finger protein 7                                         | -2.479293 down  |
| PTPRN        | NM_002846    | protein tyrosine phosphatase, receptor type, N                | -2.3494031 down |
| RAP1GAP2     | NM_015085    | RAP1 GTPase activating protein 2                              | -2.077722 down  |
| KCNE1        | NM_000219    | potassium voltage-gated channel, Isk-related family, member 1 | -2.353031 down  |
| LRRC9        | XR_110295    | leucine rich repeat containing 9                              | -2.3282945 down |
| GAF1         | AF190748     | FGF2-associated protein GAF1                                  | -3.424499 down  |
| CHSY3        | NM_175856    | chondroitin sulfate synthase 3                                | -2.0585327 down |
| LOC339874    | NR_038976    | uncharacterized LOC339874                                     | -3.359486 down  |

|           |              |                                                          |                 |
|-----------|--------------|----------------------------------------------------------|-----------------|
| C3orf39   | NM_032806    | chromosome 3 open reading frame 39                       | -2.050156 down  |
| IGFL2     | AK125754     | IGF-like family member 2                                 | -2.1914747 down |
|           |              |                                                          | -2.1889653 down |
|           |              |                                                          | -2.1629236 down |
| MSLN      | NM_005823    | mesothelin                                               | -2.3855743 down |
| SYNGAP1   | NM_006772    | synaptic Ras GTPase activating protein 1                 | -2.4489183 down |
| CADPS2    | NM_001167940 | Ca <sup>++</sup> -dependent secretion activator 2        | -2.124017 down  |
| SYNE1     | NM_033071    | spectrin repeat containing, nuclear envelope 1           | -2.3212101 down |
|           |              |                                                          | -3.853116 down  |
|           |              |                                                          | -3.0360734 down |
| DEFB109P1 | NR_024044    | defensin, beta 109, pseudogene 1                         | -2.6331418 down |
| WDR96     | NM_025145    | WD repeat domain 96                                      | -3.6573246 down |
| HSPG2     | NM_005529    | heparan sulfate proteoglycan 2                           | -2.9772706 down |
| USP49     | AJ586139     | ubiquitin specific peptidase 49                          | -2.0703204 down |
| SPSB4     | NM_080862    | splA/ryanodine receptor domain and SOCS box containing 4 | -2.0252662 down |
|           | XR_110582    |                                                          | -2.3271604 down |
| FGD5      | NM_152536    | FYVE, RhoGEF and PH domain containing 5                  | -3.1576493 down |
| SGSM2     | AK124883     | small G protein signaling modulator 2                    | -4.649883 down  |
| HNRNP3    | NR_033868    | heterogeneous nuclear ribonucleoprotein K pseudogene 3   | -2.1605213 down |
|           |              |                                                          | -3.6328452 down |
| LOC388796 | BC012894     | uncharacterized LOC388796                                | -2.437358 down  |
| FLT4      | AB209637     | fms-related tyrosine kinase 4                            | -2.8877766 down |
| RNF216    | AK128551     | ring finger protein 216                                  | -3.6984475 down |
| ESRP1     | NM_017697    | epithelial splicing regulatory protein 1                 | -2.6823573 down |
| VSX1      | DQ854811     | visual system homeobox 1                                 | -3.3461142 down |
| NRG3      | NM_001010848 | neuregulin 3                                             | -2.1122186 down |
| FLJ32742  | AK057304     | uncharacterized locus FLJ32742                           | -2.26879 down   |
| STK16     | NM_001008910 | serine/threonine kinase 16                               | -5.1239147 down |
| ZNF792    | NM_175872    | zinc finger protein 792                                  | -2.0244782 down |
| LINC00410 | NR_027039    | long intergenic non-protein coding RNA 410               | -3.2167509 down |
|           | AK098530     |                                                          | -2.0207627 down |
| CD209     | NM_021155    | CD209 molecule                                           | -4.00072 down   |
|           | AK127178     |                                                          | -3.5016816 down |
| NADKD1    | NM_001085411 | NAD kinase domain containing 1                           | -4.36624 down   |
| FAM22A    | NM_001099338 | family with sequence similarity 22, member A             | -3.300521 down  |
| C9orf68   | NM_001039395 | chromosome 9 open reading frame 68                       | -2.6702895 down |
| RHOV      | NM_133639    | ras homolog gene family, member V                        | -2.0145276 down |
|           | AK309505     |                                                          | -3.4554362 down |
| CRYAB     | NM_001885    | crystallin, alpha B                                      | -2.4514074 down |
| LY6G5C    | NM_025262    | lymphocyte antigen 6 complex, locus G5C                  | -9.029468 down  |
| PSMB11    | NM_001099780 | proteasome (prosome, macropain) subunit, beta type, 11   | -2.034291 down  |

|              |              |                                                                                       |             |      |
|--------------|--------------|---------------------------------------------------------------------------------------|-------------|------|
|              |              |                                                                                       | -3.7783194  | down |
| LOC100240734 | NR_026657    | uncharacterized LOC100240734                                                          | -2.6423094  | down |
| TAF1L        | NM_153809    | TAF1 RNA polymerase II, TATA box binding protein (TBP)-associated factor, 210kDa-like | -5.5881977  | down |
| FAM196A      | NM_001039762 | family with sequence similarity 196, member A                                         | -2.5060225  | down |
|              | AF289570     |                                                                                       | -4.904358   | down |
| C1orf210     | NM_182517    | chromosome 1 open reading frame 210                                                   | -3.2689347  | down |
| KLB          | NM_175737    | klotho beta                                                                           | -2.7674081  | down |
| LINC00273    | NR_038368    | long intergenic non-protein coding RNA 273                                            | -11.5935135 | down |
| LOC348840    | NR_003291    | uncharacterized LOC348840                                                             | -2.1356416  | down |
| TRIM3        | NM_006458    | tripartite motif containing 3                                                         | -2.016826   | down |
| XKR6         | NM_173683    | XK, Kell blood group complex subunit-related family, member 6                         | -2.8963418  | down |
| KALRN        | NM_003947    | kalirin, RhoGEF kinase                                                                | -4.946721   | down |
| C21orf7      | AY033900     | chromosome 21 open reading frame 7                                                    | -3.5229876  | down |
| NEBL         |              | nebulette                                                                             | -2.6540837  | down |
| RPS6KL1      | NM_031464    | ribosomal protein S6 kinase-like 1                                                    | -2.1336749  | down |
| C3orf51      | NR_024615    | chromosome 3 open reading frame 51                                                    | -3.9506292  | down |
| MYLPF        | NM_013292    | myosin light chain, phosphorylatable, fast skeletal muscle                            | -2.8975496  | down |
| BHLHE23      | NM_080606    | basic helix-loop-helix family, member e23                                             | -2.953399   | down |
| MAGEA2B      | NM_153488    | melanoma antigen family A, 2B                                                         | -3.042379   | down |
| GRRP1        | NM_024869    | glycine/arginine rich protein 1                                                       | -2.0276973  | down |
| LOC100130342 | BC114619     | secretoglobin-like pseudogene                                                         | -2.5438118  | down |
| DEFB130      | NM_001037804 | defensin, beta 130                                                                    | -2.711161   | down |
| HSPG2        | NM_005529    | heparan sulfate proteoglycan 2                                                        | -3.7379262  | down |
| NPEPPS       | AK311414     | aminopeptidase puromycin sensitive                                                    | -3.2359207  | down |
| TRPM3        | NM_001007471 | transient receptor potential cation channel, subfamily M, member 3                    | -2.509547   | down |
| CCBP2        | NM_001296    | chemokine binding protein 2                                                           | -2.5091977  | down |
| LRR1Q3       | AK131476     | leucine-rich repeats and IQ motif containing 3                                        | -2.322823   | down |
|              | AK092228     |                                                                                       | -2.1858025  | down |
|              | AK054980     |                                                                                       | -2.2069337  | down |
| MAGEA4       | NM_002362    | melanoma antigen family A, 4                                                          | -2.1924     | down |
| MYOD1        | NM_002478    | myogenic differentiation 1                                                            | -7.1367836  | down |
| RBM10        | AK098115     | RNA binding motif protein 10                                                          | -2.5255873  | down |
| SLC28A1      | NM_201651    | solute carrier family 28 (sodium-coupled nucleoside transporter), member 1            | -2.9468334  | down |
| FLJ25917     | AK098783     | uncharacterized LOC401585                                                             | -4.1608076  | down |
|              |              |                                                                                       | -2.0808046  | down |
| ANKRD30BP2   | NR_026916    | ankyrin repeat domain 30B pseudogene 2                                                | -2.7637517  | down |
| KDM2B        | AB031230     | lysine (K)-specific demethylase 2B                                                    | -2.3524652  | down |
|              |              |                                                                                       | -2.8000383  | down |
|              |              |                                                                                       | -2.2860525  | down |
| UBE2Q2P3     | NR_024474    | ubiquitin-conjugating enzyme E2Q family member 2 pseudogene 3                         | -2.3396132  | down |

|              |              |                                                                                 |                 |
|--------------|--------------|---------------------------------------------------------------------------------|-----------------|
|              | AY927536     |                                                                                 | -2.0427396 down |
| DMRT3        | NM_021240    | doublesex and mab-3 related transcription factor 3                              | -3.0700583 down |
|              | BC032956     |                                                                                 | -3.3692966 down |
| GALP         | NM_033106    | galanin-like peptide                                                            | -2.3076105 down |
| LCE6A        | NM_001128600 | late cornified envelope 6A                                                      | -2.1669328 down |
| KCNJ13       | NM_002242    | potassium inwardly-rectifying channel, subfamily J, member 13                   | -2.1590295 down |
| FBXO44       | NM_001014765 | F-box protein 44                                                                | -3.7377772 down |
| SDK2         | NM_001144952 | sidekick homolog 2 (chicken)                                                    | -2.5141318 down |
| DEFA7P       | AY746432     | defensin, alpha 7 pseudogene                                                    | -2.4262056 down |
|              |              |                                                                                 | -2.526869 down  |
|              |              |                                                                                 | -3.1192315 down |
| LRR3C        | NM_001195545 | leucine rich repeat containing 3C                                               | -2.158264 down  |
| C9orf117     | BC133027     | chromosome 9 open reading frame 117                                             | -3.2173495 down |
| LOC442421    | NR_024496    | uncharacterized LOC442421                                                       | -3.0705323 down |
|              |              |                                                                                 | -2.3721492 down |
| LOC144486    | NR_027035    | uncharacterized LOC144486                                                       | -2.7160625 down |
|              |              |                                                                                 | -2.6186666 down |
| ATRNL1       | NM_207303    | attractin-like 1                                                                | -2.0279331 down |
| KCNK7        | NM_005714    | potassium channel, subfamily K, member 7                                        | -2.4519825 down |
| L3MBTL2      | NM_031488    | l(3)mbt-like 2 (Drosophila)                                                     | -2.4604206 down |
|              |              |                                                                                 | -2.5506198 down |
| C19orf73     | NM_018111    | chromosome 19 open reading frame 73                                             | -2.1735058 down |
|              | CU677870     |                                                                                 | -2.3017318 down |
| UCA1         | NR_015379    | urothelial cancer associated 1 (non-protein coding)                             | -2.8168876 down |
|              |              |                                                                                 | -4.000587 down  |
| AKNA         | NM_030767    | AT-hook transcription factor                                                    | -5.454889 down  |
| ATP4A        | NM_000704    | ATPase, H <sup>+</sup> /K <sup>+</sup> exchanging, alpha polypeptide            | -2.286891 down  |
| LOC100128402 | AK124574     | uncharacterized LOC100128402                                                    | -2.8967838 down |
| NOS1AP       | NM_014697    | nitric oxide synthase 1 (neuronal) adaptor protein                              | -3.179233 down  |
|              | BI056255     |                                                                                 | -2.2621713 down |
| DEFB132      | NM_207469    | defensin, beta 132                                                              | -2.4618776 down |
| SNX31        | NM_152628    | sorting nexin 31                                                                | -2.1604326 down |
| LOC283501    | AK093292     | uncharacterized LOC283501                                                       | -3.187564 down  |
| SEMA6B       | NM_032108    | sema domain, transmembrane domain (TM), and cytoplasmic domain, (semaphorin) 6B | -2.0456653 down |
| PTCHD2       | NM_020780    | patched domain containing 2                                                     | -2.1074114 down |
|              |              |                                                                                 | -5.123204 down  |
| ESPNL        | NM_194312    | espin-like                                                                      | -2.7577095 down |
| PTPRF        | BC048416     | protein tyrosine phosphatase, receptor type, F                                  | -6.87335 down   |
| SPRR2A       | NM_005988    | small proline-rich protein 2A                                                   | -3.136551 down  |
| ZNF550       | NM_001039654 | zinc finger protein 550                                                         | -2.3173168 down |

|              |              |                                                                                                     |                 |
|--------------|--------------|-----------------------------------------------------------------------------------------------------|-----------------|
| HYALP1       | NR_002731    | hyaluronoglucosaminidase pseudogene 1                                                               | -4.87453 down   |
| MUC16        | NM_024690    | mucin 16, cell surface associated                                                                   | -2.1008573 down |
| PASD1        | NM_173493    | PAS domain containing 1                                                                             | -3.107486 down  |
|              | AF289601     |                                                                                                     | -2.6873312 down |
|              |              |                                                                                                     | -2.1281114 down |
| DUOXA1       | NM_144565    | dual oxidase maturation factor 1                                                                    | -2.868307 down  |
|              | AK096239     |                                                                                                     | -2.659365 down  |
|              | AK310283     |                                                                                                     | -2.2905316 down |
| ANKRD20A5P   | BC022023     | ankyrin repeat domain 20 family, member A5, pseudogene                                              | -3.3703258 down |
| GOLGA6L6     | NM_001145004 | golgin A6 family-like 6                                                                             | -2.0424128 down |
|              | AK131548     |                                                                                                     | -2.9386191 down |
|              |              |                                                                                                     | -2.3039758 down |
|              | BU659163     |                                                                                                     | -2.7154207 down |
|              | XM_001717762 |                                                                                                     | -2.004759 down  |
| KCNQ2        | NM_004518    | potassium voltage-gated channel, KQT-like subfamily, member 2                                       | -2.6802337 down |
|              |              |                                                                                                     | -4.353743 down  |
| OR56A4       | NM_001005179 | olfactory receptor, family 56, subfamily A, member 4                                                | -3.442417 down  |
| COL9A1       | NM_001851    | collagen, type IX, alpha 1                                                                          | -2.5184052 down |
| MYCBPAP      | NM_032133    | MYCBP associated protein                                                                            | -2.5466025 down |
| KCNV2        | NM_133497    | potassium channel, subfamily V, member 2                                                            | -3.276973 down  |
| PRAMEF3      | NM_001013692 | PRAME family member 3                                                                               | -2.3842094 down |
| ARHGAP36     | NM_144967    | Rho GTPase activating protein 36                                                                    | -2.4338784 down |
| MYCL1        | NM_005376    | v-myc myelocytomatosis viral oncogene homolog 1, lung carcinoma derived (avian)                     | -2.5123694 down |
| POU5F1       | NM_002701    | POU class 5 homeobox 1                                                                              | -2.5848484 down |
| IPO7         | NM_006391    | importin 7                                                                                          | -2.1834571 down |
| NYNRIN       | NM_025081    | NYN domain and retroviral integrase containing                                                      | -2.4519982 down |
|              |              | proteoglycan 2, bone marrow (natural killer cell activator, eosinophil granule major basic protein) |                 |
| PRG2         | NM_002728    |                                                                                                     | -2.9523873 down |
| LOC100132071 | AK128253     | uncharacterized LOC100132071                                                                        | -2.3124185 down |
| FLJ37786     | XR_108343    | uncharacterized LOC642691                                                                           | -4.214188 down  |
| FLJ43903     | AK125891     | uncharacterized LOC401471                                                                           | -17.184885 down |
|              |              |                                                                                                     | -4.050142 down  |
| OR2Y1        | NM_001001657 | olfactory receptor, family 2, subfamily Y, member 1                                                 | -2.3281872 down |
|              |              |                                                                                                     | -4.3974977 down |
| TLX1         | NM_005521    | T-cell leukemia homeobox 1                                                                          | -2.0746644 down |
| SLC30A3      | NM_003459    | solute carrier family 30 (zinc transporter), member 3                                               | -3.165658 down  |
| BDNF-AS1     | NR_002832    | BDNF antisense RNA 1 (non-protein coding)                                                           | -3.3081436 down |
| CDH18        | NM_004934    | cadherin 18, type 2                                                                                 | -3.1158633 down |
| SGCD         | NM_000337    | sarcoglycan, delta (35kDa dystrophin-associated glycoprotein)                                       | -5.716335 down  |
| ABCB11       | NM_003742    | ATP-binding cassette, sub-family B (MDR/TAP), member 11                                             | -2.027744 down  |
| FAM71F1      | NM_032599    | family with sequence similarity 71, member F1                                                       | -2.8818603 down |

|              |              |                                                                       |                 |
|--------------|--------------|-----------------------------------------------------------------------|-----------------|
| SZT2         | AK131107     | seizure threshold 2 homolog (mouse)                                   | -2.162768 down  |
| PRDM15       | NM_022115    | PR domain containing 15                                               | -2.5705073 down |
| LOC439990    | NR_038464    | uncharacterized LOC439990                                             | -2.0570042 down |
| C8orf80      | NM_001010906 | chromosome 8 open reading frame 80                                    | -2.86587 down   |
| CYP24A1      | NM_000782    | cytochrome P450, family 24, subfamily A, polypeptide 1                | -2.2484956 down |
| MUM1         | NM_032853    | melanoma associated antigen (mutated) 1                               | -2.1086583 down |
|              |              |                                                                       | -2.3870096 down |
| CLIP2        | NM_003388    | CAP-GLY domain containing linker protein 2                            | -2.791784 down  |
| PRIC285      | NM_001037335 | peroxisomal proliferator-activated receptor A interacting complex 285 | -6.1510987 down |
|              |              |                                                                       | -3.532509 down  |
|              |              |                                                                       | -3.6665282 down |
| SYNDIG1L     | NM_001105579 | synapse differentiation inducing 1-like                               | -4.2930007 down |
| VSX1         | NM_014588    | visual system homeobox 1                                              | -2.0050478 down |
| CECR2        | AF411609     | cat eye syndrome chromosome region, candidate 2                       | -4.5544186 down |
| CCIN         | NM_005893    | calicin                                                               | -3.3939779 down |
| LOC286154    | AK096739     | uncharacterized LOC286154                                             | -2.5067275 down |
| LOC100128361 | NR_036505    | uncharacterized LOC100128361                                          | -2.050467 down  |
|              | AK172763     |                                                                       | -3.33453 down   |
|              |              |                                                                       | -2.059746 down  |
| RBM14        | AB209007     | RNA binding motif protein 14                                          | -2.191927 down  |
| ALG1L2       | NM_001136152 | asparagine-linked glycosylation 1-like 2                              | -2.4297338 down |
| SRPX2        | NM_014467    | sushi-repeat containing protein, X-linked 2                           | -2.1659663 down |
| TRIM43       | NM_138800    | tripartite motif containing 43                                        | -2.4103746 down |
| LOC147646    | NM_001193623 | uncharacterized LOC147646                                             | -4.1407604 down |
| POM121L10P   | NR_024593    | POM121 membrane glycoprotein-like 10, pseudogene                      | -2.423049 down  |
|              |              |                                                                       | -4.5689235 down |
| CPNE7        | NM_014427    | copine VII                                                            | -2.0932019 down |
| OR4F6        | NM_001005326 | olfactory receptor, family 4, subfamily F, member 6                   | -2.498925 down  |
|              |              |                                                                       | -2.6798487 down |
| LOC283738    | NR_038229    | uncharacterized LOC283738                                             | -3.1906116 down |
| HIP1R        | AK090537     | huntingtin interacting protein 1 related                              | -3.9575086 down |
| LOC283270    | AK091052     | uncharacterized LOC283270                                             | -6.2427974 down |
| C6orf226     | NM_001008739 | chromosome 6 open reading frame 226                                   | -2.0317554 down |
|              |              |                                                                       | -3.0007043 down |
| GRIK2        | NM_001166247 | glutamate receptor, ionotropic, kainate 2                             | -3.7389605 down |
| PRB1         | NM_005039    | proline-rich protein BstNI subfamily 1                                | -2.585292 down  |
| ADAMDEC1     | NM_001145271 | ADAM-like, decysin 1                                                  | -2.8370197 down |
|              |              |                                                                       | -4.2263117 down |
| RNF157       | NM_052916    | ring finger protein 157                                               | -5.696053 down  |
| MAPKBP1      | NM_014994    | mitogen-activated protein kinase binding protein 1                    | -2.318445 down  |
| PER3         | NM_016831    | period homolog 3 (Drosophila)                                         | -2.7912817 down |



|              |              |                                                                                                                              |                 |
|--------------|--------------|------------------------------------------------------------------------------------------------------------------------------|-----------------|
| C10orf129    | NM_207321    | chromosome 10 open reading frame 129                                                                                         | -3.9808633 down |
|              |              |                                                                                                                              | -2.2515256 down |
| CDV3         | NM_017548    | CDV3 homolog (mouse)                                                                                                         | -2.1465824 down |
| POM121L1P    | NR_024591    | POM121 membrane glycoprotein-like 1, pseudogene                                                                              | -2.0600715 down |
|              |              |                                                                                                                              | -4.2592173 down |
| OR2G3        | NM_001001914 | olfactory receptor, family 2, subfamily G, member 3                                                                          | -2.050878 down  |
| SYT8         | NM_138567    | synaptotagmin VIII                                                                                                           | -2.3531735 down |
| OR7E37P      | NR_002163    | olfactory receptor, family 7, subfamily E, member 37 pseudogene                                                              | -5.2708173 down |
| LOC100130741 | AK127222     | uncharacterized LOC100130741                                                                                                 | -3.072275 down  |
| ALDH1L1      | NM_012190    | aldehyde dehydrogenase 1 family, member L1                                                                                   | -2.478089 down  |
| FAM64A       | NM_001195228 | family with sequence similarity 64, member A                                                                                 | -4.513279 down  |
| LOC100130285 | XR_109235    | uncharacterized LOC100130285                                                                                                 | -3.3794758 down |
| GUCA1B       | NM_002098    | guanylate cyclase activator 1B (retina)                                                                                      | -2.0673616 down |
| CHRNA3       | NM_005199    | cholinergic receptor, nicotinic, gamma<br>sema domain, transmembrane domain (TM), and cytoplasmic domain,<br>(semaphorin) 6C | -4.1138744 down |
| SEMA6C       | NM_001178061 |                                                                                                                              | -3.451388 down  |
| GOLGA8E      | NR_033350    | golgin A8 family, member E                                                                                                   | -2.189271 down  |
| SUSD4        |              | sushi domain containing 4                                                                                                    | -2.1846018 down |
| NALCN        | AK094390     | sodium leak channel, non-selective                                                                                           | -3.0156343 down |
| C12orf50     | NM_152589    | chromosome 12 open reading frame 50                                                                                          | -3.3261697 down |
| LRRC52       | NM_001005214 | leucine rich repeat containing 52                                                                                            | -2.5712633 down |
|              |              |                                                                                                                              | -3.2312324 down |
| EBF4         | NM_001110514 | early B-cell factor 4                                                                                                        | -2.5946763 down |
| GJB7         |              | gap junction protein, beta 7, 25kDa                                                                                          | -2.0394537 down |
| XAGE-4       | XR_109760    | XAGE-4 protein                                                                                                               | -2.3084831 down |
|              |              |                                                                                                                              | -2.8844619 down |
| LOC284412    | NR_029390    | uncharacterized LOC284412                                                                                                    | -2.5562716 down |
|              | DA613845     |                                                                                                                              | -3.3073323 down |
| OR11H6       | NM_001004480 | olfactory receptor, family 11, subfamily H, member 6                                                                         | -2.2350492 down |
| LOC120824    | NM_001206625 | tripartite motif-containing protein ENSP00000309378-like                                                                     | -2.4483905 down |
| DQX1         | NM_133637    | DEAQ box RNA-dependent ATPase 1                                                                                              | -2.619572 down  |
| GLP2R        | NM_004246    | glucagon-like peptide 2 receptor                                                                                             | -2.654922 down  |
| AMMECR1      | NM_001171689 | Alport syndrome, mental retardation, midface hypoplasia and elliptocytosis<br>chromosomal region gene 1                      | -3.9276004 down |
| LLGL2        | NM_001015002 | lethal giant larvae homolog 2 (Drosophila)                                                                                   | -2.3091593 down |
| KIAA0087     | NR_022006    | KIAA0087                                                                                                                     | -7.228069 down  |
| LOC100131581 | AK092544     | uncharacterized LOC100131581                                                                                                 | -2.8613105 down |
| DRGX         | NM_001080520 | dorsal root ganglia homeobox                                                                                                 | -2.0302548 down |
| KRTAP12-2    | NM_181684    | keratin associated protein 12-2                                                                                              | -2.7637467 down |
| SLC34A2      | NM_006424    | solute carrier family 34 (sodium phosphate), member 2                                                                        | -2.3184993 down |
|              |              |                                                                                                                              | -2.6399198 down |
|              |              |                                                                                                                              | -2.5514452 down |

|              |              |                                                                               |            |      |
|--------------|--------------|-------------------------------------------------------------------------------|------------|------|
|              | XR_109635    |                                                                               | -2.7173836 | down |
|              | AB529268     |                                                                               | -2.2521598 | down |
| ARHGEF1      | AK090448     | Rho guanine nucleotide exchange factor (GEF) 1                                | -2.1621234 | down |
| RARRES1      | NM_002888    | retinoic acid receptor responder (tazarotene induced) 1                       | -2.3380191 | down |
| PTH1R        | NM_000316    | parathyroid hormone 1 receptor                                                | -2.3096282 | down |
|              |              |                                                                               | -2.1962855 | down |
|              | BC028053     |                                                                               | -3.2160168 | down |
| GRM7         | NM_181874    | glutamate receptor, metabotropic 7                                            | -3.1569126 | down |
| MYH14        | NM_001077186 | myosin, heavy chain 14, non-muscle                                            | -3.9846447 | down |
| ZNF621       | NM_198484    | zinc finger protein 621                                                       | -3.3787754 | down |
| SNAR-C3      | BF570763     | small ILF3/NF90-associated RNA C3                                             | -5.299424  | down |
| SPATA13      | NM_001166271 | spermatogenesis associated 13                                                 | -2.9004962 | down |
|              |              |                                                                               | -4.396531  | down |
| WDR64        | NM_144625    | WD repeat domain 64                                                           | -3.1141214 | down |
| SSTR4        | NM_001052    | somatostatin receptor 4                                                       | -2.2098005 | down |
| CHRM2        | NM_001006630 | cholinergic receptor, muscarinic 2                                            | -2.6866453 | down |
| WFIKKN2      | NM_175575    | WAP, follistatin/kazal, immunoglobulin, kunitz and netrin domain containing 2 | -4.5092516 | down |
|              |              |                                                                               | -2.4341285 | down |
| SLC22A24     | NM_001136506 | solute carrier family 22, member 24                                           | -2.6459508 | down |
| C17orf104    | BC035159     | chromosome 17 open reading frame 104                                          | -2.8974319 | down |
| SUSD2        | NM_019601    | sushi domain containing 2                                                     | -2.9208345 | down |
| AKAP12       | NM_144497    | A kinase (PRKA) anchor protein 12                                             | -2.039172  | down |
|              | BX090553     |                                                                               | -2.4411469 | down |
| CEACAM7      | NM_006890    | carcinoembryonic antigen-related cell adhesion molecule 7                     | -2.2503421 | down |
| DUSP18       | NM_152511    | dual specificity phosphatase 18                                               | -2.2181687 | down |
|              |              |                                                                               | -2.8659291 | down |
| LOC100130557 | NR_024567    | uncharacterized LOC100130557                                                  | -2.0409    | down |
| CXCL14       | NM_004887    | chemokine (C-X-C motif) ligand 14                                             | -2.5581894 | down |
|              |              |                                                                               | -2.7704477 | down |
| MEGF8        | NM_001410    | multiple EGF-like-domains 8                                                   | -3.1479897 | down |
| EXD1         | NM_152596    | exonuclease 3'-5' domain containing 1                                         | -4.3647523 | down |
|              |              |                                                                               | -2.8587263 | down |
| MAML3        | NM_018717    | mastermind-like 3 (Drosophila)                                                | -15.053548 | down |
| LAMA4        | NM_001105207 | laminin, alpha 4                                                              | -4.858686  | down |
| FIGN         |              | fidgetin                                                                      | -2.472739  | down |
| FLJ13773     | AK023835     | FLJ13773                                                                      | -2.103998  | down |
| NLGN2        | NM_020795    | neuroligin 2                                                                  | -2.5072322 | down |
|              | BC043411     |                                                                               | -2.7703223 | down |
| MUC6         | AK092533     | mucin 6, oligomeric mucus/gel-forming                                         | -2.2798593 | down |
| STH          | NM_001007532 | saitohin                                                                      | -4.316842  | down |

|           |              |                                                                                                       |                 |
|-----------|--------------|-------------------------------------------------------------------------------------------------------|-----------------|
|           | AK127966     |                                                                                                       | -2.099907 down  |
|           |              |                                                                                                       | -2.496098 down  |
| HAAO      |              | 3-hydroxyanthranilate 3,4-dioxygenase                                                                 | -5.9729013 down |
| DLX6-AS1  | NR_015448    | DLX6 antisense RNA 1 (non-protein coding)                                                             | -2.107493 down  |
| ZNF208    | NM_007153    | zinc finger protein 208                                                                               | -2.3921297 down |
|           | AF068294     |                                                                                                       | -4.3153763 down |
| PLA2G1B   | NM_000928    | phospholipase A2, group IB (pancreas)                                                                 | -3.544727 down  |
| GNAL      | NM_002071    | guanine nucleotide binding protein (G protein), alpha activating activity polypeptide, olfactory type | -2.8628473 down |
| PPP6R2    | AK024148     | protein phosphatase 6, regulatory subunit 2                                                           | -5.953941 down  |
| UGT2B7    | NM_001074    | UDP glucuronosyltransferase 2 family, polypeptide B7                                                  | -4.2031784 down |
| DBX1      | NM_001029865 | developing brain homeobox 1                                                                           | -2.674685 down  |
| BUB1B     | NM_001211    | budding uninhibited by benzimidazoles 1 homolog beta (yeast)                                          | -4.010965 down  |
| KCNK9     | NM_016601    | potassium channel, subfamily K, member 9                                                              | -3.212436 down  |
| ATP1B2    | NM_001678    | ATPase, Na <sup>+</sup> /K <sup>+</sup> transporting, beta 2 polypeptide                              | -2.2162814 down |
| DDB1      |              | damage-specific DNA binding protein 1, 127kDa                                                         | -2.6218011 down |
| LZTS1     | NM_021020    | leucine zipper, putative tumor suppressor 1                                                           | -2.11839 down   |
| HN1L      | NM_144570    | hematological and neurological expressed 1-like                                                       | -3.0376556 down |
| TEF       | NM_003216    | thyrotrophic embryonic factor                                                                         | -2.6184251 down |
|           |              |                                                                                                       | -3.8491814 down |
| IMP5      | NM_175882    | intramembrane protease 5                                                                              | -3.3487146 down |
| CLEC6A    | NM_001007033 | C-type lectin domain family 6, member A                                                               | -3.0251372 down |
| PHKA1     | NM_002637    | phosphorylase kinase, alpha 1 (muscle)                                                                | -2.113557 down  |
| GAK       | AK131464     | cyclin G associated kinase                                                                            | -2.2029355 down |
| C12orf48  | NM_017915    | chromosome 12 open reading frame 48                                                                   | -7.67942 down   |
| TRIM61    | NM_001012414 | tripartite motif containing 61                                                                        | -2.1925528 down |
|           |              |                                                                                                       | -2.2568557 down |
| LMX1B     | NM_002316    | LIM homeobox transcription factor 1, beta                                                             | -2.5086687 down |
| PRM2      | NM_002762    | protamine 2                                                                                           | -2.4658096 down |
| PNMA6C    | NM_001170944 | paraneoplastic antigen like 6C                                                                        | -2.9828613 down |
| FSIP2     | NM_173651    | fibrous sheath interacting protein 2                                                                  | -2.5490985 down |
|           | DB453801     |                                                                                                       | -2.191657 down  |
| PFKFB3    | NM_004566    | 6-phosphofructo-2-kinase/fructose-2,6-biphosphatase 3                                                 | -2.1264164 down |
|           |              |                                                                                                       | -2.3124542 down |
| LOC729032 | XR_132715    | ribosomal protein L36 pseudogene                                                                      | -2.1807523 down |
| TWIST1    | NM_000474    | twist homolog 1 (Drosophila)                                                                          | -2.3576634 down |
| CELA3A    | NM_005747    | chymotrypsin-like elastase family, member 3A                                                          | -2.2357085 down |
| TCEB3C    | NM_145653    | transcription elongation factor B polypeptide 3C (elongin A3)                                         | -8.311952 down  |
| NRG2      | AK124504     | neuregulin 2                                                                                          | -2.7202995 down |
| C6orf201  | NM_001085401 | chromosome 6 open reading frame 201                                                                   | -2.1229281 down |
| ADAMTSL1  | NM_052866    | ADAMTS-like 1                                                                                         | -2.3660681 down |

|              |              |                                                                   |            |      |
|--------------|--------------|-------------------------------------------------------------------|------------|------|
|              |              |                                                                   | -2.5416183 | down |
| CIDEA        | NM_001279    | cell death-inducing DFFA-like effector a                          | -5.287442  | down |
| CHD5         | NM_015557    | chromodomain helicase DNA binding protein 5                       | -2.7657988 | down |
| KRTAP10-4    | NM_198687    | keratin associated protein 10-4                                   | -4.6243157 | down |
|              |              |                                                                   | -2.7799406 | down |
| KIF1C        | NM_006612    | kinesin family member 1C                                          | -2.0738742 | down |
| LMOD2        | NM_207163    | leiomodrin 2 (cardiac)                                            | -2.570554  | down |
| C19orf20     | NM_033513    | chromosome 19 open reading frame 20                               | -2.420084  | down |
| NPL          | BC034966     | N-acetylneuraminate pyruvate lyase (dihydrodipicolinate synthase) | -2.38428   | down |
| ZNF783       | AK303492     | zinc finger family member 783                                     | -3.6931887 | down |
| C17orf69     | NR_026906    | chromosome 17 open reading frame 69                               | -2.249554  | down |
| OVOL2        | NM_021220    | ovo-like 2 (Drosophila)                                           | -3.4602869 | down |
| CXorf1       | NM_004709    | chromosome X open reading frame 1                                 | -2.5168185 | down |
|              |              |                                                                   | -3.6310387 | down |
| DEFB136      | NM_001033018 | defensin, beta 136                                                | -2.5463066 | down |
| GDPD5        | NM_030792    | glycerophosphodiester phosphodiesterase domain containing 5       | -2.1044037 | down |
| CDRT8        | A1150443     | CMT1A duplicated region transcript 8                              | -3.3121119 | down |
| SH3PXD2B     | NM_001017995 | SH3 and PX domains 2B                                             | -2.0006588 | down |
| ALOX12P2     | NR_002710    | arachidonate 12-lipoxygenase pseudogene 2                         | -3.0843325 | down |
| NCR1         | NM_004829    | natural cytotoxicity triggering receptor 1                        | -2.14373   | down |
|              | BG722090     |                                                                   | -2.2055364 | down |
| MRP63        | NM_024026    | mitochondrial ribosomal protein 63                                | -2.5852232 | down |
| LOC100190939 | NR_024458    | uncharacterized LOC100190939                                      | -2.055494  | down |
| NTF4         | NM_006179    | neurotrophin 4                                                    | -2.2685297 | down |
| FADS6        | NM_178128    | fatty acid desaturase domain family, member 6                     | -5.106219  | down |
|              |              |                                                                   | -2.7674096 | down |
|              |              |                                                                   | -2.5182302 | down |
|              | AK074630     |                                                                   | -3.5783901 | down |
| ZBTB12       | NM_181842    | zinc finger and BTB domain containing 12                          | -2.2155778 | down |
| CRYBB2P1     | NR_033733    | crystallin, beta B2 pseudogene 1                                  | -2.578034  | down |
| AGMO         | NM_001004320 | alkylglycerol monooxygenase                                       | -2.9283755 | down |
| SLC13A4      | NM_012450    | solute carrier family 13 (sodium/sulfate symporters), member 4    | -2.5506876 | down |
| BRSK1        | NM_032430    | BR serine/threonine kinase 1                                      | -3.3366559 | down |
|              | CU677925     |                                                                   | -2.1556482 | down |
| NPW          | NM_001099456 | neuropeptide W                                                    | -2.8928888 | down |
| CLCN5        | NM_001127899 | chloride channel 5                                                | -3.778924  | down |
| PKD1         | NM_001009944 | polycystic kidney disease 1 (autosomal dominant)                  | -2.2537096 | down |
| LMX1A        | NM_177398    | LIM homeobox transcription factor 1, alpha                        | -2.7074177 | down |
| GJA5         | NM_005266    | gap junction protein, alpha 5, 40kDa                              | -2.4397182 | down |
| TNNI3        | NM_000363    | troponin I type 3 (cardiac)                                       | -2.0047987 | down |
|              |              |                                                                   | -3.1679533 | down |

|              |              |                                                                                         |            |      |
|--------------|--------------|-----------------------------------------------------------------------------------------|------------|------|
| LOC151760    | XR_108461    | uncharacterized LOC151760                                                               | -2.2375312 | down |
| GNAO1        | NM_138736    | guanine nucleotide binding protein (G protein), alpha activating activity polypeptide O | -2.0468462 | down |
| OR4F4        | NM_001004195 | olfactory receptor, family 4, subfamily F, member 4                                     | -2.2719133 | down |
| STOX2        | NM_020225    | storkhead box 2                                                                         | -2.6534352 | down |
| C15orf55     | NM_175741    | chromosome 15 open reading frame 55                                                     | -3.0860043 | down |
| LOC100130071 | XR_109863    | GSQS6193                                                                                | -2.1335576 | down |
| VSIG2        | NM_014312    | V-set and immunoglobulin domain containing 2                                            | -2.8821256 | down |
| PLA2R1       | NM_007366    | phospholipase A2 receptor 1, 180kDa                                                     | -2.0699399 | down |
| LRP11        |              | low density lipoprotein receptor-related protein 11                                     | -2.8726544 | down |
|              |              |                                                                                         | -3.8446653 | down |
| DNAAF2       | NM_001083908 | dynein, axonemal, assembly factor 2                                                     | -2.1570506 | down |
| LOC100287225 | NR_040075    | uncharacterized LOC100287225                                                            | -2.439124  | down |
| GVINP1       | NR_003945    | GTPase, very large interferon inducible pseudogene 1                                    | -2.1592197 | down |
| HOMER1       |              | homer homolog 1 (Drosophila)                                                            | -3.095869  | down |
| ROBO2        | NM_002942    | roundabout, axon guidance receptor, homolog 2 (Drosophila)                              | -4.242307  | down |
| PALM         | NM_002579    | paralemmin                                                                              | -2.1597066 | down |
| LOC100131792 | AK093561     | uncharacterized LOC100131792                                                            | -2.9254284 | down |
| TPRXL        | NR_002223    | tetra-peptide repeat homeobox-like                                                      | -2.2759128 | down |
|              | XR_132758    |                                                                                         | -3.2619371 | down |
| GLI2         | NM_005270    | GLI family zinc finger 2                                                                | -2.0886974 | down |
| TGM7         | NM_052955    | transglutaminase 7                                                                      | -2.6584141 | down |
| ZNF749       | NM_001023561 | zinc finger protein 749                                                                 | -2.2963426 | down |
| FGF7         | NM_002009    | fibroblast growth factor 7                                                              | -3.1798081 | down |
| LOC100129518 | NR_037166    | uncharacterized LOC100129518                                                            | -3.0518596 | down |
| VWA5B2       | NM_138345    | von Willebrand factor A domain containing 5B2                                           | -2.3341541 | down |
|              |              |                                                                                         | -2.6388333 | down |
|              | DB229023     |                                                                                         | -2.2753153 | down |
| MUC22        | NM_001198815 | mucin 22                                                                                | -2.1166081 | down |
| NAG20        | XR_108823    | NAG20                                                                                   | -10.061569 | down |
| C21orf104    | AJ011409     | chromosome 21 open reading frame 104                                                    | -3.939667  | down |
| ASB18        | NM_212556    | ankyrin repeat and SOCS box containing 18                                               | -2.563251  | down |
|              | AK129565     |                                                                                         | -4.287017  | down |
| MPP2         | NM_005374    | membrane protein, palmitoylated 2 (MAGUK p55 subfamily member 2)                        | -2.9756818 | down |
| SOX10        | NM_006941    | SRY (sex determining region Y)-box 10                                                   | -2.019094  | down |
| LACTBL1      | XM_002342035 | lactamase, beta-like 1                                                                  | -2.4899201 | down |
| FLJ46361     | NR_003570    | deleted in malignant brain tumors 1 pseudogene                                          | -2.379761  | down |
| LOC650293    | NM_001040071 | seven transmembrane helix receptor                                                      | -3.1572661 | down |
| ACSS3        | NM_024560    | acyl-CoA synthetase short-chain family member 3                                         | -2.8812094 | down |
|              | AF384996     |                                                                                         | -3.1008523 | down |
| P4HA2        | NM_001017973 | prolyl 4-hydroxylase, alpha polypeptide II                                              | -2.0589087 | down |

|              |              |                                                                               |                  |
|--------------|--------------|-------------------------------------------------------------------------------|------------------|
|              | AK128101     |                                                                               | -3.4896889 down  |
| VIPR2        | NM_003382    | vasoactive intestinal peptide receptor 2                                      | -2.1175394 down  |
| RHBDL2       | NM_017821    | rhomboid, veinlet-like 2 (Drosophila)                                         | -2.0552807 down  |
| OR1S2        | NM_001004459 | olfactory receptor, family 1, subfamily S, member 2                           | -2.427515 down   |
| SGK110       | NM_001199824 | putative uncharacterized serine/threonine-protein kinase Sgk110-like          | -2.0057232 down  |
| BCL2L10      | NM_020396    | BCL2-like 10 (apoptosis facilitator)                                          | -5.0572643 down  |
| LINC00235    | NR_024121    | long intergenic non-protein coding RNA 235                                    | -2.086108 down   |
|              | X57818       |                                                                               | -3.4062817 down  |
| LOC100128498 | AK126742     | uncharacterized LOC100128498                                                  | -2.821145 down   |
| FAM132B      | XM_003119882 | family with sequence similarity 132, member B                                 | -3.4506288 down  |
| HORMAD2      | NM_152510    | HORMA domain containing 2                                                     | -3.3447893 down  |
| RBM33        | NM_053043    | RNA binding motif protein 33                                                  | -2.5258825 down  |
|              |              |                                                                               | -3.0081782 down  |
| CDX1         | NM_001804    | caudal type homeobox 1                                                        | -2.900254 down   |
|              |              |                                                                               | -3.316415 down   |
| TXLNB        |              | taxilin beta                                                                  | -2.9084172 down  |
| TDRD6        | NM_001010870 | tudor domain containing 6                                                     | -2.0006807 down  |
| LINC00163    | NR_033840    | long intergenic non-protein coding RNA 163                                    | -2.4099782 down  |
| GLT25D2      | NM_015101    | glycosyltransferase 25 domain containing 2                                    | -2.9312768 down  |
| LOC440330    | BC004968     | uncharacterized LOC440330                                                     | -14.663246 down  |
| CATSPER2     |              | cation channel, sperm associated 2                                            | -5.412927 down   |
| FAM9B        | NM_205849    | family with sequence similarity 9, member B                                   | -2.0680704 down  |
| PHKG1        | NM_006213    | phosphorylase kinase, gamma 1 (muscle)                                        | -3.820593 down   |
| VSX1         | NM_199425    | visual system homeobox 1                                                      | -2.3420432 down  |
|              | BC015443     |                                                                               | -3.1130645 down  |
| SYPL2        | NM_001040709 | synaptophysin-like 2                                                          | -5.0311785 down  |
| PTPRC        | NM_002838    | protein tyrosine phosphatase, receptor type, C                                | -2.4676294 down  |
| PVRL4        | NM_030916    | poliovirus receptor-related 4                                                 | -2.3491104 down  |
|              |              |                                                                               | -3.6696165 down  |
|              |              |                                                                               | -3.500627 down   |
| SPRR2D       | NM_006945    | small proline-rich protein 2D                                                 | -2.2251267 down  |
| FLJ13224     | NR_026806    | uncharacterized LOC79857                                                      | -3.3484845 down  |
| SPATA12      | NM_181727    | spermatogenesis associated 12                                                 | -2.4145296 down  |
| CELSR1       | NM_014246    | cadherin, EGF LAG seven-pass G-type receptor 1 (flamingo homolog, Drosophila) | -2.0354974 down  |
| GRIP1        | NM_021150    | glutamate receptor interacting protein 1                                      | -3.6491559 down  |
| FGF3         | NM_005247    | fibroblast growth factor 3                                                    | -13.7881565 down |
| BCL2         | NM_000657    | B-cell CLL/lymphoma 2                                                         | -2.037091 down   |
| ADCY1        | NM_021116    | adenylate cyclase 1 (brain)                                                   | -3.6959312 down  |
| MRPS16       | NM_016065    | mitochondrial ribosomal protein S16                                           | -2.248775 down   |
| GPR113       | NM_153835    | G protein-coupled receptor 113                                                | -2.231668 down   |

|              |              |                                                                                 |                 |
|--------------|--------------|---------------------------------------------------------------------------------|-----------------|
|              |              |                                                                                 | -2.9753563 down |
| CSNK1E       | NM_152221    | casein kinase 1, epsilon                                                        | -2.6681604 down |
| CPN2         | NM_001080513 | carboxypeptidase N, polypeptide 2                                               | -3.211302 down  |
|              |              |                                                                                 | -3.5383708 down |
| HOXA7        | NM_006896    | homeobox A7                                                                     | -3.1903841 down |
| FAM48B1      | NM_001136234 | family with sequence similarity 48, member B1                                   | -4.0409393 down |
| DNAL4        |              | dynein, axonemal, light chain 4                                                 | -4.13544 down   |
| NBR2         | NR_003108    | neighbor of BRCA1 gene 2 (non-protein coding)                                   | -2.2720811 down |
| ELAVL4       | NM_021952    | ELAV (embryonic lethal, abnormal vision, Drosophila)-like 4 (Hu antigen D)      | -2.26844 down   |
|              |              |                                                                                 | -2.275369 down  |
| RGS21        | NM_001039152 | regulator of G-protein signaling 21                                             | -3.2906437 down |
| EML2         | NM_012155    | echinoderm microtubule associated protein like 2                                | -2.432665 down  |
| LOC100272216 | NR_027439    | uncharacterized LOC100272216                                                    | -3.7766654 down |
|              |              |                                                                                 | -2.5882592 down |
| PPAPDC1A     | NM_001030059 | phosphatidic acid phosphatase type 2 domain containing 1A                       | -2.0184798 down |
| MYL10        | NM_138403    | myosin, light chain 10, regulatory                                              | -2.9560215 down |
| DPM3         | NM_018973    | dolichyl-phosphate mannosyltransferase polypeptide 3                            | -2.4301288 down |
| SYTL5        | NM_138780    | synaptotagmin-like 5                                                            | -2.0588367 down |
| AWAT2        | NM_001002254 | acyl-CoA wax alcohol acyltransferase 2                                          | -2.237796 down  |
|              |              |                                                                                 | -6.600277 down  |
| ANP32A-IT1   | NR_026808    | ANP32A intronic transcript 1 (non-protein coding)                               | -2.7897952 down |
| DST          | NM_001723    | dystonin                                                                        | -3.4785645 down |
| TP53INP1     | NM_033285    | tumor protein p53 inducible nuclear protein 1                                   | -2.3441136 down |
| LOC100128531 | NR_038941    | uncharacterized LOC100128531                                                    | -3.5386827 down |
|              |              |                                                                                 | -2.1866016 down |
|              | S60780       |                                                                                 | -2.0055678 down |
| HOPX         | NM_001145460 | HOP homeobox                                                                    | -2.0832694 down |
| CBLN4        | NM_080617    | cerebellin 4 precursor                                                          | -3.8885832 down |
| CFHR4        | NM_006684    | complement factor H-related 4                                                   | -2.4945016 down |
| KIAA1486     | NM_020864    | KIAA1486                                                                        | -2.1306896 down |
|              | AK094885     |                                                                                 | -2.02908 down   |
|              |              | solute carrier family 13 (sodium-dependent dicarboxylate transporter), member 3 |                 |
| SLC13A3      | NM_001193339 |                                                                                 | -2.5012276 down |
| CNTN4        | NM_175613    | contactin 4                                                                     | -2.3370209 down |
| LOC84856     | NR_026827    | uncharacterized LOC84856                                                        | -2.203354 down  |
| LRRC71       | NM_144702    | leucine rich repeat containing 71                                               | -2.2184744 down |
| C1orf101     | NM_173807    | chromosome 1 open reading frame 101                                             | -2.1297073 down |
|              |              |                                                                                 | -2.8130136 down |
| RFPL3-AS1    | NR_001450    | RFPL3 antisense RNA 1 (non-protein coding)                                      | -2.4599001 down |
| PYY          | NM_004160    | peptide YY                                                                      | -2.8745625 down |
| NELF         |              | nasal embryonic LHRH factor                                                     | -2.5614614 down |

|              |              |                                                                   |                 |
|--------------|--------------|-------------------------------------------------------------------|-----------------|
|              | BX106347     |                                                                   | -4.6487794 down |
|              |              |                                                                   | -2.4754813 down |
| CCDC64B      | NM_001103175 | coiled-coil domain containing 64B                                 | -8.239313 down  |
| PDZD7        | NM_001195263 | PDZ domain containing 7                                           | -2.757152 down  |
| SORCS3       | NM_014978    | sortilin-related VPS10 domain containing receptor 3               | -4.1854196 down |
| LOC100129027 | NR_038876    | uncharacterized LOC100129027                                      | -2.3324537 down |
| CDC27        | NM_001114091 | cell division cycle 27 homolog (S. cerevisiae)                    | -3.5207305 down |
| LOC400682    | XM_001726878 | zinc finger protein 100-like                                      | -2.0223794 down |
| OR52K2       | NM_001005172 | olfactory receptor, family 52, subfamily K, member 2              | -2.5208087 down |
| PSMD10       |              | proteasome (prosome, macropain) 26S subunit, non-ATPase, 10       | -4.215822 down  |
| ZNF160       | BC000807     | zinc finger protein 160                                           | -2.535495 down  |
| KCNK13       | NM_022054    | potassium channel, subfamily K, member 13                         | -4.140283 down  |
| STAM         | NM_003473    | signal transducing adaptor molecule (SH3 domain and ITAM motif) 1 | -3.2446482 down |
| MPZ          | NM_000530    | myelin protein zero                                               | -2.3164196 down |
| TMEM231      | NM_001077419 | transmembrane protein 231                                         | -2.027912 down  |
|              |              |                                                                   | -4.506873 down  |
| IL1RAPL1     | NM_014271    | interleukin 1 receptor accessory protein-like 1                   | -4.7195106 down |
| AKD1         | AK124171     | adenylate kinase domain containing 1                              | -2.4501972 down |
| C14orf135    | AK095489     | chromosome 14 open reading frame 135                              | -3.2413363 down |
| FLNC         | NM_001458    | filamin C, gamma                                                  | -2.333547 down  |
| GRK1         | NM_002929    | G protein-coupled receptor kinase 1                               | -2.9543786 down |
| C17orf72     | NM_001164257 | chromosome 17 open reading frame 72                               | -4.932738 down  |
| LOC286238    | NM_001100111 | uncharacterized LOC286238                                         | -3.359222 down  |
| CFL1P1       | NR_028492    | cofilin 1 (non-muscle) pseudogene 1                               | -4.1626306 down |
| SCARNA7      | NR_003001    | small Cajal body-specific RNA 7                                   | -2.134681 down  |
| LOC100128869 | XM_001719518 | uncharacterized LOC100128869                                      | -14.568469 down |
| ST8SIA3      | NM_015879    | ST8 alpha-N-acetyl-neuraminide alpha-2,8-sialyltransferase 3      | -2.969064 down  |
| C7orf13      | NR_026865    | chromosome 7 open reading frame 13                                | -3.7078924 down |
| SUSD2        | NM_019601    | sushi domain containing 2                                         | -3.070956 down  |
|              |              |                                                                   | -4.772648 down  |
|              |              |                                                                   | -6.020332 down  |
| SNAI2        | NM_003068    | snail homolog 2 (Drosophila)                                      | -3.1396892 down |
| LOC651337    | XR_132727    | uncharacterized LOC651337                                         | -2.0341203 down |
| TSSK3        | NM_052841    | testis-specific serine kinase 3                                   | -2.4604442 down |
| KCNQ1DN      | NR_024627    | KCNQ1 downstream neighbor (non-protein coding)                    | -2.7120717 down |
| DAAM2        | BC078153     | dishevelled associated activator of morphogenesis 2               | -3.612623 down  |
| OSTBETA      | NM_178859    | organic solute transporter beta                                   | -3.0954852 down |
| DDX11        | NM_030653    | DEAD/H (Asp-Glu-Ala-Asp/His) box polypeptide 11                   | -2.3358989 down |
| UPK3A        | NM_006953    | uropod protein 3A                                                 | -4.2959294 down |
| OPALIN       | NM_001040103 | oligodendrocytic myelin paranodal and inner loop protein          | -2.941597 down  |
| HNRNPU-AS1   | NR_026778    | HNRNPU antisense RNA 1 (non-protein coding)                       | -2.758113 down  |



|               |              |                                                           |                 |
|---------------|--------------|-----------------------------------------------------------|-----------------|
| LOC100129119  | XR_109159    | uncharacterized LOC100129119                              | -4.649454 down  |
| ADAMTS7       | NM_014272    | ADAM metallopeptidase with thrombospondin type 1 motif, 7 | -2.1989279 down |
| KRTAP5-3      | NM_001012708 | keratin associated protein 5-3                            | -3.4099417 down |
| SPTBN5        | NM_016642    | spectrin, beta, non-erythrocytic 5                        | -2.499378 down  |
|               |              |                                                           | -3.400303 down  |
| CCDC166       | NM_001162914 | coiled-coil domain containing 166                         | -2.1435456 down |
| C2orf61       | NM_173649    | chromosome 2 open reading frame 61                        | -4.651796 down  |
| KCNT1         | AK123276     | potassium channel, subfamily T, member 1                  | -3.4384925 down |
|               | AK093210     |                                                           | -3.3209505 down |
| CEACAM5       | NM_004363    | carcinoembryonic antigen-related cell adhesion molecule 5 | -2.1425428 down |
| C19orf26      | NM_152769    | chromosome 19 open reading frame 26                       | -2.3175488 down |
| KCTD5         | NM_018992    | potassium channel tetramerisation domain containing 5     | -2.0377405 down |
|               |              |                                                           | -3.2922227 down |
|               |              |                                                           | -2.3078423 down |
| DKFZp686O1327 | NR_033870    | uncharacterized LOC401014                                 | -2.6219852 down |
| NEURL1B       | NM_001142651 | neuralized homolog 1B (Drosophila)                        | -2.0261936 down |
| CD164L2       |              | CD164 sialomucin-like 2                                   | -2.5628273 down |
|               |              |                                                           | -4.1499066 down |
| LOC100130193  | AK096102     | uncharacterized LOC100130193                              | -4.886785 down  |
| ADAMTSL1      | NM_001040272 | ADAMTS-like 1                                             | -2.7540135 down |
| NEO1          | NM_002499    | neogenin 1                                                | -2.2549496 down |
| SLC35F1       | NM_001029858 | solute carrier family 35, member F1                       | -2.722175 down  |
| PLAC8L1       | NM_001029869 | PLAC8-like 1                                              | -2.2947977 down |
|               |              |                                                           | -2.1359377 down |
| MMP24         | NM_006690    | matrix metallopeptidase 24 (membrane-inserted)            | -2.19764 down   |
| NFIB          | NM_005596    | nuclear factor I/B                                        | -2.010619 down  |
| BTBD9         | NM_052893    | BTB (POZ) domain containing 9                             | -3.1878254 down |
|               | AY203961     |                                                           | -2.5608068 down |
| C1orf86       | AK054818     | chromosome 1 open reading frame 86                        | -4.3577604 down |
|               |              |                                                           | -4.784889 down  |
| GAST          | NM_000805    | gastrin                                                   | -4.0819 down    |
| MGC34800      | XR_110135    | uncharacterized protein MGC34800                          | -2.3042676 down |
|               | AK128007     |                                                           | -4.192814 down  |
|               | AK127623     |                                                           | -2.6761942 down |
| USP2          | NM_004205    | ubiquitin specific peptidase 2                            | -2.1656077 down |
| LOC284930     | AK093107     | uncharacterized LOC284930                                 | -2.3239396 down |
| TUBG2         | NM_016437    | tubulin, gamma 2                                          | -3.9754875 down |
|               |              |                                                           | -2.9490306 down |
| MEP1A         | NM_005588    | meprin A, alpha (PABA peptide hydrolase)                  | -4.245633 down  |
| SDC3          | NM_014654    | syndecan 3                                                | -2.348735 down  |

|              |              |                                                                 |                 |
|--------------|--------------|-----------------------------------------------------------------|-----------------|
| PTPRK        | NM_002844    | protein tyrosine phosphatase, receptor type, K                  | -2.455539 down  |
| MATN1        | NM_002379    | matrilin 1, cartilage matrix protein                            | -2.4572616 down |
| BET3L        | AK002042     | BET3 like (S. cerevisiae)                                       | -2.6196525 down |
| NPVF         | NM_022150    | neuropeptide VF precursor                                       | -2.2994633 down |
| FCRL5        | NM_001195388 | Fc receptor-like 5                                              | -5.0250344 down |
|              | AK026419     |                                                                 | -2.4700818 down |
|              |              |                                                                 | -2.9643085 down |
| LOC100131195 | AK097743     | uncharacterized LOC100131195                                    | -4.797982 down  |
| CLSTN3       | NM_014718    | calsyntenin 3                                                   | -3.9137201 down |
|              |              |                                                                 | -3.0460346 down |
| LEPROTL1     | NM_001128208 | leptin receptor overlapping transcript-like 1                   | -4.4890656 down |
|              |              |                                                                 | -2.522849 down  |
|              |              |                                                                 | -5.2356024 down |
|              |              |                                                                 | -2.2561421 down |
| GLRA4        | NM_001024452 | glycine receptor, alpha 4                                       | -2.072405 down  |
| RTKN         | NM_033046    | rhotekin                                                        | -2.2317336 down |
|              |              |                                                                 | -4.5816 down    |
| DOK7         | AK075037     | docking protein 7                                               | -4.1738076 down |
| BIRC7        | NM_022161    | baculoviral IAP repeat containing 7                             | -3.8651798 down |
| ZDHHC9       | NM_016032    | zinc finger, DHHC-type containing 9                             | -2.7043614 down |
| CHRNA2       | NM_000742    | cholinergic receptor, nicotinic, alpha 2 (neuronal)             | -4.3793488 down |
|              |              |                                                                 | -2.3732464 down |
| IGFALS       | NM_004970    | insulin-like growth factor binding protein, acid labile subunit | -3.3129983 down |
|              |              |                                                                 | -3.6051116 down |
| LOC388882    | XR_109751    | uncharacterized LOC388882                                       | -3.3496366 down |
| HPX-2        | X74861       | homeobox HPX-2                                                  | -3.8764646 down |
| AADACL3      | NM_001103170 | arylacetamide deacetylase-like 3                                | -2.3056881 down |
|              |              |                                                                 | -4.3805804 down |
| GPR52        | NM_005684    | G protein-coupled receptor 52                                   | -2.719857 down  |
| UNC45A       | NM_001039675 | unc-45 homolog A (C. elegans)                                   | -2.9157367 down |
| ANKRD63      | NM_001190479 | ankyrin repeat domain 63                                        | -3.1105874 down |
| LOC401176    | XR_108565    | uncharacterized LOC401176                                       | -2.3629441 down |
|              | XR_132593    |                                                                 | -2.2071903 down |
| C17orf88     | NR_026770    | chromosome 17 open reading frame 88                             | -2.3708618 down |
| TNRC6C       | NM_001142640 | trinucleotide repeat containing 6C                              | -3.187599 down  |
| CDRT1        | NM_006382    | CMT1A duplicated region transcript 1                            | -2.9550984 down |
|              |              |                                                                 | -2.8204217 down |
| PRDM15       | NM_022115    | PR domain containing 15                                         | -2.4915326 down |
|              | XR_110564    |                                                                 | -2.68227 down   |
| IP6K3        | NM_054111    | inositol hexakisphosphate kinase 3                              | -2.1338544 down |
| SETMAR       | NM_006515    | SET domain and mariner transposase fusion gene                  | -3.6181812 down |

|              |              |                                                                                        |                 |
|--------------|--------------|----------------------------------------------------------------------------------------|-----------------|
| NGF          | NM_002506    | nerve growth factor (beta polypeptide)                                                 | -2.1390355 down |
| DDX31        | NM_138620    | DEAD (Asp-Glu-Ala-Asp) box polypeptide 31                                              | -2.0697954 down |
| OVOS         | XM_003403834 | ovostatin                                                                              | -3.0591376 down |
| NANOS2       | NM_001029861 | nanos homolog 2 (Drosophila)                                                           | -3.2480094 down |
| LOC100130417 | NR_026874    | uncharacterized LOC100130417                                                           | -2.8546896 down |
| LOC649201    | XM_001127211 | paraneoplastic antigen like 6A-like                                                    | -2.022891 down  |
| WFS1         | NM_006005    | Wolfram syndrome 1 (wolframin)                                                         | -2.50929 down   |
| PRR25        | NM_001013638 | proline rich 25                                                                        | -2.71824 down   |
| TRIM48       | NM_024114    | tripartite motif containing 48                                                         | -3.0246205 down |
| KIAA1644     | NM_001099294 | KIAA1644                                                                               | -2.8583632 down |
| SERHL2       | NM_014509    | serine hydrolase-like 2                                                                | -2.3131166 down |
| PRPF18       | CU692621     | PRP18 pre-mRNA processing factor 18 homolog (S. cerevisiae)                            | -2.4917176 down |
| HMGB3        | NM_005342    | high mobility group box 3                                                              | -2.2783196 down |
|              | AK127494     |                                                                                        | -3.993354 down  |
| SETBP1       | NM_001130110 | SET binding protein 1                                                                  | -2.84234 down   |
| FBXL22       | NM_203373    | F-box and leucine-rich repeat protein 22                                               | -3.2706625 down |
|              |              |                                                                                        | -2.1899219 down |
| A4GALT       | NM_017436    | alpha 1,4-galactosyltransferase                                                        | -4.01797 down   |
| PHGR1        | NM_001145643 | proline/histidine/glycine-rich 1                                                       | -2.3261058 down |
| LOC729159    | XM_001129515 | UPF0607 protein ENSP00000381418-like                                                   | -4.1811337 down |
| LOC100134868 | NR_004846    | uncharacterized LOC100134868                                                           | -2.9018774 down |
| ADARB2       | AK289895     | adenosine deaminase, RNA-specific, B2                                                  | -2.1572196 down |
| SLC22A13     | NM_004256    | solute carrier family 22 (organic anion transporter), member 13                        | -8.378844 down  |
| KLHL14       | BC021267     | kelch-like 14 (Drosophila)                                                             | -2.8605113 down |
| FAM151A      | NM_176782    | family with sequence similarity 151, member A                                          | -2.6073656 down |
| MAP4         | NM_030885    | microtubule-associated protein 4                                                       | -3.695181 down  |
| SCT          | NM_021920    | secretin                                                                               | -2.1631072 down |
| SNORA26      | A1792523     | small nucleolar RNA, H/ACA box 26                                                      | -3.5881493 down |
| ATAD3C       | NM_001039211 | ATPase family, AAA domain containing 3C                                                | -2.9793437 down |
| DNASE1       | NM_005223    | deoxyribonuclease I                                                                    | -2.3602126 down |
| GATA4        | NM_002052    | GATA binding protein 4                                                                 | -2.032713 down  |
| FRG2C        | NM_001124759 | FSHD region gene 2 family, member C                                                    | -4.7455025 down |
|              | BC015643     |                                                                                        | -2.6952899 down |
| SEMA3G       | NM_020163    | sema domain, immunoglobulin domain (Ig), short basic domain, secreted, (semaphorin) 3G | -2.105367 down  |
| CPAMD8       | NM_015692    | C3 and PZP-like, alpha-2-macroglobulin domain containing 8                             | -2.3752642 down |
| HM13         | NM_178582    | histocompatibility (minor) 13                                                          | -4.8412814 down |
|              |              |                                                                                        | -3.7661602 down |
|              |              |                                                                                        | -2.5732157 down |
| SNORA80      | DB304787     | small nucleolar RNA, H/ACA box 80                                                      | -4.2207484 down |
| ZNF720       |              | zinc finger protein 720                                                                | -2.0350087 down |

|              |              |                                                                                         |                 |
|--------------|--------------|-----------------------------------------------------------------------------------------|-----------------|
| PDE1C        | AK126467     | phosphodiesterase 1C, calmodulin-dependent 70kDa                                        | -2.7776697 down |
|              |              |                                                                                         | -3.7098117 down |
|              |              |                                                                                         | -3.0234857 down |
| PDLIM4       | NM_003687    | PDZ and LIM domain 4                                                                    | -3.443663 down  |
| GLTPD1       | NM_001029885 | glycolipid transfer protein domain containing 1                                         | -4.349214 down  |
|              |              |                                                                                         | -3.0453532 down |
| GALNTL6      | NM_001034845 | UDP-N-acetyl-alpha-D-galactosamine:polypeptide N-acetylgalactosaminyltransferase-like 6 | -2.4416559 down |
| LOC100128946 | NR_038944    | uncharacterized LOC100128946                                                            | -2.120539 down  |
| C10orf91     | NM_173541    | chromosome 10 open reading frame 91                                                     | -2.202203 down  |
|              |              |                                                                                         | -2.1661677 down |
| SH3GL3       | AF036272     | SH3-domain GRB2-like 3                                                                  | -3.3240488 down |
| GABRE        | NM_004961    | gamma-aminobutyric acid (GABA) A receptor, epsilon                                      | -4.76355 down   |
| LOC284240    | AL390159     | uncharacterized LOC284240                                                               | -2.0733082 down |
| BRD7P3       | NR_002730    | bromodomain containing 7 pseudogene 3                                                   | -3.635799 down  |
| ZNF329       | AK090893     | zinc finger protein 329                                                                 | -2.483955 down  |
| LOC441179    | XR_112948    | uncharacterized LOC441179                                                               | -2.3863375 down |
|              |              |                                                                                         | -2.5900695 down |
| CA6          | NM_001215    | carbonic anhydrase VI                                                                   | -2.0829291 down |
| C5orf20      | NM_130848    | chromosome 5 open reading frame 20                                                      | -2.086026 down  |
| FZD4         | NM_012193    | frizzled family receptor 4                                                              | -2.6502554 down |
|              |              |                                                                                         | -2.7675278 down |
| OLFML3       | NM_020190    | olfactomedin-like 3                                                                     | -2.7830617 down |
| SH3BP5L      | AK125138     | SH3-binding domain protein 5-like                                                       | -4.087898 down  |
| TECRL        | NM_001010874 | trans-2,3-enoyl-CoA reductase-like                                                      | -3.893835 down  |
| MAGIX        | AK025340     | MAGI family member, X-linked                                                            | -2.5316963 down |
| LOC541473    | NR_003602    | FK506 binding protein 6, 36kDa pseudogene                                               | -2.1551108 down |
| SLC2A6       | NM_017585    | solute carrier family 2 (facilitated glucose transporter), member 6                     | -2.6380157 down |
| MDM2         | NM_002392    | Mdm2 p53 binding protein homolog (mouse)                                                | -2.5344481 down |
| CNGA3        | NM_001298    | cyclic nucleotide gated channel alpha 3                                                 | -2.9793782 down |
| AP1S1        | NM_001283    | adaptor-related protein complex 1, sigma 1 subunit                                      | -3.3726618 down |
| SLC18A1      | NM_001142325 | solute carrier family 18 (vesicular monoamine), member 1                                | -3.7324808 down |
| HOXA5        | NM_019102    | homeobox A5                                                                             | -2.3764973 down |
| DNAJB3       | NM_001001394 | DnaJ (Hsp40) homolog, subfamily B, member 3                                             | -4.1020045 down |
| CELF1        | NM_198700    | CUGBP, Elav-like family member 1                                                        | -2.375127 down  |
| PTGER1       | NM_000955    | prostaglandin E receptor 1 (subtype EP1), 42kDa                                         | -5.4921627 down |
| CAPN5        | NM_004055    | calpain 5                                                                               | -2.5296283 down |
|              |              |                                                                                         | -2.2140472 down |
|              | CR979835     |                                                                                         | -3.381196 down  |
|              |              |                                                                                         | -3.1748285 down |
| LOC399744    | NR_024497    | uncharacterized LOC399744                                                               | -3.1626635 down |

|              |              |                                                                                  |                 |
|--------------|--------------|----------------------------------------------------------------------------------|-----------------|
|              |              |                                                                                  | -2.0138168 down |
| POLR2H       | CR590527     | polymerase (RNA) II (DNA directed) polypeptide H                                 | -2.8910644 down |
| NYNRIN       | NM_025081    | NYN domain and retroviral integrase containing                                   | -2.9919755 down |
|              |              |                                                                                  | -4.1788774 down |
| ACTL7B       | NM_006686    | actin-like 7B                                                                    | -2.1480823 down |
| LOC441493    | XR_113304    | uncharacterized LOC441493                                                        | -2.3391201 down |
| KRTAP4-5     | NM_033188    | keratin associated protein 4-5                                                   | -2.0711207 down |
| RGL3         | NM_001161616 | ral guanine nucleotide dissociation stimulator-like 3                            | -2.3689911 down |
| RUNX2        | NM_001015051 | runt-related transcription factor 2                                              | -5.1165733 down |
| OR5W2        | NM_001001960 | olfactory receptor, family 5, subfamily W, member 2                              | -2.1485484 down |
| CHIC1        | NM_001039840 | cysteine-rich hydrophobic domain 1                                               | -2.7092931 down |
| DNAJC14      | NM_032364    | DnaJ (Hsp40) homolog, subfamily C, member 14                                     | -2.3243752 down |
| RLTPR        | NM_001013838 | RGD motif, leucine rich repeats, tropomodulin domain and proline-rich containing | -2.5516832 down |
| NPPB         | NM_002521    | natriuretic peptide B                                                            | -2.1878586 down |
| LOC284242    | BC035844     | uncharacterized LOC284242                                                        | -5.0251207 down |
| LOC442421    | NR_024496    | uncharacterized LOC442421                                                        | -3.8294752 down |
| SCN4B        | NM_174934    | sodium channel, voltage-gated, type IV, beta                                     | -4.41341 down   |
|              | XR_110674    |                                                                                  | -2.8677733 down |
| POLE2        | NM_002692    | polymerase (DNA directed), epsilon 2 (p59 subunit)                               | -2.2603612 down |
| ANKRD20A2    | NM_001012421 | ankyrin repeat domain 20 family, member A2                                       | -3.1776767 down |
| DPYSL3       | NM_001387    | dihydropyrimidinase-like 3                                                       | -7.8794856 down |
|              |              |                                                                                  | -2.1261191 down |
| LOC100131434 | AK310119     | uncharacterized LOC100131434                                                     | -2.4553752 down |
|              | AK091705     |                                                                                  | -2.938854 down  |
| SPIRE2       | NM_032451    | spire homolog 2 (Drosophila)                                                     | -3.050261 down  |
| NPAS3        | NM_022123    | neuronal PAS domain protein 3                                                    | -2.5736332 down |
| RAP1GAP      |              | RAP1 GTPase activating protein                                                   | -3.8229792 down |
| FOXD4L2      | NM_001099279 | forkhead box D4-like 2                                                           | -4.9400506 down |
| ROR1         | NM_001083592 | receptor tyrosine kinase-like orphan receptor 1                                  | -3.349082 down  |
| JPH2         | NM_020433    | junctophilin 2                                                                   | -2.6826003 down |
| LOC100134368 | NR_024453    | uncharacterized LOC100134368                                                     | -3.5742295 down |
| SERP1        | AK125413     | stress-associated endoplasmic reticulum protein 1                                | -2.0096798 down |
| FAM159A      | AK128236     | family with sequence similarity 159, member A                                    | -2.5474887 down |
| ZNF667       | NM_022103    | zinc finger protein 667                                                          | -3.8127968 down |
| RIMS1        | NM_014989    | regulating synaptic membrane exocytosis 1                                        | -2.0362244 down |
|              |              |                                                                                  | -2.629157 down  |
|              |              |                                                                                  | -3.5300465 down |
| ASCL1        | NM_004316    | achaete-scute complex homolog 1 (Drosophila)                                     | -2.3816438 down |
| KIF26B       | NM_018012    | kinesin family member 26B                                                        | -2.444543 down  |
| KIAA1984     | NM_001039374 | KIAA1984                                                                         | -4.78533 down   |

|           |              |                                                                |                 |
|-----------|--------------|----------------------------------------------------------------|-----------------|
| UROCI1    | NM_144639    | urocanase domain containing 1                                  | -2.5256565 down |
| DUOX2     | NM_014080    | dual oxidase 2                                                 | -2.9561653 down |
| CDK13     | NM_031267    | cyclin-dependent kinase 13                                     | -2.6361322 down |
| KY        | NM_178554    | kyphoscoliosis peptidase                                       | -2.494125 down  |
|           |              |                                                                | -2.5735772 down |
| MMD2      | NM_198403    | monocyte to macrophage differentiation-associated 2            | -2.3638217 down |
| CXorf49B  | NM_001145139 | chromosome X open reading frame 49B                            | -2.1022503 down |
|           | AK074886     |                                                                | -3.186019 down  |
| HAND1     | NM_004821    | heart and neural crest derivatives expressed 1                 | -2.063052 down  |
| RNASE7    | NM_032572    | ribonuclease, RNase A family, 7                                | -3.0744746 down |
| FAM83G    | NM_001039999 | family with sequence similarity 83, member G                   | -3.3051016 down |
| NR4A3     | NM_173200    | nuclear receptor subfamily 4, group A, member 3                | -2.4256346 down |
| SPACA4    | NM_133498    | sperm acrosome associated 4                                    | -2.8658245 down |
|           | AK131247     |                                                                | -3.077039 down  |
| WDFY4     | NM_020945    | WDFY family member 4                                           | -6.073584 down  |
|           | AK124259     |                                                                | -2.2198312 down |
| NRXN1     | NM_004801    | neurexin 1                                                     | -6.327814 down  |
| PGAM2     | NM_000290    | phosphoglycerate mutase 2 (muscle)                             | -2.2873666 down |
| MLANA     | NM_005511    | melan-A                                                        | -2.224407 down  |
|           | XR_110084    |                                                                | -3.0428755 down |
| MAS1L     | NM_052967    | MAS1 oncogene-like                                             | -2.6141255 down |
|           |              |                                                                | -2.8040004 down |
|           |              |                                                                | -2.8989537 down |
| C1orf94   | NM_032884    | chromosome 1 open reading frame 94                             | -3.756665 down  |
| EVC       | NM_153717    | Ellis van Creveld syndrome                                     | -2.7697384 down |
| PLA2G2F   | NM_022819    | phospholipase A2, group IIF                                    | -3.403952 down  |
| TGM6      | NM_198994    | transglutaminase 6                                             | -2.2753196 down |
| MAST4     | NM_198828    | microtubule associated serine/threonine kinase family member 4 | -3.4127192 down |
| MGC10814  | BC004943     | uncharacterized protein MGC10814                               | -2.439593 down  |
| CHKA      | NM_001277    | choline kinase alpha                                           | -3.3115492 down |
|           |              |                                                                | -3.0070133 down |
| LOC729770 | XR_112442    | uncharacterized LOC729770                                      | -6.183721 down  |
|           |              |                                                                | -2.9896858 down |
|           | AK130290     |                                                                | -3.0822678 down |
| PREPL     | NM_006036    | prolyl endopeptidase-like                                      | -2.0861392 down |
| FLJ20712  | XR_108766    | uncharacterized FLJ20712                                       | -4.678123 down  |
| GDNF      | NM_000514    | glial cell derived neurotrophic factor                         | -2.1684034 down |
| DYNC11    | NM_004411    | dynein, cytoplasmic 1, intermediate chain 1                    | -3.1733766 down |
|           |              |                                                                | -2.6779542 down |
| POLQ      | NM_199420    | polymerase (DNA directed), theta                               | -3.7286987 down |
| ZDHHC14   | NM_153746    | zinc finger, DHHC-type containing 14                           | -2.8085394 down |

|              |              |                                                                                                                          |                 |
|--------------|--------------|--------------------------------------------------------------------------------------------------------------------------|-----------------|
| CYP2C9       | NM_000771    | cytochrome P450, family 2, subfamily C, polypeptide 9                                                                    | -2.0049195 down |
| HSD3B1       | NM_000862    | hydroxy-delta-5-steroid dehydrogenase, 3 beta- and steroid delta-isomerase 1                                             | -2.3151848 down |
| TSPAN15      | NM_012339    | tetraspanin 15                                                                                                           | -3.7497544 down |
| GOLGA6L5     | NR_003246    | golgin A6 family-like 5 (pseudogene)                                                                                     | -3.574765 down  |
| LOC254099    | NR_038869    | uncharacterized LOC254099                                                                                                | -2.1128137 down |
|              |              |                                                                                                                          | -3.0458848 down |
| LOC100132147 | BC036435     | uncharacterized LOC100132147                                                                                             | -2.5759373 down |
| PTK2B        | AK128371     | PTK2B protein tyrosine kinase 2 beta                                                                                     | -5.003921 down  |
|              |              |                                                                                                                          | -2.0228636 down |
| TMEM213      | NM_001085429 | transmembrane protein 213                                                                                                | -2.7899535 down |
| ATP6V0A4     | NM_020632    | ATPase, H+ transporting, lysosomal V0 subunit a4                                                                         | -2.221564 down  |
| CENPT        | NM_025082    | centromere protein T                                                                                                     | -3.2732708 down |
| ZNF236       | AF085243     | zinc finger protein 236                                                                                                  | -3.1913104 down |
|              | XR_109245    |                                                                                                                          | -2.5847692 down |
| PAQR3        | BC031256     | progesterone and adipoQ receptor family member III                                                                       | -4.154528 down  |
| FBXO48       | NM_001024680 | F-box protein 48                                                                                                         | -2.45437 down   |
| AP3B2        | NM_004644    | adaptor-related protein complex 3, beta 2 subunit                                                                        | -3.4030423 down |
| PLA2G4F      | NM_213600    | phospholipase A2, group IVF                                                                                              | -2.6701288 down |
| PAX3         | NM_013942    | paired box 3                                                                                                             | -3.6595964 down |
| LOC100133306 | AK125136     | uncharacterized LOC100133306                                                                                             | -2.4206388 down |
| BARHL1       | NM_020064    | BarH-like homeobox 1                                                                                                     | -2.5366955 down |
| LRRTM2       | NM_015564    | leucine rich repeat transmembrane neuronal 2                                                                             | -2.1928859 down |
| GLOD5        | NM_001080489 | glyoxalase domain containing 5                                                                                           | -3.307993 down  |
| CHAC1        | NM_024111    | ChaC, cation transport regulator homolog 1 (E. coli)                                                                     | -3.0818245 down |
| ENTPD3       | NM_001248    | ectonucleoside triphosphate diphosphohydrolase 3                                                                         | -3.190444 down  |
| HOXD10       | NM_002148    | homeobox D10                                                                                                             | -2.7860587 down |
| IGSF1        | NM_205833    | immunoglobulin superfamily, member 1                                                                                     | -2.2437158 down |
| CCDC147      |              | coiled-coil domain containing 147                                                                                        | -2.0214283 down |
| GPR151       | NM_194251    | G protein-coupled receptor 151                                                                                           | -2.0616794 down |
| KRTAP7-1     | NM_181606    | keratin associated protein 7-1 (gene/pseudogene)                                                                         | -2.0595503 down |
| FHL2         | CR936682     | four and a half LIM domains 2                                                                                            | -3.5324337 down |
| ZSWIM5       | NM_020883    | zinc finger, SWIM-type containing 5                                                                                      | -2.3930855 down |
| PEG3-AS1     | NR_023847    | PEG3 antisense RNA 1 (non-protein coding)                                                                                | -2.824169 down  |
| C7orf60      | NM_152556    | chromosome 7 open reading frame 60                                                                                       | -2.3955445 down |
|              |              |                                                                                                                          | -2.2365222 down |
| KRTAP9-4     | NM_033191    | keratin associated protein 9-4                                                                                           | -2.282601 down  |
| MS4A2        | NM_000139    | membrane-spanning 4-domains, subfamily A, member 2 (Fc fragment of IgE, high affinity I, receptor for; beta polypeptide) | -2.3528442 down |
| LINC00482    | NR_038080    | long intergenic non-protein coding RNA 482                                                                               | -2.0731435 down |
| OTOG         | AK128214     | otogelin                                                                                                                 | -2.0336635 down |
| MOGAT1       | NM_058165    | monoacylglycerol O-acyltransferase 1                                                                                     | -2.0775344 down |

|              |              |                                                                            |                 |
|--------------|--------------|----------------------------------------------------------------------------|-----------------|
| DCDC5        | NM_020869    | doublecortin domain containing 5                                           | -2.1005309 down |
| SGSM1        | NM_001039948 | small G protein signaling modulator 1                                      | -4.0712523 down |
|              | BI224516     |                                                                            | -4.1411424 down |
| H1FOO        | NM_153833    | H1 histone family, member O, oocyte-specific                               | -2.195511 down  |
| HHIPL1       | NM_001127258 | HHIP-like 1                                                                | -2.9411142 down |
| TNK2         | NM_001010938 | tyrosine kinase, non-receptor, 2                                           | -3.161386 down  |
| PRSS27       | NM_031948    | protease, serine 27                                                        | -2.892147 down  |
| ADAD2        | NM_139174    | adenosine deaminase domain containing 2                                    | -2.6538084 down |
| EGFLAM       | NM_152403    | EGF-like, fibronectin type III and laminin G domains                       | -2.8712275 down |
| IL21         | NM_021803    | interleukin 21                                                             | -2.505085 down  |
|              |              |                                                                            | -3.3438714 down |
| C12orf77     | NM_001101339 | chromosome 12 open reading frame 77                                        | -2.3369946 down |
| PRPF40B      | NM_001031698 | PRP40 pre-mRNA processing factor 40 homolog B (S. cerevisiae)              | -2.1412349 down |
| OR2AG1       | NM_001004489 | olfactory receptor, family 2, subfamily AG, member 1                       | -2.0516229 down |
| KRTAP13-3    | NM_181622    | keratin associated protein 13-3                                            | -2.4094756 down |
| SHANK2       | NM_012309    | SH3 and multiple ankyrin repeat domains 2                                  | -3.990878 down  |
| LOC100129840 | AK126633     | uncharacterized LOC100129840                                               | -2.2003484 down |
| SAMM50       | AK124895     | sorting and assembly machinery component 50 homolog (S. cerevisiae)        | -2.794607 down  |
| CLIC3        | NM_004669    | chloride intracellular channel 3                                           | -2.174027 down  |
| SLC10A7      | NM_001029998 | solute carrier family 10 (sodium/bile acid cotransporter family), member 7 | -2.0299864 down |
|              |              |                                                                            | -4.5553555 down |
| GRIK1-AS1    | NR_027021    | GRIK1 antisense RNA 1 (non-protein coding)                                 | -4.8278446 down |
| IGF1         | NM_000618    | insulin-like growth factor 1 (somatomedin C)                               | -2.6714737 down |
| SMPDL3B      | NM_001009568 | sphingomyelin phosphodiesterase, acid-like 3B                              | -2.5115447 down |
| DEFB115      | NM_001037730 | defensin, beta 115                                                         | -2.3854241 down |
| LOC731789    | NR_026794    | uncharacterized LOC731789                                                  | -2.6800928 down |
| IDI2         | NM_033261    | isopentenyl-diphosphate delta isomerase 2                                  | -2.9759207 down |
| MGC16121     | NR_024607    | uncharacterized protein MGC16121                                           | -2.8313148 down |
| FAM99A       | AK124823     | family with sequence similarity 99, member A (non-protein coding)          | -2.148725 down  |
|              |              |                                                                            | -3.501977 down  |
| TAS2R13      | NM_023920    | taste receptor, type 2, member 13                                          | -6.0611205 down |
| CHRD2        | NM_015424    | chordin-like 2                                                             | -2.5211065 down |
|              |              |                                                                            | -2.2791998 down |
| C1QTNF1      | NM_198594    | C1q and tumor necrosis factor related protein 1                            | -3.01527 down   |
| RNF212       | NM_001131034 | ring finger protein 212                                                    | -2.3526158 down |
| KIAA0889     | NM_199181    | KIAA0889                                                                   | -3.131229 down  |
| YIF1B        | NM_033557    | Yip1 interacting factor homolog B (S. cerevisiae)                          | -2.184969 down  |
| FAM134A      | NM_024293    | family with sequence similarity 134, member A                              | -2.2635784 down |
|              |              |                                                                            | -3.0650012 down |
| ACTN2        | NM_001103    | actinin, alpha 2                                                           | -2.0038512 down |



|            |              |                                                                 |                 |
|------------|--------------|-----------------------------------------------------------------|-----------------|
| TMPRSS13   | NM_001077263 | transmembrane protease, serine 13                               | -2.1636193 down |
| SOX21      | NM_007084    | SRY (sex determining region Y)-box 21                           | -3.1146472 down |
| OR4F29     | NM_001005221 | olfactory receptor, family 4, subfamily F, member 29            | -2.3857095 down |
| TREH       | NM_007180    | trehalase (brush-border membrane glycoprotein)                  | -3.3082974 down |
| LOC440040  | NR_027044    | glutamate receptor, metabotropic 5 pseudogene                   | -2.1251934 down |
| SERPINB4   | NM_002974    | serpin peptidase inhibitor, clade B (ovalbumin), member 4       | -2.2896538 down |
| DMBX1      | NM_147192    | diencephalon/mesencephalon homeobox 1                           | -2.8457117 down |
|            | AK054875     |                                                                 | -3.8827298 down |
|            |              |                                                                 | -2.4108953 down |
| CASR       | NM_001178065 | calcium-sensing receptor                                        | -2.2855563 down |
| EGFR       | NM_201282    | epidermal growth factor receptor                                | -3.1577954 down |
| LOC653712  | NR_034179    | intraflagellar transport 122 homolog (Chlamydomonas) pseudogene | -4.171725 down  |
| GRHL1      | NM_198182    | grainyhead-like 1 (Drosophila)                                  | -2.2964911 down |
| AGBL1      | NM_152336    | ATP/GTP binding protein-like 1                                  | -2.045469 down  |
|            | BC031238     |                                                                 | -2.8013902 down |
| DEFB123    | NM_153324    | defensin, beta 123                                              | -2.784746 down  |
| FN1        | NM_054034    | fibronectin 1                                                   | -2.2919369 down |
| RBM39      | NM_001242600 | RNA binding motif protein 39                                    | -2.0929222 down |
| EPHA10     | NM_173641    | EPH receptor A10                                                | -2.3768528 down |
| CTSL3      | NR_027917    | cathepsin L family member 3                                     | -3.0742848 down |
| ANKRD36BP1 | NR_026844    | ankyrin repeat domain 36B pseudogene 1                          | -2.0090399 down |
|            |              |                                                                 | -3.0410738 down |
| FRG2B      | NM_001080998 | FSHD region gene 2 family, member B                             | -3.0783799 down |
|            | AK128036     |                                                                 | -2.6380951 down |
| PYY2       | NR_003064    | peptide YY, 2 (seminalplasmin)                                  | -2.9844809 down |
|            |              |                                                                 | -3.6973255 down |
| BACE1      | NM_012104    | beta-site APP-cleaving enzyme 1                                 | -4.215377 down  |
| KCNIP2     | NM_173197    | Kv channel interacting protein 2                                | -2.0455768 down |
| TBC1D24    | NM_020705    | TBC1 domain family, member 24                                   | -2.0904098 down |
| PCA3       | NR_015342    | prostate cancer antigen 3 (non-protein coding)                  | -3.2699623 down |
| PLA2G4D    | NM_178034    | phospholipase A2, group IVD (cytosolic)                         | -2.7543018 down |
| LOC729626  | XM_001133811 | uncharacterized LOC729626                                       | -4.814678 down  |
| GJC3       | NM_181538    | gap junction protein, gamma 3, 30.2kDa                          | -7.2663884 down |
|            |              |                                                                 | -2.6411629 down |
| WFDC5      | NM_145652    | WAP four-disulfide core domain 5                                | -5.2364945 down |
| LRRC14B    | NM_001080478 | leucine rich repeat containing 14B                              | -4.1470437 down |
| GUCA2A     | NM_033553    | guanylate cyclase activator 2A (guanylin)                       | -2.3264434 down |
| LOC388849  | NM_001243537 | uncharacterized LOC388849                                       | -2.9330778 down |
|            |              |                                                                 | -3.5745382 down |
| BAD        | AK309150     | BCL2-associated agonist of cell death                           | -2.5891025 down |
|            |              |                                                                 | -3.2103443 down |

|              |              |                                                                                        |                 |
|--------------|--------------|----------------------------------------------------------------------------------------|-----------------|
| SPRR2C       | NR_003062    | small proline-rich protein 2C (pseudogene)                                             | -5.268663 down  |
| COPS7B       | NM_022730    | COP9 constitutive photomorphogenic homolog subunit 7B (Arabidopsis)                    | -3.5340283 down |
| CHAT         | NM_020549    | choline O-acetyltransferase                                                            | -2.5076835 down |
| CYP2D6       | NM_000106    | cytochrome P450, family 2, subfamily D, polypeptide 6                                  | -2.136789 down  |
|              | BC029043     |                                                                                        | -2.434501 down  |
| LOC100132363 | AK096512     | uncharacterized LOC100132363                                                           | -2.4933207 down |
| PTH2         | NM_178449    | parathyroid hormone 2                                                                  | -2.7637966 down |
|              | DQ786249     |                                                                                        | -4.879596 down  |
| TUBG1        | NM_001070    | tubulin, gamma 1                                                                       | -2.647618 down  |
| LOC100128320 | AK125438     | uncharacterized LOC100128320                                                           | -5.204045 down  |
| MCCD1        | NM_001011700 | mitochondrial coiled-coil domain 1                                                     | -2.6316607 down |
| SLC22A12     | NM_144585    | solute carrier family 22 (organic anion/urate transporter), member 12                  | -2.382098 down  |
| GPRC6A       | NM_148963    | G protein-coupled receptor, family C, group 6, member A                                | -2.0084155 down |
|              | CN283607     |                                                                                        | -2.0692704 down |
| LOC257152    | AK001439     | uncharacterized LOC257152                                                              | -4.5231023 down |
| LOC644083    | XR_112044    | uncharacterized LOC644083                                                              | -2.031323 down  |
| KIF18B       | NM_001080443 | kinesin family member 18B                                                              | -2.4329178 down |
|              | AK127601     |                                                                                        | -7.013296 down  |
| FAM182B      | NR_027061    | family with sequence similarity 182, member B                                          | -4.446895 down  |
|              |              |                                                                                        | -2.805535 down  |
| LOC645427    | AK094407     | uncharacterized LOC645427                                                              | -2.940977 down  |
| LOC646034    | AK125175     | uncharacterized LOC646034                                                              | -2.8623116 down |
| SLC22A6      | NM_153277    | solute carrier family 22 (organic anion transporter), member 6                         | -3.6926575 down |
| OR2L3        | NM_001004687 | olfactory receptor, family 2, subfamily L, member 3                                    | -3.0904346 down |
|              |              | solute carrier family 7 (cationic amino acid transporter, $\gamma^+$ system), member 3 |                 |
| LOC284379    | NR_002938    | pseudogene                                                                             | -2.5896008 down |
| LOC728093    | XR_133401    | putative POM121-like protein 1-like                                                    | -3.1270144 down |
| LOC339240    | NR_001443    | keratin 17 pseudogene                                                                  | -2.251825 down  |
| DNM1         | AB209124     | dynamamin 1                                                                            | -5.9209957 down |
| OR1K1        | NM_080859    | olfactory receptor, family 1, subfamily K, member 1                                    | -2.29827 down   |
| TMEM239      | NM_001167670 | transmembrane protein 239                                                              | -2.354593 down  |
| LOC646743    | NR_033930    | uncharacterized LOC646743                                                              | -6.9335494 down |
| TNNT2        | NM_000364    | troponin T type 2 (cardiac)                                                            | -3.6965022 down |
| KLK15        | NM_017509    | kallikrein-related peptidase 15                                                        | -2.576642 down  |
| C9orf152     | NM_001012993 | chromosome 9 open reading frame 152                                                    | -2.067756 down  |
| SCGB1D2      | NM_006551    | secretoglobin, family 1D, member 2                                                     | -2.367468 down  |
| PRKG2        | NM_006259    | protein kinase, cGMP-dependent, type II                                                | -2.108568 down  |
|              | XR_110942    |                                                                                        | -6.3074183 down |
| LOC100130175 | AK125829     | uncharacterized LOC100130175                                                           | -2.659356 down  |
|              |              |                                                                                        | -4.5740514 down |
|              |              |                                                                                        | -4.9121447 down |

|           |              |                                                                         |                 |
|-----------|--------------|-------------------------------------------------------------------------|-----------------|
| C9orf147  | XR_133532    | chromosome 9 open reading frame 147                                     | -2.159597 down  |
|           |              |                                                                         | -2.1852236 down |
| SRCRB4D   | NM_080744    | scavenger receptor cysteine rich domain containing, group B (4 domains) | -2.0075288 down |
| FLJ30403  | NR_034159    | uncharacterized LOC729975                                               | -5.3173976 down |
| SNX21     | NM_152897    | sorting nexin family member 21                                          | -2.4536612 down |
| PRR20B    | NM_001130404 | proline rich 20B                                                        | -2.647472 down  |
|           | AW002507     |                                                                         | -3.341208 down  |
|           |              |                                                                         | -2.7077096 down |
|           |              |                                                                         | -2.3534725 down |
| MUC13     | NM_033049    | mucin 13, cell surface associated                                       | -6.926307 down  |
| TTY14     | NR_001543    | testis-specific transcript, Y-linked 14 (non-protein coding)            | -2.7651021 down |
| NT5E      | NM_002526    | 5'-nucleotidase, ecto (CD73)                                            | -2.1316285 down |
| C2orf66   | NM_213608    | chromosome 2 open reading frame 66                                      | -2.7817643 down |
| RFPL4A    | NM_001145014 | ret finger protein-like 4A                                              | -2.625456 down  |
|           | AK125780     |                                                                         | -2.2565725 down |
| CELA3A    | AK308514     | chymotrypsin-like elastase family, member 3A                            | -5.3999424 down |
|           |              |                                                                         | -3.0245314 down |
| DKK3      | NM_015881    | dickkopf 3 homolog (Xenopus laevis)                                     | -5.5479383 down |
| C14orf162 | NR_024630    | chromosome 14 open reading frame 162                                    | -2.351535 down  |
| MYL3      | NM_000258    | myosin, light chain 3, alkali; ventricular, skeletal, slow              | -3.9522247 down |
|           |              |                                                                         | -3.6487744 down |
| SLC8A2    | NM_015063    | solute carrier family 8 (sodium/calcium exchanger), member 2            | -3.599214 down  |
|           |              |                                                                         | -2.4550724 down |
|           |              |                                                                         | -2.405829 down  |
|           |              |                                                                         | -2.266612 down  |
| ASTL      | NM_001002036 | astacin-like metallo-endopeptidase (M12 family)                         | -5.6348124 down |
| FAM47A    | NM_203408    | family with sequence similarity 47, member A                            | -2.873728 down  |
| OR2T1     | NM_030904    | olfactory receptor, family 2, subfamily T, member 1                     | -2.457143 down  |
| OR5E1P    | AF309699     | olfactory receptor, family 5, subfamily E, member 1 pseudogene          | -2.6311245 down |
| OR52R1    | NM_001005177 | olfactory receptor, family 52, subfamily R, member 1                    | -2.3003714 down |
| COL23A1   | CU692082     | collagen, type XXIII, alpha 1                                           | -2.252874 down  |
| KCNJ13    | NM_002242    | potassium inwardly-rectifying channel, subfamily J, member 13           | -3.466033 down  |
| LOC440131 | NR_033889    | uncharacterized LOC440131                                               | -3.2540586 down |
|           | BM457408     |                                                                         | -2.5434105 down |
| HSPB1     | NM_001540    | heat shock 27kDa protein 1                                              | -2.020122 down  |
|           | AK123300     |                                                                         | -2.0487065 down |
| SLIT3     | NM_003062    | slit homolog 3 (Drosophila)                                             | -2.226543 down  |
| LAMA4     | NM_001105206 | laminin, alpha 4                                                        | -5.1228747 down |
| BCL2L15   | NM_001010922 | BCL2-like 15                                                            | -3.1335475 down |
| SIGLECP3  | NR_002804    | sialic acid binding Ig-like lectin, pseudogene 3                        | -5.5102215 down |
|           |              |                                                                         | -2.6297312 down |

|              |              |                                                                                                 |                 |
|--------------|--------------|-------------------------------------------------------------------------------------------------|-----------------|
| USP21        | NM_001014443 | ubiquitin specific peptidase 21                                                                 | -2.4280882 down |
| OR1C1        | NM_012353    | olfactory receptor, family 1, subfamily C, member 1                                             | -2.6557124 down |
| SLC4A2       | NM_003040    | solute carrier family 4, anion exchanger, member 2 (erythrocyte membrane protein band 3-like 1) | -2.6451623 down |
| DOC2B        | NM_003585    | double C2-like domains, beta                                                                    | -2.101427 down  |
| VKORC1       | AK125618     | vitamin K epoxide reductase complex, subunit 1                                                  | -3.1096578 down |
|              |              |                                                                                                 | -5.4172783 down |
| LOC100652824 | XM_003403420 | uncharacterized LOC100652824                                                                    | -2.028815 down  |
| ACSM5        | NM_017888    | acyl-CoA synthetase medium-chain family member 5                                                | -3.1996808 down |
| LOC100131434 | NR_027455    | uncharacterized LOC100131434                                                                    | -3.4121733 down |
|              |              |                                                                                                 | -4.2110543 down |
| LOC391767    | XM_001715028 | putative TAF11-like protein ENSP00000332601-like                                                | -3.2585142 down |
|              |              |                                                                                                 | -2.1952505 down |
| CHST14       | NM_130468    | carbohydrate (N-acetylgalactosamine 4-0) sulfotransferase 14                                    | -2.205755 down  |
| SLC9A5       | NM_004594    | solute carrier family 9 (sodium/hydrogen exchanger), member 5                                   | -2.5307686 down |
|              |              |                                                                                                 | -3.3831615 down |
| SPANXA1      | NM_013453    | sperm protein associated with the nucleus, X-linked, family member A1                           | -3.1174965 down |
| MYH15        | NM_014981    | myosin, heavy chain 15                                                                          | -2.0230348 down |
| NTN5         | NM_145807    | netrin 5                                                                                        | -3.8881257 down |
| SGPP2        | NM_152386    | sphingosine-1-phosphate phosphatase 2                                                           | -2.0176077 down |
| ATP4B        | NM_000705    | ATPase, H <sup>+</sup> /K <sup>+</sup> exchanging, beta polypeptide                             | -3.2286546 down |
|              |              |                                                                                                 | -5.982001 down  |
| C9orf96      | NM_153710    | chromosome 9 open reading frame 96                                                              | -2.5803359 down |
| FHAD1        | NM_052929    | forkhead-associated (FHA) phosphopeptide binding domain 1                                       | -2.1333544 down |
| ATM          | BC007023     | ataxia telangiectasia mutated                                                                   | -2.143438 down  |
| ZNRD1-AS1    | NR_026751    | ZNRD1 antisense RNA 1 (non-protein coding)                                                      | -5.032544 down  |
|              |              |                                                                                                 | -3.5694723 down |
| BMP10        | NM_014482    | bone morphogenetic protein 10                                                                   | -2.414793 down  |
| PPAN-P2RY11  | NM_001040664 | PPAN-P2RY11 readthrough                                                                         | -4.0220838 down |
| SPRY4        | NM_030964    | sprouty homolog 4 (Drosophila)                                                                  | -2.0099323 down |
| HAPLN1       | NM_001884    | hyaluronan and proteoglycan link protein 1                                                      | -2.2465894 down |
| C9orf153     | NM_001010907 | chromosome 9 open reading frame 153                                                             | -2.542598 down  |
| LYPD6        | NM_001195685 | LY6/PLAUR domain containing 6                                                                   | -3.7093213 down |
|              |              |                                                                                                 | -2.8566647 down |
| CST1         | NM_001898    | cystatin SN                                                                                     | -2.5339808 down |
| SYNGAP1      | NM_006772    | synaptic Ras GTPase activating protein 1                                                        | -2.971704 down  |
| LOC647983    | AK126828     | uncharacterized LOC647983                                                                       | -4.001189 down  |
|              |              |                                                                                                 | -2.1137738 down |
| SMPX         | NM_014332    | small muscle protein, X-linked                                                                  | -2.355111 down  |
| TMC8         | NM_152468    | transmembrane channel-like 8                                                                    | -2.5862494 down |
| PPIL4        | NM_139126    | peptidylprolyl isomerase (cyclophilin)-like 4                                                   | -2.300738 down  |

|              |              |                                                             |                 |
|--------------|--------------|-------------------------------------------------------------|-----------------|
| NIPAL2       | NM_024759    | NIPA-like domain containing 2                               | -2.0928764 down |
| TMEM191B     | NM_001242313 | transmembrane protein 191B                                  | -2.428717 down  |
| TRIM31       | NM_007028    | tripartite motif containing 31                              | -2.069862 down  |
|              | BC066548     |                                                             | -2.1639297 down |
| GCM2         | NM_004752    | glial cells missing homolog 2 (Drosophila)                  | -4.5928836 down |
| PTAR1        | AK127511     | protein prenyltransferase alpha subunit repeat containing 1 | -2.4225144 down |
| SLC25A35     | NM_201520    | solute carrier family 25, member 35                         | -2.069909 down  |
| SPDYE3       | NM_001004351 | speedy homolog E3 (Xenopus laevis)                          | -5.2403007 down |
| EMILIN1      | NM_007046    | elastin microfibril interfacier 1                           | -2.524348 down  |
| C17orf47     | NM_001038704 | chromosome 17 open reading frame 47                         | -4.134124 down  |
| C20orf112    | NM_080616    | chromosome 20 open reading frame 112                        | -3.826094 down  |
| OLIG3        | NM_175747    | oligodendrocyte transcription factor 3                      | -3.3683784 down |
| CELF5        | NM_021938    | CUGBP, Elav-like family member 5                            | -2.1728947 down |
| LOC100131831 | AK129685     | uncharacterized LOC100131831                                | -2.1375268 down |
| FLJ25694     | AK127969     | uncharacterized protein FLJ25694                            | -7.518144 down  |
| SAMD5        | NM_001030060 | sterile alpha motif domain containing 5                     | -2.6627824 down |
| OR2M5        | NM_001004690 | olfactory receptor, family 2, subfamily M, member 5         | -5.429307 down  |
| TMEM52       | NM_178545    | transmembrane protein 52                                    | -2.336586 down  |
|              | AK125883     |                                                             | -2.1502578 down |
| FGF18        | NM_003862    | fibroblast growth factor 18                                 | -2.57209 down   |
| HOXB5        | NM_002147    | homeobox B5                                                 | -3.2419593 down |
| LOC731656    | NR_027454    | uncharacterized LOC731656                                   | -2.717006 down  |
| FAM59B       | NM_001191033 | family with sequence similarity 59, member B                | -2.231845 down  |
| MS4A15       | NM_001098835 | membrane-spanning 4-domains, subfamily A, member 15         | -2.134461 down  |
| FLT4         | NM_002020    | fms-related tyrosine kinase 4                               | -2.6600595 down |
| BAI2         | NM_001703    | brain-specific angiogenesis inhibitor 2                     | -2.055258 down  |
|              | AF416714     |                                                             | -2.80043 down   |
| CNTN2        | NM_005076    | contactin 2 (axonal)                                        | -4.524108 down  |
| SMAD5-AS1    | NR_026763    | SMAD5 antisense RNA 1 (non-protein coding)                  | -2.0423934 down |
| GPR133       | NM_198827    | G protein-coupled receptor 133                              | -3.0372365 down |
| SLC7A14      | NM_020949    | solute carrier family 7 (orphan transporter), member 14     | -2.4758465 down |
|              | CU687439     |                                                             | -2.1815228 down |
| COL4A1       | NM_001845    | collagen, type IV, alpha 1                                  | -4.864076 down  |
|              |              |                                                             | -2.1866405 down |
| ZC3H10       | NM_032786    | zinc finger CCCH-type containing 10                         | -2.6616583 down |
| TGFB2        | NM_003238    | transforming growth factor, beta 2                          | -2.0163758 down |
| LOC644662    | XM_933903    | uncharacterized LOC644662                                   | -2.0723808 down |
| C3orf20      | NM_032137    | chromosome 3 open reading frame 20                          | -3.0207899 down |
| SVOPL        | NM_174959    | SVOP-like                                                   | -2.2200868 down |
| PSMB7        |              | proteasome (prosome, macropain) subunit, beta type, 7       | -2.0117671 down |
| TMEM194B     |              | transmembrane protein 194B                                  | -2.1395192 down |

|               |              |                                                                |                 |
|---------------|--------------|----------------------------------------------------------------|-----------------|
| NEAT1         | AF001893     | nuclear paraspeckle assembly transcript 1 (non-protein coding) | -2.8376615 down |
| LOC441956     | XR_109656    | uncharacterized LOC441956                                      | -3.221395 down  |
| AHNAK2        | NM_138420    | AHNAK nucleoprotein 2                                          | -3.2539978 down |
| SELV          | NM_182704    | selenoprotein V                                                | -3.2637463 down |
| GYG2          | NM_001184703 | glycogenin 2                                                   | -2.4951386 down |
| C11orf95      | NM_001144936 | chromosome 11 open reading frame 95                            | -2.8758984 down |
| SSX4B         | NM_001034832 | synovial sarcoma, X breakpoint 4B                              | -5.78702 down   |
| TDRD3         | BC020604     | tudor domain containing 3                                      | -3.1269019 down |
| TOX2          | NM_032883    | TOX high mobility group box family member 2                    | -2.1438344 down |
| LOC100130865  | AK123130     | uncharacterized LOC100130865                                   | -3.081819 down  |
|               | AK093166     |                                                                | -2.3832526 down |
| MGC20647      | BC008289     | uncharacterized protein MGC20647                               | -3.140553 down  |
|               |              |                                                                | -2.009179 down  |
|               |              |                                                                | -3.9271653 down |
| LENG8         | NM_052925    | leukocyte receptor cluster (LRC) member 8                      | -2.405218 down  |
| MIXL1         | NM_031944    | Mix paired-like homeobox                                       | -2.4086452 down |
| CES3          | NM_024922    | carboxylesterase 3                                             | -3.7508008 down |
|               |              |                                                                | -5.4234653 down |
| CXorf38       | AL832829     | chromosome X open reading frame 38                             | -2.774094 down  |
| TSPAN8        | NM_004616    | tetraspanin 8                                                  | -2.351582 down  |
| LOC100289650  | NR_036584    | uncharacterized LOC100289650                                   | -5.134286 down  |
| HULC          | NR_004855    | highly up-regulated in liver cancer (non-protein coding)       | -2.8277068 down |
| CDKAL1        | NM_017774    | CDK5 regulatory subunit associated protein 1-like 1            | -2.3557155 down |
| CP            | NM_000096    | ceruloplasmin (ferroxidase)                                    | -2.0804539 down |
| TTC28-AS1     | NR_026963    | TTC28 antisense RNA 1 (non-protein coding)                     | -5.1564555 down |
|               |              |                                                                | -3.246623 down  |
| IGFL1         | NM_198541    | IGF-like family member 1                                       | -2.6515749 down |
| HES5          | NM_001010926 | hairy and enhancer of split 5 (Drosophila)                     | -4.611401 down  |
| MYO5B         | NM_001080467 | myosin VB                                                      | -2.735534 down  |
| LINC00302     | AF005082     | long intergenic non-protein coding RNA 302                     | -4.5198603 down |
| GORAB         | NM_001146039 | golgin, RAB6-interacting                                       | -2.1386724 down |
| RP11-165H20.1 | NR_003928    | CHIA-like pseudogene                                           | -2.6871252 down |
| LOC100129223  | XR_111243    | uncharacterized LOC100129223                                   | -3.0323548 down |
|               | BC064144     |                                                                | -2.941225 down  |
| SPRYD5        | NM_032681    | SPRY domain containing 5                                       | -3.7017303 down |
| FAM160B2      | NM_022749    | family with sequence similarity 160, member B2                 | -2.9236286 down |
| PRSS54        | NM_001080492 | protease, serine, 54                                           | -2.1586802 down |
| PBLD          | NM_001033083 | phenazine biosynthesis-like protein domain containing          | -2.2117817 down |
|               |              |                                                                | -3.143149 down  |
| TMEM44        | NM_001011655 | transmembrane protein 44                                       | -2.4158256 down |
|               |              |                                                                | -2.0613482 down |

|              |              |                                                        |                 |
|--------------|--------------|--------------------------------------------------------|-----------------|
|              |              |                                                        | -2.052461 down  |
| LOC730139    | BG168244     | uncharacterized LOC730139                              | -8.081863 down  |
| SGK494       | NM_001174103 | uncharacterized serine/threonine-protein kinase Sgk494 | -4.712771 down  |
| UGT1A6       | NM_001072    | UDP glucuronosyltransferase 1 family, polypeptide A6   | -2.7758641 down |
| LOC100130453 | AK123920     | uncharacterized LOC100130453                           | -3.266371 down  |
| RUFY4        | NM_198483    | RUN and FYVE domain containing 4                       | -4.517506 down  |
| ARHGAP35     | NM_004491    | Rho GTPase activating protein 35                       | -2.017066 down  |
| DEFT1P       | NR_036686    | defensin, theta 1 pseudogene                           | -2.2326682 down |
| TGIF1        |              | TGFB-induced factor homeobox 1                         | -6.2166343 down |
| CCDC144A     | NM_014695    | coiled-coil domain containing 144A                     | -2.1359017 down |
| FLJ37786     | XR_108343    | uncharacterized LOC642691                              | -2.85832 down   |
| FTCD         | NM_206965    | formiminotransferase cyclodeaminase                    | -2.718331 down  |
| ADAT2        | NM_182503    | adenosine deaminase, tRNA-specific 2                   | -2.2314584 down |
| TMEM25       | NM_032780    | transmembrane protein 25                               | -2.5767536 down |
| INPP5F       | NM_001243195 | inositol polyphosphate-5-phosphatase F                 | -2.517566 down  |
|              |              |                                                        | -4.5056696 down |
| ADAMTSL2     | NM_014694    | ADAMTS-like 2                                          | -2.3844516 down |
| MPDU1        | AK027742     | mannose-P-dolichol utilization defect 1                | -2.5096831 down |
|              |              |                                                        | -2.5572865 down |
| GSTM5        | NM_000851    | glutathione S-transferase mu 5                         | -2.880986 down  |
| ENDOV        | NM_001164638 | endonuclease V                                         | -2.1511707 down |
| LOC440742    | XR_110857    | uncharacterized LOC440742                              | -4.881606 down  |
| CCDC11       | NM_145020    | coiled-coil domain containing 11                       | -2.6664994 down |
| SPACA5       | NM_205856    | sperm acrosome associated 5                            | -3.5503838 down |
| PTPRG        | NM_002841    | protein tyrosine phosphatase, receptor type, G         | -2.7297883 down |
| LOC100131894 | AK092825     | uncharacterized LOC100131894                           | -3.298152 down  |
| HTR4         | NM_001040173 | 5-hydroxytryptamine (serotonin) receptor 4             | -2.7669418 down |
|              |              |                                                        | -2.4836795 down |
| ZNF763       | NM_001012753 | zinc finger protein 763                                | -2.4495506 down |
|              |              |                                                        | -2.4366586 down |
| LINC00222    | NR_033376    | long intergenic non-protein coding RNA 222             | -2.7653391 down |
| HIBCH        | NM_198047    | 3-hydroxyisobutyryl-CoA hydrolase                      | -2.5109205 down |
| LOC100130348 | AK124141     | uncharacterized LOC100130348                           | -2.9576893 down |
| KIAA1244     | NM_020340    | KIAA1244                                               | -2.0615048 down |
| LINC00263    | NR_026762    | long intergenic non-protein coding RNA 263             | -2.3385224 down |
|              | CR622587     |                                                        | -2.3800116 down |
|              |              |                                                        | -3.0835307 down |
|              | AK127957     |                                                        | -2.077758 down  |
|              | XR_110433    |                                                        | -3.4432583 down |
| ADAM21       | NM_003813    | ADAM metallopeptidase domain 21                        | -2.1352837 down |
| SHISA9       | NM_001145205 | shisa homolog 9 (Xenopus laevis)                       | -2.3256302 down |

|              |              |                                                                                                                                                          |                 |
|--------------|--------------|----------------------------------------------------------------------------------------------------------------------------------------------------------|-----------------|
| NR1D2        | BC070035     | nuclear receptor subfamily 1, group D, member 2                                                                                                          | -2.9418225 down |
|              | AK126625     |                                                                                                                                                          | -4.3313055 down |
| CHRNA5       | NM_000745    | cholinergic receptor, nicotinic, alpha 5                                                                                                                 | -3.8311088 down |
| GOLGA6A      | NM_001038640 | golgin A6 family, member A                                                                                                                               | -4.515959 down  |
| KRTAP4-1     | NM_033060    | keratin associated protein 4-1                                                                                                                           | -7.800764 down  |
| DEFB108B     | NM_001002035 | defensin, beta 108B                                                                                                                                      | -3.193814 down  |
| SLFN5        | NM_144975    | schlafen family member 5                                                                                                                                 | -2.7624593 down |
| RAMP1        | NM_005855    | receptor (G protein-coupled) activity modifying protein 1                                                                                                | -2.639751 down  |
| LOC727993    | AK090681     | uncharacterized LOC727993                                                                                                                                | -7.231693 down  |
| SH3GL1P3     | X99663       | SH3-domain GRB2-like 1 pseudogene 3                                                                                                                      | -2.930762 down  |
| NKAIN4       | NM_152864    | Na <sup>+</sup> /K <sup>+</sup> transporting ATPase interacting 4                                                                                        | -2.099535 down  |
| SLC3A1       | DQ023513     | solute carrier family 3 (cystine, dibasic and neutral amino acid transporters, activator of cystine, dibasic and neutral amino acid transport), member 1 | -2.5089746 down |
| PRRC2B       | NM_013318    | proline-rich coiled-coil 2B                                                                                                                              | -3.4010828 down |
| LOC646719    | XR_112726    | uncharacterized LOC646719                                                                                                                                | -2.1726642 down |
| CCDC104      | AK309764     | coiled-coil domain containing 104                                                                                                                        | -4.960236 down  |
|              | BC039333     |                                                                                                                                                          | -2.258889 down  |
| IFNW1        | NM_002177    | interferon, omega 1                                                                                                                                      | -2.479682 down  |
| DEDD         | AF064605     | death effector domain containing                                                                                                                         | -3.5773826 down |
| ZNF662       | NM_207404    | zinc finger protein 662                                                                                                                                  | -3.2179415 down |
| C1orf227     | NM_001024601 | chromosome 1 open reading frame 227                                                                                                                      | -2.218295 down  |
| LRRC49       | NM_017691    | leucine rich repeat containing 49                                                                                                                        | -2.1868796 down |
| MFSD9        | NM_032718    | major facilitator superfamily domain containing 9                                                                                                        | -2.0727165 down |
| C21orf88     | NR_026542    | chromosome 21 open reading frame 88                                                                                                                      | -2.2156951 down |
|              | AK055155     |                                                                                                                                                          | -2.4456036 down |
| RPRML        | NM_203400    | reprimin-like                                                                                                                                            | -2.5461533 down |
| PLA2G4F      | NM_213600    | phospholipase A2, group IVF                                                                                                                              | -3.569584 down  |
| TAS2R41      | NM_176883    | taste receptor, type 2, member 41                                                                                                                        | -2.5078769 down |
| TBX10        | NM_005995    | T-box 10                                                                                                                                                 | -2.1203413 down |
| CACNA2D1     | NM_000722    | calcium channel, voltage-dependent, alpha 2/delta subunit 1                                                                                              | -2.2805147 down |
| H2AFB2       | NM_001017991 | H2A histone family, member B2                                                                                                                            | -3.7219415 down |
|              | AK127935     |                                                                                                                                                          | -2.2251754 down |
| LOC100128563 | XR_132703    | uncharacterized LOC100128563                                                                                                                             | -2.5026765 down |
| MC3R         | NM_019888    | melanocortin 3 receptor                                                                                                                                  | -2.5158591 down |
| LOC440297    | NR_033579    | chondroitin sulfate proteoglycan 4 pseudogene                                                                                                            | -2.8473406 down |
| PTTG1P       | NM_004339    | pituitary tumor-transforming 1 interacting protein                                                                                                       | -2.2359407 down |
| MAN1A2       | NM_006699    | mannosidase, alpha, class 1A, member 2                                                                                                                   | -2.2242367 down |
| OR2B6        | NM_012367    | olfactory receptor, family 2, subfamily B, member 6                                                                                                      | -2.1525958 down |
| LBP          | NM_004139    | lipopolysaccharide binding protein                                                                                                                       | -2.1001062 down |
| CYP1A2       | NM_000761    | cytochrome P450, family 1, subfamily A, polypeptide 2                                                                                                    | -2.5994556 down |
| LOC286272    | AK093004     | uncharacterized LOC286272                                                                                                                                | -2.0242498 down |



|              |              |                                                                                                                                                          |                 |
|--------------|--------------|----------------------------------------------------------------------------------------------------------------------------------------------------------|-----------------|
|              | BC132839     |                                                                                                                                                          | -2.8446035 down |
|              |              |                                                                                                                                                          | -3.5111523 down |
| SPRED3       | NM_001039616 | sprouty-related, EVH1 domain containing 3                                                                                                                | -3.9820526 down |
|              | BC130558     |                                                                                                                                                          | -2.5987318 down |
| TARM1        | NM_001135686 | T cell-interacting, activating receptor on myeloid cells 1                                                                                               | -2.3951137 down |
|              | BG216262     |                                                                                                                                                          | -2.2752378 down |
| RAI1         | AJ271790     | retinoic acid induced 1                                                                                                                                  | -2.4362583 down |
| VCX2         | NM_016378    | variable charge, X-linked 2                                                                                                                              | -4.6333914 down |
|              | BE244176     |                                                                                                                                                          | -3.5649886 down |
| FLG          | NM_002016    | filaggrin                                                                                                                                                | -3.173141 down  |
|              |              |                                                                                                                                                          | -2.520661 down  |
| SLC17A6      | NM_020346    | solute carrier family 17 (sodium-dependent inorganic phosphate cotransporter), member 6                                                                  | -6.0544634 down |
| LACRT        | NM_033277    | lacritin                                                                                                                                                 | -2.9059248 down |
| LOC100126784 | NR_015384    | uncharacterized LOC100126784                                                                                                                             | -3.4552524 down |
| TRIP13       | NM_001166260 | thyroid hormone receptor interactor 13                                                                                                                   | -2.2269318 down |
| LOC100127909 | XR_111781    | uncharacterized LOC100127909                                                                                                                             | -3.1288 down    |
| DUSP8        | NM_004420    | dual specificity phosphatase 8                                                                                                                           | -2.5769916 down |
| LOC400548    | NR_033984    | uncharacterized LOC400548                                                                                                                                | -2.40036 down   |
|              |              |                                                                                                                                                          | -4.2483263 down |
| CSNK1A1P1    | NR_027320    | casein kinase 1, alpha 1 pseudogene 1                                                                                                                    | -2.1933153 down |
| LOC440297    | NR_033579    | chondroitin sulfate proteoglycan 4 pseudogene                                                                                                            | -2.009342 down  |
| ZNRF4        | NM_181710    | zinc and ring finger 4                                                                                                                                   | -3.69466 down   |
| OR2L8        | NM_001001963 | olfactory receptor, family 2, subfamily L, member 8                                                                                                      | -2.1067717 down |
| KRTAP1-5     | NM_031957    | keratin associated protein 1-5                                                                                                                           | -2.1074543 down |
| TMEM132A     | NM_017870    | transmembrane protein 132A                                                                                                                               | -2.3369367 down |
| LOC100131860 | AK097109     | uncharacterized LOC100131860                                                                                                                             | -2.086315 down  |
| SPRR2F       | NM_001014450 | small proline-rich protein 2F                                                                                                                            | -2.3916743 down |
|              |              |                                                                                                                                                          |                 |
| SLC3A1       | NM_000341    | solute carrier family 3 (cystine, dibasic and neutral amino acid transporters, activator of cystine, dibasic and neutral amino acid transport), member 1 | -9.613231 down  |
| BEST3        | AF440758     | bestrophin 3                                                                                                                                             | -3.3493996 down |
| TMEM35       | NM_021637    | transmembrane protein 35                                                                                                                                 | -4.691395 down  |
| OPN1MW       | NM_000513    | opsin 1 (cone pigments), medium-wave-sensitive                                                                                                           | -3.7852883 down |
| KLK2         | NM_001002231 | kallikrein-related peptidase 2                                                                                                                           | -3.8603814 down |
| NCKAP5L      | BC110599     | NCK-associated protein 5-like                                                                                                                            | -3.3476906 down |
| CAV1         | NM_001753    | caveolin 1, caveolae protein, 22kDa                                                                                                                      | -2.6581335 down |
| LOC285095    | XM_001722643 | uncharacterized LOC285095                                                                                                                                | -2.771608 down  |
| IQCH         | NM_001031715 | IQ motif containing H                                                                                                                                    | -2.1537576 down |
| FMO2         | NM_001460    | flavin containing monooxygenase 2 (non-functional)                                                                                                       | -2.3110301 down |
|              |              |                                                                                                                                                          | -2.2918015 down |
| CRYGN        | NM_144727    | crystallin, gamma N                                                                                                                                      | -2.383322 down  |

|              |              |                                                                                 |                 |
|--------------|--------------|---------------------------------------------------------------------------------|-----------------|
| HSD3B7       | NM_001142777 | hydroxy-delta-5-steroid dehydrogenase, 3 beta- and steroid delta-isomerase 7    | -2.4414687 down |
| TBX2         | NM_005994    | T-box 2                                                                         | -2.4387703 down |
| ALDOAP2      | M21191       | aldolase A, fructose-bisphosphate pseudogene 2                                  | -2.0807843 down |
|              |              |                                                                                 | -2.3149915 down |
| NRAP         | NM_198060    | nebulin-related anchoring protein                                               | -2.4597619 down |
| C6orf132     | NM_001164446 | chromosome 6 open reading frame 132                                             | -9.727346 down  |
| DNAH12       | NM_178504    | dynein, axonemal, heavy chain 12                                                | -2.3318284 down |
| ABCG8        | NM_022437    | ATP-binding cassette, sub-family G (WHITE), member 8                            | -4.009081 down  |
|              |              |                                                                                 | -3.3536286 down |
| ANKRD20A9P   | NR_027995    | ankyrin repeat domain 20 family, member A9, pseudogene                          | -2.7862835 down |
| MRO          | NM_031939    | maestro                                                                         | -2.1969876 down |
| RHBDD1       |              | rhomboid domain containing 1                                                    | -4.3730392 down |
|              | BX104084     |                                                                                 | -10.683768 down |
| FAM25A       | NM_001146157 | family with sequence similarity 25, member A                                    | -5.3189464 down |
| DPYSL5       | NM_020134    | dihydropyrimidinase-like 5                                                      | -3.9440286 down |
| LOC100509091 | XM_003403877 | uncharacterized LOC100509091                                                    | -2.1500516 down |
| SPACA5       | NM_205856    | sperm acrosome associated 5                                                     | -2.5995908 down |
| LOC644285    | AK126853     | uncharacterized LOC644285                                                       | -2.3458006 down |
| LDHAL6A      | NM_144972    | lactate dehydrogenase A-like 6A                                                 | -2.3466198 down |
| LOC100128857 | XR_132709    | beta-1,3-N-acetylgalactosaminyltransferase 1 (globoside blood group) pseudogene | -2.3515322 down |
| LOC100131000 | AK124361     | uncharacterized LOC100131000                                                    | -3.218077 down  |
|              |              |                                                                                 | -2.2598424 down |
| DHH          | NM_021044    | desert hedgehog                                                                 | -2.851316 down  |
| FLJ12825     | NR_026655    | uncharacterized LOC440101                                                       | -2.1450946 down |
| ZAR1         | NM_175619    | zygote arrest 1                                                                 | -4.3487625 down |
| RPL28        | NM_001136137 | ribosomal protein L28                                                           | -2.2861476 down |
|              |              |                                                                                 | -2.0454698 down |
| KRT6B        | NM_005555    | keratin 6B                                                                      | -2.2352533 down |
| PRSS55       | NM_198464    | protease, serine, 55                                                            | -3.3137004 down |
| SEC14L6      | NM_001193336 | SEC14-like 6 (S. cerevisiae)                                                    | -3.011952 down  |
| LOC728061    | AK025151     | hCG2003663                                                                      | -2.5644073 down |
| BTN2A3P      | NR_027795    | butyrophilin, subfamily 2, member A3, pseudogene                                | -2.238426 down  |
| FAM198A      | AK091001     | family with sequence similarity 198, member A                                   | -3.992717 down  |
| LOC100130849 | NR_038450    | phosphorylase kinase, gamma 1 (muscle) pseudogene                               | -3.8647861 down |
|              |              |                                                                                 | -4.554587 down  |
|              | AK096324     |                                                                                 | -2.1652827 down |
| OR14A16      | NM_001001966 | olfactory receptor, family 14, subfamily A, member 16                           | -2.6017656 down |
|              |              |                                                                                 | -2.4328039 down |
| FLJ46906     | NR_033896    | uncharacterized LOC441172                                                       | -2.533102 down  |
| LOC100128496 | CR738909     | uncharacterized LOC100128496                                                    | -2.1220982 down |

|              |              |                                                                                  |                 |
|--------------|--------------|----------------------------------------------------------------------------------|-----------------|
|              | DB066855     |                                                                                  | -5.1644583 down |
| INMT         | NM_001199219 | indolethylamine N-methyltransferase                                              | -2.257948 down  |
| SLC7A8       | NM_182728    | solute carrier family 7 (amino acid transporter light chain, L system), member 8 | -2.5715306 down |
| PKDCC        | AK311155     | protein kinase domain containing, cytoplasmic homolog (mouse)                    | -2.9054477 down |
| TAS2R19      | NM_176888    | taste receptor, type 2, member 19                                                | -2.273835 down  |
|              |              |                                                                                  | -3.831292 down  |
| ZNF81        | NM_007137    | zinc finger protein 81                                                           | -3.3331683 down |
|              |              |                                                                                  | -2.6774642 down |
| ZNF511       | AK091711     | zinc finger protein 511                                                          | -2.297694 down  |
|              | CR748640     |                                                                                  | -2.3447924 down |
|              |              |                                                                                  | -5.732493 down  |
|              | AK126080     |                                                                                  | -4.7672544 down |
|              |              |                                                                                  | -2.010095 down  |
| RAB43P1      | BM917410     | RAB43 pseudogene 1                                                               | -4.0891805 down |
| PPP1R14D     | NM_017726    | protein phosphatase 1, regulatory (inhibitor) subunit 14D                        | -2.2565925 down |
|              |              |                                                                                  | -9.106207 down  |
| ABI3BP       | NM_015429    | ABI family, member 3 (NESH) binding protein                                      | -2.7335498 down |
|              | AK127417     |                                                                                  | -2.0540762 down |
| CMIP         | NM_198390    | c-Maf inducing protein                                                           | -2.3066244 down |
|              |              |                                                                                  | -2.3209527 down |
|              | AL137562     |                                                                                  | -3.1207476 down |
| LOC100130857 | AK097050     | uncharacterized LOC100130857                                                     | -2.1709507 down |
| FLJ11710     | AK021772     | uncharacterized protein FLJ11710                                                 | -3.912566 down  |
| LOC100129098 | XM_001714893 | uncharacterized LOC100129098                                                     | -2.7728262 down |
| CPXM2        | NM_198148    | carboxypeptidase X (M14 family), member 2                                        | -3.7511039 down |
| CCDC103      | NM_213607    | coiled-coil domain containing 103                                                | -2.7786374 down |
| INO80        | NM_017553    | INO80 homolog (S. cerevisiae)                                                    | -2.2209868 down |
| AQP7P3       | NR_026558    | aquaporin 7 pseudogene 3                                                         | -2.6258645 down |
| PRRT2        | NM_145239    | proline-rich transmembrane protein 2                                             | -2.5783308 down |
| DNAJC5       | NM_025219    | DnaJ (Hsp40) homolog, subfamily C, member 5                                      | -2.2478328 down |
| LCNL1        | NM_207510    | lipocalin-like 1                                                                 | -3.0202014 down |
| CFHR1        | NM_002113    | complement factor H-related 1                                                    | -2.6748908 down |
| PRAMEF7      | NM_001012277 | PRAME family member 7                                                            | -2.3781807 down |
| CNTNAP4      | NM_138994    | contactin associated protein-like 4                                              | -2.8021007 down |
|              | AK097770     |                                                                                  | -2.039524 down  |
| OR5T3        | NM_001004747 | olfactory receptor, family 5, subfamily T, member 3                              | -2.5306466 down |
| HCN2         | NM_001194    | hyperpolarization activated cyclic nucleotide-gated potassium channel 2          | -2.650218 down  |
| RASA4        | NM_001079877 | RAS p21 protein activator 4                                                      | -2.1796172 down |
|              |              |                                                                                  | -2.3137233 down |
| MYCNOS       | NR_026766    | MYCN opposite strand/antisense RNA (non-protein coding)                          | -2.9692016 down |

|              |              |                                                                                     |                 |
|--------------|--------------|-------------------------------------------------------------------------------------|-----------------|
| SLC11A1      | NM_000578    | solute carrier family 11 (proton-coupled divalent metal ion transporters), member 1 | -2.4163134 down |
| ADAM19       | NM_033274    | ADAM metallopeptidase domain 19                                                     | -3.0050838 down |
| OR2H2        | NM_007160    | olfactory receptor, family 2, subfamily H, member 2                                 | -3.0151265 down |
| SOD3         | NM_003102    | superoxide dismutase 3, extracellular                                               | -2.8318462 down |
| AVP          | NM_000490    | arginine vasopressin                                                                | -3.2853966 down |
| MFSD6L       | NM_152599    | major facilitator superfamily domain containing 6-like                              | -3.7301908 down |
| LOC100131607 | XR_108637    | uncharacterized LOC100131607                                                        | -2.7394753 down |
|              | AK090928     |                                                                                     | -2.9178474 down |
| OR6C74       | NM_001005490 | olfactory receptor, family 6, subfamily C, member 74                                | -2.3116274 down |
| UNQ9370      | XR_111551    | IFMQ9370                                                                            | -6.3807073 down |
| AP4B1        | NM_006594    | adaptor-related protein complex 4, beta 1 subunit                                   | -2.28458 down   |
|              |              |                                                                                     | -2.7157795 down |
| SLC5A4       | NM_014227    | solute carrier family 5 (low affinity glucose cotransporter), member 4              | -2.34644 down   |
| LOC157860    | AK025743     | uncharacterized LOC157860                                                           | -2.5894132 down |
| CREB3L4      | NM_130898    | cAMP responsive element binding protein 3-like 4                                    | -2.0981402 down |
| PTPRG        | NM_002841    | protein tyrosine phosphatase, receptor type, G                                      | -2.2563598 down |
| PDE4DIP      |              | phosphodiesterase 4D interacting protein                                            | -3.227337 down  |
| TEX19        | NM_207459    | testis expressed 19                                                                 | -2.0959647 down |
| SOX13        | BC040649     | SRY (sex determining region Y)-box 13                                               | -2.0764039 down |
| SPC24        | NM_182513    | SPC24, NDC80 kinetochore complex component, homolog ( <i>S. cerevisiae</i> )        | -2.0852225 down |
| LINC00114    | AY204748     | long intergenic non-protein coding RNA 114                                          | -2.791678 down  |
| LOC100130354 | BC069735     | uncharacterized LOC100130354                                                        | -3.9027586 down |
| PSG5         | BG354573     | pregnancy specific beta-1-glycoprotein 5                                            | -3.4516673 down |
| FAM19A5      |              | family with sequence similarity 19 (chemokine (C-C motif)-like), member A5          | -2.7488794 down |
| C21orf58     | NM_058180    | chromosome 21 open reading frame 58                                                 | -2.3386693 down |
| FLJ10661     | NR_024361    | family with sequence similarity 86, member A pseudogene                             | -3.0564413 down |
|              |              |                                                                                     | -6.469771 down  |
| FAM84A       | NM_145175    | family with sequence similarity 84, member A                                        | -2.6488738 down |
|              |              |                                                                                     | -5.801462 down  |
| TMCO4        | NM_181719    | transmembrane and coiled-coil domains 4                                             | -2.375089 down  |
| C6orf58      | NM_001010905 | chromosome 6 open reading frame 58                                                  | -2.2836833 down |
| LOC100129917 | NR_036511    | uncharacterized LOC100129917                                                        | -2.1845236 down |
| SMC1B        | NM_148674    | structural maintenance of chromosomes 1B                                            | -2.4287293 down |
| OR13C4       | NM_001001919 | olfactory receptor, family 13, subfamily C, member 4                                | -2.8245487 down |
| IL20RA       | AK098312     | interleukin 20 receptor, alpha                                                      | -2.0692644 down |
| S100A5       | NM_002962    | S100 calcium binding protein A5                                                     | -3.9728982 down |
|              | DB511925     |                                                                                     | -3.0654693 down |
| GGT5         | NM_001099781 | gamma-glutamyltransferase 5                                                         | -2.857171 down  |
| GLIS3        | DQ438879     | GLIS family zinc finger 3                                                           | -3.84525 down   |
| LOC100131581 | AK092544     | uncharacterized LOC100131581                                                        | -6.2694902 down |

|              |                     |                                                                               |                 |
|--------------|---------------------|-------------------------------------------------------------------------------|-----------------|
|              | AK097463            |                                                                               | -2.0526426 down |
| NEK2         | NM_002497           | NIMA (never in mitosis gene a)-related kinase 2                               | -2.6656015 down |
| GPM6B        | NM_001001996        | glycoprotein M6B                                                              | -3.0386808 down |
| RP9P         | NR_003500           | retinitis pigmentosa 9 pseudogene                                             | -4.1858306 down |
|              | AF289562            |                                                                               | -2.5417893 down |
|              |                     |                                                                               | -2.1793094 down |
|              |                     |                                                                               | -2.4414911 down |
| PTGER3       | NM_198715           | prostaglandin E receptor 3 (subtype EP3)                                      | -2.3230703 down |
|              | XR_108734           |                                                                               | -3.5592332 down |
|              |                     |                                                                               | -4.4264274 down |
| CPNE9        | NM_153635           | copine family member IX                                                       | -2.8515382 down |
| DCLK1        | NM_004734           | doublecortin-like kinase 1                                                    | -4.0360823 down |
| WFIKKN2      | NM_175575           | WAP, follistatin/kazal, immunoglobulin, kunitz and netrin domain containing 2 | -2.9805276 down |
| MUC3         | AF007191            | intestinal mucin-like                                                         | -2.2538464 down |
| DNM3         | NM_001136127        | dynamin 3                                                                     | -2.1572034 down |
|              | CU692315            |                                                                               | -2.4623742 down |
| TBX1         | NM_080647           | T-box 1                                                                       | -3.7338393 down |
| WNK4         | NM_032387           | WNK lysine deficient protein kinase 4                                         | -2.4359827 down |
|              | DA067175            |                                                                               | -3.1556063 down |
| MFSD3        | NM_138431           | major facilitator superfamily domain containing 3                             | -2.2270577 down |
| FAM189A2     | NM_004816           | family with sequence similarity 189, member A2                                | -2.1782188 down |
| KRBOX1       | NM_001205272        | KRAB box domain containing 1                                                  | -2.0611854 down |
|              | 08-sep NM_001098811 | septin 8                                                                      | -2.7487297 down |
|              |                     |                                                                               | -3.4421222 down |
| LOC285740    | NR_027114           | uncharacterized LOC285740                                                     | -3.6962438 down |
| BMP3         | NM_001201           | bone morphogenetic protein 3                                                  | -4.1398873 down |
| KCNQ2        | NM_172109           | potassium voltage-gated channel, KQT-like subfamily, member 2                 | -2.9891136 down |
|              | BC051343            |                                                                               | -2.9513226 down |
| LOC100132197 | AK125954            | uncharacterized LOC100132197                                                  | -3.079703 down  |
| FAM138E      | NR_026819           | family with sequence similarity 138, member E                                 | -2.0997684 down |
| L3MBTL4      | NM_173464           | l(3)mbt-like 4 (Drosophila)                                                   | -2.481974 down  |
|              |                     |                                                                               | -3.3554232 down |
| TBCB         |                     | tubulin folding cofactor B                                                    | -2.6268542 down |
| CCDC114      | NM_144577           | coiled-coil domain containing 114                                             | -2.90382 down   |
| MAGEC3       | NM_138702           | melanoma antigen family C, 3                                                  | -3.0491858 down |
| FRAS1        | AK092082            | Fraser syndrome 1                                                             | -2.0997248 down |
| FBXO27       | NM_178820           | F-box protein 27                                                              | -3.283798 down  |
| GPR101       | NM_054021           | G protein-coupled receptor 101                                                | -2.0174198 down |
| LOC100131581 | AK092544            | uncharacterized LOC100131581                                                  | -4.8780975 down |
