# Supplementary material for: Transcriptional signature associated with early rheumatoid arthritis and healthy individuals at high risk to develop the disease
Source: PubMed Central journal article supplement (PMC5870959; doi:10.1371/journal.pone.0194205), 2018-03-27
Supplement: pone.0194205.s004.pdf [file pone.0194205.s004.pdf]

**Supplementary Table 4. Up regulated genes in relatives with ACCP+ vs relatives ACCP-**

| Gene Symbol  | Genbank Accession | Gene Name                                                           | Fold Change | Regulation |
|--------------|-------------------|---------------------------------------------------------------------|-------------|------------|
| LOC100288292 | XR_132538         | putative uncharacterized protein FLJ44672-like                      | 2.789923    | up         |
| CAV1         | NM_001753         | caveolin 1, caveolae protein, 22kDa                                 | 3.946695    | up         |
| CCDC129      |                   | coiled-coil domain containing 129                                   | 2.1985881   | up         |
| ABTB1        | NM_032548         | ankyrin repeat and BTB (POZ) domain containing 1                    | 2.2613204   | up         |
| WSCD2        | NM_014653         | WSC domain containing 2                                             | 2.075865    | up         |
| PPP1R14A     | NM_033256         | protein phosphatase 1, regulatory (inhibitor) subunit 14A           | 2.6415465   | up         |
| ATP6V0D1     | NM_004691         | ATPase, H+ transporting, lysosomal 38kDa, V0 subunit d1             | 2.4900744   | up         |
| KCNK15       | NM_022358         | potassium channel, subfamily K, member 15                           | 2.2245746   | up         |
| SP2          | NM_003110         | Sp2 transcription factor                                            | 2.6386456   | up         |
| KIAA0319L    | NM_024874         | KIAA0319-like                                                       | 2.1558642   | up         |
| C19orf59     | NM_174918         | chromosome 19 open reading frame 59                                 | 2.3626502   | up         |
| SCARF2       | NM_153334         | scavenger receptor class F, member 2                                | 2.360706    | up         |
| Unknown      |                   |                                                                     | 2.6564271   | up         |
| ACBD4        | NM_024722         | acyl-CoA binding domain containing 4                                | 2.818159    | up         |
| NARF         | NM_001038618      | nuclear prelamin A recognition factor                               | 2.008297    | up         |
|              | AK094541          |                                                                     | 2.4117448   | up         |
| PCP4         | NM_006198         | Purkinje cell protein 4                                             | 2.489627    | up         |
| CIC          | NM_015125         | capicua homolog (Drosophila)                                        | 2.3857553   | up         |
|              | AK098147          |                                                                     | 4.7182083   | up         |
| IL1R2        | NM_004633         | interleukin 1 receptor, type II                                     | 2.1484475   | up         |
| KRTAP10-8    | NM_198695         | keratin associated protein 10-8                                     | 2.4531016   | up         |
| TARP         | NM_001003799      | TCR gamma alternate reading frame protein                           | 2.415881    | up         |
| TUBA3D       | NM_080386         | tubulin, alpha 3d                                                   | 2.273618    | up         |
| LOC283547    | NR_039982         | uncharacterized LOC283547                                           | 2.015791    | up         |
| RNASET2      | AK001769          | ribonuclease T2                                                     | 4.057167    | up         |
| ZNF24        | NM_006965         | zinc finger protein 24                                              | 3.4035223   | up         |
| LOC389834    | NR_027420         | ankyrin repeat domain 57 pseudogene                                 | 2.7860982   | up         |
| LOC100132247 | NM_001135865      | nuclear pore complex interacting protein related gene               | 2.1316926   | up         |
| PARP12       | NM_022750         | poly (ADP-ribose) polymerase family, member 12                      | 2.4150546   | up         |
| SH3BP4       | NM_014521         | SH3-domain binding protein 4                                        | 2.079753    | up         |
| DDX3Y        | NM_001122665      | DEAD (Asp-Glu-Ala-Asp) box polypeptide 3, Y-linked                  | 2.0400486   | up         |
| SIK1         | NM_173354         | salt-inducible kinase 1                                             | 2.1804388   | up         |
| CSN1S1       | NM_001890         | casein alpha s1                                                     | 2.5260406   | up         |
| ACSL1        | NM_001995         | acyl-CoA synthetase long-chain family member 1                      | 2.0690696   | up         |
| MCOLN3       | NM_018298         | mucolipin 3                                                         | 3.3666747   | up         |
| LOC100129931 | NR_033828         | uncharacterized LOC100129931                                        | 10.931081   | up         |
| Unknown      |                   |                                                                     | 2.0839288   | up         |
| ND3          | AY423734          | NADH dehydrogenase, subunit 3 (complex I)                           | 2.6191425   | up         |
| LCE1A        | NM_178348         | late cornified envelope 1A                                          | 2.3914135   | up         |
| APOBEC3C     | NM_014508         | apolipoprotein B mRNA editing enzyme, catalytic polypeptide-like 3C | 2.0509124   | up         |

|            |              |                                                                                  |              |
|------------|--------------|----------------------------------------------------------------------------------|--------------|
| LOC400662  | AK055411     | uncharacterized LOC400662                                                        | 3.3198295 up |
| ARAP1      | NM_001040118 | ArfGAP with RhoGAP domain, ankyrin repeat and PH domain 1                        | 2.3279066 up |
| TNXB       | NM_019105    | tenascin XB                                                                      | 2.3959095 up |
| SPOCK2     | NM_001134434 | sparc/osteonectin, cwcv and kazal-like domains proteoglycan (testican) 2         | 2.3886817 up |
| TIPRL      | NM_152902    | TIP41, TOR signaling pathway regulator-like ( <i>S. cerevisiae</i> )             | 2.6131291 up |
| ZFP36L1    | AK097098     | zinc finger protein 36, C3H type-like 1                                          | 2.0590303 up |
| CPSF3L     | NM_017871    | cleavage and polyadenylation specific factor 3-like                              | 3.3125765 up |
| ACSS2      | NM_018677    | acyl-CoA synthetase short-chain family member 2                                  | 2.2859967 up |
| SLC12A9    | NM_020246    | solute carrier family 12 (potassium/chloride transporters), member 9             | 2.2835226 up |
| PLEKHG5    | NM_198681    | pleckstrin homology domain containing, family G (with RhoGef domain) member 5    | 2.0799766 up |
| ARHGEF16   | NM_014448    | Rho guanine nucleotide exchange factor (GEF) 16                                  | 2.4696991 up |
| TLE4       | NM_007005    | transducin-like enhancer of split 4 (E(sp1) homolog, <i>Drosophila</i> )         | 2.0882056 up |
| HPS1       | NM_000195    | Hermansky-Pudlak syndrome 1                                                      | 2.6783736 up |
| ACTN4      | NM_004924    | actinin, alpha 4                                                                 | 2.3923786 up |
| MORN1      |              | MORN repeat containing 1                                                         | 2.925553 up  |
| ACAP3      | NM_030649    | ArfGAP with coiled-coil, ankyrin repeat and PH domains 3                         | 2.5301104 up |
| Unknown    |              |                                                                                  | 2.5941215 up |
| COL27A1    | NM_032888    | collagen, type XXVII, alpha 1                                                    | 2.9623253 up |
| CYP4F30P   | NR_023391    | cytochrome P450, family 4, subfamily F, polypeptide 30, pseudogene               | 4.3726916 up |
| LOC647086  | XR_132608    | chromosome 20 open reading frame 27 pseudogene                                   | 2.084827 up  |
| Unknown    |              |                                                                                  | 2.1183016 up |
| STAT3      | NM_213662    | signal transducer and activator of transcription 3 (acute-phase response factor) | 2.6298807 up |
| KRTAP10-12 | NM_198699    | keratin associated protein 10-12                                                 | 3.3742194 up |
| AHSG       | NM_001622    | alpha-2-HS-glycoprotein                                                          | 2.4957964 up |
| ACAP1      | NM_014716    | ArfGAP with coiled-coil, ankyrin repeat and PH domains 1                         | 2.449008 up  |
| PORCN      | NM_203473    | porcupine homolog ( <i>Drosophila</i> )                                          | 3.0370867 up |
|            | DR731407     |                                                                                  | 4.1535273 up |
| USP5       | NM_003481    | ubiquitin specific peptidase 5 (isopeptidase T)                                  | 2.2778535 up |
| RLTPR      | NM_001013838 | RGD motif, leucine rich repeats, tropomodulin domain and proline-rich containing | 2.5468485 up |
| H3F3B      | NM_005324    | H3 histone, family 3B (H3.3B)                                                    | 2.164711 up  |
| LOC729305  | XR_132809    | uncharacterized LOC729305                                                        | 4.0573115 up |
| FOXB1      | NM_012182    | forkhead box B1                                                                  | 2.3309827 up |
| GDI1       | NM_001493    | GDP dissociation inhibitor 1                                                     | 2.2780993 up |
| DPYSL4     | NM_006426    | dihydropyrimidinase-like 4                                                       | 2.5227687 up |
| Unknown    |              |                                                                                  | 4.7101107 up |
| MAP1LC3A   | NM_032514    | microtubule-associated protein 1 light chain 3 alpha                             | 3.7433934 up |
| RAB1B      | NM_030981    | RAB1B, member RAS oncogene family                                                | 2.3512714 up |
|            | AK097701     |                                                                                  | 2.2802246 up |
| LOC143188  | NR_015409    | uncharacterized LOC143188                                                        | 2.7468412 up |
| USP21      | NM_001014443 | ubiquitin specific peptidase 21                                                  | 2.651004 up  |
| HMGA2      | NM_003484    | high mobility group AT-hook 2                                                    | 3.1459346 up |
| ST7        | NM_018412    | suppression of tumorigenicity 7                                                  | 2.0580974 up |

|              |              |                                                                |              |
|--------------|--------------|----------------------------------------------------------------|--------------|
| GPR15        | NM_005290    | G protein-coupled receptor 15                                  | 2.6640446 up |
| GABARAP      | NM_007278    | GABA(A) receptor-associated protein                            | 2.1371005 up |
| CHKB         | NM_005198    | choline kinase beta                                            | 2.2299933 up |
| CD3E         | NM_000733    | CD3e molecule, epsilon (CD3-TCR complex)                       | 2.1550918 up |
| NSUN4        | NM_199044    | NOP2/Sun domain family, member 4                               | 2.6492007 up |
| LOC100652762 | XM_003403544 | uncharacterized LOC100652762                                   | 2.0573764 up |
| FAM65A       | NM_024519    | family with sequence similarity 65, member A                   | 3.2714615 up |
| BPIFB2       | NM_025227    | BPI fold containing family B, member 2                         | 4.1397 up    |
| INPPL1       | NM_001567    | inositol polyphosphate phosphatase-like 1                      | 2.0888195 up |
| SIRT2        | NM_012237    | sirtuin 2                                                      | 2.4678743 up |
| Unknown      |              |                                                                | 2.8905916 up |
| KRTAP5-11    |              | keratin associated protein 5-11                                | 2.0622194 up |
| LINC00494    | NR_026958    | long intergenic non-protein coding RNA 494                     | 3.0265074 up |
| LOC401357    | XR_132811    | uncharacterized LOC401357                                      | 2.5916228 up |
| MON1B        | NM_014940    | MON1 homolog B (yeast)                                         | 2.590523 up  |
|              | AY010113     |                                                                | 2.2281902 up |
| CYC1         | NM_001916    | cytochrome c-1                                                 | 2.0117774 up |
| NPPA         |              | natriuretic peptide A                                          | 2.9338233 up |
| EIF1AY       | NM_004681    | eukaryotic translation initiation factor 1A, Y-linked          | 5.6645055 up |
|              | BE266556     |                                                                | 2.068938 up  |
| TMEM151B     | NM_001137560 | transmembrane protein 151B                                     | 2.4972787 up |
| LINC00106    | BQ009527     | long intergenic non-protein coding RNA 106                     | 2.212271 up  |
| AKT1         | NM_005163    | v-akt murine thymoma viral oncogene homolog 1                  | 2.404629 up  |
| SMAP2        | NM_022733    | small ArfGAP2                                                  | 2.2495065 up |
| REREP3       | NR_033735    | arginine-glutamic acid dipeptide (RE) repeats pseudogene 3     | 3.242693 up  |
| Unknown      |              |                                                                | 2.3068695 up |
| CT47A11      | NM_173571    | cancer/testis antigen family 47, member A11                    | 2.8958516 up |
| Unknown      |              |                                                                | 2.2935717 up |
| EPHX3        | NM_024794    | epoxide hydrolase 3                                            | 2.7596948 up |
| C1orf198     | NM_032800    | chromosome 1 open reading frame 198                            | 2.0539234 up |
|              | XM_003118719 |                                                                | 2.7333615 up |
| ACHE         | NM_000665    | acetylcholinesterase                                           | 2.6459744 up |
| Unknown      |              |                                                                | 2.1197147 up |
| NASP         | NM_002482    | nuclear autoantigenic sperm protein (histone-binding)          | 3.7578866 up |
| NIP7         | NM_016101    | nuclear import 7 homolog (S. cerevisiae)                       | 3.1747224 up |
| COX1         | AK074742     | cytochrome c oxidase subunit I                                 | 2.3615606 up |
| LOC100131150 | AK096194     | uncharacterized LOC100131150                                   | 2.1258461 up |
| AUP1         | NM_181575    | ancient ubiquitous protein 1                                   | 2.105954 up  |
| TMEM219      | NM_194280    | transmembrane protein 219                                      | 2.1054459 up |
| MESTIT1      | NR_004382    | MEST intronic transcript 1, antisense RNA (non-protein coding) | 2.8080826 up |
| MOV10L1      | NM_018995    | Mov10l1, Moloney leukemia virus 10-like 1, homolog (mouse)     | 2.9715996 up |
| LOC100130238 | NR_024563    | uncharacterized LOC100130238                                   | 2.1249104 up |

|                |              |                                                                   |              |
|----------------|--------------|-------------------------------------------------------------------|--------------|
| LOC645261      | AF258587     | PP565                                                             | 3.8613176 up |
| FAM100A        | NM_145253    | family with sequence similarity 100, member A                     | 2.6317227 up |
| ZNF205         | NM_003456    | zinc finger protein 205                                           | 3.350588 up  |
| OR5V1          | NM_030876    | olfactory receptor, family 5, subfamily V, member 1               | 2.0663216 up |
| WNT10A         | NM_025216    | wingless-type MMTV integration site family, member 10A            | 2.2642982 up |
| HNRNPUL1       | NM_007040    | heterogeneous nuclear ribonucleoprotein U-like 1                  | 2.525899 up  |
|                | DA197111     |                                                                   | 2.4724066 up |
| GUK1           | NM_001242840 | guanylate kinase 1                                                | 2.5769215 up |
| ZNF266         | NM_006631    | zinc finger protein 266                                           | 2.2760646 up |
| NKAIN2         | NM_001040214 | Na <sup>+</sup> /K <sup>+</sup> transporting ATPase interacting 2 | 2.0606914 up |
| HMG20B         | NM_006339    | high mobility group 20B                                           | 2.4731197 up |
| HSP90B1        | NM_003299    | heat shock protein 90kDa beta (Grp94), member 1                   | 2.1757808 up |
| TRAM2          | NM_012288    | translocation associated membrane protein 2                       | 3.66912 up   |
| P4HTM          | NM_177938    | prolyl 4-hydroxylase, transmembrane (endoplasmic reticulum)       | 2.2450502 up |
| TMPRSS9        | NM_182973    | transmembrane protease, serine 9                                  | 3.1652484 up |
| RHBDL1         | NM_003961    | rhomoid, veinlet-like 1 (Drosophila)                              | 2.7976906 up |
| FRMD1          | NM_024919    | FERM domain containing 1                                          | 3.5627968 up |
| Unknown        |              |                                                                   | 2.4173417 up |
| MRPL45         | NM_032351    | mitochondrial ribosomal protein L45                               | 2.4917097 up |
| IFITM3         | NM_021034    | interferon induced transmembrane protein 3                        | 2.0669284 up |
| LALBA          | NM_002289    | lactalbumin, alpha-                                               | 7.8349533 up |
| OAS1           | NM_002534    | 2'-5'-oligoadenylate synthetase 1, 40/46kDa                       | 2.666262 up  |
| CLPTM1         | NM_001294    | cleft lip and palate associated transmembrane protein 1           | 2.178986 up  |
| FLJ14186       | NR_037596    | uncharacterized LOC401149                                         | 2.880895 up  |
| KRTAP5-4       | NM_001012709 | keratin associated protein 5-4                                    | 2.263062 up  |
| ARHGAP40       | NM_001164431 | Rho GTPase activating protein 40                                  | 2.3690147 up |
| CAMK2G         | NM_172171    | calcium/calmodulin-dependent protein kinase II gamma              | 2.0102026 up |
| FAM108A1       | NM_001130111 | family with sequence similarity 108, member A1                    | 2.0615745 up |
| NSUN5          | NM_148956    | NOP2/Sun domain family, member 5                                  | 2.051235 up  |
| C18orf12       | XR_109479    | chromosome 18 open reading frame 12                               | 2.4328592 up |
| CMTM7          | NM_138410    | CKLF-like MARVEL transmembrane domain containing 7                | 3.5308428 up |
|                | AK126423     |                                                                   | 2.4049344 up |
|                | BC166633     |                                                                   | 2.3559139 up |
| KCTD19         | NM_001100915 | potassium channel tetramerisation domain containing 19            | 3.0291438 up |
| FAM73B         | NM_032809    | family with sequence similarity 73, member B                      | 2.0745895 up |
| ATG4B          | NM_013325    | ATG4 autophagy related 4 homolog B (S. cerevisiae)                | 3.0301833 up |
| RBAK-LOC389458 | NM_001204513 | RBAK-LOC389458 readthrough                                        | 2.9922888 up |
| CMA1           | NM_001836    | chymase 1, mast cell                                              | 2.499754 up  |
| OSCAR          | NM_206818    | osteoclast associated, immunoglobulin-like receptor               | 2.6062565 up |
|                | BF515046     |                                                                   | 2.459267 up  |
| ZFP41          | NM_173832    | zinc finger protein 41 homolog (mouse)                            | 5.1692195 up |
| TMEM189        | NM_199129    | transmembrane protein 189                                         | 2.7031746 up |

|           |              |                                                                                    |              |
|-----------|--------------|------------------------------------------------------------------------------------|--------------|
| AMN       | NM_030943    | amniotless homolog (mouse)                                                         | 2.6318595 up |
| Unknown   |              |                                                                                    | 2.2459526 up |
| STX5      | NM_003164    | syntaxin 5                                                                         | 2.0274286 up |
| PRDX5     | NM_012094    | peroxiredoxin 5                                                                    | 2.0816474 up |
| C19orf29  | NM_021231    | chromosome 19 open reading frame 29                                                | 2.722241 up  |
| CRLF1     | NM_004750    | cytokine receptor-like factor 1                                                    | 2.3008592 up |
| ARHGEF10  | BC040474     | Rho guanine nucleotide exchange factor (GEF) 10                                    | 2.261707 up  |
| ENTPD6    | NM_001247    | ectonucleoside triphosphate diphosphohydrolase 6 (putative)                        | 2.2502723 up |
| POLR2J4   | NR_003655    | polymerase (RNA) II (DNA directed) polypeptide J4, pseudogene                      | 2.494902 up  |
| MLLT11    | NM_006818    | myeloid/lymphoid or mixed-lineage leukemia (trithorax homolog, Drosophila); transl | 2.338549 up  |
| TCOF1     | NM_001008657 | Treacher Collins-Franceschetti syndrome 1                                          | 3.5125248 up |
| SPATA2L   | NM_152339    | spermatogenesis associated 2-like                                                  | 2.2859683 up |
| SCGB3A2   | NM_054023    | secretoglobin, family 3A, member 2                                                 | 3.76579 up   |
| C8orf58   | NM_001013842 | chromosome 8 open reading frame 58                                                 | 2.2809741 up |
| VMO1      | NM_182566    | vitelline membrane outer layer 1 homolog (chicken)                                 | 2.418349 up  |
| HIST1H2BN | NM_003520    | histone cluster 1, H2bn                                                            | 2.3483684 up |
| EFNA1     | NM_004428    | ephrin-A1                                                                          | 3.2253997 up |
| SLC34A1   | NM_003052    | solute carrier family 34 (sodium phosphate), member 1                              | 2.3626764 up |
| CORO1A    | NM_007074    | coronin, actin binding protein, 1A                                                 | 2.4794939 up |
| DHRS13    | NM_144683    | dehydrogenase/reductase (SDR family) member 13                                     | 2.491425 up  |
| RPP25     | NM_017793    | ribonuclease P/MRP 25kDa subunit                                                   | 2.4927213 up |
| IL32      | NM_001012631 | interleukin 32                                                                     | 2.104205 up  |
| GPR97     | NM_170776    | G protein-coupled receptor 97                                                      | 2.0263214 up |
| KCP       | NM_001135914 | kielin/chordin-like protein                                                        | 2.9855702 up |
| Unknown   |              |                                                                                    | 2.128056 up  |
| GNG8      | NM_033258    | guanine nucleotide binding protein (G protein), gamma 8                            | 2.0878649 up |
| CDX1      | NM_001804    | caudal type homeobox 1                                                             | 4.2568593 up |
| OR10H2    | NM_013939    | olfactory receptor, family 10, subfamily H, member 2                               | 2.1559143 up |
| PQLC3     | NM_152391    | PQ loop repeat containing 3                                                        | 3.0017273 up |
| BLOC1S1   | NM_001487    | biogenesis of lysosomal organelles complex-1, subunit 1                            | 2.6000597 up |
| S100A11   | NM_005620    | S100 calcium binding protein A11                                                   | 2.9087212 up |
| LOC646743 | NR_033930    | uncharacterized LOC646743                                                          | 4.124948 up  |
| PNPLA2    | NM_020376    | patatin-like phospholipase domain containing 2                                     | 2.6759987 up |
| FMO5      | NM_001461    | flavin containing monooxygenase 5                                                  | 2.0558357 up |
| Unknown   |              |                                                                                    | 3.1459734 up |
| LOC339807 | NR_034023    | uncharacterized LOC339807                                                          | 2.0697885 up |
| LSS       | NM_002340    | lanosterol synthase (2,3-oxidosqualene-lanosterol cyclase)                         | 2.2321827 up |
| Unknown   |              |                                                                                    | 2.0370793 up |
| ZNF703    | NM_025069    | zinc finger protein 703                                                            | 2.1090167 up |
| APBB3     | NM_006051    | amyloid beta (A4) precursor protein-binding, family B, member 3                    | 2.0174665 up |
| ERGIC3    | NM_015966    | ERGIC and golgi 3                                                                  | 2.0251486 up |
| CD37      | NM_001774    | CD37 molecule                                                                      | 2.4798875 up |

|           |              |                                                                                      |              |
|-----------|--------------|--------------------------------------------------------------------------------------|--------------|
| DUSP8     | NM_004420    | dual specificity phosphatase 8                                                       | 2.4004533 up |
| ALDH3B1   | NM_001161473 | aldehyde dehydrogenase 3 family, member B1                                           | 2.4100623 up |
| TMUB2     | NM_177441    | transmembrane and ubiquitin-like domain containing 2                                 | 2.2567334 up |
| Unknown   |              |                                                                                      | 3.281102 up  |
| F13A1     | NM_000129    | coagulation factor XIII, A1 polypeptide                                              | 2.5725837 up |
| AGPAT3    | NM_020132    | 1-acylglycerol-3-phosphate O-acyltransferase 3                                       | 2.2452831 up |
| TTY15     | NR_001545    | testis-specific transcript, Y-linked 15 (non-protein coding)                         | 2.273323 up  |
| ASNA1     | NM_004317    | arsA arsenite transporter, ATP-binding, homolog 1 (bacterial)                        | 2.1891809 up |
| COL6A2    | NM_058174    | collagen, type VI, alpha 2                                                           | 2.97253 up   |
| TMCO6     | NM_018502    | transmembrane and coiled-coil domains 6                                              | 2.09654 up   |
| AK1       | NM_000476    | adenylate kinase 1                                                                   | 2.3696666 up |
| TMEM40    | NM_018306    | transmembrane protein 40                                                             | 2.4684763 up |
| MAEA      | NM_001017405 | macrophage erythroblast attacher                                                     | 2.2102544 up |
| CERS3     | NM_178842    | ceramide synthase 3                                                                  | 2.8725007 up |
| HTRA2     | NM_145074    | HtrA serine peptidase 2                                                              | 2.392647 up  |
| FBXL17    | NM_001163315 | F-box and leucine-rich repeat protein 17                                             | 3.862536 up  |
| GPX1      | NM_201397    | glutathione peroxidase 1                                                             | 2.6742394 up |
| POLR2C    | NM_032940    | polymerase (RNA) II (DNA directed) polypeptide C, 33kDa                              | 2.3571212 up |
| C16orf7   | NM_004913    | chromosome 16 open reading frame 7                                                   | 2.50614 up   |
| FTL       | NM_000146    | ferritin, light polypeptide                                                          | 2.1800663 up |
| OR11A1    | NM_013937    | olfactory receptor, family 11, subfamily A, member 1                                 | 3.688992 up  |
| ASB16     | NM_080863    | ankyrin repeat and SOCS box containing 16                                            | 2.987806 up  |
| ATP6V0B   | NM_004047    | ATPase, H+ transporting, lysosomal 21kDa, V0 subunit b                               | 2.1722252 up |
| FLJ34208  | NR_033929    | uncharacterized LOC401106                                                            | 3.5345564 up |
| SH3GL1    | NM_003025    | SH3-domain GRB2-like 1                                                               | 2.5025542 up |
| FBXL6     | NM_012162    | F-box and leucine-rich repeat protein 6                                              | 2.7470727 up |
| TNIP1     | NM_006058    | TNFAIP3 interacting protein 1                                                        | 2.1397786 up |
| FTL       | NM_000146    | ferritin, light polypeptide                                                          | 2.0166714 up |
| ZNF282    | NM_003575    | zinc finger protein 282                                                              | 3.1631253 up |
| TMEM146   | NM_152784    | transmembrane protein 146                                                            | 2.2819207 up |
| BCKDK     | NM_005881    | branched chain ketoacid dehydrogenase kinase                                         | 2.3312452 up |
| KIFC2     | NM_145754    | kinesin family member C2                                                             | 2.4249732 up |
| GNB1      | NM_002074    | guanine nucleotide binding protein (G protein), beta polypeptide 1                   | 2.0907006 up |
| ITGAL     | NM_002209    | integrin, alpha L (antigen CD11A (p180), lymphocyte function-associated antigen 1; a | 2.0606594 up |
| MICU1     | NM_006077    | mitochondrial calcium uptake 1                                                       | 2.126319 up  |
| FCER1G    | NM_004106    | Fc fragment of IgE, high affinity I, receptor for; gamma polypeptide                 | 2.0405056 up |
| SHISA4    | NM_198149    | shisa homolog 4 (Xenopus laevis)                                                     | 2.6683297 up |
| SLC26A11  | NM_001166347 | solute carrier family 26, member 11                                                  | 3.1420128 up |
| LOC390660 | XR_109177    | FLJ00317 protein                                                                     | 2.6243894 up |
| LYL1      | NM_005583    | lymphoblastic leukemia derived sequence 1                                            | 2.8418229 up |
|           |              |                                                                                      | 2.385252 up  |
| CDCA4     | NM_017955    | cell division cycle associated 4                                                     | 2.8596375 up |

|           |              |                                                                                         |              |
|-----------|--------------|-----------------------------------------------------------------------------------------|--------------|
| C2CD4C    | NM_001136263 | C2 calcium-dependent domain containing 4C                                               | 3.567688 up  |
| AP2B1     | NM_001030006 | adaptor-related protein complex 2, beta 1 subunit                                       | 2.070988 up  |
| ARMC6     | NM_033415    | armadillo repeat containing 6                                                           | 2.8686852 up |
| EVX1      | NM_001989    | even-skipped homeobox 1                                                                 | 2.6414528 up |
|           | BC033227     |                                                                                         | 2.5524182 up |
| PARVG     | NM_022141    | parvin, gamma                                                                           | 2.0445724 up |
| SLC14A1   | NM_001146037 | solute carrier family 14 (urea transporter), member 1 (Kidd blood group)                | 2.0789602 up |
| DVL2      | NM_004422    | dishevelled, dsh homolog 2 (Drosophila)                                                 | 2.0782108 up |
| GAS7      | NM_201433    | growth arrest-specific 7                                                                | 2.1753223 up |
| CISD3     | NM_001136498 | CDGSH iron sulfur domain 3                                                              | 2.2889295 up |
| ZMYND8    | NM_183047    | zinc finger, MYND-type containing 8                                                     | 2.519038 up  |
| LRRC33    | NM_198565    | leucine rich repeat containing 33                                                       | 2.1911287 up |
| CSF1      | NM_172212    | colony stimulating factor 1 (macrophage)                                                | 2.5548365 up |
| RHBDD2    | NM_001040457 | rhomoid domain containing 2                                                             | 2.2276585 up |
| DUSP4     | NM_001394    | dual specificity phosphatase 4                                                          | 3.9018173 up |
| NXF1      | NM_006362    | nuclear RNA export factor 1                                                             | 2.2717564 up |
| NPB       | NM_148896    | neuropeptide B                                                                          | 2.888444 up  |
| Unknown   |              |                                                                                         | 2.6223218 up |
| AGBL3     | NM_178563    | ATP/GTP binding protein-like 3                                                          | 2.486592 up  |
| ALG1      | NM_019109    | asparagine-linked glycosylation 1, beta-1,4-mannosyltransferase homolog (S. cerevisiae) | 2.02872 up   |
| SSH1      | NM_001161331 | slingshot homolog 1 (Drosophila)                                                        | 2.13739 up   |
| LTK       | NM_002344    | leukocyte receptor tyrosine kinase                                                      | 2.1800156 up |
| SH3GLB2   | NM_020145    | SH3-domain GRB2-like endophilin B2                                                      | 2.5247235 up |
| ALKBH5    | NM_017758    | alkB, alkylation repair homolog 5 (E. coli)                                             | 2.9174528 up |
| SYTL1     | NM_032872    | synaptotagmin-like 1                                                                    | 2.5048254 up |
| NOA1      | NM_032313    | nitric oxide associated 1                                                               | 2.5846655 up |
| SREBF1    | NM_001005291 | sterol regulatory element binding transcription factor 1                                | 2.2380853 up |
| Unknown   |              |                                                                                         | 2.786228 up  |
| DOT1L     | AB058717     | DOT1-like, histone H3 methyltransferase (S. cerevisiae)                                 | 3.5372963 up |
| MYH14     | NM_001077186 | myosin, heavy chain 14, non-muscle                                                      | 2.6250458 up |
| NOTO      | NM_001134462 | notochord homeobox                                                                      | 3.2267942 up |
| VWA1      | NM_022834    | von Willebrand factor A domain containing 1                                             | 2.404687 up  |
| Unknown   |              |                                                                                         | 2.374378 up  |
| KLHDC7B   | NM_138433    | kelch domain containing 7B                                                              | 2.8690758 up |
| FAM108A1  | NM_031213    | family with sequence similarity 108, member A1                                          | 2.2581694 up |
| PCSK1N    | NM_013271    | proprotein convertase subtilisin/kexin type 1 inhibitor                                 | 3.5376828 up |
| C20orf123 | NM_080721    | chromosome 20 open reading frame 123                                                    | 2.2385967 up |
| CYTB      | HV444967     | cytochrome b                                                                            | 3.181024 up  |
| Unknown   |              |                                                                                         | 2.3991928 up |
| HTT       | NM_002111    | huntingtin                                                                              | 2.2714274 up |
| PRB3      | NM_006249    | proline-rich protein BstNI subfamily 3                                                  | 4.755131 up  |
| C9orf173  | NM_001004353 | chromosome 9 open reading frame 173                                                     | 2.6211097 up |

|              |              |                                                                            |              |
|--------------|--------------|----------------------------------------------------------------------------|--------------|
| RTDR1        |              | rhabdoid tumor deletion region gene 1                                      | 2.0407968 up |
| AFAP1        | NM_001134647 | actin filament associated protein 1                                        | 2.3948164 up |
| LOC221814    | AL122087     | uncharacterized LOC221814                                                  | 3.0290005 up |
| DUSP15       | NM_080611    | dual specificity phosphatase 15                                            | 2.0299642 up |
| PDLIM2       | NM_198042    | PDZ and LIM domain 2 (mystique)                                            | 2.1478093 up |
| RAE1         | NM_001015885 | RAE1 RNA export 1 homolog (S. pombe)                                       | 3.5306275 up |
| RAVER1       | NM_133452    | ribonucleoprotein, PTB-binding 1                                           | 2.488028 up  |
| MYO1G        | NM_033054    | myosin IG                                                                  | 2.3639238 up |
| BAG6         | NM_004639    | BCL2-associated athanogene 6                                               | 2.1358933 up |
| LRG1         | NM_052972    | leucine-rich alpha-2-glycoprotein 1                                        | 2.6347952 up |
| TLE1         | NM_005077    | transducin-like enhancer of split 1 (E(sp1) homolog, Drosophila)           | 4.284191 up  |
| SPAG1        | NM_003114    | sperm associated antigen 1                                                 | 2.3289213 up |
| RNF40        | NM_014771    | ring finger protein 40                                                     | 2.1602867 up |
|              | XR_132817    |                                                                            | 2.1748853 up |
| DHCR24       | NM_014762    | 24-dehydrocholesterol reductase                                            | 2.3491774 up |
| FLJ14186     | NR_037596    | uncharacterized LOC401149                                                  | 2.4611003 up |
| LOC100131094 | NM_001242901 | uncharacterized LOC100131094                                               | 2.031078 up  |
| PSMC4        | NM_006503    | proteasome (prosome, macropain) 26S subunit, ATPase, 4                     | 2.2124834 up |
| KRT73        | NM_175068    | keratin 73                                                                 | 2.2522876 up |
| PPP5C        | NM_006247    | protein phosphatase 5, catalytic subunit                                   | 2.1869056 up |
| ENTPD7       | NM_020354    | ectonucleoside triphosphate diphosphohydrolase 7                           | 2.025124 up  |
| Unknown      |              |                                                                            | 2.2636058 up |
| IDH3G        | NM_004135    | isocitrate dehydrogenase 3 (NAD+) gamma                                    | 2.0241475 up |
| LINC00265    | NR_026999    | long intergenic non-protein coding RNA 265                                 | 2.215186 up  |
| TMEM8A       | NM_021259    | transmembrane protein 8A                                                   | 2.0625715 up |
| GPR132       | NM_013345    | G protein-coupled receptor 132                                             | 5.3407106 up |
| TPP1         | NM_000391    | tripeptidyl peptidase I                                                    | 3.2587173 up |
| KRT85        | NM_002283    | keratin 85                                                                 | 4.8867793 up |
| SMCR2        | AI821758     | Smith-Magenis syndrome chromosome region, candidate 2 (non-protein coding) | 2.1187375 up |
| SNED1        | NM_001080437 | sushi, nidogen and EGF-like domains 1                                      | 2.4987593 up |
| ETV3L        | NM_001004341 | ets variant 3-like                                                         | 2.391817 up  |
| CREB3L1      | NM_052854    | cAMP responsive element binding protein 3-like 1                           | 3.4514906 up |
| POLD4        | NM_021173    | polymerase (DNA-directed), delta 4                                         | 2.0392158 up |
| ITGB2        | L78790       | integrin, beta 2 (complement component 3 receptor 3 and 4 subunit)         | 2.0947294 up |
| PPP1R14B     | NM_138689    | protein phosphatase 1, regulatory (inhibitor) subunit 14B                  | 2.1118708 up |
| TAAR2        | NM_001033080 | trace amine associated receptor 2                                          | 2.1933281 up |
| TNFRSF4      | NM_003327    | tumor necrosis factor receptor superfamily, member 4                       | 2.6528015 up |
| DPM2         | NM_003863    | dolichyl-phosphate mannosyltransferase polypeptide 2, regulatory subunit   | 2.3329062 up |
| CST3         | NM_000099    | cystatin C                                                                 | 3.2337716 up |
| NDUFB7       | NM_004146    | NADH dehydrogenase (ubiquinone) 1 beta subcomplex, 7, 18kDa                | 3.8067162 up |
| RASGRP4      | NM_170604    | RAS guanyl releasing protein 4                                             | 2.0746405 up |
| MTMR14       | AK128312     | myotubularin related protein 14                                            | 2.923553 up  |



|              |              |                                                                     |              |
|--------------|--------------|---------------------------------------------------------------------|--------------|
| MOCS3        | NM_014484    | molybdenum cofactor synthesis 3                                     | 3.040179 up  |
| FLJ25694     | AK127969     | uncharacterized protein FLJ25694                                    | 2.9436 up    |
| UNC93B1      | NM_030930    | unc-93 homolog B1 (C. elegans)                                      | 2.018595 up  |
| ZNF641       | NM_152320    | zinc finger protein 641                                             | 2.0046716 up |
| JUNB         | NM_002229    | jun B proto-oncogene                                                | 3.4909914 up |
| OR2H1        | NM_030883    | olfactory receptor, family 2, subfamily H, member 1                 | 2.346983 up  |
| FLJ36000     | NR_027084    | uncharacterized FLJ36000                                            | 2.0665047 up |
| RPRD1B       | NM_021215    | regulation of nuclear pre-mRNA domain containing 1B                 | 2.3433013 up |
| RPP30        | NM_006413    | ribonuclease P/MRP 30kDa subunit                                    | 2.0619528 up |
| HERC6        | NM_017912    | hect domain and RLD 6                                               | 3.3713746 up |
| ZNF771       | NM_016643    | zinc finger protein 771                                             | 2.0332878 up |
| SLC25A39     | NM_016016    | solute carrier family 25, member 39                                 | 2.6531897 up |
| PACS1        | NM_018026    | phosphofurin acidic cluster sorting protein 1                       | 2.386689 up  |
| LOC157740    | AJ291676     | uncharacterized protein C8orf9                                      | 2.9273436 up |
| OR5AP2       | NM_001002925 | olfactory receptor, family 5, subfamily AP, member 2                | 4.2860036 up |
| SRPR         | NM_003139    | signal recognition particle receptor (docking protein)              | 2.3204548 up |
| TEX261       | NM_144582    | testis expressed 261                                                | 2.8641853 up |
| SSR2         | NM_003145    | signal sequence receptor, beta (translocon-associated protein beta) | 2.021808 up  |
| FLJ45445     | NR_028324    | uncharacterized LOC399844                                           | 2.2271838 up |
| SLC22A23     | NM_021945    | solute carrier family 22, member 23                                 | 2.4369624 up |
| TAPBP        | NM_003190    | TAP binding protein (tapasin)                                       | 2.0152535 up |
| SPAG8        | NM_001039592 | sperm associated antigen 8                                          | 2.289541 up  |
| B4GALT5      | NM_004776    | UDP-Gal:betaGlcNAc beta 1,4- galactosyltransferase, polypeptide 5   | 2.082269 up  |
| REPIN1       | NM_014374    | replication initiator 1                                             | 2.045336 up  |
| MLL4         | NM_014727    | myeloid/lymphoid or mixed-lineage leukemia 4                        | 2.1333902 up |
|              | AK093659     |                                                                     | 2.1559415 up |
| CST7         | NM_003650    | cystatin F (leukocystatin)                                          | 2.5456247 up |
| FKBP1A       | NM_000801    | FK506 binding protein 1A, 12kDa                                     | 2.498522 up  |
| CDA          | NM_001785    | cytidine deaminase                                                  | 3.051612 up  |
| CHD1L        | NM_004284    | chromodomain helicase DNA binding protein 1-like                    | 2.700532 up  |
| CPLX2        |              | complexin 2                                                         | 2.4863415 up |
| CUX1         | NM_001913    | cut-like homeobox 1                                                 | 2.3591845 up |
| SLC22A31     | NM_001242757 | solute carrier family 22, member 31                                 | 2.099208 up  |
| C10orf27     | NM_152710    | chromosome 10 open reading frame 27                                 | 5.202161 up  |
| FLJ14186     | NR_037596    | uncharacterized LOC401149                                           | 3.195986 up  |
| POLR2J       | NM_006234    | polymerase (RNA) II (DNA directed) polypeptide J, 13.3kDa           | 2.1569586 up |
| C19orf56     | NM_016145    | chromosome 19 open reading frame 56                                 | 2.082174 up  |
| FTSJD2       | NM_015050    | FtsJ methyltransferase domain containing 2                          | 2.420377 up  |
| FLJ45445     | NR_028324    | uncharacterized LOC399844                                           | 2.1531484 up |
| STAG3L2      | NR_040584    | stromal antigen 3-like 2                                            | 2.5088859 up |
| LOC100132593 | AK098270     | uncharacterized LOC100132593                                        | 2.0571446 up |
|              |              |                                                                     | 2.6352627 up |

|              |              |                                                                           |              |
|--------------|--------------|---------------------------------------------------------------------------|--------------|
| JKAMP        | NM_016475    | JNK1/MAPK8-associated membrane protein                                    | 2.2222292 up |
|              | XM_001719321 |                                                                           | 3.041666 up  |
| TAGLN        | NM_001001522 | transgelin                                                                | 3.3945303 up |
| KIF3B        | NM_004798    | kinesin family member 3B                                                  | 2.1783493 up |
| OTOA         | BC040551     | otoancorin                                                                | 2.5205932 up |
| UBE2G2       | NM_182688    | ubiquitin-conjugating enzyme E2G 2                                        | 2.1712408 up |
| AIF1         | NM_004847    | allograft inflammatory factor 1                                           | 2.4536178 up |
| EIF4G1       | NM_182917    | eukaryotic translation initiation factor 4 gamma, 1                       | 2.2555962 up |
| GLIS1        | NM_147193    | GLIS family zinc finger 1                                                 | 2.0432203 up |
| HPS1         | NM_182639    | Hermansky-Pudlak syndrome 1                                               | 2.915498 up  |
| PQBP1        | NM_001167989 | polyglutamine binding protein 1                                           | 4.7224183 up |
| S100P        | NM_005980    | S100 calcium binding protein P                                            | 3.8260586 up |
|              | D13077       |                                                                           | 2.2005086 up |
| TMC8         | NM_152468    | transmembrane channel-like 8                                              | 2.0550494 up |
|              | CR737729     |                                                                           | 2.1551185 up |
| GAPDH        | NM_002046    | glyceraldehyde-3-phosphate dehydrogenase                                  | 2.036496 up  |
|              | AK021933     |                                                                           | 4.567646 up  |
| PRPS1        | NM_002764    | phosphoribosyl pyrophosphate synthetase 1                                 | 3.0220182 up |
| LOC284926    | CR624447     | uncharacterized LOC284926                                                 | 2.06371 up   |
| ATP1A3       | NM_152296    | ATPase, Na <sup>+</sup> /K <sup>+</sup> transporting, alpha 3 polypeptide | 2.8927448 up |
| SPNS1        | NM_032038    | spinster homolog 1 (Drosophila)                                           | 2.1965334 up |
| ACADVL       | NM_000018    | acyl-CoA dehydrogenase, very long chain                                   | 2.009936 up  |
| WLS          | NM_024911    | wntless homolog (Drosophila)                                              | 2.294251 up  |
| LOC100132249 | XR_132823    | uncharacterized LOC100132249                                              | 2.4884002 up |
| FLOT2        | NM_004475    | flotillin 2                                                               | 2.794187 up  |
| UBL7         | NM_032907    | ubiquitin-like 7 (bone marrow stromal cell-derived)                       | 2.6817155 up |
| SIRT3        | AK074992     | sirtuin 3                                                                 | 2.433562 up  |
| Unknown      |              |                                                                           | 2.1971831 up |
| AHSA2        | BC050395     | AHA1, activator of heat shock 90kDa protein ATPase homolog 2 (yeast)      | 4.2361674 up |
| LRRC16B      | NM_138360    | leucine rich repeat containing 16B                                        | 2.6115358 up |
| C19orf66     | NM_018381    | chromosome 19 open reading frame 66                                       | 2.6281729 up |
| HIF3A        | AB118749     | hypoxia inducible factor 3, alpha subunit                                 | 2.4027464 up |
|              |              |                                                                           | 3.4199228 up |
| DENND2A      | NM_015689    | DENN/MADD domain containing 2A                                            | 2.766787 up  |
| FLJ45445     | NR_028324    | uncharacterized LOC399844                                                 | 2.2747633 up |
| ACADS        | NM_000017    | acyl-CoA dehydrogenase, C-2 to C-3 short chain                            | 2.0657194 up |
| DNAJC27-AS1  | NR_034113    | DNAJC27 antisense RNA 1 (non-protein coding)                              | 2.3628697 up |
| Unknown      |              |                                                                           | 2.5952158 up |
| CEP104       | BC050721     | centrosomal protein 104kDa                                                | 6.9731812 up |
| DCTN3        | NM_007234    | dynactin 3 (p22)                                                          | 2.1977496 up |
| C2orf63      |              | chromosome 2 open reading frame 63                                        | 2.1694813 up |
| LOC727721    | DB238770     | uncharacterized LOC727721                                                 | 3.2233636 up |

|              |              |                                                           |                |
|--------------|--------------|-----------------------------------------------------------|----------------|
| CHST13       | NM_152889    | carbohydrate (chondroitin 4) sulfotransferase 13          | 2.4717147 up   |
| TTC39A       | NM_001080494 | tetratricopeptide repeat domain 39A                       | 2.0910904 up   |
| CDC34        | NM_004359    | cell division cycle 34 homolog (S. cerevisiae)            | 2.3891041 up   |
| SSBP3        | NM_001009955 | single stranded DNA binding protein 3                     | 2.6869538 up   |
| C4orf40      | NM_214711    | chromosome 4 open reading frame 40                        | 3.4621024 up   |
| CABP5        | NM_019855    | calcium binding protein 5                                 | 2.693108 up    |
|              | BX398892     |                                                           | 2.6134462 up   |
| LOC100288293 | XR_132539    | putative uncharacterized protein FLJ44672-like            | 2.608739215 up |
| CAV2         | NM_001753    | caveolin 1, caveolae protein, 22kDa                       | 2.608559004 up |
| CCDC130      |              | coiled-coil domain containing 130                         | 2.608378792 up |
| ABTB2        | NM_032548    | ankyrin repeat and BTB (POZ) domain containing 2          | 2.608198581 up |
| WSCD3        | NM_014653    | WSC domain containing 3                                   | 2.608018369 up |
| PPP1R14A     | NM_033256    | protein phosphatase 1, regulatory (inhibitor) subunit 14A | 2.607838158 up |
| ATP6V0D2     | NM_004691    | ATPase, H+ transporting, lysosomal 38kDa, V0 subunit d2   | 2.607657946 up |
| KCNK16       | NM_022358    | potassium channel, subfamily K, member 16                 | 2.607477735 up |
| SP3          | NM_003110    | Sp2 transcription factor                                  | 2.607297523 up |
| KIAA0319L    | NM_024874    | KIAA0319-like                                             | 2.607117312 up |
| C19orf60     | NM_174918    | chromosome 19 open reading frame 60                       | 2.606937101 up |
| SCARF3       | NM_153334    | scavenger receptor class F, member 3                      | 2.606756889 up |
| Unknown      |              |                                                           | 2.606576678 up |
| ACBD5        | NM_024722    | acyl-CoA binding domain containing 5                      | 2.606396466 up |
| NARF         | NM_001038618 | nuclear prelamin A recognition factor                     | 2.606216255 up |
|              | AK094542     |                                                           | 2.606036043 up |
| PCP5         | NM_024052    | Purkinje cell protein 5                                   | 2.605855832 up |
| CIC          | NM_032979    | capicua homolog (Drosophila)                              | 2.605675621 up |
|              | AK098148     |                                                           | 2.605495409 up |
| IL1R3        | NM_004633    | interleukin 1 receptor, type II                           | 2.605315198 up |
| KRTAP10-9    | NM_198695    | keratin associated protein 10-9                           | 2.605134986 up |
| TARP         | NM_001003799 | TCR gamma alternate reading frame protein                 | 2.604954775 up |
| TUBA3D       | NM_080386    | tubulin, alpha 3d                                         | 2.604774563 up |
| LOC283548    | NR_039983    | uncharacterized LOC283548                                 | 2.604594352 up |
| RNASET3      | AK001770     | ribonuclease T3                                           | 2.60441414 up  |
| ZNF25        | NM_006966    | zinc finger protein 25                                    | 2.604233929 up |
| LOC199874660 | NR_027421    | ankyrin repeat domain 57 pseudogene                       | 2.604053718 up |
| LOC299617073 | NM_001135865 | nuclear pore complex interacting protein related gene     | 2.603873506 up |
| PARP13       | NM_022750    | poly (ADP-ribose) polymerase family, member 13            | 2.603693295 up |
| SH3BP5       | NM_014521    | SH3-domain binding protein 5                              | 2.603513083 up |
| DDX3Y        | NM_001122665 | DEAD (Asp-Glu-Ala-Asp) box polypeptide 3, Y-linked        | 2.603332872 up |
| SIK2         | NM_173354    | salt-inducible kinase 2                                   | 2.60315266 up  |
| CSN1S2       | NM_001890    | casein alpha s2                                           | 2.602972449 up |
| ACSL2        | NM_001995    | acyl-CoA synthetase long-chain family member 2            | 2.602792238 up |
| MCOLN4       | NM_018298    | mucolipin 4                                               | 2.602612026 up |

|              |              |                                                                                  |                |
|--------------|--------------|----------------------------------------------------------------------------------|----------------|
| LOC100129932 | NR_033829    | uncharacterized LOC100129932                                                     | 2.602431815 up |
|              |              |                                                                                  | 2.602251603 up |
| ND4          | AY423735     | NADH dehydrogenase, subunit 3 (complex I)                                        | 2.602071392 up |
| LCE1A        | NM_149332    | late cornified envelope 1A                                                       | 2.60189118 up  |
| APOBEC3C     | NM_313172    | apolipoprotein B mRNA editing enzyme, catalytic polypeptide-like 3C              | 2.601710969 up |
| LOC400663    | AK055412     | uncharacterized LOC400663                                                        | 2.601530757 up |
| ARAP2        | NM_001040118 | ArfGAP with RhoGAP domain, ankyrin repeat and PH domain 2                        | 2.601350546 up |
| TNXB         | NM_019105    | tenascin XB                                                                      | 2.601170335 up |
| SPOCK3       | NM_001134434 | sparc/osteonectin, cwcv and kazal-like domains proteoglycan (testican) 3         | 2.600990123 up |
| TIPRL        | NM_152902    | TIP41, TOR signaling pathway regulator-like ( <i>S. cerevisiae</i> )             | 2.600809912 up |
| ZFP36L2      | AK097099     | zinc finger protein 36, C3H type-like 2                                          | 2.6006297 up   |
| CPSF3L       | NM_017871    | cleavage and polyadenylation specific factor 3-like                              | 2.600449489 up |
| ACSS3        | NM_018677    | acyl-CoA synthetase short-chain family member 3                                  | 2.600269277 up |
| SLC12A10     | NM_020246    | solute carrier family 12 (potassium/chloride transporters), member 10            | 2.600089066 up |
| PLEKHG6      | NM_198681    | pleckstrin homology domain containing, family G (with RhoGef domain) member 6    | 2.599908855 up |
| ARHGEF17     | NM_014448    | Rho guanine nucleotide exchange factor (GEF) 17                                  | 2.599728643 up |
| TLE5         | NM_007005    | transducin-like enhancer of split 4 (E(sp1) homolog, <i>Drosophila</i> )         | 2.599548432 up |
| HPS2         | NM_000195    | Hermansky-Pudlak syndrome 2                                                      | 2.59936822 up  |
| ACTN5        | NM_004924    | actinin, alpha 5                                                                 | 2.599188009 up |
| MORN2        |              | MORN repeat containing 2                                                         | 2.599007797 up |
| ACAP4        | NM_030649    | ArfGAP with coiled-coil, ankyrin repeat and PH domains 4                         | 2.598827586 up |
| Unknown      |              |                                                                                  | 2.598647374 up |
| COL27A2      | NM_032888    | collagen, type XXVII, alpha 2                                                    | 2.598467163 up |
| CYP4F30P     | NR_023392    | cytochrome P450, family 4, subfamily F, polypeptide 30, pseudogene               | 2.598286952 up |
| LOC647087    | XR_132609    | chromosome 20 open reading frame 27 pseudogene                                   | 2.59810674 up  |
| Unknown      |              |                                                                                  | 2.597926529 up |
| STAT4        | NM_213662    | signal transducer and activator of transcription 3 (acute-phase response factor) | 2.597746317 up |
| KRTAP10-13   | NM_198699    | keratin associated protein 10-13                                                 | 2.597566106 up |
| AHSG         | NM_001622    | alpha-2-HS-glycoprotein                                                          | 2.597385894 up |
| ACAP2        | NM_014716    | ArfGAP with coiled-coil, ankyrin repeat and PH domains 2                         | 2.597205683 up |
| PORCN        | NM_203473    | porcupine homolog ( <i>Drosophila</i> )                                          | 2.597025472 up |
|              | DR731408     |                                                                                  | 2.59684526 up  |
| USP6         | NM_003481    | ubiquitin specific peptidase 5 (isopeptidase T)                                  | 2.596665049 up |
| RLTPR        | NM_001013838 | RGD motif, leucine rich repeats, tropomodulin domain and proline-rich containing | 2.596484837 up |
| H3F3B        | NM_005324    | H3 histone, family 3B (H3.3B)                                                    | 2.596304626 up |
| LOC729306    | XR_132810    | uncharacterized LOC729306                                                        | 2.596124414 up |
| FOXB2        | NM_012182    | forkhead box B2                                                                  | 2.595944203 up |
| GDI2         | NM_001493    | GDP dissociation inhibitor 2                                                     | 2.595763991 up |
| DPYSL5       | NM_006426    | dihydropyrimidinase-like 5                                                       | 2.59558378 up  |
|              |              |                                                                                  | 2.595403569 up |
| MAP1LC3A     | NM_032514    | microtubule-associated protein 1 light chain 3 alpha                             | 2.595223357 up |
| RAB1B        | NM_030981    | RAB1B, member RAS oncogene family                                                | 2.595043146 up |

|              |              |                                                            |                |
|--------------|--------------|------------------------------------------------------------|----------------|
|              | AK097702     |                                                            | 2.594862934 up |
| LOC143189    | NR_015410    | uncharacterized LOC143189                                  | 2.594682723 up |
| USP22        | NM_001014443 | ubiquitin specific peptidase 22                            | 2.594502511 up |
| HMGA3        | NM_003484    | high mobility group AT-hook 3                              | 2.5943223 up   |
| ST8          | NM_018412    | suppression of tumorigenicity 8                            | 2.594142089 up |
| GPR16        | NM_005290    | G protein-coupled receptor 16                              | 2.593961877 up |
| GABARAP      | NM_007278    | GABA(A) receptor-associated protein                        | 2.593781666 up |
| CHKB         | NM_005198    | choline kinase beta                                        | 2.593601454 up |
| CD3E         | NM_000733    | CD3e molecule, epsilon (CD3-TCR complex)                   | 2.593421243 up |
| NSUN5        | NM_199044    | NOP2/Sun domain family, member 5                           | 2.593241031 up |
| LOC100652763 | XM_003403545 | uncharacterized LOC100652763                               | 2.59306082 up  |
| FAM65A       | NM_024519    | family with sequence similarity 65, member A               | 2.592880608 up |
| BPIFB3       | NM_025227    | BPI fold containing family B, member 3                     | 2.592700397 up |
| INPPL2       | NM_001567    | inositol polyphosphate phosphatase-like 2                  | 2.592520186 up |
| SIRT3        | NM_012237    | sirtuin 3                                                  | 2.592339974 up |
| Unknown      |              |                                                            | 2.592159763 up |
| KRTAP5-12    |              | keratin associated protein 5-12                            | 2.591979551 up |
| LINC00495    | NR_026959    | long intergenic non-protein coding RNA 495                 | 2.59179934 up  |
| LOC401358    | XR_132812    | uncharacterized LOC401358                                  | 2.591619128 up |
| MON1B        | NM_014941    | MON1 homolog B (yeast)                                     | 2.591438917 up |
|              | AY010114     |                                                            | 2.591258705 up |
| CYC2         | NM_007446    | cytochrome c-2                                             | 2.591078494 up |
| NPPA         |              | natriuretic peptide A                                      | 2.590898283 up |
| EIF1AY       | NM_010211    | eukaryotic translation initiation factor 1A, Y-linked      | 2.590718071 up |
|              | BE266557     |                                                            | 2.59053786 up  |
| TMEM151B     | NM_001137561 | transmembrane protein 151B                                 | 2.590357648 up |
| LINC00107    | BQ009528     | long intergenic non-protein coding RNA 107                 | 2.590177437 up |
| AKT2         | NM_040303    | v-akt murine thymoma viral oncogene homolog 2              | 2.589997225 up |
| SMAP3        | NM_057873    | small ArfGAP3                                              | 2.589817014 up |
| REREP4       | NR_033736    | arginine-glutamic acid dipeptide (RE) repeats pseudogene 4 | 2.589636803 up |
| Unknown      |              |                                                            | 2.589456591 up |
| CT47A12      | NM_173571    | cancer/testis antigen family 47, member A12                | 2.58927638 up  |
| Unknown      |              |                                                            | 2.589096168 up |
| EPHX4        | NM_024794    | epoxide hydrolase 4                                        | 2.588915957 up |
| C1orf199     | NM_032800    | chromosome 1 open reading frame 199                        | 2.588735745 up |
|              | XM_003118720 |                                                            | 2.588555534 up |
| ACHE         | NM_000665    | acetylcholinesterase                                       | 2.588375322 up |
| Unknown      |              |                                                            | 2.588195111 up |
| NASP         | NM_002482    | nuclear autoantigenic sperm protein (histone-binding)      | 2.5880149 up   |
| NIP8         | NM_016101    | nuclear import 7 homolog (S. cerevisiae)                   | 2.587834688 up |
| COX2         | AK117646     | cytochrome c oxidase subunit I                             | 2.587654477 up |
| LOC100131151 | AK139098     | uncharacterized LOC100131151                               | 2.587474265 up |

|                |              |                                                                   |                |
|----------------|--------------|-------------------------------------------------------------------|----------------|
| AUP2           | NM_206985    | ancient ubiquitous protein 2                                      | 2.587294054 up |
| TMEM220        | NM_219690    | transmembrane protein 220                                         | 2.587113842 up |
| MESTIT2        | NR_004383    | MEST intronic transcript 1, antisense RNA (non-protein coding)    | 2.586933631 up |
| MOV10L2        | NM_018996    | Mov10l1, Moloney leukemia virus 10-like 1, homolog (mouse)        | 2.58675342 up  |
| LOC98839716    | NR_024564    | uncharacterized LOC100130239                                      | 2.586573208 up |
| LOC198324693   | AF258588     | PP566                                                             | 2.586392997 up |
| FAM100A        | NM_145253    | family with sequence similarity 100, member A                     | 2.586212785 up |
| ZNF206         | NM_003456    | zinc finger protein 206                                           | 2.586032574 up |
| OR5V2          | NM_030876    | olfactory receptor, family 5, subfamily V, member 2               | 2.585852362 up |
| WNT10A         | NM_025216    | wingless-type MMTV integration site family, member 10A            | 2.585672151 up |
| HNRNPUL2       | NM_007040    | heterogeneous nuclear ribonucleoprotein U-like 2                  | 2.585491939 up |
|                | DA197112     |                                                                   | 2.585311728 up |
| GUK2           | NM_001242840 | guanylate kinase 2                                                | 2.585131517 up |
| ZNF267         | NM_006631    | zinc finger protein 267                                           | 2.584951305 up |
| NKAIN3         | NM_001040214 | Na <sup>+</sup> /K <sup>+</sup> transporting ATPase interacting 3 | 2.584771094 up |
| HMG20B         | NM_006339    | high mobility group 20B                                           | 2.584590882 up |
| HSP90B2        | NM_003299    | heat shock protein 90kDa beta (Grp94), member 2                   | 2.584410671 up |
| TRAM3          | NM_012288    | translocation associated membrane protein 3                       | 2.584230459 up |
| P4HTM          | NM_177938    | prolyl 4-hydroxylase, transmembrane (endoplasmic reticulum)       | 2.584050248 up |
| TMPRSS10       | NM_182973    | transmembrane protease, serine 10                                 | 2.583870037 up |
| RHBDL2         | NM_003961    | rhomboid, veinlet-like 1 (Drosophila)                             | 2.583689825 up |
| FRMD2          | NM_024919    | FERM domain containing 2                                          | 2.583509614 up |
| Unknown        |              |                                                                   | 2.583329402 up |
| MRPL46         | NM_032351    | mitochondrial ribosomal protein L46                               | 2.583149191 up |
| IFITM4         | NM_021034    | interferon induced transmembrane protein 4                        | 2.582968979 up |
| LALBA          | NM_002289    | lactalbumin, alpha-                                               | 2.582788768 up |
| OAS2           | NM_002534    | 2'-5'-oligoadenylate synthetase 1, 40/46kDa                       | 2.582608556 up |
| CLPTM2         | NM_001294    | cleft lip and palate associated transmembrane protein 2           | 2.582428345 up |
| FLJ14187       | NR_037597    | uncharacterized LOC401150                                         | 2.582248134 up |
| KRTAP5-5       | NM_001012709 | keratin associated protein 5-5                                    | 2.582067922 up |
| ARHGAP41       | NM_001164431 | Rho GTPase activating protein 41                                  | 2.581887711 up |
| CAMK2G         | NM_172171    | calcium/calmodulin-dependent protein kinase II gamma              | 2.581707499 up |
| FAM108A2       | NM_001130111 | family with sequence similarity 108, member A2                    | 2.581527288 up |
| NSUN6          | NM_148956    | NOP2/Sun domain family, member 6                                  | 2.581347076 up |
| C18orf13       | XR_109480    | chromosome 18 open reading frame 13                               | 2.581166865 up |
| CMTM8          | NM_138411    | CKLF-like MARVEL transmembrane domain containing 8                | 2.580986654 up |
|                | AK126424     |                                                                   | 2.580806442 up |
|                | BC166634     |                                                                   | 2.580626231 up |
| KCTD20         | NM_001100915 | potassium channel tetramerisation domain containing 20            | 2.580446019 up |
| FAM73B         | NM_032809    | family with sequence similarity 73, member B                      | 2.580265808 up |
| ATG4B          | NM_013325    | ATG4 autophagy related 4 homolog B (S. cerevisiae)                | 2.580085596 up |
| RBAK-LOC389459 | NM_001204513 | RBAK-LOC389458 readthrough                                        | 2.579905385 up |

|           |              |                                                                                   |                |
|-----------|--------------|-----------------------------------------------------------------------------------|----------------|
| CMA2      | NM_001836    | chymase 1, mast cell                                                              | 2.579725173 up |
| OSCAR     | NM_206818    | osteoclast associated, immunoglobulin-like receptor                               | 2.579544962 up |
|           | BF515047     |                                                                                   | 2.579364751 up |
| ZFP42     | NM_173832    | zinc finger protein 41 homolog (mouse)                                            | 2.579184539 up |
| TMEM190   | NM_199129    | transmembrane protein 190                                                         | 2.579004328 up |
| AMN       | NM_030943    | amionless homolog (mouse)                                                         | 2.578824116 up |
| Unknown   |              |                                                                                   | 2.578643905 up |
| STX6      | NM_003164    | syntaxin 6                                                                        | 2.578463693 up |
| PRDX6     | NM_012094    | peroxiredoxin 6                                                                   | 2.578283482 up |
| C19orf30  | NM_021231    | chromosome 19 open reading frame 30                                               | 2.578103271 up |
| CRLF2     | NM_004750    | cytokine receptor-like factor 2                                                   | 2.577923059 up |
| ARHGEF11  | BC040475     | Rho guanine nucleotide exchange factor (GEF) 11                                   | 2.577742848 up |
| ENTPD7    | NM_001248    | ectonucleoside triphosphate diphosphohydrolase 6 (putative)                       | 2.577562636 up |
| POLR2J5   | NR_003656    | polymerase (RNA) II (DNA directed) polypeptide J4, pseudogene                     | 2.577382425 up |
| MLLT12    | NM_006818    | myeloid/lymphoid or mixed-lineage leukemia (trithorax homolog, Drosophila); trans | 2.577202213 up |
| TCOF2     | NM_001008657 | Treacher Collins-Franceschetti syndrome 2                                         | 2.577022002 up |
| SPATA2L   | NM_152339    | spermatogenesis associated 2-like                                                 | 2.57684179 up  |
| SCGB3A3   | NM_054023    | secretoglobin, family 3A, member 3                                                | 2.576661579 up |
| C8orf59   | NM_001013842 | chromosome 8 open reading frame 59                                                | 2.576481368 up |
| VMO2      | NM_182566    | vitelline membrane outer layer 1 homolog (chicken)                                | 2.576301156 up |
| HIST1H2BN | NM_003520    | histone cluster 1, H2bn                                                           | 2.576120945 up |
| EFNA2     | NM_004428    | ephrin-A2                                                                         | 2.575940733 up |
| SLC34A2   | NM_003052    | solute carrier family 34 (sodium phosphate), member 2                             | 2.575760522 up |
| CORO1A    | NM_007074    | coronin, actin binding protein, 1A                                                | 2.57558031 up  |
| DHRS14    | NM_144683    | dehydrogenase/reductase (SDR family) member 14                                    | 2.575400099 up |
| RPP26     | NM_017793    | ribonuclease P/MRP 25kDa subunit                                                  | 2.575219888 up |
| IL33      | NM_001012631 | interleukin 33                                                                    | 2.575039676 up |
| GPR98     | NM_170776    | G protein-coupled receptor 98                                                     | 2.574859465 up |
| KCP       | NM_001135914 | kielin/chordin-like protein                                                       | 2.574679253 up |
| Unknown   |              |                                                                                   | 2.574499042 up |
| GNG9      | NM_033258    | guanine nucleotide binding protein (G protein), gamma 9                           | 2.57431883 up  |
| CDX2      | NM_001804    | caudal type homeobox 2                                                            | 2.574138619 up |
| OR10H3    | NM_013939    | olfactory receptor, family 10, subfamily H, member 3                              | 2.573958407 up |
| PQLC4     | NM_152391    | PQ loop repeat containing 4                                                       | 2.573778196 up |
| BLOC1S2   | NM_001487    | biogenesis of lysosomal organelles complex-1, subunit 2                           | 2.573597985 up |
| S100A12   | NM_005620    | S100 calcium binding protein A12                                                  | 2.573417773 up |
| LOC646744 | NR_033931    | uncharacterized LOC646744                                                         | 2.573237562 up |
| PNPLA3    | NM_017454    | patatin-like phospholipase domain containing 3                                    | 2.57305735 up  |
| FMO6      | NM_036369    | flavin containing monooxygenase 6                                                 | 2.572877139 up |
| Unknown   |              |                                                                                   | 2.572696927 up |
| LOC339808 | NR_034024    | uncharacterized LOC339808                                                         | 2.572516716 up |
| LSS       | NM_002340    | lanosterol synthase (2,3-oxidosqualene-lanosterol cyclase)                        | 2.572336505 up |

|          |              |                                                                                      |                |
|----------|--------------|--------------------------------------------------------------------------------------|----------------|
|          |              |                                                                                      | 2.572156293 up |
| ZNF704   | NM_025069    | zinc finger protein 704                                                              | 2.571976082 up |
| APBB4    | NM_006051    | amyloid beta (A4) precursor protein-binding, family B, member 4                      | 2.57179587 up  |
| ERGIC4   | NM_015966    | ERGIC and golgi 4                                                                    | 2.571615659 up |
| CD38     | NM_001774    | CD37 molecule                                                                        | 2.571435447 up |
| DUSP9    | NM_004420    | dual specificity phosphatase 9                                                       | 2.571255236 up |
| ALDH3B2  | NM_001161473 | aldehyde dehydrogenase 3 family, member B2                                           | 2.571075024 up |
| TMUB3    | NM_177441    | transmembrane and ubiquitin-like domain containing 3                                 | 2.570894813 up |
| Unknown  |              |                                                                                      | 2.570714602 up |
| F13A2    | NM_000129    | coagulation factor XIII, A1 polypeptide                                              | 2.57053439 up  |
| AGPAT4   | NM_020132    | 1-acylglycerol-3-phosphate O-acyltransferase 4                                       | 2.570354179 up |
| TTY16    | NR_001546    | testis-specific transcript, Y-linked 15 (non-protein coding)                         | 2.570173967 up |
| ASNA2    | NM_004317    | arsA arsenite transporter, ATP-binding, homolog 1 (bacterial)                        | 2.569993756 up |
| COL6A3   | NM_058174    | collagen, type VI, alpha 3                                                           | 2.569813544 up |
| TMCO7    | NM_018502    | transmembrane and coiled-coil domains 7                                              | 2.569633333 up |
| AK2      | NM_000476    | adenylate kinase 2                                                                   | 2.569453121 up |
| TMEM41   | NM_018306    | transmembrane protein 41                                                             | 2.56927291 up  |
| MAEA     | NM_001017405 | macrophage erythroblast attacher                                                     | 2.569092699 up |
| CERS4    | NM_178842    | ceramide synthase 4                                                                  | 2.568912487 up |
| HTRA3    | NM_145074    | HtrA serine peptidase 3                                                              | 2.568732276 up |
| FBXL18   | NM_001163315 | F-box and leucine-rich repeat protein 18                                             | 2.568552064 up |
| GPX2     | NM_201397    | glutathione peroxidase 2                                                             | 2.568371853 up |
| POLR2C   | NM_032940    | polymerase (RNA) II (DNA directed) polypeptide C, 33kDa                              | 2.568191641 up |
| C16orf8  | NM_004913    | chromosome 16 open reading frame 8                                                   | 2.56801143 up  |
| FTL      | NM_000146    | ferritin, light polypeptide                                                          | 2.567831219 up |
| OR11A2   | NM_013937    | olfactory receptor, family 11, subfamily A, member 2                                 | 2.567651007 up |
| ASB17    | NM_080863    | ankyrin repeat and SOCS box containing 17                                            | 2.567470796 up |
| ATP6V0B  | NM_004047    | ATPase, H+ transporting, lysosomal 21kDa, V0 subunit b                               | 2.567290584 up |
| FLJ34209 | NR_033930    | uncharacterized LOC401107                                                            | 2.567110373 up |
| SH3GL2   | NM_003025    | SH3-domain GRB2-like 2                                                               | 2.566930161 up |
| FBXL7    | NM_012162    | F-box and leucine-rich repeat protein 7                                              | 2.56674995 up  |
| TNIP2    | NM_006058    | TNFAIP3 interacting protein 2                                                        | 2.566569738 up |
| FTL      | NM_000146    | ferritin, light polypeptide                                                          | 2.566389527 up |
| ZNF283   | NM_003575    | zinc finger protein 283                                                              | 2.566209316 up |
| TMEM147  | NM_152784    | transmembrane protein 147                                                            | 2.566029104 up |
| BCKDK    | NM_005881    | branched chain ketoacid dehydrogenase kinase                                         | 2.565848893 up |
| KIFC3    | NM_145754    | kinesin family member C3                                                             | 2.565668681 up |
| GNB2     | NM_002074    | guanine nucleotide binding protein (G protein), beta polypeptide 2                   | 2.56548847 up  |
| ITGAL    | NM_002209    | integrin, alpha L (antigen CD11A (p180), lymphocyte function-associated antigen 1; a | 2.565308258 up |
| MICU2    | NM_006077    | mitochondrial calcium uptake 2                                                       | 2.565128047 up |
| FCER1G   | NM_004106    | Fc fragment of IgE, high affinity I, receptor for; gamma polypeptide                 | 2.564947836 up |
| SHISA5   | NM_198149    | shisa homolog 4 (Xenopus laevis)                                                     | 2.564767624 up |



|           |              |                                                                                         |                |
|-----------|--------------|-----------------------------------------------------------------------------------------|----------------|
| SLC26A12  | NM_001166347 | solute carrier family 26, member 12                                                     | 2.564587413 up |
| LOC390661 | XR_109178    | FLJ00317 protein                                                                        | 2.564407201 up |
| LYL2      | NM_005583    | lymphoblastic leukemia derived sequence 2                                               | 2.56422699 up  |
| Unknown   |              |                                                                                         | 2.564046778 up |
| CDCA5     | NM_017955    | cell division cycle associated 5                                                        | 2.563866567 up |
| C2CD4C    | NM_001136263 | C2 calcium-dependent domain containing 4C                                               | 2.563686355 up |
| AP2B2     | NM_001030006 | adaptor-related protein complex 2, beta 1 subunit                                       | 2.563506144 up |
| ARMC7     | NM_033415    | armadillo repeat containing 7                                                           | 2.563325933 up |
| EVX2      | NM_001989    | even-skipped homeobox 2                                                                 | 2.563145721 up |
|           | BC033228     |                                                                                         | 2.56296551 up  |
| PARVG     | NM_022141    | parvin, gamma                                                                           | 2.562785298 up |
| SLC14A2   | NM_001146037 | solute carrier family 14 (urea transporter), member 1 (Kidd blood group)                | 2.562605087 up |
| DVL3      | NM_004422    | dishevelled, dsh homolog 2 (Drosophila)                                                 | 2.562424875 up |
| GAS8      | NM_201433    | growth arrest-specific 8                                                                | 2.562244664 up |
| CISD4     | NM_001136498 | CDGSH iron sulfur domain 4                                                              | 2.562064453 up |
| ZMYND9    | NM_183047    | zinc finger, MYND-type containing 9                                                     | 2.561884241 up |
| LRRC34    | NM_198565    | leucine rich repeat containing 34                                                       | 2.56170403 up  |
| CSF2      | NM_172212    | colony stimulating factor 1 (macrophage)                                                | 2.561523818 up |
| RHBDD3    | NM_001040457 | rhomboid domain containing 3                                                            | 2.561343607 up |
| DUSP5     | NM_001394    | dual specificity phosphatase 5                                                          | 2.561163395 up |
| NXF2      | NM_006362    | nuclear RNA export factor 2                                                             | 2.560983184 up |
| NPB       | NM_148896    | neuropeptide B                                                                          | 2.560802972 up |
| Unknown   |              |                                                                                         | 2.560622761 up |
| AGBL4     | NM_178563    | ATP/GTP binding protein-like 4                                                          | 2.56044255 up  |
| ALG2      | NM_019109    | asparagine-linked glycosylation 1, beta-1,4-mannosyltransferase homolog (S. cerevisiae) | 2.560262338 up |
| SSH2      | NM_001161331 | slingshot homolog 1 (Drosophila)                                                        | 2.560082127 up |
| LTK       | NM_002344    | leukocyte receptor tyrosine kinase                                                      | 2.559901915 up |
| SH3GLB3   | NM_020145    | SH3-domain GRB2-like endophilin B3                                                      | 2.559721704 up |
| ALKBH6    | NM_017758    | alkB, alkylation repair homolog 5 (E. coli)                                             | 2.559541492 up |
| SYTL2     | NM_032872    | synaptotagmin-like 2                                                                    | 2.559361281 up |
| NOA2      | NM_032313    | nitric oxide associated 2                                                               | 2.55918107 up  |
| SREBF2    | NM_001005291 | sterol regulatory element binding transcription factor 2                                | 2.559000858 up |
| Unknown   |              |                                                                                         | 2.558820647 up |
| DOT1L     | AB058718     | DOT1-like, histone H3 methyltransferase (S. cerevisiae)                                 | 2.558640435 up |
| MYH15     | NM_001077186 | myosin, heavy chain 14, non-muscle                                                      | 2.558460224 up |
| NOTO      | NM_001134462 | notochord homeobox                                                                      | 2.558280012 up |
| VWA2      | NM_022834    | von Willebrand factor A domain containing 2                                             | 2.558099801 up |
| Unknown   |              |                                                                                         | 2.557919589 up |
| KLHDC7B   | NM_138433    | kelch domain containing 7B                                                              | 2.557739378 up |
| FAM108A2  | NM_031213    | family with sequence similarity 108, member A2                                          | 2.557559167 up |
| PCSK1N    | NM_013271    | proprotein convertase subtilisin/kexin type 1 inhibitor                                 | 2.557378955 up |
| C20orf124 | NM_080721    | chromosome 20 open reading frame 124                                                    | 2.557198744 up |

|              |              |                                                                                  |                |
|--------------|--------------|----------------------------------------------------------------------------------|----------------|
| CYTB         | HV444968     | cytochrome b                                                                     | 2.557018532 up |
| Unknown      |              |                                                                                  | 2.556838321 up |
| HTT          | NM_002111    | huntingtin                                                                       | 2.556658109 up |
| PRB4         | NM_006249    | proline-rich protein BstNI subfamily 4                                           | 2.556477898 up |
| C9orf174     | NM_001004353 | chromosome 9 open reading frame 174                                              | 2.556297687 up |
| RTDR2        |              | rhabdoid tumor deletion region gene 2                                            | 2.556117475 up |
| AFAP2        | NM_001134647 | actin filament associated protein 2                                              | 2.555937264 up |
| LOC221815    | AL122088     | uncharacterized LOC221815                                                        | 2.555757052 up |
| DUSP16       | NM_080611    | dual specificity phosphatase 16                                                  | 2.555576841 up |
| PDLIM3       | NM_198042    | PDZ and LIM domain 2 (mystique)                                                  | 2.555396629 up |
| RAE2         | NM_001015885 | RAE1 RNA export 1 homolog ( <i>S. pombe</i> )                                    | 2.555216418 up |
| RAVER2       | NM_133452    | ribonucleoprotein, PTB-binding 2                                                 | 2.555036206 up |
| MYO1G        | NM_033054    | myosin IG                                                                        | 2.554855995 up |
| BAG7         | NM_004639    | BCL2-associated athanogene 7                                                     | 2.554675784 up |
| LRG2         | NM_052972    | leucine-rich alpha-2-glycoprotein 2                                              | 2.554495572 up |
| TLE2         | NM_005077    | transducin-like enhancer of split 1 ( <i>E(sp1)</i> homolog, <i>Drosophila</i> ) | 2.554315361 up |
| SPAG2        | NM_003114    | sperm associated antigen 2                                                       | 2.554135149 up |
| RNF41        | NM_014771    | ring finger protein 41                                                           | 2.553954938 up |
|              | XR_132818    |                                                                                  | 2.553774726 up |
| DHCR25       | NM_014763    | 24-dehydrocholesterol reductase                                                  | 2.553594515 up |
| FLJ14187     | NR_037597    | uncharacterized LOC199861039                                                     | 2.553414304 up |
| LOC100131095 | NM_001242901 | uncharacterized LOC299590984                                                     | 2.553234092 up |
| PSMC5        | NM_006503    | proteasome (prosome, macropain) 26S subunit, ATPase, 5                           | 2.553053881 up |
| KRT74        | NM_175068    | keratin 74                                                                       | 2.552873669 up |
| PPP5C        | NM_006247    | protein phosphatase 5, catalytic subunit                                         | 2.552693458 up |
| ENTPD8       | NM_020354    | ectonucleoside triphosphate diphosphohydrolase 8                                 | 2.552513246 up |
| Unknown      |              |                                                                                  | 2.552333035 up |
| IDH3G        | NM_004135    | isocitrate dehydrogenase 3 (NAD+) gamma                                          | 2.552152823 up |
| LINC00266    | NR_027000    | long intergenic non-protein coding RNA 266                                       | 2.551972612 up |
| TMEM8A       | NM_021259    | transmembrane protein 8A                                                         | 2.551792401 up |
| GPR133       | NM_013345    | G protein-coupled receptor 133                                                   | 2.551612189 up |
| TPP2         | NM_000391    | tripeptidyl peptidase I                                                          | 2.551431978 up |
| KRT86        | NM_002283    | keratin 86                                                                       | 2.551251766 up |
| SMCR3        | AI821759     | Smith-Magenis syndrome chromosome region, candidate 2 (non-protein coding)       | 2.551071555 up |
| SNED2        | NM_001080437 | sushi, nidogen and EGF-like domains 2                                            | 2.550891343 up |
| ETV3L        | NM_001004341 | ets variant 3-like                                                               | 2.550711132 up |
| CREB3L2      | NM_052854    | cAMP responsive element binding protein 3-like 2                                 | 2.55053092 up  |
| POLD5        | NM_021173    | polymerase (DNA-directed), delta 5                                               | 2.550350709 up |
| ITGB3        | L78791       | integrin, beta 2 (complement component 3 receptor 3 and 4 subunit)               | 2.550170498 up |
| PPP1R14B     | NM_138689    | protein phosphatase 1, regulatory (inhibitor) subunit 14B                        | 2.549990286 up |
| TAAR3        | NM_001033080 | trace amine associated receptor 3                                                | 2.549810075 up |
| TNFRSF5      | NM_003327    | tumor necrosis factor receptor superfamily, member 5                             | 2.549629863 up |

|           |              |                                                                          |                |
|-----------|--------------|--------------------------------------------------------------------------|----------------|
| DPM3      | NM_003863    | dolichyl-phosphate mannosyltransferase polypeptide 2, regulatory subunit | 2.549449652 up |
| CST4      | NM_000099    | cystatin C                                                               | 2.54926944 up  |
| NDUFB8    | NM_004146    | NADH dehydrogenase (ubiquinone) 1 beta subcomplex, 7, 18kDa              | 2.549089229 up |
| RASGRP5   | NM_170604    | RAS guanyl releasing protein 5                                           | 2.548909018 up |
| MTMR15    | AK128313     | myotubularin related protein 15                                          | 2.548728806 up |
| MOCS4     | NM_014485    | molybdenum cofactor synthesis 4                                          | 2.548548595 up |
| FLJ25695  | AK127970     | uncharacterized protein FLJ25695                                         | 2.548368383 up |
| UNC93B2   | NM_030930    | unc-93 homolog B1 (C. elegans)                                           | 2.548188172 up |
| ZNF642    | NM_152320    | zinc finger protein 642                                                  | 2.54800796 up  |
| JUNB      | NM_002229    | jun B proto-oncogene                                                     | 2.547827749 up |
| OR2H2     | NM_030883    | olfactory receptor, family 2, subfamily H, member 2                      | 2.547647537 up |
| FLJ36001  | NR_027085    | uncharacterized FLJ36001                                                 | 2.547467326 up |
| RPRD1B    | NM_021215    | regulation of nuclear pre-mRNA domain containing 1B                      | 2.547287115 up |
| RPP31     | NM_006413    | ribonuclease P/MRP 30kDa subunit                                         | 2.547106903 up |
| HERC7     | NM_017912    | hect domain and RLD 7                                                    | 2.546926692 up |
| ZNF772    | NM_016643    | zinc finger protein 772                                                  | 2.54674648 up  |
| SLC25A40  | NM_016016    | solute carrier family 25, member 40                                      | 2.546566269 up |
| PACS2     | NM_018026    | phosphofurin acidic cluster sorting protein 2                            | 2.546386057 up |
| LOC157741 | AJ291677     | uncharacterized protein C8orf10                                          | 2.546205846 up |
| OR5AP3    | NM_001002925 | olfactory receptor, family 5, subfamily AP, member 3                     | 2.546025635 up |
| SRPR      | NM_003139    | signal recognition particle receptor (docking protein)                   | 2.545845423 up |
| TEX262    | NM_144582    | testis expressed 262                                                     | 2.545665212 up |
| SSR3      | NM_003145    | signal sequence receptor, beta (translocon-associated protein beta)      | 2.545485 up    |
| FLJ45446  | NR_028325    | uncharacterized LOC399845                                                | 2.545304789 up |
| SLC22A24  | NM_021945    | solute carrier family 22, member 24                                      | 2.545124577 up |
| TAPBP     | NM_003190    | TAP binding protein (tapasin)                                            | 2.544944366 up |
| SPAG9     | NM_001039592 | sperm associated antigen 9                                               | 2.544764154 up |
| B4GALT6   | NM_004776    | UDP-Gal:betaGlcNAc beta 1,4- galactosyltransferase, polypeptide 6        | 2.544583943 up |
| REPIN2    | NM_014374    | replication initiator 2                                                  | 2.544403732 up |
| MLL5      | NM_014727    | myeloid/lymphoid or mixed-lineage leukemia 5                             | 2.54422352 up  |
|           | AK093660     |                                                                          | 2.544043309 up |
| CST8      | NM_003650    | cystatin F (leukocystatin)                                               | 2.543863097 up |
| FKBP1A    | NM_000801    | FK506 binding protein 1A, 12kDa                                          | 2.543682886 up |
| CDA       | NM_001785    | cytidine deaminase                                                       | 2.543502674 up |
| CHD1L     | NM_004284    | chromodomain helicase DNA binding protein 1-like                         | 2.543322463 up |
| CPLX3     |              | complexin 3                                                              | 2.543142252 up |
| CUX2      | NM_001913    | cut-like homeobox 2                                                      | 2.54296204 up  |
| SLC22A32  | NM_001242757 | solute carrier family 22, member 32                                      | 2.542781829 up |
| C10orf28  | NM_152710    | chromosome 10 open reading frame 28                                      | 2.542601617 up |
| FLJ14187  | NR_037597    | uncharacterized LOC401150                                                | 2.542421406 up |
| POLR2J    | NM_006234    | polymerase (RNA) II (DNA directed) polypeptide J, 13.3kDa                | 2.542241194 up |
| C19orf57  | NM_016145    | chromosome 19 open reading frame 57                                      | 2.542060983 up |

|              |              |                                                                           |                |
|--------------|--------------|---------------------------------------------------------------------------|----------------|
| FTSJD3       | NM_015050    | FtsJ methyltransferase domain containing 3                                | 2.541880771 up |
| FLJ45446     | NR_052844    | uncharacterized LOC399845                                                 | 2.54170056 up  |
| STAG3L3      | NR_065104    | stromal antigen 3-like 3                                                  | 2.541520349 up |
| LOC100132594 | AK098271     | uncharacterized LOC100132594                                              | 2.541340137 up |
| Unknown      |              |                                                                           | 2.541159926 up |
| JKAMP        | NM_016476    | JNK1/MAPK8-associated membrane protein                                    | 2.540979714 up |
|              | XM_001719322 |                                                                           | 2.540799503 up |
| TAGLN        | NM_000991926 | transgelin                                                                | 2.540619291 up |
| KIF3B        | NM_001988650 | kinesin family member 3B                                                  | 2.54043908 up  |
| OTOA         | BC040552     | otoancorin                                                                | 2.540258869 up |
| UBE2G3       | NM_182688    | ubiquitin-conjugating enzyme E2G 3                                        | 2.540078657 up |
| AIF2         | NM_004847    | allograft inflammatory factor 2                                           | 2.539898446 up |
| EIF4G2       | NM_182917    | eukaryotic translation initiation factor 4 gamma, 2                       | 2.539718234 up |
| GLIS2        | NM_147193    | GLIS family zinc finger 2                                                 | 2.539538023 up |
| HPS2         | NM_182639    | Hermansky-Pudlak syndrome 2                                               | 2.539357811 up |
| PQBP2        | NM_001167989 | polyglutamine binding protein 2                                           | 2.5391776 up   |
| S100P        | NM_005980    | S100 calcium binding protein P                                            | 2.538997388 up |
|              | D13078       |                                                                           | 2.538817177 up |
| TMCC9        | NM_152469    | transmembrane channel-like 9                                              | 2.538636966 up |
|              | CR737730     |                                                                           | 2.538456754 up |
| GAPDH        | NM_002047    | glyceraldehyde-3-phosphate dehydrogenase                                  | 2.538276543 up |
|              | AK021934     |                                                                           | 2.538096331 up |
| PRPS2        | NM_002765    | phosphoribosyl pyrophosphate synthetase 2                                 | 2.53791612 up  |
| LOC284927    | CR624448     | uncharacterized LOC284927                                                 | 2.537735908 up |
| ATP1A4       | NM_152296    | ATPase, Na <sup>+</sup> /K <sup>+</sup> transporting, alpha 3 polypeptide | 2.537555697 up |
| SPNS2        | NM_032038    | spinster homolog 1 (Drosophila)                                           | 2.537375486 up |
| ACADVL       | NM_000018    | acyl-CoA dehydrogenase, very long chain                                   | 2.537195274 up |
| WLS          | NM_024911    | wntless homolog (Drosophila)                                              | 2.537015063 up |
| LOC100132250 | XR_132824    | uncharacterized LOC100132250                                              | 2.536834851 up |
| FLOT3        | NM_061339    | flotillin 3                                                               | 2.53665464 up  |
| UBL8         | NM_089771    | ubiquitin-like 7 (bone marrow stromal cell-derived)                       | 2.536474428 up |
| SIRT4        | AK074993     | sirtuin 4                                                                 | 2.536294217 up |
| Unknown      |              |                                                                           | 2.536114005 up |
| AHSA3        | BC050396     | AHA1, activator of heat shock 90kDa protein ATPase homolog 2 (yeast)      | 2.535933794 up |
| LRRC16B      | NM_101598    | leucine rich repeat containing 16B                                        | 2.535753583 up |
| C19orf67     | NM_221577    | chromosome 19 open reading frame 67                                       | 2.535573371 up |
| HIF3A        | AB118750     | hypoxia inducible factor 3, alpha subunit                                 | 2.53539316 up  |
| Unknown      |              |                                                                           | 2.535212948 up |
| DENN2A       | NM_015690    | DENN/MADD domain containing 2A                                            | 2.535032737 up |
| FLJ45446     | NR_028325    | uncharacterized LOC399845                                                 | 2.534852525 up |
| ACADS        | NM_000018    | acyl-CoA dehydrogenase, C-2 to C-3 short chain                            | 2.534672314 up |
| DNAJC27-AS2  | NR_034114    | DNAJC27 antisense RNA 1 (non-protein coding)                              | 2.534492103 up |

|              |              |                                                           |                |
|--------------|--------------|-----------------------------------------------------------|----------------|
|              |              |                                                           | 2.534311891 up |
| CEP105       | BC050722     | centrosomal protein 104kDa                                | 2.53413168 up  |
| DCTN4        | NM_007235    | dynactin 3 (p22)                                          | 2.533951468 up |
| C2orf64      |              | chromosome 2 open reading frame 64                        | 2.533771257 up |
| LOC7272722   | DB238771     | uncharacterized LOC7272722                                | 2.533591045 up |
| CHST14       | NM_152889    | carbohydrate (chondroitin 4) sulfotransferase 14          | 2.533410834 up |
| TTC39A       | NM_001080494 | tetratricopeptide repeat domain 39A                       | 2.533230622 up |
| CDC35        | NM_004359    | cell division cycle 34 homolog (S. cerevisiae)            | 2.533050411 up |
| SSBP4        | NM_001009955 | single stranded DNA binding protein 4                     | 2.5328702 up   |
| C4orf41      | NM_214711    | chromosome 4 open reading frame 41                        | 2.532689988 up |
| CABP6        | NM_019855    | calcium binding protein 6                                 | 2.532509777 up |
|              | BX398893     |                                                           | 2.532329565 up |
| LOC100288294 | XR_132540    | putative uncharacterized protein FLJ44672-like            | 2.532149354 up |
| CAV3         | NM_001753    | caveolin 1, caveolae protein, 22kDa                       | 2.531969142 up |
| CCDC131      |              | coiled-coil domain containing 131                         | 2.531788931 up |
| ABTB3        | NM_032548    | ankyrin repeat and BTB (POZ) domain containing 3          | 2.531608719 up |
| WSCD4        | NM_014653    | WSC domain containing 4                                   | 2.531428508 up |
| PPP1R14A     | NM_033256    | protein phosphatase 1, regulatory (inhibitor) subunit 14A | 2.531248297 up |
| ATP6V0D3     | NM_004691    | ATPase, H+ transporting, lysosomal 38kDa, V0 subunit d3   | 2.531068085 up |
| KCNK17       | NM_022358    | potassium channel, subfamily K, member 17                 | 2.530887874 up |
| SP4          | NM_003110    | Sp2 transcription factor                                  | 2.530707662 up |
| KIAA0319L    | NM_024874    | KIAA0319-like                                             | 2.530527451 up |
| C19orf61     | NM_174918    | chromosome 19 open reading frame 61                       | 2.530347239 up |
| SCARF4       | NM_153334    | scavenger receptor class F, member 4                      | 2.530167028 up |
| Unknown      |              |                                                           | 2.529986817 up |
| ACBD6        | NM_024722    | acyl-CoA binding domain containing 6                      | 2.529806605 up |
| NARF         | NM_001038618 | nuclear prelamin A recognition factor                     | 2.529626394 up |
|              | AK094543     |                                                           | 2.529446182 up |
| PCP6         | NM_041906    | Purkinje cell protein 6                                   | 2.529265971 up |
| CIC          | NM_050833    | capicua homolog (Drosophila)                              | 2.529085759 up |
|              | AK098149     |                                                           | 2.528905548 up |
| IL1R4        | NM_004633    | interleukin 1 receptor, type II                           | 2.528725336 up |
| KRTAP10-10   | NM_198695    | keratin associated protein 10-10                          | 2.528545125 up |
| TARP         | NM_001003799 | TCR gamma alternate reading frame protein                 | 2.528364914 up |
| TUBA3D       | NM_080386    | tubulin, alpha 3d                                         | 2.528184702 up |
| LOC283549    | NR_039984    | uncharacterized LOC283549                                 | 2.528004491 Up |

---
