# Supplementary material for: Transcriptional signature associated with early rheumatoid arthritis and healthy individuals at high risk to develop the disease
Source: PubMed Central journal article supplement (PMC5870959; doi:10.1371/journal.pone.0194205), 2018-03-27
Supplement: pone.0194205.s005.pdf [file pone.0194205.s005.pdf]

**Supplementary table 5.** Down regulated genes in relatives with ACCP+ vs relatives with ACCP-

| Gene Symbol  | Genbank Accession     | Gene Name                                                              | Fold Change | Regulation |
|--------------|-----------------------|------------------------------------------------------------------------|-------------|------------|
|              | AK127601              |                                                                        | -8.149225   | down       |
| TNR          | NM_003285             | tenascin R (restrictin, janusin)                                       | -6.9211035  | down       |
| ZNF326       | NM_182975///NM_182976 | zinc finger protein 326                                                | -6.9098153  | down       |
|              | BC040619              |                                                                        | -6.651993   | down       |
| KRTAP4-1     | NM_033060             | keratin associated protein 4-1                                         | -6.053292   | down       |
| CCDC64B      | NM_001103175          | coiled-coil domain containing 64B                                      | -5.9813466  | down       |
| AADA3L3      | NM_001103170          | arylacetamide deacetylase-like 3                                       | -5.93062    | down       |
| LOC143286    | AL049428              | uncharacterized LOC143286                                              | -5.6371875  | down       |
| C17orf99     | NM_001163075          | chromosome 17 open reading frame 99                                    | -5.471807   | down       |
| TMEM174      | NM_153217             | transmembrane protein 174                                              | -5.4278245  | down       |
| LOC146795    | AK057377              | uncharacterized LOC146795                                              | -5.4235826  | down       |
| GABRE        | NM_004961             | gamma-aminobutyric acid (GABA) A receptor, epsilon                     | -5.390086   | down       |
| MAGEC1       | NM_005462             | melanoma antigen family C, 1                                           | -5.3627763  | down       |
| ACBD7        | NM_001039844          | acyl-CoA binding domain containing 7                                   | -5.3035192  | down       |
| IGLON5       | NM_001101372          | IgLON family member 5                                                  | -5.2727575  | down       |
| COL4A1       | NM_001845             | collagen, type IV, alpha 1                                             | -5.2538695  | down       |
| LOC284014    | AK095567              | uncharacterized LOC284014                                              | -5.1718607  | down       |
| SPEG         | NM_005876             | SPEG complex locus                                                     | -5.171494   | down       |
| C7           | NM_000587             | complement component 7                                                 | -5.003119   | down       |
|              | BE244176              |                                                                        | -4.975176   | down       |
| LOC100130442 | AK131364              | uncharacterized LOC100130442                                           | -4.9635677  | down       |
| TERT         | NM_198253             | telomerase reverse transcriptase                                       | -4.9621606  | down       |
| LOC100128811 | NR_027333             | uncharacterized LOC100128811                                           | -4.886698   | down       |
| DPYSL3       | NM_001387             | dihydropyrimidinase-like 3                                             | -4.842905   | down       |
| RASGEF1C     | NM_175062             | RasGEF domain family, member 1C                                        | -4.7974463  | down       |
| LOC729668    | NR_003524             | golgi autoantigen, golgin subfamily a, 6 pseudogene                    | -4.762927   | down       |
| RABL2B       | BC020495              | RAB, member of RAS oncogene family-like 2B                             | -4.7587266  | down       |
| LOC100133131 | AF289593              | uncharacterized LOC100133131                                           | -4.7572374  | down       |
| KALRN        | AK131379///AK125979   | kalirin, RhoGEF kinase                                                 | -4.7004085  | down       |
| C15orf59     | NM_001039614          | chromosome 15 open reading frame 59                                    | -4.6669188  | down       |
| LOC100287314 | NR_040245             | uncharacterized LOC100287314                                           | -4.633044   | down       |
| ANKRD20A5P   | BC022023              | ankyrin repeat domain 20 family, member A5, pseudogene                 | -4.535587   | down       |
|              | BC039333              |                                                                        | -4.522702   | down       |
|              | AK026667              |                                                                        | -4.511659   | down       |
|              | BM930849              |                                                                        | -4.493437   | down       |
|              | AF289570              |                                                                        | -4.4800324  | down       |
| LOC283335    | NR_033854             | uncharacterized LOC283335                                              | -4.4514327  | down       |
| OPN1MW       | NM_000513             | opsin 1 (cone pigments), medium-wave-sensitive                         | -4.419268   | down       |
| KCNT1        | AK123276              | potassium channel, subfamily T, member 1                               | -4.409153   | down       |
| LOC100130713 | AK096566              | uncharacterized LOC100130713                                           | -4.406819   | down       |
| XRCC2        | NM_005431             | X-ray repair complementing defective repair in Chinese hamster cells 2 | -4.3245616  | down       |
| LOC100129048 | AK128074              | uncharacterized LOC100129048                                           | -4.314815   | down       |
| LOC731932    | XM_001716667          | uncharacterized LOC731932                                              | -4.299716   | down       |
| PPIAL4G      | AK123006              | peptidylprolyl isomerase A (cyclophilin A)-like 4G                     | -4.292633   | down       |

|              |              |                                                                                                                      |            |      |
|--------------|--------------|----------------------------------------------------------------------------------------------------------------------|------------|------|
| KRTAP10-5    | NM_198694    | keratin associated protein 10-5                                                                                      | -4.2823825 | down |
| MSTO2P       | NR_024117    | misato homolog 2 pseudogene                                                                                          | -4.2730513 | down |
| HOGA1        | AK094791     | 4-hydroxy-2-oxoglutarate aldolase 1                                                                                  | -4.2575474 | down |
| RASSF6       | NM_201431    | Ras association (RalGDS/AF-6) domain family member 6                                                                 | -4.255986  | down |
| SCNN1D       | NM_001130413 | sodium channel, nonvoltage-gated 1, delta                                                                            | -4.190655  | down |
| SPRR2E       | NM_001024209 | small proline-rich protein 2E                                                                                        | -4.182568  | down |
| HTR6         | NM_000871    | 5-hydroxytryptamine (serotonin) receptor 6                                                                           | -4.152948  | down |
| LOC284454    | NR_036515    | uncharacterized LOC284454                                                                                            | -4.148765  | down |
| FAT3         | NM_001008781 | FAT tumor suppressor homolog 3 (Drosophila)                                                                          | -4.1319385 | down |
| ANP32A-IT1   | NR_026808    | ANP32A intronic transcript 1 (non-protein coding)                                                                    | -4.1204963 | down |
| FAM151A      | NM_176782    | family with sequence similarity 151, member A                                                                        | -4.105673  | down |
| BMP8B        | NM_001720    | bone morphogenetic protein 8b                                                                                        | -4.078451  | down |
| LOC145820    | NR_027132    | uncharacterized LOC145820                                                                                            | -4.0527415 | down |
| SRGAP1       | NM_020762    | SLIT-ROBO Rho GTPase activating protein 1                                                                            | -4.021942  | down |
| GOLGA1       |              | golgin A1                                                                                                            | -3.9849272 | down |
| ZNF713       | NM_182633    | zinc finger protein 713                                                                                              | -3.9646027 | down |
| CD70         | NM_001252    | CD70 molecule                                                                                                        | -3.9595456 | down |
| C20orf85     | NM_178456    | chromosome 20 open reading frame 85                                                                                  | -3.9237356 | down |
|              | BC035135     |                                                                                                                      | -3.9192657 | down |
| LOC257152    | AK001439     | uncharacterized LOC257152                                                                                            | -3.8936198 | down |
| TMEM211      | NM_001001663 | transmembrane protein 211                                                                                            | -3.8791683 | down |
| LINC00162    | NR_024089    | long intergenic non-protein coding RNA 162                                                                           | -3.876327  | down |
| RIIAD1       | NM_001144956 | regulatory subunit of type II PKA R-subunit (RIIa) domain containing 1                                               | -3.8571253 | down |
| DEFB132      | NM_207469    | defensin, beta 132                                                                                                   | -3.8566248 | down |
| C3orf51      | NR_024615    | chromosome 3 open reading frame 51                                                                                   | -3.8433135 | down |
|              | AK126743     |                                                                                                                      | -3.83514   | down |
|              | AK124041     |                                                                                                                      | -3.813653  | down |
| LOC728208    | XR_108453    | uncharacterized LOC728208                                                                                            | -3.8022668 | down |
| KLK3         | NM_001030050 | kallikrein-related peptidase 3                                                                                       | -3.7934535 | down |
| SLC22A7      | NM_153320    | solute carrier family 22 (organic anion transporter), member 7                                                       | -3.7900012 | down |
| DKFZp451A211 | XM_003403663 | DKFZp451A211 protein                                                                                                 | -3.7832575 | down |
| ZNF2         | NM_021088    | zinc finger protein 2                                                                                                | -3.7799203 | down |
| LOC541472    | XR_108749    | uncharacterized LOC541472                                                                                            | -3.7415555 | down |
| MRP63        | NM_024026    | mitochondrial ribosomal protein 63                                                                                   | -3.7029822 | down |
| EDA          | NM_001005610 | ectodysplasin A                                                                                                      | -3.6996717 | down |
| ABCD3        | NM_001122674 | ATP-binding cassette, sub-family D (ALD), member 3                                                                   | -3.6944852 | down |
|              | AK097143     |                                                                                                                      | -3.682143  | down |
|              | XR_133518    |                                                                                                                      | -3.6721823 | down |
| BAALC        |              | brain and acute leukemia, cytoplasmic solute carrier family 7 (cationic amino acid transporter, y+ system), member 3 | -3.6676579 | down |
| LOC284379    | NR_002938    | uncharacterized LOC284379                                                                                            | -3.6466064 | down |
|              | AF068294     |                                                                                                                      | -3.6458466 | down |
| RHCG         | NM_016321    | Rh family, C glycoprotein                                                                                            | -3.6436305 | down |
| MGC16121     | NR_024607    | uncharacterized protein MGC16121                                                                                     | -3.6432042 | down |
| CERCAM       | NM_016174    | cerebral endothelial cell adhesion molecule                                                                          | -3.6397061 | down |
| LOC201477    | NR_038895    | uncharacterized LOC201477                                                                                            | -3.6162875 | down |

|              |                             |                                                                |                          |              |
|--------------|-----------------------------|----------------------------------------------------------------|--------------------------|--------------|
| C2orf66      | NM_213608                   | chromosome 2 open reading frame 66                             | -3.6038916               | down         |
| NEAT1        | AF001893                    | nuclear paraspeckle assembly transcript 1 (non-protein coding) | -3.6036763               | down         |
| KRT74        | NM_175053                   | keratin 74                                                     | -3.5976164               | down         |
| PRSS47       | XR_108978                   | protease, serine, 47                                           | -3.5894709               | down         |
| MGC4859      | BC002644                    | uncharacterized LOC79150                                       | -3.588737                | down         |
| ST8SIA1      | NM_003034                   | ST8 alpha-N-acetyl-neuraminide alpha-2,8-sialyltransferase 1   | -3.5464482               | down         |
| C9orf153     | NM_001010907                | chromosome 9 open reading frame 153                            | -3.539701                | down         |
| MRPS16       | NM_016065                   | mitochondrial ribosomal protein S16                            | -3.5393963               | down         |
| SH3GL3       | NM_003027                   | SH3-domain GRB2-like 3                                         | -3.5385592               | down         |
| TRIP13       | NM_004237                   | thyroid hormone receptor interactor 13                         | -3.5316992               | down         |
| LOC644649    | BX108667                    | apolipoprotein O pseudogene                                    | -3.5239089               | down         |
| GSG1         | NM_001206842///NM_001080554 | germ cell associated 1                                         | -3.511323                | down         |
| MYOZ3        | NM_133371                   | myozenin 3                                                     | -3.510613                | down         |
| LOC100127904 | BC065739                    | uncharacterized LOC100127904                                   | -3.5052238               | down         |
| LOC442366    | XM_001714957                | uncharacterized LOC442366                                      | -3.4912412               | down         |
| LOC100652869 | XM_003403453                | uncharacterized LOC100652869                                   | -3.4865127               | down         |
| ASIP         | NM_001672<br>AF390550       | agouti signaling protein                                       | -3.4822333<br>-3.4373658 | down<br>down |
| LOC100130876 | XR_109361                   | uncharacterized LOC100130876                                   | -3.435041                | down         |
| COL5A1       | AK057231                    | collagen, type V, alpha 1                                      | -3.426531                | down         |
| CRYBB2P1     | NR_033733                   | crystallin, beta B2 pseudogene 1                               | -3.4127192               | down         |
| POLR2J2      | NM_032959                   | polymerase (RNA) II (DNA directed) polypeptide J2              | -3.4098988               | down         |
| ZNF667       | NM_022103                   | zinc finger protein 667                                        | -3.4020307               | down         |
| LANCL3       | NM_198511                   | LanC lantibiotic synthetase component C-like 3 (bacterial)     | -3.3886886               | down         |
| LOC340073    | NR_037895                   | uncharacterized LOC340073                                      | -3.3809247               | down         |
| SCARA5       | AY337579                    | scavenger receptor class A, member 5 (putative)                | -3.3774571               | down         |
| LOC286154    | AK096739                    | uncharacterized LOC286154                                      | -3.3768787               | down         |
| INADL        | AJ001306<br>AK025047        | InaD-like (Drosophila)                                         | -3.3725493<br>-3.3656507 | down<br>down |
| CCBL2        | NM_001008661                | cysteine conjugate-beta lyase 2                                | -3.3546028               | down         |
| CTPS2        | NM_001144002                | CTP synthase II                                                | -3.3519897               | down         |
| LOC100128366 | XR_132755                   | uncharacterized LOC100128366                                   | -3.3333921               | down         |
| F8           | NM_000132                   | coagulation factor VIII, procoagulant component                | -3.3271666               | down         |
| SGSM2        | NM_014853///AK124883        | small G protein signaling modulator 2                          | -3.3230295               | down         |
| LOC729609    | NR_024440                   | uncharacterized LOC729609                                      | -3.3229191               | down         |
| PHLDA3       | NM_012396                   | pleckstrin homology-like domain, family A, member 3            | -3.3228786               | down         |
|              | BC007984                    |                                                                | -3.3201811               | down         |
|              | AK130932                    |                                                                | -3.317462                | down         |
|              | XM_003403554                |                                                                | -3.3143845               | down         |
| TTY14        | NR_001543                   | testis-specific transcript, Y-linked 14 (non-protein coding)   | -3.3106325               | down         |
| LDHAL6A      | NM_144972                   | lactate dehydrogenase A-like 6A                                | -3.3089619               | down         |
| DRD3         | NM_033663                   | dopamine receptor D3                                           | -3.303985                | down         |
| CD276        | NM_001024736                | CD276 molecule                                                 | -3.3010466               | down         |
| GOLGA6L9     | NM_198181                   | golgin A6 family-like 9                                        | -3.2969959               | down         |
| MDH1B        | AK309144                    | malate dehydrogenase 1B, NAD (soluble)                         | -3.292479                | down         |
| CLDN24       | NM_001185149                | claudin 24                                                     | -3.2797403               | down         |

|              |                                 |                                                                |                          |              |
|--------------|---------------------------------|----------------------------------------------------------------|--------------------------|--------------|
| LOC100130015 | NR_027335                       | 5-hydroxyisourate hydrolase pseudogene                         | -3.2691438               | down         |
| FLJ42392     | NR_033877                       | uncharacterized LOC400123                                      | -3.263585                | down         |
| FAM180B      | NM_001164379                    | family with sequence similarity 180,<br>member B               | -3.2609055               | down         |
|              | AK309505                        |                                                                | -3.242605                | down         |
| FLJ42022     | AK124016                        | uncharacterized LOC646748                                      | -3.2342017               | down         |
| BPIFA1       | NM_130852                       | BPI fold containing family A, member 1                         | -3.233667                | down         |
| LOC100134868 | NR_004846                       | uncharacterized LOC100134868                                   | -3.2231336               | down         |
| IGSF21       | NM_032880                       | immunoglobulin superfamily, member 21                          | -3.220779                | down         |
| LINC00467    | NR_026761                       | long intergenic non-protein coding RNA 467                     | -3.2171037               | down         |
| METTTL21A    | NM_145280///NM_00112739<br>5    | methyltransferase like 21A                                     | -3.2161102               | down         |
| VPS37D       | NM_001077621                    | vacuolar protein sorting 37 homolog D ( <i>S. cerevisiae</i> ) | -3.208353                | down         |
| TTC28        | NM_001145418                    | tetratricopeptide repeat domain 28                             | -3.207271                | down         |
| LOC100509196 | XM_003119833                    | putative uncharacterized protein encoded<br>by NCRNA00205-like | -3.2044818               | down         |
| LOC100130175 | AK125829                        | uncharacterized LOC100130175                                   | -3.199861                | down         |
| LOC100233209 | NR_026544                       | uncharacterized LOC100233209                                   | -3.1969006               | down         |
| UMODL1       | AB096971<br>AY927536            | uromodulin-like 1                                              | -3.1875017<br>-3.1818442 | down<br>down |
| TNC          | NM_002160                       | tenascin C                                                     | -3.1592815               | down         |
| CTNS         |                                 | cystinosis, lysosomal cystine transporter                      | -3.1545734               | down         |
| ANO2         | NM_020373                       | anoctamin 2                                                    | -3.1503232               | down         |
| TGM7         | NM_052955                       | transglutaminase 7                                             | -3.1474361               | down         |
| KLK10        | NM_002776                       | kallikrein-related peptidase 10                                | -3.1438987               | down         |
| TOX2         | NM_032883                       | TOX high mobility group box family member<br>2                 | -3.1425915               | down         |
| AMZ1         | NM_133463                       | archaelysin family metallopeptidase 1                          | -3.1391256               | down         |
| LOC100130453 | AK123920                        | uncharacterized LOC100130453                                   | -3.137412                | down         |
| RAP1GAP      | NM_002885                       | RAP1 GTPase activating protein                                 | -3.1310093               | down         |
| TCEAL2       | NM_080390                       | transcription elongation factor A (SII)-like 2                 | -3.1228952               | down         |
| ADAD2        | NM_139174                       | adenosine deaminase domain containing 2                        | -3.1180933               | down         |
|              | AK130724                        |                                                                | -3.1152065               | down         |
| NPY          | NM_000905                       | neuropeptide Y                                                 | -3.1149602               | down         |
| C9orf96      | NM_153710                       | chromosome 9 open reading frame 96                             | -3.114468                | down         |
| LOC649294    | AK091259                        | uncharacterized LOC649294                                      | -3.1127348               | down         |
| LOC100128851 | AK127423                        | uncharacterized LOC100128851                                   | -3.1016989               | down         |
| HIP1         | AY358103                        | huntingtin interacting protein 1                               | -3.0990822               | down         |
| KRBA2        | NM_213597                       | KRAB-A domain containing 2                                     | -3.0931094               | down         |
| LOC440910    | NR_030728                       | uncharacterized LOC440910                                      | -3.0913005               | down         |
| GH1          | NM_000515                       | growth hormone 1                                               | -3.0904567               | down         |
| SCN5A        | NM_001160161///NM_00109<br>9404 | sodium channel, voltage-gated, type V,<br>alpha subunit        | -3.0878847               | down         |
| OR10H1       | NM_013940                       | olfactory receptor, family 10, subfamily H,<br>member 1        | -3.0812497               | down         |
| LOC151171    | NR_037809                       | uncharacterized LOC151171                                      | -3.0728755               | down         |
| SNAR-A3      | NR_024214                       | small ILF3/NF90-associated RNA A3                              | -3.0648012               | down         |
| KLK6         | NM_001012964<br>AK130019        | kallikrein-related peptidase 6                                 | -3.0550961<br>-3.050063  | down<br>down |

|               |                       |                                                                                                      |            |      |
|---------------|-----------------------|------------------------------------------------------------------------------------------------------|------------|------|
|               | AK128820              |                                                                                                      | -3.048331  | down |
| SMARCA1       | NM_003069             | SWI/SNF related, matrix associated, actin dependent regulator of chromatin, subfamily a, member 1    | -3.045075  | down |
| RPL23AP64     | NR_003040             | ribosomal protein L23a pseudogene 64                                                                 | -3.045053  | down |
| LOC440461     | NR_027283             | Rho GTPase activating protein 27 pseudogene                                                          | -3.0416405 | down |
| TAF5L         |                       | TAF5-like RNA polymerase II, p300/CBP-associated factor (PCAF)-associated factor, 65kDa              | -3.0314069 | down |
|               | AK128523              |                                                                                                      | -3.0263355 | down |
| C21orf88      | NR_026543///NR_026542 | chromosome 21 open reading frame 88                                                                  | -3.0261002 | down |
|               | XR_112969             |                                                                                                      | -3.0252192 | down |
| KCNQ1OT1      | NR_002728             | KCNQ1 opposite strand/antisense transcript 1 (non-protein coding)                                    | -3.0212224 | down |
|               | AK094078              |                                                                                                      | -3.0137305 | down |
| CNTN6         | NM_014461             | contactin 6                                                                                          | -3.0039775 | down |
| TPRX1         | NM_198479             | tetra-peptide repeat homeobox 1                                                                      | -2.9983547 | down |
| LOC100130987  | NR_024469             | uncharacterized LOC100130987                                                                         | -2.9896526 | down |
|               | C14orf167             | chromosome 14 open reading frame 167                                                                 | -2.9855416 | down |
|               | CD674797              |                                                                                                      | -2.9718642 | down |
| LOC100128644  | XR_110032             | LMNE6487                                                                                             | -2.963439  | down |
| ANKRD36B      | NM_025190             | ankyrin repeat domain 36B                                                                            | -2.963027  | down |
| KRTAP12-2     | NM_181684             | keratin associated protein 12-2                                                                      | -2.9618137 | down |
| LOC644093     | XR_132708             | hCG2040054                                                                                           | -2.9559996 | down |
| MAP6          | NM_207577             | microtubule-associated protein 6                                                                     | -2.954796  | down |
| LOC652586     | XM_001719844          | uncharacterized LOC652586                                                                            | -2.9513712 | down |
| LOC400752     | NR_024270             | uncharacterized LOC400752                                                                            | -2.9489892 | down |
| AMMECR1       | NM_001171689          | Alport syndrome, mental retardation, midface hypoplasia and elliptocytosis chromosomal region gene 1 | -2.9474378 | down |
| HYDIN2        | XR_133104             | hydrocephalus inducing homolog 2 (mouse)                                                             | -2.9408126 | down |
| BOD1P         | BM559531              | bioorientation of chromosomes in cell division 1 pseudogene                                          | -2.9368014 | down |
| CCDC149       | NM_173463///AL834257  | coiled-coil domain containing 149                                                                    | -2.9340742 | down |
| ADCYAP1R1     | NM_001118             | adenylate cyclase activating polypeptide 1 (pituitary) receptor type I                               | -2.9194582 | down |
| GPC2          | NM_152742             | glypican 2                                                                                           | -2.9160316 | down |
| psiTPTE22     | NR_001591             | TPTE pseudogene                                                                                      | -2.8998117 | down |
| PCDHGC5       | NM_032407             | protocadherin gamma subfamily C, 5                                                                   | -2.8901749 | down |
| SPPL2B        | NM_152988             | signal peptide peptidase-like 2B                                                                     | -2.889194  | down |
| BEX1          | NM_018476             | brain expressed, X-linked 1                                                                          | -2.880442  | down |
| DLK2          | NM_206539             | delta-like 2 homolog (Drosophila)                                                                    | -2.8770752 | down |
| LOC100128818  | XR_109738             | LPEQ6126                                                                                             | -2.8560507 | down |
| FLJ13773      | AK023835              | FLJ13773                                                                                             | -2.8553648 | down |
| H2AFB2        | NM_001017991          | H2A histone family, member B2                                                                        | -2.8528192 | down |
| KRT35         | NM_002280             | keratin 35                                                                                           | -2.8473141 | down |
| C10orf91      | NM_173541             | chromosome 10 open reading frame 91                                                                  | -2.8469021 | down |
| RP11-165H20.1 | NR_003928             | CHIA-like pseudogene                                                                                 | -2.8442988 | down |
| CYP1A2        | NM_000761             | cytochrome P450, family 1, subfamily A, polypeptide 2                                                | -2.843859  | down |
| LPHN1         | NM_001008701          | latrophilin 1                                                                                        | -2.8404775 | down |

|           |                       |                                                                                                       |            |      |
|-----------|-----------------------|-------------------------------------------------------------------------------------------------------|------------|------|
| RAPGEF3   | U78169                | Rap guanine nucleotide exchange factor (GEF) 3                                                        | -2.8392982 | down |
|           | AJ295982              |                                                                                                       | -2.8383412 | down |
| KIAA0125  | NR_026800             | KIAA0125                                                                                              | -2.8363616 | down |
| FRMD4A    | NM_018027             | FERM domain containing 4A                                                                             | -2.824559  | down |
|           | XM_003118553          |                                                                                                       | -2.8186138 | down |
| GNAL      | NM_002071             | guanine nucleotide binding protein (G protein), alpha activating activity polypeptide, olfactory type | -2.8121302 | down |
| IFNA4     | NM_021068             | interferon, alpha 4                                                                                   | -2.8103843 | down |
| EFCAB10   | BC062748              | EF-hand calcium binding domain 10                                                                     | -2.810281  | down |
|           | AK127505              |                                                                                                       | -2.806459  | down |
|           | DB056001              |                                                                                                       | -2.8032458 | down |
| KRTAP21-1 | NM_181619             | keratin associated protein 21-1                                                                       | -2.8026798 | down |
| KSR2      | NM_173598             | kinase suppressor of ras 2                                                                            | -2.8023064 | down |
| LAMC1     | NM_002293             | laminin, gamma 1 (formerly LAMB2)                                                                     | -2.7998624 | down |
| FFAR1     | NM_005303             | free fatty acid receptor 1                                                                            | -2.7981694 | down |
| RORB      | NM_006914             | RAR-related orphan receptor B                                                                         | -2.7963376 | down |
| C14orf128 | NR_027263             | chromosome 14 open reading frame 128                                                                  | -2.7945726 | down |
| TCF23     | NM_175769             | transcription factor 23                                                                               | -2.7914324 | down |
| LOC729032 | XR_132715             | ribosomal protein L36 pseudogene                                                                      | -2.788074  | down |
| PSORS1C1  | NM_014068             | psoriasis susceptibility 1 candidate 1                                                                | -2.785542  | down |
| LY6G6C    | NM_025261             | lymphocyte antigen 6 complex, locus G6C                                                               | -2.781667  | down |
| KRTAP1-5  | NM_031957             | keratin associated protein 1-5                                                                        | -2.7801375 | down |
| SLC25A16  | BC001407///NM_152707  | solute carrier family 25 (mitochondrial carrier; Graves disease autoantigen), member 16               | -2.7757733 | down |
| DEFB121   | NM_001011878          | defensin, beta 121                                                                                    | -2.7725685 | down |
| GABRB1    | AK296023              | gamma-aminobutyric acid (GABA) A receptor, beta 1                                                     | -2.7698011 | down |
| CHKA      | NM_001277             | choline kinase alpha                                                                                  | -2.7688966 | down |
| CRYGN     | NM_144727             | crystallin, gamma N                                                                                   | -2.7666614 | down |
| ERVFRD-2  | AK127846              | endogenous retrovirus group FRD, member 2                                                             | -2.763434  | down |
| FLJ31662  | NR_033966             | uncharacterized LOC440594                                                                             | -2.7625144 | down |
| DCLK2     | NM_001040261          | doublecortin-like kinase 2                                                                            | -2.7607162 | down |
| RASGRF2   | NM_006909             | Ras protein-specific guanine nucleotide-releasing factor 2                                            | -2.7606442 | down |
| HERC2P7   | AF071178///XR_133065  | hect domain and RLD 2 pseudogene 7                                                                    | -2.7562346 | down |
| APOC4     | NM_001646             | apolipoprotein C-IV                                                                                   | -2.753569  | down |
| LOC442421 | NR_024496             | uncharacterized LOC442421                                                                             | -2.753157  | down |
| CEP72     | NM_018140             | centrosomal protein 72kDa                                                                             | -2.7498465 | down |
| NRSN1     |                       | neurensin 1                                                                                           | -2.7442598 | down |
| IRX2      | NM_033267             | iroquois homeobox 2                                                                                   | -2.7434125 | down |
| KLK5      | NM_012427             | kallikrein-related peptidase 5                                                                        | -2.7384646 | down |
| CBWD7     | AK097639              | COBW domain containing 7                                                                              | -2.7370837 | down |
| SLFN5     | NM_144975             | schlafen family member 5                                                                              | -2.7370715 | down |
| FLJ10661  | NR_024362///NR_024361 | family with sequence similarity 86, member A pseudogene                                               | -2.728295  | down |
| KGFLP2    | NR_003670             | keratinocyte growth factor-like protein 2                                                             | -2.7273145 | down |
| PALM3     | NM_001145028          | paralemmin 3                                                                                          | -2.724795  | down |
| ODF2L     | NM_001007022          | outer dense fiber of sperm tails 2-like                                                               | -2.72029   | down |
| FLJ46906  | NR_033896             | uncharacterized LOC441172                                                                             | -2.719882  | down |
| HGDFRP2   | NM_032631///AB208892  | hepatoma-derived growth factor-related protein 2                                                      | -2.7197547 | down |
| OR10J5    | NM_001004469          | olfactory receptor, family 10, subfamily J, member 5                                                  | -2.7189047 | down |

|              |                       |                                                                          |            |      |
|--------------|-----------------------|--------------------------------------------------------------------------|------------|------|
| MUC6         | NM_005961<br>CU687439 | mucin 6, oligomeric mucus/gel-forming                                    | -2.7174659 | down |
| MARGPRE      | NM_001039165          | MAS-related GPR, member E                                                | -2.7119572 | down |
| GRIA4        | NM_001077243          | glutamate receptor, ionotropic, AMPA 4                                   | -2.7108667 | down |
| LZTS2        | AK097997///NM_032429  | leucine zipper, putative tumor suppressor 2                              | -2.710476  | down |
| FAM155B      | NM_015686             | family with sequence similarity 155, member B                            | -2.709032  | down |
| GPR144       | NM_001161808          | G protein-coupled receptor 144                                           | -2.7072523 | down |
| DEFB108B     | NM_001002035          | defensin, beta 108B                                                      | -2.7050786 | down |
| C4orf39      | NM_153027             | chromosome 4 open reading frame 39                                       | -2.704934  | down |
| SLC16A13     | NM_201566             | solute carrier family 16, member 13 (monocarboxylic acid transporter 13) | -2.7010362 | down |
| FAM27A       | NR_024060             | family with sequence similarity 27, member A                             | -2.6990807 | down |
| CENPF        | NM_016343             | centromere protein F, 350/400kDa (mitosin)                               | -2.697138  | down |
| LIPM         | NM_001128215          | lipase, family member M                                                  | -2.695125  | down |
| HAU55        | NM_015302             | HAUS augmin-like complex, subunit 5                                      | -2.6927483 | down |
| MGC10814     | BC004943              | uncharacterized protein MGC10814                                         | -2.687813  | down |
|              | XR_108874             |                                                                          | -2.684743  | down |
| LOC284373    | BX537909              | uncharacterized LOC284373                                                | -2.682722  | down |
| FCN3         | AK309540///NM_003665  | ficolin (collagen/fibrinogen domain containing) 3 (Hakata antigen)       | -2.6824653 | down |
| GDF7         | NM_182828             | growth differentiation factor 7                                          | -2.67323   | down |
| MARGPRX4     | NM_054032             | MAS-related GPR, member X4                                               | -2.6724622 | down |
|              | XR_109126             |                                                                          | -2.672053  | down |
| SUZ12P       | BC047718              | suppressor of zeste 12 homolog pseudogene                                | -2.6694243 | down |
| LOC400043    | NR_026656             | uncharacterized LOC400043                                                | -2.6686485 | down |
| DNA2         | NM_001080449          | DNA replication helicase 2 homolog (yeast)                               | -2.6659276 | down |
| O3FAR1       | NM_181745             | omega-3 fatty acid receptor 1                                            | -2.664836  | down |
| HMP19        | NM_015980             | HMP19 protein                                                            | -2.6647341 | down |
|              | AK093443              |                                                                          | -2.6609523 | down |
| CDC7         | NM_003503             | cell division cycle 7 homolog (S. cerevisiae)                            | -2.6598022 | down |
| RUFY4        | NM_198483             | RUN and FYVE domain containing 4                                         | -2.6572275 | down |
| LOC100130236 | AK128227              | uncharacterized LOC100130236                                             | -2.6548076 | down |
| CDC6         | NM_001254             | cell division cycle 6 homolog (S. cerevisiae)                            | -2.6420462 | down |
| TEKT2        | NM_014466             | tektin 2 (testicular)                                                    | -2.641182  | down |
| CAPN5        | NM_004055             | calpain 5                                                                | -2.6409423 | down |
|              | AK125780              |                                                                          | -2.637878  | down |
| ZNF763       | NM_001012753          | zinc finger protein 763                                                  | -2.6329584 | down |
| GLYCTK       | NM_001144951          | glycerate kinase                                                         | -2.6321416 | down |
| GCG          | NM_002054             | glucagon                                                                 | -2.631446  | down |
| MAPK8        | NM_139047             | mitogen-activated protein kinase 8                                       | -2.6304858 | down |
| KRTAP10-2    | NM_198693             | keratin associated protein 10-2                                          | -2.6304023 | down |
| LACTBL1      | XM_002342035          | lactamase, beta-like 1                                                   | -2.6256578 | down |
| TAAR8        | NM_053278             | trace amine associated receptor 8                                        | -2.621925  | down |
| ZNF562       | NM_017656             | zinc finger protein 562                                                  | -2.6172392 | down |
| LOC100130768 | AK128224              | uncharacterized LOC100130768                                             | -2.616366  | down |
| MFSD2B       | NM_001080473          | major facilitator superfamily domain containing 2B                       | -2.6144173 | down |
| VCX2         | NM_016378             | variable charge, X-linked 2                                              | -2.6070209 | down |

|              |                              |                                                                   |            |      |
|--------------|------------------------------|-------------------------------------------------------------------|------------|------|
| NOL3         | NM_003946                    | nucleolar protein 3 (apoptosis repressor with CARD domain)        | -2.603689  | down |
| GRIK5        | NM_002088                    | glutamate receptor, ionotropic, kainate 5                         | -2.6029408 | down |
| RXFP3        | NM_016568                    | relaxin/insulin-like family peptide receptor 3                    | -2.6019537 | down |
| SMTN         | NM_134269                    | smoothelin                                                        | -2.598266  | down |
| ZNF527       | BC014325                     | zinc finger protein 527                                           | -2.5981786 | down |
| SH3GL1P3     | X99663                       | SH3-domain GRB2-like 1 pseudogene 3                               | -2.5894454 | down |
| LIN28B       | NM_001004317                 | lin-28 homolog B (C. elegans)                                     | -2.5886908 | down |
|              | XM_001129515                 |                                                                   | -2.5876904 | down |
| ARL17A       | NM_016632                    | ADP-ribosylation factor-like 17A                                  | -2.5871973 | down |
| VSIG7        | XM_003403542                 | V-set and immunoglobulin domain containing 7                      | -2.5851786 | down |
| GPR62        | NM_080865                    | G protein-coupled receptor 62                                     | -2.5824215 | down |
| LOC283693    | NR_036446                    | actin, gamma pseudogene                                           | -2.582228  | down |
| C6orf208     | NR_026780                    | chromosome 6 open reading frame 208                               | -2.5815573 | down |
| GCLM         | NM_002061                    | glutamate-cysteine ligase, modifier subunit                       | -2.5814161 | down |
| IGF2-AS      | NR_028044                    | insulin-like growth factor 2 antisense (non-protein coding)       | -2.5720792 | down |
| LOC100130285 | XR_109235                    | uncharacterized LOC100130285                                      | -2.5712218 | down |
| ACTL8        | NM_030812                    | actin-like 8                                                      | -2.5686913 | down |
| BEST4        | NM_153274                    | bestrophin 4                                                      | -2.5667307 | down |
| COL4A6       | BT007228                     | collagen, type IV, alpha 6                                        | -2.565813  | down |
| LOC100144604 | NR_021493                    | uncharacterized LOC100144604                                      | -2.5642583 | down |
| OR10C1       | NM_013941                    | olfactory receptor, family 10, subfamily C, member 1              | -2.558106  | down |
| GPHA2        | NM_130769                    | glycoprotein hormone alpha 2                                      | -2.553818  | down |
| MST1R        | NM_002447                    | macrophage stimulating 1 receptor (c-met-related tyrosine kinase) | -2.5493414 | down |
|              | AK093659                     |                                                                   | -2.5483825 | down |
| LOC200261    | NR_034149                    | uncharacterized LOC200261                                         | -2.5465016 | down |
| BCMO1        | NM_017429                    | beta-carotene 15,15'-monooxygenase 1                              | -2.544161  | down |
| DPF1         | NM_001135155                 | D4, zinc and double PHD fingers family 1                          | -2.543376  | down |
| CACNA2D1     | NM_000722                    | calcium channel, voltage-dependent, alpha 2/delta subunit 1       | -2.541569  | down |
| LOC440896    | NR_015361                    | uncharacterized LOC440896                                         | -2.540988  | down |
| AUTS2        | NM_015570///NM_00112723<br>2 | autism susceptibility candidate 2                                 | -2.5362935 | down |
| GOLGA8IP     | NR_024074                    | golgin A8 family, member 1, pseudogene                            | -2.536184  | down |
| KRTAP5-5     | NM_001001480                 | keratin associated protein 5-5                                    | -2.5331464 | down |
|              | AK056269                     |                                                                   | -2.532334  | down |
| GLI2         | NM_005270                    | GLI family zinc finger 2                                          | -2.5322402 | down |
| D21S2088E    | NR_040254                    | D21S2088E                                                         | -2.5296218 | down |
| LOC100131015 | AK124509                     | uncharacterized LOC100131015                                      | -2.527658  | down |
| LOC100507205 | NR_038309                    | uncharacterized LOC100507205                                      | -2.5262938 | down |
| LOC400499    | XM_003118689                 | uncharacterized LOC400499                                         | -2.5256298 | down |
| ST8SIA3      | NM_015879                    | ST8 alpha-N-acetyl-neuraminide alpha-2,8-sialyltransferase 3      | -2.522339  | down |
| CTSE         | NM_001910                    | cathepsin E                                                       | -2.521859  | down |
| SPRR2F       | NM_001014450                 | small proline-rich protein 2F                                     | -2.5202756 | down |
| CELF6        | NM_001172684                 | CUGBP, Elav-like family member 6                                  | -2.5196774 | down |



|              |                         |                                                                    |            |      |
|--------------|-------------------------|--------------------------------------------------------------------|------------|------|
| CYP2F1       | NM_000774               | cytochrome P450, family 2, subfamily F, polypeptide 1              | -2.5166054 | down |
| LOC170425    | NR_038220               | uncharacterized LOC170425                                          | -2.5158978 | down |
| RGS11        | NM_003834               | regulator of G-protein signaling 11                                | -2.5146346 | down |
| LOC494150    | BC014228                | prohibitin pseudogene                                              | -2.5127451 | down |
| ZNF683       | NM_001114759            | zinc finger protein 683                                            | -2.5126276 | down |
| CEACAM8      | NM_001816               | carcinoembryonic antigen-related cell adhesion molecule 8          | -2.5116963 | down |
| KIAA1919     | NM_153369               | KIAA1919                                                           | -2.5078835 | down |
| LOC100130913 | AK128355                | uncharacterized LOC100130913                                       | -2.5026677 | down |
| OPRL1        | NM_182647               | opiate receptor-like 1                                             | -2.4988651 | down |
| LOC644285    | AK126853                | uncharacterized LOC644285                                          | -2.4981222 | down |
| KCTD11       | NM_001002914            | potassium channel tetramerisation domain containing 11             | -2.4954853 | down |
| FAM171A2     | NM_198475               | family with sequence similarity 171, member A2                     | -2.4954185 | down |
| TCTE1        | NM_182539               | t-complex-associated-testis-expressed 1                            | -2.494768  | down |
| LOC100130078 | AK094659                | uncharacterized LOC100130078                                       | -2.4942832 | down |
| C4BPA        | NM_000715               | complement component 4 binding protein, alpha                      | -2.4921403 | down |
| AQP8         | NM_001169               | aquaporin 8                                                        | -2.48934   | down |
| BHLHA15      | NM_177455               | basic helix-loop-helix family, member a15                          | -2.4891992 | down |
| LOC100130539 | XM_001724322            | uncharacterized LOC100130539                                       | -2.4865284 | down |
| KRT18        | NM_000224               | keratin 18                                                         | -2.4853084 | down |
|              | AK124642                |                                                                    | -2.4835212 | down |
| SIX2         | NM_016932               | SIX homeobox 2                                                     | -2.4783657 | down |
|              | AK056856                |                                                                    | -2.4768996 | down |
| FHL2         | NM_001039492///CR936682 | four and a half LIM domains 2                                      | -2.4763184 | down |
| CDCA7        | NM_031942               | cell division cycle associated 7                                   | -2.4757226 | down |
| LHFPL4       | NM_198560               | lipoma HMGIC fusion partner-like 4                                 | -2.4756093 | down |
| SULT1C2P1    | NR_037191               | sulfotransferase family, cytosolic, 1C, member 2 pseudogene 1      | -2.4747286 | down |
| EFCAB5       | NM_001145053            | EF-hand calcium binding domain 5                                   | -2.4736834 | down |
| MACROD2      | BC035876///NM_080676    | MACRO domain containing 2                                          | -2.4698927 | down |
| TSL          | AB050003                | testis-expressed, seven-twelve, leukemia                           | -2.466147  | down |
| FAM160A1     | NM_001109977            | family with sequence similarity 160, member A1                     | -2.465684  | down |
|              | XR_110878               |                                                                    | -2.4619625 | down |
| SPRR3        | NM_005416               | small proline-rich protein 3                                       | -2.4597776 | down |
| C9orf24      | NM_032596               | chromosome 9 open reading frame 24                                 | -2.4568412 | down |
| TNRC6C       | NM_001142640            | trinucleotide repeat containing 6C                                 | -2.4550312 | down |
|              | AL832737                |                                                                    | -2.454463  | down |
| TRPM3        | NM_001007471            | transient receptor potential cation channel, subfamily M, member 3 | -2.4535666 | down |
| CSH1         | NM_001317               | chorionic somatomammotropin hormone 1 (placental lactogen)         | -2.4519737 | down |
| CYP2B6       | NM_000767               | cytochrome P450, family 2, subfamily B, polypeptide 6              | -2.4499354 | down |
| LOC393078    | XR_108716               | uncharacterized LOC393078                                          | -2.4493845 | down |
| ANKRD53      | NM_024933               | ankyrin repeat domain 53                                           | -2.4476876 | down |
| C12orf34     | NM_032829               | chromosome 12 open reading frame 34                                | -2.4452784 | down |
| PPP6R1       | NM_014931               | protein phosphatase 6, regulatory subunit 1                        | -2.4439967 | down |
| LCN8         | BC042109                | lipocalin 8                                                        | -2.4424543 | down |

|           |                       |                                                                                           |            |      |
|-----------|-----------------------|-------------------------------------------------------------------------------------------|------------|------|
| LOC153811 | AK021734              | uncharacterized LOC153811                                                                 | -2.4395025 | down |
| PLAC9     |                       | placenta-specific 9                                                                       | -2.4391804 | down |
| C5orf49   | NM_001089584          | chromosome 5 open reading frame 49                                                        | -2.4347346 | down |
| GEMIN2    | NM_003616             | gem (nuclear organelle) associated protein 2                                              | -2.427462  | down |
|           | AK025312              |                                                                                           | -2.4272277 | down |
|           | BC043411              |                                                                                           | -2.426614  | down |
| RAB40AL   | NM_001031834          | RAB40A, member RAS oncogene family-like                                                   | -2.425677  | down |
| FAM187B   | NM_152481             | family with sequence similarity 187, member B                                             | -2.425212  | down |
| OR7C2     | NM_012377             | olfactory receptor, family 7, subfamily C, member 2                                       | -2.4243827 | down |
| PLCH2     | NM_014638             | phospholipase C, eta 2                                                                    | -2.4240437 | down |
| TBXA2R    | NM_201636///NM_001060 | thromboxane A2 receptor                                                                   | -2.4230893 | down |
| TEX101    | NM_031451             | testis expressed 101                                                                      | -2.418484  | down |
| RHBG      | NM_020407             | Rh family, B glycoprotein (gene/pseudogene)                                               | -2.4132702 | down |
| FAM57B    | NM_031478             | family with sequence similarity 57, member B                                              | -2.4115717 | down |
| KCNN2     | NM_021614             | potassium intermediate/small conductance calcium-activated channel, subfamily N, member 2 | -2.408999  | down |
| SPRY4     | NM_030964             | sprouty homolog 4 (Drosophila)                                                            | -2.407378  | down |
| ZNF169    | NM_194320             | zinc finger protein 169                                                                   | -2.4068968 | down |
| FOXRED2   | NM_024955             | FAD-dependent oxidoreductase domain containing 2                                          | -2.4057827 | down |
| TYRO3     | NM_006293             | TYRO3 protein tyrosine kinase                                                             | -2.4029422 | down |
| LCNL1     | NM_207510             | lipocalin-like 1                                                                          | -2.402745  | down |
| LOC644794 | XR_133450             | uncharacterized LOC644794                                                                 | -2.401635  | down |
| LOC152024 | NR_026834             | uncharacterized LOC152024                                                                 | -2.401567  | down |
| CHRNA6    | NM_004198             | cholinergic receptor, nicotinic, alpha 6                                                  | -2.3993444 | down |
| F11       | NM_000128             | coagulation factor XI                                                                     | -2.3980606 | down |
| FLJ36777  | AK094096              | uncharacterized LOC730971                                                                 | -2.3969283 | down |
| KLK9      | NM_012315             | kallikrein-related peptidase 9                                                            | -2.3933306 | down |
| YY2       | NM_206923             | YY2 transcription factor                                                                  | -2.391668  | down |
| KISS1     | NM_002256             | KISS-1 metastasis-suppressor                                                              | -2.3910356 | down |
|           | AK127825              |                                                                                           | -2.3894765 | down |
| C1QTNF9B  | NM_001007537          | C1q and tumor necrosis factor related protein 9B                                          | -2.3884475 | down |
|           | AK092531              |                                                                                           | -2.3856747 | down |
| ANKMY2    | NM_020319             | ankyrin repeat and MYND domain containing 2                                               | -2.3828273 | down |
| GHRLOS    | NR_004431             | ghrelin opposite strand/antisense RNA (non-protein coding)                                | -2.376792  | down |
| INTU      | NM_015693             | inturned planar cell polarity effector homolog (Drosophila)                               | -2.3756533 | down |
| DEFA4     | NM_001925             | defensin, alpha 4, corticostatin                                                          | -2.3721945 | down |
| HIST1H2AB | NM_003513             | histone cluster 1, H2ab                                                                   | -2.3720171 | down |
| DUSP9     | NM_001395             | dual specificity phosphatase 9                                                            | -2.3712244 | down |
| SIGLEC16  | NR_002825             | sialic acid binding Ig-like lectin 16 (gene/pseudogene)                                   | -2.3707201 | down |
| MAP3K10   | NM_002446             | mitogen-activated protein kinase kinase kinase 10                                         | -2.3705287 | down |
| PTGER3    | NM_198715             | prostaglandin E receptor 3 (subtype EP3)                                                  | -2.3690603 | down |
| LOC284628 | AK094692              | uncharacterized LOC284628                                                                 | -2.3656733 | down |
| KRTAP4-8  | NM_031960             | keratin associated protein 4-8                                                            | -2.362244  | down |
| FOLR4     | NM_001199206          | folate receptor 4 (delta) homolog (mouse)                                                 | -2.3619516 | down |

|              |                             |                                                                           |            |      |
|--------------|-----------------------------|---------------------------------------------------------------------------|------------|------|
|              | BF733045                    |                                                                           | -2.3607671 | down |
|              | BE613848                    |                                                                           | -2.3578959 | down |
|              | X81001                      |                                                                           | -2.3565495 | down |
| LOC203274    | BC110369                    | uncharacterized LOC203274                                                 | -2.3564928 | down |
|              | XM_001727011                |                                                                           | -2.3555954 | down |
| ZNF865       | NM_001195605                | zinc finger protein 865                                                   | -2.3541124 | down |
| SLC9A3R2     | NM_004785                   | solute carrier family 9 (sodium/hydrogen exchanger), member 3 regulator 2 | -2.35131   | down |
| GFRA2        | NM_001495                   | GDNF family receptor alpha 2                                              | -2.3501434 | down |
| MTMR8        | NM_017677                   | myotubularin related protein 8                                            | -2.3499327 | down |
| FAM179A      |                             | family with sequence similarity 179, member A                             | -2.3449762 | down |
| C3orf54      | NM_203370                   | chromosome 3 open reading frame 54                                        | -2.3424883 | down |
| FER1L6-AS1   | NR_040044                   | FER1L6 antisense RNA 1 (non-protein coding)                               | -2.3423638 | down |
| KRT26        | NM_181539                   | keratin 26                                                                | -2.338993  | down |
| TMEM9B       | NM_020644                   | TMEM9 domain family, member B                                             | -2.3321023 | down |
| FOXD2        | NM_004474                   | forkhead box D2                                                           | -2.3300383 | down |
| SRCIN1       | BC033233                    | SRC kinase signaling inhibitor 1                                          | -2.329657  | down |
| FAM22D       | NM_001009610                | family with sequence similarity 22, member D                              | -2.3294964 | down |
| OR7E91P      | NR_002185                   | olfactory receptor, family 7, subfamily E, member 91 pseudogene           | -2.329453  | down |
| GREB1        | NM_148903                   | growth regulation by estrogen in breast cancer 1                          | -2.3273413 | down |
| TP53TG3      | NM_016212                   | TP53 target 3                                                             | -2.3255098 | down |
| LOC728254    | AB002446                    | uncharacterized LOC728254                                                 | -2.3216484 | down |
| ARL5C        | NM_001143968                | ADP-ribosylation factor-like 5C                                           | -2.3181145 | down |
| TPD52        | XM_001716081///NM_001025252 | tumor protein D52                                                         | -2.3178868 | down |
|              | AK130324                    |                                                                           | -2.317654  | down |
| GNN          | NR_027249                   | Grp94 neighboring nucleotidase pseudogene                                 | -2.3171926 | down |
| CCR6         | NM_031409                   | chemokine (C-C motif) receptor 6                                          | -2.316728  | down |
| LOC100190939 | NR_024458                   | uncharacterized LOC100190939                                              | -2.3166418 | down |
| MDGA2        | NM_001113498                | MAM domain containing glycosylphosphatidylinositol anchor 2               | -2.3162284 | down |
| TSEN15       | NM_052965                   | tRNA splicing endonuclease 15 homolog (S. cerevisiae)                     | -2.31487   | down |
|              | AK123797                    |                                                                           | -2.313963  | down |
|              | DA734585                    |                                                                           | -2.3134992 | down |
| TRIM67       | NM_001004342                | tripartite motif containing 67                                            | -2.3130445 | down |
| GIN1         | NM_017676                   | gypsy retrotransposon integrase 1                                         | -2.3106217 | down |
| HIST1H4B     | NM_003544                   | histone cluster 1, H4b                                                    | -2.3097599 | down |
| RPS10P7      | NR_026667                   | ribosomal protein S10 pseudogene 7                                        | -2.3089738 | down |
| CEACAM18     | NM_001080405                | carcinoembryonic antigen-related cell adhesion molecule 18                | -2.3075693 | down |
| SLC12A5      | AK098371                    | solute carrier family 12 (potassium/chloride transporter), member 5       | -2.300993  | down |
| FKSG2        | AF300871                    | tumor protein, translationally-controlled 1 pseudogene                    | -2.2998195 | down |
| LOC388387    | NR_027254                   | uncharacterized LOC388387                                                 | -2.2971892 | down |
| ERBB3        | NM_001982                   | v-erb-b2 erythroblastic leukemia viral oncogene homolog 3 (avian)         | -2.2963245 | down |
| LOC100128551 | AK125148                    | uncharacterized LOC100128551                                              | -2.2947125 | down |
| MGC11082     | BC094703                    | uncharacterized LOC84777                                                  | -2.28615   | down |

|              |                                    |                                                                        |                          |              |
|--------------|------------------------------------|------------------------------------------------------------------------|--------------------------|--------------|
| AMBN         | NM_016519                          | ameloblastin (enamel matrix protein)                                   | -2.2857258               | down         |
| DEFB104B     | NM_001040702                       | defensin, beta 104B                                                    | -2.2809145               | down         |
| ADAM7        | NM_003817                          | ADAM metallopeptidase domain 7                                         | -2.2803962               | down         |
| GPRC5B       | NM_016235                          | G protein-coupled receptor, family C, group 5, member B                | -2.2778149               | down         |
| REXO1L1      | NM_172239                          | REX1, RNA exonuclease 1 homolog (S. cerevisiae)-like 1                 | -2.2776148               | down         |
| CHRND        | NM_000751                          | cholinergic receptor, nicotinic, delta                                 | -2.2767553               | down         |
| LOC100130872 | NR_024569                          | uncharacterized LOC100130872                                           | -2.2761073               | down         |
| XRCC3        | NM_001100119                       | X-ray repair complementing defective repair in Chinese hamster cells 3 | -2.2753365               | down         |
| HSCB         | NM_172002                          | HscB iron-sulfur cluster co-chaperone homolog (E. coli)                | -2.2748752               | down         |
| LOC100130745 | AK128206                           | uncharacterized LOC100130745                                           | -2.2734354               | down         |
| LRRTM1       | NM_178839                          | leucine rich repeat transmembrane neuronal 1                           | -2.2716744               | down         |
| TSHB         | NM_000549                          | thyroid stimulating hormone, beta                                      | -2.2709882               | down         |
| DNPEP        | NM_012100                          | aspartyl aminopeptidase                                                | -2.2689023               | down         |
| CNPY1        | NM_001103176                       | canopy 1 homolog (zebrafish)                                           | -2.2679706               | down         |
| KRTAP10-6    | NM_198688                          | keratin associated protein 10-6                                        | -2.2661133               | down         |
| SLC2A10      | NM_030777                          | solute carrier family 2 (facilitated glucose transporter), member 10   | -2.265758                | down         |
| TMEM191C     | AK308704                           | transmembrane protein 191C                                             | -2.2651885               | down         |
| CUX2         | NM_015267                          | cut-like homeobox 2                                                    | -2.264672                | down         |
| SMPDL3B      | NM_001009568                       | sphingomyelin phosphodiesterase, acid-like 3B                          | -2.2633882               | down         |
| SYCE1L       | NM_001129979                       | synaptonemal complex central element protein 1-like                    | -2.260511                | down         |
| LOC100128946 | NR_038944                          | uncharacterized LOC100128946                                           | -2.2601676               | down         |
| PDGFA        | NM_033023                          | platelet-derived growth factor alpha polypeptide                       | -2.260119                | down         |
| SERHL2       | NM_014509                          | serine hydrolase-like 2                                                | -2.2583516               | down         |
| DKFZP564C152 | AL049980                           | DKFZP564C152 protein                                                   | -2.2551537               | down         |
| LOC100652995 | XR_132578                          | uncharacterized LOC100652995                                           | -2.2550085               | down         |
| SLC6A16      | NM_014037                          | solute carrier family 6, member 16                                     | -2.2530563               | down         |
| ARHGEF26     | NM_001251962                       | Rho guanine nucleotide exchange factor (GEF) 26                        | -2.2504292               | down         |
| RPL23AP7     | NR_000029///NR_024530<br>XR_113267 | ribosomal protein L23a pseudogene 7                                    | -2.2488248<br>-2.248518  | down<br>down |
| CEND1        | NM_016564                          | cell cycle exit and neuronal differentiation 1                         | -2.248288                | down         |
| LOC286186    | NR_033893                          | uncharacterized LOC286186                                              | -2.245334                | down         |
| LCE3B        | NM_178433<br>BC100776              | late cornified envelope 3B                                             | -2.2447402<br>-2.2444487 | down<br>down |
| AFMID        | NM_001145526                       | arylformamidase                                                        | -2.2444293               | down         |
| LOC100289255 | NR_036581                          | uncharacterized LOC100289255                                           | -2.2443118               | down         |
| SLC5A7       | NM_021815                          | solute carrier family 5 (choline transporter), member 7                | -2.2441318               | down         |
| UCMA         | NM_145314                          | upper zone of growth plate and cartilage matrix associated             | -2.2441084               | down         |
| MUC7         | NM_152291                          | mucin 7, secreted                                                      | -2.2436132               | down         |
| OR5AK4P      | AF309700                           | olfactory receptor, family 5, subfamily AK, member 4 pseudogene        | -2.2369654               | down         |

|              |              |                                                                                    |            |      |
|--------------|--------------|------------------------------------------------------------------------------------|------------|------|
| LINC00487    | NR_038369    | long intergenic non-protein coding RNA 487                                         | -2.2349634 | down |
| SLC30A3      | NM_003459    | solute carrier family 30 (zinc transporter), member 3                              | -2.2326071 | down |
| ELFN2        | NM_052906    | extracellular leucine-rich repeat and fibronectin type III domain containing 2     | -2.2323627 | down |
| LOC100129840 | AK126633     | uncharacterized LOC100129840                                                       | -2.2323372 | down |
| C5orf55      | NM_138464    | chromosome 5 open reading frame 55                                                 | -2.2312827 | down |
| KRTAP19-7    | NM_181614    | keratin associated protein 19-7                                                    | -2.2309666 | down |
| TELO2        | NM_016111    | TEL2, telomere maintenance 2, homolog (S. cerevisiae)                              | -2.230096  | down |
| TAS2R9       | NM_023917    | taste receptor, type 2, member 9                                                   | -2.2295055 | down |
| LINC00085    | NR_024330    | long intergenic non-protein coding RNA 85                                          | -2.2285845 | down |
| LOC728061    | AK025151     | hCG2003663                                                                         | -2.2283885 | down |
| GAL3ST4      | NM_024637    | galactose-3-O-sulfotransferase 4                                                   | -2.2270055 | down |
| PIIP5K1      | NM_001190214 | diphosphoinositol pentakisphosphate kinase 1                                       | -2.226299  | down |
|              | AY444749     |                                                                                    | -2.225928  | down |
| PYCR1        | NM_006907    | pyrroline-5-carboxylate reductase 1                                                | -2.2257733 | down |
| NBPF3        | NM_032264    | neuroblastoma breakpoint family, member 3                                          | -2.2252023 | down |
| LCE3E        | NM_178435    | late cornified envelope 3E                                                         | -2.2242131 | down |
| ZNF496       | NM_032752    | zinc finger protein 496                                                            | -2.2231312 | down |
| KIRREL       | NM_018240    | kin of IRRE like (Drosophila)                                                      | -2.2196777 | down |
|              | AK127153     |                                                                                    | -2.2193358 | down |
| STOX2        | NM_020225    | storkhead box 2                                                                    | -2.2193117 | down |
| TNFRSF13C    | NM_052945    | tumor necrosis factor receptor superfamily, member 13C                             | -2.217435  | down |
| LINC00340    | NR_015410    | long intergenic non-protein coding RNA 340                                         | -2.2140365 | down |
| ANKRD45      | NM_198493    | ankyrin repeat domain 45                                                           | -2.214009  | down |
|              | XR_112173    |                                                                                    | -2.2131727 | down |
| LOC157381    | NR_027321    | uncharacterized LOC157381                                                          | -2.2121453 | down |
| MAPK15       | NM_139021    | mitogen-activated protein kinase 15                                                | -2.2121444 | down |
| LOC642980    | AK131413     | uncharacterized LOC642980                                                          | -2.2121215 | down |
| CACNA1B      | NM_001243812 | calcium channel, voltage-dependent, N type, alpha 1B subunit                       | -2.2114873 | down |
|              | XR_108730    |                                                                                    | -2.21018   | down |
| PPP1R11      | NM_021959    | protein phosphatase 1, regulatory (inhibitor) subunit 11                           | -2.2100499 | down |
| LOC400464    | XR_109229    | uncharacterized LOC400464                                                          | -2.209847  | down |
| PPYR1        | NM_005972    | pancreatic polypeptide receptor 1                                                  | -2.2096689 | down |
|              | BC044628     |                                                                                    | -2.2082832 | down |
| ATP2B1       | NM_001001323 | ATPase, Ca <sup>++</sup> transporting, plasma membrane 1                           | -2.2076125 | down |
| OR5A1        | NM_001004728 | olfactory receptor, family 5, subfamily A, member 1                                | -2.2075155 | down |
| LOC100130700 | NR_034018    | uncharacterized LOC100130700                                                       | -2.2069159 | down |
| REN          | NM_000537    | renin                                                                              | -2.2063065 | down |
| EFCAB4A      | NM_173584    | EF-hand calcium binding domain 4A                                                  | -2.2058685 | down |
| LOC90246     | NR_026954    | uncharacterized LOC90246                                                           | -2.204098  | down |
| NPR1         | NM_000906    | natriuretic peptide receptor A/guanylate cyclase A (atriuretic peptide receptor A) | -2.203831  | down |
| ZNF502       | NM_033210    | zinc finger protein 502                                                            | -2.2026372 | down |
| LOC729852    | NR_034084    | uncharacterized LOC729852                                                          | -2.2017443 | down |
| NLGN2        | NM_020795    | neuroligin 2                                                                       | -2.200254  | down |

|              |                                   |                                                                       |            |      |
|--------------|-----------------------------------|-----------------------------------------------------------------------|------------|------|
| LOC645202    | XM_003403668                      | golgin A6 family-like                                                 | -2.197397  | down |
| LOC283075    | AK096372                          | uncharacterized LOC283075                                             | -2.1970363 | down |
| OR4X2        | NM_001004727                      | olfactory receptor, family 4, subfamily X, member 2                   | -2.1962726 | down |
|              | AB529252                          |                                                                       | -2.1919396 | down |
| CPSF4L       | NM_001129885                      | cleavage and polyadenylation specific factor 4-like                   | -2.191141  | down |
| LOC399753    | AK024156                          | uncharacterized LOC399753                                             | -2.1904354 | down |
| FER1L4       | NR_024377                         | fer-1-like 4 (C. elegans) pseudogene                                  | -2.1879423 | down |
| LOC100130463 | AK124300                          | uncharacterized LOC100130463                                          | -2.1838872 | down |
| HPDL         | NM_032756                         | 4-hydroxyphenylpyruvate dioxygenase-like                              | -2.1826904 | down |
| ALPI         | NM_001631                         | alkaline phosphatase, intestinal                                      | -2.1825242 | down |
| UBE2DNL      | NR_024062                         | ubiquitin-conjugating enzyme E2D N-terminal like (pseudogene)         | -2.1790946 | down |
| LRRC27       | NM_001143757                      | leucine rich repeat containing 27                                     | -2.1782818 | down |
| LOC100132247 | NM_001135865                      | nuclear pore complex interacting protein related gene                 | -2.1763976 | down |
| GPR180       | NM_180989                         | G protein-coupled receptor 180                                        | -2.1761527 | down |
| NXF5         | NM_032946                         | nuclear RNA export factor 5                                           | -2.1750615 | down |
| LOC100129171 | AK131268                          | uncharacterized LOC100129171                                          | -2.1744747 | down |
| C5orf63      | NM_001164479                      | chromosome 5 open reading frame 63                                    | -2.1723661 | down |
|              | AK090403                          |                                                                       | -2.1699007 | down |
| ADAT2        | NM_182503                         | adenosine deaminase, tRNA-specific 2                                  | -2.1682281 | down |
| DNM3         | NM_015569///NM_001136127          | dynamin 3                                                             | -2.1676588 | down |
| DMKN         | NM_001190348                      | dermokine                                                             | -2.1652613 | down |
| FBXO36       | NM_174899                         | F-box protein 36                                                      | -2.1638336 | down |
| C1QTNF5      | NM_015645                         | C1q and tumor necrosis factor related protein 5                       | -2.1635568 | down |
| ZNF569       | NM_152484                         | zinc finger protein 569                                               | -2.1630597 | down |
| C12orf53     | NM_153685                         | chromosome 12 open reading frame 53                                   | -2.1630168 | down |
| CGB2         | NM_033378                         | chorionic gonadotropin, beta polypeptide 2                            | -2.1627414 | down |
| GSTT2B       | NM_001080843                      | glutathione S-transferase theta 2B (gene/pseudogene)                  | -2.162295  | down |
|              | AK131315                          |                                                                       | -2.1620684 | down |
| KRTAP6-1     | NM_181602                         | keratin associated protein 6-1                                        | -2.1597912 | down |
| CELF5        | NM_021938                         | CUGBP, Elav-like family member 5                                      | -2.1591501 | down |
| WFDC8        | NM_130896                         | WAP four-disulfide core domain 8                                      | -2.1588523 | down |
| APLN         | NM_017413                         | apelin                                                                | -2.157271  | down |
| PTPN5        | NM_006906                         | protein tyrosine phosphatase, non-receptor type 5 (striatum-enriched) | -2.1556683 | down |
| TMEM117      | NM_032256                         | transmembrane protein 117                                             | -2.155298  | down |
| CNTNAP3B     | AB051501///NM_001201380//AK024257 | contactin associated protein-like 3B                                  | -2.1543336 | down |
| TTY13        | NR_001537                         | testis-specific transcript, Y-linked 13 (non-protein coding)          | -2.1502554 | down |
| LINC00442    | NR_026852                         | long intergenic non-protein coding RNA 442                            | -2.148959  | down |
| IQCF5        | NM_001145059                      | IQ motif containing F5                                                | -2.148922  | down |
| LOC100128081 | NR_034097                         | uncharacterized LOC100128081                                          | -2.1484575 | down |
| LOH12CR2     | NR_024061                         | loss of heterozygosity, 12, chromosomal region 2                      | -2.148283  | down |
| GIPC3        | NM_133261                         | GIPC PDZ domain containing family, member 3                           | -2.1461275 | down |
| MYO10        | NM_012334                         | myosin X                                                              | -2.139821  | down |

|              |                      |                                                                            |            |      |
|--------------|----------------------|----------------------------------------------------------------------------|------------|------|
|              | CU688199             |                                                                            | -2.1370525 | down |
| PLBD2        | NM_173542            | phospholipase B domain containing 2                                        | -2.1359034 | down |
| CPNE7        | NM_014427            | copine VII                                                                 | -2.1342006 | down |
| CHCHD7       | NM_001011667         | coiled-coil-helix-coiled-coil-helix domain containing 7                    | -2.1291068 | down |
| ZBTB7C       | NM_001039360         | zinc finger and BTB domain containing 7C                                   | -2.1289392 | down |
| CIB3         | NM_054113            | calcium and integrin binding family member 3                               | -2.1284103 | down |
| C14orf166B   | NM_194287            | chromosome 14 open reading frame 166B                                      | -2.1284084 | down |
| PKDCC        | NM_138370            | protein kinase domain containing, cytoplasmic homolog (mouse)              | -2.1258557 | down |
|              | AK302432             |                                                                            | -2.1226811 | down |
| MUC12        | NM_001164462         | mucin 12, cell surface associated                                          | -2.1223652 | down |
| BHLHA9       | NM_001164405         | basic helix-loop-helix family, member a9                                   | -2.1212633 | down |
|              | BC012174             |                                                                            | -2.120395  | down |
|              | AK026812             |                                                                            | -2.1196752 | down |
|              | CB270075             |                                                                            | -2.1195061 | down |
| TSPAN1       | NM_005727            | tetraspanin 1                                                              | -2.1143034 | down |
| NID2         | BX648241             | nidogen 2 (osteonidogen)                                                   | -2.1134534 | down |
| UBQLN3       | NM_017481            | ubiquilin 3                                                                | -2.1133804 | down |
| STMN4        | NM_030795            | stathmin-like 4                                                            | -2.112959  | down |
| RMST         | NR_024037            | rhabdomyosarcoma 2 associated transcript (non-protein coding)              | -2.112226  | down |
| NLRP9        | NM_176820            | NLR family, pyrin domain containing 9                                      | -2.1105695 | down |
| HEPN1        | NM_001037558         | hepatocellular carcinoma, down-regulated 1                                 | -2.1105409 | down |
| CCDC9        | NM_015603            | coiled-coil domain containing 9                                            | -2.1099033 | down |
| LOC90784     | NR_026984            | uncharacterized LOC90784                                                   | -2.1059442 | down |
| C16orf87     | NM_001001436         | chromosome 16 open reading frame 87                                        | -2.1015024 | down |
| ZIM2         | NM_015363            | zinc finger, imprinted 2                                                   | -2.1006057 | down |
| LOC440131    | NR_033889            | uncharacterized LOC440131                                                  | -2.099816  | down |
| PRSS2        | NM_002770            | protease, serine, 2 (trypsin 2)                                            | -2.0979638 | down |
| NAT8L        | NM_178557            | N-acetyltransferase 8-like (GCN5-related, putative)                        | -2.0978842 | down |
| C14orf176    | NM_001146683         | chromosome 14 open reading frame 176                                       | -2.0973334 | down |
| CASP14       | NM_012114            | caspase 14, apoptosis-related cysteine peptidase                           | -2.0969706 | down |
| PTK2B        | NM_173174///AK128371 | PTK2B protein tyrosine kinase 2 beta                                       | -2.0965767 | down |
| EPHA10       | NM_173641            | EPH receptor A10                                                           | -2.096572  | down |
| C8orf44-SGK3 | NM_001204173         | C8orf44-SGK3 readthrough                                                   | -2.0951014 | down |
| MIR143HG     | NR_027180            | MIR143 host gene (non-protein coding)                                      | -2.0921316 | down |
| LOC649201    | XM_001127211         | paraneoplastic antigen like 6A-like                                        | -2.0900328 | down |
|              | AK093443             |                                                                            | -2.0878046 | down |
| SLC2A6       | NM_017585            | solute carrier family 2 (facilitated glucose transporter), member 6        | -2.0866916 | down |
| POM121L1P    | NR_024591            | POM121 membrane glycoprotein-like 1, pseudogene                            | -2.085631  | down |
| ARNT2        | NM_014862            | aryl-hydrocarbon receptor nuclear translocator 2                           | -2.0834508 | down |
| LBX2         | NM_001009812         | ladybird homeobox 2                                                        | -2.0829527 | down |
| BCL11A       | NM_022893            | B-cell CLL/lymphoma 11A (zinc finger protein)                              | -2.0825357 | down |
| SLC6A3       | NM_001044            | solute carrier family 6 (neurotransmitter transporter, dopamine), member 3 | -2.0824823 | down |
| CHODL        | NM_024944            | chondrolectin                                                              | -2.0823462 | down |

|                |                          |                                                                               |            |      |
|----------------|--------------------------|-------------------------------------------------------------------------------|------------|------|
| PRKAR1B        | NM_001164761///NM_002735 | protein kinase, cAMP-dependent, regulatory, type I, beta                      | -2.0816574 | down |
| TAS2R31        | NM_176885                | taste receptor, type 2, member 31                                             | -2.081264  | down |
| LOC283888      | NR_037158                | uncharacterized LOC283888                                                     | -2.080609  | down |
| TTC36          | NM_001080441             | tetratricopeptide repeat domain 36                                            | -2.0795953 | down |
| FMN1           | NM_001103184             | formin 1                                                                      | -2.0783157 | down |
| HBD            | NM_000519                | hemoglobin, delta                                                             | -2.0768418 | down |
| FOXI3          | NM_001135649             | forkhead box I3                                                               | -2.0767267 | down |
| SART1          | NM_005146                | squamous cell carcinoma antigen recognized by T cells                         | -2.0765228 | down |
| REEP6          | NM_138393                | receptor accessory protein 6                                                  | -2.0735948 | down |
|                | XR_108282                |                                                                               | -2.0734959 | down |
| EXPH5          | NM_015065                | exophilin 5                                                                   | -2.0723968 | down |
| CHRNB3         | NM_000749                | cholinergic receptor, nicotinic, beta 3                                       | -2.0709572 | down |
| TFAP2A         | M61156                   | transcription factor AP-2 alpha (activating enhancer binding protein 2 alpha) | -2.0709248 | down |
| CACNG4         | NM_014405                | calcium channel, voltage-dependent, gamma subunit 4                           | -2.0699942 | down |
| CST2           | NM_001322                | cystatin SA                                                                   | -2.0673876 | down |
| SPN            | NM_001030288             | sialophorin                                                                   | -2.0671988 | down |
| OMP            | NM_006189                | olfactory marker protein                                                      | -2.067044  | down |
| ACCN1          | NM_183377                | amiloride-sensitive cation channel 1, neuronal                                | -2.0668747 | down |
| ANKAR          | NM_144708                | ankyrin and armadillo repeat containing                                       | -2.0664806 | down |
| ESR1           | NM_000125                | estrogen receptor 1                                                           | -2.0664165 | down |
| RABEPK         | NM_005833///AL832249     | Rab9 effector protein with kelch motifs                                       | -2.065677  | down |
| HIST1H4L       | NM_003546                | histone cluster 1, H4I                                                        | -2.0656586 | down |
|                | XR_110039                |                                                                               | -2.06471   | down |
|                | AK075182                 |                                                                               | -2.062517  | down |
| LOC440337      | XR_111632                | uncharacterized LOC440337                                                     | -2.0620723 | down |
| FBXW12         | NM_207102                | F-box and WD repeat domain containing 12                                      | -2.0591745 | down |
| TTC39B         |                          | tetratricopeptide repeat domain 39B                                           | -2.058892  | down |
| FMR1-AS1       | NR_024499                | FMR1 antisense RNA 1 (non-protein coding)                                     | -2.0567596 | down |
|                | AY203951                 |                                                                               | -2.055339  | down |
| FAM99A         | AK124823                 | family with sequence similarity 99, member A (non-protein coding)             | -2.0544324 | down |
| IKBKB          | XR_109728///NM_001556    | inhibitor of kappa light polypeptide gene enhancer in B-cells, kinase beta    | -2.0532818 | down |
| DNAJB13        | NM_153614                | DnaJ (Hsp40) homolog, subfamily B, member 13                                  | -2.0516517 | down |
| C3orf32        | NM_015931                | chromosome 3 open reading frame 32                                            | -2.050691  | down |
| DPRXP4         | NR_002221                | divergent-paired related homeobox pseudogene 4                                | -2.0499709 | down |
| DKFZp686A05212 | BX640722                 | uncharacterized LOC400505                                                     | -2.049751  | down |
|                | AK092418                 |                                                                               | -2.049159  | down |
| GNAZ           | NM_002073                | guanine nucleotide binding protein (G protein), alpha z polypeptide           | -2.048858  | down |
| ATP2B3         | NM_001001344             | ATPase, Ca++ transporting, plasma membrane 3                                  | -2.048586  | down |
| NTRK2          | NM_006180                | neurotrophic tyrosine kinase, receptor, type 2                                | -2.0484884 | down |
|                | AB231740                 |                                                                               | -2.046863  | down |
| MAGEA8         | NM_005364                | melanoma antigen family A, 8                                                  | -2.0468335 | down |
| FAM120C        | NM_017848                | family with sequence similarity 120C                                          | -2.0458806 | down |



|             |                      |                                                                            |            |      |
|-------------|----------------------|----------------------------------------------------------------------------|------------|------|
| FXVD3       | NM_001136007         | FXVD domain containing ion transport regulator 3                           | -2.0450728 | down |
| LCE2A       | NM_178428            | late cornified envelope 2A                                                 | -2.0443916 | down |
| ITGA11      | NM_001004439         | integrin, alpha 11                                                         | -2.042925  | down |
| TMEM235     | NM_001204210         | transmembrane protein 235                                                  | -2.04137   | down |
| CX3CL1      | NM_002996            | chemokine (C-X3-C motif) ligand 1                                          | -2.040802  | down |
| SH3D21      | NM_001162530         | SH3 domain containing 21                                                   | -2.0403612 | down |
| VPS18       | NM_020857            | vacuolar protein sorting 18 homolog (S. cerevisiae)                        | -2.0402434 | down |
|             | XR_110925            |                                                                            | -2.0384786 | down |
| TMEM201     | NM_001010866         | transmembrane protein 201                                                  | -2.0381317 | down |
| PABPN1L     | NM_001080487         | poly(A) binding protein, nuclear 1-like (cytoplasmic)                      | -2.0379143 | down |
|             | BX281397             |                                                                            | -2.03724   | down |
| HAP1        | NM_177977            | huntingtin-associated protein 1                                            | -2.0368109 | down |
|             |                      | catenin (cadherin-associated protein), delta                               |            |      |
| CTNND2      | NM_001332            | 2 (neural plakophilin-related arm-repeat protein)                          | -2.0353923 | down |
| MARCH10     | NM_152598            | membrane-associated ring finger (C3HC4) 10                                 | -2.0348182 | down |
| EML6        | AK131467             | echinoderm microtubule associated protein like 6                           | -2.0318718 | down |
| ZNF37A      | NM_001007094         | zinc finger protein 37A                                                    | -2.0318232 | down |
| SDS         | NM_006843            | serine dehydratase                                                         | -2.0291767 | down |
| TMEM37      | NM_183240            | transmembrane protein 37                                                   | -2.0291743 | down |
| PTCH2       | NM_003738            | patched 2                                                                  | -2.0286763 | down |
| GAN         | NM_022041            | gigaxonin                                                                  | -2.02859   | down |
| TBX10       | NM_005995            | T-box 10                                                                   | -2.0285823 | down |
| ECHDC2      | NM_018281            | enoyl CoA hydratase domain containing 2                                    | -2.0255418 | down |
| OR7A17      | NM_030901            | olfactory receptor, family 7, subfamily A, member 17                       | -2.0245028 | down |
| SLC10A7     | NM_001029998         | solute carrier family 10 (sodium/bile acid cotransporter family), member 7 | -2.0240805 | down |
|             | AF416714             |                                                                            | -2.0195365 | down |
|             | CR736467             |                                                                            | -2.018983  | down |
|             | X58736               |                                                                            | -2.0183103 | down |
| JPH2        | NM_175913            | junctophilin 2                                                             | -2.0178995 | down |
| ANKRD43     | NM_175873            | ankyrin repeat domain 43                                                   | -2.0168846 | down |
| PPP1R13L    | NM_006663            | protein phosphatase 1, regulatory subunit 13 like                          | -2.0133767 | down |
| TLX2        | NM_016170            | T-cell leukemia homeobox 2                                                 | -2.0096662 | down |
| EXOG        | NM_005107            | endo/exonuclease (5'-3'), endonuclease G-like                              | -2.0095582 | down |
| ARL9        | NM_206919            | ADP-ribosylation factor-like 9                                             | -2.0084627 | down |
| ITIH1       | NM_002215            | inter-alpha-trypsin inhibitor heavy chain 1                                | -2.0084305 | down |
| OR4C15      | NM_001001920         | olfactory receptor, family 4, subfamily C, member 15                       | -2.0051599 | down |
| ALPK1       | NM_025144///AK026323 | alpha-kinase 1                                                             | -2.0032086 | down |
| IL1RL2      | NM_003854            | interleukin 1 receptor-like 2                                              | -2.0026412 | down |
| OK/SW-CL.58 | AB064667             | OK/SW-CL.58                                                                | -2.0018082 | down |
| PRPH        | NM_006262            | peripherin                                                                 | -2.0013936 | down |
| C8orf85     | NM_001025357         | chromosome 8 open reading frame 85                                         | -2.0013928 | down |
| CCDC50      | NM_178335            | coiled-coil domain containing 50                                           | -2.0002527 | down |
