# Supplementary material for: Transcriptional signature associated with early rheumatoid arthritis and healthy individuals at high risk to develop the disease
Source: PubMed Central journal article supplement (PMC5870959; doi:10.1371/journal.pone.0194205), 2018-03-27
Supplement: pone.0194205.s006.pdf [file pone.0194205.s006.pdf]

**Supplementary table 6.** Up regulated genes in AR and ACCP+ groups according Venn diagram

| Gene Symbol | Genbank Accession | Gene Name                                                  | ACCP+       |            | RA          |            |
|-------------|-------------------|------------------------------------------------------------|-------------|------------|-------------|------------|
|             |                   |                                                            | Fold Change | Regulation | Fold Change | Regulation |
| LOC729305   |                   | uncharacterized LOC729305                                  | 4.0573115   | up         | 2.516636    | up         |
| ARHGAP40    |                   | Rho GTPase activating protein 40                           | 2.3690147   | up         | 2.0468392   | up         |
| F13A1       | NM_000129         | coagulation factor XIII, A1 polypeptide                    | 2.5725837   | up         | 2.1604183   | up         |
| AFAP1       | NM_001134647      | actin filament associated protein 1                        | 2.3948164   | up         | 2.338585    | up         |
| JKAMP       | NM_001284201      | JNK1/MAPK8-associated membrane protein                     | 2.2222292   | up         | 3.0562344   | up         |
| S100P       | NM_005980         | S100 calcium binding protein P                             | 3.8260586   | up         | 4.51571     | up         |
| SSTR5-AS1   | NR_027242         | SSTR5 antisense RNA 1                                      | 2.1461265   | up         | 2.5623827   | up         |
| ROBO3       | NM_022370         | roundabout, axon guidance receptor, homolog 3 (Drosophila) | 2.1030178   | up         | 2.0279005   | up         |
| PPP4R1L     | NR_003505         | protein phosphatase 4, regulatory subunit 1-like           | 2.8710845   | up         | 2.1227238   | up         |
| LINC00239   | NR_026774         | long intergenic non-protein coding RNA 239                 | 2.0563939   | up         | 2.4558783   | up         |
|             | JF834318          |                                                            | 2.1773176   | up         | 2.0780642   | up         |
| TEFM        | NM_024683         | transcription elongation factor, mitochondrial             | 2.1226554   | up         | 2.3261764   | up         |
| ACER1       | NM_133492         | alkaline ceramidase 1                                      | 2.399555    | up         | 2.0135407   | up         |
| STK17B      | BC052561          | serine/threonine kinase 17b                                | 2.6423168   | up         | 2.6169624   | up         |
| LINC01123   | NR_046110         | long intergenic non-protein coding RNA 1123                | 3.4334328   | up         | 2.0207531   | up         |
| Unkown      |                   |                                                            | 2.7547994   | up         | 2.466904    | up         |
| TGM2        | NM_198951         | transglutaminase 2                                         | 2.2009268   | up         | 2.7073684   | up         |
