# Supplementary material for: Transcriptional signature associated with early rheumatoid arthritis and healthy individuals at high risk to develop the disease
Source: PubMed Central journal article supplement (PMC5870959; doi:10.1371/journal.pone.0194205), 2018-03-27
Supplement: pone.0194205.s007.pdf [file pone.0194205.s007.pdf]

**Supplementary table 7.** Down regulated genes in AR and ACCP+ groups according Venn diagram

| Gene Symbol  | Genbank Accession | Gene Name                                                                           | ACCP+       |            | RA          |            |
|--------------|-------------------|-------------------------------------------------------------------------------------|-------------|------------|-------------|------------|
|              |                   |                                                                                     | Fold Change | Regulation | Fold Change | Regulation |
| FGF6         | NM_020996         | fibroblast growth factor 6                                                          | -2.7356706  | down       | -2.4612348  | down       |
| DCDC1        | NM_181807         | doublecortin domain containing 1                                                    | -10.398871  | down       | -5.908167   | down       |
| RSPH1        | NM_080860         | radial spoke head 1 homolog (Chlamydomonas)                                         | -3.0131872  | down       | -2.359272   | down       |
| IZUMO2       | NM_152358         | IZUMO family member 2                                                               | -2.4402485  | down       | -2.1440845  | down       |
| Unknown      |                   |                                                                                     | -5.4844894  | down       | -3.5735257  | down       |
| FAM205B      | AL080137          | transmembrane protein C9orf144B pseudogene                                          | -6.756355   | down       | -3.9766746  | down       |
| C1orf226     | NM_001085375      | chromosome 1 open reading frame 226                                                 | -4.013202   | down       | -2.8179643  | down       |
| LINC00870    |                   | long intergenic non-protein coding RNA 870                                          | -4.914358   | down       | -2.27644    | down       |
| RBMS3        | NM_014483         | RNA binding motif, single stranded interacting protein 3                            | -2.7508397  | down       | -2.1848514  | down       |
| SSMEM1       | NM_145268         | serine-rich single-pass membrane protein 1                                          | -5.0435715  | down       | -2.457924   | down       |
| LOC100128402 | AK124574          | uncharacterized LOC100128402                                                        | -3.041526   | down       | -3.337858   | down       |
| IPO7         | NM_006391         | importin 7                                                                          | -2.9247923  | down       | -2.0830383  | down       |
| ETV2         | NM_014209         | ets variant 2                                                                       | -2.3904889  | down       | -2.1907458  | down       |
| CCKAR        | NM_000730         | cholecystokinin A receptor                                                          | -3.2449987  | down       | -2.1643167  | down       |
| SDAD1        | AF132198          | SDA1 domain containing 1                                                            | -3.088813   | down       | -2.3475528  | down       |
| KDEL3        | NM_016657         | KDEL (Lys-Asp-Glu-Leu) endoplasmic reticulum protein retention receptor 3           | -2.8405354  | down       | -2.1010847  | down       |
|              | DR007925          |                                                                                     | -2.7181683  | down       | -3.0071445  | down       |
| C1S          | NM_201442         | complement component 1, s subcomponent                                              | -3.7875316  | down       | -2.2595763  | down       |
| CYP27B1      | NM_000785         | cytochrome P450, family 27, subfamily B, polypeptide 1                              | -2.458018   | down       | -2.2186098  | down       |
| RIIAD1       | NM_001144956      | regulatory subunit of type II PKA R-subunit (RIIa) domain containing 1              | -3.7718177  | down       | -2.486339   | down       |
| LARP6        | NM_197958         | La ribonucleoprotein domain family, member 6                                        | -2.0188422  | down       | -3.1811519  | down       |
| GRP          | NM_002091         | gastrin-releasing peptide                                                           | -2.6148796  | down       | -2.2236316  | down       |
| GPR135       | NM_022571         | G protein-coupled receptor 135                                                      | -3.2988245  | down       | -2.2938108  | down       |
| SPATA31D3    | NM_207416         | SPATA31 subfamily D, member 3                                                       | -3.8351433  | down       | -2.0161974  | down       |
| GHRHR        | NM_000823         | growth hormone releasing hormone receptor                                           | -3.2994812  | down       | -2.1087446  | down       |
| PGPEP1L      | NM_001167902      | pyroglutamyl-peptidase I-like                                                       | -2.9867265  | down       | -3.1144521  | down       |
| Unknown      |                   |                                                                                     | -4.23424    | down       | -2.114345   | down       |
|              | BX107671          |                                                                                     | -4.1807947  | down       | -2.2888033  | down       |
| DEFB103A     | NM_001081551      | defensin, beta 103A                                                                 | -3.5569656  | down       | -2.1911187  | down       |
| PLEKHD1      | NM_001161498      | pleckstrin homology domain containing, family D (with coiled-coil domains) member 1 | -2.2023618  | down       | -2.6186786  | down       |
| LCE2C        | NM_178429         | late cornified envelope 2C                                                          | -5.6939993  | down       | -2.5052247  | down       |
| TAS2R14      | NM_023922         | taste receptor, type 2, member 14                                                   | -4.24592    | down       | -2.5433955  | down       |
| MYO15B       | BC128044          | myosin XVb pseudogene                                                               | -3.9022787  | down       | -4.016065   | down       |
| ASAP3        | NM_017707         | ArfGAP with SH3 domain, ankyrin repeat and PH domain 3                              | -3.2008781  | down       | -2.8068252  | down       |
| LOC442028    | NR_037597         | uncharacterized LOC442028                                                           | -5.5398593  | down       | -2.8493435  | down       |
| XLOC_014512  |                   |                                                                                     | -6.898358   | down       | -2.9503536  | down       |
| Unknown      |                   |                                                                                     | -3.1783042  | down       | -4.625366   | down       |
| TBX6         | NM_004608         | T-box 6                                                                             | -5.7063303  | down       | -6.1043735  | down       |
| HS3ST4       | NM_006040         | heparan sulfate (glucosamine) 3-O-sulfotransferase 4                                | -2.5890305  | down       | -2.0810814  | down       |
| NGEF         | NM_019850         | neuronal guanine nucleotide exchange factor                                         | -6.0617447  | down       | -4.2346206  | down       |
| GTF2IRD1     | NM_005685         | GTF2I repeat domain containing 1                                                    | -4.403517   | down       | -3.1708293  | down       |
| SOST         | NM_025237         | sclerostin                                                                          | -4.5408583  | down       | -3.002744   | down       |
| EHMT1-IT1    | NR_024341         | EHMT1 intronic transcript 1                                                         | -2.2236643  | down       | -2.1003883  | down       |
| KCNC1        | NM_004976         | potassium voltage-gated channel, Shaw-related subfamily, member 1                   | -3.9483259  | down       | -2.2664573  | down       |
| Unknown      |                   |                                                                                     | -6.285416   | down       | -3.8360286  | down       |
|              | X13953            |                                                                                     | -3.6568775  | down       | -3.1475484  | down       |
| POU3F2       | NM_005604         | POU class 3 homeobox 2                                                              | -3.9604735  | down       | -2.2795503  | down       |
| KRT79        | NM_175834         | keratin 79                                                                          | -3.5263817  | down       | -2.656418   | down       |
| Unknown      |                   |                                                                                     | -4.829571   | down       | -3.9486558  | down       |
| LOC145694    | AK056793          | uncharacterized LOC145694                                                           | -2.6336966  | down       | -2.4219522  | down       |
| INHBA        | NM_002192         | inhibin, beta A                                                                     | -7.26326    | down       | -4.1262827  | down       |
| TERT         | NM_198253         | telomerase reverse transcriptase                                                    | -5.4082713  | down       | -3.9636452  | down       |
| CCL1         | NM_002981         | chemokine (C-C motif) ligand 1                                                      | -3.7698221  | down       | -2.4017992  | down       |
| RARRES2      | NM_002889         | retinoic acid receptor responder (tazarotene induced) 2                             | -7.238941   | down       | -4.8614817  | down       |
| MTPAP        | XR_171057         | mitochondrial poly(A) polymerase                                                    | -5.255531   | down       | -3.2774725  | down       |
| UGT2B11      | NM_001073         | UDP glucuronosyltransferase 2 family, polypeptide B11                               | -4.501039   | down       | -6.346666   | down       |
| RDM1         | NM_001034836      | RAD52 motif 1                                                                       | -3.3240294  | down       | -2.9162483  | down       |

|              |              |                                                                            |                 |                 |
|--------------|--------------|----------------------------------------------------------------------------|-----------------|-----------------|
| THBS2        | NM_003247    | thrombospondin 2                                                           | -3.0687163 down | -2.9432383 down |
| WTH3DI       | NM_001077637 | RAB6C-like                                                                 | -7.232513 down  | -3.3727872 down |
| MUC17        | NM_001040105 | mucin 17, cell surface associated                                          | -2.6185644 down | -2.5495353 down |
| Unknown      |              |                                                                            | -3.5285816 down | -3.2851312 down |
|              | XR_247077    |                                                                            | -4.0376334 down | -7.0911107 down |
| DPCR1        | NM_080870    | diffuse panbronchiolitis critical region 1                                 | -4.074805 down  | -5.749843 down  |
|              | XR_246934    |                                                                            | -4.9533257 down | -2.9334037 down |
| USP17L7      | NM_001256869 | ubiquitin specific peptidase 17-like family member 7                       | -2.4822962 down | -2.005743 down  |
| SLC35G5      | NM_054028    | solute carrier family 35, member G5                                        | -2.6206124 down | -3.3485498 down |
| LOC100996457 | XR_108874    | uncharacterized LOC100996457                                               | -2.7944608 down | -2.557444 down  |
|              | AK025047     |                                                                            | -3.5295773 down | -2.2335503 down |
| LOC285484    | NR_037863    | uncharacterized LOC285484                                                  | -4.1093225 down | -2.2150912 down |
| Unknown      |              |                                                                            | -3.814625 down  | -2.0048096 down |
| MYPN         | NM_032578    | myopalladin                                                                | -4.1722775 down | -2.060425 down  |
|              | BC031250     |                                                                            | -3.3856745 down | -4.2014008 down |
|              | DA144211     |                                                                            | -3.3923743 down | -2.0575192 down |
| CALCR        | NM_001164737 | calcitonin receptor                                                        | -4.8522997 down | -3.1915514 down |
| KANK1        | AL832454     | KN motif and ankyrin repeat domains 1                                      | -3.8645802 down | -2.398038 down  |
| PTCH2        | XM_005271301 | patched 2                                                                  | -5.1223755 down | -4.3255506 down |
| MAST4        | AK299538     | microtubule associated serine/threonine kinase family member 4             | -7.7951584 down | -7.23512 down   |
| RLN3         | NM_080864    | relaxin 3                                                                  | -4.7238793 down | -2.0871866 down |
| ULBP3        | NM_024518    | UL16 binding protein 3                                                     | -4.199691 down  | -2.414395 down  |
| KDM4A-AS1    | NR_033827    | KDM4A antisense RNA 1                                                      | -3.6983013 down | -3.0804498 down |
| GABRB1       | NM_000812    | gamma-aminobutyric acid (GABA) A receptor, beta 1                          | -3.4232345 down | -2.02682 down   |
| KRT33B       | NM_002279    | keratin 33B                                                                | -3.127337 down  | -3.0449245 down |
| Unknown      |              |                                                                            | -4.4404907 down | -3.190821 down  |
|              | BC136790     |                                                                            | -5.1337814 down | -4.031147 down  |
| FLJ25758     | NR_024372    | MAP/microtubule affinity-regulating kinase 1 pseudogene                    | -3.8291676 down | -2.172661 down  |
| CEACAM16     | NM_001039213 | carcinoembryonic antigen-related cell adhesion molecule 16                 | -4.22323 down   | -2.5336459 down |
| LOC100130930 | AK126579     | uncharacterized LOC100130930                                               | -2.2687356 down | -2.7929077 down |
| GOLGA8M      | NM_001282468 | golgin A8 family, member M                                                 | -3.0344326 down | -3.772159 down  |
| IQSEC3       | BC024764     | IQ motif and Sec7 domain 3                                                 | -5.352266 down  | -2.3883328 down |
|              | AK131313     |                                                                            | -4.142166 down  | -2.7875314 down |
| SCARA5       | AY337579     | scavenger receptor class A, member 5 (putative)                            | -3.6457164 down | -2.2809887 down |
| CATSPERD     | NM_152784    | catsper channel auxiliary subunit delta                                    | -4.006151 down  | -2.8033879 down |
| GRIK3        | NM_000831    | glutamate receptor, ionotropic, kainate 3                                  | -2.6034112 down | -2.8780453 down |
| EMR4P        | NR_024075    | egf-like module containing, mucin-like, hormone receptor-like 4 pseudogene | -5.591217 down  | -3.8318007 down |
| STON1        | AK128867     | stonin 1                                                                   | -2.3545156 down | -2.339463 down  |
| NAV2-AS5     | NR_049725    | NAV2 antisense RNA 5                                                       | -3.8621438 down | -3.5178869 down |
| DKK4         | NM_014420    | dickkopf WNT signaling pathway inhibitor 4                                 | -5.601517 down  | -2.437393 down  |
| CSMD2        | NM_052896    | CUB and Sushi multiple domains 2                                           | -3.7003953 down | -2.3411067 down |
|              | AK128128     |                                                                            | -4.6943436 down | -3.5356994 down |
| Unknown      |              |                                                                            | -4.7469234 down | -2.6931462 down |
| Unknown      |              |                                                                            | -2.5339923 down | -2.678121 down  |
|              | BC131768     |                                                                            | -4.7090745 down | -3.5131736 down |
| KCTD11       | NM_001002914 | potassium channel tetramerization domain containing 11                     | -2.3383977 down | -2.2699606 down |
|              | AF072164     |                                                                            | -5.8852663 down | -4.9391103 down |
| TCHHL1       | NM_001008536 | trichohyalin-like 1                                                        | -4.5610495 down | -2.0612605 down |
| LOC728503    | XM_001127575 | uncharacterized LOC728503                                                  | -2.6312406 down | -4.228413 down  |
| GATA4        | NM_002052    | GATA binding protein 4                                                     | -4.3179 down    | -2.033399 down  |
|              | AF289593     |                                                                            | -4.6415443 down | -3.0451298 down |
| LOC729159    | NM_001282301 | UPF0607 protein ENSP00000381418-like                                       | -3.9189873 down | -2.8732407 down |
| XLOC_014512  |              |                                                                            | -2.6954098 down | -2.1575031 down |
| OTOP1        | NM_177998    | otopetrin 1                                                                | -4.9926395 down | -2.1152172 down |
| OR2C1        | NM_012368    | olfactory receptor, family 2, subfamily C, member 1                        | -5.64337 down   | -2.673744 down  |
| Unknown      |              |                                                                            | -6.2617574 down | -4.1162167 down |
| CDX2         | NM_001265    | caudal type homeobox 2                                                     | -3.307679 down  | -2.2728572 down |
| DNM1P46      | NR_003260    | DNM1 pseudogene 46                                                         | -2.3741019 down | -2.2783635 down |
| HABP2        | NM_004132    | hyaluronan binding protein 2                                               | -7.531104 down  | -2.9742222 down |
| LOC100129393 | AK124631     | uncharacterized LOC100129393                                               | -5.76749 down   | -3.2786276 down |

|             |              |                                                                                                |                 |                 |
|-------------|--------------|------------------------------------------------------------------------------------------------|-----------------|-----------------|
| FAM106CP    | NR_026810    | family with sequence similarity 106, member C pseudogene                                       | -4.9130793 down | -2.1905699 down |
| DNPEP       | NM_012100    | aspartyl aminopeptidase                                                                        | -3.647235 down  | -2.3839345 down |
| Unknown     |              |                                                                                                | -2.6869447 down | -2.4030042 down |
| LOC283728   | AK095617     | uncharacterized LOC283728                                                                      | -6.717494 down  | -3.7149692 down |
| TRIM36      | BC017346     | tripartite motif containing 36                                                                 | -2.6318202 down | -5.316765 down  |
| LOC729305   |              | uncharacterized LOC729305                                                                      | -7.486693 down  | -5.7991824 down |
| MEDAG       | NM_032849    | mesenteric estrogen-dependent adipogenesis                                                     | -2.7451317 down | -2.6747673 down |
| NPIPB5      | NM_001135865 | nuclear pore complex interacting protein family, member B5                                     | -3.6593182 down | -2.2041225 down |
| Unknown     |              |                                                                                                | -5.1192384 down | -2.0018158 down |
| FREM2       | NM_207361    | FRAS1 related extracellular matrix protein 2                                                   | -3.0345447 down | -2.993317 down  |
|             | AK124041     |                                                                                                | -3.7615404 down | -2.1995711 down |
| LOC389332   | NR_024418    | uncharacterized LOC389332                                                                      | -4.722308 down  | -2.1874394 down |
| GINS2       | NM_016095    | GINS complex subunit 2 (Psf2 homolog)                                                          | -5.0490203 down | -8.626691 down  |
| Unknown     |              |                                                                                                | -2.1159 down    | -2.7930276 down |
| SERPINB3    | NM_006919    | serpin peptidase inhibitor, clade B (ovalbumin), member 3                                      | -4.2726974 down | -2.4826992 down |
| GABRQ       | NM_018558    | gamma-aminobutyric acid (GABA) A receptor, theta                                               | -4.7511625 down | -2.6876967 down |
| RASSF4      |              | Ras association (RalGDS/AF-6) domain family member 4                                           | -2.621052 down  | -2.224959 down  |
| DOC2B       | NM_003585    | double C2-like domains, beta                                                                   | -3.6279755 down | -2.4832351 down |
| Unknown     |              |                                                                                                | -2.4468224 down | -2.0665631 down |
| HRALS2      | NM_017878    | HRAS-like suppressor 2                                                                         | -3.0453184 down | -2.728009 down  |
| AKAP4       | NM_003886    | A kinase (PRKA) anchor protein 4                                                               | -4.6666627 down | -2.4355173 down |
| PRR7        | AK125417     | proline rich 7 (synaptic)                                                                      | -7.072389 down  | -4.424351 down  |
| Unknown     |              |                                                                                                | -6.7537675 down | -5.382475 down  |
| LOC642852   |              | uncharacterized LOC642852                                                                      | -5.164522 down  | -3.6159494 down |
| PCDHB11     | NM_018931    | protocadherin beta 11                                                                          | -3.6656606 down | -2.79214 down   |
| C5orf64     | NM_173667    | chromosome 5 open reading frame 64                                                             | -4.4786873 down | -4.768939 down  |
| NUDT8       | NM_001243750 | nudix (nucleoside diphosphate linked moiety X)-type motif 8                                    | -2.9733312 down | -3.5824828 down |
| Unknown     |              |                                                                                                | -3.9522982 down | -7.947017 down  |
| AOC4P       | NR_002773    | amine oxidase, copper containing 4, pseudogene                                                 | -4.6877036 down | -4.0430007 down |
| RNU4ATAC    | DW419002     | RNA, U4atac small nuclear (U12-dependent splicing)                                             | -2.18159 down   | -2.3195674 down |
| SLC25A51    | NR_024872    | solute carrier family 25, member 51                                                            | -4.5600233 down | -2.30282 down   |
| Unknown     |              |                                                                                                | -3.9081805 down | -2.5478723 down |
| XLOC_014512 |              |                                                                                                | -5.7082195 down | -2.5708065 down |
|             | Z18843       |                                                                                                | -3.573436 down  | -2.689854 down  |
| LOC729966   | NR_036575    | uncharacterized LOC729966                                                                      | -4.5013766 down | -2.4443069 down |
|             | BC020894     |                                                                                                | -3.053141 down  | -2.4803283 down |
| NR2E3       | NM_014249    | nuclear receptor subfamily 2, group E, member 3                                                | -3.1002529 down | -2.0687454 down |
|             | AK125981     |                                                                                                | -2.166294 down  | -2.5252504 down |
| ATP8B3      | NM_138813    | ATPase, aminophospholipid transporter, class I, type 8B, member 3                              | -4.734704 down  | -2.2276285 down |
|             | XR_247172    |                                                                                                | -2.9470575 down | -3.4689136 down |
| ZNF562      | NM_017656    | zinc finger protein 562                                                                        | -2.8975852 down | -2.0377355 down |
| GGA1        |              | golgi-associated, gamma adaptin ear containing, ARF binding protein 1                          | -3.1121163 down | -2.6645577 down |
| CYP3A4      | NM_017460    | cytochrome P450, family 3, subfamily A, polypeptide 4                                          | -2.2372468 down | -2.4023285 down |
| LAMB1       | BC044633     | laminin, beta 1                                                                                | -4.313568 down  | -2.4714444 down |
| COPE        | AK023303     | coatomer protein complex, subunit epsilon                                                      | -3.761863 down  | -2.519379 down  |
| MLLT4       | NM_001207008 | myeloid/lymphoid or mixed-lineage leukemia (trithorax homolog, Drosophila); translocated to, 4 | -4.9150195 down | -3.0376167 down |
| LINC00330   |              | long intergenic non-protein coding RNA 330                                                     | -4.0354204 down | -2.9228003 down |
| SERTM1      | NM_203451    | serine-rich and transmembrane domain containing 1                                              | -5.026436 down  | -3.9387424 down |
| IGFL3       | NM_207393    | IGF-like family member 3                                                                       | -5.951504 down  | -4.200748 down  |
| C19orf55    | NM_001039887 | chromosome 19 open reading frame 55                                                            | -2.8610198 down | -2.3949616 down |
| XLOC_001500 |              |                                                                                                | -2.8034983 down | -2.3815846 down |
| BMP15       | NM_005448    | bone morphogenetic protein 15                                                                  | -4.061518 down  | -2.9643145 down |
|             | AK024188     |                                                                                                | -3.879919 down  | -2.5607195 down |
| SFRP1       | NM_003012    | secreted frizzled-related protein 1                                                            | -5.789137 down  | -3.3551188 down |
| PCDHGB7     | NM_032101    | protocadherin gamma subfamily B, 7                                                             | -4.946394 down  | -3.278794 down  |
| SH2D4A      | NM_022071    | SH2 domain containing 4A                                                                       | -4.0896015 down | -2.4754755 down |
| PGM5-AS1    | NR_015423    | PGM5 antisense RNA 1                                                                           | -5.4077306 down | -2.2824948 down |
| LZTS2       | AK097997     | leucine zipper, putative tumor suppressor 2                                                    | -3.541616 down  | -2.420541 down  |

|              |              |                                                       |                 |                 |
|--------------|--------------|-------------------------------------------------------|-----------------|-----------------|
| Unknown      |              |                                                       | -3.657871 down  | -3.2616613 down |
| Unknown      |              |                                                       | -3.0938025 down | -2.5670633 down |
| LOC100129316 |              | uncharacterized LOC100129316                          | -4.417311 down  | -2.3271677 down |
| Unknown      |              |                                                       | -4.039256 down  | -2.8542833 down |
| LINC01120    |              | long intergenic non-protein coding RNA 1120           | -3.914519 down  | -2.151608 down  |
| PPP1R26      | NM_014811    | protein phosphatase 1, regulatory subunit 26          | -4.199215 down  | -2.507344 down  |
| MICU1        | XM_005269387 | mitochondrial calcium uptake 1                        | -3.7358396 down | -2.1282022 down |
|              | DA734158     |                                                       | -5.4436846 down | -3.0927353 down |
| NRSN2        | NM_024958    | neurensin 2                                           | -2.7972322 down | -2.9623015 down |
| PMFBP1       | NM_031293    | polyamine modulated factor 1 binding protein 1        | -3.627016 down  | -2.312073 down  |
| Unknown      |              |                                                       | -3.438147 down  | -2.4092784 down |
| RBBP8NL      | NM_080833    | RBBP8 N-terminal like                                 | -2.546231 down  | -2.3318949 down |
| KIFC2        | NM_145754    | kinesin family member C2                              | -2.2041512 down | -3.0426295 down |
| NANOS2       | NM_001029861 | nanos homolog 2 (Drosophila)                          | -3.345633 down  | -2.1999478 down |
| LAMC3        | NM_006059    | laminin, gamma 3                                      | -5.9667172 down | -4.0606203 down |
| LOC145837    | NR_026979    | uncharacterized LOC145837                             | -5.6042867 down | -3.6114953 down |
| BARX2        | NM_003658    | BARX homeobox 2                                       | -3.737969 down  | -2.2483613 down |
| Unknown      |              |                                                       | -2.2038448 down | -2.0048492 down |
| LOC254057    | AK024653     | uncharacterized LOC254057                             | -3.7843974 down | -2.1027448 down |
| Unknown      |              |                                                       | -2.1341243 down | -3.454256 down  |
| LOC100128333 | AK127681     | uncharacterized LOC100128333                          | -4.274669 down  | -2.4480226 down |
| MAGEB1       | NM_002363    | melanoma antigen family B, 1                          | -2.4571786 down | -2.6537116 down |
| RXFP2        | NM_130806    | relaxin/insulin-like family peptide receptor 2        | -2.9666843 down | -2.364773 down  |
| LOC100190940 | AK127723     | uncharacterized LOC100190940                          | -3.059862 down  | -2.2174277 down |
| XLOC_006339  |              |                                                       | -4.4362917 down | -4.6378016 down |
| NODAL        | NM_018055    | nodal growth differentiation factor                   | -4.4517674 down | -3.1945043 down |
| Unknown      |              |                                                       | -2.1858826 down | -2.900224 down  |
|              | XM_003118552 |                                                       | -7.4920907 down | -6.7279897 down |
| CYP7A1       | NM_000780    | cytochrome P450, family 7, subfamily A, polypeptide 1 | -5.9586134 down | -2.5759485 down |
| Unknown      |              |                                                       | -4.04905 down   | -2.8362055 down |
|              | AK098235     |                                                       | -2.4968948 down | -2.2333887 down |
| ZNF280A      | NM_080740    | zinc finger protein 280A                              | -5.2506285 down | -2.409288 down  |
| GSG1         | NM_001080554 | germ cell associated 1                                | -5.0986567 down | -5.013273 down  |
|              | AF090909     |                                                       | -4.7112746 down | -3.1378796 down |
| C15orf60     | NM_001042367 | chromosome 15 open reading frame 60                   | -3.8633578 down | -2.0673096 down |
|              | CR989582     |                                                       | -2.9639716 down | -2.0196733 down |
| LOC392364    | NR_040117    | nuclear pore associated protein 1 pseudogene          | -2.1191466 down | -2.0676107 down |
| IL36A        | NM_014440    | interleukin 36, alpha                                 | -2.9777825 down | -2.8281875 down |
| LOC389834    | NR_027420    | ankyrin repeat domain 57 pseudogene                   | -2.6569471 down | -2.187541 down  |
| AOX1         | NM_001159    | aldehyde oxidase 1                                    | -3.2718687 down | -2.6017566 down |
| Unknown      |              |                                                       | -3.7319307 down | -2.4459352 down |
| KMT2E        | NM_182931    | lysine (K)-specific methyltransferase 2E              | -2.1595058 down | -2.8510187 down |
| AVPR2        | NM_000054    | arginine vasopressin receptor 2                       | -4.2036986 down | -2.8083498 down |
| C11orf52     | NM_080659    | chromosome 11 open reading frame 52                   | -7.6105685 down | -3.7092638 down |
| LINC00467    | NR_026761    | long intergenic non-protein coding RNA 467            | -4.959096 down  | -3.2555642 down |
| Unknown      |              |                                                       | -3.117215 down  | -2.092665 down  |
|              | AK024162     |                                                       | -8.17975 down   | -5.4059706 down |
| SRRM3        | NM_001110199 | serine/arginine repetitive matrix 3                   | -2.890344 down  | -3.6287715 down |
| ELK4         | NM_021795    | ELK4, ETS-domain protein (SRF accessory protein 1)    | -2.567827 down  | -2.4673357 down |
| GGT8P        |              | gamma-glutamyltransferase 8 pseudogene                | -3.9339473 down | -4.8570437 down |
| GRIA3        | NM_000828    | glutamate receptor, ionotropic, AMPA 3                | -6.105583 down  | -3.609577 down  |
| CEBPA-AS1    | NR_026887    | CEBPA antisense RNA 1 (head to head)                  | -2.609788 down  | -2.1593254 down |
| S100A14      | NM_020672    | S100 calcium binding protein A14                      | -6.1257925 down | -4.210981 down  |
| RAPGEF3      | U78169       | Rap guanine nucleotide exchange factor (GEF) 3        | -2.9180486 down | -2.2429178 down |
| LRP2         | NM_004525    | low density lipoprotein receptor-related protein 2    | -8.930958 down  | -10.938198 down |
| OR52I2       | NM_001005170 | olfactory receptor, family 52, subfamily I, member 2  | -4.631544 down  | -2.2155972 down |
| Unknown      |              |                                                       | -2.473258 down  | -2.5089257 down |
| Unknown      |              |                                                       | -4.810202 down  | -4.0312285 down |
| COL27A1      | BC007696     | collagen, type XXVII, alpha 1                         | -3.8672407 down | -2.0218265 down |
| THEG5        | NM_001278577 | testis highly expressed protein 5                     | -3.1596646 down | -2.3005366 down |
| LRPPRC       | NM_133259    | leucine-rich pentatricopeptide repeat containing      | -2.0540526 down | -3.1235523 down |
| FOXQ1        | NM_033260    | forkhead box Q1                                       | -4.5112844 down | -3.5405126 down |

|              |              |                                                                                |                 |                 |
|--------------|--------------|--------------------------------------------------------------------------------|-----------------|-----------------|
| KCNA7        | NM_031886    | potassium voltage-gated channel, shaker-related subfamily, member 7            | -4.4486423 down | -2.1563544 down |
| SLC24A5      | NM_205850    | solute carrier family 24 (sodium/potassium/calcium exchanger), member 5        | -9.810018 down  | -5.512019 down  |
| LOC729159    | NM_001282301 | UPF0607 protein ENSP00000381418-like                                           | -5.6948113 down | -3.6623635 down |
|              | DR007930     |                                                                                | -4.064507 down  | -2.290563 down  |
|              |              |                                                                                | -6.077233 down  | -3.9309983 down |
| CACNA1B      |              | calcium channel, voltage-dependent, N type, alpha 1B subunit                   | -3.1216295 down | -2.0461526 down |
|              | BC040680     |                                                                                | -2.3249002 down | -2.9862437 down |
| GCNT4        | NM_016591    | glucosaminyl (N-acetyl) transferase 4, core 2                                  | -4.082605 down  | -2.5956194 down |
| Unknown      |              |                                                                                | -2.9892886 down | -2.8009536 down |
| MDH1B        | NM_001039845 | malate dehydrogenase 1B, NAD (soluble)                                         | -4.422717 down  | -2.4499521 down |
| LINC01107    |              | long intergenic non-protein coding RNA 1107                                    | -2.787989 down  | -2.4732323 down |
| KCP          | NM_199349    | kielin/chordin-like protein                                                    | -3.7424371 down | -2.190662 down  |
| HCN3         | NM_020897    | hyperpolarization activated cyclic nucleotide-gated potassium channel 3        | -2.589922 down  | -2.6795626 down |
|              | XR_241335    |                                                                                | -6.037035 down  | -3.5204198 down |
| Unknown      |              |                                                                                | -5.662252 down  | -3.6131644 down |
| ATP10D       | NM_020453    | ATPase, class V, type 10D                                                      | -2.8716946 down | -2.5520403 down |
| MAGEA2B      | NM_153488    | melanoma antigen family A, 2B                                                  | -7.9043283 down | -3.4460616 down |
| LINC00588    | NR_026772    | long intergenic non-protein coding RNA 588                                     | -3.5732524 down | -3.3366601 down |
| PTK6         | NM_005975    | protein tyrosine kinase 6                                                      | -2.8881297 down | -4.342905 down  |
| FAM71A       | NM_153606    | family with sequence similarity 71, member A                                   | -4.6503105 down | -2.6628368 down |
| RASSF6       | NM_177532    | Ras association (RalGDS/AF-6) domain family member 6                           | -4.3898015 down | -3.694323 down  |
| Unknown      |              |                                                                                | -3.3953197 down | -2.6536207 down |
| TPD52        |              | tumor protein D52                                                              | -2.5669 down    | -2.0229888 down |
| ARHGAP44     | NM_014859    | Rho GTPase activating protein 44                                               | -2.2771447 down | -2.3134844 down |
| Unknown      |              |                                                                                | -3.4707677 down | -2.7637691 down |
| LOC400743    |              | uncharacterized LOC400743                                                      | -4.7660003 down | -3.1892774 down |
| GAGE7        | NM_021123    | G antigen 7                                                                    | -8.785406 down  | -4.559126 down  |
| Unknown      |              |                                                                                | -2.0609853 down | -2.0418484 down |
| Unknown      |              |                                                                                | -2.4924583 down | -3.1730504 down |
| Unknown      |              |                                                                                | -3.928244 down  | -6.8913774 down |
| LAT2         | XM_005250562 | linker for activation of T cells family, member 2                              | -3.56985 down   | -3.0589664 down |
| Unknown      |              |                                                                                | -2.1434238 down | -3.1212816 down |
| LOC101929998 |              | uncharacterized LOC101929998                                                   | -2.7336268 down | -3.6147633 down |
| LOC647070    | AK001442     | uncharacterized LOC647070                                                      | -2.8765714 down | -2.4439862 down |
| AFF3         |              | AF4/FMR2 family, member 3                                                      | -6.0185285 down | -2.695566 down  |
| C1orf51      | NM_144697    | chromosome 1 open reading frame 51                                             | -3.3635309 down | -2.4202318 down |
| CSRP2        | NM_001321    | cysteine and glycine-rich protein 2                                            | -15.822509 down | -22.980167 down |
| MDM4         | NM_001278518 | Mdm4 p53 binding protein homolog (mouse)                                       | -3.3000515 down | -3.1185024 down |
|              | DC378344     |                                                                                | -2.4340184 down | -2.378194 down  |
| XLOC_014512  |              |                                                                                | -3.158004 down  | -4.3220015 down |
|              | XR_245224    |                                                                                | -4.198692 down  | -3.5886817 down |
| OR51G1       | NM_001005237 | olfactory receptor, family 51, subfamily G, member 1                           | -2.267934 down  | -2.8088446 down |
| GPR158-AS1   | NR_027333    | GPR158 antisense RNA 1                                                         | -5.1155467 down | -3.0326595 down |
| GOLGA6L5P    |              | golgin A6 family-like 5, pseudogene                                            | -5.956165 down  | -4.1409206 down |
| MAEL         | NM_032858    | maelstrom spermatogenic transposon silencer                                    | -2.0187945 down | -2.2612245 down |
| S100A1       | NM_006271    | S100 calcium binding protein A1                                                | -3.8897114 down | -2.3622494 down |
| Unknown      |              |                                                                                | -6.775108 down  | -2.6913917 down |
| SOBP         | NM_018013    | sine oculis binding protein homolog (Drosophila)                               | -2.8791604 down | -2.1060286 down |
| SH2D6        | XM_005264269 | SH2 domain containing 6                                                        | -2.6459694 down | -2.6259198 down |
| ST8SIA1      | NM_003034    | ST8 alpha-N-acetyl-neuraminidase alpha-2,8-sialyltransferase 1                 | -4.3716426 down | -4.096914 down  |
| RPL23AP64    | NR_003040    | ribosomal protein L23a pseudogene 64                                           | -3.2202754 down | -2.6580968 down |
| DEPDC5       | NM_001007188 | DEP domain containing 5                                                        | -3.2977488 down | -2.033664 down  |
| Unknown      |              |                                                                                | -4.1415133 down | -2.4126246 down |
| ANKRD13B     | NM_152345    | ankyrin repeat domain 13B                                                      | -9.177254 down  | -5.5920157 down |
| TEX13A       | NM_031274    | testis expressed 13A                                                           | -3.496359 down  | -2.1771133 down |
| WDR87        | NM_031951    | WD repeat domain 87                                                            | -6.4895234 down | -6.350717 down  |
| TPTE2P3      | NR_002793    | transmembrane phosphoinositide 3-phosphatase and tensin homolog 2 pseudogene 3 | -4.541015 down  | -2.8170989 down |
| Unknown      |              |                                                                                | -5.0733256 down | -3.350116 down  |

|              |              |                                                                                               |                 |                 |
|--------------|--------------|-----------------------------------------------------------------------------------------------|-----------------|-----------------|
| COL5A3       | NM_015719    | collagen, type V, alpha 3                                                                     | -2.447098 down  | -2.316712 down  |
| TULP1        | NM_003322    | tubby like protein 1                                                                          | -3.1633475 down | -2.0884333 down |
| TRPC2        |              | transient receptor potential cation channel, subfamily C, member 2, pseudoqene                | -3.6966984 down | -2.4366245 down |
| KRTAP4-2     | NM_033062    | keratin associated protein 4-2                                                                | -4.4064183 down | -2.0248802 down |
| FTCD         | NM_206965    | formimidoyltransferase cyclodeaminase                                                         | -4.3600597 down | -2.5420594 down |
| LINC00371    | NR_102432    | long intergenic non-protein coding RNA 371                                                    | -3.575458 down  | -2.6738272 down |
| GAS2L2       | NM_139285    | growth arrest-specific 2 like 2                                                               | -3.9202523 down | -2.6415405 down |
| Unknown      |              |                                                                                               | -2.3967628 down | -2.568622 down  |
| NEK10        | XM_005265644 | NIMA-related kinase 10                                                                        | -3.131731 down  | -2.1835463 down |
| Unknown      |              |                                                                                               | -5.649989 down  | -2.1255703 down |
| DUOXA1       | NM_001276266 | dual oxidase maturation factor 1                                                              | -2.4777508 down | -3.0396867 down |
| USP17L8      | NM_001256872 | ubiquitin specific peptidase 17-like family member 8                                          | -2.9799976 down | -2.5991228 down |
| LOC100131581 | AK092544     | uncharacterized LOC100131581                                                                  | -8.597723 down  | -8.233938 down  |
| RAX          | NM_013435    | retina and anterior neural fold homeobox                                                      | -4.5225215 down | -2.3905017 down |
| CSTL1        | NM_138283    | cystatin-like 1                                                                               | -4.9539375 down | -2.3075707 down |
| HECTD2       | NM_173497    | HECT domain containing E3 ubiquitin protein ligase 2                                          | -5.39886 down   | -2.4544797 down |
| VSTM2A       | NM_182546    | V-set and transmembrane domain containing 2A                                                  | -4.4006214 down | -2.1677985 down |
| ABCD3        | NM_001122674 | ATP-binding cassette, sub-family D (ALD), member 3                                            | -4.1378484 down | -2.609972 down  |
| GPR61        | NM_031936    | G protein-coupled receptor 61                                                                 | -4.045343 down  | -2.4386528 down |
| LAMA5        | BC015386     | laminin, alpha 5                                                                              | -3.6840506 down | -2.5294468 down |
| Unknown      |              |                                                                                               | -3.5418634 down | -2.0559359 down |
| DISC1        | NM_001164550 | disrupted in schizophrenia 1                                                                  | -3.5727456 down | -4.0900855 down |
| LOC100130542 | AK127083     | uncharacterized LOC100130542                                                                  | -3.4345715 down | -2.8147304 down |
| KIAA1755     | NM_001029864 | KIAA1755                                                                                      | -2.851643 down  | -2.2032206 down |
|              | AK095621     |                                                                                               | -3.589049 down  | -3.285275 down  |
| Unknown      |              |                                                                                               | -3.0009613 down | -2.8335786 down |
| Unknown      |              |                                                                                               | -4.9574223 down | -2.9292002 down |
|              | XM_005276704 |                                                                                               | -3.2809958 down | -6.4335713 down |
| LOC284551    | NR_027085    | uncharacterized LOC284551                                                                     | -4.7185216 down | -2.3071935 down |
| C6orf10      | NM_006781    | chromosome 6 open reading frame 10                                                            | -3.8626244 down | -2.1796014 down |
|              |              |                                                                                               | -8.049088 down  | -4.9856873 down |
| TUBB8        | NM_177987    | tubulin, beta 8 class VIII                                                                    | -4.7999144 down | -3.1990798 down |
| SLC9A3R2     | NM_004785    | solute carrier family 9, subfamily A (NHE3, cation proton antiporter 3), member 3 regulator 2 | -2.3047967 down | -2.225512 down  |
| MAP3K4       | NM_006724    | mitogen-activated protein kinase kinase kinase 4                                              | -3.8696704 down | -2.7849026 down |
| FLJ45743     |              | uncharacterized LOC642484                                                                     | -2.763872 down  | -2.9401739 down |
| TTYT13       |              | testis-specific transcript, Y-linked 13 (non-protein coding)                                  | -2.0200555 down | -2.388504 down  |
| OR51I2       | NM_001004754 | olfactory receptor, family 51, subfamily I, member 2                                          | -4.278258 down  | -2.84366 down   |
| CERCAM       | NM_016174    | cerebral endothelial cell adhesion molecule                                                   | -5.9602847 down | -7.717456 down  |
| LOC100128374 | XR_112969    | uncharacterized LOC100128374                                                                  | -3.172776 down  | -2.3091383 down |
| BRINP3       | NM_199051    | bone morphogenetic protein/retinoic acid inducible neural-specific 3                          | -3.4584541 down | -4.288718 down  |
| KLHL4        | NM_057162    | kelch-like family member 4                                                                    | -2.0216594 down | -2.8599212 down |
| LOC101930210 | XR_246852    | protein capicua homolog                                                                       | -6.283665 down  | -4.3714232 down |
| Unknown      |              |                                                                                               | -2.9050434 down | -2.9069355 down |
| C1orf52      | NM_198077    | chromosome 1 open reading frame 52                                                            | -3.0224564 down | -2.9682403 down |
| KCNQ2        | AK293727     | potassium voltage-gated channel, KQT-like subfamily, member 2                                 | -3.7738152 down | -2.6751084 down |
|              | AB305786     |                                                                                               | -3.074929 down  | -2.3179505 down |
| KIAA1161     | NM_020702    | KIAA1161                                                                                      | -2.604228 down  | -2.6965714 down |
| OR9G9        | NM_001013358 | olfactory receptor, family 9, subfamily G, member 9                                           | -3.4962032 down | -2.3524234 down |
| GDAP1L1      | NM_024034    | ganglioside induced differentiation associated protein 1-like 1                               | -3.154506 down  | -2.310358 down  |
| SCARNA5      | NR_003008    | small Cajal body-specific RNA 5                                                               | -5.604073 down  | -3.9698277 down |
| KRT6A        | NM_005554    | keratin 6A                                                                                    | -2.7788346 down | -2.9003875 down |
| Unknown      |              |                                                                                               | -3.849484 down  | -3.1290665 down |
| ZNF526       | NM_133444    | zinc finger protein 526                                                                       | -2.2385113 down | -2.008108 down  |
| TMEM201      | NM_001130924 | transmembrane protein 201                                                                     | -2.0417995 down | -2.8604376 down |
| XAGE-4       | XR_113307    | XAGE-4 protein                                                                                | -3.8336847 down | -2.8020458 down |
| Unknown      |              |                                                                                               | -2.930544 down  | -3.4956048 down |
| OR4F21       | NM_001005504 | olfactory receptor, family 4, subfamily F, member 21                                          | -4.8957086 down | -2.3006544 down |
| Unknown      |              |                                                                                               | -2.5361595 down | -2.1157777 down |
| Unknown      |              |                                                                                               | -2.683017 down  | -2.303116 down  |

|              |              |                                                                    |                 |                 |
|--------------|--------------|--------------------------------------------------------------------|-----------------|-----------------|
| CYP4F24P     |              | cytochrome P450, family 4, subfamily F, polypeptide 24, pseudogene | -2.3393188 down | -2.5150135 down |
| BARHL2       | NM_020063    | BarH-like homeobox 2                                               | -4.315287 down  | -2.1635277 down |
| UPB1         | NM_016327    | ureidopropionase, beta                                             | -2.7191365 down | -2.5708623 down |
| Unknown      |              |                                                                    | -5.385691 down  | -2.3648338 down |
| GSG1         | NM_031289    | germ cell associated 1                                             | -4.493778 down  | -2.3850048 down |
| Unknown      |              |                                                                    | -5.0339055 down | -3.1702468 down |
| CALY         |              | calcyon neuron-specific vesicular protein                          | -2.7939858 down | -2.565098 down  |
| SLC16A13     | NM_201566    | solute carrier family 16, member 13                                | -2.9460757 down | -2.192794 down  |
| THBS3        | CR933610     | thrombospondin 3                                                   | -2.1435308 down | -2.482915 down  |
| LOC389199    | XR_112616    | uncharacterized LOC389199                                          | -5.6941924 down | -5.2141843 down |
| ASIC3        | NM_020322    | acid-sensing (proton-gated) ion channel 3                          | -2.556778 down  | -2.2609878 down |
| LOC285768    |              | uncharacterized LOC285768                                          | -2.9096715 down | -2.4689662 down |
| GOLGA2       |              | golgin A2                                                          | -2.0631425 down | -2.2291788 down |
| LOC101060085 | XM_003960901 | uncharacterized LOC101060085                                       | -4.2096252 down | -2.6206617 down |
|              | AK123308     |                                                                    | -3.471036 down  | -2.0549405 down |
| SORCS3       | NM_014978    | sortilin-related VPS10 domain containing receptor 3                | -4.1438384 down | -2.2625854 down |
| LOC100130051 | AK127296     | uncharacterized LOC100130051                                       | -3.6706736 down | -2.4956615 down |
| OR2T5        | NM_001004697 | olfactory receptor, family 2, subfamily T, member 5                | -4.3583646 down | -2.1197217 down |
| Unknown      |              |                                                                    | -5.462452 down  | -2.175076 down  |
| LOC157273    |              | uncharacterized LOC157273                                          | -6.6521487 down | -2.7618835 down |
|              | AK126938     |                                                                    | -3.9056528 down | -2.921644 down  |
| NNMT         | NM_006169    | nicotinamide N-methyltransferase                                   | -9.808606 down  | -13.12961 down  |
| Unknown      |              |                                                                    | -4.1117153 down | -2.3312879 down |
| LINC00310    |              | long intergenic non-protein coding RNA 310                         | -4.5679903 down | -2.173869 down  |
| LPHN1        | NM_001008701 | latrophilin 1                                                      | -2.548114 down  | -2.3900933 down |
| TEX38        | NM_001145474 | testis expressed 38                                                | -5.2272854 down | -4.49347 down   |
| Unknown      |              |                                                                    | -3.2390456 down | -3.5526977 down |
| DEFB134      | NM_001033019 | defensin, beta 134                                                 | -4.272501 down  | -2.3584015 down |
| RETSAT       |              | retinol saturase (all-trans-retinol 13,14-reductase)               | -4.187894 down  | -2.0712445 down |
| C22orf34     | NR_026997    | chromosome 22 open reading frame 34                                | -2.2686067 down | -3.4166331 down |
| FAM163B      | NM_001080515 | family with sequence similarity 163, member B                      | -3.0009964 down | -4.526807 down  |
| Unknown      |              |                                                                    | -4.2920394 down | -2.2805216 down |
| DEFB107A     | NM_001037668 | defensin, beta 107A                                                | -5.8547006 down | -6.540771 down  |
| EMP2         | NM_001424    | epithelial membrane protein 2                                      | -4.497152 down  | -3.9792604 down |
| Unknown      |              |                                                                    | -3.6748657 down | -2.4281075 down |
| KLK13        | NM_015596    | kallikrein-related peptidase 13                                    | -3.5179138 down | -2.421634 down  |
| MOG          | NM_206809    | myelin oligodendrocyte glycoprotein                                | -3.3864996 down | -2.8477802 down |
| Unknown      |              |                                                                    | -3.1846945 down | -2.42982 down   |
| IQCF2        | NM_203424    | IQ motif containing F2                                             | -3.8578835 down | -3.2830222 down |
| PCDHGB1      | NM_032095    | protocadherin gamma subfamily B, 1                                 | -2.5671983 down | -2.044309 down  |
| LOC100131742 | AK130172     | uncharacterized LOC100131742                                       | -2.9540162 down | -2.585999 down  |
| Unknown      |              |                                                                    | -4.821494 down  | -3.7484388 down |
| POTEM        | NM_001145442 | POTE ankyrin domain family, member M                               | -5.870577 down  | -7.468435 down  |
| FOXA3        | NM_004497    | forkhead box A3                                                    | -2.276451 down  | -2.5469534 down |
| LINC00271    | NR_026805    | long intergenic non-protein coding RNA 271                         | -3.210521 down  | -2.036642 down  |
| Unknown      |              |                                                                    | -2.701382 down  | -3.0407228 down |
| Unknown      |              |                                                                    | -3.7331333 down | -2.9879882 down |
| MYBPC1       | NM_206819    | myosin binding protein C, slow type                                | -4.8794165 down | -2.3334785 down |
| FLJ45482     | AK127393     | uncharacterized LOC645566                                          | -2.1131496 down | -2.0237968 down |
| RAD21-AS1    | NR_033886    | RAD21 antisense RNA 1                                              | -4.5330076 down | -2.5131156 down |
| Unknown      |              |                                                                    | -5.920746 down  | -3.9413996 down |
| Unknown      |              |                                                                    | -7.209718 down  | -5.029593 down  |
| FAM213A      | NM_001243780 | family with sequence similarity 213, member A                      | -2.0932353 down | -2.2744062 down |
| CBX1         | NM_006807    | chromobox homolog 1                                                | -5.542864 down  | -2.1077194 down |
| NT5DC4       | XM_001716359 | 5'-nucleotidase domain containing 4                                | -3.0654423 down | -2.1735709 down |
| CCNT1        | NM_001240    | cyclin T1                                                          | -4.919279 down  | -2.7882442 down |
| KLK8         | NM_144505    | kallikrein-related peptidase 8                                     | -3.3221169 down | -3.1755412 down |
| XLOC_014512  |              |                                                                    | -3.3489199 down | -2.2669382 down |
| Unknown      |              |                                                                    | -2.9625103 down | -3.81752 down   |
| MAGIX        | XM_005278064 | MAGI family member, X-linked                                       | -4.040417 down  | -3.233026 down  |
| Unknown      |              |                                                                    | -5.8650217 down | -4.2233114 down |
| EDA          | NM_001005610 | ectodysplasin A                                                    | -3.2992418 down | -2.1785462 down |

|                    |              |                                                                  |                 |                 |
|--------------------|--------------|------------------------------------------------------------------|-----------------|-----------------|
| NAT8               | NM_003960    | N-acetyltransferase 8 (GCN5-related, putative)                   | -2.053412 down  | -2.8716145 down |
| PTGER4P2-CDK2AP2P2 | NR_024496    | PTGER4P2-CDK2AP2P2 readthrough transcribed pseudogene            | -3.012088 down  | -2.1895514 down |
| SERPINI2           | NM_006217    | serpin peptidase inhibitor, clade I (pancpin), member 2          | -2.15828 down   | -2.0928302 down |
| HYKK               | NM_001083612 | hydroxyllysine kinase                                            | -2.6601794 down | -3.9076874 down |
| ZBED3-AS1          | NR_024398    | ZBED3 antisense RNA 1                                            | -7.885624 down  | -3.2932596 down |
| OR13A1             | NM_001004297 | olfactory receptor, family 13, subfamily A, member 1             | -3.9673913 down | -2.099428 down  |
| ADAMTS15           | NM_139055    | ADAM metalloproteinase with thrombospondin type 1 motif, 15      | -4.1341434 down | -2.1439404 down |
| ZNF813             | NM_001004301 | zinc finger protein 813                                          | -4.167519 down  | -2.342992 down  |
| ADARB1             | NR_027673    | adenosine deaminase, RNA-specific, B1                            | -2.712197 down  | -2.1330729 down |
| LOC100233156       | AK126241     | tektin 4 pseudogene                                              | -6.2541156 down | -3.8529954 down |
|                    | BC040680     |                                                                  | -2.854412 down  | -2.1774023 down |
| LINC00689          |              | long intergenic non-protein coding RNA 689                       | -4.6481786 down | -2.2514052 down |
| PRKD1              | NM_002742    | protein kinase D1                                                | -4.0513344 down | -3.865807 down  |
| RAX2               | NM_032753    | retina and anterior neural fold homeobox 2                       | -4.2330184 down | -4.128754 down  |
| ZNF169             | NM_194320    | zinc finger protein 169                                          | -2.066752 down  | -2.108995 down  |
| A1CF               | NM_138933    | APOBEC1 complementation factor                                   | -3.839784 down  | -3.7475994 down |
| GIPC3              | NM_133261    | GIPC PDZ domain containing family, member 3                      | -5.3851786 down | -2.9935844 down |
| LOC642620          | AK057320     | uncharacterized LOC642620                                        | -3.2882762 down | -3.0802457 down |
| LINC00618          | NR_104113    | long intergenic non-protein coding RNA 618                       | -2.7428224 down | -2.9055536 down |
| SLCO5A1            | NM_030958    | solute carrier organic anion transporter family, member 5A1      | -4.9413896 down | -2.3006828 down |
| GPC1               | NM_002081    | glypican 1                                                       | -2.2144046 down | -2.2077737 down |
| HHIP1              | NM_032425    | HHIP-like 1                                                      | -3.4155917 down | -2.093702 down  |
| HECTD2             | NM_182765    | HECT domain containing E3 ubiquitin protein ligase 2             | -4.4645815 down | -4.0942264 down |
| Unknown            |              |                                                                  | -4.001242 down  | -2.8668354 down |
| CSHL1              | NM_022579    | chorionic somatomammotropin hormone-like 1                       | -2.5057847 down | -2.6213083 down |
| FAM106A            | NR_026809    | family with sequence similarity 106, member A                    | -4.532388 down  | -3.5205219 down |
| Unknown            |              |                                                                  | -2.0774088 down | -2.9638157 down |
|                    | AK127893     |                                                                  | -7.202477 down  | -4.8544517 down |
| VTCN1              | NR_045603    | V-set domain containing T cell activation inhibitor 1            | -3.9781182 down | -2.031538 down  |
| LOC100132529       | NR_103851    | uncharacterized LOC100132529                                     | -3.5951004 down | -2.9600005 down |
| LOC100127904       | BC065739     | uncharacterized LOC100127904                                     | -3.549728 down  | -5.4386525 down |
| LINC00544          |              | long intergenic non-protein coding RNA 544                       | -4.11095 down   | -2.5443115 down |
| Unknown            | XR_243769    |                                                                  | -2.3676298 down | -2.8649302 down |
| LOC728903          | AK093722     | uncharacterized LOC728903                                        | -2.816711 down  | -2.5341508 down |
| ZDHHC23            | AK127260     | zinc finger, DHHC-type containing 23                             | -6.642432 down  | -6.0998616 down |
| Unknown            | XM_005263792 |                                                                  | -3.3495297 down | -3.1391382 down |
| TNFRSF6B           | NM_003823    | tumor necrosis factor receptor superfamily, member 6b, decoy     | -2.6274188 down | -3.1570582 down |
| Unknown            |              |                                                                  | -2.2161825 down | -2.4181159 down |
| PRSS16             | NM_005865    | protease, serine, 16 (thymus)                                    | -9.22594 down   | -11.002375 down |
| ABCG4              | NM_022169    | ATP-binding cassette, sub-family G (WHITE), member 4             | -4.1571283 down | -2.0086153 down |
| PCED1B-AS1         | NR_026544    | PCED1B antisense RNA 1                                           | -3.536466 down  | -2.3936365 down |
| OR7E5P             | NR_027688    | olfactory receptor, family 7, subfamily E, member 5 pseudogene   | -3.319051 down  | -3.4216955 down |
| Unknown            |              |                                                                  | -4.762558 down  | -3.1926172 down |
| Unknown            |              |                                                                  | -3.5872154 down | -2.2247903 down |
| VSIG10L            | NM_001163922 | V-set and immunoglobulin domain containing 10 like               | -4.7419457 down | -2.73466 down   |
| FAM57B             | NM_031478    | family with sequence similarity 57, member B                     | -2.1994233 down | -2.1494594 down |
| PHYHIP             | NM_014759    | phytanoyl-CoA 2-hydroxylase interacting protein                  | -5.250907 down  | -3.9368682 down |
| FLJ42022           | AK124016     | uncharacterized LOC646748                                        | -3.167998 down  | -2.330798 down  |
| C1QTNF1-AS1        | NR_040018    | C1QTNF1 antisense RNA 1                                          | -3.9835076 down | -2.4516547 down |
| GOLGA6L4           | NM_001267536 | golgin A6 family-like 4                                          | -4.712639 down  | -2.619375 down  |
| NACAD              | NM_001146334 | NAC alpha domain containing                                      | -5.321976 down  | -2.9412565 down |
| POTED              | NM_174981    | POTE ankyrin domain family, member D                             | -6.789891 down  | -3.989508 down  |
| LOC646652          | XR_241774    | integral membrane glycoprotein-like                              | -2.1505013 down | -3.532068 down  |
| MTSS1L             | NM_138383    | metastasis suppressor 1-like                                     | -3.1351573 down | -3.9568074 down |
| VAC14-AS1          | NR_034083    | VAC14 antisense RNA 1                                            | -2.433133 down  | -2.3949747 down |
| LGALS14            | NM_203471    | lectin, galactoside-binding, soluble, 14                         | -4.251584 down  | -2.9478471 down |
| KRT34              | NM_021013    | keratin 34                                                       | -2.625701 down  | -3.3958266 down |
| TLE6               | NM_001143986 | transducin-like enhancer of split 6 (E(sp1) homolog, Drosophila) | -4.5395117 down | -3.1661563 down |
| Unknown            |              |                                                                  | -5.394148 down  | -4.0448604 down |



|              |              |                                                                                                     |                 |                 |
|--------------|--------------|-----------------------------------------------------------------------------------------------------|-----------------|-----------------|
| ENGASE       | NM_001042573 | endo-beta-N-acetylglucosaminidase                                                                   | -3.6411772 down | -3.5386775 down |
| Unknown      |              |                                                                                                     | -2.8715608 down | -2.2317536 down |
| HSPB3        | NM_006308    | heat shock 27kDa protein 3                                                                          | -4.4834275 down | -2.325979 down  |
| PGM5P2       |              | phosphoglucomutase 5 pseudogene 2                                                                   | -4.1240783 down | -2.2196925 down |
| RIPK4        | NM_020639    | receptor-interacting serine-threonine kinase 4                                                      | -2.4087222 down | -2.3816807 down |
| MMP21        | NM_147191    | matrix metalloproteinase 21                                                                         | -3.395997 down  | -2.1670947 down |
| NOL3         | NM_003946    | nucleolar protein 3 (apoptosis repressor with CARD domain)                                          | -2.4400847 down | -2.2851138 down |
| REM1         | NM_014012    | RAS (RAD and GEM)-like GTP-binding 1                                                                | -4.25901 down   | -2.496624 down  |
| CALHM3       | NM_001129742 | calcium homeostasis modulator 3                                                                     | -5.316171 down  | -2.9816327 down |
| EPS8L1       | NM_133180    | EPS8-like 1                                                                                         | -2.4781256 down | -2.1542614 down |
| Unknown      |              |                                                                                                     | -2.2233758 down | -2.0284348 down |
| Unknown      |              |                                                                                                     | -6.7672424 down | -3.6973152 down |
| ANKRD20A1P   |              | ankyrin repeat domain 20 family, member A11, pseudogene                                             | -3.5555363 down | -3.0089655 down |
| NEDD4L       | NM_001144967 | neural precursor cell expressed, developmentally down-regulated 4-like, E3 ubiquitin protein ligase | -3.1037552 down | -2.0620732 down |
|              | XR_247053    |                                                                                                     | -2.2172968 down | -2.6088536 down |
| CHRNA4       | NM_000744    | cholinergic receptor, nicotinic, alpha 4 (neuronal)                                                 | -4.4841604 down | -2.7507045 down |
| Unknown      |              |                                                                                                     | -2.018379 down  | -2.6687324 down |
| Unknown      |              |                                                                                                     | -9.651339 down  | -6.2553062 down |
|              | DA571569     |                                                                                                     | -2.917901 down  | -2.8202133 down |
| AMER3        | NM_152698    | APC membrane recruitment protein 3                                                                  | -4.2442575 down | -2.7864103 down |
| PGA3         | NM_001079807 | pepsinogen 3, group I (pepsinogen A)                                                                | -2.0987616 down | -2.4115167 down |
| GRHL3        | NM_198174    | grainyhead-like 3 (Drosophila)                                                                      | -3.3199573 down | -4.2577024 down |
| LOC100130872 | NR_024569    | uncharacterized LOC100130872                                                                        | -2.0307987 down | -2.1362271 down |
| LINC00935    | NR_029448    | long intergenic non-protein coding RNA 935                                                          | -3.4732542 down | -2.5803335 down |
| IRX4         | NM_016358    | iroquois homeobox 4                                                                                 | -2.993381 down  | -2.227684 down  |
| SETD5-AS1    | BC132680     | SETD5 antisense RNA 1                                                                               | -4.2791686 down | -5.0659294 down |
| LINC00483    |              | long intergenic non-protein coding RNA 483                                                          | -4.7961707 down | -3.1257324 down |
| EIF4E1B      | NM_001099408 | eukaryotic translation initiation factor 4E family member 1B                                        | -5.926982 down  | -3.3814898 down |
| Unknown      |              |                                                                                                     | -6.7825127 down | -3.352346 down  |
| PDE8B        | NM_003719    | phosphodiesterase 8B                                                                                | -2.2604287 down | -5.3174696 down |
| NRXN3        | NM_004796    | neurexin 3                                                                                          | -4.5228877 down | -2.1737566 down |
| LRRC73       | NM_001012974 | leucine rich repeat containing 73                                                                   | -3.81703 down   | -2.7284353 down |
| OR51A2       | NM_001004748 | olfactory receptor, family 51, subfamily A, member 2                                                | -2.7020066 down | -2.214204 down  |
| SLC16A10     | NM_018593    | solute carrier family 16 (aromatic amino acid transporter), member 10                               | -3.2704742 down | -2.1475823 down |
| Unknown      |              |                                                                                                     | -3.946461 down  | -2.2522726 down |
| CT47A11      | NM_173571    | cancer/testis antigen family 47, member A11                                                         | -6.4026427 down | -2.2315848 down |
| TBX3         | NM_016569    | T-box 3                                                                                             | -6.177232 down  | -3.092287 down  |
| LOC284454    | NR_036515    | uncharacterized LOC284454                                                                           | -3.7287028 down | -2.3870957 down |
| SEC61A2      | NM_018144    | Sec61 alpha 2 subunit (S. cerevisiae)                                                               | -2.2156138 down | -2.6974995 down |
| COL8A1       | NM_001850    | collagen, type VIII, alpha 1                                                                        | -4.2171135 down | -3.1609988 down |
| SYN3         | NM_133633    | synapsin III                                                                                        | -3.7954516 down | -2.006292 down  |
| SLC22A25     | NM_199352    | solute carrier family 22, member 25                                                                 | -7.330516 down  | -2.47531 down   |
| LOC149373    | NM_001256615 | uncharacterized LOC149373                                                                           | -4.3129115 down | -2.069769 down  |
| Unknown      |              |                                                                                                     | -3.4046166 down | -2.5725393 down |
| Unknown      |              |                                                                                                     | -2.4059758 down | -3.1031451 down |
| C19orf69     | NM_001130514 | chromosome 19 open reading frame 69                                                                 | -4.7379704 down | -2.3431609 down |
| NFATC2IP     | NM_032815    | nuclear factor of activated T-cells, cytoplasmic, calcineurin-dependent 2 interacting protein       | -3.1731696 down | -2.4465878 down |
| BTNL2        | NM_019602    | butyrophilin-like 2 (MHC class II associated)                                                       | -2.5240126 down | -2.7211523 down |
| HES3         | NM_001024598 | hes family bHLH transcription factor 3                                                              | -2.6068592 down | -2.6749797 down |
| UBD          | NM_006398    | ubiquitin D                                                                                         | -8.755354 down  | -4.809574 down  |
| OR7D4        | NM_001005191 | olfactory receptor, family 7, subfamily D, member 4                                                 | -5.6084228 down | -3.0526707 down |
| ENDOV        | NM_173627    | endonuclease V                                                                                      | -3.1270795 down | -3.2813058 down |
| Unknown      |              |                                                                                                     | -2.1880362 down | -3.242217 down  |
| S100B        |              | S100 calcium binding protein B                                                                      | -3.5035996 down | -2.3076413 down |
| TRIM46       | NM_025058    | tripartite motif containing 46                                                                      | -3.149517 down  | -3.551807 down  |
| CACNA1C      | NM_199460    | calcium channel, voltage-dependent, L type, alpha 1C subunit                                        | -5.3734813 down | -2.6821473 down |
| PRMT8        | NM_019854    | protein arginine methyltransferase 8                                                                | -2.8533008 down | -2.2988193 down |
| MGAT4C       | NM_013244    | mannosyl (alpha-1,3-)-glycoprotein beta-1,4-N-acetylglucosaminyltransferase, isozyme C (putative)   | -4.2813425 down | -2.0604637 down |

|              |              |                                                                        |                 |                 |
|--------------|--------------|------------------------------------------------------------------------|-----------------|-----------------|
| RBFOX2       | NM_001031695 | RNA binding protein, fox-1 homolog (C. elegans) 2                      | -9.846267 down  | -6.778945 down  |
| TMEM37       | XM_005263597 | transmembrane protein 37                                               | -2.3031223 down | -2.0115738 down |
| SLC22A2      | NM_003058    | solute carrier family 22 (organic cation transporter), member 2        | -2.4066129 down | -2.0932717 down |
| ANKRD20A12P  | NR_046228    | ankyrin repeat domain 20 family, member A12, pseudogene                | -5.7210774 down | -6.1331234 down |
| XLOC_014422  |              |                                                                        | -2.561916 down  | -2.7846134 down |
| CXorf28      | NR_038428    | chromosome X open reading frame 28                                     | -2.8776813 down | -2.0084805 down |
| Unknown      |              |                                                                        | -5.006759 down  | -2.9862378 down |
| LOC100129775 | AK094853     | uncharacterized LOC100129775                                           | -3.4907112 down | -3.8658996 down |
| MGC4859      |              | uncharacterized LOC79150                                               | -3.601921 down  | -2.8889797 down |
| SENP1        | NM_001267595 | SUMO1/sentrin specific peptidase 1                                     | -2.0336473 down | -2.44317 down   |
| CRB2         | NM_173689    | crumbs homolog 2 (Drosophila)                                          | -3.942032 down  | -3.0469072 down |
| BPIFA3       | NM_178466    | BPI fold containing family A, member 3                                 | -3.0791116 down | -2.1466963 down |
| SCN5A        | NM_001099404 | sodium channel, voltage-gated, type V, alpha subunit                   | -3.0009327 down | -2.1593676 down |
| LOC283856    |              | uncharacterized LOC283856                                              | -4.671689 down  | -3.9197576 down |
| PARVB        | AK309987     | parvin, beta                                                           | -3.1674705 down | -2.1484697 down |
|              | AK130794     |                                                                        | -4.6924896 down | -2.8214889 down |
| Unknown      |              |                                                                        | -2.339011 down  | -2.4623194 down |
| KCNJ6        | NM_002240    | potassium inwardly-rectifying channel, subfamily J, member 6           | -3.730596 down  | -2.2140284 down |
| FPGT-TNNI3K  | BX640903     | FPGT-TNNI3K readthrough                                                | -2.702092 down  | -3.0323894 down |
| AK7          | NM_152327    | adenylate kinase 7                                                     | -2.9305077 down | -2.3729737 down |
|              | AK097143     |                                                                        | -3.3003173 down | -2.0021162 down |
| LOC202181    | NR_026921    | SUMO-interacting motifs containing 1 pseudogene                        | -5.4216523 down | -6.883093 down  |
| Unknown      |              |                                                                        | -6.3917685 down | -4.0024467 down |
| ADAMTSL1     | NM_052866    | ADAMTS-like 1                                                          | -3.6237416 down | -2.2870672 down |
| VWA5B1       | AK125833     | von Willebrand factor A domain containing 5B1                          | -5.025445 down  | -4.0214868 down |
| HAS3         | NM_138612    | hyaluronan synthase 3                                                  | -4.259085 down  | -2.525828 down  |
| SNX30        | NM_001012994 | sorting nexin family member 30                                         | -2.8072846 down | -2.224706 down  |
| Unknown      |              |                                                                        | -2.3061244 down | -3.3599677 down |
| NKPD1        | NM_198478    | NTPase, KAP family P-loop domain containing 1                          | -3.886222 down  | -4.0329967 down |
| P4HA3        | NM_182904    | prolyl 4-hydroxylase, alpha polypeptide III                            | -2.8523128 down | -2.103879 down  |
| SLC26A9      | NM_052934    | solute carrier family 26 (anion exchanger), member 9                   | -3.2993114 down | -2.0560274 down |
| DEFB128      | NM_001037732 | defensin, beta 128                                                     | -2.5016863 down | -2.638117 down  |
| SPTSSB       | XM_005247164 | serine palmitoyltransferase, small subunit B                           | -5.6634626 down | -2.507794 down  |
| Unknown      |              |                                                                        | -3.7881436 down | -4.0071855 down |
|              | BF106382     |                                                                        | -3.0622535 down | -2.3401406 down |
| TPSD1        | NM_012217    | tryptase delta 1                                                       | -3.3138595 down | -2.5900114 down |
| ETV3         | NM_001145312 | ets variant 3                                                          | -4.211457 down  | -2.7701516 down |
| LOC101928058 | XM_005276314 | myosin IC heavy chain-like                                             | -2.5324035 down | -2.776681 down  |
| ZNF774       | NM_001004309 | zinc finger protein 774                                                | -3.901621 down  | -2.1446857 down |
| METTTL21A    | NM_001127395 | methyltransferase like 21A                                             | -5.2700067 down | -3.6845732 down |
|              | AK123993     |                                                                        | -3.710725 down  | -2.828009 down  |
| DGCR9        |              | DiGeorge syndrome critical region gene 9                               | -4.6057434 down | -2.7433918 down |
| MUC5B        | NM_002458    | mucin 5B, oligomeric mucus/gel-forming                                 | -10.756107 down | -6.858593 down  |
| HERC2P4      |              | hect domain and RLD 2 pseudogene 4                                     | -6.269283 down  | -3.6758735 down |
| LINC00969    | XR_110395    | long intergenic non-protein coding RNA 969                             | -2.264478 down  | -2.7566223 down |
| PRAMEF2      | NM_023014    | PRAME family member 2                                                  | -4.333282 down  | -2.755429 down  |
| GCLM         | NM_002061    | glutamate-cysteine ligase, modifier subunit                            | -2.7818973 down | -2.3291495 down |
| Unknown      |              |                                                                        | -7.0010934 down | -5.762676 down  |
| SLC35A4      | AF445025     | solute carrier family 35, member A4                                    | -3.9913979 down | -2.3749065 down |
| TBCD         | AL096745     | tubulin folding cofactor D                                             | -2.2289119 down | -3.2921207 down |
|              | AK000470     |                                                                        | -2.7995682 down | -2.1033428 down |
| Unknown      |              |                                                                        | -3.496711 down  | -2.5059135 down |
| RAB7B        | NM_177403    | RAB7B, member RAS oncogene family                                      | -2.3200176 down | -2.7598479 down |
| Unknown      |              |                                                                        | -2.8396058 down | -2.2084846 down |
| XRCC2        | NM_005431    | X-ray repair complementing defective repair in Chinese hamster cells 2 | -4.578571 down  | -3.9412048 down |
| SP6          | NM_001258248 | Sp6 transcription factor                                               | -4.552489 down  | -2.0697722 down |
| ALX1         | NM_006982    | ALX homeobox 1                                                         | -4.8283577 down | -2.365797 down  |
| C10orf71     | NM_001135196 | chromosome 10 open reading frame 71                                    | -4.1339903 down | -2.0601904 down |
| EMC1         |              | ER membrane protein complex subunit 1                                  | -3.1584673 down | -4.023962 down  |
| GGT6         | NM_153338    | gamma-glutamyltransferase 6                                            | -10.755072 down | -5.5791426 down |

|              |              |                                                                 |                 |                 |
|--------------|--------------|-----------------------------------------------------------------|-----------------|-----------------|
| NSAP11       | AY176665     | nervous system abundant protein 11                              | -4.7356954 down | -2.004151 down  |
| MASP2        | NM_006610    | mannan-binding lectin serine peptidase 2                        | -3.6281624 down | -3.7483637 down |
|              | BX108667     |                                                                 | -3.3677077 down | -2.2276397 down |
| KIAA0087     | NR_022006    | KIAA0087                                                        | -4.918724 down  | -2.3426142 down |
| LOC283693    | NR_036446    | actin, alpha 2, smooth muscle, aorta pseudogene                 | -2.600257 down  | -2.2174149 down |
| Unknown      |              |                                                                 | -5.801206 down  | -3.9314988 down |
| TTC7A        | NM_020458    | tetratricopeptide repeat domain 7A                              | -2.2556286 down | -2.294366 down  |
| Unknown      |              |                                                                 | -5.349309 down  | -2.5119946 down |
| BGN          | NM_001711    | biglycan                                                        | -7.392654 down  | -5.2434115 down |
| PADI3        | NM_016233    | peptidyl arginine deiminase, type III                           | -4.1503663 down | -2.3341827 down |
| C16orf95     | AK125749     | chromosome 16 open reading frame 95                             | -4.60003 down   | -2.8895736 down |
| SIGLEC6      | NM_001245    | sialic acid binding Ig-like lectin 6                            | -3.5347624 down | -5.1416054 down |
| FAM92A1P2    | NR_003612    | family with sequence similarity 92, member A3                   | -3.867607 down  | -5.862625 down  |
| Unknown      |              |                                                                 | -5.5634627 down | -3.0058002 down |
| LINC00277    | NR_026949    | long intergenic non-protein coding RNA 277                      | -4.986363 down  | -2.0005004 down |
| CACNA1G      | NM_018896    | calcium channel, voltage-dependent, T type, alpha 1G subunit    | -3.597668 down  | -2.7417939 down |
| C1orf21      | NM_030806    | chromosome 1 open reading frame 21                              | -2.2527265 down | -3.111706 down  |
|              | AF116661     |                                                                 | -4.683552 down  | -2.8661096 down |
| KIAA1161     | NM_020702    | KIAA1161                                                        | -2.454754 down  | -2.7705297 down |
| Unknown      |              |                                                                 | -3.0757117 down | -2.3838866 down |
| Unknown      |              |                                                                 | -3.3601573 down | -2.8170528 down |
| C1QL2        | NM_182528    | complement component 1, q subcomponent-like 2                   | -4.7173605 down | -4.247638 down  |
| LOC100996379 | XR_248076    | uncharacterized LOC100996379                                    | -2.7734199 down | -2.542685 down  |
| Unknown      |              |                                                                 | -5.515265 down  | -3.347469 down  |
| Unknown      |              |                                                                 | -2.7698796 down | -2.7305565 down |
| ILDR1        | NM_175924    | immunoglobulin-like domain containing receptor 1                | -3.5082798 down | -2.6286054 down |
| GAFA1        | AF190748     | FGF2-associated protein GAFA1                                   | -3.319671 down  | -2.0848186 down |
| LOC100499221 | AK127052     | uncharacterized LOC100499221                                    | -5.324082 down  | -4.90141 down   |
| HERC2        | NM_004667    | HECT and RLD domain containing E3 ubiquitin protein ligase 2    | -2.75267 down   | -2.2911088 down |
| VHL          | NM_000551    | von Hippel-Lindau tumor suppressor, E3 ubiquitin protein ligase | -4.829094 down  | -3.0923693 down |
| GRIA1        | NM_000827    | glutamate receptor, ionotropic, AMPA 1                          | -4.5990267 down | -2.0847723 down |
| Unknown      |              |                                                                 | -4.894907 down  | -2.5602794 down |
| RGL1         | NM_015149    | ral guanine nucleotide dissociation stimulator-like 1           | -6.9861145 down | -5.1065435 down |
| MPV17L       | NM_173803    | MPV17 mitochondrial membrane protein-like                       | -4.1107717 down | -3.6402934 down |
|              | BC014063     |                                                                 | -4.8932796 down | -3.6603844 down |
| NRIP3        | NM_020645    | nuclear receptor interacting protein 3                          | -3.287184 down  | -2.0406232 down |
| Unknown      |              |                                                                 | -3.3846116 down | -2.2177672 down |
| Unknown      |              |                                                                 | -4.2624636 down | -3.3741927 down |
| LOC100996465 | XM_003846784 | putative lung carcinoma-associated protein 10-like              | -4.5345583 down | -2.4019191 down |
| NTF3         | NM_002527    | neurotrophin 3                                                  | -4.462657 down  | -2.3882217 down |
| OR10A6       | NM_001004461 | olfactory receptor, family 10, subfamily A, member 6            | -5.114049 down  | -3.0233197 down |
| LOC284219    | AK094436     | uncharacterized LOC284219                                       | -10.057078 down | -6.937428 down  |
| CCDC9        | NM_015603    | coiled-coil domain containing 9                                 | -2.0740407 down | -2.431223 down  |
| OR4N4        | NM_001005241 | olfactory receptor, family 4, subfamily N, member 4             | -6.6908693 down | -4.0046897 down |
| DNM1P46      | NR_003260    | DNM1 pseudogene 46                                              | -4.1590767 down | -2.9753864 down |
| PDCL2        | NM_152401    | phosducin-like 2                                                | -2.151772 down  | -2.1179345 down |
| KIAA1751     | NM_001080484 | KIAA1751                                                        | -3.5649388 down | -2.0209827 down |
| XLOC_014512  |              |                                                                 | -2.6693015 down | -5.814292 down  |
| E2F7         | NM_203394    | E2F transcription factor 7                                      | -3.502249 down  | -2.8482833 down |
| FAM181B      | NM_175885    | family with sequence similarity 181, member B                   | -2.8712947 down | -2.804772 down  |
| AZFP         | AY371499     | AML-associated zinc finger protein                              | -4.4405746 down | -2.305171 down  |
| MDH1B        | NR_104261    | malate dehydrogenase 1B, NAD (soluble)                          | -3.5608828 down | -4.026212 down  |
| PGAM5        | NM_138575    | phosphoglycerate mutase family member 5                         | -2.3490632 down | -2.82386 down   |
| XLOC_014512  |              |                                                                 | -8.03557 down   | -4.8995767 down |
| LOC729609    |              | uncharacterized LOC729609                                       | -3.7811809 down | -2.7213964 down |
| DHRS4-AS1    | NR_023921    | DHRS4 antisense RNA 1                                           | -3.5561388 down | -3.4821274 down |
| GNG12        | NM_018841    | guanine nucleotide binding protein (G protein), gamma 12        | -3.0714355 down | -2.5622551 down |
| FAM86B3P     |              | family with sequence similarity 86, member A pseudogene         | -3.6985886 down | -3.8406982 down |
| ERVW-1       | NM_014590    | endogenous retrovirus group W, member 1                         | -5.1962247 down | -4.2838273 down |
| FAM201B      | XR_158980    | family with sequence similarity 201, member B                   | -4.2108583 down | -4.605173 down  |

|              |              |                                                                                             |                 |                 |
|--------------|--------------|---------------------------------------------------------------------------------------------|-----------------|-----------------|
| Unknown      |              |                                                                                             | -6.3695407 down | -5.1520066 down |
| Unknown      |              |                                                                                             | -4.2780185 down | -3.4537048 down |
| ARHGAP42     | NM_152432    | Rho GTPase activating protein 42                                                            | -3.8138444 down | -2.7685244 down |
| LINC01101    | NR_027181    | long intergenic non-protein coding RNA 1101                                                 | -2.2022698 down | -2.1107287 down |
| C8orf74      | NM_001040032 | chromosome 8 open reading frame 74                                                          | -7.1475515 down | -3.8976905 down |
| LOC100507547 | NR_037169    | uncharacterized LOC100507547                                                                | -2.9369998 down | -3.1023297 down |
| CPLX2        | NM_006650    | complexin 2                                                                                 | -5.9213643 down | -3.2364979 down |
| PRODH2       | NM_021232    | proline dehydrogenase (oxidase) 2                                                           | -5.200948 down  | -2.0751872 down |
| CD86         | NM_006889    | CD86 molecule                                                                               | -5.824963 down  | -6.0708394 down |
| SCGB1B2P     |              | secretoglobin, family 1B, member 2, pseudogene                                              | -3.4354215 down | -2.312933 down  |
| TBX4         | NM_018488    | T-box 4                                                                                     | -3.6303208 down | -2.0030367 down |
| FAM19A4      | NM_182522    | family with sequence similarity 19 (chemokine (C-C motif)-like), member A4                  | -4.174579 down  | -2.1570458 down |
| POU4F3       | NM_002700    | POU class 4 homeobox 3                                                                      | -3.7735963 down | -2.1781178 down |
|              | BC007749     |                                                                                             | -6.975558 down  | -4.605416 down  |
|              | XM_005249927 |                                                                                             | -3.7251582 down | -4.0899434 down |
| AMZ1         | NM_133463    | archaelysin family metalloproteinase 1                                                      | -3.3645036 down | -3.0072765 down |
| PWAR4        | NR_022010    | Prader Willi/Angelman region RNA 4                                                          | -9.453847 down  | -7.4043956 down |
| ALDH1L2      | NM_001034173 | aldehyde dehydrogenase 1 family, member L2                                                  | -2.764571 down  | -2.5476327 down |
| Unknown      |              |                                                                                             | -9.498351 down  | -21.25616 down  |
| ADAMTS4      | BC030812     | ADAM metalloproteinase with thrombospondin type 1 motif, 4                                  | -4.3887296 down | -2.774159 down  |
| VPS18        | NM_020857    | vacuolar protein sorting 18 homolog (S. cerevisiae)                                         | -2.131899 down  | -2.7445157 down |
| GRIA4        | NM_001077243 | glutamate receptor, ionotropic, AMPA 4                                                      | -2.7662363 down | -2.414727 down  |
| FER1L5       | NM_001113382 | fer-1-like 5 (C. elegans)                                                                   | -2.756342 down  | -2.0715592 down |
| ZNF852       | XM_001717544 | zinc finger protein 852                                                                     | -2.3718178 down | -2.7356296 down |
| RND1         | NM_014470    | Rho family GTPase 1                                                                         | -3.1681838 down | -2.352077 down  |
| TCEB3B       | NM_016427    | transcription elongation factor B polypeptide 3B (elongin A2)                               | -5.5670867 down | -3.5261405 down |
| C7orf10      | NM_024728    | chromosome 7 open reading frame 10                                                          | -3.4909778 down | -2.821668 down  |
| PROSER2      | NM_153256    | proline and serine-rich protein 2                                                           | -2.7859175 down | -2.5315373 down |
| Unknown      |              |                                                                                             | -4.8965826 down | -3.031054 down  |
| BNIP3L       | AF370457     | BCL2/adenovirus E1B 19kDa interacting protein 3-like                                        | -3.117538 down  | -2.8183804 down |
| FAM222A-AS1  | NR_026661    | FAM222A antisense RNA 1                                                                     | -3.2355976 down | -2.1342783 down |
|              | AK122833     |                                                                                             | -4.0080695 down | -2.378262 down  |
| MCC          | NM_001085377 | mutated in colorectal cancers                                                               | -6.3913565 down | -2.6274388 down |
| C12orf80     | NM_001242696 | chromosome 12 open reading frame 80                                                         | -2.9636812 down | -2.4312103 down |
| IFFO1        | NR_036467    | intermediate filament family orphan 1                                                       | -3.801478 down  | -2.5381324 down |
| Unknown      |              |                                                                                             | -6.240865 down  | -2.6310046 down |
|              | BX537909     |                                                                                             | -2.7614732 down | -2.0076368 down |
| KCNB2        | NM_004770    | potassium voltage-gated channel, Shab-related subfamily, member 2                           | -5.579362 down  | -2.4696224 down |
| BMPER        | NM_133468    | BMP binding endothelial regulator                                                           | -4.3178067 down | -2.4310462 down |
| Unknown      |              |                                                                                             | -3.7011566 down | -3.5182805 down |
| LOC400553    | XR_111612    | uncharacterized LOC400553                                                                   | -5.2414927 down | -5.910486 down  |
| NUTM2F       | NM_017561    | NUT family member 2F                                                                        | -3.4455528 down | -2.226387 down  |
|              |              |                                                                                             | -2.7774398 down | -2.2071064 down |
| DNMT3A       | NM_175629    | DNA (cytosine-5-)-methyltransferase 3 alpha                                                 | -2.0813985 down | -2.0584514 down |
| SPAG17       | NM_206996    | sperm associated antigen 17                                                                 | -3.2783108 down | -2.1135762 down |
| ARHGAP21     | BX537570     | Rho GTPase activating protein 21                                                            | -3.1821902 down | -2.3107944 down |
| Unknown      |              |                                                                                             | -2.4048257 down | -2.2358017 down |
| LOC100131066 | AK126015     | uncharacterized LOC100131066                                                                | -5.14673 down   | -2.6286132 down |
|              | XR_248227    |                                                                                             | -4.2758546 down | -2.2441561 down |
| SERPINB7     | NM_001040147 | serpin peptidase inhibitor, clade B (ovalbumin), member 7                                   | -3.9667935 down | -2.9745972 down |
| GABRB1       | AK296023     | gamma-aminobutyric acid (GABA) A receptor, beta 1                                           | -2.4437363 down | -2.3036993 down |
|              | AK127846     |                                                                                             | -2.835314 down  | -3.3377197 down |
|              | XR_247266    |                                                                                             | -3.9648254 down | -2.3169346 down |
| LAMC2        | NM_005562    | laminin, gamma 2                                                                            | -2.598634 down  | -2.3459158 down |
| YWHAE        | AK296555     | tyrosine 3-monooxygenase/tryptophan 5-monooxygenase activation protein, epsilon polypeptide | -4.3042426 down | -2.908293 down  |
| LOC100507547 | NR_037169    | uncharacterized LOC100507547                                                                | -3.0497594 down | -2.4733112 down |
| MAP3K6       | NM_004672    | mitogen-activated protein kinase kinase kinase 6                                            | -2.1583643 down | -2.601848 down  |
| LOC728158    | XR_246201    | hCG2044975                                                                                  | -4.0380673 down | -2.263453 down  |
| C20orf85     | NM_178456    | chromosome 20 open reading frame 85                                                         | -3.6901999 down | -2.8147066 down |

|              |                  |                                                          |            |      |            |      |
|--------------|------------------|----------------------------------------------------------|------------|------|------------|------|
| Unknown      |                  |                                                          | -3.8055658 | down | -3.5980184 | down |
| PER2         | NM_022817        | period circadian clock 2                                 | -2.111167  | down | -2.9666555 | down |
| CDH4         | NM_001794        | cadherin 4, type 1, R-cadherin (retinal)                 | -5.5603046 | down | -6.0878124 | down |
|              | 02-mar NM_017898 | mitochondrial amidoxime reducing component 2             | -2.674826  | down | -2.0407164 | down |
| CDH2         | NM_001792        | cadherin 2, type 1, N-cadherin (neuronal)                | -4.583503  | down | -3.714384  | down |
| C9orf131     | NM_203299        | chromosome 9 open reading frame 131                      | -2.0848014 | down | -2.3778877 | down |
|              | BC010535         |                                                          | -2.0297146 | down | -2.4203024 | down |
| GH2          | NM_022558        | growth hormone 2                                         | -3.3913367 | down | -2.3368669 | down |
| MYO1C        | NM_033375        | myosin IC                                                | -2.2141192 | down | -2.173801  | down |
| GTF2IRD2B    | NM_001003795     | GTF2I repeat domain containing 2B                        | -2.1344588 | down | -2.7550595 | down |
| LOC101059906 | XM_003959933     | collagen alpha-1(XXVII) chain-like                       | -2.3530664 | down | -2.4644034 | down |
| BICC1        | NM_001080512     | bicaudal C homolog 1 (Drosophila)                        | -4.6057963 | down | -3.3942635 | down |
| HFE2         | NM_213653        | hemochromatosis type 2 (juvenile)                        | -3.113686  | down | -2.420331  | down |
| PRDM15       | NM_001282934     | PR domain containing 15                                  | -2.801667  | down | -2.3053489 | down |
| ENTPD8       | NM_001033113     | ectonucleoside triphosphate diphosphohydrolase 8         | -6.5482965 | down | -3.736031  | down |
| TECPR2       | NM_001172631     | tectorin beta-propeller repeat containing 2              | -4.199432  | down | -2.1858718 | down |
| Unknown      |                  |                                                          | -8.630097  | down | -3.782386  | down |
| Unknown      |                  |                                                          | -4.741531  | down | -4.886796  | down |
| LOC284581    | AK094426         | uncharacterized LOC284581                                | -14.301185 | down | -9.800617  | down |
| THNSL2       | NM_001244676     | threonine synthase-like 2 (S. cerevisiae)                | -4.398632  | down | -3.135761  | down |
| SPACA1       | NM_030960        | sperm acrosome associated 1                              | -3.7234159 | down | -3.5610242 | down |
| MAD2L2       |                  | MAD2 mitotic arrest deficient-like 2 (yeast)             | -3.8341029 | down | -3.2875857 | down |
| FAM27A       | NR_024060        | family with sequence similarity 27, member A             | -2.543885  | down | -2.4772813 | down |
| FUT11        | NM_001284194     | fucosyltransferase 11 (alpha (1,3) fucosyltransferase)   | -2.0877993 | down | -2.0068507 | down |
| Unknown      |                  |                                                          | -2.967473  | down | -2.789328  | down |
| Unknown      |                  |                                                          | -5.7256427 | down | -2.1246498 | down |
|              | AK021797         |                                                          | -4.1011076 | down | -2.5752614 | down |
| FAM3A        | NM_001171134     | family with sequence similarity 3, member A              | -2.1458092 | down | -2.1456265 | down |
| ARHGEF35     | NM_001003702     | Rho guanine nucleotide exchange factor (GEF) 35          | -5.7877855 | down | -2.4864452 | down |
| NS3BP        | NR_046316        | NS3BP                                                    | -2.9254448 | down | -2.2801344 | down |
| HELT         | NM_001029887     | helt bHLH transcription factor                           | -3.549902  | down | -2.0148091 | down |
| C4orf19      | NM_018302        | chromosome 4 open reading frame 19                       | -2.7179587 | down | -2.4065623 | down |
| POU6F2       | NM_007252        | POU class 6 homeobox 2                                   | -3.8951123 | down | -2.414026  | down |
| FAM95B1      |                  | family with sequence similarity 95, member B1            | -3.8343315 | down | -2.5860279 | down |
| LOC63930     |                  | uncharacterized LOC63930                                 | -3.9411638 | down | -2.8614426 | down |
| BMP8A        | NM_181809        | bone morphogenetic protein 8a                            | -4.3716955 | down | -2.676179  | down |
| LINC00301    | NR_026946        | long intergenic non-protein coding RNA 301               | -8.623594  | down | -4.916239  | down |
| HIST3H2A     | NM_033445        | histone cluster 3, H2a                                   | -2.01784   | down | -2.0041134 | down |
| COL6A5       | NM_153264        | collagen, type VI, alpha 5                               | -2.608723  | down | -2.7317326 | down |
| ZNF704       | NM_001033723     | zinc finger protein 704                                  | -6.9241543 | down | -3.5323913 | down |
| LOC727982    | NR_034134        | uncharacterized LOC727982                                | -2.338986  | down | -2.262424  | down |
|              |                  |                                                          | -4.768012  | down | -3.0192158 | down |
|              |                  |                                                          | -3.514974  | down | -3.394756  | down |
| MAGEE2       | NM_138703        | melanoma antigen family E, 2                             | -3.6469004 | down | -2.00022   | down |
| EFCAB10      | NR_027068        | EF-hand calcium binding domain 10                        | -3.6122298 | down | -2.418079  | down |
| FAM41C       | NR_027055        | family with sequence similarity 41, member C             | -5.4968333 | down | -3.758045  | down |
| XLOC_014512  |                  |                                                          | -4.5733705 | down | -3.4781518 | down |
| CLDN14       | NM_144492        | claudin 14                                               | -8.394292  | down | -3.1466837 | down |
| TMEM179      | NM_001286390     | transmembrane protein 179                                | -4.006581  | down | -2.9599962 | down |
| KCTD3        | NM_016121        | potassium channel tetramerization domain containing 3    | -3.1514747 | down | -2.715921  | down |
| PROKR1       | NM_138964        | prokineticin receptor 1                                  | -4.421828  | down | -2.236533  | down |
|              |                  |                                                          | -7.5295234 | down | -2.791482  | down |
|              |                  |                                                          | -3.4022899 | down | -2.2949421 | down |
| FLJ22763     | NR_033977        | uncharacterized LOC401081                                | -4.0255485 | down | -2.2647824 | down |
|              |                  |                                                          | -4.2093396 | down | -2.5410364 | down |
| TMEM184A     | NM_001097620     | transmembrane protein 184A                               | -3.654196  | down | -3.2429647 | down |
| FERMT1       | NM_017671        | fermitin family member 1                                 | -3.6510782 | down | -2.7994456 | down |
| C14orf64     |                  | chromosome 14 open reading frame 64                      | -3.591492  | down | -2.30505   | down |
| PRKAR1B      | NM_001164761     | protein kinase, cAMP-dependent, regulatory, type I, beta | -2.594742  | down | -2.5395684 | down |
|              |                  |                                                          | -2.0164742 | down | -3.3423624 | down |
| TNFRSF19     | BC035796         | tumor necrosis factor receptor superfamily, member 19    | -5.3742495 | down | -6.1958547 | down |
| SYT2         | NM_001136504     | synaptotagmin II                                         | -3.6701791 | down | -3.063535  | down |

|              |              |                                                                         |                 |                 |
|--------------|--------------|-------------------------------------------------------------------------|-----------------|-----------------|
| SLC15A1      | AB001328     | solute carrier family 15 (oligopeptide transporter), member 1           | -4.0305743 down | -2.1222937 down |
| HIST1H2BE    | NM_003523    | histone cluster 1, H2be                                                 | -2.5931947 down | -2.0254223 down |
| MANEA        | NM_024641    | mannosidase, endo-alpha                                                 | -3.0877209 down | -2.4143198 down |
| LOC100128591 | AK128705     | uncharacterized LOC100128591                                            | -3.759605 down  | -3.0677636 down |
| VRTN         | NM_018228    | vertebrae development associated                                        | -5.439992 down  | -3.349385 down  |
| FAM149A      | NM_015398    | family with sequence similarity 149, member A                           | -3.5005147 down | -2.9712298 down |
| FUBP3        | NM_003934    | far upstream element (FUSE) binding protein 3                           | -5.2330184 down | -2.7376785 down |
| HSD11B2      | NM_000196    | hydroxysteroid (11-beta) dehydrogenase 2                                | -3.596185 down  | -2.1148684 down |
| NLGN4X       | NM_001282145 | neuroigin 4, X-linked                                                   | -3.998283 down  | -2.2987318 down |
| TLCD2        | NM_001164407 | TLC domain containing 2                                                 | -5.3781314 down | -2.198005 down  |
| LOC284950    | NR_038888    | uncharacterized LOC284950                                               | -6.351751 down  | -2.9387305 down |
| SCRT2        | NM_033129    | scratch family zinc finger 2                                            | -4.027731 down  | -2.2713118 down |
|              |              |                                                                         | -2.1838965 down | -4.360089 down  |
| ANGPTL2      | NM_012098    | angiotensin-like 2                                                      | -4.095893 down  | -2.3287864 down |
|              | XM_001716650 |                                                                         | -2.5670235 down | -2.132765 down  |
| KCNK4        | NM_033310    | potassium channel, subfamily K, member 4                                | -2.068595 down  | -2.363637 down  |
| LOC389831    | NM_001242480 | uncharacterized LOC389831                                               | -3.2388964 down | -3.4519672 down |
|              | AL833920     |                                                                         | -3.602652 down  | -2.6940622 down |
| C14orf178    | NM_174943    | chromosome 14 open reading frame 178                                    | -4.598357 down  | -2.2258563 down |
| PDE4DIP      | NM_022359    | phosphodiesterase 4D interacting protein                                | -5.818242 down  | -3.0068479 down |
| KRTAP10-5    | NM_198694    | keratin associated protein 10-5                                         | -4.0719576 down | -3.916554 down  |
| MGP          | NM_000900    | matrix Gla protein                                                      | -2.911317 down  | -2.1918366 down |
| KRTAP3-3     | NM_033185    | keratin associated protein 3-3                                          | -4.4346056 down | -2.7511568 down |
| LOC100129785 | AK125285     | uncharacterized LOC100129785                                            | -8.948574 down  | -7.7528396 down |
| SUV420H2     | AK304562     | suppressor of variegation 4-20 homolog 2 (Drosophila)                   | -4.5760546 down | -2.475215 down  |
| ZC3H12D      | NM_207360    | zinc finger CCCH-type containing 12D                                    | -5.7286477 down | -3.0985065 down |
|              |              |                                                                         | -5.549519 down  | -2.541297 down  |
|              |              |                                                                         | -2.9380908 down | -2.0397563 down |
| ST3GAL4      | AK021929     | ST3 beta-galactoside alpha-2,3-sialyltransferase 4                      | -4.5439243 down | -7.044811 down  |
|              |              |                                                                         | -2.9376445 down | -2.4711325 down |
|              |              |                                                                         | -2.830846 down  | -2.2931592 down |
|              |              |                                                                         | -2.7486212 down | -3.1073565 down |
|              |              |                                                                         | -2.8975022 down | -2.364695 down  |
| SLC30A2      | NM_001004434 | solute carrier family 30 (zinc transporter), member 2                   | -2.344598 down  | -2.9452925 down |
| SLC24A1      | NM_004727    | solute carrier family 24 (sodium/potassium/calcium exchanger), member 1 | -3.9151382 down | -2.394274 down  |
| ZNF468       | NM_001277120 | zinc finger protein 468                                                 | -2.827076 down  | -2.8107257 down |
| CATSPERD     | AK128088     | catsper channel auxiliary subunit delta                                 | -4.623141 down  | -3.2647536 down |
| ARHGEF17     | NM_014786    | Rho guanine nucleotide exchange factor (GEF) 17                         | -2.4432623 down | -2.1165524 down |
|              |              |                                                                         | -4.3227043 down | -2.2147217 down |
| HMGCS2       | NM_005518    | 3-hydroxy-3-methylglutaryl-CoA synthase 2 (mitochondrial)               | -2.4938753 down | -2.0311007 down |
| GRXCR2       | NM_001080516 | glutaredoxin, cysteine rich 2                                           | -4.0122957 down | -2.2865386 down |
| ONECUT1      | NM_004498    | one cut homeobox 1                                                      | -4.9073195 down | -2.0443244 down |
| OR13D1       | NM_001004484 | olfactory receptor, family 13, subfamily D, member 1                    | -2.4869776 down | -2.1143165 down |
| OR51I1       | NM_001005288 | olfactory receptor, family 51, subfamily I, member 1                    | -5.992391 down  | -3.1008372 down |
| KCNE4        | NM_080671    | potassium voltage-gated channel, Isk-related family, member 4           | -3.4151103 down | -5.6199284 down |
|              | U66047       |                                                                         | -7.5220237 down | -4.487957 down  |
| FGFR3        | NM_000142    | fibroblast growth factor receptor 3                                     | -2.0702164 down | -3.825862 down  |
| AFAP1-AS1    | NR_026892    | AFAP1 antisense RNA 1                                                   | -3.780862 down  | -2.1451848 down |
| ACTRT3       | NM_032487    | actin-related protein T3                                                | -4.7366433 down | -3.146077 down  |
|              |              |                                                                         | -3.2747273 down | -2.0443058 down |
|              |              |                                                                         | -2.1157718 down | -2.325933 down  |
| FLJ46066     |              | uncharacterized LOC401103                                               | -4.485975 down  | -2.317953 down  |
|              |              |                                                                         | -2.4015107 down | -2.5467656 down |
| DHRS2        | NM_182908    | dehydrogenase/reductase (SDR family) member 2                           | -6.8590326 down | -3.0704036 down |
| REEP6        | NM_138393    | receptor accessory protein 6                                            | -2.575719 down  | -2.875117 down  |
| RCOR2        | NM_173587    | REST corepressor 2                                                      | -4.64733 down   | -3.462535 down  |
|              | AK025061     |                                                                         | -8.363573 down  | -4.825887 down  |
| FAT3         | NM_001008781 | FAT atypical cadherin 3                                                 | -4.0956755 down | -2.8852012 down |
| KRT222       | NM_152349    | keratin 222                                                             | -7.3488154 down | -5.3459196 down |
|              |              |                                                                         | -4.4342446 down | -3.6658337 down |

|              |              |                                                                |                 |                 |
|--------------|--------------|----------------------------------------------------------------|-----------------|-----------------|
| SCN9A        | NM_002977    | sodium channel, voltage-gated, type IX, alpha subunit          | -5.770431 down  | -3.8044028 down |
| PROM2        | NM_001165978 | prominin 2                                                     | -9.506657 down  | -7.005659 down  |
| SRCIN1       | NM_025248    | SRC kinase signaling inhibitor 1                               | -3.8380826 down | -4.1044054 down |
| PIP          | NM_002652    | prolactin-induced protein                                      | -10.857858 down | -7.557286 down  |
| KRTAP9-1     | NM_001190460 | keratin associated protein 9-1                                 | -3.4712448 down | -2.895403 down  |
| EVA1A        | NM_032181    | eva-1 homolog A (C. elegans)                                   | -2.7754946 down | -2.3179898 down |
| PCDHGA3      | NM_032011    | protocadherin gamma subfamily A, 3                             | -3.5279963 down | -2.0073564 down |
| SHANK1       | NM_016148    | SH3 and multiple ankyrin repeat domains 1                      | -5.3425636 down | -4.383421 down  |
| STGC3        | AY078383     | uncharacterized STGC3                                          | -3.1621144 down | -2.004961 down  |
| LOC101928841 | XM_005275740 | collagen alpha-1(II) chain-like                                | -3.6128876 down | -3.0595014 down |
| LOC100130452 | NR_034036    | uncharacterized LOC100130452                                   | -3.787305 down  | -2.2544987 down |
| NR2F1        | NM_005654    | nuclear receptor subfamily 2, group F, member 1                | -3.382628 down  | -2.361522 down  |
| ARHGAP39     | NM_025251    | Rho GTPase activating protein 39                               | -5.1775594 down | -2.9829621 down |
| C3orf84      | NM_001080528 | chromosome 3 open reading frame 84                             | -5.4438753 down | -3.8746393 down |
| C10orf115    | NR_103721    | chromosome 10 open reading frame 115                           | -3.7585018 down | -2.6245832 down |
| SNORA70B     | BQ029156     | small nucleolar RNA, H/ACA box 70B                             | -2.2360396 down | -2.2352493 down |
|              | AK128215     |                                                                | -2.3471217 down | -2.1363661 down |
|              | BX093647     |                                                                | -3.8331578 down | -2.2324064 down |
| OR2T4        | NM_001004696 | olfactory receptor, family 2, subfamily T, member 4            | -4.949648 down  | -2.253095 down  |
| TBC1D28      | NM_001039397 | TBC1 domain family, member 28                                  | -3.4437764 down | -2.87844 down   |
| FAM212A      | NM_203370    | family with sequence similarity 212, member A                  | -2.2688856 down | -2.4272845 down |
| LOC100129048 | AK128074     | uncharacterized LOC100129048                                   | -4.081966 down  | -2.5689895 down |
| SSX4B        | NM_001034832 | synovial sarcoma, X breakpoint 4B                              | -4.847469 down  | -4.047795 down  |
| RNF150       | NM_020724    | ring finger protein 150                                        | -8.132386 down  | -5.1244707 down |
| LOC647983    | AK126828     | uncharacterized LOC647983                                      | -3.9270349 down | -4.8871355 down |
| GOLGA2P2Y    | NR_001555    | golgin A2 pseudogene 2, Y-linked                               | -3.5396156 down | -2.5211184 down |
| LINC00314    | NR_027246    | long intergenic non-protein coding RNA 314                     | -3.850291 down  | -2.2244236 down |
| LRRC46       | NM_033413    | leucine rich repeat containing 46                              | -2.1864002 down | -2.0385394 down |
| DGCR10       | NR_026651    | DiGeorge syndrome critical region gene 10 (non-protein coding) | -7.111806 down  | -3.6058676 down |
|              | AK094155     |                                                                | -4.5506506 down | -5.0520654 down |
| LENG9        | NM_198988    | leukocyte receptor cluster (LRC) member 9                      | -3.007068 down  | -2.007832 down  |
| C16orf3      | NM_001214    | chromosome 16 open reading frame 3                             | -7.0938406 down | -5.961076 down  |
| UMODL1       | NM_001199528 | uromodulin-like 1                                              | -3.8491638 down | -4.0061846 down |
| PCDHB8       | NM_019120    | protocadherin beta 8                                           | -4.534865 down  | -2.515205 down  |
| SIX3         | NM_005413    | SIX homeobox 3                                                 | -4.537231 down  | -3.9609032 down |
| AGFG2        | NM_006076    | ArfGAP with FG repeats 2                                       | -2.2483902 down | -2.0649567 down |
| OR2AT4       | NM_001005285 | olfactory receptor, family 2, subfamily AT, member 4           | -5.2183795 down | -3.5410466 down |
| SEC24A       | NM_001252231 | SEC24 family member A                                          | -2.5152516 down | -2.012962 down  |
| LRRC19       | NM_022901    | leucine rich repeat containing 19                              | -6.2985168 down | -3.5081592 down |
| TSSK1B       | NM_032028    | testis-specific serine kinase 1B                               | -5.448901 down  | -2.1378126 down |
| LOC101930210 | XR_246852    | protein capicua homolog                                        | -5.429978 down  | -2.7558503 down |
| ARMS2        | NM_001099667 | age-related maculopathy susceptibility 2                       | -3.8944674 down | -2.514969 down  |
| PAX2         | NM_003990    | paired box 2                                                   | -5.113308 down  | -4.706431 down  |
| LOC284014    | AK095567     | uncharacterized LOC284014                                      | -5.84957 down   | -3.6832788 down |
|              |              |                                                                | -3.2407732 down | -3.682595 down  |
|              |              |                                                                | -4.3227715 down | -3.0128133 down |
| INMT         | NM_001199219 | indolethylamine N-methyltransferase                            | -5.000981 down  | -4.5414267 down |
| STRC         | NM_153700    | stereocilin                                                    | -3.7172263 down | -2.3872378 down |
| XLOC_014512  |              |                                                                | -5.1569023 down | -2.4237964 down |
|              |              |                                                                | -2.342658 down  | -2.1300905 down |
| C7orf61      | NM_001004323 | chromosome 7 open reading frame 61                             | -3.8604336 down | -4.073289 down  |
| RNASET2      | AK124363     | ribonuclease T2                                                | -5.3448896 down | -5.269457 down  |
| HELZ2        | BC104974     | helicase with zinc finger 2, transcriptional coactivator       | -2.06229 down   | -2.3447983 down |
| GSN-AS1      | NR_103560    | GSN antisense RNA 1                                            | -6.0970016 down | -2.933544 down  |
| LOC339539    |              | uncharacterized LOC339539                                      | -5.9084177 down | -2.9785721 down |
|              |              |                                                                | -3.372966 down  | -2.9898376 down |
| OR7G2        | NM_001005193 | olfactory receptor, family 7, subfamily G, member 2            | -3.580863 down  | -2.5025396 down |
| PAPPA        | NM_002581    | pregnancy-associated plasma protein A, pappalysin 1            | -5.3291507 down | -2.2928572 down |
| KRTAP19-1    | NM_181607    | keratin associated protein 19-1                                | -6.35791 down   | -6.9071665 down |
|              | BQ719082     |                                                                | -2.2931893 down | -3.9675622 down |
|              |              |                                                                | -3.1420896 down | -2.0686378 down |
|              |              |                                                                | -4.8877363 down | -2.0024207 down |

|              |              |                                                                            |                 |                 |
|--------------|--------------|----------------------------------------------------------------------------|-----------------|-----------------|
| MAGEC2       | NM_016249    | melanoma antigen family C, 2                                               | -2.90552 down   | -3.9414883 down |
| ZNF248       | BC021819     | zinc finger protein 248                                                    | -3.8065662 down | -2.340402 down  |
| SULT4A1      | NM_014351    | sulfotransferase family 4A, member 1                                       | -4.77159 down   | -3.5427861 down |
| DCUN1D2      | NM_001014283 | DCN1, defective in cullin neddylation 1, domain containing 2               | -4.7389073 down | -3.6211264 down |
| LINC00551    |              | long intergenic non-protein coding RNA 551                                 | -6.7207165 down | -2.9179118 down |
| LOC100506191 | AF289610     | uncharacterized LOC100506191                                               | -6.762854 down  | -2.3440614 down |
| PRDX4        | XM_005274438 | peroxiredoxin 4                                                            | -5.593989 down  | -2.304706 down  |
|              |              |                                                                            | -2.4713347 down | -2.0758712 down |
|              |              |                                                                            | -4.241283 down  | -2.5028021 down |
| GPSM1        | NM_015597    | G-protein signaling modulator 1                                            | -7.4389806 down | -3.4216862 down |
| C2CD4D       | NM_001136003 | C2 calcium-dependent domain containing 4D                                  | -2.365709 down  | -2.1858833 down |
| HIST1H4E     | NM_003545    | histone cluster 1, H4e                                                     | -2.2334175 down | -2.8773859 down |
| HCAR1        | NM_032554    | hydroxycarboxylic acid receptor 1                                          | -5.485897 down  | -2.687955 down  |
|              | BG957402     |                                                                            | -7.5299973 down | -2.1933568 down |
| ZDHC8P1      | NR_003950    | zinc finger, DHHC-type containing 8 pseudogene 1                           | -6.426266 down  | -3.9944594 down |
| IKBKB        | AK309052     | inhibitor of kappa light polypeptide gene enhancer in B-cells, kinase beta | -2.5327141 down | -2.0707302 down |
| CASC8        | NR_024393    | cancer susceptibility candidate 8 (non-protein coding)                     | -4.968937 down  | -2.752713 down  |
|              |              |                                                                            | -3.1215482 down | -3.951643 down  |
| CDHR5        | NM_031264    | cadherin-related family member 5                                           | -3.7579374 down | -2.1542735 down |
| TNFSF11      | NM_003701    | tumor necrosis factor (ligand) superfamily, member 11                      | -4.0673733 down | -3.0199182 down |
|              | AB529275     |                                                                            | -5.685839 down  | -2.7506073 down |
|              | BC069659     |                                                                            | -5.8605723 down | -3.5412123 down |
| LOC100133091 | NR_029411    | uncharacterized LOC100133091                                               | -3.669263 down  | -3.6314611 down |
|              | XR_241347    |                                                                            | -4.2305098 down | -2.3596847 down |
| HCP5B        | BC035659     | HLA complex P5B (non-protein coding)                                       | -2.7624404 down | -2.2379448 down |
| MBL1P        |              | mannose-binding lectin (protein A) 1, pseudogene                           | -4.385063 down  | -2.250458 down  |
| OR2D3        | NM_001004684 | olfactory receptor, family 2, subfamily D, member 3                        | -6.4077725 down | -2.0092852 down |
| OR52W1       | NM_001005178 | olfactory receptor, family 52, subfamily W, member 1                       | -5.795704 down  | -2.0155756 down |
| HIST1H4L     | NM_003546    | histone cluster 1, H4l                                                     | -3.6117704 down | -2.3230183 down |
| POLR3G       | NM_006467    | polymerase (RNA) III (DNA directed) polypeptide G (32kD)                   | -4.5163455 down | -4.865662 down  |
|              | AK128523     |                                                                            | -2.950879 down  | -3.2098026 down |
|              |              |                                                                            | -4.7508554 down | -2.2627273 down |
| SHROOM4      | NM_020717    | shroom family member 4                                                     | -3.1549098 down | -2.698823 down  |
| KIAA1598     | NM_001258299 | KIAA1598                                                                   | -3.210234 down  | -2.2871034 down |
|              |              |                                                                            | -4.5786552 down | -3.6364934 down |
| ODF2L        | NM_001007022 | outer dense fiber of sperm tails 2-like                                    | -2.8438332 down | -2.6571915 down |
|              | XR_158963    |                                                                            | -3.9666255 down | -3.4660625 down |
| LOC100131581 | AK092544     | uncharacterized LOC100131581                                               | -4.9146338 down | -3.0167692 down |
| GDF10        | NM_004962    | growth differentiation factor 10                                           | -2.9069853 down | -3.432062 down  |
| SLC35F2      | NM_017515    | solute carrier family 35, member F2                                        | -3.9931924 down | -4.473814 down  |
| ORAOV1       | XM_005274423 | oral cancer overexpressed 1                                                | -2.6955535 down | -2.090473 down  |
| LOC729080    | NR_033244    | glycine cleavage system protein H (aminomethyl carrier) pseudogene         | -2.50403 down   | -4.1445174 down |
| TSPEAR       | NM_144991    | thrombospondin-type laminin G domain and EAR repeats                       | -3.7105336 down | -2.1994097 down |
| GPR157       | NM_024980    | G protein-coupled receptor 157                                             | -4.7851667 down | -2.2411687 down |
| GOLGA6L10    | NM_001164465 | golgin A6 family-like 10                                                   | -11.504027 down | -6.690217 down  |
|              |              |                                                                            | -4.657573 down  | -3.3173008 down |
| TIAL1        | AB209260     | TIA1 cytotoxic granule-associated RNA binding protein-like 1               | -3.5871084 down | -2.5260284 down |
| LINC00205    | AF426264     | long intergenic non-protein coding RNA 205                                 | -3.2771027 down | -2.068929 down  |
| LOC100128653 | XR_108727    | uncharacterized LOC100128653                                               | -4.25126 down   | -2.6321714 down |
| GUCA2B       | NM_007102    | guanylate cyclase activator 2B (uroguanylin)                               | -2.9126515 down | -2.9069526 down |
| LOC440461    | NR_027283    | Rho GTPase activating protein 27 pseudogene                                | -3.0236762 down | -2.007196 down  |
|              | AL833395     |                                                                            | -4.758976 down  | -4.232102 down  |
|              |              |                                                                            | -4.334282 down  | -2.4203575 down |
| ADAM12       | NM_003474    | ADAM metalloproteinase domain 12                                           | -6.5722375 down | -5.1799927 down |
| PCBP3-OT1    | AK126016     | PCBP3 overlapping transcript (non-protein coding)                          | -4.3989706 down | -4.1296663 down |
| XLOC_014512  |              |                                                                            | -3.846768 down  | -3.3598876 down |
| KRTAP4-7     | NM_033061    | keratin associated protein 4-7                                             | -2.7487543 down | -2.7129662 down |
| ZNF577       |              | zinc finger protein 577                                                    | -4.8343444 down | -2.2719307 down |
| XLOC_014512  |              |                                                                            | -3.0384092 down | -6.1747327 down |



|           |              |                                                                 |                 |                 |
|-----------|--------------|-----------------------------------------------------------------|-----------------|-----------------|
| UNC5B     | NM_170744    | unc-5 homolog B (C. elegans)                                    | -4.787286 down  | -2.8932836 down |
|           |              |                                                                 | -6.249618 down  | -3.1547675 down |
| DCAF8L1   | NM_001017930 | DDB1 and CUL4 associated factor 8-like 1                        | -2.110095 down  | -2.2685955 down |
| GRIK4     | NM_001282470 | glutamate receptor, ionotropic, kainate 4                       | -7.2889075 down | -5.004351 down  |
| MYO3A     | NM_017433    | myosin IIIA                                                     | -7.0374346 down | -6.171576 down  |
| VSX2      | NM_182894    | visual system homeobox 2                                        | -3.971455 down  | -2.4018989 down |
| LIPH      | NM_139248    | lipase, member H                                                | -4.1432076 down | -2.4428647 down |
|           |              |                                                                 | -2.7833745 down | -2.495093 down  |
| MARK4     | NM_031417    | MAP/microtubule affinity-regulating kinase 4                    | -3.4606154 down | -2.6387324 down |
| TSPAN16   | NM_012466    | tetraspanin 16                                                  | -3.8295674 down | -5.547237 down  |
| LOC283112 | AK096599     | uncharacterized LOC283112                                       | -3.0908506 down | -2.2130513 down |
| HSD52     |              | uncharacterized LOC729467                                       | -4.1009865 down | -2.3608165 down |
| TMEM229B  | XR_245666    | transmembrane protein 229B                                      | -2.950043 down  | -2.2172356 down |
| TRIM49D1  | NM_001206627 | tripartite motif containing 49D1                                | -6.2758837 down | -4.8642063 down |
| LOC729444 | NR_038388    | uncharacterized LOC729444                                       | -2.953629 down  | -2.3946958 down |
| AKAP14    | NM_001008535 | A kinase (PRKA) anchor protein 14                               | -9.706893 down  | -3.7234235 down |
| PPP6R1    | NM_014931    | protein phosphatase 6, regulatory subunit 1                     | -2.7125459 down | -3.7880533 down |
| LRCOL1    | NM_001195520 | leucine rich colipase-like 1                                    | -7.937017 down  | -2.3316307 down |
| LRRC2     | NM_024512    | leucine rich repeat containing 2                                | -8.663694 down  | -4.936049 down  |
|           | XR_253722    |                                                                 | -5.3861666 down | -4.1076794 down |
| ABCC6     | NM_001079528 | ATP-binding cassette, sub-family C (CFTR/MRP), member 6         | -4.704009 down  | -2.3465993 down |
| COL23A1   | NM_173465    | collagen, type XXIII, alpha 1                                   | -2.6393318 down | -2.4980407 down |
| DSCR10    | NR_027695    | Down syndrome critical region gene 10 (non-protein coding)      | -2.3509786 down | -4.523501 down  |
| ARNT2     | NM_014862    | aryl-hydrocarbon receptor nuclear translocator 2                | -2.1457686 down | -3.672476 down  |
| WNT9A     | NM_003395    | wingless-type MMTV integration site family, member 9A           | -4.6638374 down | -2.4781842 down |
| CALY      | XM_005252686 | calcyon neuron-specific vesicular protein                       | -2.646121 down  | -3.2764416 down |
| TAS2R60   | NM_177437    | taste receptor, type 2, member 60                               | -3.5869987 down | -7.17155 down   |
|           | AK091409     |                                                                 | -3.8394096 down | -2.1723459 down |
| CSPG4P8   | NR_033579    | chondroitin sulfate proteoglycan 4 pseudogene 8                 | -2.690664 down  | -4.108693 down  |
| FLJ34223  |              | uncharacterized LOC440479                                       | -2.80412 down   | -3.636388 down  |
|           |              |                                                                 | -3.1214278 down | -2.0357 down    |
| NXPH3     | NM_007225    | neurexophilin 3                                                 | -7.387283 down  | -5.9469247 down |
| FOSL1     | NM_005438    | FOS-like antigen 1                                              | -3.677499 down  | -2.878679 down  |
| ODAM      | NM_017855    | odontogenic, ameloblast associated                              | -5.745308 down  | -2.316448 down  |
| RPA4      | NM_013347    | replication protein A4, 30kDa                                   | -6.4615455 down | -5.7699113 down |
|           | XR_249135    |                                                                 | -2.4342716 down | -2.6885736 down |
| LOC151475 |              | uncharacterized LOC151475                                       | -4.511114 down  | -2.0918717 down |
| BEND4     | NM_207406    | BEN domain containing 4                                         | -5.315073 down  | -2.7898242 down |
|           | M15530       |                                                                 | -7.6152816 down | -3.8116748 down |
| B4GALNT1  | NM_001478    | beta-1,4-N-acetyl-galactosaminyl transferase 1                  | -6.0181375 down | -4.1517744 down |
| LOC729159 | NM_001282301 | UPF0607 protein ENSP00000381418-like                            | -3.909766 down  | -2.6409407 down |
| INTU      | NM_015693    | inturned planar cell polarity protein                           | -2.1973627 down | -2.0360618 down |
| GPT       | NM_005309    | glutamic-pyruvate transaminase (alanine aminotransferase)       | -17.095665 down | -12.025615 down |
| POF1B     | NM_024921    | premature ovarian failure, 1B                                   | -4.3078823 down | -3.9651456 down |
| LOC441728 | XR_109175    | golgin-like                                                     | -10.269858 down | -11.882804 down |
| FGF22     | NM_020637    | fibroblast growth factor 22                                     | -3.7246077 down | -2.0708148 down |
| HEATR4    | NM_203309    | HEAT repeat containing 4                                        | -3.8288264 down | -2.7644792 down |
| OR10R3P   | AK122667     | olfactory receptor, family 10, subfamily R, member 3 pseudogene | -4.039973 down  | -2.766414 down  |
| OR2M7     | NM_001004691 | olfactory receptor, family 2, subfamily M, member 7             | -4.7752323 down | -3.0194101 down |
| EMX1      | BC037242     | empty spiracles homeobox 1                                      | -2.2458196 down | -2.7129996 down |
| MST1L     | NM_001271733 | macrophage stimulating 1-like                                   | -5.965646 down  | -3.6798 down    |
| RGMA      | NM_020211    | repulsive guidance molecule family member a                     | -2.3790376 down | -2.797557 down  |
| LHX1      | NM_005568    | LIM homeobox 1                                                  | -11.5837 down   | -16.453512 down |
|           |              |                                                                 | -10.089806 down | -3.8611047 down |
| CSDC2     | NM_014460    | cold shock domain containing C2, RNA binding                    | -3.5730286 down | -2.2499437 down |
| GMNC      | NM_001146686 | geminin coiled-coil domain containing                           | -3.3997037 down | -2.2894156 down |
| LINC00941 |              | long intergenic non-protein coding RNA 941                      | -4.341432 down  | -2.8990226 down |
| GNN       | NR_027249    | Grp94 neighboring nucleotidase pseudogene                       | -4.8369975 down | -3.0765047 down |
|           | AK130724     |                                                                 | -3.016074 down  | -3.0144577 down |
| ZSCAN30   | AK131291     | zinc finger and SCAN domain containing 30                       | -2.652367 down  | -2.432667 down  |

|           |              |                                                                      |            |      |            |      |
|-----------|--------------|----------------------------------------------------------------------|------------|------|------------|------|
|           | AK130932     |                                                                      | -3.6162224 | down | -2.50488   | down |
|           | DA666023     |                                                                      | -3.3337607 | down | -5.5206895 | down |
| PAX8      | NM_003466    | paired box 8                                                         | -6.5135703 | down | -2.3970957 | down |
| IGFN1     | NM_001164586 | immunoglobulin-like and fibronectin type III domain containing 1     | -3.8319924 | down | -2.936139  | down |
| SNORA60   | BF304636     | small nucleolar RNA, H/ACA box 60                                    | -14.885139 | down | -24.101852 | down |
| TAB3      | AL832071     | TGF-beta activated kinase 1/MAP3K7 binding protein 3                 | -3.1210954 | down | -2.0841086 | down |
| DNAI1     | NM_012144    | dynein, axonemal, intermediate chain 1                               | -5.2658434 | down | -2.885911  | down |
| DMTF1     | NR_024549    | cyclin D binding myb-like transcription factor 1                     | -2.2022564 | down | -2.3297913 | down |
| OR2T6     | NM_001005471 | olfactory receptor, family 2, subfamily T, member 6                  | -5.5887094 | down | -2.9359596 | down |
|           |              |                                                                      | -2.3561962 | down | -2.2367468 | down |
| PPIEL     | AK093659     | peptidylprolyl isomerase E-like pseudogene                           | -2.6236956 | down | -2.3107414 | down |
| EYA2      | NM_005244    | eyes absent homolog 2 (Drosophila)                                   | -4.438241  | down | -3.1323988 | down |
| APOA1     | NM_000039    | apolipoprotein A-I                                                   | -3.2232969 | down | -2.555198  | down |
| RNU105B   | NR_004386    | RNA, U105B small nucleolar                                           | -2.6134226 | down | -2.052073  | down |
| GOLGA8A   | NM_181077    | golgin A8 family, member A                                           | -2.3954964 | down | -3.1745539 | down |
|           |              |                                                                      | -4.5105433 | down | -2.0300515 | down |
| GOLT1A    | NM_198447    | golgi transport 1A                                                   | -2.2132843 | down | -2.2550058 | down |
| LOC402160 |              | uncharacterized LOC402160                                            | -5.117429  | down | -2.94199   | down |
| ZBTB8B    | NM_001145720 | zinc finger and BTB domain containing 8B                             | -3.9387116 | down | -2.5661407 | down |
| MAGI2     | NM_012301    | membrane associated guanylate kinase, WW and PDZ domain containing 2 | -3.9937086 | down | -2.0878015 | down |
| MIR17HG   | NR_027350    | miR-17-92 cluster host gene (non-protein coding)                     | -5.763578  | down | -4.278801  | down |
| FAM166A   | XM_005266087 | family with sequence similarity 166, member A                        | -5.8831716 | down | -3.26692   | down |
| NLRP7     | NM_139176    | NLR family, pyrin domain containing 7                                | -2.160418  | down | -2.6873498 | down |
| C1orf61   | XM_005244829 | chromosome 1 open reading frame 61                                   | -5.2116704 | down | -4.1522026 | down |
| ARHGAP23  | NM_001199417 | Rho GTPase activating protein 23                                     | -3.52002   | down | -2.0313954 | down |
| CDHR3     | NM_152750    | cadherin-related family member 3                                     | -5.453435  | down | -2.9512844 | down |
| OR1J1     | NM_001004451 | olfactory receptor, family 1, subfamily J, member 1                  | -4.8351145 | down | -2.8675408 | down |
| PSG11     | NM_002785    | pregnancy specific beta-1-glycoprotein 11                            | -2.7547078 | down | -2.0961835 | down |
| RREB1     | NM_001003699 | ras responsive element binding protein 1                             | -2.8816469 | down | -2.9915798 | down |
|           |              |                                                                      | -3.475632  | down | -4.0586104 | down |
|           |              |                                                                      | -2.9290357 | down | -3.7115092 | down |
| MACROD2   | BC035876     | MACRO domain containing 2                                            | -2.7689078 | down | -3.7093298 | down |
| LOC442132 |              | golgin A6 family-like 1 pseudogene                                   | -3.2626016 | down | -2.6582966 | down |
|           |              |                                                                      | -3.6953633 | down | -4.7340984 | down |
| PITX2     | NM_153426    | paired-like homeodomain 2                                            | -4.612477  | down | -3.0472758 | down |
|           |              |                                                                      | -5.3786416 | down | -3.4793699 | down |
|           |              |                                                                      | -7.823745  | down | -4.4878373 | down |
| LHX9      | NM_020204    | LIM homeobox 9                                                       | -4.391915  | down | -3.2342193 | down |
| GPR179    | NM_001004334 | G protein-coupled receptor 179                                       | -8.6036825 | down | -3.5796883 | down |
| TPH2      | NM_173353    | tryptophan hydroxylase 2                                             | -11.120205 | down | -7.6923847 | down |
| MAPK15    | NM_139021    | mitogen-activated protein kinase 15                                  | -2.143195  | down | -2.5821118 | down |
| MOB3B     | NM_024761    | MOB kinase activator 3B                                              | -2.8915176 | down | -3.4244726 | down |
| GPR98     | NM_032119    | G protein-coupled receptor 98                                        | -6.1065216 | down | -4.3317847 | down |
| AQP4      | NM_001650    | aquaporin 4                                                          | -5.1011415 | down | -3.0286992 | down |
| MPL       | NM_005373    | myeloproliferative leukemia virus oncogene                           | -3.005372  | down | -2.378023  | down |
| FBLN1     | NM_001996    | fibulin 1                                                            | -5.5976233 | down | -6.499015  | down |
|           |              |                                                                      | -3.9432645 | down | -2.2055886 | down |
| PPP1R27   | NM_001007533 | protein phosphatase 1, regulatory subunit 27                         | -5.734787  | down | -5.269405  | down |
|           |              |                                                                      | -4.3869987 | down | -2.184193  | down |
| LOC286442 |              | uncharacterized LOC286442                                            | -4.339916  | down | -2.328914  | down |
| SPEN      | NM_015001    | spen family transcriptional repressor                                | -8.814157  | down | -5.6074247 | down |
|           |              |                                                                      | -6.3649473 | down | -2.3358502 | down |
| SPATA31A3 | NM_001083124 | SPATA31 subfamily A, member 3                                        | -6.6184096 | down | -3.3604574 | down |
| OR4C6     | NM_001004704 | olfactory receptor, family 4, subfamily C, member 6                  | -19.2936   | down | -11.45397  | down |
| CDRT1     | NM_001282540 | CMT1A duplicated region transcript 1                                 | -6.194238  | down | -4.3554344 | down |
|           |              |                                                                      | -2.4670947 | down | -4.1436296 | down |
| CACNA1B   | NM_000718    | calcium channel, voltage-dependent, N type, alpha 1B subunit         | -4.147942  | down | -4.9678426 | down |
| RNASE12   | NM_001024822 | ribonuclease, RNase A family, 12 (non-active)                        | -4.9715176 | down | -2.7973037 | down |
| APC       | NM_001127511 | adenomatous polyposis coli                                           | -2.448398  | down | -2.182364  | down |
|           |              |                                                                      | -4.7872157 | down | -4.1678476 | down |
| SPON2     | AK124606     | spondin 2, extracellular matrix protein                              | -3.202906  | down | -2.3445394 | down |

|              |              |                                                                     |                 |                 |
|--------------|--------------|---------------------------------------------------------------------|-----------------|-----------------|
|              |              |                                                                     | -5.53947 down   | -3.3159459 down |
|              | BC046635     |                                                                     | -4.5571737 down | -3.8089678 down |
| RGS8         | NM_033345    | regulator of G-protein signaling 8                                  | -5.530544 down  | -2.525994 down  |
|              | XR_248969    |                                                                     | -4.0392647 down | -2.3164892 down |
|              | BC015677     |                                                                     | -5.105051 down  | -2.8813436 down |
| RAP1GAP      | NM_002885    | RAP1 GTPase activating protein                                      | -2.9104455 down | -3.1807668 down |
| LOC100130539 | NM_001258000 | uncharacterized LOC100130539                                        | -2.5246282 down | -2.0935957 down |
|              |              |                                                                     | -4.4528317 down | -2.2228973 down |
| KCNJ14       | NM_013348    | potassium inwardly-rectifying channel, subfamily J, member 14       | -2.850899 down  | -2.4246068 down |
| ENTPD1       | NM_001776    | ectonucleoside triphosphate diphosphohydrolase 1                    | -2.5639234 down | -2.13871 down   |
| LOC286177    | NR_038874    | uncharacterized LOC286177                                           | -3.6278076 down | -2.1548452 down |
|              |              |                                                                     | -2.3879719 down | -2.7265215 down |
| FSHR         | NM_000145    | follicle stimulating hormone receptor                               | -3.3127756 down | -2.267113 down  |
| GPM6B        | NM_001001995 | glycoprotein M6B                                                    | -3.0634086 down | -2.3533 down    |
| ARHGAP23     | NM_001199417 | Rho GTPase activating protein 23                                    | -4.858368 down  | -3.3287895 down |
|              |              |                                                                     | -4.8783894 down | -3.0666175 down |
|              |              |                                                                     | -5.2587976 down | -3.3255405 down |
| PGM5         | NM_021965    | phosphoglucosyltransferase 5                                        | -2.2973363 down | -2.2664988 down |
| KRT19P2      | NR_036685    | keratin 19 pseudogene 2                                             | -3.348448 down  | -2.1444669 down |
| KAAG1        | NM_181337    | kidney associated antigen 1                                         | -4.3520412 down | -2.9201388 down |
| FBXL7        | NM_012304    | F-box and leucine-rich repeat protein 7                             | -5.4775863 down | -2.2919905 down |
| LINC00910    |              | long intergenic non-protein coding RNA 910                          | -7.4299035 down | -2.4430544 down |
| ULBP2        | NM_025217    | UL16 binding protein 2                                              | -6.8728576 down | -3.1869807 down |
| SERPINA4     | NM_006215    | serpin peptidase inhibitor, clade A (alpha-1 antitrypsin), member 4 | -3.1868882 down | -3.599843 down  |
| ELK1         | NM_001257168 | ELK1, member of ETS oncogene family                                 | -8.585914 down  | -8.91259 down   |
| ANKRD20A8P   | NR_003366    | ankyrin repeat domain 20 family, member A8, pseudogene              | -6.176295 down  | -4.33573 down   |
| TMEM178B     |              | transmembrane protein 178B                                          | -3.5479217 down | -2.201137 down  |
| PIP5K1A      | NM_003557    | phosphatidylinositol-4-phosphate 5-kinase, type I, alpha            | -3.5278819 down | -4.3902464 down |
| SPTBN4       | NM_020971    | spectrin, beta, non-erythrocytic 4                                  | -3.0292487 down | -3.9215827 down |
|              |              |                                                                     | -5.932906 down  | -3.4587607 down |
| DCD          | NM_053283    | dermcidin                                                           | -3.9843438 down | -2.4074175 down |
| HHIP         | NM_022475    | hedgehog interacting protein                                        | -2.439893 down  | -3.1273031 down |
| SHC3         | NM_016848    | SHC (Src homology 2 domain containing) transforming protein 3       | -2.7798693 down | -2.0452006 down |
| CCDC108      | NM_152389    | coiled-coil domain containing 108                                   | -3.7554383 down | -2.321727 down  |
| LOC283731    | BC050067     | uncharacterized LOC283731                                           | -5.6335015 down | -3.443976 down  |
| TSGA10       | NM_025244    | testis specific, 10                                                 | -4.2336516 down | -2.2358823 down |
| FAM230C      | NR_027278    | family with sequence similarity 230, member C                       | -6.3683257 down | -3.6202443 down |
| EXTL1        | NM_004455    | exostosin-like glycosyltransferase 1                                | -2.0882576 down | -4.033939 down  |
| SOX3         | NM_005634    | SRY (sex determining region Y)-box 3                                | -7.3945627 down | -3.300588 down  |
| PHLDB3       | AK097512     | pleckstrin homology-like domain, family B, member 3                 | -3.8866968 down | -2.2092724 down |
|              |              |                                                                     | -3.2939706 down | -3.443294 down  |
| USH1C        | NM_005709    | Usher syndrome 1C (autosomal recessive, severe)                     | -5.6109343 down | -2.880904 down  |
|              | XR_171112    |                                                                     | -4.5336623 down | -2.611336 down  |
|              | AK123118     |                                                                     | -5.9080386 down | -6.6710963 down |
| ZNF331       |              | zinc finger protein 331                                             | -5.116043 down  | -3.0107036 down |
| LRRC3        | NM_030891    | leucine rich repeat containing 3                                    | -5.487424 down  | -2.853224 down  |
| PDGFRA       | NM_006206    | platelet-derived growth factor receptor, alpha polypeptide          | -2.4526863 down | -2.2322545 down |
| DPF3         | AK024141     | D4, zinc and double PHD fingers, family 3                           | -2.124125 down  | -2.080736 down  |
| FAM27A       | NR_024060    | family with sequence similarity 27, member A                        | -3.115372 down  | -4.4144225 down |
|              |              |                                                                     | -2.6201854 down | -2.9267063 down |
|              |              |                                                                     | -2.047749 down  | -2.0754888 down |
|              | BC041650     |                                                                     | -4.693455 down  | -3.5388305 down |
| PRAMEF22     | NM_001100631 | PRAME family member 22                                              | -3.2595613 down | -2.1726177 down |
| NFASC        | NM_001005388 | neurofascin                                                         | -5.391501 down  | -6.7971063 down |
| LOC101927910 | XM_005256332 | keratin-associated protein 5-5-like                                 | -2.2112243 down | -2.005248 down  |
|              |              |                                                                     | -5.157066 down  | -2.634412 down  |
|              |              |                                                                     | -3.0468583 down | -2.4412186 down |
|              | AK123308     |                                                                     | -3.7871592 down | -2.1073499 down |
|              |              |                                                                     | -3.4931276 down | -2.2421494 down |
|              | CU678159     |                                                                     | -4.846243 down  | -3.3637216 down |

|              |              |                                                                                                 |                 |                 |
|--------------|--------------|-------------------------------------------------------------------------------------------------|-----------------|-----------------|
| LOC441204    |              | uncharacterized LOC441204                                                                       | -5.868776 down  | -3.853323 down  |
| ABC89        | NM_019625    | ATP-binding cassette, sub-family B (MDR/TAP), member 9                                          | -3.5484471 down | -2.612492 down  |
| EML5         | NM_183387    | echinoderm microtubule associated protein like 5                                                | -4.5585327 down | -9.253154 down  |
| LOC200726    | NM_001102659 | hCG1657980                                                                                      | -6.687719 down  | -5.9616265 down |
|              |              |                                                                                                 | -3.3375595 down | -2.2873392 down |
| BSX          | NM_001098169 | brain-specific homeobox                                                                         | -6.2262125 down | -2.4991012 down |
|              |              |                                                                                                 | -2.0069022 down | -3.1697426 down |
| CASKIN1      | NM_020764    | CASK interacting protein 1                                                                      | -2.8927066 down | -2.277006 down  |
| DGCR5        |              | DiGeorge syndrome critical region gene 5 (non-protein coding)                                   | -4.28018 down   | -2.143334 down  |
| NEUROG1      | NM_006161    | neurogenin 1                                                                                    | -5.3619804 down | -3.1397324 down |
| KIRREL3-AS3  | NR_040078    | KIRREL3 antisense RNA 3                                                                         | -3.6323845 down | -5.0667768 down |
| NR2F2-AS1    | XR_248180    | NR2F2 antisense RNA 1                                                                           | -3.7656596 down | -2.6659617 down |
| DLK1         | NM_003836    | delta-like 1 homolog (Drosophila)                                                               | -3.1148267 down | -2.7227533 down |
| RAPH1        | NM_213589    | Ras association (RalGDS/AF-6) and pleckstrin homology domains 1                                 | -3.9197226 down | -2.3589814 down |
| PHLDA3       | NM_012396    | pleckstrin homology-like domain, family A, member 3                                             | -3.2136095 down | -2.6204505 down |
| CIITA        | NM_001286403 | class II, major histocompatibility complex, transactivator                                      | -5.077524 down  | -2.8290663 down |
|              |              |                                                                                                 | -5.3983345 down | -4.9868937 down |
|              | XM_005245645 |                                                                                                 | -3.9965096 down | -3.0538406 down |
| PAX5         | NM_016734    | paired box 5                                                                                    | -4.005408 down  | -2.3719497 down |
| LOC116437    | NR_026670    | uncharacterized LOC116437                                                                       | -5.4227715 down | -4.1206765 down |
| GLRA1        | NM_000171    | glycine receptor, alpha 1                                                                       | -4.4588695 down | -2.484067 down  |
| RNU105C      | NR_004385    | RNA, U105C small nucleolar                                                                      | -11.19681 down  | -7.9807844 down |
| KIF6         | NM_145027    | kinesin family member 6                                                                         | -3.9143476 down | -2.2739236 down |
| AZGP1        | NM_001185    | alpha-2-glycoprotein 1, zinc-binding                                                            | -9.540843 down  | -2.3737552 down |
| IKZF2        | NM_001079526 | IKAROS family zinc finger 2 (Helios)                                                            | -2.601485 down  | -2.5392673 down |
|              |              |                                                                                                 | -5.3467007 down | -3.2232668 down |
|              |              |                                                                                                 | -4.261249 down  | -2.107883 down  |
| C1orf95      | NM_001003665 | chromosome 1 open reading frame 95                                                              | -5.0441523 down | -2.5306077 down |
| CHEK2        | NM_145862    | checkpoint kinase 2                                                                             | -2.3252156 down | -2.01323 down   |
|              |              |                                                                                                 | -2.1989734 down | -3.9305325 down |
| SCN8A        | NM_014191    | sodium channel, voltage gated, type VIII, alpha subunit                                         | -4.553953 down  | -2.4663725 down |
| LINC00452    | XR_246655    | long intergenic non-protein coding RNA 452                                                      | -3.9686918 down | -2.4761572 down |
| PTCHD4       | NM_001013732 | patched domain containing 4                                                                     | -4.50329 down   | -2.5933256 down |
|              | AF130075     |                                                                                                 | -7.4900355 down | -4.5568705 down |
| PDE4DIP      | NM_001198832 | phosphodiesterase 4D interacting protein                                                        | -3.7096884 down | -5.6383185 down |
| LOC401188    | AK091013     | uncharacterized LOC401188                                                                       | -4.323573 down  | -2.4214504 down |
| GOLGA6L4     | NM_001267536 | golgin A6 family-like 4                                                                         | -11.619715 down | -7.4029164 down |
| CEP55        | NM_018131    | centrosomal protein 55kDa                                                                       | -3.6055336 down | -2.0650635 down |
| SH3GL1P2     | NR_033420    | SH3-domain GRB2-like 1 pseudogene 2                                                             | -2.1710477 down | -4.760231 down  |
| MYO18B       | NM_032608    | myosin XVIIIIB                                                                                  | -2.7982197 down | -2.263577 down  |
| SLC25A30-AS1 | XR_172004    | SLC25A30 antisense RNA 1                                                                        | -5.4230833 down | -2.3404934 down |
|              |              |                                                                                                 | -4.927114 down  | -3.1189828 down |
| AACSP1       |              | acetoacetyl-CoA synthetase pseudogene 1                                                         | -6.807344 down  | -8.845006 down  |
|              |              |                                                                                                 | -3.1793828 down | -2.2812047 down |
| POM121L9P    | NR_003714    | POM121 transmembrane nucleoporin-like 9, pseudogene                                             | -4.6989236 down | -3.0508938 down |
| FLJ16779     | NR_024389    | uncharacterized LOC100192386                                                                    | -2.6983058 down | -2.0264542 down |
| GALNT5       | NM_014568    | UDP-N-acetyl-alpha-D-galactosamine:polypeptide N-acetyl-galactosaminyltransferase 5 (GalNAc-T5) | -3.7609816 down | -3.2798953 down |
| ANKRD20A3    | XM_005276027 | ankyrin repeat domain 20 family, member A3                                                      | -7.36758 down   | -5.3436694 down |
|              | XR_112948    |                                                                                                 | -5.93326 down   | -4.5668626 down |
|              |              |                                                                                                 | -5.271536 down  | -2.1753078 down |
| MPP3         | NM_001932    | membrane protein, palmitoylated 3 (MAGUK p55 subfamily member 3)                                | -3.6993234 down | -3.2927377 down |
| SLC38A8      | NM_001080442 | solute carrier family 38, member 8                                                              | -4.513118 down  | -2.4864526 down |
| MYADML2      | NM_001145113 | myeloid-associated differentiation marker-like 2                                                | -4.480282 down  | -2.3721561 down |
|              | AF068294     |                                                                                                 | -4.001837 down  | -3.0097098 down |
| RUNX1        | NM_001122607 | runt-related transcription factor 1                                                             | -3.6770244 down | -4.8424187 down |
|              |              |                                                                                                 | -5.349376 down  | -3.8398585 down |
| GLB1L3       | NM_001080407 | galactosidase, beta 1-like 3                                                                    | -2.864664 down  | -2.0269883 down |
| LOC143286    | AL049428     | uncharacterized LOC143286                                                                       | -5.528928 down  | -3.7336493 down |
|              | AF495723     |                                                                                                 | -7.263195 down  | -3.4110782 down |

|              |              |                                                                           |                 |                 |
|--------------|--------------|---------------------------------------------------------------------------|-----------------|-----------------|
|              | BC039440     |                                                                           | -6.5707564 down | -4.5986185 down |
| LINC00111    |              | long intergenic non-protein coding RNA 111                                | -9.909001 down  | -6.9616804 down |
| SLC25A53     | NM_001012755 | solute carrier family 25, member 53                                       | -2.7965713 down | -2.0241315 down |
| BSPRY        | NM_017688    | B-box and SPRY domain containing                                          | -2.0788772 down | -2.912585 down  |
| NFATC2       | NM_173091    | nuclear factor of activated T-cells, cytoplasmic, calcineurin-dependent 2 | -2.7129464 down | -3.1096048 down |
|              | AF116680     |                                                                           | -4.3722887 down | -3.4316304 down |
| MGC15705     | BC007304     | uncharacterized protein MGC15705                                          | -2.6516984 down | -2.3447604 down |
| DAZ1         | NM_004081    | deleted in azoospermia 1                                                  | -4.2207193 down | -2.696044 down  |
| BAALC        |              | brain and acute leukemia, cytoplasmic                                     | -3.9340394 down | -2.5718036 down |
| XLOC_014512  |              |                                                                           | -4.6114936 down | -2.9526112 down |
|              |              |                                                                           | -3.5228634 down | -2.9310122 down |
|              |              |                                                                           | -2.2054574 down | -3.3041184 down |
|              |              |                                                                           | -3.3535411 down | -2.9740458 down |
| LOC100130278 | AK094114     | uncharacterized LOC100130278                                              | -4.352934 down  | -2.6810272 down |
| MYLK3        | NM_182493    | myosin light chain kinase 3                                               | -4.8094454 down | -2.6045861 down |
| ZEB1-AS1     | CD674797     | ZEB1 antisense RNA 1                                                      | -2.5606425 down | -2.2103498 down |
| KCNH6        | NM_173092    | potassium voltage-gated channel, subfamily H (eag-related), member 6      | -7.2367606 down | -3.789919 down  |
| C7orf31      | NM_138811    | chromosome 7 open reading frame 31                                        | -3.9815376 down | -2.5165324 down |
| ASB15        | NM_080928    | ankyrin repeat and SOCS box containing 15                                 | -4.1943336 down | -2.018217 down  |
| LOC100128501 | AK092192     | uncharacterized LOC100128501                                              | -2.1971228 down | -2.9409704 down |
| TWIST2       | NM_001271893 | twist family bHLH transcription factor 2                                  | -2.498709 down  | -2.13133 down   |
| CHN2         | XM_005249602 | chimerin 2                                                                | -3.31459 down   | -2.1265008 down |
| OPRL1        | NM_182647    | opiate receptor-like 1                                                    | -2.5215628 down | -3.7429655 down |
|              |              |                                                                           | -4.053519 down  | -2.713801 down  |
| FAM83F       | NM_138435    | family with sequence similarity 83, member F                              | -2.1103554 down | -2.2759414 down |
| LOC100129148 | NR_033999    | uncharacterized LOC100129148                                              | -6.381669 down  | -3.8475778 down |
| VPS37D       | NM_001077621 | vacuolar protein sorting 37 homolog D (S. cerevisiae)                     | -2.9814596 down | -2.6878357 down |
| ZC3H12D      | NM_207360    | zinc finger CCCH-type containing 12D                                      | -5.7907715 down | -6.3925047 down |
| GPR133       | NM_198827    | G protein-coupled receptor 133                                            | -4.3677216 down | -3.547708 down  |
|              |              |                                                                           | -5.0685506 down | -2.664155 down  |
| NCAPG        | NM_022346    | non-SMC condensin I complex, subunit G                                    | -4.2137847 down | -2.4537015 down |
| NTNG2        | AY358165     | netrin G2                                                                 | -7.3633924 down | -6.8432245 down |
| TTC40        | NM_001200049 | tetratricopeptide repeat domain 40                                        | -2.0136626 down | -2.4544106 down |
| AMER2        | NM_152704    | APC membrane recruitment protein 2                                        | -3.7883055 down | -2.0918944 down |
| ADRA1B       | NM_000679    | adrenoceptor alpha 1B                                                     | -2.41941 down   | -2.8089519 down |
| GJD4         | BC035898     | gap junction protein, delta 4, 40.1kDa                                    | -4.75909 down   | -6.991357 down  |
| C22orf42     | NM_001010859 | chromosome 22 open reading frame 42                                       | -4.2366695 down | -3.8820403 down |
| LOC100128105 |              | uncharacterized LOC100128105                                              | -5.372041 down  | -2.01934 down   |
| RUFY4        | NM_198483    | RUN and FYVE domain containing 4                                          | -2.5532694 down | -3.057439 down  |
| LOC285300    |              | uncharacterized LOC285300                                                 | -4.2367067 down | -3.0888019 down |
| TSG1         | NR_015362    | tumor suppressor TSG1                                                     | -4.174873 down  | -2.380016 down  |
|              |              |                                                                           | -4.5816817 down | -4.532669 down  |
|              |              |                                                                           | -2.6276996 down | -2.3408945 down |
|              | AF130091     |                                                                           | -2.744198 down  | -2.0109074 down |
| REG3A        | NM_138938    | regenerating islet-derived 3 alpha                                        | -3.5031226 down | -2.559145 down  |
| NPLOC4       | AB040932     | nuclear protein localization 4 homolog (S. cerevisiae)                    | -3.555991 down  | -2.1306121 down |
| ONECUT3      | NM_001080488 | one cut homeobox 3                                                        | -3.2645967 down | -3.3143384 down |
| PRSS8        | NM_002773    | protease, serine, 8                                                       | -6.2877145 down | -4.0148997 down |
| C17orf105    | NM_001136483 | chromosome 17 open reading frame 105                                      | -3.658769 down  | -2.9773674 down |
| LYZL1        | NM_032517    | lysozyme-like 1                                                           | -6.901953 down  | -4.044266 down  |
|              | AB305689     |                                                                           | -2.1255066 down | -2.2967505 down |
| ZNF682       | NM_033196    | zinc finger protein 682                                                   | -5.54705 down   | -3.902928 down  |
| TTLL6        | NM_173623    | tubulin tyrosine ligase-like family, member 6                             | -3.27067 down   | -3.057029 down  |
|              | AK124325     |                                                                           | -4.2009473 down | -2.5298648 down |
| C2orf53      | NM_178553    | chromosome 2 open reading frame 53                                        | -2.501564 down  | -2.0435889 down |
| TSPY26P      | NR_002781    | testis specific protein, Y-linked 26, pseudogene                          | -3.6118186 down | -2.7128167 down |
|              |              |                                                                           | -2.5757632 down | -2.9023128 down |
| POTEB        | NM_207355    | POTE ankyrin domain family, member B                                      | -5.3219733 down | -4.1299067 down |
| LARP4B       | NM_015155    | La ribonucleoprotein domain family, member 4B                             | -3.7670898 down | -2.2183692 down |
| PROX2        | NM_001243007 | prospero homeobox 2                                                       | -5.8180184 down | -5.0145664 down |
|              | AF390550     |                                                                           | -3.377641 down  | -2.703168 down  |
| FAM188B      | AK090826     | family with sequence similarity 188, member B                             | -3.2656837 down | -2.0660553 down |

|              |              |                                                                      |                 |                 |
|--------------|--------------|----------------------------------------------------------------------|-----------------|-----------------|
| LINC00548    |              | long intergenic non-protein coding RNA 548                           | -3.4382236 down | -2.267029 down  |
| HMGB3P1      | NR_002165    | high mobility group box 3 pseudogene 1                               | -3.4374135 down | -3.4973514 down |
| SPC24        | AK075287     | SPC24, NDC80 kinetochore complex component                           | -4.6533856 down | -2.3197775 down |
| MEGF11       | NM_032445    | multiple EGF-like-domains 11                                         | -2.6790116 down | -4.04248 down   |
| ZP4          | NM_021186    | zona pellucida glycoprotein 4                                        | -5.587552 down  | -2.7163396 down |
| MAT1A        | NM_000429    | methionine adenosyltransferase I, alpha                              | -3.8006558 down | -3.4326124 down |
| SH2D4B       | NM_207372    | SH2 domain containing 4B                                             | -3.73974 down   | -3.135691 down  |
| GH1          | NM_000515    | growth hormone 1                                                     | -2.8961325 down | -2.542353 down  |
| ERO1LB       |              | ERO1-like beta (S. cerevisiae)                                       | -3.8247004 down | -2.0460145 down |
| CYCSP52      | NR_001560    | cytochrome c, somatic pseudogene 52                                  | -5.9181232 down | -2.7928193 down |
|              |              |                                                                      | -4.169155 down  | -3.0524366 down |
| LOC729739    | BC013681     | peptidylprolyl isomerase A (cyclophilin A) pseudogene                | -5.952292 down  | -3.0480518 down |
| ARHGEF4      | NM_015320    | Rho guanine nucleotide exchange factor (GEF) 4                       | -2.9063163 down | -2.0614185 down |
| MAGEC1       | NM_005462    | melanoma antigen family C, 1                                         | -5.0645366 down | -3.344572 down  |
|              |              |                                                                      | -2.954408 down  | -3.5126047 down |
| LOC100130372 | AK127532     | uncharacterized LOC100130372                                         | -5.8386774 down | -2.0686522 down |
| LOC402779    | NR_038372    | uncharacterized LOC402779                                            | -2.578671 down  | -2.2035089 down |
| STAG2        | NM_001042751 | stromal antigen 2                                                    | -3.316222 down  | -2.3683817 down |
| CALCA        | NM_001033952 | calcitonin-related polypeptide alpha                                 | -2.9686708 down | -2.9556026 down |
| AATK         | XM_005257848 | apoptosis-associated tyrosine kinase                                 | -6.053745 down  | -3.704955 down  |
| S100A7A      | AY189119     | S100 calcium binding protein A7A                                     | -2.3899438 down | -3.0437043 down |
| TMEM99       | NM_001195386 | transmembrane protein 99                                             | -3.0904317 down | -2.2920058 down |
| SATB2        | NM_015265    | SATB homeobox 2                                                      | -3.6700046 down | -2.0754857 down |
|              |              |                                                                      | -4.7635064 down | -2.615217 down  |
| VSTM2L       | NM_080607    | V-set and transmembrane domain containing 2 like                     | -6.645723 down  | -6.580755 down  |
| LOC100128176 | NR_038408    | uncharacterized LOC100128176                                         | -4.1481166 down | -2.3471353 down |
| C4orf50      | XM_003118524 | chromosome 4 open reading frame 50                                   | -4.803954 down  | -3.3959832 down |
|              |              |                                                                      | -4.2472863 down | -3.8274066 down |
|              |              |                                                                      | -9.365239 down  | -8.7195015 down |
| MYH7B        | NM_020884    | myosin, heavy chain 7B, cardiac muscle, beta                         | -4.8613653 down | -2.909175 down  |
|              |              |                                                                      | -3.5452375 down | -3.4789088 down |
| TMEM132C     | NM_001136103 | transmembrane protein 132C                                           | -4.38772 down   | -2.8326926 down |
| GPC6         | NM_005708    | glypican 6                                                           | -5.3728676 down | -2.7232473 down |
| LOC100128950 | AK124198     | uncharacterized LOC100128950                                         | -5.8576503 down | -3.310135 down  |
|              |              |                                                                      | -7.9491067 down | -8.349956 down  |
| LOC729911    | NR_038997    | uncharacterized LOC729911                                            | -5.487533 down  | -3.3559012 down |
| C2orf16      | NM_032266    | chromosome 2 open reading frame 16                                   | -3.6598673 down | -7.9584894 down |
| STON2        | NM_033104    | stonin 2                                                             | -3.67418 down   | -2.5440195 down |
| CEP72        | NM_018140    | centrosomal protein 72kDa                                            | -2.8053527 down | -2.883138 down  |
| PLA2G2D      | BC025706     | phospholipase A2, group IID                                          | -5.292874 down  | -2.4678793 down |
| MAGEA11      | NM_001011544 | melanoma antigen family A, 11                                        | -4.0140657 down | -2.2949226 down |
|              | AJ276252     |                                                                      | -3.4094586 down | -2.196858 down  |
| TRPM3        | NM_206948    | transient receptor potential cation channel, subfamily M, member 3   | -3.452296 down  | -4.561398 down  |
| LOC100132356 | NR_034127    | uncharacterized LOC100132356                                         | -2.7319398 down | -2.5004866 down |
| HTRA3        | NM_053044    | Htra serine peptidase 3                                              | -3.8360732 down | -2.380205 down  |
|              |              |                                                                      | -6.7110906 down | -4.2568326 down |
| BTBD19       | NM_001136537 | BTB (POZ) domain containing 19                                       | -4.391678 down  | -3.4949558 down |
| XLOC_014512  |              |                                                                      | -3.4835758 down | -2.3657763 down |
| PRAMEF4      | NM_001009611 | PRAME family member 4                                                | -4.5565324 down | -5.2520337 down |
|              |              |                                                                      | -3.2805517 down | -2.0368047 down |
| FCER1G       |              | Fc fragment of IgE, high affinity I, receptor for; gamma polypeptide | -2.0793395 down | -2.0450554 down |
| OPRM1        | NM_001008504 | opioid receptor, mu 1                                                | -2.0698018 down | -2.3947942 down |
| FLJ13224     | NR_026806    | uncharacterized LOC79857                                             | -3.4342465 down | -2.504551 down  |
| UBE2I        | XM_005255542 | ubiquitin-conjugating enzyme E2I                                     | -3.2711504 down | -3.1578462 down |
| FLJ44674     | AK128747     | FLJ44674 protein                                                     | -4.437907 down  | -2.497909 down  |
| XLOC_014512  |              |                                                                      | -3.7397025 down | -2.2224689 down |
| OR52E2       | NM_001005164 | olfactory receptor, family 52, subfamily E, member 2                 | -11.298313 down | -12.850661 down |
|              | AK128779     |                                                                      | -4.7531257 down | -3.1691606 down |
|              |              |                                                                      | -6.413644 down  | -2.450457 down  |
| ANKRD30BL    | NR_027019    | ankyrin repeat domain 30B-like                                       | -4.696919 down  | -3.9171348 down |
| SND1-IT1     | NR_027330    | SND1 intronic transcript 1 (non-protein coding)                      | -2.7406774 down | -5.7121572 down |
| ZNF295-AS1   | NR_027273    | ZNF295 antisense RNA 1                                               | -5.074827 down  | -2.1244316 down |

|              |              |                                                                                       |                 |                 |
|--------------|--------------|---------------------------------------------------------------------------------------|-----------------|-----------------|
| LINC00908    |              | long intergenic non-protein coding RNA 908                                            | -3.0775535 down | -2.149846 down  |
| C9orf170     | NM_001001709 | chromosome 9 open reading frame 170                                                   | -4.1848717 down | -2.194299 down  |
| KRT18        | NM_000224    | keratin 18                                                                            | -2.6492693 down | -2.544059 down  |
| LOC100133077 | XR_110101    | uncharacterized LOC100133077                                                          | -5.1168437 down | -2.663046 down  |
| KRT24        | NM_019016    | keratin 24                                                                            | -5.66145 down   | -3.9864826 down |
| LOC101060578 | AK097639     | putative COBW domain-containing protein 7-like                                        | -2.5687132 down | -2.050406 down  |
|              |              |                                                                                       | -5.182995 down  | -3.2997575 down |
| LYPD1        | NM_144586    | LY6/PLAUR domain containing 1                                                         | -5.2903824 down | -3.1973336 down |
| LOC100131257 | NR_034022    | zinc finger protein 655 pseudogene                                                    | -2.8151958 down | -2.0795376 down |
| ZP3          | NM_007155    | zona pellucida glycoprotein 3 (sperm receptor)                                        | -2.2300262 down | -3.2205937 down |
| ELMOD3       | NM_001135021 | ELMO/CED-12 domain containing 3                                                       | -5.04395 down   | -6.2250795 down |
| BBOX1        | NM_003986    | butyrobetaine (gamma), 2-oxoglutarate dioxygenase (gamma-butyrobetaine hydroxylase) 1 | -3.7182384 down | -2.249721 down  |
|              |              |                                                                                       | -3.3010452 down | -3.4104838 down |
| NRIP2        | NM_031474    | nuclear receptor interacting protein 2                                                | -3.6821842 down | -3.1240985 down |
| PLEKHH3      | NM_024927    | pleckstrin homology domain containing, family H (with MyTH4 domain) member 3          | -3.8838005 down | -6.09917 down   |
| SPEG         | NM_005876    | SPEG complex locus                                                                    | -4.8856554 down | -4.6148615 down |
| ELOVL3       | NM_152310    | ELOVL fatty acid elongase 3                                                           | -4.179019 down  | -2.1939065 down |
| CYP11B1      | NM_000497    | cytochrome P450, family 11, subfamily B, polypeptide 1                                | -5.6661777 down | -4.0354156 down |
|              |              |                                                                                       | -5.2011156 down | -2.5169075 down |
|              |              |                                                                                       | -2.8676488 down | -2.4875305 down |
|              |              |                                                                                       | -3.9133577 down | -2.1222732 down |
| PRKCG        | NM_002739    | protein kinase C, gamma                                                               | -5.734045 down  | -2.5764086 down |
| NEU2         | NM_005383    | sialidase 2 (cytosolic sialidase)                                                     | -2.9798942 down | -2.152409 down  |
|              |              |                                                                                       | -3.2337716 down | -2.5985951 down |
| PSG1         | NM_006905    | pregnancy specific beta-1-glycoprotein 1                                              | -4.9921613 down | -2.1910615 down |
| XLOC_010534  |              |                                                                                       | -4.276244 down  | -3.053713 down  |
| LINC00302    | CU449054     | long intergenic non-protein coding RNA 302                                            | -3.6860738 down | -2.149412 down  |
| DKKL1        | NM_014419    | dickkopf-like 1                                                                       | -3.9595037 down | -2.145298 down  |
| ACACB        | NM_001093    | acetyl-CoA carboxylase beta                                                           | -2.8339155 down | -2.1251402 down |
| C1orf140     | NR_024236    | uncharacterized LOC400804                                                             | -3.5248063 down | -5.214493 down  |
| PPIAL4G      | AK123006     | peptidylprolyl isomerase A (cyclophilin A)-like 4G                                    | -4.986513 down  | -3.2630737 down |
| CLDN24       | NM_001185149 | claudin 24                                                                            | -3.2661986 down | -2.027146 down  |
| EFHC2        | NM_025184    | EF-hand domain (C-terminal) containing 2                                              | -2.5841026 down | -2.1857426 down |
| FLJ45256     | XR_172139    | uncharacterized LOC400511                                                             | -5.4824586 down | -3.1493418 down |
| NUMB         | AK055876     | numb homolog (Drosophila)                                                             | -5.916553 down  | -4.465653 down  |
| ESYT3        | NM_031913    | extended synaptotagmin-like protein 3                                                 | -3.2355413 down | -2.027996 down  |
| ANKRD1       | NM_014391    | ankyrin repeat domain 1 (cardiac muscle)                                              | -3.6157227 down | -2.058246 down  |
| LOC650157    | XM_001727011 | peptidyl-prolyl cis-trans isomerase A-like                                            | -2.1183245 down | -2.1015105 down |
| GJA8         | NM_005267    | gap junction protein, alpha 8, 50kDa                                                  | -2.6307201 down | -2.649914 down  |
|              |              |                                                                                       | -2.5484412 down | -2.8283353 down |
| OR5AS1       | NM_001001921 | olfactory receptor, family 5, subfamily AS, member 1                                  | -9.57515 down   | -6.8833327 down |
| FOXD2-AS1    | NR_026878    | FOXD2 antisense RNA 1 (head to head)                                                  | -2.1654174 down | -2.1788409 down |
| PRAMEF15     | NM_001098376 | PRAME family member 15                                                                | -5.546904 down  | -3.3328235 down |
|              | DA797466     |                                                                                       | -4.1117473 down | -3.3040235 down |
| EGFL6        | NM_001167890 | EGF-like-domain, multiple 6                                                           | -4.1612563 down | -2.9807382 down |
| KALRN        | AK131379     | kalirin, RhoGEF kinase                                                                | -8.337575 down  | -7.722789 down  |
| HSD17B2      | NM_002153    | hydroxysteroid (17-beta) dehydrogenase 2                                              | -2.771075 down  | -2.275334 down  |
| RS1          | NM_000330    | retinoschisin 1                                                                       | -5.631471 down  | -2.5032353 down |
| TTL13        | NR_104604    | tubulin tyrosine ligase-like family, member 13                                        | -4.3395324 down | -2.9083288 down |
| SERPING1     | NM_000062    | serpin peptidase inhibitor, clade G (C1 inhibitor), member 1                          | -3.6206262 down | -4.2205234 down |
| NXN          | BC104634     | nucleoredoxin                                                                         | -3.0354202 down | -2.1891823 down |
| C2orf27B     | NM_214461    | chromosome 2 open reading frame 27B                                                   | -6.6304526 down | -3.303043 down  |
| LOC284561    | XR_110828    | uncharacterized LOC284561                                                             | -4.8970804 down | -4.23857 down   |
| AOX1         | NM_001159    | aldehyde oxidase 1                                                                    | -2.7608504 down | -2.0797276 down |
| GPRIN1       | NM_052899    | G protein regulated inducer of neurite outgrowth 1                                    | -2.2356331 down | -2.8827758 down |
|              |              |                                                                                       | -5.0693965 down | -2.142824 down  |
|              | XM_001717040 |                                                                                       | -2.4956841 down | -2.1503267 down |
| KNCN         | NM_001097611 | kinocilin                                                                             | -4.165843 down  | -2.725823 down  |
| LOC100128682 | NR_040046    | uncharacterized LOC100128682                                                          | -5.0672064 down | -2.454104 down  |
| BTC          | NM_001729    | betacellulin                                                                          | -4.2291036 down | -2.8819747 down |
| MLNR         | NM_001507    | motilin receptor                                                                      | -2.1119905 down | -2.2022471 down |

|              |              |                                                                                    |                 |                 |
|--------------|--------------|------------------------------------------------------------------------------------|-----------------|-----------------|
| LINC00265    | NR_026999    | long intergenic non-protein coding RNA 265                                         | -3.0890703 down | -10.263503 down |
| FAM46B       | NM_052943    | family with sequence similarity 46, member B                                       | -2.7220135 down | -2.3069835 down |
| LOC100131242 | AK124483     | uncharacterized LOC100131242                                                       | -6.7647185 down | -3.5512571 down |
| KCNMA1       | NM_001271520 | potassium large conductance calcium-activated channel, subfamily M, alpha member 1 | -4.62325 down   | -2.2860222 down |
| C22orf24     | NM_015372    | chromosome 22 open reading frame 24                                                | -5.1430025 down | -3.5211573 down |
| SLC2A12      | NM_145176    | solute carrier family 2 (facilitated glucose transporter), member 12               | -2.7787275 down | -3.3910832 down |
| LONRF2       | NM_198461    | LON peptidase N-terminal domain and ring finger 2                                  | -6.4311395 down | -3.2625039 down |
| XAGE1A       | NM_001097592 | X antigen family, member 1A                                                        | -5.9906077 down | -3.8157604 down |
|              |              |                                                                                    | -5.939781 down  | -3.477825 down  |
| KISS1        | NM_002256    | KiSS-1 metastasis-suppressor                                                       | -2.2105904 down | -2.3801632 down |
| LOC728613    |              | programmed cell death 6 pseudogene                                                 | -4.78385 down   | -4.9963565 down |
| SPATA13      | AK092754     | spermatogenesis associated 13                                                      | -3.8933823 down | -3.1779885 down |
| LIPG         | NM_006033    | lipase, endothelial                                                                | -2.362314 down  | -2.2022915 down |
| MATN1        | NM_002379    | matrilin 1, cartilage matrix protein                                               | -3.2768407 down | -2.150094 down  |
| LINC00640    | NR_038358    | long intergenic non-protein coding RNA 640                                         | -3.1292577 down | -2.2213464 down |
| LINC00537    | XR_246700    | long intergenic non-protein coding RNA 537                                         | -2.5830874 down | -2.9399838 down |
|              |              |                                                                                    | -3.5642037 down | -2.74192 down   |
| TNFAIP8L1    | NM_001167942 | tumor necrosis factor, alpha-induced protein 8-like 1                              | -6.1978087 down | -2.8801103 down |
| ATOH7        | NM_145178    | atonal homolog 7 (Drosophila)                                                      | -2.5730178 down | -3.0680246 down |
| IGFL4        |              | IGF-like family member 4                                                           | -4.258593 down  | -2.6725647 down |
| KRBA2        | NM_213597    | KRAB-A domain containing 2                                                         | -3.341646 down  | -2.636628 down  |
|              |              |                                                                                    | -6.3981156 down | -3.1327965 down |
| LOC654780    | AK095331     | SFPQ                                                                               | -3.0009508 down | -2.1665819 down |
| LOC285758    |              | uncharacterized LOC285758                                                          | -7.021153 down  | -6.7411222 down |
| BEGAIN       | NM_001159531 | brain-enriched guanylate kinase-associated                                         | -2.6326988 down | -2.8482418 down |
| IFITM5       | NM_001025295 | interferon induced transmembrane protein 5                                         | -4.1292477 down | -3.7229087 down |
|              |              |                                                                                    | -2.8375366 down | -4.615257 down  |
| SRPX         | NM_006307    | sushi-repeat containing protein, X-linked                                          | -4.989093 down  | -2.3670316 down |
|              |              |                                                                                    | -3.950959 down  | -2.0965304 down |
| WWC2-AS2     | NR_024008    | WWC2 antisense RNA 2                                                               | -4.723164 down  | -2.3429992 down |
| HMBOX1       | XM_005273634 | homeobox containing 1                                                              | -6.382482 down  | -4.5809073 down |
| CDH24        | NM_022478    | cadherin 24, type 2                                                                | -5.361275 down  | -8.422184 down  |
| SIGLEC16     | NR_002825    | sialic acid binding Ig-like lectin 16 (gene/pseudogene)                            | -2.0913475 down | -2.8121698 down |
| ICMT         | BC017037     | isoprenylcysteine carboxyl methyltransferase                                       | -2.5117805 down | -2.7361953 down |
| PRSS50       | NM_013270    | protease, serine, 50                                                               | -3.8746665 down | -2.275281 down  |
|              |              |                                                                                    | -4.589399 down  | -2.977569 down  |
|              |              |                                                                                    | -4.056352 down  | -2.0973783 down |
| FRMD4A       | AK001072     | FERM domain containing 4A                                                          | -5.396286 down  | -5.5562153 down |
| RYR2         | NM_001035    | ryanodine receptor 2 (cardiac)                                                     | -3.1924555 down | -2.3227167 down |
| ANKMY2       | NM_020319    | ankyrin repeat and MYND domain containing 2                                        | -2.4281106 down | -2.540638 down  |
|              |              |                                                                                    | -2.1460063 down | -2.3498874 down |
| LOC101930210 | XR_246852    | protein capicua homolog                                                            | -3.987064 down  | -3.8640091 down |
| PGC          | NM_002630    | progastricsin (pepsinogen C)                                                       | -3.061083 down  | -3.787712 down  |
| ANKRD33B     |              | ankyrin repeat domain 33B                                                          | -4.4069405 down | -2.1035476 down |
| LOC392364    | NR_040117    | nuclear pore associated protein 1 pseudogene                                       | -8.982032 down  | -4.0242825 down |
|              |              |                                                                                    | -4.7029734 down | -4.641126 down  |
| C19orf80     | NM_018687    | chromosome 19 open reading frame 80                                                | -4.1604776 down | -2.9006255 down |
| PRELID2      | NM_138492    | PRELI domain containing 2                                                          | -2.774592 down  | -2.567545 down  |
|              | AF130090     |                                                                                    | -2.1519656 down | -2.12819 down   |
|              | AK002210     |                                                                                    | -3.0624077 down | -2.419726 down  |
| PARP10       | NM_032789    | poly (ADP-ribose) polymerase family, member 10                                     | -2.3700228 down | -3.0117638 down |
| ENTPD1-AS1   | NR_038444    | ENTPD1 antisense RNA 1                                                             | -4.6143446 down | -2.0298798 down |
|              | DA967691     |                                                                                    | -6.460211 down  | -3.8911455 down |
| C1orf95      | NM_001003665 | chromosome 1 open reading frame 95                                                 | -4.16224 down   | -2.8651948 down |
| PLAC4        | NM_182832    | placenta-specific 4                                                                | -4.465535 down  | -2.899971 down  |
| MUC22        | NM_001198815 | mucin 22                                                                           | -3.7509608 down | -2.2997468 down |
| ASS1         | NM_000050    | argininosuccinate synthase 1                                                       | -7.2687473 down | -2.3587267 down |
| HSPA12B      | NM_052970    | heat shock 70kD protein 12B                                                        | -8.000544 down  | -6.8582325 down |
| MREG         | NM_018000    | melanoregulin                                                                      | -3.8753052 down | -2.5230293 down |
| AIM1L        | NM_001039775 | absent in melanoma 1-like                                                          | -2.3814204 down | -2.0896115 down |
| CLDN9        | NM_020982    | claudin 9                                                                          | -2.284755 down  | -2.3201125 down |
|              | AK055281     |                                                                                    | -3.8784013 down | -6.856401 down  |



|               |              |                                                               |                 |                 |
|---------------|--------------|---------------------------------------------------------------|-----------------|-----------------|
|               |              |                                                               | -3.5241735 down | -3.6521168 down |
| RARB          | NM_000965    | retinoic acid receptor, beta                                  | -2.4316323 down | -2.0805387 down |
| HOXA2         | NM_006735    | homeobox A2                                                   | -9.283564 down  | -7.2102246 down |
| SCNN1D        | NM_001130413 | sodium channel, non-voltage-gated 1, delta subunit            | -4.4984703 down | -2.8304255 down |
|               | AK126599     |                                                               | -2.272024 down  | -2.2630346 down |
|               |              |                                                               | -3.466794 down  | -2.512548 down  |
| ADH4          | NM_000670    | alcohol dehydrogenase 4 (class II), pi polypeptide            | -5.3756394 down | -5.839934 down  |
| LOC153811     | AK021734     | uncharacterized LOC153811                                     | -2.1625905 down | -2.077881 down  |
| ZNF750        | NM_024702    | zinc finger protein 750                                       | -2.105438 down  | -2.2620246 down |
| GDA           | NM_004293    | guanine deaminase                                             | -5.3868537 down | -2.3238697 down |
| DKFZP547J0410 | AL050263     | DKFZP547J0410 protein                                         | -6.3094077 down | -2.1034982 down |
| ANKRD20A5P    | NR_040113    | ankyrin repeat domain 20 family, member A5, pseudogene        | -3.8878298 down | -3.301266 down  |
| LOC100132474  | AK125160     | uncharacterized LOC100132474                                  | -5.5846457 down | -4.3550954 down |
| LOC101928426  | XM_005262504 | basic salivary proline-rich protein 2-like                    | -2.4671354 down | -2.1240373 down |
| TEKT5         | NM_144674    | tektin 5                                                      | -3.534046 down  | -2.1575022 down |
| RPL23AP7      |              | ribosomal protein L23a pseudogene 7                           | -2.0044103 down | -4.298498 down  |
| CYTH1         | AK123894     | cytohesin 1                                                   | -8.135434 down  | -3.669139 down  |
| C14orf23      | NR_026731    | chromosome 14 open reading frame 23                           | -3.1571982 down | -2.0129092 down |
|               |              |                                                               | -4.117132 down  | -3.1985557 down |
| PLCE1         | NM_016341    | phospholipase C, epsilon 1                                    | -5.704092 down  | -4.449349 down  |
|               |              |                                                               | -4.1643095 down | -2.488993 down  |
|               |              |                                                               | -2.06069 down   | -3.2373679 down |
| HOXD3         | NM_006898    | homeobox D3                                                   | -3.6895819 down | -4.82493 down   |
| C16orf78      | NM_144602    | chromosome 16 open reading frame 78                           | -2.2827077 down | -2.8015893 down |
|               |              |                                                               | -3.9657881 down | -3.0303025 down |
| FAM95B1       |              | family with sequence similarity 95, member B1                 | -6.9745016 down | -6.628003 down  |
| LOC100996405  | XM_003846604 | uncharacterized LOC100996405                                  | -4.227307 down  | -3.8447871 down |
| TRIM49        | NM_020358    | tripartite motif containing 49                                | -4.4292817 down | -2.952903 down  |
| CARD10        | NM_014550    | caspace recruitment domain family, member 10                  | -3.1858025 down | -2.5354111 down |
| CDK20         | NM_001039803 | cyclin-dependent kinase 20                                    | -2.0132074 down | -2.9887044 down |
| ITGB1BP2      | NM_012278    | integrin beta 1 binding protein (melusin) 2                   | -5.0998955 down | -3.6831837 down |
| HILS1         | NR_024193    | histone linker H1 domain, spermatid-specific 1, pseudogene    | -6.504197 down  | -2.1705287 down |
| MAFIP         | NR_046439    | MAFF interacting protein (pseudogene)                         | -2.3858893 down | -4.0018263 down |
| FIGNL2        | NM_001013690 | figdgetin-like 2                                              | -6.216129 down  | -7.0376697 down |
| FLJ16126      | BC130506     | uncharacterized LOC645010                                     | -3.0474324 down | -2.6852047 down |
|               | AK094078     |                                                               | -3.32062 down   | -2.536136 down  |
|               |              |                                                               | -2.4806254 down | -2.242781 down  |
|               |              |                                                               | -2.2267606 down | -2.1346881 down |
|               |              |                                                               | -5.5596623 down | -3.0330968 down |
| FLJ45079      | NR_028337    | FLJ45079 protein                                              | -3.5942397 down | -2.9329846 down |
| FAM188B       | NM_032222    | family with sequence similarity 188, member B                 | -2.208694 down  | -2.7789786 down |
|               |              |                                                               | -3.7954915 down | -2.2357159 down |
| TTC9B         | NM_152479    | tetratricopeptide repeat domain 9B                            | -2.3041391 down | -5.811311 down  |
|               | XM_005275749 |                                                               | -4.0413184 down | -2.5914798 down |
|               |              |                                                               | -3.9764905 down | -3.4983406 down |
| GJB1          | NM_000166    | gap junction protein, beta 1, 32kDa                           | -5.241464 down  | -2.311607 down  |
| C2CD2         | AK129520     | C2 calcium-dependent domain containing 2                      | -3.0305173 down | -3.1529033 down |
|               | XR_243167    |                                                               | -4.9343033 down | -5.7813587 down |
| CACNG7        | NM_031896    | calcium channel, voltage-dependent, gamma subunit 7           | -2.3234606 down | -2.189293 down  |
| SEC14L3       | NM_174975    | SEC14-like 3 (S. cerevisiae)                                  | -3.0333176 down | -2.3337786 down |
| RNF44         | XM_005265842 | ring finger protein 44                                        | -2.6866064 down | -2.272156 down  |
| AQP7P1        |              | aquaporin 7 pseudogene 1                                      | -3.6866508 down | -5.191415 down  |
|               |              |                                                               | -4.472773 down  | -2.1274254 down |
| EVPLL         | NM_001145127 | envoplakin-like                                               | -2.6809144 down | -2.7900255 down |
| MYB           | XM_005267001 | v-myb avian myeloblastosis viral oncogene homolog             | -6.1278763 down | -2.402128 down  |
|               | AY043127     |                                                               | -3.135213 down  | -3.5069249 down |
| CYP3A7        | NM_000765    | cytochrome P450, family 3, subfamily A, polypeptide 7         | -4.6630445 down | -2.7026408 down |
| SLC4A11       | NM_032034    | solute carrier family 4, sodium borate transporter, member 11 | -2.8201563 down | -3.8291397 down |
|               |              |                                                               | -7.3692164 down | -6.0088816 down |
| TNR           | NM_003285    | tenascin R                                                    | -7.25473 down   | -3.688181 down  |
| CDH26         | AF169690     | cadherin 26                                                   | -6.338106 down  | -2.5530965 down |

|              |              |                                                                |                 |                 |
|--------------|--------------|----------------------------------------------------------------|-----------------|-----------------|
| WEE2         | NM_001105558 | WEE1 homolog 2 (S. pombe)                                      | -5.4077764 down | -2.0671835 down |
| LOC283140    | XR_247724    | uncharacterized LOC283140                                      | -2.933328 down  | -2.5002172 down |
| STARD13      | AY082592     | StAR-related lipid transfer (START) domain containing 13       | -4.6400976 down | -6.3124475 down |
| KRTAP22-1    | BC101686     | keratin associated protein 22-1                                | -2.7501624 down | -2.193338 down  |
| HIP1         | AY358103     | huntingtin interacting protein 1                               | -2.891669 down  | -4.580367 down  |
| SPINT3       | NM_006652    | serine peptidase inhibitor, Kunitz type, 3                     | -2.2559807 down | -2.1773279 down |
| TRAIP        | NM_005879    | TRAF interacting protein                                       | -3.5846562 down | -2.61517 down   |
|              |              |                                                                | -2.6725955 down | -2.0892658 down |
|              |              |                                                                | -3.5203722 down | -2.3094718 down |
|              |              |                                                                | -4.4513683 down | -4.216011 down  |
|              |              |                                                                | -6.562516 down  | -3.1852612 down |
| RSG1         | NM_030907    | REM2 and RAB-like small GTPase 1                               | -3.4372394 down | -2.7162266 down |
| KATNAL2      | NM_031303    | katanin p60 subunit A-like 2                                   | -7.3391366 down | -3.7840579 down |
| LRRC27       | NM_001143757 | leucine rich repeat containing 27                              | -2.0544841 down | -2.0007784 down |
|              |              |                                                                | -5.568514 down  | -3.4921243 down |
| CASC5        | NM_170589    | cancer susceptibility candidate 5                              | -8.423703 down  | -2.6278677 down |
|              | XR_241567    |                                                                | -3.3718548 down | -3.7753386 down |
| LOC284628    |              | uncharacterized LOC284628                                      | -2.3500805 down | -2.0210927 down |
|              |              |                                                                | -3.7812335 down | -2.4951174 down |
| ZBTB46       | NM_025224    | zinc finger and BTB domain containing 46                       | -3.1657815 down | -2.4187608 down |
| OR4P4        | NM_001004124 | olfactory receptor, family 4, subfamily P, member 4            | -3.9142623 down | -2.0618207 down |
| BPIFA1       | NM_130852    | BPI fold containing family A, member 1                         | -3.3350966 down | -2.1941106 down |
|              |              |                                                                | -4.8065295 down | -2.262546 down  |
| ARHGAP33     | AY044864     | Rho GTPase activating protein 33                               | -8.100466 down  | -3.8457866 down |
|              |              |                                                                | -3.883319 down  | -2.1764355 down |
| JSRP1        | NM_144616    | junctional sarcoplasmic reticulum protein 1                    | -2.617098 down  | -2.1416838 down |
| KRTAP21-1    | NM_181619    | keratin associated protein 21-1                                | -2.7263892 down | -2.2723818 down |
| DCDC2B       | NM_001099434 | doublecortin domain containing 2B                              | -2.467398 down  | -3.0515325 down |
|              |              |                                                                | -8.121333 down  | -2.458312 down  |
| LANCL3       | NM_198511    | LanC lantibiotic synthetase component C-like 3 (bacterial)     | -3.333469 down  | -3.9324112 down |
|              |              |                                                                | -2.4194882 down | -2.147342 down  |
| POTEA        | NM_001005365 | POTE ankyrin domain family, member A                           | -4.14527 down   | -2.153182 down  |
| FXYD5        | AF177940     | FXYD domain containing ion transport regulator 5               | -2.6237252 down | -3.351646 down  |
| ZNF833P      | NR_028594    | zinc finger protein 833, pseudogene                            | -3.313393 down  | -3.2071152 down |
|              |              |                                                                | -2.7475557 down | -3.576794 down  |
| CD70         | NM_001252    | CD70 molecule                                                  | -4.5155106 down | -2.6214747 down |
| NIFK-AS1     | NR_037857    | NIFK antisense RNA 1                                           | -3.7612462 down | -2.4693296 down |
| FUT5         | NM_002034    | fucosyltransferase 5 (alpha (1,3) fucosyltransferase)          | -3.9949164 down | -5.0115747 down |
| LOC440910    | NR_030728    | uncharacterized LOC440910                                      | -2.980566 down  | -2.178331 down  |
| LINC00910    | AK127427     | long intergenic non-protein coding RNA 910                     | -5.5718756 down | -2.6120749 down |
|              | AK092728     |                                                                | -5.614942 down  | -3.9423654 down |
| RDH8         | NM_015725    | retinol dehydrogenase 8 (all-trans)                            | -2.50793 down   | -2.9215565 down |
| RBP5         | NM_031491    | retinol binding protein 5, cellular                            | -4.0440464 down | -3.0047588 down |
| LOC729800    |              | ZP domain-containing protein LOC729800-like                    | -5.677417 down  | -3.5357096 down |
| ASPIN        | NM_001193335 | asporin                                                        | -4.8149104 down | -3.1003358 down |
| OSBPL1A      | NM_080597    | oxysterol binding protein-like 1A                              | -3.3080153 down | -2.3265214 down |
| FILIP1       | NM_015687    | filamin A interacting protein 1                                | -4.325328 down  | -4.686489 down  |
| CLCN3        | NM_004366    | chloride channel, voltage-sensitive 2                          | -2.1723602 down | -3.5596416 down |
| TUBB3        | NM_006086    | tubulin, beta 3 class III                                      | -2.5607321 down | -2.9997253 down |
| PNPLA5       | NM_138814    | patatin-like phospholipase domain containing 5                 | -2.759226 down  | -2.1336887 down |
|              |              |                                                                | -2.06931 down   | -2.929605 down  |
| SSC5D        | NM_001144950 | scavenger receptor cysteine rich domain containing (5 domains) | -2.9397655 down | -4.202606 down  |
|              |              |                                                                | -3.31682 down   | -2.1304648 down |
| PDE1C        | NM_005020    | phosphodiesterase 1C, calmodulin-dependent 70kDa               | -3.563801 down  | -2.0257459 down |
| TMEM254      | NM_025125    | transmembrane protein 254                                      | -2.029224 down  | -2.027727 down  |
| STAR         | NM_000349    | steroidogenic acute regulatory protein                         | -2.4905252 down | -2.6234725 down |
| ZNF496       | NM_032752    | zinc finger protein 496                                        | -2.0337863 down | -2.1253622 down |
| KCNK17       | NM_031460    | potassium channel, subfamily K, member 17                      | -2.0733569 down | -2.324354 down  |
| RASGEF1C     | NM_175062    | RasGEF domain family, member 1C                                | -4.494135 down  | -2.5676343 down |
| LINC00479    | NR_027272    | long intergenic non-protein coding RNA 479                     | -5.7776327 down | -4.0778666 down |
| LOC100506688 | NR_104614    | uncharacterized LOC100506688                                   | -4.2683935 down | -2.596568 down  |

|              |              |                                                                          |                 |                 |
|--------------|--------------|--------------------------------------------------------------------------|-----------------|-----------------|
| KRTAP2-3     | NM_001165252 | keratin associated protein 2-3                                           | -2.3841586 down | -2.2337527 down |
| AKR1B15      | NM_001080538 | aldo-keto reductase family 1, member B15                                 | -4.6705494 down | -2.1337974 down |
| ADAMTS16     | NM_139056    | ADAM metalloproteinase with thrombospondin type 1 motif, 16              | -3.0361693 down | -3.2559235 down |
| RABEPK       | AL832249     | Rab9 effector protein with kelch motifs                                  | -2.301904 down  | -2.7702084 down |
| SLC4A10      | NM_022058    | solute carrier family 4, sodium bicarbonate transporter, member 10       | -2.200645 down  | -2.6917078 down |
| OXCT2        | NM_022120    | 3-oxoacid CoA transferase 2                                              | -2.7740047 down | -2.0726116 down |
| FAM101A      | NM_181709    | family with sequence similarity 101, member A                            | -6.9708815 down | -5.0124717 down |
| LOC101929847 |              | golgin subfamily A member 2-like protein 3-like                          | -4.146473 down  | -2.4807687 down |
| TRIP13       | NM_004237    | thyroid hormone receptor interactor 13                                   | -3.2175422 down | -2.0441926 down |
| FAM184A      | BX640728     | family with sequence similarity 184, member A                            | -6.394074 down  | -2.818335 down  |
|              |              |                                                                          | -7.104944 down  | -6.231032 down  |
| MCF2L        | NM_024979    | MCF.2 cell line derived transforming sequence-like                       | -3.2454245 down | -2.4111705 down |
| USP2-AS1     | AK130019     | USP2 antisense RNA 1 (head to head)                                      | -3.144454 down  | -2.4094837 down |
|              |              |                                                                          | -4.0224037 down | -2.2229578 down |
| OBSCN        | NM_052843    | obscurin, cytoskeletal calmodulin and titin-interacting RhoGEF           | -2.8314023 down | -2.9657788 down |
|              |              |                                                                          | -4.04259 down   | -2.9328835 down |
|              |              |                                                                          | -6.907095 down  | -7.210703 down  |
|              |              |                                                                          | -3.9782977 down | -2.40387 down   |
| PRSS38       | NM_183062    | protease, serine, 38                                                     | -7.0407524 down | -4.308838 down  |
| ZDHHC20      | BC034944     | zinc finger, DHHC-type containing 20                                     | -5.1861024 down | -2.653478 down  |
| INE1         | NR_024616    | inactivation escape 1 (non-protein coding)                               | -4.8058147 down | -2.4841604 down |
| DRD2         | NM_000795    | dopamine receptor D2                                                     | -4.1984577 down | -2.098226 down  |
| LOC6433327   | AK096549     | uncharacterized LOC6433327                                               | -3.9665527 down | -2.3396132 down |
| AQP4-AS1     | NR_026908    | AQP4 antisense RNA 1                                                     | -2.1082878 down | -2.2112362 down |
| HOXB13       | NM_006361    | homeobox B13                                                             | -5.8375278 down | -3.7711306 down |
|              | AK126601     |                                                                          | -2.9459722 down | -3.1251743 down |
| LOC400752    | NR_024270    | uncharacterized LOC400752                                                | -3.2062156 down | -2.4061265 down |
| LOC100131043 | AK124222     | uncharacterized LOC100131043                                             | -2.9896443 down | -3.286456 down  |
| IMMT         | NM_001100170 | inner membrane protein, mitochondrial                                    | -2.81435 down   | -2.6078925 down |
| SCNN1G       | NM_001039    | sodium channel, non-voltage-gated 1, gamma subunit                       | -3.7129946 down | -2.1228693 down |
|              |              |                                                                          | -5.527194 down  | -3.530172 down  |
| GFM1         | AK022724     | G elongation factor, mitochondrial 1                                     | -2.9672923 down | -3.4136693 down |
| LINC00243    | XR_159139    | long intergenic non-protein coding RNA 243                               | -3.0639231 down | -2.547695 down  |
| CNGA4        | NM_001037329 | cyclic nucleotide gated channel alpha 4                                  | -5.126623 down  | -2.4353645 down |
| TTYT5        |              | testis-specific transcript, Y-linked 5 (non-protein coding)              | -5.2447047 down | -3.821448 down  |
| HSP90AB4P    | NR_073415    | heat shock protein 90kDa alpha (cytosolic), class B member 4, pseudogene | -2.23193 down   | -2.056503 down  |
| IL26         | NM_018402    | interleukin 26                                                           | -5.910685 down  | -5.722428 down  |
| FLJ41455     | AK123449     | uncharacterized LOC441441                                                | -3.5164332 down | -3.128099 down  |
| DIO2         | NM_013989    | deiodinase, iodothyronine, type II                                       | -3.1742823 down | -2.5414531 down |
| AVPR1B       | NM_000707    | arginine vasopressin receptor 1B                                         | -2.363095 down  | -3.216929 down  |
|              |              |                                                                          | -2.5052896 down | -2.1526978 down |
|              | DB053889     |                                                                          | -3.6354737 down | -3.9369462 down |
| EBPL         | NR_103802    | emopamil binding protein-like                                            | -3.90579 down   | -3.1389692 down |
| LOC100128001 | AK125720     | uncharacterized LOC100128001                                             | -6.692714 down  | -5.13357 down   |
|              | AK095132     |                                                                          | -6.0531936 down | -2.3890495 down |
| OR10G2       | NM_001005466 | olfactory receptor, family 10, subfamily G, member 2                     | -2.3035967 down | -3.315201 down  |
| KRT8P41      | NR_027713    | keratin 8 pseudogene 41                                                  | -4.6306205 down | -2.871 down     |
| MGC16275     | NR_026914    | uncharacterized protein MGC16275                                         | -2.0273113 down | -2.3972409 down |
| HES2         | BC012091     | hes family bHLH transcription factor 2                                   | -2.453654 down  | -2.0149393 down |
| NPPC         | NM_024409    | natriuretic peptide C                                                    | -2.9862602 down | -2.2403631 down |
| LOC389831    | NM_001242480 | uncharacterized LOC389831                                                | -6.8795314 down | -5.603441 down  |
| XLOC_014512  |              |                                                                          | -4.342132 down  | -2.6453834 down |
| LINC00478    | NR_027790    | long intergenic non-protein coding RNA 478                               | -2.500025 down  | -2.1834679 down |
| TMEM177      | AK311734     | transmembrane protein 177                                                | -3.8832707 down | -2.816161 down  |
| GOLGA6L9     | NM_198181    | golgin A6 family-like 9                                                  | -4.7038183 down | -2.6304502 down |
| OR2L2        | NM_001004686 | olfactory receptor, family 2, subfamily L, member 2                      | -4.306786 down  | -2.3532882 down |
| POFUT1       | NM_172236    | protein O-fucosyltransferase 1                                           | -2.7953544 down | -2.8667874 down |
| LINC00661    |              | long intergenic non-protein coding RNA 661                               | -3.4698396 down | -2.3260567 down |
|              |              |                                                                          | -2.2811232 down | -2.3419116 down |
| PARP1        |              | poly (ADP-ribose) polymerase 1                                           | -4.216585 down  | -2.5167377 down |

|              |              |                                                                                         |                 |                 |
|--------------|--------------|-----------------------------------------------------------------------------------------|-----------------|-----------------|
| REXO1L2P     | NR_003594    | REX1, RNA exonuclease 1 homolog (S. cerevisiae)-like 2 (pseudogene)                     | -8.747213 down  | -6.7877603 down |
|              |              |                                                                                         | -2.7141654 down | -3.81782 down   |
|              |              |                                                                                         | -2.2623057 down | -3.6396644 down |
| LINC00634    | NR_024355    | long intergenic non-protein coding RNA 634                                              | -4.4256353 down | -2.6002984 down |
| ITPK1-AS1    | NR_002808    | ITPK1 antisense RNA 1                                                                   | -2.1100764 down | -3.1966882 down |
| CHN2         |              | chimerin 2                                                                              | -2.1069708 down | -3.3470228 down |
| KRTAP26-1    | NM_203405    | keratin associated protein 26-1                                                         | -2.9844346 down | -2.1406884 down |
|              |              |                                                                                         | -3.0447924 down | -2.2138312 down |
|              |              |                                                                                         | -3.0453627 down | -2.482147 down  |
| STXBP5L      | NM_014980    | syntaxin binding protein 5-like                                                         | -4.401448 down  | -2.0890753 down |
| FAM230C      | XR_246982    | family with sequence similarity 230, member C                                           | -3.9510932 down | -5.4164205 down |
| MED15P9      | BC036597     | mediator complex subunit 15 pseudogene 9                                                | -3.685006 down  | -3.2048664 down |
| ZNF503-AS2   | NR_024421    | ZNF503 antisense RNA 2                                                                  | -4.7052536 down | -2.3035274 down |
| LOC650293    | NM_001040071 | seven transmembrane helix receptor                                                      | -3.7780097 down | -6.540019 down  |
|              | BC040619     |                                                                                         | -6.669156 down  | -5.4872065 down |
| TAF5L        |              | TAF5-like RNA polymerase II, p300/CBP-associated factor (PCAF)-associated factor, 65kDa | -3.4269083 down | -2.3891914 down |
| MGC39545     | XR_110535    | uncharacterized LOC403312                                                               | -3.1313677 down | -2.1363657 down |
| B4GALNT2     | NM_153446    | beta-1,4-N-acetyl-galactosaminyl transferase 2                                          | -3.1871336 down | -2.0449708 down |
|              |              |                                                                                         | -2.2826583 down | -2.1958797 down |
| POM121L8P    | NR_024583    | POM121 transmembrane nucleoporin-like 8 pseudogene                                      | -5.051601 down  | -7.818869 down  |
|              |              |                                                                                         | -2.7276943 down | -2.0610745 down |
| CTPS2        | NM_001144002 | CTP synthase 2                                                                          | -3.576919 down  | -2.0952806 down |
| MROH2A       |              | maestro heat-like repeat family member 2A                                               | -2.824729 down  | -2.594823 down  |
| AKAP1        | NM_003488    | A kinase (PRKA) anchor protein 1                                                        | -6.781774 down  | -6.650966 down  |
|              |              |                                                                                         | -3.3637526 down | -3.730161 down  |
| PAK3         | NM_002578    | p21 protein (Cdc42/Rac)-activated kinase 3                                              | -7.558883 down  | -3.365554 down  |
| FBLN1        | NM_006486    | fibulin 1                                                                               | -3.014256 down  | -3.6865642 down |
| SPRR2E       | NM_001024209 | small proline-rich protein 2E                                                           | -3.9378178 down | -2.9355419 down |
|              |              |                                                                                         | -3.032016 down  | -2.0585797 down |
| C2CD4B       | NM_001007595 | C2 calcium-dependent domain containing 4B                                               | -2.3726068 down | -3.2585046 down |
| CHRNA1       | NM_001039523 | cholinergic receptor, nicotinic, alpha 1 (muscle)                                       | -3.457899 down  | -4.53592 down   |
| CRHR1        | NM_001145148 | corticotropin releasing hormone receptor 1                                              | -2.697257 down  | -2.5290244 down |
|              |              |                                                                                         | -2.8683896 down | -2.354647 down  |
| TAS2R30      | NM_001097643 | taste receptor, type 2, member 30                                                       | -4.41865 down   | -2.4881923 down |
| VAX1         | NM_001112704 | ventral anterior homeobox 1                                                             | -4.890126 down  | -3.3857303 down |
|              |              |                                                                                         | -5.7741895 down | -5.241445 down  |
|              |              |                                                                                         | -3.9164226 down | -2.1355317 down |
| C6orf164     | NR_026784    | chromosome 6 open reading frame 164                                                     | -2.8960931 down | -2.4579763 down |
| ACAN         | NM_001135    | aggrecan                                                                                | -3.3048954 down | -3.8159482 down |
| BCAS1        | NM_003657    | breast carcinoma amplified sequence 1                                                   | -3.4770348 down | -2.7943482 down |
| LOC101930210 | XR_246852    | protein capicua homolog                                                                 | -5.241599 down  | -6.458739 down  |
| LRRTM4       | NM_024993    | leucine rich repeat transmembrane neuronal 4                                            | -2.4008393 down | -2.0386956 down |
|              | BC050023     |                                                                                         | -8.402515 down  | -4.641401 down  |
| LOC100128402 | AK124574     | uncharacterized LOC100128402                                                            | -2.4591472 down | -3.4809797 down |
| KRTAP5-5     | NM_001001480 | keratin associated protein 5-5                                                          | -3.1588116 down | -2.3037202 down |
| MAP3K10      | NM_002446    | mitogen-activated protein kinase kinase kinase 10                                       | -2.6512883 down | -3.0484006 down |
| MAGEB10      | NM_182506    | melanoma antigen family B, 10                                                           | -5.0158195 down | -2.435996 down  |
|              | XM_005263847 |                                                                                         | -3.0371017 down | -2.6299403 down |
| DRGX         |              | dorsal root ganglia homeobox                                                            | -2.583394 down  | -2.05292 down   |
| SHOX         | NM_006883    | short stature homeobox                                                                  | -4.9061747 down | -4.3361726 down |
|              | XR_243792    |                                                                                         | -4.3647003 down | -3.4306297 down |
| CXorf64      | NM_001122716 | chromosome X open reading frame 64                                                      | -2.4640534 down | -2.1719856 down |
| KRT26        | NM_181539    | keratin 26                                                                              | -2.13939 down   | -2.0922265 down |
| MUCL1        | NM_058173    | mucin-like 1                                                                            | -3.6118934 down | -3.1079416 down |
|              |              |                                                                                         | -2.0161433 down | -2.6670797 down |
| PTN          | NM_002825    | pleiotrophin                                                                            | -5.1150107 down | -2.4462154 down |
| PTPRH        | NM_002842    | protein tyrosine phosphatase, receptor type, H                                          | -4.100824 down  | -2.4729233 down |
| C17orf82     | NM_203425    | chromosome 17 open reading frame 82                                                     | -4.369473 down  | -3.0048323 down |
| CSH1         | NM_001317    | chorionic somatomammotropin hormone 1 (placental lactogen)                              | -2.5124705 down | -3.4446065 down |
| OR6P1        | NM_001160325 | olfactory receptor, family 6, subfamily P, member 1                                     | -5.5802674 down | -2.0816424 down |
| SERINC2      | NM_178865    | serine incorporator 2                                                                   | -2.2564945 down | -2.1549928 down |

|              |              |                                                                                        |                 |                 |
|--------------|--------------|----------------------------------------------------------------------------------------|-----------------|-----------------|
| PPP1R1C      | NM_001080545 | protein phosphatase 1, regulatory (inhibitor) subunit 1C                               | -2.3891208 down | -2.2610533 down |
| MAP3K13      | NM_004721    | mitogen-activated protein kinase kinase kinase 13                                      | -3.7432306 down | -2.3992116 down |
| STAU2-AS1    | NR_038406    | STAU2 antisense RNA 1                                                                  | -2.7688327 down | -2.489578 down  |
| DEFB1        | NM_005218    | defensin, beta 1                                                                       | -7.353411 down  | -2.3869355 down |
| PDILT        | NM_174924    | protein disulfide isomerase-like, testis expressed                                     | -7.540905 down  | -4.672183 down  |
|              | XM_005276061 |                                                                                        | -2.3770661 down | -2.4421797 down |
| LOC729020    | NM_001143909 | rcRPE                                                                                  | -4.013231 down  | -2.6608815 down |
| OTC          | NM_000531    | ornithine carbamoyltransferase                                                         | -2.5970876 down | -3.4451053 down |
| CAPN13       | NM_144575    | calpain 13                                                                             | -2.9244206 down | -3.1888301 down |
|              | BX648501     |                                                                                        | -2.4813714 down | -2.9855356 down |
| TMEM132E     | NM_207313    | transmembrane protein 132E                                                             | -3.091431 down  | -4.284696 down  |
| TRIM17       | NM_016102    | tripartite motif containing 17                                                         | -4.3472695 down | -3.620156 down  |
| MBD3L1       | NM_145208    | methyl-CpG binding domain protein 3-like 1                                             | -4.395825 down  | -3.1835573 down |
| TP53TG3      | NM_016212    | TP53 target 3                                                                          | -2.395882 down  | -2.0361729 down |
|              | AK024906     |                                                                                        | -4.0546193 down | -2.464693 down  |
| AP1S2        | XM_005274612 | adaptor-related protein complex 1, sigma 2 subunit                                     | -3.997316 down  | -2.379591 down  |
| ODF3B        | NM_001014440 | outer dense fiber of sperm tails 3B                                                    | -2.1032474 down | -3.0685577 down |
|              | XR_245823    |                                                                                        | -3.6191506 down | -2.9917042 down |
| CYP46A1      | AB209749     | cytochrome P450, family 46, subfamily A, polypeptide 1                                 | -4.347425 down  | -2.2400594 down |
|              |              |                                                                                        | -2.9855435 down | -2.6587827 down |
| CT45A5       | NM_001007551 | cancer/testis antigen family 45, member A5                                             | -4.472325 down  | -8.094015 down  |
| C6orf118     | NM_144980    | chromosome 6 open reading frame 118                                                    | -5.746527 down  | -2.1295283 down |
|              |              |                                                                                        | -2.306612 down  | -3.1050115 down |
| EMR4P        | AY181245     | egf-like module containing, mucin-like, hormone receptor-like 4 pseudogene             | -2.3178992 down | -2.3522377 down |
| LOC100131303 | NM_001282442 | uncharacterized LOC100131303                                                           | -4.5085297 down | -3.6261485 down |
| LINC00328    | AF172850     | long intergenic non-protein coding RNA 328                                             | -4.8891616 down | -3.3823345 down |
| C18orf64     | NM_001243517 | chromosome 18 open reading frame 64                                                    | -8.573052 down  | -5.265971 down  |
| OR4M1        | NM_001005500 | olfactory receptor, family 4, subfamily M, member 1                                    | -3.0773025 down | -2.6218333 down |
| EPX          | NM_000502    | eosinophil peroxidase                                                                  | -2.1059031 down | -2.1721497 down |
|              |              |                                                                                        | -3.5672867 down | -2.6959102 down |
| PLK1         | NM_005030    | polo-like kinase 1                                                                     | -3.6753976 down | -2.1234255 down |
| IGSF21       | NM_032880    | immunoglobulin superfamily, member 21                                                  | -2.9224963 down | -2.7440553 down |
| LOC152286    | AL117431     | uncharacterized LOC152286                                                              | -3.1030061 down | -2.150858 down  |
| SELV         | NM_182704    | selenoprotein V                                                                        | -3.1896558 down | -4.503737 down  |
|              |              |                                                                                        | -2.7777936 down | -2.3124392 down |
| LRRC48       | NM_031294    | leucine rich repeat containing 48                                                      | -5.1789722 down | -3.5324757 down |
| CADPS        | NM_183393    | Ca <sup>++</sup> -dependent secretion activator                                        | -2.484442 down  | -2.1044981 down |
|              |              |                                                                                        | -3.1737974 down | -2.3382058 down |
|              |              |                                                                                        | -3.2957397 down | -4.4931135 down |
|              | AK000950     |                                                                                        | -7.552501 down  | -4.49499 down   |
| OR51L1       | NM_001004755 | olfactory receptor, family 51, subfamily L, member 1                                   | -2.1734262 down | -2.3236735 down |
| IAPP         | NM_000415    | islet amyloid polypeptide                                                              | -2.0420742 down | -2.7572558 down |
| TPO          | NM_175721    | thyroid peroxidase                                                                     | -2.3773062 down | -2.2086618 down |
| ILDR1        | NM_001199799 | immunoglobulin-like domain containing receptor 1                                       | -8.349081 down  | -3.69501 down   |
| PPP1R12B     | NM_001167858 | protein phosphatase 1, regulatory subunit 12B                                          | -5.0467706 down | -2.428456 down  |
| POM121L4P    | NR_024592    | POM121 transmembrane nucleoporin-like 4 pseudogene                                     | -4.1517305 down | -6.7370973 down |
|              |              |                                                                                        | -7.83493 down   | -3.391712 down  |
| ALPK3        | NM_020778    | alpha-kinase 3                                                                         | -2.720958 down  | -3.1536317 down |
| HOXD12       | NM_021193    | homeobox D12                                                                           | -4.8989153 down | -3.730177 down  |
| SLC22A24     | NM_001136506 | solute carrier family 22, member 24                                                    | -3.0037184 down | -2.218759 down  |
| CLEC4M       | NM_001144911 | C-type lectin domain family 4, member M                                                | -7.802538 down  | -3.3323767 down |
| PLXDC1       | NM_020405    | plexin domain containing 1                                                             | -2.7237802 down | -2.8136203 down |
| MMP2         | NM_004530    | matrix metalloproteinase 2 (gelatinase A, 72kDa gelatinase, 72kDa type IV collagenase) | -3.1940796 down | -3.0168788 down |
| NUMBL        | AK096566     | numb homolog (Drosophila)-like                                                         | -4.5448823 down | -2.4770176 down |
| RHO          | NM_000539    | rhodopsin                                                                              | -2.9424348 down | -2.0070555 down |
|              |              |                                                                                        | -2.2462947 down | -2.1946433 down |
| LOC100128851 | AK127423     | uncharacterized LOC100128851                                                           | -2.8426902 down | -3.5658264 down |
| LYPD4        | XM_005278383 | LY6/PLAUR domain containing 4                                                          | -3.141229 down  | -2.368074 down  |
| XLOC_013472  |              |                                                                                        | -2.740107 down  | -3.4043262 down |
| SIM1         | NM_005068    | single-minded family bHLH transcription factor 1                                       | -4.73623 down   | -3.516522 down  |
| ERBB4        | NM_005235    | v-erb-b2 avian erythroblastic leukemia viral oncogene homolog 4                        | -2.403767 down  | -3.0228953 down |

|              |              |                                                                    |                 |                 |
|--------------|--------------|--------------------------------------------------------------------|-----------------|-----------------|
| TTC39A       | AB007921     | tetratricopeptide repeat domain 39A                                | -5.586702 down  | -4.0860405 down |
| SSC5D        | NM_001144950 | scavenger receptor cysteine rich domain containing (5 domains)     | -3.5083632 down | -3.9298322 down |
| TPTEP1       |              | transmembrane phosphatase with tensin homology pseudogene 1        | -2.0719025 down | -2.7495475 down |
| C21orf62     | NM_019596    | chromosome 21 open reading frame 62                                | -5.5728498 down | -2.1346862 down |
| YY2          | NM_206923    | YY2 transcription factor                                           | -2.4237745 down | -2.2702794 down |
| SH2D4B       | NM_207372    | SH2 domain containing 4B                                           | -3.6573117 down | -2.745018 down  |
| KLK3         |              | kallikrein-related peptidase 3                                     | -3.4170883 down | -2.143373 down  |
| FAM95B1      |              | family with sequence similarity 95, member B1                      | -3.3449035 down | -3.9587147 down |
| SPATA31C2    | NM_001166137 | SPATA31 subfamily C, member 2                                      | -3.175988 down  | -2.1441925 down |
| WDR6         | NM_018031    | WD repeat domain 6                                                 | -4.9029975 down | -2.105384 down  |
| VTCN1        | NM_024626    | V-set domain containing T cell activation inhibitor 1              | -3.4563015 down | -3.2026353 down |
|              | DA380926     |                                                                    | -3.4809265 down | -2.519322 down  |
| FZD10        | NM_007197    | frizzled family receptor 10                                        | -5.650798 down  | -2.8633425 down |
| RSP01        | NM_001038633 | R-spondin 1                                                        | -3.1928272 down | -2.1467643 down |
| PBOV1        | NM_021635    | prostate and breast cancer overexpressed 1                         | -2.5024793 down | -2.2965157 down |
| DLL4         | NM_019074    | delta-like 4 (Drosophila)                                          | -3.575623 down  | -2.8565507 down |
| TBX15        | XM_005271161 | T-box 15                                                           | -2.9784076 down | -2.6120486 down |
|              |              |                                                                    | -3.6806834 down | -2.572243 down  |
|              |              |                                                                    | -3.340373 down  | -2.323868 down  |
|              |              |                                                                    | -2.8262095 down | -2.0393913 down |
| STXBP1       | NM_003165    | syntaxin binding protein 1                                         | -5.8065495 down | -11.575024 down |
| PRSS35       | NM_153362    | protease, serine, 35                                               | -4.6289682 down | -3.7475495 down |
| ARMC4        | NM_018076    | armadillo repeat containing 4                                      | -3.9101305 down | -2.4722443 down |
| GPHA2        | NM_130769    | glycoprotein hormone alpha 2                                       | -2.4099991 down | -2.9351585 down |
|              | DQ323997     |                                                                    | -2.2424254 down | -3.025131 down  |
| XLOC_014512  |              |                                                                    | -2.581114 down  | -2.9747903 down |
| C11orf39     | AK127362     | chromosome 11 open reading frame 39                                | -2.8149347 down | -2.5082736 down |
| C9orf53      | NR_024274    | chromosome 9 open reading frame 53                                 | -2.0028186 down | -2.208523 down  |
| LOC390705    |              | protein phosphatase 2, regulatory subunit B", beta pseudogene      | -5.679186 down  | -3.3711836 down |
| FAM115A      | NM_014719    | family with sequence similarity 115, member A                      | -2.7608933 down | -2.575283 down  |
| LOC100130027 | XR_250425    | uncharacterized LOC100130027                                       | -3.599427 down  | -2.3434985 down |
| GPR143       | NM_000273    | G protein-coupled receptor 143                                     | -2.0673742 down | -2.0001326 down |
|              |              |                                                                    | -2.1234512 down | -2.7141237 down |
| FFAR4        | NM_181745    | free fatty acid receptor 4                                         | -2.6581173 down | -3.5376074 down |
| CCL20        | NM_004591    | chemokine (C-C motif) ligand 20                                    | -3.3799648 down | -5.3729663 down |
| ARHGAP29     | NM_004815    | Rho GTPase activating protein 29                                   | -5.012964 down  | -2.3029828 down |
| LCE3A        | NM_178431    | late cornified envelope 3A                                         | -4.960309 down  | -4.215301 down  |
| XLOC_005985  |              |                                                                    | -4.1495547 down | -2.4659622 down |
| LINC00469    | NR_027146    | long intergenic non-protein coding RNA 469                         | -2.3934133 down | -3.5327144 down |
| PDZD2        | XM_005248269 | PDZ domain containing 2                                            | -4.299657 down  | -2.0075896 down |
|              | AX721312     |                                                                    | -2.8196726 down | -2.0176792 down |
| GHRH         | NM_021081    | growth hormone releasing hormone                                   | -2.2639303 down | -2.4451466 down |
| FLJ44881     | BC119774     | FLJ44881                                                           | -2.2183788 down | -2.81897 down   |
|              | AK026312     |                                                                    | -2.1538436 down | -3.3416808 down |
|              |              |                                                                    | -4.838314 down  | -3.2798095 down |
|              |              |                                                                    | -4.710228 down  | -2.6721013 down |
|              |              |                                                                    | -4.021721 down  | -3.3218708 down |
| FLJ42102     |              | uncharacterized LOC399923                                          | -3.9866443 down | -3.0024512 down |
|              | BE468260     |                                                                    | -4.7367983 down | -2.5129466 down |
|              |              |                                                                    | -2.217405 down  | -2.3224392 down |
| GDF5         | NM_000557    | growth differentiation factor 5                                    | -2.519642 down  | -2.5101643 down |
|              |              |                                                                    | -3.1182075 down | -5.8776093 down |
| SARDH        | NM_007101    | sarcosine dehydrogenase                                            | -2.5900073 down | -2.4933617 down |
|              |              |                                                                    | -2.8365214 down | -2.2153018 down |
| KIF21B       | NM_001252102 | kinesin family member 21B                                          | -2.734255 down  | -2.2452161 down |
| TRPV1        | NM_080706    | transient receptor potential cation channel, subfamily V, member 1 | -3.4843838 down | -4.1230664 down |
|              |              |                                                                    | -3.2270882 down | -3.051634 down  |
| POLM         | AK092801     | polymerase (DNA directed), mu                                      | -4.4273906 down | -6.1459208 down |
| PGF          | NM_002632    | placental growth factor                                            | -2.7537487 down | -4.1989174 down |
| HOGA1        | AK094791     | 4-hydroxy-2-oxoglutarate aldolase 1                                | -4.9284415 down | -2.9133787 down |

|              |              |                                                             |                 |                 |
|--------------|--------------|-------------------------------------------------------------|-----------------|-----------------|
|              | BX350880     |                                                             | -5.1892653 down | -3.5348084 down |
| FARP2        | NM_014808    | FERM, RhoGEF and pleckstrin domain protein 2                | -2.578871 down  | -3.1892345 down |
| OR4C13       | NM_001001955 | olfactory receptor, family 4, subfamily C, member 13        | -4.78674 down   | -2.7805126 down |
| RPRM         | NM_019845    | reprimo, TP53 dependent G2 arrest mediator candidate        | -4.356147 down  | -3.009193 down  |
| C17orf104    | NM_001145080 | chromosome 17 open reading frame 104                        | -3.279685 down  | -2.2853482 down |
| C1orf110     | XM_005245126 | chromosome 1 open reading frame 110                         | -6.8540196 down | -2.212149 down  |
| C11orf91     | NM_001166692 | chromosome 11 open reading frame 91                         | -3.4042659 down | -3.2158985 down |
| LINC00112    |              | long intergenic non-protein coding RNA 112                  | -6.3439503 down | -3.696973 down  |
| RAB3C        | NM_138453    | RAB3C, member RAS oncogene family                           | -2.401721 down  | -2.6397803 down |
| SLC26A1      | NM_022042    | solute carrier family 26 (anion exchanger), member 1        | -4.0565376 down | -2.140201 down  |
|              |              |                                                             | -4.2524214 down | -4.1089587 down |
| PRRG3        |              | proline rich Gla (G-carboxyglutamic acid) 3 (transmembrane) | -4.379238 down  | -4.0721474 down |
| LOC440518    | NR_033899    | golgin A2 pseudogene                                        | -2.174021 down  | -2.8164687 down |
| RAET1E       | NM_139165    | retinoic acid early transcript 1E                           | -3.5835888 down | -2.6243067 down |
|              |              |                                                             | -2.762051 down  | -2.1660411 down |
|              |              |                                                             | -6.106518 down  | -3.950393 down  |
| CLIC5        | NM_016929    | chloride intracellular channel 5                            | -2.3120713 down | -2.813209 down  |
| PCDH8        | NM_002590    | protocadherin 8                                             | -4.5068326 down | -2.3611255 down |
|              | XR_252185    |                                                             | -4.242264 down  | -5.463425 down  |
| CCDC13-AS1   | XR_245087    | CCDC13 antisense RNA 1                                      | -4.3199215 down | -2.1194508 down |
|              | BC069683     |                                                             | -3.6916153 down | -3.0403626 down |
|              |              |                                                             | -5.2074895 down | -2.120838 down  |
| SLC19A3      |              | solute carrier family 19 (thiamine transporter), member 3   | -4.854747 down  | -2.89024 down   |
| MYCT1        | NM_025107    | myc target 1                                                | -2.9153717 down | -3.1453035 down |
| LINC00656    |              | long intergenic non-protein coding RNA 656                  | -2.3716185 down | -2.534903 down  |
| AK4          | NM_001005353 | adenylate kinase 4                                          | -4.4906936 down | -4.0319743 down |
| XLOC_014512  |              |                                                             | -3.80788 down   | -2.2034023 down |
| RTN4RL1      | NM_178568    | reticulin 4 receptor-like 1                                 | -2.713394 down  | -2.4262722 down |
| SEPN1        | NM_020451    | selenoprotein N, 1                                          | -2.4997265 down | -2.6878133 down |
| RBMY1B       | NM_001006121 | RNA binding motif protein, Y-linked, family 1, member B     | -2.3554819 down | -2.2463882 down |
|              |              |                                                             | -7.0104017 down | -5.8662295 down |
|              |              |                                                             | -2.2990892 down | -2.0807428 down |
|              |              |                                                             | -3.154178 down  | -3.1178367 down |
|              | XM_005276061 |                                                             | -3.4237015 down | -3.155046 down  |
| LOC100130442 | AK131364     | uncharacterized LOC100130442                                | -5.190087 down  | -4.7179313 down |
| L2HGDH       | NM_024884    | L-2-hydroxyglutarate dehydrogenase                          | -4.540999 down  | -3.6938467 down |
|              |              |                                                             | -3.6504707 down | -3.3330872 down |
| MUC12        | NM_001164462 | mucin 12, cell surface associated                           | -4.1237965 down | -2.31573 down   |
| LUZP4        | NM_016383    | leucine zipper protein 4                                    | -3.0300114 down | -2.3685749 down |
|              | DA825750     |                                                             | -4.3914485 down | -2.1884382 down |
| ABHD12B      | NM_001206673 | abhydrolase domain containing 12B                           | -2.6606398 down | -2.2948968 down |
| C7           | NM_000587    | complement component 7                                      | -4.9730897 down | -4.3760676 down |
|              |              |                                                             | -3.6345408 down | -2.1417725 down |
|              |              |                                                             | -3.1546032 down | -2.1340694 down |
| MAGEB16      | NM_001099921 | melanoma antigen family B, 16                               | -10.212704 down | -3.1281996 down |
| LINC00298    |              | long intergenic non-protein coding RNA 298                  | -3.4533699 down | -3.0976439 down |
| TERF1        | AK128828     | telomeric repeat binding factor (NIMA-interacting) 1        | -3.042686 down  | -2.939499 down  |
| CRHR1        | AK124894     | corticotropin releasing hormone receptor 1                  | -4.5187407 down | -2.3067143 down |
| FLJ32955     |              | uncharacterized protein FLJ32955                            | -2.799315 down  | -2.436399 down  |
|              | AK127494     |                                                             | -2.3571315 down | -2.2153118 down |
| C8orf66      | AL834492     | chromosome 8 open reading frame 66                          | -5.2120147 down | -5.335049 down  |
| GGNBP1       | NR_028361    | gametogenetin binding protein 1 (pseudogene)                | -2.5650973 down | -2.296233 down  |
| FLJ45482     | AK127393     | uncharacterized LOC645566                                   | -7.6402583 down | -5.4473696 down |
| ZNF221       | NM_013359    | zinc finger protein 221                                     | -3.153823 down  | -2.2103717 down |
| RIBC1        | NM_144968    | RIB43A domain with coiled-coils 1                           | -3.9644072 down | -2.9950383 down |
| CNTN6        | NM_014461    | contactin 6                                                 | -3.1018984 down | -2.5210204 down |
|              |              |                                                             | -2.4810603 down | -2.5062912 down |
| CALML6       | NM_138705    | calmodulin-like 6                                           | -3.336499 down  | -2.3114624 down |
| APOC4        | NM_001646    | apolipoprotein C-IV                                         | -2.4776707 down | -2.2767167 down |
| OR13H1       | NM_001004486 | olfactory receptor, family 13, subfamily H, member 1        | -2.3443534 down | -2.2315154 down |
|              | XR_242443    |                                                             | -3.4162261 down | -2.558823 down  |
| LRRC3B       | NM_052953    | leucine rich repeat containing 3B                           | -2.6797447 down | -2.304273 down  |

|              |              |                                                                                      |                  |                 |
|--------------|--------------|--------------------------------------------------------------------------------------|------------------|-----------------|
| IGSF11       | NM_152538    | immunoglobulin superfamily, member 11                                                | -2.2304337 down  | -2.044415 down  |
| LOC442122    | AK128759     | uncharacterized LOC442122                                                            | -2.4087815 down  | -3.912592 down  |
| ZFXH2        | NM_033400    | zinc finger homeobox 2                                                               | -3.499969 down   | -2.0057359 down |
| SNX29        | BC029857     | sorting nexin 29                                                                     | -3.4163837 down  | -2.550967 down  |
| TAF7L        | NM_024885    | TAF7-like RNA polymerase II, TATA box binding protein (TBP)-associated factor, 50kDa | -3.3501267 down  | -4.237088 down  |
| LOC100130219 | BC039168     | uncharacterized LOC100130219                                                         | -3.1230786 down  | -2.995904 down  |
| C11orf94     | NM_001080446 | chromosome 11 open reading frame 94                                                  | -2.98685 down    | -2.2475994 down |
| LOC100128644 | AY358240     | LMNE6487                                                                             | -2.9948626 down  | -2.3389635 down |
| LINC01020    | NR_026994    | long intergenic non-protein coding RNA 1020                                          | -4.014717 down   | -2.321115 down  |
| SLC22A7      | NM_153320    | solute carrier family 22 (organic anion transporter), member 7                       | -4.0024796 down  | -2.5640233 down |
| DCN          | NM_001920    | decorin                                                                              | -2.5660083 down  | -2.601472 down  |
| XLOC_004837  |              |                                                                                      | -5.287984 down   | -2.8931408 down |
| LOC400682    | XM_003846486 | zinc finger protein 100-like                                                         | -3.8529625 down  | -3.1319497 down |
|              | AK057937     |                                                                                      | -5.594234 down   | -3.1844053 down |
| LAMA3        | BC093406     | laminin, alpha 3                                                                     | -3.9153767 down  | -2.5552838 down |
| RLIM         | NM_183353    | ring finger protein, LIM domain interacting                                          | -3.060859 down   | -2.0225472 down |
| TBXA2R       | NM_001060    | thromboxane A2 receptor                                                              | -3.645117 down   | -2.2187736 down |
| ZNRF3        | NM_001206998 | zinc and ring finger 3                                                               | -6.217153 down   | -4.799175 down  |
|              | BC094703     |                                                                                      | -2.2877982 down  | -2.0489757 down |
| ST8SIA6-AS1  | AK127982     | ST8SIA6 antisense RNA 1                                                              | -3.586174 down   | -2.0305517 down |
| MYOZ3        | NM_133371    | myozenin 3                                                                           | -3.4981747 down  | -3.1188323 down |
|              |              |                                                                                      | -2.7736974 down  | -2.9971247 down |
|              |              |                                                                                      | -3.0250106 down  | -2.0324469 down |
| EPM2A        | NM_001018041 | epilepsy, progressive myoclonus type 2A, Lafora disease (laforin)                    | -2.6596923 down  | -2.4355779 down |
| ZNF365       | NM_199451    | zinc finger protein 365                                                              | -9.490078 down   | -3.8610733 down |
|              |              |                                                                                      | -5.0509114 down  | -2.2933345 down |
| PSG10P       | L14723       | pregnancy specific beta-1-glycoprotein 10, pseudogene                                | -4.9226646 down  | -5.8618336 down |
| PCDH10       | NM_032961    | protocadherin 10                                                                     | -3.8108032 down  | -2.4410305 down |
| OTOG         |              | otogelin                                                                             | -2.6265247 down  | -2.0625606 down |
| BCOR         |              | BCL6 corepressor                                                                     | -3.6131258 down  | -2.0180728 down |
| LOC100130433 | AK096255     | uncharacterized LOC100130433                                                         | -6.477724 down   | -2.5512693 down |
|              |              |                                                                                      | -11.2422495 down | -7.8933845 down |
| DUOXA2       | BX537581     | dual oxidase maturation factor 2                                                     | -3.2095342 down  | -2.217342 down  |
|              |              |                                                                                      | -7.351093 down   | -3.0303755 down |
| PKD2L1       | NM_001253837 | polycystic kidney disease 2-like 1                                                   | -2.2718992 down  | -2.9406118 down |
| OR2A5        | NM_012365    | olfactory receptor, family 2, subfamily A, member 5                                  | -4.145408 down   | -3.9019973 down |
| IVL          | NM_005547    | involucrin                                                                           | -3.2350159 down  | -3.6366699 down |
| C18orf15     | AK055900     | chromosome 18 open reading frame 15                                                  | -2.8002374 down  | -4.244676 down  |
| ATP2A1       | NM_173201    | ATPase, Ca++ transporting, cardiac muscle, fast twitch 1                             | -2.146978 down   | -2.6509368 down |
| C10orf67     | NM_153714    | chromosome 10 open reading frame 67                                                  | -2.6981645 down  | -2.49525 down   |
|              | DA292495     |                                                                                      | -3.3290203 down  | -4.4575987 down |
| KLF17        | NM_173484    | Kruppel-like factor 17                                                               | -5.9575186 down  | -2.9071062 down |
|              |              |                                                                                      | -2.7443027 down  | -2.0764837 down |
| LINC00471    | NR_024079    | long intergenic non-protein coding RNA 471                                           | -2.6475132 down  | -2.558882 down  |
| SRRM2        | NM_016333    | serine/arginine repetitive matrix 2                                                  | -2.7734127 down  | -2.4846544 down |
| HIC2         | NM_015094    | hypermethylated in cancer 2                                                          | -2.6893122 down  | -3.6411602 down |
| ARHGEF25     | NM_182947    | Rho guanine nucleotide exchange factor (GEF) 25                                      | -4.45104 down    | -2.2068572 down |
| ACVR2B-AS1   | NR_028389    | ACVR2B antisense RNA 1                                                               | -2.1485991 down  | -2.6750498 down |
| CENPM        | NM_001002876 | centromere protein M                                                                 | -2.6285555 down  | -3.0034392 down |
|              | AK126822     |                                                                                      | -3.216857 down   | -2.144103 down  |
| LOC100127974 | AK096395     | uncharacterized LOC100127974                                                         | -2.5793755 down  | -2.3793402 down |
| SNAR-A3      | NR_024214    | small ILF3/NF90-associated RNA A3                                                    | -3.394051 down   | -2.610968 down  |
| ARTN         | NM_057090    | artemin                                                                              | -3.0175884 down  | -2.9977477 down |
| DRAXIN       | NM_198545    | dorsal inhibitory axon guidance protein                                              | -5.2025223 down  | -4.297741 down  |
| GOLGA8I      | NR_024074    | golgin A8 family, member I                                                           | -2.3765383 down  | -2.3570118 down |
| KERA         | NM_007035    | keratocan                                                                            | -6.805399 down   | -2.166617 down  |
| CCDC18       | NM_206886    | coiled-coil domain containing 18                                                     | -2.667565 down   | -2.0145316 down |
|              |              |                                                                                      | -5.041713 down   | -5.5404215 down |
| TREM2        | NM_018965    | triggering receptor expressed on myeloid cells 2                                     | -3.880465 down   | -2.5101337 down |
| OR51V1       | NM_001004760 | olfactory receptor, family 51, subfamily V, member 1                                 | -5.2598615 down  | -3.1856377 down |



|              |              |                                                                            |                 |                 |
|--------------|--------------|----------------------------------------------------------------------------|-----------------|-----------------|
| CSPG4P8      | NR_033579    | chondroitin sulfate proteoglycan 4 pseudogene 8                            | -3.605421 down  | -2.7088027 down |
| SRGAP1       | NM_020762    | SLIT-ROBO Rho GTPase activating protein 1                                  | -3.2719216 down | -5.9805984 down |
| LOC100128184 | AK128032     | uncharacterized LOC100128184                                               | -2.6046724 down | -3.726653 down  |
| SPATA31E1    | NM_178828    | SPATA31 subfamily E, member 1                                              | -2.5855255 down | -3.0858095 down |
| PAQR9        | NM_198504    | progesterin and adipoQ receptor family member IX                           | -4.246932 down  | -2.3362849 down |
|              | BC137370     |                                                                            | -2.8928747 down | -3.0560966 down |
|              |              |                                                                            | -3.5755098 down | -3.1110375 down |
| C12orf42     | NR_103526    | chromosome 12 open reading frame 42                                        | -2.9332204 down | -2.0324252 down |
| OR2Z1        | NM_001004699 | olfactory receptor, family 2, subfamily Z, member 1                        | -7.3849187 down | -4.651697 down  |
| KRTAP5-7     | NM_001012503 | keratin associated protein 5-7                                             | -4.1390243 down | -3.689695 down  |
| AKR1C1       |              | aldo-keto reductase family 1, member C1                                    | -2.3489442 down | -2.9251955 down |
| KIAA1804     | NM_032435    | mixed lineage kinase 4                                                     | -2.1933222 down | -3.1814885 down |
|              |              |                                                                            | -3.1517398 down | -3.0949423 down |
| PRSS37       | NM_001008270 | protease, serine, 37                                                       | -3.6511247 down | -2.7350087 down |
| IL19         | NM_153758    | interleukin 19                                                             | -2.3829544 down | -2.0626311 down |
| MS4A4E       | XM_005274415 | membrane-spanning 4-domains, subfamily A, member 4E                        | -4.7889643 down | -2.944113 down  |
| HNF1A        | X71347       | HNF1 homeobox A                                                            | -4.2920446 down | -9.948551 down  |
| PRDM5        | NM_018699    | PR domain containing 5                                                     | -2.4535525 down | -2.291478 down  |
| FGL1         | NM_201553    | fibrinogen-like 1                                                          | -3.2281563 down | -3.7432191 down |
| ACBD7        | NM_001039844 | acyl-CoA binding domain containing 7                                       | -4.7633204 down | -3.5007224 down |
| OR7E91P      |              | olfactory receptor, family 7, subfamily E, member 91 pseudogene            | -2.2479303 down | -2.177752 down  |
| LOC101930277 | XM_005276001 | putative speedy protein-like protein LOC442572-like                        | -2.3543677 down | -3.9875796 down |
|              |              |                                                                            | -4.580545 down  | -3.7671514 down |
|              | DW451783     |                                                                            | -2.31998 down   | -3.93076 down   |
|              |              |                                                                            | -3.0771558 down | -2.5405533 down |
| SLC12A1      | NM_000338    | solute carrier family 12 (sodium/potassium/chloride transporter), member 1 | -2.9304106 down | -2.1636744 down |
|              |              |                                                                            | -2.7537467 down | -4.634769 down  |
|              |              |                                                                            | -11.223335 down | -5.431114 down  |
|              |              |                                                                            | -3.9416976 down | -4.826088 down  |
| SYTL4        | AL832596     | synaptotagmin-like 4                                                       | -7.2147017 down | -3.0938442 down |
| TRIM66       | NM_014818    | tripartite motif containing 66                                             | -2.8489277 down | -2.0310817 down |
| TSSK6        | NM_032037    | testis-specific serine kinase 6                                            | -2.6091082 down | -3.1816342 down |
| MGC45800     | NR_027107    | uncharacterized LOC90768                                                   | -3.9954557 down | -2.265468 down  |
| GPX3         | NM_002084    | glutathione peroxidase 3 (plasma)                                          | -8.080547 down  | -26.24971 down  |
|              |              |                                                                            | -3.0391965 down | -2.26418 down   |
|              | XM_005262351 |                                                                            | -3.0273724 down | -2.187194 down  |
| PGF          | AK023843     | placental growth factor                                                    | -2.0445035 down | -3.2633703 down |
| GNG4         | NM_001098722 | guanine nucleotide binding protein (G protein), gamma 4                    | -4.072524 down  | -2.2099357 down |
| WT1-AS       | NR_023920    | WT1 antisense RNA                                                          | -4.723758 down  | -2.638942 down  |
|              | AK095662     |                                                                            | -4.8174334 down | -3.7249205 down |
| THRSP        | NM_003251    | thyroid hormone responsive                                                 | -9.411306 down  | -2.5471523 down |
| NPY5R        | NM_006174    | neuropeptide Y receptor Y5                                                 | -2.752537 down  | -2.4194074 down |
| LINC00994    |              | long intergenic non-protein coding RNA 994                                 | -2.2048903 down | -2.8703406 down |
|              |              |                                                                            | -3.8704274 down | -2.5611365 down |
| KCNG1        | BC006367     | potassium voltage-gated channel, subfamily G, member 1                     | -3.8978465 down | -2.251751 down  |
| ADRA2B       | NM_000682    | adrenoceptor alpha 2B                                                      | -3.3958566 down | -2.0081847 down |
| ANKRD36B     | NM_025190    | ankyrin repeat domain 36B                                                  | -4.0414047 down | -2.42802 down   |
|              | AK097428     |                                                                            | -2.9957068 down | -2.2840698 down |
|              |              |                                                                            | -8.298018 down  | -8.08274 down   |
| DDC          | NM_001242890 | dopa decarboxylase (aromatic L-amino acid decarboxylase)                   | -4.1380014 down | -2.8398564 down |
| LINC00862    | NR_040064    | long intergenic non-protein coding RNA 862                                 | -3.6854162 down | -3.9664595 down |
|              |              |                                                                            | -8.106635 down  | -4.1982193 down |
|              |              |                                                                            | -3.607722 down  | -5.6128917 down |
| FAM222A      | NM_032829    | family with sequence similarity 222, member A                              | -2.377456 down  | -2.464742 down  |
| MGC24103     | BC020879     | uncharacterized MGC24103                                                   | -3.3975537 down | -3.5006068 down |
| GIGYF2       |              | GRB10 interacting GYF protein 2                                            | -6.8904552 down | -2.1976812 down |
| CNTFR-AS1    | NR_024369    | CNTFR antisense RNA 1                                                      | -4.012094 down  | -2.0007253 down |
|              |              |                                                                            | -3.3043 down    | -2.2938197 down |
|              |              |                                                                            | -7.126149 down  | -3.697126 down  |
| CRHR1        | NM_001256299 | corticotropin releasing hormone receptor 1                                 | -2.9646633 down | -3.3979523 down |

|              |              |                                                                                                   |                 |                 |
|--------------|--------------|---------------------------------------------------------------------------------------------------|-----------------|-----------------|
| ADCK3        | XM_005273202 | aarF domain containing kinase 3                                                                   | -2.765031 down  | -2.3748455 down |
| M1AP         | NM_001281295 | meiosis 1 associated protein                                                                      | -4.565583 down  | -5.0430565 down |
| SMIM17       |              | small integral membrane protein 17                                                                | -7.0270543 down | -3.9596071 down |
| GRM4         | NM_000841    | glutamate receptor, metabotropic 4                                                                | -4.9132304 down | -3.4541683 down |
| CNBD1        | NM_173538    | cyclic nucleotide binding domain containing 1                                                     | -2.362943 down  | -2.9723847 down |
| MFSD2B       | NM_001080473 | major facilitator superfamily domain containing 2B                                                | -2.8333333 down | -2.5988963 down |
|              |              |                                                                                                   | -5.6871257 down | -3.6310484 down |
| FAM95B1      | NR_026759    | family with sequence similarity 95, member B1                                                     | -2.4547598 down | -6.888975 down  |
| FOXL1        | NM_005250    | forkhead box L1                                                                                   | -2.908986 down  | -2.4489553 down |
| ASS1         | NM_000050    | argininosuccinate synthase 1                                                                      | -2.0016015 down | -4.2798576 down |
| MSTO1        | BC070067     | misato 1, mitochondrial distribution and morphology regulator                                     | -4.7585 down    | -3.1386647 down |
|              |              |                                                                                                   | -6.852509 down  | -8.059803 down  |
| PLAC9        |              | placenta-specific 9                                                                               | -2.2458434 down | -2.4713573 down |
| SMARCA1      | NM_003069    | SWI/SNF related, matrix associated, actin dependent regulator of chromatin, subfamily a, member 1 | -2.820417 down  | -2.0854108 down |
|              |              |                                                                                                   | -3.4437118 down | -2.085765 down  |
| SPACA6P      | NR_024330    | sperm acrosome associated 6, pseudogene                                                           | -2.147981 down  | -2.171319 down  |
| GABRB3       | NR_103801    | gamma-aminobutyric acid (GABA) A receptor, beta 3                                                 | -2.6119237 down | -2.5747182 down |
| LOC340335    | AK074459     | uncharacterized LOC340335                                                                         | -2.2451448 down | -2.6379824 down |
| BRD7         |              | bromodomain containing 7                                                                          | -5.857923 down  | -8.3824215 down |
|              |              |                                                                                                   | -4.160587 down  | -5.0996275 down |
| CETN1        | NM_004066    | centrin, EF-hand protein, 1                                                                       | -3.3830988 down | -2.6012702 down |
|              | AY358259     |                                                                                                   | -3.4036396 down | -2.1031651 down |
| LINC00612    | AK123808     | long intergenic non-protein coding RNA 612                                                        | -3.347819 down  | -2.3952613 down |
| CREG2        | NM_153836    | cellular repressor of E1A-stimulated genes 2                                                      | -2.2474577 down | -3.1792367 down |
| CPS1-IT1     | NR_002763    | CPS1 intronic transcript 1 (non-protein coding)                                                   | -4.651172 down  | -2.132304 down  |
|              |              |                                                                                                   | -2.8417528 down | -3.6120808 down |
|              |              |                                                                                                   | -4.688848 down  | -4.3502536 down |
| CROCCP2      |              | ciliary rootlet coiled-coil, rootletin pseudogene 2                                               | -2.5046911 down | -2.0799756 down |
| LOC648691    | NR_027426    | uncharacterized LOC648691                                                                         | -3.170918 down  | -2.7376802 down |
| LOC100129213 | NR_038419    | uncharacterized LOC100129213                                                                      | -5.7021146 down | -4.172857 down  |
|              |              |                                                                                                   | -2.2922685 down | -2.5002108 down |
| GCNT7        | NM_080615    | glucosaminyl (N-acetyl) transferase family member 7                                               | -4.09372 down   | -2.0400364 down |
|              |              |                                                                                                   | -4.4009466 down | -2.563053 down  |
| FAM230C      | XR_246982    | family with sequence similarity 230, member C                                                     | -5.1188145 down | -3.6988819 down |
| LRRC37A3     | NM_199340    | leucine rich repeat containing 37, member A3                                                      | -2.4184704 down | -3.8955996 down |
| TEX40        | NM_001039496 | testis expressed 40                                                                               | -2.0131922 down | -2.8640788 down |
|              |              |                                                                                                   | -2.3689635 down | -2.521992 down  |
| CCNB3        | NM_033031    | cyclin B3                                                                                         | -2.3457255 down | -2.4409332 down |
|              |              |                                                                                                   | -7.226682 down  | -6.421004 down  |
| NPAP1        | NM_018958    | nuclear pore associated protein 1                                                                 | -3.0788836 down | -5.384669 down  |
| LOC284395    | NR_040029    | uncharacterized LOC284395                                                                         | -6.3845477 down | -3.5200908 down |
| MOBP         | NM_182935    | myelin-associated oligodendrocyte basic protein                                                   | -2.612194 down  | -2.4987159 down |
| RNF151       | NM_174903    | ring finger protein 151                                                                           | -10.789865 down | -6.9431434 down |
|              | DB321672     |                                                                                                   | -3.9226203 down | -5.995757 down  |
| XIRP1        | NM_194293    | xin actin-binding repeat containing 1                                                             | -2.5284197 down | -2.0768394 down |
| TRIM15       | NM_033229    | tripartite motif containing 15                                                                    | -2.9695067 down | -2.6229405 down |
|              | DB452078     |                                                                                                   | -8.392802 down  | -5.68079 down   |
| ATMIN        |              | ATM interactor                                                                                    | -2.5728643 down | -3.0260386 down |
| CHRD1        | NM_145234    | chordin-like 1                                                                                    | -7.965218 down  | -4.456384 down  |
| CIB4         | NM_001029881 | calcium and integrin binding family member 4                                                      | -2.6833458 down | -2.0584834 down |
|              | AF176921     |                                                                                                   | -3.7699955 down | -2.4161296 down |
| CAND1        | NM_018448    | cullin-associated and neddylation-dissociated 1                                                   | -2.1629581 down | -2.76554 down   |
| LOC728208    | AK055890     | uncharacterized LOC728208                                                                         | -2.373086 down  | -2.0081418 down |
| NWD1         | NM_001007525 | NACHT and WD repeat domain containing 1                                                           | -4.7681046 down | -2.9914217 down |
|              | XR_246457    |                                                                                                   | -3.7747784 down | -3.6855512 down |
| BMP8B        | NM_001720    | bone morphogenetic protein 8b                                                                     | -4.392157 down  | -3.4113386 down |
|              |              |                                                                                                   | -3.600906 down  | -2.8334656 down |
| C6orf132     | NM_001164446 | chromosome 6 open reading frame 132                                                               | -2.3015475 down | -2.0614069 down |
| IGF2-AS      | NR_028044    | IGF2 antisense RNA                                                                                | -2.4300961 down | -2.2078357 down |
|              |              |                                                                                                   | -3.8739939 down | -2.2797542 down |
| DLGAP1       | BC040718     | discs, large (Drosophila) homolog-associated protein 1                                            | -4.467252 down  | -2.4041307 down |
| IGLON5       | NM_001101372 | IgLON family member 5                                                                             | -4.6648974 down | -4.5871277 down |

|              |              |                                                                                   |                 |                 |
|--------------|--------------|-----------------------------------------------------------------------------------|-----------------|-----------------|
| CXorf36      | NM_176819    | chromosome X open reading frame 36                                                | -4.2681413 down | -3.6356258 down |
|              |              |                                                                                   | -6.3634233 down | -3.9116843 down |
|              |              |                                                                                   | -3.2045245 down | -4.4178777 down |
| LINC01060    |              | long intergenic non-protein coding RNA 1060                                       | -2.7237144 down | -2.3773453 down |
| ECM2         | NM_001197296 | extracellular matrix protein 2, female organ and adipocyte specific               | -3.7958162 down | -2.1066232 down |
| TMED7-TICAM2 | NM_001164469 | TMED7-TICAM2 readthrough                                                          | -2.6871846 down | -4.454804 down  |
| CCL13        | NM_005408    | chemokine (C-C motif) ligand 13                                                   | -2.5201604 down | -2.7365208 down |
| CNTN1        | NM_001256064 | contactin 1                                                                       | -3.4734068 down | -2.6254642 down |
| TMEM136      | NM_174926    | transmembrane protein 136                                                         | -5.311514 down  | -3.2309813 down |
| HES2         | NM_019089    | hes family bHLH transcription factor 2                                            | -3.4782894 down | -2.1838522 down |
| OR5M1        | NM_001004740 | olfactory receptor, family 5, subfamily M, member 1                               | -3.393951 down  | -2.0258088 down |
| LOC643669    | NM_001243212 | uncharacterized LOC643669                                                         | -4.8111906 down | -2.9784377 down |
|              |              |                                                                                   | -2.0588372 down | -2.2057874 down |
| NTM          | NM_001144058 | neurotrimin                                                                       | -2.9576633 down | -3.3258417 down |
|              | AK090395     |                                                                                   | -3.5862362 down | -2.8501523 down |
| ZNF735       | NM_001159524 | zinc finger protein 735                                                           | -2.1558645 down | -2.6174467 down |
|              |              |                                                                                   | -7.364551 down  | -3.1889184 down |
| CD276        | NM_001024736 | CD276 molecule                                                                    | -3.558426 down  | -3.9181426 down |
| KIR3DL3      | NM_153443    | killer cell immunoglobulin-like receptor, three domains, long cytoplasmic tail, 3 | -12.905526 down | -5.4592304 down |
| SLC52A1      | NM_017986    | solute carrier family 52 (riboflavin transporter), member                         | -2.6768174 down | -3.277146 down  |
| KCNK10       | NM_021161    | potassium channel, subfamily K, member 10                                         | -2.8726737 down | -3.266088 down  |
| LOC101059918 | NM_001282484 | golgin subfamily A member 8R-like                                                 | -3.9089081 down | -6.7563615 down |
| DNAH10OS     | AK127211     | dynein, axonemal, heavy chain 10 opposite strand                                  | -2.8059027 down | -2.3963795 down |
| HPN-AS1      | NR_024561    | HPN antisense RNA 1                                                               | -4.2889986 down | -3.4931052 down |
| FAM180B      | NM_001164379 | family with sequence similarity 180, member B                                     | -3.263672 down  | -3.0560126 down |
| SNTG1        |              | syntrophin, gamma 1                                                               | -3.6184735 down | -4.626544 down  |
| LOC400043    | NR_026656    | uncharacterized LOC400043                                                         | -2.574002 down  | -2.0180123 down |
| LOC100128437 | AK126077     | uncharacterized LOC100128437                                                      | -3.787349 down  | -3.705672 down  |
| ARHGAP42     | NM_152432    | Rho GTPase activating protein 42                                                  | -4.6884327 down | -5.0928216 down |
| TAF1B        |              | TATA box binding protein (TBP)-associated factor, RNA polymerase I, B, 63kDa      | -3.7659035 down | -2.3717206 down |
| LOC440047    | CN273640     | uncharacterized LOC440047                                                         | -5.813673 down  | -3.7307885 down |
| HIST2H3A     | NM_001005464 | histone cluster 2, H3a                                                            | -5.252526 down  | -4.079533 down  |
|              |              |                                                                                   | -3.1482422 down | -4.8730435 down |
|              |              |                                                                                   | -4.9207687 down | -3.8382444 down |
|              | AA489744     |                                                                                   | -4.0394135 down | -3.2260072 down |
| VAPB         | NM_004738    | VAMP (vesicle-associated membrane protein)-associated protein B and C             | -3.3189611 down | -2.6637015 down |
| C10orf112    | XM_003403619 | chromosome 10 open reading frame 112                                              | -9.1042795 down | -5.223857 down  |
|              | XR_243598    |                                                                                   | -2.7269614 down | -3.6086152 down |
| PDLIM2       | NM_176871    | PDZ and LIM domain 2 (mystique)                                                   | -2.8918436 down | -2.5667872 down |
| TACC2        | NM_206862    | transforming, acidic coiled-coil containing protein 2                             | -3.9553227 down | -2.6267865 down |
| SCXA         | NM_001008271 | scleraxis homolog A (mouse)                                                       | -2.3026268 down | -2.4852164 down |
| DLK2         | NM_206539    | delta-like 2 homolog (Drosophila)                                                 | -2.6934922 down | -2.4141169 down |
| RGMB         | NM_001012761 | repulsive guidance molecule family member b                                       | -2.54233 down   | -2.0258934 down |
| CCBL2        | NM_001008661 | cysteine conjugate-beta lyase 2                                                   | -3.892778 down  | -4.073024 down  |
| LOC645321    | XR_245489    | uncharacterized LOC645321                                                         | -6.129499 down  | -7.913347 down  |
|              |              |                                                                                   | -4.215071 down  | -2.8316476 down |
| ZNF556       | NM_024967    | zinc finger protein 556                                                           | -4.1390405 down | -4.8221555 down |
|              |              |                                                                                   | -7.0757327 down | -3.5852954 down |
| LOC400927    | NR_002821    | TPTE and PTEN homologous inositol lipid phosphatase pseudogene                    | -3.1335623 down | -2.7839723 down |
|              |              |                                                                                   | -4.7952833 down | -3.0954583 down |
| KRTAP4-8     | NM_031960    | keratin associated protein 4-8                                                    | -2.1826358 down | -2.6519606 down |
| LINC00371    | NR_102432    | long intergenic non-protein coding RNA 371                                        | -3.407904 down  | -2.1707833 down |
| LINC00671    | NR_027254    | long intergenic non-protein coding RNA 671                                        | -2.2122674 down | -2.6735916 down |
| DNAJC5B      | NM_033105    | DnaJ (Hsp40) homolog, subfamily C, member 5 beta                                  | -4.672535 down  | -2.5006452 down |
| BAGE         | NM_001187    | B melanoma antigen                                                                | -2.5002224 down | -2.2087772 down |
|              |              |                                                                                   | -2.190112 down  | -2.5467663 down |
| SPINK14      | NM_001001325 | serine peptidase inhibitor, Kazal type 14 (putative)                              | -2.410096 down  | -2.6004455 down |
| LOC442122    | AK128759     | uncharacterized LOC442122                                                         | -2.7732742 down | -3.5038638 down |
| OR5H1        | NM_001005338 | olfactory receptor, family 5, subfamily H, member 1                               | -2.4639056 down | -3.2964878 down |
| TBC1D26      |              | TBC1 domain family, member 26                                                     | -4.6548347 down | -2.5070555 down |

|               |              |                                                                                           |                  |                 |
|---------------|--------------|-------------------------------------------------------------------------------------------|------------------|-----------------|
| OR51M1        | NM_001004756 | olfactory receptor, family 51, subfamily M, member 1                                      | -6.921062 down   | -2.374214 down  |
| PTGR2         | NM_152444    | prostaglandin reductase 2                                                                 | -6.3909965 down  | -8.441116 down  |
| LOC100506514  | AK124637     | uncharacterized LOC100506514                                                              | -10.0932045 down | -5.316796 down  |
|               |              |                                                                                           | -2.2071943 down  | -4.2262087 down |
| EFR3B         | AB023170     | EFR3 homolog B ( <i>S. cerevisiae</i> )                                                   | -2.170626 down   | -5.4527555 down |
|               |              |                                                                                           | -2.93619 down    | -2.6616418 down |
| ANKRD19P      | AK292218     | ankyrin repeat domain 19, pseudogene                                                      | -4.0869055 down  | -2.4562414 down |
|               | BX404796     |                                                                                           | -8.677917 down   | -6.1796365 down |
| EBF2          | NM_022659    | early B-cell factor 2                                                                     | -3.2187676 down  | -4.952757 down  |
|               |              |                                                                                           | -2.0403483 down  | -2.0120137 down |
|               |              |                                                                                           | -5.1649723 down  | -4.454665 down  |
| LINC00312     | NR_024065    | long intergenic non-protein coding RNA 312                                                | -2.5148447 down  | -2.5898385 down |
|               |              |                                                                                           | -2.3364172 down  | -3.0176022 down |
|               | AK124642     |                                                                                           | -2.5255454 down  | -2.088488 down  |
| KRT18P55      | NR_028334    | keratin 18 pseudogene 55                                                                  | -2.5229087 down  | -3.00817 down   |
| ZNF503-AS1    | NR_038223    | ZNF503 antisense RNA 1                                                                    | -5.666863 down   | -3.3589785 down |
| LOC100130849  |              | phosphorylase kinase, gamma 1 (muscle) pseudogene                                         | -2.5456324 down  | -2.6875086 down |
| ZDHHC11       | NM_024786    | zinc finger, DHHC-type containing 11                                                      | -2.9321234 down  | -2.5308278 down |
| RABL2B        | BC020495     | RAB, member of RAS oncogene family-like 2B                                                | -5.261373 down   | -3.8184621 down |
|               | DB153536     |                                                                                           | -2.2824883 down  | -2.5775142 down |
| ADAMTSL4-AS1  | AK127688     | ADAMTSL4 antisense RNA 1                                                                  | -4.0250177 down  | -4.0490417 down |
| AADAACL3      | NM_001103170 | arylacetamide deacetylase-like 3                                                          | -7.033656 down   | -4.7020364 down |
| REXO1L2P      | NR_003594    | REX1, RNA exonuclease 1 homolog ( <i>S. cerevisiae</i> )-like 2 (pseudogene)              | -3.4867666 down  | -3.3646264 down |
| TRIM61        | NM_001012414 | tripartite motif containing 61                                                            | -3.1146066 down  | -2.6063843 down |
|               | XR_243187    |                                                                                           | -4.0085664 down  | -2.9335191 down |
| RBM43         | NM_198557    | RNA binding motif protein 43                                                              | -2.7332804 down  | -2.1906834 down |
| LOC284379     |              | solute carrier family 7 (cationic amino acid transporter, y+ system), member 3 pseudogene | -2.574183 down   | -2.6562598 down |
|               | XM_005244923 |                                                                                           | -3.68567 down    | -2.043585 down  |
| LOC100996291  | NR_073178    | uncharacterized LOC100996291                                                              | -2.192945 down   | -2.3191981 down |
|               |              |                                                                                           | -4.8397064 down  | -9.558157 down  |
| CCL25         | NM_005624    | chemokine (C-C motif) ligand 25                                                           | -4.4605064 down  | -2.8125806 down |
| STK32A        | NM_145001    | serine/threonine kinase 32A                                                               | -3.9841325 down  | -2.125329 down  |
| LOC100128988  | AK023614     | uncharacterized LOC100128988                                                              | -5.826838 down   | -2.5201375 down |
| OR3A4P        | NR_024128    | olfactory receptor, family 3, subfamily A, member 4 pseudogene                            | -2.4522014 down  | -2.0444016 down |
| LOC100132005  | AK092662     | uncharacterized LOC100132005                                                              | -3.9472644 down  | -2.2618313 down |
| MIR143HG      | NR_027180    | MIR143 host gene (non-protein coding)                                                     | -2.0151367 down  | -2.3195164 down |
| SLC39A5       | NM_001135195 | solute carrier family 39 (zinc transporter), member 5                                     | -4.9817257 down  | -2.177772 down  |
| OR51D1        | NM_001004751 | olfactory receptor, family 51, subfamily D, member 1                                      | -2.6888237 down  | -2.7234256 down |
| ZSCAN5D       | XM_003403711 | zinc finger and SCAN domain containing 5D                                                 | -4.5405416 down  | -2.763367 down  |
| AANAT         | NM_001166579 | aralkylamine N-acetyltransferase                                                          | -3.5853052 down  | -4.4548736 down |
| SPATA4        | NM_144644    | spermatogenesis associated 4                                                              | -3.9177687 down  | -2.0024173 down |
| UPK1A         | NM_007000    | uropodin 1A                                                                               | -2.2895222 down  | -3.35515 down   |
|               |              |                                                                                           | -3.8948188 down  | -2.079903 down  |
| SPPL2B        | NM_152988    | signal peptide peptidase like 2B                                                          | -2.820456 down   | -2.3410263 down |
| OPA1          | NM_130831    | optic atrophy 1 (autosomal dominant)                                                      | -3.345311 down   | -2.2762234 down |
| C20orf166-AS1 | NR_033263    | C20orf166 antisense RNA 1                                                                 | -3.3013394 down  | -3.677217 down  |
|               |              |                                                                                           | -2.2027879 down  | -2.2614367 down |
| HTR6          | NM_000871    | 5-hydroxytryptamine (serotonin) receptor 6, G protein-coupled                             | -3.94895 down    | -4.801688 down  |
| LOC729732     | XR_247131    | uncharacterized LOC729732                                                                 | -3.3206744 down  | -5.959142 down  |
| GOLGA6L1      | NM_001001413 | golgin A6 family-like 1                                                                   | -5.487814 down   | -3.3031168 down |
| OR5C1         | NM_001001923 | olfactory receptor, family 5, subfamily C, member 1                                       | -2.1553092 down  | -2.0499384 down |
| CD300LG       | NM_145273    | CD300 molecule-like family member g                                                       | -2.7944899 down  | -4.8576713 down |
| CD37          | XR_243973    | CD37 molecule                                                                             | -4.721688 down   | -2.8741121 down |
| XLOC_014512   |              |                                                                                           | -2.4976802 down  | -2.7772305 down |
| HOXB3         | NM_002146    | homeobox B3                                                                               | -2.8945665 down  | -3.075062 down  |
|               |              |                                                                                           | -2.676337 down   | -2.4572413 down |
| TCTE1         | NM_182539    | t-complex-associated-testis-expressed 1                                                   | -2.521798 down   | -2.600335 down  |
| RUSC1-AS1     | NM_001039517 | RUSC1 antisense RNA 1                                                                     | -2.4845698 down  | -4.7683234 down |
| LOC344887     |              | NmrA-like family domain containing 1 pseudogene                                           | -2.2412922 down  | -2.1797147 down |
| CEND1         | NM_016564    | cell cycle exit and neuronal differentiation 1                                            | -2.2966251 down  | -2.1468523 down |

|             |              |                                                                                         |                  |                 |
|-------------|--------------|-----------------------------------------------------------------------------------------|------------------|-----------------|
| SYCN        | NM_001080468 | syncollin                                                                               | -2.8738527 down  | -4.126801 down  |
|             |              |                                                                                         | -5.363066 down   | -2.6321282 down |
| TCP10L      | NM_144659    | t-complex 10-like                                                                       | -3.8079617 down  | -2.1274908 down |
| LOC285084   |              | uncharacterized LOC285084                                                               | -6.156386 down   | -3.2387424 down |
| GATA4       | XM_005272387 | GATA binding protein 4                                                                  | -3.3302603 down  | -3.4079113 down |
| L2HGDH      | NM_024884    | L-2-hydroxyglutarate dehydrogenase                                                      | -3.8875659 down  | -7.3986907 down |
| IKZF2       | NM_001079526 | IKAROS family zinc finger 2 (Helios)                                                    | -2.4134467 down  | -2.096539 down  |
| FOXB2       | NM_001013735 | forkhead box B2                                                                         | -3.9257894 down  | -2.2824314 down |
| LINC00162   |              | long intergenic non-protein coding RNA 162                                              | -4.4838343 down  | -2.2422283 down |
| LOC400891   |              | chromosome 14 open reading frame 166B pseudogene                                        | -2.215716 down   | -3.673029 down  |
| DMBT1       | NM_007329    | deleted in malignant brain tumors 1                                                     | -5.848115 down   | -5.0211787 down |
| TTBK1       | NM_032538    | tau tubulin kinase 1                                                                    | -8.653743 down   | -3.3152597 down |
|             |              |                                                                                         | -2.904501 down   | -4.1136 down    |
| CA10        | NM_020178    | carbonic anhydrase X                                                                    | -4.0328526 down  | -2.1008806 down |
| PTCH1       | AB214500     | patched 1                                                                               | -3.7899678 down  | -5.1449695 down |
| KLK13       | AY923173     | kallikrein-related peptidase 13                                                         | -4.9105315 down  | -2.6436265 down |
| TNFRSF13C   | NM_052945    | tumor necrosis factor receptor superfamily, member 13C                                  | -2.1515656 down  | -2.2379334 down |
| SLC22A7     | NM_153320    | solute carrier family 22 (organic anion transporter), member 7                          | -4.192265 down   | -3.2391326 down |
|             |              |                                                                                         | -2.8490677 down  | -3.094894 down  |
| LINC00337   | NR_103534    | long intergenic non-protein coding RNA 337                                              | -4.958702 down   | -2.6796117 down |
|             |              |                                                                                         | -2.231278 down   | -2.2449286 down |
| OTOP3       | NM_178233    | otopetrin 3                                                                             | -3.9969406 down  | -2.1958504 down |
|             | AY461701     |                                                                                         | -4.7512646 down  | -3.6513202 down |
| PLEKHN1     | NM_032129    | pleckstrin homology domain containing, family N member 1                                | -3.2920194 down  | -4.4371614 down |
| TNP1        | NM_003284    | transition protein 1 (during histone to protamine replacement)                          | -7.639208 down   | -3.239564 down  |
| LINC00521   | NR_024182    | long intergenic non-protein coding RNA 521                                              | -6.8597307 down  | -13.302271 down |
| PREX2       | NM_025170    | phosphatidylinositol-3,4,5-trisphosphate-dependent Rac exchange factor 2                | -2.065082 down   | -2.5224254 down |
| NTRK3       | XR_253443    | neurotrophic tyrosine kinase, receptor, type 3                                          | -4.179228 down   | -3.1561337 down |
|             |              |                                                                                         | -8.691348 down   | -6.5622582 down |
| PDPN        | NM_198389    | podoplanin                                                                              | -3.0143769 down  | -2.4606566 down |
| GOLGA8O     | NM_001277308 | golgin A8 family, member O                                                              | -4.9697156 down  | -6.2678037 down |
| PDE4D       | NM_001197218 | phosphodiesterase 4D, cAMP-specific                                                     | -2.9013636 down  | -3.2914772 down |
|             |              |                                                                                         | -4.2725863 down  | -2.5822186 down |
| SALL4       | NM_020436    | spalt-like transcription factor 4                                                       | -5.617824 down   | -7.585921 down  |
|             | AK128018     |                                                                                         | -3.326546 down   | -2.0155284 down |
| PCDH10      | NM_020815    | protocadherin 10                                                                        | -10.423427 down  | -3.8829024 down |
|             |              |                                                                                         | -7.27371 down    | -4.033067 down  |
|             |              |                                                                                         | -2.78899 down    | -2.1923654 down |
| MUC2        | NM_002457    | mucin 2, oligomeric mucus/gel-forming                                                   | -2.0494304 down  | -2.0623684 down |
| NME9        | NM_178130    | NME/NM23 family member 9                                                                | -2.343076 down   | -2.1936576 down |
| LOC283038   |              | uncharacterized LOC283038                                                               | -5.1055355 down  | -3.2461724 down |
| YIPF7       | NM_182592    | Yip1 domain family, member 7                                                            | -4.312422 down   | -2.478259 down  |
| HMCN1       | NM_031935    | hemcentin 1                                                                             | -2.1529458 down  | -4.2775693 down |
| H2AFB1      | NM_001017990 | H2A histone family, member B1                                                           | -2.5806627 down  | -2.1886191 down |
| OR8H2       | NM_001005200 | olfactory receptor, family 8, subfamily H, member 2                                     | -4.1839037 down  | -6.4763327 down |
| C2orf27A    | NM_013310    | chromosome 2 open reading frame 27A                                                     | -2.3645375 down  | -2.1131563 down |
| SLC25A16    | BC001407     | solute carrier family 25 (mitochondrial carrier; Graves disease autoantigen), member 16 | -3.2903755 down  | -4.07135 down   |
| FLG         | NM_002016    | filaggrin                                                                               | -6.6835027 down  | -4.5268593 down |
| CREB3L3     | NM_032607    | cAMP responsive element binding protein 3-like 3                                        | -7.3778715 down  | -5.5571895 down |
| LOC283335   | NR_033854    | uncharacterized LOC283335                                                               | -3.906171 down   | -2.1808505 down |
| ERBB3       | NM_001005915 | v-erb-b2 avian erythroblastic leukemia viral oncogene homolog 3                         | -3.073997 down   | -2.7754562 down |
| GPR123      | NM_001083909 | G protein-coupled receptor 123                                                          | -2.199137 down   | -2.4919996 down |
| HIST1H2APS1 |              | histone cluster 1, H2a, pseudogene 1                                                    | -2.4418077 down  | -2.6281953 down |
| TPTE2P3     | NR_002793    | transmembrane phosphoinositide 3-phosphatase and tensin homolog 2 pseudogene 3          | -6.196592 down   | -2.5212119 down |
| SNCAIP      | NM_005460    | synuclein, alpha interacting protein                                                    | -2.5305371 down  | -2.3968954 down |
|             |              |                                                                                         | -10.0941515 down | -12.246122 down |
| FOXA1       |              | forkhead box A1                                                                         | -5.672315 down   | -3.9074488 down |
| OR51E1      | NM_152430    | olfactory receptor, family 51, subfamily E, member 1                                    | -4.7580957 down  | -2.1475463 down |
|             |              |                                                                                         | -3.8761833 down  | -3.3969452 down |

|              |              |                                                                                  |                 |                 |
|--------------|--------------|----------------------------------------------------------------------------------|-----------------|-----------------|
| ANKRD20A12P  | NR_046228    | ankyrin repeat domain 20 family, member A12, pseudogene                          | -4.617865 down  | -3.2308414 down |
| SLC5A6       | NM_021095    | solute carrier family 5 (sodium/multivitamin and iodide cotransporter), member 6 | -2.6141648 down | -2.4534147 down |
| PDXK         | XM_005261201 | pyridoxal (pyridoxine, vitamin B6) kinase                                        | -2.4855683 down | -2.0311298 down |
| FGF17        | NM_003867    | fibroblast growth factor 17                                                      | -4.12194 down   | -4.1033063 down |
| CFLAR        | NM_001202519 | CASP8 and FADD-like apoptosis regulator                                          | -4.2781434 down | -4.6703625 down |
|              |              |                                                                                  | -3.527747 down  | -2.7066426 down |
| RP1L1        | AK127545     | retinitis pigmentosa 1-like 1                                                    | -3.0141788 down | -2.7269533 down |
| OR1F1        | NM_012360    | olfactory receptor, family 1, subfamily F, member 1                              | -5.768367 down  | -4.514842 down  |
| MRGPRD       | NM_198923    | MAS-related GPR, member D                                                        | -6.7391796 down | -3.5890746 down |
| LRRN4        | NM_152611    | leucine rich repeat neuronal 4                                                   | -2.4337735 down | -2.4662676 down |
| C1QTNF7      | NM_031911    | C1q and tumor necrosis factor related protein 7                                  | -2.0753133 down | -2.151715 down  |
| ZNF812       | NM_001199814 | zinc finger protein 812                                                          | -2.3612852 down | -2.6769469 down |
|              | XR_109680    |                                                                                  | -3.2096179 down | -2.4871452 down |
| LOC399829    |              | uncharacterized LOC399829                                                        | -3.523806 down  | -3.4007292 down |
| NRN1         | NM_016588    | neuritin 1                                                                       | -4.3750463 down | -2.3697023 down |
| NDP          | NM_000266    | Norrie disease (pseudoglioma)                                                    | -2.4819515 down | -2.5220702 down |
| XLOC_014512  |              |                                                                                  | -4.9803357 down | -6.0992327 down |
| NRG1         | NM_004495    | neuregulin 1                                                                     | -3.4265642 down | -3.5246947 down |
| TTLL9        | NM_001008409 | tubulin tyrosine ligase-like family, member 9                                    | -3.3337328 down | -3.0298066 down |
|              |              |                                                                                  | -2.87328 down   | -3.7075272 down |
| BEST3        | NM_001282614 | bestrophin 3                                                                     | -3.2675202 down | -4.591873 down  |
| GSG1         | NM_001080554 | germ cell associated 1                                                           | -3.887381 down  | -4.001791 down  |
|              |              |                                                                                  | -4.4213104 down | -3.6939983 down |
|              |              |                                                                                  | -5.0280814 down | -2.902639 down  |
| MLPH         | NM_024101    | melanophilin                                                                     | -3.6302767 down | -2.6889625 down |
| COL5A1       | AK057231     | collagen, type V, alpha 1                                                        | -3.1718087 down | -4.067668 down  |
|              |              |                                                                                  | -5.963965 down  | -3.7325935 down |
| GRAMD2       | NM_001012642 | GRAM domain containing 2                                                         | -2.6142683 down | -2.04428 down   |
| DMC1         | NM_007068    | DNA meiotic recombinase 1                                                        | -3.1878057 down | -2.5993614 down |
| ANKMY1       | NM_017844    | ankyrin repeat and MYND domain containing 1                                      | -2.2135456 down | -3.5635881 down |
| GNRHR        | NM_000406    | gonadotropin-releasing hormone receptor                                          | -2.5192702 down | -2.2511566 down |
| DNM1P46      | NR_003260    | DNM1 pseudogene 46                                                               | -2.924564 down  | -3.9727767 down |
|              |              |                                                                                  | -2.277879 down  | -2.5086474 down |
| PLSCR4       | NM_020353    | phospholipid scramblase 4                                                        | -3.4526606 down | -2.0200844 down |
| YEATS2       | AK090720     | YEATS domain containing 2                                                        | -3.4195857 down | -2.1613255 down |
| PTGR1        | NM_012212    | prostaglandin reductase 1                                                        | -3.185148 down  | -2.6007707 down |
|              |              |                                                                                  | -3.5763938 down | -3.0213652 down |
| ATE1         | NM_001001976 | arginyltransferase 1                                                             | -2.4992554 down | -2.19486 down   |
| TMEM174      | NM_153217    | transmembrane protein 174                                                        | -5.639762 down  | -5.9497805 down |
| FLJ25363     | NM_001145553 | uncharacterized LOC401082                                                        | -2.058923 down  | -2.0607967 down |
|              |              |                                                                                  | -9.519212 down  | -4.476083 down  |
|              |              |                                                                                  | -2.1686904 down | -3.219986 down  |
| ZNF3         | NM_017715    | zinc finger protein 3                                                            | -2.2520313 down | -4.0247526 down |
| BRINP1       | BC021560     | bone morphogenetic protein/retinoic acid inducible neural-specific 1             | -4.0490446 down | -2.245867 down  |
| C8orf44-SGK3 | NM_001204173 | C8orf44-SGK3 readthrough                                                         | -2.279959 down  | -2.4135082 down |
|              |              |                                                                                  | -2.1664078 down | -2.2181242 down |
| CRMP1        | NM_001014809 | collapsin response mediator protein 1                                            | -3.3279607 down | -4.3283453 down |
| XLOC_014512  |              |                                                                                  | -3.7703242 down | -2.093263 down  |
| LOC728208    | AK055890     | uncharacterized LOC728208                                                        | -3.6769822 down | -4.2462087 down |
|              | XR_241667    |                                                                                  | -3.223834 down  | -2.7122898 down |
| SUPT20HL2    | NM_001136233 | suppressor of Ty 20 homolog (S. cerevisiae)-like 2                               | -4.5437694 down | -3.7483592 down |
| NPAS1        | NM_002517    | neuronal PAS domain protein 1                                                    | -2.8871007 down | -2.5409536 down |
| PODNL1       | NM_024825    | podocan-like 1                                                                   | -6.30966 down   | -5.9561896 down |
| GPR115       | NM_153838    | G protein-coupled receptor 115                                                   | -2.6663744 down | -2.7746212 down |
| DND1         | NM_194249    | DND microRNA-mediated repression inhibitor 1                                     | -2.372499 down  | -2.0638418 down |
|              | AK125712     |                                                                                  | -2.8168895 down | -3.7789106 down |
| CDH16        | NM_004062    | cadherin 16, KSP-cadherin                                                        | -6.998267 down  | -2.9937773 down |
| LOC100132014 | AK092445     | uncharacterized LOC100132014                                                     | -4.0977426 down | -3.343256 down  |
| LOC644093    | XR_133298    | hCG2040054                                                                       | -2.9958692 down | -2.7517478 down |
| ABCA9        | NM_080283    | ATP-binding cassette, sub-family A (ABC1), member 9                              | -4.275162 down  | -2.8953872 down |
|              |              |                                                                                  | -2.0994916 down | -2.2386808 down |

|              |              |                                                                                                |                 |                 |
|--------------|--------------|------------------------------------------------------------------------------------------------|-----------------|-----------------|
| TCL6         | NR_028288    | T-cell leukemia/lymphoma 6 (non-protein coding)                                                | -8.836517 down  | -3.5812922 down |
| FARP1        | NM_005766    | FERM, RhoGEF (ARHGEF) and pleckstrin domain protein 1 (chondrocyte-derived)                    | -3.7099974 down | -2.2835436 down |
| RCL1         |              | RNA terminal phosphate cyclase-like 1                                                          | -4.882639 down  | -3.2970088 down |
| DPP6         | NM_001039350 | dipeptidyl-peptidase 6                                                                         | -3.1823862 down | -3.0049343 down |
| FOXP3        | NM_014009    | forkhead box P3                                                                                | -4.87151 down   | -4.514639 down  |
| LOC100270679 | NR_038394    | uncharacterized LOC100270679                                                                   | -2.1174169 down | -2.0533419 down |
| TMEM89       | NM_001008269 | transmembrane protein 89                                                                       | -3.4841127 down | -2.6754577 down |
| GALNT9       | NM_021808    | UDP-N-acetyl-alpha-D-galactosamine:polypeptide N-acetylgalactosaminyltransferase 9 (GalNAc-T9) | -3.989943 down  | -2.730447 down  |
| SLC19A3      | NM_025243    | solute carrier family 19 (thiamine transporter), member 3                                      | -5.364873 down  | -2.3163168 down |
| TMEM235      | NM_001204210 | transmembrane protein 235                                                                      | -3.0739653 down | -2.0669942 down |
| PRODH        | BC036534     | proline dehydrogenase (oxidase) 1                                                              | -5.142528 down  | -10.200586 down |
| VPS37A       | AL834189     | vacuolar protein sorting 37 homolog A (S. cerevisiae)                                          | -3.666253 down  | -4.1268883 down |
| TRHDE-AS1    | NR_026836    | TRHDE antisense RNA 1                                                                          | -3.3388712 down | -4.231664 down  |
|              | AW593215     |                                                                                                | -2.1635778 down | -2.7135425 down |
| GHRLOS       | NR_073566    | ghrelin opposite strand/antisense RNA                                                          | -3.8931842 down | -2.1587815 down |
| LOC100144602 | NR_034138    | uncharacterized LOC100144602                                                                   | -2.0717487 down | -2.9488413 down |
|              | DA797466     |                                                                                                | -2.3212717 down | -2.9478412 down |
| RNF165       | NM_152470    | ring finger protein 165                                                                        | -4.896772 down  | -3.4381387 down |
| MORN1        | NM_024848    | MORN repeat containing 1                                                                       | -2.9358544 down | -4.107947 down  |
| USHBP1       | NM_031941    | Usher syndrome 1C binding protein 1                                                            | -3.496437 down  | -2.897544 down  |
| GOLGA6A      | NM_001038640 | golgin A6 family, member A                                                                     | -2.4638755 down | -4.779135 down  |
| SCARA5       | NM_173833    | scavenger receptor class A, member 5 (putative)                                                | -7.139853 down  | -5.4821634 down |
| ASIP         | NM_001672    | agouti signaling protein                                                                       | -5.4780416 down | -3.289856 down  |
|              |              |                                                                                                | -2.2436392 down | -3.1757426 down |
|              |              |                                                                                                | -3.0855982 down | -3.1825237 down |
|              |              |                                                                                                | -3.2393532 down | -2.0611525 down |
| SPRR2B       | NM_001017418 | small proline-rich protein 2B                                                                  | -3.6214142 down | -2.376864 down  |
| LINC00087    | NR_024493    | long intergenic non-protein coding RNA 87                                                      | -3.4455636 down | -2.7784214 down |
| FRG2         | NM_001005217 | FSHD region gene 2                                                                             | -2.1598742 down | -3.2779982 down |
| LYZL2        | NM_183058    | lysozyme-like 2                                                                                | -3.7891939 down | -2.972997 down  |
|              |              |                                                                                                | -3.6120558 down | -3.2739453 down |
| PNMA6A       | NM_032882    | paraneoplastic Ma antigen family member 6A                                                     | -2.8800113 down | -2.3811274 down |
| C8orf37      | NM_177965    | chromosome 8 open reading frame 37                                                             | -2.3259041 down | -2.026593 down  |
| TSPEAR-AS1   | NR_103707    | TSPEAR antisense RNA 1                                                                         | -3.1262767 down | -3.9372993 down |
| SLC26A7      | NM_052832    | solute carrier family 26 (anion exchanger), member 7                                           | -6.679923 down  | -3.6869466 down |
|              |              |                                                                                                | -4.819006 down  | -5.557467 down  |
| SLCO4C1      | AF119865     | solute carrier organic anion transporter family, member 4C1                                    | -2.5227711 down | -2.5298479 down |
| MPPED1       | NM_001044370 | metallophosphoesterase domain containing 1                                                     | -9.362119 down  | -5.874022 down  |
| DBIL5P2      | NR_036635    | diazepam binding inhibitor-like 5 pseudogene 2                                                 | -3.343624 down  | -3.0367873 down |
| MED1         | NM_004774    | mediator complex subunit 1                                                                     | -3.148989 down  | -4.8572793 down |
| GUCY2D       | NM_000180    | guanylate cyclase 2D, membrane (retina-specific)                                               | -3.742484 down  | -2.2980378 down |
|              | AK026667     |                                                                                                | -5.012495 down  | -3.575991 down  |
|              | CD694834     |                                                                                                | -3.5655062 down | -6.289534 down  |
| CASS4        | NM_001164115 | Cas scaffolding protein family member 4                                                        | -2.152909 down  | -2.1462932 down |
| SLC2A1-AS1   | AK056786     | SLC2A1 antisense RNA 1                                                                         | -2.7799091 down | -3.794238 down  |
| BLACE        | NR_103545    | B-cell acute lymphoblastic leukemia expressed                                                  | -2.6555748 down | -2.6677935 down |
| SLC9A7       | NM_032591    | solute carrier family 9, subfamily A (NHE7, cation proton antiporter 7), member 7              | -2.1925597 down | -2.1704664 down |
| CCBE1        | NM_133459    | collagen and calcium binding EGF domains 1                                                     | -2.2427454 down | -2.804313 down  |
| OPN5         | NM_181744    | opsin 5                                                                                        | -3.1091917 down | -3.137884 down  |
| INADL        | AJ001306     | InaD-like (Drosophila)                                                                         | -3.5576234 down | -2.2827427 down |
| CCDC40       | NM_001243342 | coiled-coil domain containing 40                                                               | -2.184633 down  | -2.201744 down  |
| LOC389602    | AK124321     | uncharacterized LOC389602                                                                      | -4.4012833 down | -2.602459 down  |
|              | BX648392     |                                                                                                | -3.1091304 down | -2.781433 down  |
| CSPG4P8      | NR_033579    | chondroitin sulfate proteoglycan 4 pseudogene 8                                                | -4.6197977 down | -3.6204724 down |
| ZNF717       | NM_001128223 | zinc finger protein 717                                                                        | -3.7600822 down | -2.0979207 down |
| TSGA10       | NM_025244    | testis specific, 10                                                                            | -3.5671353 down | -2.0500958 down |
| LOC101929256 | XR_242748    | uncharacterized LOC101929256                                                                   | -10.446433 down | -4.113459 down  |
| DEFB121      | NM_001171832 | defensin, beta 121                                                                             | -10.808161 down | -5.5644264 down |
| TRIM36       | NM_001017397 | tripartite motif containing 36                                                                 | -4.4509544 down | -2.3733952 down |
| LRLT2        | NM_001284223 | leucine-rich repeat, immunoglobulin-like and transmembrane domains 2                           | -2.6727815 down | -2.9736469 down |

|              |              |                                                                                 |                 |                 |
|--------------|--------------|---------------------------------------------------------------------------------|-----------------|-----------------|
|              | BC029571     |                                                                                 | -2.869104 down  | -3.9679463 down |
| TRIM53AP     | NR_028346    | tripartite motif containing 53A, pseudogene                                     | -6.196078 down  | -2.2950032 down |
| ARHGEF33     | NM_001145451 | Rho guanine nucleotide exchange factor (GEF) 33                                 | -4.192055 down  | -4.3038073 down |
| BPIFC        | NM_174932    | BPI fold containing family C                                                    | -4.952355 down  | -2.704431 down  |
| URAHF        | NR_027335    | urate (hydroxyiso-) hydrolase, pseudogene                                       | -3.1641784 down | -2.9379911 down |
| PEX26        | NM_001199319 | peroxisomal biogenesis factor 26                                                | -2.643714 down  | -2.410133 down  |
| HYAL4        | NM_012269    | hyaluronoglucosaminidase 4                                                      | -4.994242 down  | -2.448535 down  |
| ANGPTL4      | NM_139314    | angiopoietin-like 4                                                             | -4.4138093 down | -2.9992814 down |
| SLC38A4      | NM_018018    | solute carrier family 38, member 4                                              | -3.1320074 down | -3.050788 down  |
| RAB19        | NM_001008749 | RAB19, member RAS oncogene family                                               | -4.1937647 down | -5.7299867 down |
| ZNF320       | AK307375     | zinc finger protein 320                                                         | -3.2322986 down | -4.9440103 down |
| LY6K         | NM_017527    | lymphocyte antigen 6 complex, locus K                                           | -4.3846498 down | -3.219032 down  |
|              | XR_253355    |                                                                                 | -2.8110096 down | -2.912551 down  |
| FAT2         | NM_001447    | FAT atypical cadherin 2                                                         | -2.0005474 down | -2.0715022 down |
|              |              |                                                                                 | -3.2356954 down | -2.9836261 down |
| FLJ40039     | AK097358     | uncharacterized LOC647662                                                       | -7.326995 down  | -7.3407874 down |
| ASRGL1       | NM_001083926 | asparaginase like 1                                                             | -5.146012 down  | -2.5058482 down |
| LOC100130207 | XR_245244    | uncharacterized LOC100130207                                                    | -3.2457929 down | -2.7351577 down |
|              | A25493       |                                                                                 | -2.0449417 down | -4.0344954 down |
| LOC100128402 | AK124574     | uncharacterized LOC100128402                                                    | -3.227346 down  | -2.0488076 down |
| SIX1         | NM_005982    | SIX homeobox 1                                                                  | -5.4981327 down | -6.201456 down  |
| XLOC_014512  |              |                                                                                 | -7.9634647 down | -6.688405 down  |
| TICRR        | NM_152259    | TOPBP1-interacting checkpoint and replication regulator                         | -3.413 down     | -2.2031682 down |
| ANP32A       | AK127498     | acidic (leucine-rich) nuclear phosphoprotein 32 family, member A                | -2.9449587 down | -2.457489 down  |
| RDX          | NM_001260492 | radixin                                                                         | -2.7580304 down | -3.0268786 down |
| HTATSF1P2    | NR_033884    | HIV-1 Tat specific factor 1 pseudogene 2                                        | -4.959301 down  | -2.7865615 down |
| IL21R-AS1    | NR_037158    | IL21R antisense RNA 1                                                           | -2.1568296 down | -2.1284125 down |
|              |              |                                                                                 | -3.0915384 down | -3.9829996 down |
| C15orf59     | NM_001039614 | chromosome 15 open reading frame 59                                             | -5.095286 down  | -3.7594361 down |
| TNC          | NM_002160    | tenascin C                                                                      | -2.8688912 down | -3.2533302 down |
| MAP1LC3C     | NM_001004343 | microtubule-associated protein 1 light chain 3 gamma                            | -4.9354134 down | -2.7137017 down |
| SDCBP2       | NM_080489    | syndecan binding protein (syntenin) 2                                           | -3.2117202 down | -4.48174 down   |
|              |              |                                                                                 | -2.073658 down  | -2.434551 down  |
|              |              |                                                                                 | -3.0981166 down | -2.793236 down  |
| ETV3         | NM_001145312 | ets variant 3                                                                   | -5.5510178 down | -3.0406468 down |
| LPA          | NM_005577    | lipoprotein, Lp(a)                                                              | -2.8777912 down | -2.0264592 down |
| ERC2         | NM_015576    | ELKS/RAB6-interacting/CAST family member 2                                      | -3.2305107 down | -2.3619015 down |
| TMEM52       | NM_178545    | transmembrane protein 52                                                        | -2.8768456 down | -5.5612707 down |
| TEX35        |              | testis expressed 35                                                             | -5.3534317 down | -2.3776698 down |
|              | BC025775     |                                                                                 | -3.1246405 down | -3.3646216 down |
|              |              |                                                                                 | -2.6537619 down | -4.065298 down  |
| PTPRQ        | NM_001145026 | protein tyrosine phosphatase, receptor type, Q                                  | -4.2192388 down | -3.1092496 down |
| SEMA6C       | NM_030913    | sema domain, transmembrane domain (TM), and cytoplasmic domain, (semaphorin) 6C | -4.878546 down  | -5.4617624 down |
| LOC100130954 | NR_034016    | uncharacterized LOC100130954                                                    | -5.480152 down  | -6.72411 down   |
|              |              |                                                                                 | -4.794201 down  | -3.1852295 down |
| DIO3         | NM_001362    | deiodinase, iodothyronine, type III                                             | -5.387029 down  | -4.2080483 down |
| LOC729159    | NM_001282301 | UPF0607 protein ENSP00000381418-like                                            | -2.4853585 down | -2.254708 down  |
| IFNA4        | NM_021068    | interferon, alpha 4                                                             | -3.0964239 down | -2.1906059 down |
|              |              |                                                                                 | -3.3436778 down | -3.3933635 down |
| PRAMEF5      | NM_001013407 | PRAME family member 5                                                           | -3.6232092 down | -2.5051455 down |
| ANO7         | NM_001001891 | anoctamin 7                                                                     | -2.8737407 down | -3.3846624 down |
|              |              |                                                                                 | -3.64133 down   | -5.701493 down  |
|              | BC085019     |                                                                                 | -3.6552308 down | -4.041795 down  |
| LOC100130278 | AK094114     | uncharacterized LOC100130278                                                    | -2.7314095 down | -2.1353686 down |
| LOC728196    | BC021736     | uncharacterized LOC728196                                                       | -3.7549574 down | -3.0604086 down |
| CDH23        | NM_052836    | cadherin-related 23                                                             | -3.1131163 down | -3.5766797 down |
| TP53AIP1     | NM_001195195 | tumor protein p53 regulated apoptosis inducing protein 1                        | -6.3529067 down | -5.6300135 down |
| ZNF521       | NM_015461    | zinc finger protein 521                                                         | -5.4888496 down | -4.9204555 down |
| LOC100652869 | XM_005254101 | basic proline-rich protein-like                                                 | -3.5021257 down | -2.2566817 down |
| TMEM54       | NM_033504    | transmembrane protein 54                                                        | -3.1583796 down | -3.4771028 down |
| JAZF1-AS1    | NR_034097    | JAZF1 antisense RNA 1                                                           | -2.0210278 down | -2.2433896 down |
|              |              |                                                                                 | -3.9052703 down | -2.7800899 down |



|              |                        |                                                               |                                                       |                                                      |
|--------------|------------------------|---------------------------------------------------------------|-------------------------------------------------------|------------------------------------------------------|
| FBLL1        | NR_024356<br>M27336    | fibrillar-like 1                                              | -2.1588242 down<br>-5.0882497 down<br>-3.0497742 down | -2.3722076 down<br>-3.7871387 down<br>-2.549752 down |
| LINC00693    |                        | long intergenic non-protein coding RNA 693                    | -2.5811281 down                                       | -2.0339217 down                                      |
| CELF6        | NM_001172684           | CUGBP, Elav-like family member 6                              | -2.3446755 down                                       | -2.6516817 down                                      |
| LOC100131048 | AK125976               | uncharacterized LOC100131048                                  | -2.395401 down                                        | -2.0402286 down                                      |
| FAM183B      | NR_028347              | acyloxyacyl hydrolase (neutrophil)                            | -2.4139957 down                                       | -2.2025957 down                                      |
| OR2G2        | NM_001001915           | olfactory receptor, family 2, subfamily G, member 2           | -5.1925764 down                                       | -2.0096073 down                                      |
| POTEI        | NM_001277406           | POTE ankyrin domain family, member I                          | -3.1637805 down<br>-2.0912874 down                    | -4.067189 down<br>-2.7782009 down                    |
| CCDC144A     | NM_014695              | coiled-coil domain containing 144A                            | -2.8149688 down                                       | -2.0681257 down                                      |
| GRID1        | NM_017551              | glutamate receptor, ionotropic, delta 1                       | -5.60282 down                                         | -3.1634269 down                                      |
| HNRNPA3      | NM_194247              | heterogeneous nuclear ribonucleoprotein A3                    | -3.1076338 down                                       | -2.4045832 down                                      |
| INSC         | NM_001031853           | inscuteable homolog (Drosophila)                              | -2.363814 down                                        | -2.2724304 down                                      |
| APOB         | BC051278               | apolipoprotein B                                              | -2.3353279 down<br>-3.0941298 down                    | -2.2254267 down<br>-5.587338 down                    |
| XLOC_014512  |                        |                                                               | -5.463075 down<br>-5.4829135 down                     | -3.195272 down<br>-5.6406894 down                    |
| C9orf84      | XR_243752<br>NM_173521 | chromosome 9 open reading frame 84                            | -5.6855555 down                                       | -2.2580492 down                                      |
| STARD9       |                        | STAR-related lipid transfer (START) domain containing 9       | -3.0600054 down                                       | -4.066877 down                                       |
| GAMT         | NM_138924              | guanidinoacetate N-methyltransferase                          | -2.1603847 down                                       | -3.1134667 down                                      |
| XLOC_012299  |                        |                                                               | -3.5615017 down                                       | -3.5790865 down                                      |
| PYCR1        | NM_006907<br>AY461701  | pyrroline-5-carboxylate reductase 1                           | -2.239936 down<br>-5.131562 down                      | -2.8095202 down<br>-4.0095925 down                   |
| CLDN3        | NM_001306              | claudin 3                                                     | -2.3323839 down                                       | -2.3020046 down                                      |
| PDZRN3       | BC014432               | PDZ domain containing ring finger 3                           | -3.8516345 down                                       | -2.4092207 down                                      |
| FFAR1        | NM_005303              | free fatty acid receptor 1                                    | -2.783463 down<br>-4.4301763 down                     | -2.0572886 down<br>-3.677437 down                    |
| IL24         | NM_001185156           | interleukin 24                                                | -2.484814 down<br>-7.163365 down                      | -2.5446966 down<br>-14.694345 down                   |
| AQP12A       | NM_198998              | aquaporin 12A                                                 | -2.710312 down                                        | -2.184617 down                                       |
| FLJ41327     | AK123321               | FLJ41327 protein                                              | -4.333203 down                                        | -2.5390434 down                                      |
| TLL10-AS1    | XR_132470              | TLL10 antisense RNA 1                                         | -2.3095708 down                                       | -2.3826046 down                                      |
| PRAMEF13     | NM_001024661           | PRAME family member 13                                        | -2.5607765 down<br>-3.0229836 down                    | -3.3176877 down<br>-2.4075794 down                   |
| C21orf88     | NR_026543              | chromosome 21 open reading frame 88                           | -3.1558237 down                                       | -3.1465907 down                                      |
| ZNF502       | NM_033210<br>AF116680  | zinc finger protein 502                                       | -2.2319617 down<br>-3.204686 down                     | -2.3460853 down<br>-2.1041095 down                   |
| XLOC_014512  |                        |                                                               | -4.199353 down                                        | -2.1084313 down                                      |
| ZNF7         | NM_001282796           | zinc finger protein 7                                         | -2.7727046 down                                       | -2.479293 down                                       |
| KCNE1        | NM_000219              | potassium voltage-gated channel, Isk-related family, member 1 | -2.320797 down<br>-3.609129 down                      | -2.353031 down<br>-2.3282945 down                    |
| GATA1        | AF190748               | FGF2-associated protein GATA1                                 | -4.1789336 down                                       | -3.424499 down                                       |
| CHSY3        | NM_175856              | chondroitin sulfate synthase 3                                | -2.85819 down                                         | -2.0585327 down                                      |
| LOC339874    | NR_038976              | uncharacterized LOC339874                                     | -2.7612095 down                                       | -3.359486 down                                       |
| IGFL2        | AK125754               | IGF-like family member 2                                      | -2.6383815 down<br>-2.5658398 down                    | -2.1914747 down<br>-2.1889653 down                   |
| MSLN         | NM_005823              | mesothelin                                                    | -3.9712124 down                                       | -2.1629236 down                                      |
| SYNGAP1      | NM_006772              | synaptic Ras GTPase activating protein 1                      | -2.5596788 down<br>-2.423149 down                     | -2.3855743 down<br>-2.4489183 down                   |
| DEFB109P1    | NR_024044              | defensin, beta 109, pseudogene 1                              | -3.2719843 down                                       | -2.6331418 down                                      |
| WDR96        | NM_025145              | WD repeat domain 96                                           | -4.8922844 down                                       | -3.6573246 down                                      |
| USP49        | NM_001286554           | ubiquitin specific peptidase 49                               | -2.6954446 down                                       | -2.0703204 down                                      |
| FGD5         | NM_152536              | FYVE, RhoGEF and PH domain containing 5                       | -4.523561 down                                        | -3.1576493 down                                      |
| SGSM2        | AK124883               | small G protein signaling modulator 2                         | -3.5707347 down                                       | -4.649883 down                                       |
| FLT4         | AB209637               | fms-related tyrosine kinase 4                                 | -2.0052538 down                                       | -2.8877766 down                                      |
| RNF216       | AK128551               | ring finger protein 216                                       | -2.2064335 down                                       | -3.6984475 down                                      |
| VSX1         | NM_001256272           | visual system homeobox 1                                      | -2.4522958 down                                       | -3.3461142 down                                      |
| NRG3         | NM_001010848           | neuregulin 3                                                  | -3.7313676 down                                       | -2.1122186 down                                      |
| STK16        | NM_001008910           | serine/threonine kinase 16                                    | -4.1459317 down                                       | -5.1239147 down                                      |
| LINC00410    |                        | long intergenic non-protein coding RNA 410                    | -2.0326953 down                                       | -3.2167509 down                                      |
| TMCO5B       |                        | transmembrane and coiled-coil domains 5B, pseudogene          | -2.8259728 down                                       | -2.0207627 down                                      |

|                    |                          |                                                                                                                   |                                    |                                    |
|--------------------|--------------------------|-------------------------------------------------------------------------------------------------------------------|------------------------------------|------------------------------------|
| CD209              | NM_021155                | CD209 molecule                                                                                                    | -3.5167131 down                    | -4.00072 down                      |
| NADK2              | NM_001085411<br>AK309505 | NAD kinase 2, mitochondrial                                                                                       | -2.4109905 down<br>-3.0657148 down | -4.36624 down<br>-3.4554362 down   |
| LY6G5C             | NM_025262                | lymphocyte antigen 6 complex, locus G5C                                                                           | -3.8617296 down                    | -9.029468 down                     |
| PSMB11             | NM_001099780             | proteasome (prosome, macropain) subunit, beta type, 11                                                            | -5.6147547 down                    | -2.034291 down                     |
| LOC100240734       | NR_026657                | uncharacterized LOC100240734                                                                                      | -2.2160983 down                    | -2.6423094 down                    |
| TAF1L              | NM_153809<br>AF289570    | TAF1 RNA polymerase II, TATA box binding protein (TBP)-associated factor, 210kDa-like                             | -5.080518 down<br>-4.5587263 down  | -5.5881977 down<br>-4.904358 down  |
| C1orf210           | NM_182517                | chromosome 1 open reading frame 210                                                                               | -4.7883873 down                    | -3.2689347 down                    |
| KLB                | NM_175737                | klotho beta                                                                                                       | -2.282705 down                     | -2.7674081 down                    |
| LINC00273          | NR_038368                | long intergenic non-protein coding RNA 273                                                                        | -5.749421 down                     | -11.5935135 down                   |
| ANKRD18DP          | NR_003291                | ankyrin repeat domain 18D, pseudogene                                                                             | -3.2685976 down                    | -2.1356416 down                    |
| TRIM3              | NM_006458                | tripartite motif containing 3                                                                                     | -2.0928247 down                    | -2.016826 down                     |
| XKR6               | NM_173683                | XK, Kell blood group complex subunit-related family, member 6                                                     | -3.098491 down                     | -2.8963418 down                    |
| KALRN              | NM_003947                | kalirin, RhoGEF kinase                                                                                            | -4.3364773 down                    | -4.946721 down                     |
| NEBL               |                          | nebullette                                                                                                        | -3.5314546 down                    | -2.6540837 down                    |
| ERC2-IT1           | NR_024615                | ERC2 intronic transcript 1 (non-protein coding)                                                                   | -4.1177244 down                    | -3.9506292 down                    |
| MYLPF              | NM_013292                | myosin light chain, phosphorylatable, fast skeletal muscle                                                        | -2.7917573 down                    | -2.8975496 down                    |
| MAGEA2B            | NM_153488                | melanoma antigen family A, 2B                                                                                     | -6.062839 down                     | -3.042379 down                     |
| FAM110D            | NM_024869                | family with sequence similarity 110, member D                                                                     | -2.3871846 down                    | -2.0276973 down                    |
| SCGB2B3P           | BC114619                 | secretoglobin, family 2B, member 3, pseudogene                                                                    | -3.2321026 down                    | -2.5438118 down                    |
| DEFB130            | NM_001037804             | defensin, beta 130                                                                                                | -3.6249826 down                    | -2.711161 down                     |
| HSPG2              | NM_005529                | heparan sulfate proteoglycan 2                                                                                    | -3.78184 down                      | -3.7379262 down                    |
| TRPM3              | NM_001007471             | transient receptor potential cation channel, subfamily M, member 3                                                | -2.3731909 down                    | -2.509547 down                     |
| ACKR2              | NM_001296                | atypical chemokine receptor 2                                                                                     | -5.3267617 down                    | -2.5091977 down                    |
| MTHFD2P1           |                          | methylenetetrahydrofolate dehydrogenase (NADP+ dependent) 2, methenyltetrahydrofolate cyclohydrolase pseudogene 1 | -3.1037102 down                    | -2.1858025 down                    |
|                    | AK054980                 |                                                                                                                   | -2.38821 down                      | -2.2069337 down                    |
| MAGEA4             | NM_002362                | melanoma antigen family A, 4                                                                                      | -4.6131377 down                    | -2.1924 down                       |
| MYOD1              | NM_002478                | myogenic differentiation 1                                                                                        | -4.8791566 down                    | -7.1367836 down                    |
| RBM10              | AK098115                 | RNA binding motif protein 10                                                                                      | -3.2416704 down                    | -2.5255873 down                    |
| SLC28A1            | NM_201651                | solute carrier family 28 (concentrative nucleoside transporter), member 1                                         | -4.0050144 down                    | -2.9468334 down                    |
|                    |                          |                                                                                                                   | -2.3254492 down                    | -4.1608076 down                    |
| ANKRD30BP2         | NR_026916                | ankyrin repeat domain 30B pseudogene 2                                                                            | -2.039451 down                     | -2.7637517 down                    |
| KDM2B              | AB031230                 | lysine (K)-specific demethylase 2B                                                                                | -3.9652858 down<br>-4.221551 down  | -2.3524652 down<br>-2.8000383 down |
|                    |                          |                                                                                                                   | -3.4848704 down                    | -2.2860525 down                    |
| UBE2Q2P3           | NR_024474                | ubiquitin-conjugating enzyme E2Q family member 2 pseudogene 3                                                     | -4.638243 down                     | -2.3396132 down                    |
|                    | AY927536                 |                                                                                                                   | -3.1960142 down                    | -2.0427396 down                    |
| DMRT3              | NM_021240                | doublesex and mab-3 related transcription factor 3                                                                | -6.351967 down                     | -3.0700583 down                    |
|                    |                          |                                                                                                                   | -4.0810723 down                    | -3.3692966 down                    |
| GALP               | NM_033106                | galanin-like peptide                                                                                              | -2.1908662 down                    | -2.3076105 down                    |
| FBXO44             | NM_001014765             | F-box protein 44                                                                                                  | -2.466258 down                     | -3.7377772 down                    |
| SDK2               | NM_001144952             | sidekick cell adhesion molecule 2                                                                                 | -2.7065814 down<br>-2.8158572 down | -2.5141318 down<br>-2.526869 down  |
|                    |                          |                                                                                                                   | -3.9913695 down                    | -3.1192315 down                    |
| LRRC3C             | NM_001195545             | leucine rich repeat containing 3C                                                                                 | -2.8349178 down                    | -2.158264 down                     |
| C9orf117           | BC133027                 | chromosome 9 open reading frame 117                                                                               | -3.4086435 down                    | -3.2173495 down                    |
| PTGER4P2-CDK2AP2P2 | NR_024496                | PTGER4P2-CDK2AP2P2 readthrough transcribed pseudogene                                                             | -2.4928596 down                    | -3.0705323 down                    |
| KRTAP29-1          | NM_001257309             | keratin associated protein 29-1                                                                                   | -2.6373148 down<br>-4.324224 down  | -2.3721492 down<br>-2.6186666 down |
|                    |                          |                                                                                                                   | -2.6373143 down                    | -2.5506198 down                    |
|                    | CU677870                 |                                                                                                                   | -3.519375 down                     | -2.3017318 down                    |
| UCA1               | NR_015379                | urothelial cancer associated 1 (non-protein coding)                                                               | -2.7921085 down<br>-4.126632 down  | -2.8168876 down<br>-4.000587 down  |
| AKNA               | NM_030767                | AT-hook transcription factor                                                                                      | -3.446541 down                     | -5.454889 down                     |
| ATP4A              | NM_000704                | ATPase, H+/K+ exchanging, alpha polypeptide                                                                       | -3.3158548 down                    | -2.286891 down                     |
| LOC100128402       | AK124574                 | uncharacterized LOC100128402                                                                                      | -2.382179 down                     | -2.8967838 down                    |

|              |              |                                                               |                 |                 |
|--------------|--------------|---------------------------------------------------------------|-----------------|-----------------|
| DEFB132      | NM_207469    | defensin, beta 132                                            | -4.181409 down  | -2.4618776 down |
| SNX31        | NM_152628    | sorting nexin 31                                              | -4.377163 down  | -2.1604326 down |
| LOC283501    | AK093292     | uncharacterized LOC283501                                     | -5.249557 down  | -3.187564 down  |
| PTCHD2       | NM_020780    | patched domain containing 2                                   | -2.156919 down  | -2.1074114 down |
| XLOC_005165  |              |                                                               | -4.537724 down  | -5.123204 down  |
| PTPRF        | BC048416     | protein tyrosine phosphatase, receptor type, F                | -2.859115 down  | -6.87335 down   |
| ZNF550       | NM_001277092 | zinc finger protein 550                                       | -2.166701 down  | -2.3173168 down |
| HYALP1       |              | hyaluronoglucosaminidase pseudogene 1                         | -8.469493 down  | -4.87453 down   |
| PASD1        | NM_173493    | PAS domain containing 1                                       | -3.7638307 down | -3.107486 down  |
|              | AK096239     |                                                               | -2.143118 down  | -2.659365 down  |
|              | AK310283     |                                                               | -2.2995627 down | -2.2905316 down |
|              | BC022023     |                                                               | -5.1547475 down | -3.3703258 down |
|              |              |                                                               | -2.6670568 down | -2.3039758 down |
| KCNQ2        | NM_004518    | potassium voltage-gated channel, KQT-like subfamily, member 2 | -2.07185 down   | -2.6802337 down |
|              |              |                                                               | -5.377821 down  | -4.353743 down  |
| OR56A4       | NM_001005179 | olfactory receptor, family 56, subfamily A, member 4          | -2.6277683 down | -3.442417 down  |
| COL9A1       | NM_001851    | collagen, type IX, alpha 1                                    | -2.2062743 down | -2.5184052 down |
| MYCBPAP      | NM_032133    | MYCBP associated protein                                      | -2.0877862 down | -2.5466025 down |
| KCNV2        | NM_133497    | potassium channel, subfamily V, member 2                      | -2.68557 down   | -3.276973 down  |
| PRAMEF3      | NM_001013692 | PRAME family member 3                                         | -2.673795 down  | -2.3842094 down |
| ARHGAP36     | NM_144967    | Rho GTPase activating protein 36                              | -3.3971918 down | -2.4338784 down |
| POU5F1       | NM_002701    | POU class 5 homeobox 1                                        | -3.039562 down  | -2.5848484 down |
| IPO7         | NM_006391    | importin 7                                                    | -2.3144677 down | -2.1834571 down |
| LOC100132071 | AK128253     | uncharacterized LOC100132071                                  | -2.5642095 down | -2.3124185 down |
| FLJ37786     | XR_108343    | uncharacterized LOC642691                                     | -4.030967 down  | -4.214188 down  |
| FLJ43903     |              | uncharacterized LOC401471                                     | -13.164824 down | -17.184885 down |
|              |              |                                                               | -4.0000906 down | -4.050142 down  |
| OR2Y1        | NM_001001657 | olfactory receptor, family 2, subfamily Y, member 1           | -2.5017567 down | -2.3281872 down |
|              |              |                                                               | -2.2851682 down | -4.3974977 down |
| SLC30A3      | NM_003459    | solute carrier family 30 (zinc transporter), member 3         | -2.101825 down  | -3.165658 down  |
| BDNF-AS      | NR_002832    | BDNF antisense RNA                                            | -3.6844656 down | -3.3081436 down |
| CDH18        | NM_004934    | cadherin 18, type 2                                           | -3.7692652 down | -3.1158633 down |
| SGCD         | NM_000337    | sarcoglycan, delta (35kDa dystrophin-associated glycoprotein) | -5.0472403 down | -5.716335 down  |
| ABCB11       | NM_003742    | ATP-binding cassette, sub-family B (MDR/TAP), member 11       | -2.037655 down  | -2.027744 down  |
| FAM71F1      | NM_032599    | family with sequence similarity 71, member F1                 | -2.6675453 down | -2.8818603 down |
| PRDM15       | NM_022115    | PR domain containing 15                                       | -2.1434133 down | -2.5705073 down |
| NUGGC        | NM_001010906 | nuclear GTPase, germinal center associated                    | -3.313941 down  | -2.86587 down   |
| CYP24A1      | NM_000782    | cytochrome P450, family 24, subfamily A, polypeptide 1        | -6.168156 down  | -2.2484956 down |
| MUM1         | NM_032853    | melanoma associated antigen (mutated) 1                       | -3.3921714 down | -2.1086583 down |
| HELZ2        | NM_001037335 | helicase with zinc finger 2, transcriptional coactivator      | -2.6748044 down | -6.1510987 down |
| XLOC_011569  |              |                                                               | -3.9999313 down | -3.532509 down  |
|              |              |                                                               | -6.1922946 down | -3.6665282 down |
| SYNDIG1L     | NM_001105579 | synapse differentiation inducing 1-like                       | -3.2151628 down | -4.2930007 down |
| VSX1         | NM_014588    | visual system homeobox 1                                      | -2.0182288 down | -2.0050478 down |
| CECR2        | AF411609     | cat eye syndrome chromosome region, candidate 2               | -6.1551948 down | -4.5544186 down |
| LOC286154    | AK096739     | uncharacterized LOC286154                                     | -3.5007787 down | -2.5067275 down |
|              | AK172763     |                                                               | -3.6620286 down | -3.33453 down   |
| SRPX2        | NM_014467    | sushi-repeat containing protein, X-linked 2                   | -3.4255567 down | -2.1659663 down |
| TRIM43       | NM_138800    | tripartite motif containing 43                                | -2.4109194 down | -2.4103746 down |
| LOC147646    | NM_001193623 | uncharacterized LOC147646                                     | -2.1772976 down | -4.1407604 down |
|              |              |                                                               | -3.50995 down   | -4.5689235 down |
| CPNE7        | NM_014427    | copine VII                                                    | -2.1578808 down | -2.0932019 down |
| OR4F6        | NM_001005326 | olfactory receptor, family 4, subfamily F, member 6           | -4.400692 down  | -2.498925 down  |
| XLOC_014512  |              |                                                               | -3.2084534 down | -2.6798487 down |
| NTRK3-AS1    | NR_038229    | NTRK3 antisense RNA 1                                         | -6.0013185 down | -3.1906116 down |
| HIP1R        | XM_005253629 | huntingtin interacting protein 1 related                      | -3.8472257 down | -3.9575086 down |
| LOC283270    | AK091052     | uncharacterized LOC283270                                     | -3.8437066 down | -6.2427974 down |
| LOC101930441 | XM_005276062 | mucin-3A-like                                                 | -2.2318156 down | -3.0007043 down |
| GRIK2        | NM_001166247 | glutamate receptor, ionotropic, kainate 2                     | -3.3479972 down | -3.7389605 down |
| ADAMDEC1     | NM_001145271 | ADAM-like, decysin 1                                          | -4.589097 down  | -2.8370197 down |
|              |              |                                                               | -2.898056 down  | -4.2263117 down |

|              |              |                                                                                                      |                 |                 |
|--------------|--------------|------------------------------------------------------------------------------------------------------|-----------------|-----------------|
| RNF157       | NM_052916    | ring finger protein 157                                                                              | -4.5362597 down | -5.696053 down  |
| C10orf129    | NM_207321    | chromosome 10 open reading frame 129                                                                 | -2.8480814 down | -3.9808633 down |
|              |              |                                                                                                      | -2.021194 down  | -2.2515256 down |
| POM121L1P    |              | POM121 transmembrane nucleoporin-like 1, pseudogene                                                  | -3.749679 down  | -2.0600715 down |
|              |              |                                                                                                      | -2.0854013 down | -4.2592173 down |
| OR2G3        | NM_001001914 | olfactory receptor, family 2, subfamily G, member 3                                                  | -2.0783615 down | -2.050878 down  |
| SYT8         | NM_138567    | synaptotagmin VIII                                                                                   | -3.7881665 down | -2.3531735 down |
| OR7E37P      | NR_002163    | olfactory receptor, family 7, subfamily E, member 37 pseudogene                                      | -7.010088 down  | -5.2708173 down |
| LOC100130741 | AK127222     | uncharacterized LOC100130741                                                                         | -2.6621487 down | -3.072275 down  |
| FAM64A       | NM_001195228 | family with sequence similarity 64, member A                                                         | -3.9991457 down | -4.513279 down  |
| LOC100130285 | XR_243328    | uncharacterized LOC100130285                                                                         | -2.588497 down  | -3.3794758 down |
| SEMA6C       | NM_001178061 | sema domain, transmembrane domain (TM), and cytoplasmic domain, (semaphorin) 6C                      | -3.974376 down  | -3.451388 down  |
| GOLGA8EP     | NR_033350    | golgin A8 family, member E, pseudogene                                                               | -2.9001524 down | -2.189271 down  |
| NALCN        | AK094390     | sodium leak channel, non-selective                                                                   | -2.681519 down  | -3.0156343 down |
| C12orf50     | NM_152589    | chromosome 12 open reading frame 50                                                                  | -3.4775212 down | -3.3261697 down |
|              |              |                                                                                                      | -2.0930085 down | -2.0394537 down |
|              |              |                                                                                                      | -4.577794 down  | -2.3084831 down |
| LOC284412    | NR_029390    | uncharacterized LOC284412                                                                            | -2.5856466 down | -2.5562716 down |
|              | DA613845     |                                                                                                      | -2.2043633 down | -3.3073323 down |
| OR11H6       | NM_001004480 | olfactory receptor, family 11, subfamily H, member 6                                                 | -2.7578084 down | -2.2350492 down |
| TRIM51       | NM_032681    | tripartite motif-containing 51                                                                       | -3.021771 down  | -2.4483905 down |
| GLP2R        | NM_004246    | glucagon-like peptide 2 receptor                                                                     | -3.5124466 down | -2.654922 down  |
| AMMECR1      | NM_001171689 | Alport syndrome, mental retardation, midface hypoplasia and elliptocytosis chromosomal region gene 1 | -2.861841 down  | -3.9276004 down |
| KIAA0087     | NR_022006    | KIAA0087                                                                                             | -7.8302794 down | -7.228069 down  |
| LOC100131581 | AK092544     | uncharacterized LOC100131581                                                                         | -5.5654273 down | -2.8613105 down |
| KRTAP12-2    | NM_181684    | keratin associated protein 12-2                                                                      | -2.8004386 down | -2.7637467 down |
| SLC34A2      | NM_006424    | solute carrier family 34 (type II sodium/phosphate cotransporter), member 2                          | -2.90975 down   | -2.3184993 down |
|              |              |                                                                                                      | -4.152239 down  | -2.6399198 down |
|              |              |                                                                                                      | -2.1294622 down | -2.5514452 down |
| FLJ44790     | XR_109635    | uncharacterized FLJ44790                                                                             | -3.3191893 down | -2.7173836 down |
|              | AB529268     |                                                                                                      | -2.4113262 down | -2.2521598 down |
|              | AK090448     |                                                                                                      | -2.6160192 down | -2.1621234 down |
| PTH1R        | NM_000316    | parathyroid hormone 1 receptor                                                                       | -2.1189172 down | -2.3096282 down |
|              |              |                                                                                                      | -2.3642833 down | -2.1962855 down |
|              | BC028053     |                                                                                                      | -2.4468186 down | -3.2160168 down |
| MYH14        | NM_001077186 | myosin, heavy chain 14, non-muscle                                                                   | -4.300755 down  | -3.9846447 down |
| ZNF621       | NM_198484    | zinc finger protein 621                                                                              | -2.906025 down  | -3.3787754 down |
| SNAR-C3      | BF570763     | small ILF3/NF90-associated RNA C3                                                                    | -6.8305964 down | -5.299424 down  |
| XLOC_014512  |              |                                                                                                      | -5.5697865 down | -4.396531 down  |
| WDR64        | NM_144625    | WD repeat domain 64                                                                                  | -5.2395377 down | -3.1141214 down |
| SSTR4        | NM_001052    | somatostatin receptor 4                                                                              | -2.3040757 down | -2.2098005 down |
| CHRM2        | NM_001006630 | cholinergic receptor, muscarinic 2                                                                   | -2.2591429 down | -2.6866453 down |
| WFIKKN2      | NM_175575    | WAP, follistatin/kazal, immunoglobulin, kunitz and netrin domain containing 2                        | -3.320794 down  | -4.5092516 down |
|              |              |                                                                                                      | -2.8171134 down | -2.4341285 down |
| C17orf104    | BC035159     | chromosome 17 open reading frame 104                                                                 | -2.8501248 down | -2.8974319 down |
| SUSD2        | NM_019601    | sushi domain containing 2                                                                            | -2.470507 down  | -2.9208345 down |
| AKAP12       | NM_144497    | A kinase (PRKA) anchor protein 12                                                                    | -3.1571686 down | -2.039172 down  |
|              |              |                                                                                                      | -2.6902053 down | -2.8659291 down |
| CXCL14       | NM_004887    | chemokine (C-X-C motif) ligand 14                                                                    | -4.384196 down  | -2.5581894 down |
|              |              |                                                                                                      | -4.000027 down  | -2.7704477 down |
| MEGF8        | NM_001271938 | multiple EGF-like-domains 8                                                                          | -2.224648 down  | -3.1479897 down |
| EXD1         | NM_152596    | exonuclease 3'-5' domain containing 1                                                                | -2.7454815 down | -4.3647523 down |
|              |              |                                                                                                      | -2.4035234 down | -2.8587263 down |
| MAML3        | NM_018717    | mastermind-like 3 (Drosophila)                                                                       | -6.9032307 down | -15.053548 down |
| LAMA4        | NM_001105207 | laminin, alpha 4                                                                                     | -2.6171181 down | -4.858686 down  |
| FLJ13773     | AK023835     | uncharacterized LOC246318                                                                            | -3.1289072 down | -2.103998 down  |
| NLGN2        | NM_020795    | neuroligin 2                                                                                         | -2.3548706 down | -2.5072322 down |
|              |              |                                                                                                      | -4.491011 down  | -2.7703223 down |
| MUC6         | AK092533     | mucin 6, oligomeric mucus/gel-forming                                                                | -3.4253206 down | -2.2798593 down |

|              |              |                                                                                                       |                 |                 |
|--------------|--------------|-------------------------------------------------------------------------------------------------------|-----------------|-----------------|
| STH          | NM_001007532 | saitohin                                                                                              | -6.309312 down  | -4.316842 down  |
|              |              |                                                                                                       | -3.9920168 down | -2.496098 down  |
| HAAO         |              | 3-hydroxyanthranilate 3,4-dioxygenase                                                                 | -5.3837333 down | -5.9729013 down |
|              | AF068294     |                                                                                                       | -4.2279806 down | -4.3153763 down |
| GNAL         | NM_182978    | guanine nucleotide binding protein (G protein), alpha activating activity polypeptide, olfactory type | -3.1100879 down | -2.8628473 down |
| PPP6R2       | AK024148     | protein phosphatase 6, regulatory subunit 2                                                           | -4.283714 down  | -5.953941 down  |
| UGT2B7       | NM_001074    | UDP glucuronosyltransferase 2 family, polypeptide B7                                                  | -3.3240469 down | -4.2031784 down |
| DBX1         | NM_001029865 | developing brain homeobox 1                                                                           | -3.3425362 down | -2.674685 down  |
| BUB1B        | NM_001211    | BUB1 mitotic checkpoint serine/threonine kinase B                                                     | -3.9039443 down | -4.010965 down  |
| DDB1         |              | damage-specific DNA binding protein 1, 127kDa                                                         | -3.287064 down  | -2.6218011 down |
| LZTS1        | NM_021020    | leucine zipper, putative tumor suppressor 1                                                           | -2.017927 down  | -2.11839 down   |
|              |              |                                                                                                       | -4.0435286 down | -3.8491814 down |
| SPPL2C       | NM_175882    | signal peptide peptidase like 2C                                                                      | -3.5815568 down | -3.3487146 down |
| CLEC6A       | NM_001007033 | C-type lectin domain family 6, member A                                                               | -4.035783 down  | -3.0251372 down |
| PARPBP       | NM_017915    | PARP1 binding protein                                                                                 | -5.487618 down  | -7.67942 down   |
| TRIM61       | NM_001012414 | tripartite motif containing 61                                                                        | -2.4182298 down | -2.1925528 down |
| XLOC_008300  |              |                                                                                                       | -2.6192105 down | -2.2568557 down |
| PRM2         | NM_001286359 | protamine 2                                                                                           | -2.3511887 down | -2.4658096 down |
|              |              |                                                                                                       | -2.8285642 down | -2.1807523 down |
| TWIST1       | NM_000474    | twist family bHLH transcription factor 1                                                              | -2.9219046 down | -2.3576634 down |
| CELA3A       | NM_005747    | chymotrypsin-like elastase family, member 3A                                                          | -3.4059 down    | -2.2357085 down |
| TCEB3C       | NM_145653    | transcription elongation factor B polypeptide 3C (elongin A3)                                         | -9.024723 down  | -8.311952 down  |
| NRG2         | AK124504     | neuregulin 2                                                                                          | -2.7005093 down | -2.7202995 down |
| C6orf201     | NM_001085401 | chromosome 6 open reading frame 201                                                                   | -2.4032972 down | -2.1229281 down |
| CIDEA        | NM_001279    | cell death-inducing DFFA-like effector a                                                              | -2.5417988 down | -5.287442 down  |
| CHD5         | NM_015557    | chromodomain helicase DNA binding protein 5                                                           | -4.255513 down  | -2.7657988 down |
| KRTAP10-4    | NM_198687    | keratin associated protein 10-4                                                                       | -2.3867939 down | -4.6243157 down |
| NPL          | BC034966     | N-acetylneuraminatase pyruvate lyase (dihydrodipicolinate synthase)                                   | -2.9103768 down | -2.38428 down   |
| OVOL2        | NM_021220    | ovo-like zinc finger 2                                                                                | -3.847198 down  | -3.4602869 down |
| TMEM257      | NM_004709    | transmembrane protein 257                                                                             | -4.6702285 down | -2.5168185 down |
|              |              |                                                                                                       | -3.7606943 down | -3.6310387 down |
| DEFB136      | NM_001033018 | defensin, beta 136                                                                                    | -2.0803308 down | -2.5463066 down |
| MRP63        | NM_024026    | mitochondrial ribosomal protein 63                                                                    | -4.125595 down  | -2.5852232 down |
| TPT1-AS1     | NR_024458    | TPT1 antisense RNA 1                                                                                  | -2.1273007 down | -2.055494 down  |
| NTF4         | NM_006179    | neurotrophin 4                                                                                        | -4.8414006 down | -2.2685297 down |
| FADS6        | NM_178128    | fatty acid desaturase 6                                                                               | -3.189713 down  | -5.106219 down  |
|              |              |                                                                                                       | -2.7428076 down | -2.7674096 down |
|              | AK074630     |                                                                                                       | -2.150738 down  | -3.5783901 down |
| ZBTB12       | NM_181842    | zinc finger and BTB domain containing 12                                                              | -2.7510123 down | -2.2155778 down |
| CRYBB2P1     |              | crystallin, beta B2 pseudogene 1                                                                      | -3.8412104 down | -2.578034 down  |
| AGMO         | NM_001004320 | alkylglycerol monooxygenase                                                                           | -2.0152147 down | -2.9283755 down |
| BRSK1        | NM_032430    | BR serine/threonine kinase 1                                                                          | -4.4639883 down | -3.3366559 down |
|              | CU677925     |                                                                                                       | -3.4826844 down | -2.1556482 down |
| NPW          | NM_001099456 | neuropeptide W                                                                                        | -3.3776999 down | -2.8928888 down |
| LMX1A        | NM_177398    | LIM homeobox transcription factor 1, alpha                                                            | -3.3338974 down | -2.7074177 down |
| GJA5         | NM_005266    | gap junction protein, alpha 5, 40kDa                                                                  | -3.6569626 down | -2.4397182 down |
|              |              |                                                                                                       | -2.6388934 down | -3.1679533 down |
|              |              |                                                                                                       | -2.7665997 down | -2.2375312 down |
| OR4F4        | NM_001004195 | olfactory receptor, family 4, subfamily F, member 4                                                   | -2.8472764 down | -2.2719133 down |
| NUTM1        | NM_175741    | NUT midline carcinoma, family member 1                                                                | -4.030192 down  | -3.0860043 down |
| LRP11        | XM_005267168 | low density lipoprotein receptor-related protein 11                                                   | -3.7708538 down | -2.8726544 down |
|              |              |                                                                                                       | -2.2673814 down | -3.8446653 down |
| DNAAF2       | NM_001083908 | dynein, axonemal, assembly factor 2                                                                   | -2.21681 down   | -2.1570506 down |
| LOC100287225 | NR_040075    | uncharacterized LOC100287225                                                                          | -4.758138 down  | -2.439124 down  |
| GVINP1       | NR_003945    | GTPase, very large interferon inducible pseudogene 1                                                  | -2.0340738 down | -2.1592197 down |
| HOMER1       |              | homer homolog 1 (Drosophila)                                                                          | -5.7913218 down | -3.095869 down  |
| ROBO2        | NM_002942    | roundabout, axon guidance receptor, homolog 2 (Drosophila)                                            | -4.7293706 down | -4.242307 down  |
| GLI2         | NM_005270    | GLI family zinc finger 2                                                                              | -2.6989348 down | -2.0886974 down |
| TGM7         | NM_052955    | transglutaminase 7                                                                                    | -2.994587 down  | -2.6584141 down |
| ZNF749       | NM_001023561 | zinc finger protein 749                                                                               | -3.815186 down  | -2.2963426 down |

|              |              |                                                                      |                 |                  |
|--------------|--------------|----------------------------------------------------------------------|-----------------|------------------|
| FGF7         |              | fibroblast growth factor 7                                           | -5.7991605 down | -3.1798081 down  |
| LOC100129518 | NR_037166    | uncharacterized LOC100129518                                         | -4.2684283 down | -3.0518596 down  |
| VWA5B2       | NM_138345    | von Willebrand factor A domain containing 5B2                        | -2.6401281 down | -2.3341541 down  |
| MUC22        | NM_001198815 | mucin 22                                                             | -4.3170433 down | -2.1166081 down  |
| NAG20        | AF210649     | NAG20                                                                | -9.043121 down  | -10.061569 down  |
|              | AK129565     |                                                                      | -4.1287208 down | -4.287017 down   |
| MPP2         | NM_001278381 | membrane protein, palmitoylated 2 (MAGUK p55 subfamily member 2)     | -2.1509416 down | -2.9756818 down  |
| SOX10        | NM_006941    | SRY (sex determining region Y)-box 10                                | -2.0350943 down | -2.019094 down   |
| LACTBL1      | XM_003846622 | lactamase, beta-like 1                                               | -2.6398363 down | -2.4899201 down  |
| FLJ46361     |              | deleted in malignant brain tumors 1 pseudogene                       | -3.599743 down  | -2.379761 down   |
| LOC650293    | NM_001040071 | seven transmembrane helix receptor                                   | -5.6999173 down | -3.1572661 down  |
| ACSS3        | NM_024560    | acyl-CoA synthetase short-chain family member 3                      | -2.5697956 down | -2.8812094 down  |
|              | AF384996     |                                                                      | -3.3046668 down | -3.1008523 down  |
| P4HA2        | NM_001017973 | prolyl 4-hydroxylase, alpha polypeptide II                           | -2.3412817 down | -2.0589087 down  |
| XLOC_014512  |              |                                                                      | -2.1736803 down | -3.4896889 down  |
| RHBDL2       | NM_017821    | rhomboid, veinlet-like 2 (Drosophila)                                | -3.181914 down  | -2.0552807 down  |
| BCL2L10      | NM_020396    | BCL2-like 10 (apoptosis facilitator)                                 | -8.181561 down  | -5.0572643 down  |
| LINC00235    | NR_024121    | long intergenic non-protein coding RNA 235                           | -4.40941 down   | -2.086108 down   |
| LOC100128498 | AK126742     | uncharacterized LOC100128498                                         | -2.9709055 down | -2.821145 down   |
|              | XM_001714385 |                                                                      | -2.2547572 down | -3.4506288 down  |
| RBM33        | NM_053043    | RNA binding motif protein 33                                         | -2.0423963 down | -2.5258825 down  |
|              |              |                                                                      | -3.2855985 down | -3.0081782 down  |
| CDX1         | NM_001804    | caudal type homeobox 1                                               | -3.1783936 down | -2.900254 down   |
|              |              |                                                                      | -2.5416565 down | -3.316415 down   |
| TXLNB        |              | taxilin beta                                                         | -6.5075784 down | -2.9084172 down  |
|              | BC004968     |                                                                      | -11.480335 down | -14.663246 down  |
| CATSPER2     |              | cation channel, sperm associated 2                                   | -3.9929798 down | -5.412927 down   |
| FAM9B        | NM_205849    | family with sequence similarity 9, member B                          | -2.8020952 down | -2.0680704 down  |
| PHKG1        | NM_001258459 | phosphorylase kinase, gamma 1 (muscle)                               | -3.249507 down  | -3.820593 down   |
| VSX1         | NM_199425    | visual system homeobox 1                                             | -2.022524 down  | -2.3420432 down  |
|              | BC015443     |                                                                      | -2.2768896 down | -3.1130645 down  |
| SYPL2        | NM_001040709 | synaptophysin-like 2                                                 | -5.377401 down  | -5.0311785 down  |
| PTPRC        | NM_002838    | protein tyrosine phosphatase, receptor type, C                       | -2.037058 down  | -2.4676294 down  |
|              |              |                                                                      | -2.864905 down  | -3.6696165 down  |
| FLJ13224     | NR_026806    | uncharacterized LOC79857                                             | -2.764445 down  | -3.3484845 down  |
| GRIP1        | NM_021150    | glutamate receptor interacting protein 1                             | -3.5788162 down | -3.6491559 down  |
| FGF3         | NM_005247    | fibroblast growth factor 3                                           | -11.292002 down | -13.7881565 down |
| BCL2         | NM_000657    | B-cell CLL/lymphoma 2                                                | -2.2831893 down | -2.037091 down   |
| ADCY1        | NM_021116    | adenylate cyclase 1 (brain)                                          | -4.2855544 down | -3.6959312 down  |
| MRPS16       | NM_016065    | mitochondrial ribosomal protein S16                                  | -3.8599627 down | -2.248775 down   |
|              |              |                                                                      | -3.9068456 down | -2.9753563 down  |
| CPN2         | NM_001080513 | carboxypeptidase N, polypeptide 2                                    | -2.4232342 down | -3.211302 down   |
|              |              |                                                                      | -3.1515028 down | -3.5383708 down  |
| HOXA7        | NM_006896    | homeobox A7                                                          | -4.500766 down  | -3.1903841 down  |
| SUPT20HL1    | NM_001136234 | suppressor of Ty 20 homolog (S. cerevisiae)-like 1                   | -3.2862632 down | -4.0409393 down  |
|              |              |                                                                      | -5.885245 down  | -4.13544 down    |
|              |              |                                                                      | -2.0515213 down | -2.275369 down   |
| EML2         | NM_012155    | echinoderm microtubule associated protein like 2                     | -2.2590485 down | -2.432665 down   |
| LOC100272216 |              | uncharacterized LOC100272216                                         | -3.3476305 down | -3.7766654 down  |
|              |              |                                                                      | -2.5488825 down | -2.5882592 down  |
| PPAPDC1A     | NM_001030059 | phosphatidic acid phosphatase type 2 domain containing 1A            | -3.092788 down  | -2.0184798 down  |
| MYL10        | NM_138403    | myosin, light chain 10, regulatory                                   | -4.2693377 down | -2.9560215 down  |
| DPM3         | NM_018973    | dolichyl-phosphate mannosyltransferase polypeptide 3                 | -2.650582 down  | -2.4301288 down  |
| SYTL5        | NM_138780    | synaptotagmin-like 5                                                 | -2.0972455 down | -2.0588367 down  |
| AWAT2        | NM_001002254 | acyl-CoA wax alcohol acyltransferase 2                               | -2.1516817 down | -2.237796 down   |
|              |              |                                                                      | -2.5261834 down | -6.600277 down   |
| ANP32A-IT1   | NR_026808    | ANP32A intronic transcript 1 (non-protein coding)                    | -4.6453705 down | -2.7897952 down  |
| DST          | NM_001723    | dystonin                                                             | -2.146557 down  | -3.4785645 down  |
| CFHR4        | NM_006684    | complement factor H-related 4                                        | -4.3196845 down | -2.4945016 down  |
| NYAP2        | NM_020864    | neuronal tyrosine-phosphorylated phosphoinositide-3-kinase adaptor 2 | -2.5273674 down | -2.1306896 down  |

|              |              |                                                                                 |                 |                 |
|--------------|--------------|---------------------------------------------------------------------------------|-----------------|-----------------|
| SLC13A3      | NM_001193339 | solute carrier family 13 (sodium-dependent dicarboxylate transporter), member 3 | -3.0832705 down | -2.5012276 down |
| CNTN4        | NM_175613    | contactin 4                                                                     | -3.6705587 down | -2.3370209 down |
| LINC00839    | NR_026827    | long intergenic non-protein coding RNA 839                                      | -3.2451005 down | -2.203354 down  |
|              |              |                                                                                 | -4.947109 down  | -2.8130136 down |
| RFPL3S       | NR_001450    | RFPL3 antisense                                                                 | -2.3393514 down | -2.4599001 down |
| PYY          | NM_004160    | peptide YY                                                                      | -2.381993 down  | -2.8745625 down |
| XLOC_014512  |              |                                                                                 | -7.3024993 down | -4.6487794 down |
| CCDC64B      | NM_001103175 | coiled-coil domain containing 64B                                               | -7.086797 down  | -8.239313 down  |
| PDZD7        | NM_001195263 | PDZ domain containing 7                                                         | -3.483815 down  | -2.757152 down  |
| SORCS3       | NM_014978    | sortilin-related VPS10 domain containing receptor 3                             | -7.4999743 down | -4.1854196 down |
| LOC100129027 | NR_038876    | uncharacterized LOC100129027                                                    | -2.9324067 down | -2.3324537 down |
| CDC27        | NM_001114091 | cell division cycle 27                                                          | -3.3529873 down | -3.5207305 down |
| PSMD10       |              | proteasome (prosome, macropain) 26S subunit, non-ATPase, 10                     | -11.659073 down | -4.215822 down  |
| ZNF160       | XM_005259381 | zinc finger protein 160                                                         | -4.386037 down  | -2.535495 down  |
| KCNK13       | NM_022054    | potassium channel, subfamily K, member 13                                       | -3.3013327 down | -4.140283 down  |
| STAM         | NM_003473    | signal transducing adaptor molecule (SH3 domain and ITAM motif) 1               | -2.2100203 down | -3.2446482 down |
| MPZ          | NM_000530    | myelin protein zero                                                             | -3.2613645 down | -2.3164196 down |
| ARMCX4       |              | armadillo repeat containing, X-linked 4                                         | -4.0474944 down | -4.506873 down  |
| IL1RAPL1     | NM_014271    | interleukin 1 receptor accessory protein-like 1                                 | -2.798176 down  | -4.7195106 down |
| AK9          | AK124171     | adenylate kinase 9                                                              | -2.8478622 down | -2.4501972 down |
| PCNXL4       | AK095489     | pecanex-like 4 (Drosophila)                                                     | -8.512695 down  | -3.2413363 down |
| FLNC         | NM_001458    | filamin C, gamma                                                                | -4.6592126 down | -2.333547 down  |
| GRK1         | NM_002929    | G protein-coupled receptor kinase 1                                             | -3.3471928 down | -2.9543786 down |
| C17orf72     | NM_001164257 | chromosome 17 open reading frame 72                                             | -3.8624935 down | -4.932738 down  |
| LOC286238    | NM_001100111 | uncharacterized LOC286238                                                       | -7.003478 down  | -3.359222 down  |
| CFL1P1       |              | cofilin 1 (non-muscle) pseudogene 1                                             | -5.7603097 down | -4.1626306 down |
|              | BC131768     |                                                                                 | -6.988259 down  | -14.568469 down |
| ST8SIA3      | NM_015879    | ST8 alpha-N-acetyl-neuraminide alpha-2,8-sialyltransferase 3                    | -2.3533812 down | -2.969064 down  |
| C7orf13      | NR_026865    | chromosome 7 open reading frame 13                                              | -4.130074 down  | -3.7078924 down |
| SUSD2        | NM_019601    | sushi domain containing 2                                                       | -4.8122654 down | -3.070956 down  |
|              |              |                                                                                 | -2.4343324 down | -4.772648 down  |
| XLOC_014512  |              |                                                                                 | -4.8459706 down | -6.020332 down  |
| SNAI2        | NM_003068    | snail family zinc finger 2                                                      | -3.4664352 down | -3.1396892 down |
| TSSK3        | NM_052841    | testis-specific serine kinase 3                                                 | -2.5004082 down | -2.4604442 down |
| KCNQ1DN      |              | KCNQ1 downstream neighbor (non-protein coding)                                  | -2.4163675 down | -2.7120717 down |
| DAAM2        | BC078153     | dishevelled associated activator of morphogenesis 2                             | -2.64459 down   | -3.612623 down  |
| SLC51B       | NM_178859    | solute carrier family 51, beta subunit                                          | -4.014045 down  | -3.0954852 down |
| UPK3A        | NM_006953    | uroplakin 3A                                                                    | -3.8951068 down | -4.2959294 down |
| HNRNPU-AS1   | NR_026778    | HNRNPU antisense RNA 1                                                          | -2.090377 down  | -2.758113 down  |
|              |              |                                                                                 | -4.898429 down  | -4.649454 down  |
| KRTAP5-3     | NM_001012708 | keratin associated protein 5-3                                                  | -4.750036 down  | -3.4099417 down |
|              |              |                                                                                 | -4.8345633 down | -3.400303 down  |
| C2orf61      | NM_173649    | chromosome 2 open reading frame 61                                              | -2.4952595 down | -4.651796 down  |
| KCNT1        | AK123276     | potassium channel, subfamily T, member 1                                        | -5.199707 down  | -3.4384925 down |
|              | XR_245740    |                                                                                 | -3.2351213 down | -3.3209505 down |
| CEACAM5      | NM_004363    | carcinoembryonic antigen-related cell adhesion molecule 5                       | -3.2936344 down | -2.1425428 down |
|              |              |                                                                                 | -3.8236752 down | -3.2922227 down |
|              |              |                                                                                 | -2.5795133 down | -2.3078423 down |
| TEX41        |              | testis expressed 41 (non-protein coding)                                        | -2.1533556 down | -2.6219852 down |
| CD164L2      |              | CD164 sialomucin-like 2                                                         | -3.2204216 down | -2.5628273 down |
|              |              |                                                                                 | -4.3016853 down | -4.1499066 down |
| LOC100130193 | AK096102     | uncharacterized LOC100130193                                                    | -2.3975291 down | -4.886785 down  |
| ADAMTSL1     | NM_001040272 | ADAMTS-like 1                                                                   | -2.007045 down  | -2.7540135 down |
| SLC35F1      | NM_001029858 | solute carrier family 35, member F1                                             | -2.1552486 down | -2.722175 down  |
| MMP24        | NM_006690    | matrix metalloproteinase 24 (membrane-inserted)                                 | -3.4404671 down | -2.19764 down   |
| NFIB         | NM_005596    | nuclear factor I/B                                                              | -3.01854 down   | -2.010619 down  |
| BTBD9        | NM_052893    | BTB (POZ) domain containing 9                                                   | -5.525792 down  | -3.1878254 down |
|              | AY203961     |                                                                                 | -4.81801 down   | -2.5608068 down |
| C1orf86      | AK054818     | chromosome 1 open reading frame 86                                              | -2.7995405 down | -4.3577604 down |
|              |              |                                                                                 | -4.967905 down  | -4.784889 down  |

|              |              |                                                                       |                 |                 |
|--------------|--------------|-----------------------------------------------------------------------|-----------------|-----------------|
| MGC34800     | XR_110135    | uncharacterized protein MGC34800                                      | -2.4075873 down | -2.3042676 down |
| ZNF385C      | AK128007     | zinc finger protein 385C                                              | -2.3752508 down | -4.192814 down  |
|              |              |                                                                       | -3.560824 down  | -2.6761942 down |
| USP2         | NM_004205    | ubiquitin specific peptidase 2                                        | -4.0459924 down | -2.1656077 down |
|              | XR_244450    |                                                                       | -4.0777574 down | -2.3239396 down |
| TUBG2        | NM_016437    | tubulin, gamma 2                                                      | -2.3899364 down | -3.9754875 down |
| XLOC_014512  |              |                                                                       | -3.7147028 down | -2.9490306 down |
| MEP1A        | NM_005588    | mepirin A, alpha (PABA peptide hydrolase)                             | -2.7293026 down | -4.245633 down  |
| SDC3         | NM_014654    | syndecan 3                                                            | -2.6710043 down | -2.348735 down  |
| PTPRK        | NM_002844    | protein tyrosine phosphatase, receptor type, K                        | -2.1162932 down | -2.455539 down  |
| TRAPPC3L     | AK002042     | trafficking protein particle complex 3-like                           | -3.0332775 down | -2.6196525 down |
| FCRL5        | NM_001195388 | Fc receptor-like 5                                                    | -2.545056 down  | -5.0250344 down |
|              | AK026419     |                                                                       | -5.6002483 down | -2.4700818 down |
| LOC100131195 | AK097743     | uncharacterized LOC100131195                                          | -2.0920508 down | -4.797982 down  |
|              |              |                                                                       | -2.7286146 down | -3.0460346 down |
| LEPROTL1     | NM_001128208 | leptin receptor overlapping transcript-like 1                         | -2.7332027 down | -4.4890656 down |
| RAB7A        | AF119891     | RAB7A, member RAS oncogene family                                     | -3.1113956 down | -2.522849 down  |
|              |              |                                                                       | -5.0724645 down | -5.2356024 down |
|              |              |                                                                       | -3.3808103 down | -2.2561421 down |
|              |              |                                                                       | -2.9529443 down | -4.5816 down    |
| DOK7         | XM_005247956 | docking protein 7                                                     | -2.4975963 down | -4.1738076 down |
| BIRC7        | NM_022161    | baculoviral IAP repeat containing 7                                   | -2.1600926 down | -3.8651798 down |
| CHRNA2       | NM_000742    | cholinergic receptor, nicotinic, alpha 2 (neuronal)                   | -2.3879519 down | -4.3793488 down |
| IGFALS       | NM_004970    | insulin-like growth factor binding protein, acid labile subunit       | -3.5575476 down | -3.3129983 down |
|              |              |                                                                       | -2.8758028 down | -3.6051116 down |
| LOC388882    | XR_109751    | uncharacterized LOC388882                                             | -2.563767 down  | -3.3496366 down |
| HPX-2        | X74861       | homeobox HPX-2                                                        | -2.4647527 down | -3.8764646 down |
|              |              |                                                                       | -2.8099236 down | -4.3805804 down |
| GPR52        | NM_005684    | G protein-coupled receptor 52                                         | -3.045984 down  | -2.719857 down  |
| LOC401176    | BC043001     | uncharacterized LOC401176                                             | -2.0356565 down | -2.3629441 down |
|              | XR_132593    |                                                                       | -5.3166018 down | -2.2071903 down |
| FAM215A      | NR_026770    | family with sequence similarity 215, member A (non-protein coding)    | -2.2663 down    | -2.3708618 down |
| TNRC6C       | NM_001142640 | trinucleotide repeat containing 6C                                    | -2.366664 down  | -3.187599 down  |
| CDRT1        | NM_006382    | CMT1A duplicated region transcript 1                                  | -3.6224349 down | -2.9550984 down |
|              |              |                                                                       | -2.2238503 down | -2.8204217 down |
| PRDM15       | NM_022115    | PR domain containing 15                                               | -3.539146 down  | -2.4915326 down |
| LOC728586    | XR_159059    | hCG1981531                                                            | -4.7047973 down | -2.68227 down   |
| DDX31        | NM_138620    | DEAD (Asp-Glu-Ala-Asp) box polypeptide 41                             | -2.4094048 down | -2.0697954 down |
|              |              |                                                                       | -4.824043 down  | -3.0591376 down |
| NANOS2       | NM_001029861 | nanos homolog 2 (Drosophila)                                          | -2.2167985 down | -3.2480094 down |
| LOC100130417 |              | uncharacterized LOC100130417                                          | -2.2563155 down | -2.8546896 down |
| TRIM48       | NM_024114    | tripartite motif containing 48                                        | -4.441204 down  | -3.0246205 down |
| SERHL2       | NM_014509    | serine hydrolase-like 2                                               | -3.8752592 down | -2.3131166 down |
|              | CU692621     |                                                                       | -2.2269025 down | -2.4917176 down |
| HMGB3        | NM_005342    | high mobility group box 3                                             | -2.2475595 down | -2.2783196 down |
|              | AK127494     |                                                                       | -4.1838593 down | -3.993354 down  |
| FBXL22       | NM_203373    | F-box and leucine-rich repeat protein 22                              | -2.4989083 down | -3.2706625 down |
|              |              |                                                                       | -4.155539 down  | -2.1899219 down |
| PHGR1        | NM_001145643 | proline/histidine/glycine-rich 1                                      | -2.2858489 down | -2.3261058 down |
| LOC729159    | NM_001282301 | UPF0607 protein ENSP00000381418-like                                  | -4.5937133 down | -4.1811337 down |
| LOC100134868 | NR_004846    | uncharacterized LOC100134868                                          | -3.5268638 down | -2.9018774 down |
| ADARB2       | AK289895     | adenosine deaminase, RNA-specific, B2 (non-functional)                | -2.7499673 down | -2.1572196 down |
| SLC22A13     | NM_004256    | solute carrier family 22 (organic anion/urate transporter), member 13 | -4.99975 down   | -8.378844 down  |
| KLHL14       | XM_005258322 | kelch-like family member 14                                           | -4.626692 down  | -2.8605113 down |
| MAP4         | NM_030885    | microtubule-associated protein 4                                      | -2.4157965 down | -3.695181 down  |
| SNORA26      | AI792523     | small nucleolar RNA, H/ACA box 26                                     | -2.7077954 down | -3.5881493 down |
| DNASE1       | NM_005223    | deoxyribonuclease I                                                   | -2.2552814 down | -2.3602126 down |
| GATA4        | NM_002052    | GATA binding protein 4                                                | -3.0824058 down | -2.032713 down  |
| FRG2C        | NM_001124759 | FSHD region gene 2 family, member C                                   | -3.4860063 down | -4.7455025 down |
| ASIC2        |              | acid-sensing (proton-gated) ion channel 2                             | -6.6445665 down | -3.7661602 down |
| XLOC_006444  |              |                                                                       | -2.554289 down  | -2.5732157 down |



|                    |              |                                                                                         |            |      |            |      |
|--------------------|--------------|-----------------------------------------------------------------------------------------|------------|------|------------|------|
| SNORA80            | DB304787     | small nucleolar RNA, H/ACA box 80                                                       | -3.5858228 | down | -4.2207484 | down |
| ZNF720             | XM_005255752 | zinc finger protein 720                                                                 | -3.6915834 | down | -2.0350087 | down |
| XLOC_014512        |              |                                                                                         | -3.233398  | down | -3.0234857 | down |
| PDLIM4             | NM_003687    | PDZ and LIM domain 4                                                                    | -3.2684553 | down | -3.443663  | down |
| GLTPD1             | NM_001029885 | glycolipid transfer protein domain containing 1                                         | -3.2156906 | down | -4.349214  | down |
|                    |              |                                                                                         | -2.7814844 | down | -3.0453532 | down |
| GALNTL6            | NM_001034845 | UDP-N-acetyl-alpha-D-galactosamine:polypeptide N-acetylgalactosaminyltransferase-like 6 | -3.1167448 | down | -2.4416559 | down |
| LOC100128946       | NR_038944    | uncharacterized LOC100128946                                                            | -2.2885587 | down | -2.120539  | down |
| C10orf91           | NM_173541    | chromosome 10 open reading frame 91                                                     | -2.6343257 | down | -2.202203  | down |
|                    |              |                                                                                         | -6.7362247 | down | -2.1661677 | down |
| SH3GL3             | AF036272     | SH3-domain GRB2-like 3                                                                  | -9.720975  | down | -3.3240488 | down |
| GABRE              | NM_004961    | gamma-aminobutyric acid (GABA) A receptor, epsilon                                      | -5.865793  | down | -4.76355   | down |
| BRD7P3             | NR_002730    | bromodomain containing 7 pseudogene 3                                                   | -3.7400136 | down | -3.635799  | down |
|                    | XR_112948    |                                                                                         | -4.5553465 | down | -2.3863375 | down |
|                    |              |                                                                                         | -5.201958  | down | -2.5900695 | down |
| FZD4               | NM_012193    | frizzled family receptor 4                                                              | -2.4081843 | down | -2.6502554 | down |
| OLFML3             | NM_020190    | olfactomedin-like 3                                                                     | -3.3830307 | down | -2.7830617 | down |
| SH3BP5L            | AK125138     | SH3-binding domain protein 5-like                                                       | -3.603822  | down | -4.087898  | down |
| TECRL              | NM_001010874 | trans-2,3-enoyl-CoA reductase-like                                                      | -5.822932  | down | -3.893835  | down |
| MAGIX              | NM_024859    | MAGI family member, X-linked                                                            | -3.5742652 | down | -2.5316963 | down |
| LOC541473          | NR_003602    | FK506 binding protein 6, 36kDa pseudogene                                               | -3.3182943 | down | -2.1551108 | down |
| SLC2A6             | NM_017585    | solute carrier family 2 (facilitated glucose transporter), member 6                     | -2.7849984 | down | -2.6380157 | down |
| SLC18A1            | NM_001142325 | solute carrier family 18 (vesicular monoamine transporter), member 1                    | -2.673114  | down | -3.7324808 | down |
| DNAJB3             | NM_001001394 | DnaJ (Hsp40) homolog, subfamily B, member 3                                             | -6.209302  | down | -4.1020045 | down |
| PTGER1             | NM_000955    | prostaglandin E receptor 1 (subtype EP1), 42kDa                                         | -5.4906716 | down | -5.4921627 | down |
| CAPN5              | NM_004055    | calpain 5                                                                               | -2.9290805 | down | -2.5296283 | down |
|                    |              |                                                                                         | -2.4156694 | down | -2.2140472 | down |
|                    |              |                                                                                         | -2.5095646 | down | -3.1748285 | down |
|                    |              |                                                                                         | -3.7195191 | down | -2.0138168 | down |
|                    |              |                                                                                         | -4.727455  | down | -4.1788774 | down |
| ACTL7B             | NM_006686    | actin-like 7B                                                                           | -3.5372226 | down | -2.1480823 | down |
| LOC441493          | XR_246724    | uncharacterized LOC441493                                                               | -4.1309505 | down | -2.3391201 | down |
| KRTAP4-5           | NM_033188    | keratin associated protein 4-5                                                          | -3.2040782 | down | -2.0711207 | down |
| CHIC1              | NM_001039840 | cysteine-rich hydrophobic domain 1                                                      | -2.3631287 | down | -2.7092931 | down |
| DNAJC14            | NM_032364    | DnaJ (Hsp40) homolog, subfamily C, member 14                                            | -2.2589595 | down | -2.3243752 | down |
|                    | BC035844     |                                                                                         | -4.4034514 | down | -5.0251207 | down |
| PTGER4P2-CDK2AP2P2 | NR_024496    | PTGER4P2-CDK2AP2P2 readthrough transcribed pseudogene                                   | -3.3345542 | down | -3.8294752 | down |
| SCN4B              | NM_174934    | sodium channel, voltage-gated, type IV, beta subunit                                    | -2.3026211 | down | -4.41341   | down |
| HECW1-IT1          | AK093262     | HECW1 intronic transcript 1 (non-protein coding)                                        | -4.673794  | down | -2.8677733 | down |
| ANKRD20A2          | NM_001012421 | ankyrin repeat domain 20 family, member A2                                              | -4.2440553 | down | -3.1776767 | down |
| DPYSL3             | NM_001387    | dihydropyrimidinase-like 3                                                              | -5.1374197 | down | -7.8794856 | down |
| LINC00893          |              | long intergenic non-protein coding RNA 893                                              | -3.073363  | down | -2.4553752 | down |
|                    | AK091705     |                                                                                         | -3.2365527 | down | -2.938854  | down |
| NPAS3              | NM_022123    | neuronal PAS domain protein 3                                                           | -2.8375876 | down | -2.5736332 | down |
| RAP1GAP            |              | RAP1 GTPase activating protein                                                          | -3.0960302 | down | -3.8229792 | down |
| FOXD4L2            | NM_001099279 | forkhead box D4-like 2                                                                  | -3.7543197 | down | -4.9400506 | down |
| ROR1               | NM_001083592 | receptor tyrosine kinase-like orphan receptor 1                                         | -2.3358982 | down | -3.349082  | down |
| JPH2               | NM_020433    | junctophilin 2                                                                          | -2.3735423 | down | -2.6826003 | down |
| LOC100134368       | NR_024453    | uncharacterized LOC100134368                                                            | -5.7505503 | down | -3.5742295 | down |
| SERP1              | AK125413     | stress-associated endoplasmic reticulum protein 1                                       | -2.510614  | down | -2.0096798 | down |
| ZNF667             | NM_022103    | zinc finger protein 667                                                                 | -3.8506627 | down | -3.8127968 | down |
|                    |              |                                                                                         | -2.5004954 | down | -2.629157  | down |
|                    |              |                                                                                         | -5.3656635 | down | -3.5300465 | down |
| ASCL1              | NM_004316    | achaete-scute family bHLH transcription factor 1                                        | -2.1384103 | down | -2.3816438 | down |
| KIAA1984           | NM_001039374 | KIAA1984                                                                                | -3.7728004 | down | -4.78533   | down |
| UROC1              | NM_144639    | urocanate hydratase 1                                                                   | -2.3174648 | down | -2.5256565 | down |
| DUOX2              | NM_014080    | dual oxidase 2                                                                          | -2.4195597 | down | -2.9561653 | down |
| CDK13              | NM_031267    | cyclin-dependent kinase 13                                                              | -2.9897325 | down | -2.6361322 | down |
| KY                 | NM_178554    | kyphoscoliosis peptidase                                                                | -3.153499  | down | -2.494125  | down |
| MMD2               | NM_198403    | monocyte to macrophage differentiation-associated 2                                     | -3.5563962 | down | -2.3638217 | down |

|              |              |                                                                              |                 |                 |
|--------------|--------------|------------------------------------------------------------------------------|-----------------|-----------------|
| RNASE7       | NM_032572    | ribonuclease, RNase A family, 7                                              | -3.441989 down  | -3.0744746 down |
| FAM83G       | NM_001039999 | family with sequence similarity 83, member G                                 | -3.7324202 down | -3.3051016 down |
| NR4A3        | NM_173200    | nuclear receptor subfamily 4, group A, member 3                              | -4.1451697 down | -2.4256346 down |
| SPACA4       | NM_133498    | sperm acrosome associated 4                                                  | -2.8797195 down | -2.8658245 down |
| FLJ16171     | NR_046113    | FLJ16171 protein                                                             | -4.456786 down  | -3.077039 down  |
| WDFY4        | NM_020945    | WDFY family member 4                                                         | -4.1682367 down | -6.073584 down  |
| NRXN1        | NM_004801    | neurexin 1                                                                   | -5.6087255 down | -6.327814 down  |
| MAS1L        | NM_052967    | MAS1 oncogene-like                                                           | -2.1188357 down | -2.6141255 down |
|              |              |                                                                              | -3.4498158 down | -2.8989537 down |
| C1orf94      | NM_032884    | chromosome 1 open reading frame 94                                           | -4.2618175 down | -3.756665 down  |
| EVC          | NM_153717    | Ellis van Creveld syndrome                                                   | -2.0444205 down | -2.7697384 down |
| PLA2G2F      | NM_022819    | phospholipase A2, group IIF                                                  | -4.5901465 down | -3.403952 down  |
| MAST4        | NM_198828    | microtubule associated serine/threonine kinase family member 4               | -2.270318 down  | -3.4127192 down |
| MGC10814     | BC004943     | uncharacterized protein MGC10814                                             | -2.8463356 down | -2.439593 down  |
| CHKA         | NM_001277    | choline kinase alpha                                                         | -2.8922307 down | -3.3115492 down |
|              |              |                                                                              | -2.3634236 down | -3.0070133 down |
| LOC729770    | XR_112442    | uncharacterized LOC729770                                                    | -4.0857825 down | -6.183721 down  |
|              |              |                                                                              | -4.771054 down  | -2.9896858 down |
|              | AK130290     |                                                                              | -2.223409 down  | -3.0822678 down |
| GDNF         | NM_000514    | glial cell derived neurotrophic factor                                       | -3.3872845 down | -2.1684034 down |
| DYNC111      | NM_004411    | dynein, cytoplasmic 1, intermediate chain 1                                  | -4.5076895 down | -3.1733766 down |
| POLQ         | NM_199420    | polymerase (DNA directed), theta                                             | -3.473344 down  | -3.7286987 down |
| ZDHHC14      | NM_153746    | zinc finger, DHHC-type containing 14                                         | -2.2533472 down | -2.8085394 down |
| HSD3B1       | NM_000862    | hydroxy-delta-5-steroid dehydrogenase, 3 beta- and steroid delta-isomerase 1 | -4.3433223 down | -2.3151848 down |
| TSPAN15      | NM_012339    | tetraspanin 15                                                               | -2.7452376 down | -3.7497544 down |
| GOLGA6L5P    |              | golgin A6 family-like 5, pseudogene                                          | -6.9764524 down | -3.574765 down  |
| LOC254099    | NR_038869    | uncharacterized LOC254099                                                    | -2.1583831 down | -2.1128137 down |
|              |              |                                                                              | -4.833741 down  | -3.0458848 down |
| LOC440570    | BC036435     | uncharacterized LOC440570                                                    | -3.3676214 down | -2.5759373 down |
| PTK2B        | AK128371     | protein tyrosine kinase 2 beta                                               | -3.2689044 down | -5.003921 down  |
|              |              |                                                                              | -3.6835198 down | -2.0228636 down |
| TMEM213      | NM_001085429 | transmembrane protein 213                                                    | -3.141155 down  | -2.7899535 down |
| ATP6VOA4     | NM_020632    | ATPase, H+ transporting, lysosomal V0 subunit a4                             | -3.362149 down  | -2.221564 down  |
| ZNF236       | AF085243     | zinc finger protein 236                                                      | -3.3924828 down | -3.1913104 down |
| LOC100128770 | NR_047572    | uncharacterized LOC100128770                                                 | -4.8236938 down | -2.5847692 down |
| PAQR3        | BC031256     | progesterone and adipoQ receptor family member III                           | -3.0193427 down | -4.154528 down  |
| AP3B2        | NM_004644    | adaptor-related protein complex 3, beta 2 subunit                            | -2.860026 down  | -3.4030423 down |
| PLA2G4F      | NM_213600    | phospholipase A2, group IVF                                                  | -3.1767044 down | -2.6701288 down |
| PAX3         | NM_013942    | paired box 3                                                                 | -2.1487 down    | -3.6595964 down |
| LOC100133306 | AK125136     | uncharacterized LOC100133306                                                 | -3.275926 down  | -2.4206388 down |
| LRRTM2       | NM_015564    | leucine rich repeat transmembrane neuronal 2                                 | -4.2407784 down | -2.1928859 down |
| GLOD5        | NM_001080489 | glyoxalase domain containing 5                                               | -2.820592 down  | -3.307993 down  |
| ENTPD3       | NM_001248    | ectonucleoside triphosphate diphosphohydrolase 3                             | -2.487411 down  | -3.190444 down  |
| HOXD10       | NM_002148    | homeobox D10                                                                 | -2.5739188 down | -2.7860587 down |
| GPR151       | NM_194251    | G protein-coupled receptor 151                                               | -2.025946 down  | -2.0616794 down |
| KRTAP7-1     | NM_181606    | keratin associated protein 7-1 (gene/pseudogene)                             | -4.4194274 down | -2.0595503 down |
| FHL2         | CR936682     | four and a half LIM domains 2                                                | -4.855638 down  | -3.5324337 down |
| PEG3-AS1     | NR_023847    | PEG3 antisense RNA 1                                                         | -5.20535 down   | -2.824169 down  |
| C7orf60      | NM_152556    | chromosome 7 open reading frame 60                                           | -2.0350688 down | -2.3955445 down |
| KRTAP9-4     | NM_033191    | keratin associated protein 9-4                                               | -3.8046248 down | -2.282601 down  |
| MS4A2        | NM_000139    | membrane-spanning 4-domains, subfamily A, member 2                           | -2.1466374 down | -2.3528442 down |
| OTOG         | XM_005252894 | otogelin                                                                     | -3.856835 down  | -2.0336635 down |
| MOGAT1       | NM_058165    | monoacylglycerol O-acyltransferase 1                                         | -3.0788498 down | -2.0775344 down |
| DCDC5        | NM_020869    | doublecortin domain containing 5                                             | -5.717283 down  | -2.1005309 down |
| SGSM1        | NM_001039948 | small G protein signaling modulator 1                                        | -4.089707 down  | -4.0712523 down |
| H1FOO        | NM_153833    | H1 histone family, member O, oocyte-specific                                 | -2.4701095 down | -2.195511 down  |
| HHIP1        | NM_001127258 | HHIP-like 1                                                                  | -4.3807864 down | -2.9411142 down |
| PRSS27       | NM_031948    | protease, serine 27                                                          | -2.9303668 down | -2.892147 down  |
| ADAD2        | NM_139174    | adenosine deaminase domain containing 2                                      | -3.2303932 down | -2.6538084 down |
| EGFLAM       | NM_152403    | EGF-like, fibronectin type III and laminin G domains                         | -2.069753 down  | -2.8712275 down |
| IL21         | NM_021803    | interleukin 21                                                               | -3.9880693 down | -2.505085 down  |
|              |              |                                                                              | -6.566463 down  | -3.3438714 down |

|               |              |                                                                       |                 |                 |
|---------------|--------------|-----------------------------------------------------------------------|-----------------|-----------------|
| C12orf77      | NM_001101339 | chromosome 12 open reading frame 77                                   | -3.431409 down  | -2.3369946 down |
| PRPF40B       | NM_001031698 | PRP40 pre-mRNA processing factor 40 homolog B (S. cerevisiae)         | -2.0940976 down | -2.1412349 down |
| KRTAP13-3     | NM_181622    | keratin associated protein 13-3                                       | -3.7251003 down | -2.4094756 down |
| SHANK2        | NM_012309    | SH3 and multiple ankyrin repeat domains 2                             | -2.6133018 down | -3.990878 down  |
| LOC100129840  | AK126633     | uncharacterized LOC100129840                                          | -2.0743992 down | -2.2003484 down |
| SAMM50        | AK124895     | SAMM50 sorting and assembly machinery component                       | -2.8685935 down | -2.794607 down  |
|               |              |                                                                       | -3.4017203 down | -4.5553555 down |
| GRIK1-AS1     | NR_027021    | GRIK1 antisense RNA 1                                                 | -4.528228 down  | -4.8278446 down |
| IGF1          | NM_000618    | insulin-like growth factor 1 (somatomedin C)                          | -4.2389855 down | -2.6714737 down |
| SMPDL3B       | NM_001009568 | sphingomyelin phosphodiesterase, acid-like 3B                         | -2.100032 down  | -2.5115447 down |
| DEFB115       | NM_001037730 | defensin, beta 115                                                    | -4.099375 down  | -2.3854241 down |
| MIR503HG      | NR_024607    | MIR503 host gene (non-protein coding)                                 | -4.262186 down  | -2.8313148 down |
|               |              |                                                                       | -2.6794598 down | -3.501977 down  |
| TAS2R13       | NM_023920    | taste receptor, type 2, member 13                                     | -2.197716 down  | -6.0611205 down |
| C9orf92       | NM_001271829 | chromosome 9 open reading frame 92                                    | -2.1804469 down | -2.2791998 down |
| C1QTNF1       | NM_198594    | C1q and tumor necrosis factor related protein 1                       | -3.4386747 down | -3.01527 down   |
| RNF212        | NM_001131034 | ring finger protein 212                                               | -3.345049 down  | -2.3526158 down |
| SOGA1         | NM_199181    | suppressor of glucose, autophagy associated 1                         | -2.5017445 down | -3.131229 down  |
| FAM134A       | NM_024293    | family with sequence similarity 134, member A                         | -2.3377404 down | -2.2635784 down |
|               |              |                                                                       | -2.5455604 down | -3.0650012 down |
| SOX21         | NM_007084    | SRX (sex determining region Y)-box 21                                 | -4.509207 down  | -3.1146472 down |
| OR4F29        | NM_001005221 | olfactory receptor, family 4, subfamily F, member 29                  | -5.0110016 down | -2.3857095 down |
| TREH          | NM_007180    | trehalase (brush-border membrane glycoprotein)                        | -2.1237082 down | -3.3082974 down |
| LOC440040     | NR_027044    | glutamate receptor, metabotropic 5 pseudogene                         | -4.0887885 down | -2.1251934 down |
| DMBX1         | NM_147192    | diencephalon/mesencephalon homeobox 1                                 | -2.1984198 down | -2.8457117 down |
| C20orf166-AS1 | AK054875     | C20orf166 antisense RNA 1                                             | -6.636039 down  | -3.8827298 down |
| CASR          | NM_001178065 | calcium-sensing receptor                                              | -3.831848 down  | -2.2855563 down |
| EGFR          | NM_201282    | epidermal growth factor receptor                                      | -2.252608 down  | -3.1577954 down |
| LOC653712     | NR_034179    | intraflagellar transport 122 homolog (Chlamydomonas) pseudogene       | -3.9754863 down | -4.171725 down  |
| AGBL1         | NM_152336    | ATP/GTP binding protein-like 1                                        | -2.53444 down   | -2.045469 down  |
|               | XR_244723    |                                                                       | -5.293987 down  | -2.8013902 down |
| DEFB123       | NM_153324    | defensin, beta 123                                                    | -2.2521536 down | -2.784746 down  |
| FN1           | NM_054034    | fibronectin 1                                                         | -4.186497 down  | -2.2919369 down |
| CTSL3P        | NR_027917    | cathepsin L family member 3, pseudogene                               | -3.8634944 down | -3.0742848 down |
| LOC100128079  | XR_243370    | uncharacterized LOC100128079                                          | -2.8896449 down | -3.0410738 down |
|               |              |                                                                       | -4.901936 down  | -2.6380951 down |
|               |              |                                                                       | -2.478083 down  | -3.6973255 down |
| BACE1         | NM_012104    | beta-site APP-cleaving enzyme 1                                       | -3.6266146 down | -4.215377 down  |
| KCNIP2        | NM_173197    | Kv channel interacting protein 2                                      | -3.4221997 down | -2.0455768 down |
| TBC1D24       | NM_020705    | TBC1 domain family, member 24                                         | -3.6651707 down | -2.0904098 down |
| PCA3          | NR_015342    | prostate cancer antigen 3 (non-protein coding)                        | -7.6312537 down | -3.2699623 down |
| PLA2G4D       | NM_178034    | phospholipase A2, group IVD (cytosolic)                               | -4.1246085 down | -2.7543018 down |
|               |              |                                                                       | -4.4280047 down | -4.814678 down  |
| GJC3          | NM_181538    | gap junction protein, gamma 3, 30.2kDa                                | -4.5795345 down | -7.2663884 down |
|               |              |                                                                       | -2.112227 down  | -2.6411629 down |
| WFDC5         | NM_145652    | WAP four-disulfide core domain 5                                      | -4.577946 down  | -5.2364945 down |
| LRRC14B       | NM_001080478 | leucine rich repeat containing 14B                                    | -5.5541577 down | -4.1470437 down |
| LOC388849     | NM_001243537 | uncharacterized LOC388849                                             | -3.8001928 down | -2.9330778 down |
|               |              |                                                                       | -4.2258434 down | -3.5745382 down |
| BAD           | AK309150     | BCL2-associated agonist of cell death                                 | -2.9449153 down | -2.5891025 down |
|               |              |                                                                       | -2.0221806 down | -3.2103443 down |
| SPRR2C        | NR_003062    | small proline-rich protein 2C (pseudogene)                            | -4.56502 down   | -5.268663 down  |
|               | BC029043     |                                                                       | -4.4780912 down | -2.434501 down  |
| LOC646652     | XR_241774    | integral membrane glycoprotein-like                                   | -2.987425 down  | -4.879596 down  |
| LOC100128320  | AK125438     | uncharacterized LOC100128320                                          | -5.8658676 down | -5.204045 down  |
| MCCD1         | NM_001011700 | mitochondrial coiled-coil domain 1                                    | -2.3733726 down | -2.6316607 down |
| SLC22A12      | NM_144585    | solute carrier family 22 (organic anion/urate transporter), member 12 | -3.0122786 down | -2.382098 down  |
| GPRC6A        | NM_148963    | G protein-coupled receptor, family C, group 6, member                 | -3.2741032 down | -2.0084155 down |
| LOC257152     | AK001439     | uncharacterized LOC257152                                             | -3.951049 down  | -4.5231023 down |
| LOC644083     | XR_112044    | uncharacterized LOC644083                                             | -3.2993798 down | -2.031323 down  |
| KIF18B        | NM_001265577 | kinesin family member 18B                                             | -4.905325 down  | -2.4329178 down |

|              |              |                                                                                           |            |      |            |      |
|--------------|--------------|-------------------------------------------------------------------------------------------|------------|------|------------|------|
|              | AK127601     |                                                                                           | -8.0969925 | down | -7.013296  | down |
| FAM182B      | NR_027061    | family with sequence similarity 182, member B                                             | -7.0808654 | down | -4.446895  | down |
|              |              |                                                                                           | -2.0131373 | down | -2.805535  | down |
| LOC645427    | AK094407     | uncharacterized LOC645427                                                                 | -5.1247487 | down | -2.940977  | down |
| LOC646034    | AK125175     | uncharacterized LOC646034                                                                 | -2.9871988 | down | -2.8623116 | down |
| SLC22A6      | NM_153277    | solute carrier family 22 (organic anion transporter), member 6                            | -2.112785  | down | -3.6926575 | down |
| OR2L3        | NM_001004687 | olfactory receptor, family 2, subfamily L, member 3                                       | -2.5190835 | down | -3.0904346 | down |
| LOC284379    |              | solute carrier family 7 (cationic amino acid transporter, y+ system), member 3 pseudogene | -3.352311  | down | -2.5896008 | down |
| LOC728093    | XR_133401    | putative POM121-like protein 1-like                                                       | -2.4229887 | down | -3.1270144 | down |
| LOC339240    | NR_001443    | keratin 17 pseudogene                                                                     | -3.3057435 | down | -2.251825  | down |
| DNM1         | AB209124     | dynamitin 1                                                                               | -4.179987  | down | -5.9209957 | down |
| OR1K1        | NM_080859    | olfactory receptor, family 1, subfamily K, member 1                                       | -2.5619006 | down | -2.29827   | down |
| TMEM239      | NM_001167670 | transmembrane protein 239                                                                 | -3.2283669 | down | -2.354593  | down |
| LOC646743    | NR_033930    | uncharacterized LOC646743                                                                 | -7.533138  | down | -6.9335494 | down |
| TNNT2        | NM_000364    | troponin T type 2 (cardiac)                                                               | -6.3595967 | down | -3.6965022 | down |
| KLK15        | NM_017509    | kallikrein-related peptidase 15                                                           | -4.519163  | down | -2.576642  | down |
| C9orf152     | NM_001012993 | chromosome 9 open reading frame 152                                                       | -3.7276387 | down | -2.067756  | down |
| SCGB1D2      | NM_006551    | secretoglobin, family 1D, member 2                                                        | -2.8465605 | down | -2.367468  | down |
| PRKG2        | NM_006259    | protein kinase, cGMP-dependent, type II                                                   | -3.4355297 | down | -2.108568  | down |
| ANKRD20A12P  | NR_046228    | ankyrin repeat domain 20 family, member A12, pseudogene                                   | -4.8926783 | down | -6.3074183 | down |
| BBIP1        | AK125829     | BBSome interacting protein 1                                                              | -3.6637754 | down | -2.659356  | down |
|              |              |                                                                                           | -3.9294705 | down | -4.5740514 | down |
|              |              |                                                                                           | -3.3030953 | down | -4.9121447 | down |
| FLJ30403     | NR_034159    | uncharacterized LOC729975                                                                 | -2.3147686 | down | -5.3173976 | down |
| PRR20B       | NM_001130404 | proline rich 20B                                                                          | -3.0119767 | down | -2.647472  | down |
|              | AI218952     |                                                                                           | -4.497109  | down | -3.341208  | down |
|              |              |                                                                                           | -2.5083578 | down | -2.7077096 | down |
|              |              |                                                                                           | -2.198738  | down | -2.3534725 | down |
| MUC13        | NM_033049    | mucin 13, cell surface associated                                                         | -13.06234  | down | -6.926307  | down |
| TTYT14       | NR_001543    | testis-specific transcript, Y-linked 14 (non-protein coding)                              | -3.7363346 | down | -2.7651021 | down |
| NT5E         | NM_002526    | 5'-nucleotidase, ecto (CD73)                                                              | -3.0897279 | down | -2.1316285 | down |
| C2orf66      | NM_213608    | chromosome 2 open reading frame 66                                                        | -3.142606  | down | -2.7817643 | down |
| RFPL4AL1     | NM_001277397 | ret finger protein-like 4A-like 1                                                         | -3.8857641 | down | -2.625456  | down |
| GUCA1A       | AK125780     | guanylate cyclase activator 1A (retina)                                                   | -2.5478992 | down | -2.2565725 | down |
| CELA3A       | AK308514     | chymotrypsin-like elastase family, member 3A                                              | -3.7255614 | down | -5.3999424 | down |
|              | XM_005253817 |                                                                                           | -3.7453048 | down | -3.0245314 | down |
| DKK3         | NM_015881    | dickkopf WNT signaling pathway inhibitor 3                                                | -3.3695397 | down | -5.5479383 | down |
| MYL3         | NM_000258    | myosin, light chain 3, alkali; ventricular, skeletal, slow                                | -5.2481933 | down | -3.9522247 | down |
| LOC101928125 |              | major seminal plasma glycoprotein PSP-I-like                                              | -3.309607  | down | -3.6487744 | down |
| SLC8A2       | NM_015063    | solute carrier family 8 (sodium/calcium exchanger), member 2                              | -3.363458  | down | -3.599214  | down |
|              |              |                                                                                           | -4.144339  | down | -2.4550724 | down |
|              |              |                                                                                           | -2.9484534 | down | -2.266612  | down |
| ASTL         | NM_001002036 | astacin-like metallo-endopeptidase (M12 family)                                           | -4.6552873 | down | -5.6348124 | down |
| FAM47A       | NM_203408    | family with sequence similarity 47, member A                                              | -2.3044775 | down | -2.873728  | down |
| OR2T1        | NM_030904    | olfactory receptor, family 2, subfamily T, member 1                                       | -4.5176363 | down | -2.457143  | down |
| KCNJ13       | NM_002242    | potassium inwardly-rectifying channel, subfamily J, member 13                             | -6.919588  | down | -3.466033  | down |
| LINC00544    |              | long intergenic non-protein coding RNA 544                                                | -5.5293097 | down | -3.2540586 | down |
|              | AK123300     |                                                                                           | -2.1097949 | down | -2.0487065 | down |
| LAMA4        | NM_001105206 | laminin, alpha 4                                                                          | -6.2213125 | down | -5.1228747 | down |
| BCL2L15      | NM_001010922 | BCL2-like 15                                                                              | -4.6121244 | down | -3.1335475 | down |
| SIGLEC17P    | NR_047529    | sialic acid binding Ig-like lectin 17, pseudogene                                         | -3.6782072 | down | -5.5102215 | down |
| DOC2B        | NM_003585    | double C2-like domains, beta                                                              | -2.4733732 | down | -2.101427  | down |
| VKORC1       | AK125618     | vitamin K epoxide reductase complex, subunit 1                                            | -2.8217468 | down | -3.1096578 | down |
|              |              |                                                                                           | -5.2779803 | down | -5.4172783 | down |
| LOC100652824 | NM_001277372 | uncharacterized protein KIAA2012                                                          | -3.4607103 | down | -2.028815  | down |
| ACSM5        |              | acyl-CoA synthetase medium-chain family member 5                                          | -5.2238708 | down | -3.1996808 | down |
| LINC00893    | NR_027455    | long intergenic non-protein coding RNA 893                                                | -4.117779  | down | -3.4121733 | down |
|              |              |                                                                                           | -2.243266  | down | -4.2110543 | down |
|              |              |                                                                                           | -2.0180762 | down | -3.2585142 | down |

|              |              |                                                                                   |                 |                 |
|--------------|--------------|-----------------------------------------------------------------------------------|-----------------|-----------------|
|              |              |                                                                                   | -3.647513 down  | -2.1952505 down |
| SLC9A5       | NM_004594    | solute carrier family 9, subfamily A (NHE5, cation proton antiporter 5), member 5 | -3.5455575 down | -2.5307686 down |
|              |              |                                                                                   | -2.1661193 down | -3.3831615 down |
| SPANXA1      | NM_013453    | sperm protein associated with the nucleus, X-linked, family member A1             | -5.5813317 down | -3.1174965 down |
| MYH15        | NM_014981    | myosin, heavy chain 15                                                            | -3.7967823 down | -2.0230348 down |
| ATP4B        | NM_000705    | ATPase, H+/K+ exchanging, beta polypeptide                                        | -2.11136 down   | -3.2286546 down |
|              |              |                                                                                   | -8.568361 down  | -5.982001 down  |
| C9orf96      | NM_153710    | chromosome 9 open reading frame 96                                                | -2.8538926 down | -2.5803359 down |
| FHAD1        | NM_052929    | forkhead-associated (FHA) phosphopeptide binding domain 1                         | -2.3698392 down | -2.1333544 down |
| ZNRD1-AS1    | NR_026751    | ZNRD1 antisense RNA 1                                                             | -3.3367116 down | -5.032544 down  |
|              |              |                                                                                   | -2.6221402 down | -3.5694723 down |
| BMP10        | NM_014482    | bone morphogenetic protein 10                                                     | -2.3684022 down | -2.414793 down  |
| PPAN-P2RY11  | NM_001040664 | PPAN-P2RY11 readthrough                                                           | -2.059526 down  | -4.0220838 down |
| SPRY4        | NM_030964    | sprouty homolog 4 (Drosophila)                                                    | -3.192514 down  | -2.0099323 down |
| HAPLN1       | NM_001884    | hyaluronan and proteoglycan link protein 1                                        | -3.4948018 down | -2.2465894 down |
|              |              |                                                                                   | -3.942514 down  | -2.542598 down  |
| LYPD6        | NM_001195685 | LY6/PLAUR domain containing 6                                                     | -5.629027 down  | -3.7093213 down |
|              |              |                                                                                   | -4.394614 down  | -2.8566647 down |
| CST1         | NM_001898    | cystatin SN                                                                       | -2.9084961 down | -2.5339808 down |
| SYNGAP1      | NM_006772    | synaptic Ras GTPase activating protein 1                                          | -3.5952303 down | -2.971704 down  |
| LOC647983    | AK126828     | uncharacterized LOC647983                                                         | -2.9117491 down | -4.001189 down  |
| SMPX         | NM_014332    | small muscle protein, X-linked                                                    | -4.408218 down  | -2.355111 down  |
| TMEM191B     | NM_001242313 | transmembrane protein 191B                                                        | -3.9663272 down | -2.428717 down  |
| TRIM31       | NM_007028    | tripartite motif containing 31                                                    | -4.3925486 down | -2.069862 down  |
|              | BC066548     |                                                                                   | -3.7657835 down | -2.1639297 down |
| GCM2         | NM_004752    | glial cells missing homolog 2 (Drosophila)                                        | -8.538396 down  | -4.5928836 down |
| SPDYE3       | NM_001004351 | speedy/RINGO cell cycle regulator family member E3                                | -9.048894 down  | -5.2403007 down |
| C17orf47     | NM_001038704 | chromosome 17 open reading frame 47                                               | -5.22768 down   | -4.134124 down  |
| C20orf112    | NM_001256798 | chromosome 20 open reading frame 112                                              | -4.7333417 down | -3.826094 down  |
| OLIG3        | NM_175747    | oligodendrocyte transcription factor 3                                            | -4.4394217 down | -3.3683784 down |
| CELF5        | NM_021938    | CUGBP, Elav-like family member 5                                                  | -2.000706 down  | -2.1728947 down |
| LOC100131831 | AK129685     | uncharacterized LOC100131831                                                      | -3.3401163 down | -2.1375268 down |
|              |              |                                                                                   | -3.3350067 down | -7.518144 down  |
| OR2M5        | NM_001004690 | olfactory receptor, family 2, subfamily M, member 5                               | -6.7175207 down | -5.429307 down  |
| FGF18        | NM_003862    | fibroblast growth factor 18                                                       | -3.16828 down   | -2.57209 down   |
| HOXB5        | NM_002147    | homeobox B5                                                                       | -3.5866268 down | -3.2419593 down |
| LOC731656    | NR_027454    | uncharacterized LOC731656                                                         | -3.5993297 down | -2.717006 down  |
| MS4A15       | NM_001098835 | membrane-spanning 4-domains, subfamily A, member 15                               | -5.9790115 down | -2.134461 down  |
| CNTN2        | NM_005076    | contactin 2 (axonal)                                                              | -2.3980975 down | -4.524108 down  |
| GPR133       | NM_198827    | G protein-coupled receptor 133                                                    | -2.1164494 down | -3.0372365 down |
| SLC7A14      | NM_020949    | solute carrier family 7, member 14                                                | -4.6224732 down | -2.4758465 down |
|              | CU687439     |                                                                                   | -2.6724308 down | -2.1815228 down |
| COL4A1       | NM_001845    | collagen, type IV, alpha 1                                                        | -5.886313 down  | -4.864076 down  |
|              |              |                                                                                   | -3.6251414 down | -2.1866405 down |
| ZC3H10       | NM_032786    | zinc finger CCCH-type containing 10                                               | -2.0510392 down | -2.6616583 down |
| TGFB2        | NM_003238    | transforming growth factor, beta 2                                                | -3.055837 down  | -2.0163758 down |
| LOC644662    |              | uncharacterized LOC644662                                                         | -4.680299 down  | -2.0723808 down |
| C3orf20      | NM_032137    | chromosome 3 open reading frame 20                                                | -4.7395577 down | -3.0207899 down |
| SVOP1        | NM_174959    | SVOP-like                                                                         | -4.290916 down  | -2.2200868 down |
| PSMB7        |              | proteasome (prosome, macropain) subunit, beta type, 7                             | -2.6602936 down | -2.0117671 down |
|              | AF001893     |                                                                                   | -4.0939503 down | -2.8376615 down |
|              | XR_109656    |                                                                                   | -5.778005 down  | -3.221395 down  |
| AHNAK2       | NM_138420    | AHNAK nucleoprotein 2                                                             | -4.3639317 down | -3.2539978 down |
| SELV         | NM_182704    | selenoprotein V                                                                   | -5.2477098 down | -3.2637463 down |
| GYG2         | NM_001184703 | glycogenin 2                                                                      | -2.709407 down  | -2.4951386 down |
| C11orf95     | NM_001144936 | chromosome 11 open reading frame 95                                               | -2.1004827 down | -2.8758984 down |
| SSX4B        | NM_001034832 | synovial sarcoma, X breakpoint 4B                                                 | -9.031811 down  | -5.78702 down   |
| TDRD3        | BC020604     | tudor domain containing 3                                                         | -5.1527405 down | -3.1269019 down |
| TOX2         | NM_032883    | TOX high mobility group box family member 2                                       | -3.155693 down  | -2.1438344 down |
|              | XM_005254829 |                                                                                   | -3.8228116 down | -2.3832526 down |

|              |              |                                                               |                 |                 |
|--------------|--------------|---------------------------------------------------------------|-----------------|-----------------|
| MGC20647     | BC008289     | uncharacterized protein MGC20647                              | -3.8994372 down | -3.140553 down  |
|              |              |                                                               | -2.648222 down  | -2.009179 down  |
|              |              |                                                               | -3.6317687 down | -3.9271653 down |
| MIXL1        | NM_001282402 | Mix paired-like homeobox                                      | -3.0936568 down | -2.4086452 down |
| CES3         | NM_024922    | carboxylesterase 3                                            | -3.923915 down  | -3.7508008 down |
| CDRT15P2     | CF272591     | CMT1A duplicated region transcript 15 pseudogene 2            | -8.116303 down  | -5.4234653 down |
| CXorf38      | AL832829     | chromosome X open reading frame 38                            | -6.3632436 down | -2.774094 down  |
| TSPAN8       | NM_004616    | tetraspanin 8                                                 | -3.9676056 down | -2.351582 down  |
| LOC100289650 | NR_036584    | uncharacterized LOC100289650                                  | -5.4919457 down | -5.134286 down  |
| HULC         | NR_004855    | hepatocellular carcinoma up-regulated long non-coding RNA     | -3.245721 down  | -2.8277068 down |
| CP           | NM_000096    | ceruloplasmin (ferroxidase)                                   | -3.8290896 down | -2.0804539 down |
| TTC28-AS1    | NR_026963    | TTC28 antisense RNA 1                                         | -4.7788754 down | -5.1564555 down |
|              |              |                                                               | -4.681456 down  | -3.246623 down  |
| MYO5B        | NM_001080467 | myosin VB                                                     | -2.1622176 down | -2.735534 down  |
|              |              |                                                               | -6.7268376 down | -4.5198603 down |
| GORAB        | NM_001146039 | golgin, RAB6-interacting                                      | -4.460955 down  | -2.1386724 down |
| CHIAP2       |              | chitinase, acidic pseudogene 2                                | -2.6081417 down | -2.6871252 down |
| LOC100129223 | XR_111243    | uncharacterized LOC100129223                                  | -4.7283764 down | -3.0323548 down |
|              | BC064144     |                                                               | -3.631553 down  | -2.941225 down  |
| TRIM51       | NM_032681    | tripartite motif-containing 51                                | -6.7421284 down | -3.7017303 down |
| PRSS54       | NM_001080492 | protease, serine, 54                                          | -2.3186297 down | -2.1586802 down |
|              |              |                                                               | -3.4967318 down | -3.143149 down  |
| TMEM44       | NM_001011655 | transmembrane protein 44                                      | -4.202736 down  | -2.4158256 down |
|              |              |                                                               | -2.485159 down  | -2.0613482 down |
|              |              |                                                               | -8.800126 down  | -8.081863 down  |
| SGK494       | NM_001174103 | uncharacterized serine/threonine-protein kinase SgK494        | -3.9401453 down | -4.712771 down  |
| UGT1A6       | NM_001072    | UDP glucuronosyltransferase 1 family, polypeptide A6          | -3.616997 down  | -2.7758641 down |
| LOC100130453 | AK123920     | uncharacterized LOC100130453                                  | -2.8773363 down | -3.266371 down  |
| RUFY4        | NM_198483    | RUN and FYVE domain containing 4                              | -3.350211 down  | -4.517506 down  |
| ARHGAP35     | NM_004491    | Rho GTPase activating protein 35                              | -2.086419 down  | -2.017066 down  |
| DEFT1P       | NR_036686    | defensin, theta 1 pseudogene                                  | -5.412975 down  | -2.2326682 down |
| TCGF1        | NM_173209    | TGFB-induced factor homeobox 1                                | -4.559707 down  | -6.2166343 down |
| GADC144A     | NM_014695    | coiled-coil domain containing 144A                            | -3.904522 down  | -2.1359017 down |
| FLJ37786     |              | uncharacterized LOC642691                                     | -2.5663917 down | -2.85832 down   |
| FTCD         | NM_206965    | formimidoyltransferase cyclodeaminase                         | -4.1456485 down | -2.718331 down  |
| ADAT2        | NM_001286259 | adenosine deaminase, tRNA-specific 2                          | -2.19801 down   | -2.2314584 down |
| TMEM25       | NM_032780    | transmembrane protein 25                                      | -2.3513644 down | -2.5767536 down |
|              |              |                                                               | -4.0503774 down | -4.5056696 down |
|              |              |                                                               | -3.075554 down  | -2.5572865 down |
| GSTM5        | NM_000851    | glutathione S-transferase mu 5                                | -2.0333214 down | -2.880986 down  |
|              | XR_110857    |                                                               | -6.3977985 down | -4.881606 down  |
| CCDC11       | NM_145020    | coiled-coil domain containing 11                              | -3.2385538 down | -2.6664994 down |
| SPACA5       | NM_205856    | sperm acrosome associated 5                                   | -2.7097774 down | -3.5503838 down |
| PTPRG        | NM_002841    | protein tyrosine phosphatase, receptor type, G                | -2.5296814 down | -2.7297883 down |
| LOC100131894 | AK092825     | uncharacterized LOC100131894                                  | -3.493357 down  | -3.298152 down  |
| HTR4         | NM_001040173 | 5-hydroxytryptamine (serotonin) receptor 4, G protein-coupled | -4.4692106 down | -2.7669418 down |
|              |              |                                                               | -3.1720343 down | -2.4836795 down |
| ZNF763       | NM_001012753 | zinc finger protein 763                                       | -2.7272363 down | -2.4495506 down |
|              |              |                                                               | -2.4312892 down | -2.4366586 down |
| LINC00222    | NR_033376    | long intergenic non-protein coding RNA 222                    | -3.6635182 down | -2.7653391 down |
| HIBCH        | NM_198047    | 3-hydroxyisobutyryl-CoA hydrolase                             | -3.251146 down  | -2.5109205 down |
| TMEM262      | AK124141     | transmembrane protein 262                                     | -2.954637 down  | -2.9576893 down |
| KIAA1244     | NM_020340    | KIAA1244                                                      | -4.133689 down  | -2.0615048 down |
| LINC00263    |              | long intergenic non-protein coding RNA 263                    | -2.277511 down  | -2.3385224 down |
|              |              |                                                               | -2.7621043 down | -2.3800116 down |
| LOC101928356 | XM_005260632 | uncharacterized LOC101928356                                  | -2.8883715 down | -2.077758 down  |
| ACTA2-AS1    | XR_110433    | ACTA2 antisense RNA 1                                         | -4.297376 down  | -3.4432583 down |
| ADAM21       | NM_003813    | ADAM metallopeptidase domain 21                               | -2.22801 down   | -2.1352837 down |
| SHISA9       | NM_001145205 | shisa family member 9                                         | -3.1103396 down | -2.3256302 down |
| NR1D2        | XM_005265639 | nuclear receptor subfamily 1, group D, member 2               | -4.5979977 down | -2.9418225 down |
| ZNF551       | AK126625     | zinc finger protein 551                                       | -3.694569 down  | -4.3313055 down |
| CHRNA5       | NM_000745    | cholinergic receptor, nicotinic, alpha 5 (neuronal)           | -3.5252004 down | -3.8311088 down |

|              |              |                                                                        |                 |                 |
|--------------|--------------|------------------------------------------------------------------------|-----------------|-----------------|
| GOLGA6A      | NM_001038640 | golgin A6 family, member A                                             | -5.2765617 down | -4.515959 down  |
| KRTAP4-1     | NM_033060    | keratin associated protein 4-1                                         | -5.6619554 down | -7.800764 down  |
| SLFN5        | NM_144975    | schlafen family member 5                                               | -2.9985046 down | -2.7624593 down |
| XLOC_014512  |              |                                                                        | -2.7244267 down | -2.930762 down  |
| NKAIN4       | NM_152864    | Na+/K+ transporting ATPase interacting 4                               | -2.932312 down  | -2.099535 down  |
| SLC3A1       | DQ023513     | solute carrier family 3 (amino acid transporter heavy chain), member 1 | -3.5304673 down | -2.5089746 down |
| PRRC2B       | NM_013318    | proline-rich coiled-coil 2B                                            | -2.2755969 down | -3.4010828 down |
| LOC646719    |              | uncharacterized LOC646719                                              | -2.586085 down  | -2.1726642 down |
| CCDC104      | XM_005264120 | coiled-coil domain containing 104                                      | -4.388496 down  | -4.960236 down  |
| NUPL2        |              | nucleoporin like 2                                                     | -4.1397505 down | -2.258889 down  |
| IFNW1        | NM_002177    | interferon, omega 1                                                    | -3.816654 down  | -2.479682 down  |
| DEDD         | XM_005245598 | death effector domain containing                                       | -3.7361922 down | -3.5773826 down |
| ZNF662       | NM_207404    | zinc finger protein 662                                                | -2.2450626 down | -3.2179415 down |
| C1orf227     | NM_001024601 | chromosome 1 open reading frame 227                                    | -3.972156 down  | -2.218295 down  |
| C21orf88     | NR_026542    | chromosome 21 open reading frame 88                                    | -2.5638278 down | -2.2156951 down |
|              |              |                                                                        | -2.8380506 down | -2.4456036 down |
| RPRML        | NM_203400    | reprimo-like                                                           | -3.238193 down  | -2.5461533 down |
| PLA2G4F      | NM_213600    | phospholipase A2, group IVF                                            | -2.3714466 down | -3.569584 down  |
| TAS2R41      | NM_176883    | taste receptor, type 2, member 41                                      | -2.146868 down  | -2.5078769 down |
| CACNA2D1     | NM_000722    | calcium channel, voltage-dependent, alpha 2/delta subunit 1            | -2.2712677 down | -2.2805147 down |
| H2AFB2       | NM_001017991 | H2A histone family, member B2                                          | -2.6558301 down | -3.7219415 down |
| MC3R         | NM_019888    | melanocortin 3 receptor                                                | -2.5054488 down | -2.5158591 down |
| CSPG4P8      | NR_033579    | chondroitin sulfate proteoglycan 4 pseudogene 8                        | -2.6950886 down | -2.8473406 down |
| LBP          | NM_004139    | lipopolysaccharide binding protein                                     | -2.8356764 down | -2.1001062 down |
| CYP1A2       | NM_000761    | cytochrome P450, family 1, subfamily A, polypeptide 2                  | -3.0114543 down | -2.5994556 down |
| LOC286272    | AK093004     | uncharacterized LOC286272                                              | -2.0728724 down | -2.0242498 down |
|              |              |                                                                        | -2.900329 down  | -3.5111523 down |
| SPRED3       | NR_073032    | sprouty-related, EVH1 domain containing 3                              | -5.852899 down  | -3.9820526 down |
|              | BC130558     |                                                                        | -2.3949933 down | -2.5987318 down |
| TARM1        | NM_001135686 | T cell-interacting, activating receptor on myeloid cells 1             | -3.3468943 down | -2.3951137 down |
| RAI1         | AJ271790     | retinoic acid induced 1                                                | -2.5672915 down | -2.4362583 down |
| VCX2         | NM_016378    | variable charge, X-linked 2                                            | -7.5590267 down | -4.6333914 down |
|              |              |                                                                        | -4.5514884 down | -3.5649886 down |
| FLG          | NM_002016    | filaggrin                                                              | -2.2354674 down | -3.173141 down  |
| SLC17A6      | NM_020346    | solute carrier family 17 (vesicular glutamate transporter), member 6   | -4.472577 down  | -6.0544634 down |
| LACRT        | NM_033277    | lacritin                                                               | -3.4390855 down | -2.9059248 down |
| LOC100126784 | NR_015384    | uncharacterized LOC100126784                                           | -2.4430256 down | -3.4552524 down |
| TRIP13       | NM_001166260 | thyroid hormone receptor interactor 13                                 | -2.0666785 down | -2.2269318 down |
| LOC100127909 | AK130422     | uncharacterized LOC100127909                                           | -3.7166522 down | -3.1288 down    |
| DUSP8        | NM_004420    | dual specificity phosphatase 8                                         | -4.888023 down  | -2.5769916 down |
| LOC400548    |              | uncharacterized LOC400548                                              | -2.3815918 down | -2.40036 down   |
|              |              |                                                                        | -2.557638 down  | -4.2483263 down |
| CSNK1A1P1    | NR_027320    | casein kinase 1, alpha 1 pseudogene 1                                  | -2.293013 down  | -2.1933153 down |
| OR2L8        | NM_001001963 | olfactory receptor, family 2, subfamily L, member 8                    | -2.740557 down  | -2.1067717 down |
| KRTAP1-5     | NM_031957    | keratin associated protein 1-5                                         | -2.711638 down  | -2.1074543 down |
| TMEM132A     | NM_017870    | transmembrane protein 132A                                             | -2.877574 down  | -2.3369367 down |
| LOC100131860 | AK097109     | uncharacterized LOC100131860                                           | -3.108029 down  | -2.086315 down  |
| SPRR2F       | NM_001014450 | small proline-rich protein 2F                                          | -2.3785138 down | -2.3916743 down |
| SLC3A1       | NM_000341    | solute carrier family 3 (amino acid transporter heavy chain), member 1 | -13.755996 down | -9.613231 down  |
| BEST3        | NM_001282614 | bestrophin 3                                                           | -2.1513548 down | -3.3493996 down |
| TMEM35       | NM_021637    | transmembrane protein 35                                               | -8.613536 down  | -4.691395 down  |
| OPN1MW       | NM_000513    | opsin 1 (cone pigments), medium-wave-sensitive                         | -4.2184377 down | -3.7852883 down |
| KLK2         | NM_001002231 | kallikrein-related peptidase 2                                         | -3.3831027 down | -3.8603814 down |
| NCKAP5L      | BC110599     | NCK-associated protein 5-like                                          | -3.9752944 down | -3.3476906 down |
| CAV1         | NM_001753    | caveolin 1, caveolae protein, 22kDa                                    | -3.3506534 down | -2.6581335 down |
| LOC285095    | XM_005275940 | uncharacterized LOC285095                                              | -3.403231 down  | -2.771608 down  |
| IQCH         | NM_001031715 | IQ motif containing H                                                  | -3.459624 down  | -2.1537576 down |
| FMO2         | NM_001460    | flavin containing monooxygenase 2 (non-functional)                     | -3.2999504 down | -2.3110301 down |
| CRYGN        | NM_144727    | crystallin, gamma N                                                    | -2.5662577 down | -2.383322 down  |
| TBX2         | NM_005994    | T-box 2                                                                | -5.112472 down  | -2.4387703 down |

|              |              |                                                        |                 |                 |
|--------------|--------------|--------------------------------------------------------|-----------------|-----------------|
| ALDOAP2      | M21191       | aldolase A, fructose-bisphosphate pseudogene 2         | -3.914163 down  | -2.0807843 down |
|              |              |                                                        | -2.0556438 down | -2.3149915 down |
| NRAP         | NM_198060    | nebulin-related anchoring protein                      | -4.2681665 down | -2.4597619 down |
| C6orf132     | NM_001164446 | chromosome 6 open reading frame 132                    | -7.083013 down  | -9.727346 down  |
| DNAH12       | NM_178504    | dynein, axonemal, heavy chain 12                       | -2.7406645 down | -2.3318284 down |
| ABCG8        | NM_022437    | ATP-binding cassette, sub-family G (WHITE), member     | -8.683227 down  | -4.009081 down  |
|              | XR_245014    |                                                        | -3.322607 down  | -3.3536286 down |
| ANKRD20A9P   | NR_027995    | ankyrin repeat domain 20 family, member A9, pseudogene | -4.0775495 down | -2.7862835 down |
| MRO          | NM_031939    | maestro                                                | -3.7212763 down | -2.1969876 down |
| RHBDD1       | XM_005246899 | rhomboid domain containing 1                           | -4.405751 down  | -4.3730392 down |
|              |              |                                                        | -7.0380025 down | -10.683768 down |
| FAM25A       | NM_001146157 | family with sequence similarity 25, member A           | -4.29874 down   | -5.3189464 down |
| DPYSL5       | NM_020134    | dihydropyrimidinase-like 5                             | -6.0256314 down | -3.9440286 down |
| LOC100509091 | XM_003403877 | extracellular matrix protein 2-like                    | -4.0398355 down | -2.1500516 down |
| SPACA5       | NM_205856    | sperm acrosome associated 5                            | -3.7635021 down | -2.5995908 down |
| LOC644285    | AK126853     | uncharacterized LOC644285                              | -2.5874307 down | -2.3458006 down |
| LDHAL6A      | NM_144972    | lactate dehydrogenase A-like 6A                        | -3.1628232 down | -2.3466198 down |
| LOC100131000 | AK124361     | uncharacterized LOC100131000                           | -2.672186 down  | -3.218077 down  |
| DHH          | NM_021044    | desert hedgehog                                        | -4.5250783 down | -2.851316 down  |
| FLJ12825     | NR_026655    | uncharacterized LOC440101                              | -2.9325914 down | -2.1450946 down |
| ZAR1         | NM_175619    | zygote arrest 1                                        | -2.529602 down  | -4.3487625 down |
| Unknown      |              |                                                        | -2.681653 down  | -2.0454698 down |
| KRT6B        | NM_005555    | keratin 6B                                             | -2.886168 down  | -2.2352533 down |
| PRSS55       | NM_198464    | protease, serine, 55                                   | -2.013933 down  | -3.3137004 down |
| SEC14L6      |              | SEC14-like 6 (S. cerevisiae)                           | -6.6565104 down | -3.011952 down  |
| LOC728061    | AK025151     | hCG2003663                                             | -2.101864 down  | -2.5644073 down |
| FAM198A      | AK091001     | family with sequence similarity 198, member A          | -4.235054 down  | -3.992717 down  |
| LOC100130849 |              | phosphorylase kinase, gamma 1 (muscle) pseudogene      | -3.8368144 down | -3.8647861 down |
| Unknown      |              |                                                        | -4.50916 down   | -4.554587 down  |
|              | AK096324     |                                                        | -3.5536737 down | -2.1652827 down |
| OR14A16      | NM_001001966 | olfactory receptor, family 14, subfamily A, member 16  | -4.8684325 down | -2.6017656 down |
| Unknown      |              |                                                        | -2.7589223 down | -2.4328039 down |
| FLJ46906     | NR_033896    | uncharacterized LOC441172                              | -2.6454606 down | -2.533102 down  |
| C20orf78     | CR738909     | chromosome 20 open reading frame 78                    | -2.5147624 down | -2.1220982 down |
|              | DB066855     |                                                        | -5.3450966 down | -5.1644583 down |
| INMT         | NM_001199219 | indolethylamine N-methyltransferase                    | -2.7871006 down | -2.257948 down  |
| PKDCC        | AK311155     | protein kinase domain containing, cytoplasmic          | -8.488906 down  | -2.9054477 down |
| TAS2R19      | NM_176888    | taste receptor, type 2, member 19                      | -4.191179 down  | -2.273835 down  |
| Unknown      |              |                                                        | -2.8093636 down | -3.831292 down  |
| ZNF81        | NM_007137    | zinc finger protein 81                                 | -5.50009 down   | -3.3331683 down |
| Unknown      |              |                                                        | -2.9515224 down | -2.6774642 down |
| XLOC_004729  |              |                                                        | -4.5539103 down | -5.732493 down  |
|              | XR_252542    |                                                        | -3.7279403 down | -4.7672544 down |
| Unknown      |              |                                                        | -2.1732457 down | -2.010095 down  |
| RAB43        | BM917410     | RAB43, member RAS oncogene family                      | -4.005407 down  | -4.0891805 down |
| Unknown      |              |                                                        | -3.6262307 down | -9.106207 down  |
| ABI3BP       | NM_015429    | ABI family, member 3 (NESH) binding protein            | -4.010035 down  | -2.7335498 down |
|              | AK127417     |                                                        | -2.2932725 down | -2.0540762 down |
| Unknown      |              |                                                        | -2.2990296 down | -2.3209527 down |
| LINC00917    |              | long intergenic non-protein coding RNA 917             | -3.3895245 down | -3.1207476 down |
| FLJ11710     | AK021772     | uncharacterized protein FLJ11710                       | -4.07118 down   | -3.912566 down  |
| LOC100129098 | XM_001714893 | WAS/WASL-interacting protein family member 1-like      | -4.818137 down  | -2.7728262 down |
| CPXM2        | NM_198148    | carboxypeptidase X (M14 family), member 2              | -2.9014094 down | -3.7511039 down |
| CCDC103      | NM_001258397 | coiled-coil domain containing 103                      | -2.0293207 down | -2.7786374 down |
| INO80        | NM_017553    | INO80 complex subunit                                  | -2.0089707 down | -2.2209868 down |
| AQP7P3       |              | aquaporin 7 pseudogene 3                               | -2.9169405 down | -2.6258645 down |
| PRRT2        | NM_145239    | proline-rich transmembrane protein 2                   | -2.8965902 down | -2.5783308 down |
| LCNL1        | NM_207510    | lipocalin-like 1                                       | -2.3413348 down | -3.0202014 down |
| PRAMEF7      | NM_001012277 | PRAME family member 7                                  | -4.934108 down  | -2.3781807 down |
| CNTNAP4      | NM_138994    | contactin associated protein-like 4                    | -5.6010222 down | -2.8021007 down |
| OR5T3        | NM_001004747 | olfactory receptor, family 5, subfamily T, member 3    | -4.4067535 down | -2.5306466 down |
| Unknown      |              |                                                        | -2.2567105 down | -2.3137233 down |



|              |                     |                                                                               |                 |                 |
|--------------|---------------------|-------------------------------------------------------------------------------|-----------------|-----------------|
| OR2H2        | NM_007160           | olfactory receptor, family 2, subfamily H, member 2                           | -2.355751 down  | -3.0151265 down |
| SOD3         | NM_003102           | superoxide dismutase 3, extracellular                                         | -4.3885098 down | -2.8318462 down |
| MFS6L        | NM_152599           | major facilitator superfamily domain containing 6-like                        | -7.2669406 down | -3.7301908 down |
|              | XR_242003           |                                                                               | -2.6000671 down | -2.7394753 down |
|              | AK090928            |                                                                               | -2.3281045 down | -2.9178474 down |
|              | XR_111551           |                                                                               | -6.3857136 down | -6.3807073 down |
| Unknown      |                     |                                                                               | -2.4589067 down | -2.7157795 down |
| SLC5A4       | NM_014227           | solute carrier family 5 (glucose activated ion channel), member 4             | -3.3165627 down | -2.34644 down   |
|              | XR_247160           |                                                                               | -3.223451 down  | -2.5894132 down |
| CREB3L4      | NM_130898           | cAMP responsive element binding protein 3-like 4                              | -3.1609852 down | -2.0981402 down |
| PTPRG        | NM_002841           | protein tyrosine phosphatase, receptor type, G                                | -2.362611 down  | -2.2563598 down |
|              | XM_005276096        |                                                                               | -2.4808502 down | -3.227337 down  |
| TEX19        | NM_207459           | testis expressed 19                                                           | -4.444819 down  | -2.0959647 down |
| SOX13        | BC040649            | SRY (sex determining region Y)-box 13                                         | -2.7995327 down | -2.0764039 down |
| SPC24        | NM_182513           | SPC24, NDC80 kinetochore complex component                                    | -3.5928822 down | -2.0852225 down |
| LINC00114    | AY204748            | long intergenic non-protein coding RNA 114                                    | -5.0722156 down | -2.791678 down  |
| RARB         | BC069735            | retinoic acid receptor, beta                                                  | -5.4694147 down | -3.9027586 down |
| PSG5         | BG354573            | pregnancy specific beta-1-glycoprotein 5                                      | -5.4630227 down | -3.4516673 down |
| Unknown      |                     |                                                                               | -5.184938 down  | -2.7488794 down |
| FAM86B3P     |                     | family with sequence similarity 86, member A pseudogene                       | -2.1150413 down | -3.0564413 down |
| Unknown      |                     |                                                                               | -11.828863 down | -6.469771 down  |
| Unknown      |                     |                                                                               | -4.2464 down    | -5.801462 down  |
| TMCO4        | NM_181719           | transmembrane and coiled-coil domains 4                                       | -2.593795 down  | -2.375089 down  |
| LOC100129917 | NR_036511           | uncharacterized LOC100129917                                                  | -5.6742225 down | -2.1845236 down |
| IL20RA       | AK098312            | interleukin 20 receptor, alpha                                                | -2.7197917 down | -2.0692644 down |
| S100A5       | NM_002962           | S100 calcium binding protein A5                                               | -4.0946097 down | -3.9728982 down |
| GLIS3        | DQ438879            | GLIS family zinc finger 3                                                     | -4.8215327 down | -3.84525 down   |
| LOC100131581 | AK092544            | uncharacterized LOC100131581                                                  | -4.264229 down  | -6.2694902 down |
| NEK2         | NM_002497           | NIMA-related kinase 2                                                         | -5.203363 down  | -2.6656015 down |
| GPM6B        | NM_001001996        | glycoprotein M6B                                                              | -2.152969 down  | -3.0386808 down |
|              | AF289562            |                                                                               | -2.324719 down  | -2.5417893 down |
| ZNF316       |                     | zinc finger protein 316                                                       | -2.2313414 down | -2.1793094 down |
| Unknown      |                     |                                                                               | -3.3035352 down | -2.4414911 down |
| PTGER3       | NM_198715           | prostaglandin E receptor 3 (subtype EP3)                                      | -2.3494437 down | -2.3230703 down |
|              | XR_112958           |                                                                               | -7.2895436 down | -3.5592332 down |
| Unknown      |                     |                                                                               | -10.18425 down  | -4.4264274 down |
| CPNE9        | NM_153635           | copine family member IX                                                       | -3.292837 down  | -2.8515382 down |
| DCLK1        | NM_004734           | doublecortin-like kinase 1                                                    | -4.5513983 down | -4.0360823 down |
| WFIKKN2      | NM_175575           | WAP, follistatin/kazal, immunoglobulin, kunitz and netrin domain containing 2 | -6.0906954 down | -2.9805276 down |
| MUC3         | AF007191            | intestinal mucin-like                                                         | -2.6964486 down | -2.2538464 down |
| DNM3         | NM_001278252        | dynamins 3                                                                    | -3.4509933 down | -2.1572034 down |
| WNK4         | NM_032387           | WNK lysine deficient protein kinase 4                                         | -2.8895853 down | -2.4359827 down |
| FAM189A2     | NM_004816           | family with sequence similarity 189, member A2                                | -2.698642 down  | -2.1782188 down |
| KRBOX1       | NM_001205272        | KRAB box domain containing 1                                                  | -2.6187804 down | -2.0611854 down |
|              | 08-sep NM_001098811 | septin 8                                                                      | -2.5213604 down | -2.7487297 down |
| Unknown      |                     |                                                                               | -3.9527194 down | -3.4421222 down |
| LOC285740    | NR_027114           | uncharacterized LOC285740                                                     | -7.3191624 down | -3.6962438 down |
| BMP3         | NM_001201           | bone morphogenetic protein 3                                                  | -4.0776105 down | -4.1398873 down |
| SZT2         | BC051343            | seizure threshold 2 homolog (mouse)                                           | -3.7157001 down | -2.9513226 down |
|              | AK125954            |                                                                               | -2.4387221 down | -3.079703 down  |
| FAM138E      | NR_026819           | family with sequence similarity 138, member E                                 | -2.3055542 down | -2.0997684 down |
| L3MBTL4      | NM_173464           | l(3)mbt-like 4 (Drosophila)                                                   | -3.7521877 down | -2.481974 down  |
| Unknown      |                     |                                                                               | -4.3694143 down | -3.3554232 down |
| TBCB         |                     | tubulin folding cofactor B                                                    | -2.3452904 down | -2.6268542 down |
| MAGEC3       | NM_138702           | melanoma antigen family C, 3                                                  | -5.0959487 down | -3.0491858 down |
| FRAS1        | AK092082            | Fraser syndrome 1                                                             | -3.6836667 down | -2.0997248 down |
| FBXO27       | NM_178820           | F-box protein 27                                                              | -3.9830894 down | -3.283798 down  |
| GPR101       | NM_054021           | G protein-coupled receptor 101                                                | -3.0422552 down | -2.0174198 down |
| LOC100131581 | AK092544            | uncharacterized LOC100131581                                                  | -3.0183983 down | -4.8780975 down |
