# Supplementary material for: Transcriptional signature associated with early rheumatoid arthritis and healthy individuals at high risk to develop the disease
Source: PubMed Central journal article supplement (PMC5870959; doi:10.1371/journal.pone.0194205), 2018-03-27
Supplement: pone.0194205.s008.pdf [file pone.0194205.s008.pdf]

**Supplementary table 8.** Down regulated genes in AR and up regulated genes in ACCP+ groups according Venn diagram

| Gene Symbol  | Genbank Accession | Gene Name                                                                          | ACCP+       |            | RA          |            |
|--------------|-------------------|------------------------------------------------------------------------------------|-------------|------------|-------------|------------|
|              |                   |                                                                                    | Fold Change | Regulation | Fold Change | Regulation |
| SCARF2       | NM_153334         | scavenger receptor class F, member 2                                               | 2.360706    | up         | -2.2257302  | down       |
| LOC389834    | NR_027420         | ankyrin repeat domain 57 pseudogene                                                | 2.7860982   | up         | -2.426158   | down       |
| DDX3Y        | NM_001122665      | DEAD (Asp-Glu-Ala-Asp) box helicase 3, Y-linked                                    | 2.0400486   | up         | -2.8573813  | down       |
| ACTN4        | NM_004924         | actinin, alpha 4                                                                   | 2.3923786   | up         | -2.0808754  | down       |
| USP21        | NM_001014443      | ubiquitin specific peptidase 21                                                    | 2.651004    | up         | -2.2606707  | down       |
| HMGA2        | NM_003484         | high mobility group AT-hook 2                                                      | 3.1459346   | up         | -2.9009023  | down       |
| TMEM151B     | NM_001137560      | transmembrane protein 151B                                                         | 2.4972787   | up         | -2.982902   | down       |
| LOC100130238 | NR_024563         | uncharacterized LOC100130238                                                       | 2.1249104   | up         | -2.4025908  | down       |
| ZNF205       | NM_003456         | zinc finger protein 205                                                            | 3.350588    | up         | -3.5070689  | down       |
| CLPTM1       | NM_001294         | cleft lip and palate associated transmembrane protein 1                            | 2.178986    | up         | -2.5246377  | down       |
| KCTD19       | NM_001100915      | potassium channel tetramerization domain containing 19                             | 3.0291438   | up         | -2.0930295  | down       |
| COL6A2       | NM_058174         | collagen, type VI, alpha 2                                                         | 2.97253     | up         | -2.2731335  | down       |
| NPB          | NM_148896         | neuropeptide B                                                                     | 2.888444    | up         | -2.6334124  | down       |
| LOC729732    | XR_159504         | uncharacterized LOC729732                                                          | 2.6223218   | up         | -2.2632632  | down       |
| PCSK1N       | NM_013271         | proprotein convertase subtilisin/kexin type 1 inhibitor                            | 3.5376828   | up         | -4.017537   | down       |
| ZNF771       | NM_016643         | zinc finger protein 771                                                            | 2.0332878   | up         | -2.7068307  | down       |
| SPRY1        | NM_001258038      | sprouty homolog 1, antagonist of FGF signaling (Drosophila)                        | 2.126156    | up         | -3.9324708  | down       |
| PFKL         | NM_002626         | phosphofructokinase, liver                                                         | 3.2058015   | up         | -4.5982337  | down       |
| CHI3L1       | NM_001276         | chitinase 3-like 1 (cartilage glycoprotein-39)                                     | 2.4524612   | up         | -2.1526206  | down       |
| SPSB4        | NM_080862         | splA/ryanodine receptor domain and SOCS box containing 4                           | 2.1544807   | up         | -2.0252662  | down       |
| BHLHE23      | NM_080606         | basic helix-loop-helix family, member e23                                          | 2.8559263   | up         | -2.953399   | down       |
| SUSD4        |                   | sushi domain containing 4                                                          | 2.3678844   | up         | -2.1846018  | down       |
| LOC100130557 | NR_024567         | uncharacterized LOC100130557                                                       | 2.0982842   | up         | -2.0409     | down       |
| TPGS1        | NM_033513         | tubulin polyglutamylase complex subunit 1                                          | 2.06661     | up         | -2.420084   | down       |
|              | S60780            |                                                                                    | 2.1208236   | up         | -2.0055678  | down       |
| A4GALT       | NM_017436         | alpha 1,4-galactosyltransferase                                                    | 2.2207155   | up         | -4.01797    | down       |
| ZNF329       | XR_243958         | zinc finger protein 329                                                            | 2.294157    | up         | -2.483955   | down       |
| PYY2         |                   | peptide YY, 2 (pseudogene)                                                         | 2.2559474   | up         | -2.9844809  | down       |
| USP21        | NM_001014443      | ubiquitin specific peptidase 21                                                    | 2.0056686   | up         | -2.4280882  | down       |
| CMIP         | NM_198390         | c-Maf inducing protein                                                             | 2.1697936   | up         | -2.3066244  | down       |
| SLC11A1      | NM_000578         | solute carrier family 11 (proton-coupled divalent metal ion transporter), member 1 | 2.160759    | up         | -2.4163134  | down       |
| KCNQ2        | NM_172109         | potassium voltage-gated channel, KQT-like subfamily, member 2                      | 2.3352866   | up         | -2.9891136  | down       |
