# Supplementary material for: Transcriptional signature associated with early rheumatoid arthritis and healthy individuals at high risk to develop the disease
Source: PubMed Central journal article supplement (PMC5870959; doi:10.1371/journal.pone.0194205), 2018-03-27
Supplement: pone.0194205.s009.pdf [file pone.0194205.s009.pdf]

**Supplementary table 9.** Up regulated genes in AR and down regulated genes in ACCP+ groups according Venn diagram

| Gene Symbol  | Genbank Accession | Gene Name                                                                        | ACCP+       |            | RA          |            |
|--------------|-------------------|----------------------------------------------------------------------------------|-------------|------------|-------------|------------|
|              |                   |                                                                                  | Fold Change | Regulation | Fold Change | Regulation |
| CCDC175      |                   | coiled-coil domain containing 175                                                | -2.5091715  | down       | 2.0528383   | up         |
| ETV4         | NM_001079675      | ets variant 4                                                                    | -2.0932825  | down       | 2.078938    | up         |
| LOC100131138 | NR_036513         | uncharacterized LOC100131138                                                     | -2.0074818  | down       | 2.896989    | up         |
| PBX1         | NM_002585         | pre-B-cell leukemia homeobox 1                                                   | -2.457484   | down       | 2.5033636   | up         |
| KCNK17       | NM_031460         | potassium channel, subfamily K, member 17                                        | -2.125552   | down       | 2.0954254   | up         |
|              | XR_248979         |                                                                                  | -2.9701798  | down       | 2.2098558   | up         |
| ERBB3        | NM_001982         | v-erb-b2 avian erythroblastic leukemia viral oncogene homolog 3                  | -2.0647767  | down       | 2.1594281   | up         |
| ANP32E       | NM_030920         | acidic (leucine-rich) nuclear phosphoprotein 32 family, member E                 | -2.1112173  | down       | 2.136219    | up         |
| PPCS         |                   | phosphopantothencycysteine synthetase                                            | -2.3279622  | down       | 2.4874487   | up         |
| TAS2R50      | NM_176890         | taste receptor, type 2, member 50                                                | -2.0667639  | down       | 2.1007218   | up         |
| DIXDC1       | NM_001037954      | DIX domain containing 1                                                          | -2.3925838  | down       | 2.7631285   | up         |
|              | XR_109175         |                                                                                  | -3.8947074  | down       | 2.015282    | up         |
| GEMIN2       | NM_003616         | gem (nuclear organelle) associated protein 2                                     | -2.5096903  | down       | 2.307731    | up         |
| Unknown      |                   |                                                                                  | -2.619015   | down       | 2.6360404   | up         |
| NPPA         | NM_006172         | natriuretic peptide A                                                            | -2.1464565  | down       | 2.326938    | up         |
| LRTM1        | NM_020678         | leucine-rich repeats and transmembrane domains 1                                 | -2.4161856  | down       | 2.12895     | up         |
| TAF1         | NM_001286074      | TAF1 RNA polymerase II, TATA box binding protein (TBP)-associated factor, 250kDa | -2.0174625  | down       | 2.2413568   | up         |
| Unknown      |                   |                                                                                  | -2.630963   | down       | 2.2269216   | up         |
| PCDH9        | BC150296          | protocadherin 9                                                                  | -3.0894706  | down       | 2.9098659   | up         |
| ERV18-1      | AK126787          | endogenous retrovirus group 18, member 1                                         | -2.1419477  | down       | 2.1447368   | up         |
| RCAN2        | NM_005822         | regulator of calcineurin 2                                                       | -2.2815917  | down       | 2.8625188   | up         |
| KCND3        | NM_004980         | potassium voltage-gated channel, Shal-related subfamily, member 3                | -2.090463   | down       | 2.0554535   | up         |
| TPD52L3      | NM_001001874      | tumor protein D52-like 3                                                         | -2.4482148  | down       | 3.119155    | up         |
| IGFL2        | NM_001002915      | IGF-like family member 2                                                         | -2.614197   | down       | 2.4721038   | up         |
| ARGLU1       | XR_243043         | arginine and glutamate rich 1                                                    | -2.4347777  | down       | 2.158685    | up         |
| TFPI         | NM_006287         | tissue factor pathway inhibitor (lipoprotein-associated coagulation inhibitor)   | -2.2367547  | down       | 2.8298364   | up         |
| Unknown      |                   |                                                                                  | -2.1864674  | down       | 2.0243075   | up         |
| Unknown      |                   |                                                                                  | -2.4927843  | down       | 2.062969    | up         |
| TRPA1        | NM_007332         | transient receptor potential cation channel, subfamily A, member 1               | -2.0856848  | down       | 2.3513865   | up         |
| CCL11        | NM_002986         | chemokine (C-C motif) ligand 11                                                  | -2.5958261  | down       | 2.0526867   | up         |
| XG           | NM_175569         | Xg blood group                                                                   | -2.021248   | down       | 2.3177845   | up         |
| Unknown      |                   |                                                                                  | -2.5485678  | down       | 2.5991683   | up         |
| COL4A2-AS2   | XR_158875         | COL4A2 antisense RNA 2                                                           | -3.0004354  | down       | 2.1227462   | up         |
| GJA10        | NM_032602         | gap junction protein, alpha 10, 62kDa                                            | -2.3321197  | down       | 2.4125774   | up         |
| NCS1         | NM_014286         | neuronal calcium sensor 1                                                        | -2.7745311  | down       | 2.0359647   | up         |
| CDADC1       | NM_030911         | cytidine and dCMP deaminase domain containing 1                                  | -3.2822497  | down       | 2.978757    | up         |
| FABP4        | NM_001442         | fatty acid binding protein 4, adipocyte                                          | -2.3255286  | down       | 2.1605802   | up         |
