# Supplementary material for: Transcriptional signature associated with early rheumatoid arthritis and healthy individuals at high risk to develop the disease
Source: PubMed Central journal article supplement (PMC5870959; doi:10.1371/journal.pone.0194205), 2018-03-27
Supplement: pone.0194205.s010.pdf [file pone.0194205.s010.pdf]

**Supplementary table 10. Biological function of the 2 fold change Up-regulated genes according GO analysis in relatives with ACCP+**

| Biological function        | Gene Symbol                                                                        | Gene Name                                                                                     | Genebank Accession |
|----------------------------|------------------------------------------------------------------------------------|-----------------------------------------------------------------------------------------------|--------------------|
| Innate immune response     | CORO1A                                                                             | coronin, actin binding protein, 1A                                                            | NM_007074          |
|                            | APOBEC3C                                                                           | apolipoprotein B mRNA editing enzyme, catalytic polypeptide-like 3C                           | NM_014508          |
|                            | LGALS3                                                                             | lectin, galactoside-binding, soluble, 3                                                       | NM_002306          |
|                            | NRROS                                                                              | negative regulator of reactive oxygen species                                                 | NM_198565          |
|                            | DUSP4                                                                              | dual specificity phosphatase 4                                                                | NM_001394          |
|                            | GAPDH                                                                              | glyceraldehyde-3-phosphate dehydrogenase                                                      | NM_002046          |
|                            | FCER1G                                                                             | Fc fragment of IgE, high affinity I, receptor for: gamma polypeptide                          | NM_004106          |
|                            | MAPKAPK2                                                                           | mitogen-activated protein kinase-activated protein kinase 2                                   | NM_004759          |
|                            | OAS2                                                                               | 2'-5'-oligoadenylate synthetase 2, 69/71kDa                                                   | NM_016817          |
|                            | HSP90B1                                                                            | heat shock protein 90kDa beta (Grp94), member 1                                               | NM_003299          |
|                            | NLRC5                                                                              | NLR family, CARD domain containing 5                                                          | NM_032206          |
|                            | MYD88                                                                              | myeloid differentiation primary response 88                                                   | NM_002468          |
|                            | CACTIN                                                                             | cactin, spliceosome C complex subunit                                                         | NM_021231          |
|                            | CXCL16                                                                             | chemokine (C-X-C motif) ligand 16                                                             | NM_022059          |
|                            | ITGB2                                                                              | integrin, beta 2 (complement component 3 receptor 3 and 4 subunit)                            | L78790             |
|                            | CAMK2G                                                                             | calcium/calmodulin-dependent protein kinase II gamma                                          | NM_172171          |
|                            | OAS1                                                                               | 2'-5'-oligoadenylate synthetase 1, 40/46kDa                                                   | NM_002534          |
|                            | UBE2L6                                                                             | ubiquitin-conjugating enzyme E2L 6                                                            | NM_198183          |
|                            | IFITM3                                                                             | interferon induced transmembrane protein 3                                                    | NM_021034          |
|                            | PHLPP1                                                                             | PH domain and leucine rich repeat protein phosphatase 1                                       | NM_194449          |
|                            | UNC93B1                                                                            | unc-93 homolog B1 (C. elegans)                                                                | NM_030930          |
|                            | CD4                                                                                | CD4 molecule                                                                                  | NM_000616          |
|                            | IRF7                                                                               | interferon regulatory factor 7                                                                | NM_004031          |
|                            | WASF2                                                                              | WAS protein family, member 2                                                                  | AK075231           |
|                            | AIF1                                                                               | allograft inflammatory factor 1                                                               | NM_004847          |
|                            | SLC11A1                                                                            | solute carrier family 11 (proton-coupled divalent metal ion transporter), member 1            | NM_000578          |
|                            | POLR1C                                                                             | polymerase (RNA) I polypeptide C, 30kDa                                                       | CA416988           |
| CSF1                       | colony stimulating factor 1 (macrophage)                                           | NM_172212                                                                                     |                    |
| PDPK1                      | 3-phosphoinositide dependent protein kinase 1                                      | AF111845                                                                                      |                    |
| IFNAR2                     | interferon (alpha, beta and omega) receptor 2                                      | NM_000874                                                                                     |                    |
| HLA-DRB3                   | major histocompatibility complex, class II, DR beta 3                              | NM_022555                                                                                     |                    |
| UNC93B1                    | unc-93 homolog B1 (C. elegans)                                                     | NM_030930                                                                                     |                    |
| SAMHD1                     | SAM domain and HD domain 1                                                         | NM_015474                                                                                     |                    |
| Interferon type 1 response | OAS2                                                                               | 2'-5'-oligoadenylate synthetase 2, 69/71kDa                                                   | NM_016817          |
|                            | OAS1                                                                               | 2'-5'-oligoadenylate synthetase 1, 40/46kDa                                                   | NM_002534          |
|                            | IFITM3                                                                             | interferon induced transmembrane protein 3                                                    | NM_021034          |
|                            | IRF7                                                                               | interferon regulatory factor 7                                                                | NM_004031          |
|                            | IFNAR2                                                                             | interferon (alpha, beta and omega) receptor 2                                                 | NM_000874          |
| Interferon gamma response  | GAPDH                                                                              | glyceraldehyde-3-phosphate dehydrogenase                                                      | NM_002046          |
|                            | OAS2                                                                               | 2'-5'-oligoadenylate synthetase 2, 69/71kDa                                                   | NM_016817          |
|                            | CXCL16                                                                             | chemokine (C-X-C motif) ligand 16                                                             | NM_022059          |
|                            | CAMK2G                                                                             | calcium/calmodulin-dependent protein kinase II gamma                                          | NM_172171          |
|                            | OAS1                                                                               | 2'-5'-oligoadenylate synthetase 1, 40/46kDa                                                   | NM_002534          |
|                            | IFITM3                                                                             | interferon induced transmembrane protein 3                                                    | NM_021034          |
|                            | IRF7                                                                               | interferon regulatory factor 7                                                                | NM_004031          |
|                            | AIF1                                                                               | allograft inflammatory factor 1                                                               | NM_004847          |
| SLC11A1                    | solute carrier family 11 (proton-coupled divalent metal ion transporter), member 1 | NM_000578                                                                                     |                    |
| HLA-DRB3                   | major histocompatibility complex, class II, DR beta 3                              | NM_022555                                                                                     |                    |
| Leucocyte activation       | FCER1G                                                                             | Fc fragment of IgE, high affinity I, receptor for: gamma polypeptide                          | NM_004106          |
|                            | ITGAL                                                                              | integrin, alpha L (antigen CD11A (p180), lymphocyte function-associated antigen 1; alpha poly | NM_002209          |
|                            | CCND3                                                                              | cyclin D3                                                                                     | NM_001760          |
|                            | CD3E                                                                               | CD3e molecule, epsilon (CD3-TCR complex)                                                      | NM_000733          |
|                            | HDAC5                                                                              | histone deacetylase 5                                                                         | NM_001015053       |
|                            | CD4                                                                                | CD4 molecule                                                                                  | NM_000616          |
|                            | NKX2-3                                                                             | NK2 homeobox 3                                                                                | NM_145285          |
|                            | AIF1                                                                               | allograft inflammatory factor 1                                                               | NM_004847          |

|                                          |                                                                |                                                                                               |              |
|------------------------------------------|----------------------------------------------------------------|-----------------------------------------------------------------------------------------------|--------------|
|                                          | LYL1                                                           | lymphoblastic leukemia associated hematopoiesis regulator 1                                   | NM_005583    |
|                                          | SELPLG                                                         | selectin P ligand                                                                             | NM_001206609 |
|                                          | TNFRSF4                                                        | tumor necrosis factor receptor superfamily, member 4                                          | NM_003327    |
|                                          | CPLX2                                                          | complexin 2                                                                                   |              |
|                                          | ZBTB32                                                         | zinc finger and BTB domain containing 32                                                      | NM_014383    |
|                                          | SLC11A1                                                        | solute carrier family 11 (proton-coupled divalent metal ion transporter), member 1            | NM_000578    |
|                                          | CSF1                                                           | colony stimulating factor 1 (macrophage)                                                      | NM_172212    |
|                                          | Unknown                                                        | Homo sapiens cDNA FLJ39779 fis, clone SPLEN2001945. [AK097098]                                | AK097098     |
|                                          | FKBP1A                                                         | FK506 binding protein 1A, 12kDa                                                               | NM_000801    |
| Leucocyte migration                      | CORO1A                                                         | coronin, actin binding protein, 1A                                                            | NM_007074    |
|                                          | CAV1                                                           | caveolin 1, caveolae protein, 22kDa                                                           | NM_001753    |
|                                          | C5AR1                                                          | complement component 5a receptor 1                                                            | NM_001736    |
|                                          | FCER1G                                                         | Fc fragment of IgE, high affinity I, receptor for; gamma polypeptide                          | NM_004106    |
|                                          | ITGAL                                                          | integrin, alpha L (antigen CD11A (p180), lymphocyte function-associated antigen 1; alpha poly | NM_002209    |
|                                          | CXCL16                                                         | chemokine (C-X-C motif) ligand 16                                                             | NM_022059    |
|                                          | ITGB2                                                          | integrin, beta 2 (complement component 3 receptor 3 and 4 subunit)                            | L78790       |
|                                          | MYO9B                                                          | myosin IXB                                                                                    | NM_004145    |
|                                          | SLC7A5                                                         | solute carrier family 7 (amino acid transporter light chain, L system), member 5              | NM_003486    |
|                                          | NKX2-3                                                         | NK2 homeobox 3                                                                                | NM_145285    |
| SELPLG                                   | selectin P ligand                                              | NM_001206609                                                                                  |              |
| RET                                      | ret proto-oncogene                                             | NM_020630                                                                                     |              |
| Myeloid lineage differentiation          | MFAP2                                                          | microfibrillar-associated protein 2                                                           | NM_017459    |
|                                          | RASGRP4                                                        | RAS guanyl releasing protein 4                                                                | NM_170604    |
|                                          | MAEA                                                           | macrophage erythroblast attacher                                                              | NM_001017405 |
|                                          | NBEAL2                                                         | neurobeachin-like 2                                                                           | NM_015175    |
|                                          | JUNB                                                           | jun B proto-oncogene                                                                          | NM_002229    |
|                                          | GATA1                                                          | GATA binding protein 1 (globin transcription factor 1)                                        | NM_002049    |
|                                          | NKX2-3                                                         | NK2 homeobox 3                                                                                | NM_145285    |
|                                          | ERCC2                                                          | excision repair cross-complementation group 2                                                 | NM_000400    |
|                                          | WASF2                                                          | WAS protein family, member 2                                                                  | AK075231     |
|                                          | CSF1                                                           | colony stimulating factor 1 (macrophage)                                                      | NM_172212    |
| OCSTAMP                                  | osteoclast stimulatory transmembrane protein                   | NM_080721                                                                                     |              |
| HBZ                                      | hemoglobin, zeta                                               | NM_005332                                                                                     |              |
| Leucocyte differentiation                | CD3E                                                           | CD3e molecule, epsilon (CD3-TCR complex)                                                      | NM_000733    |
|                                          | HDAC5                                                          | histone deacetylase 5                                                                         | NM_001015053 |
|                                          | JUNB                                                           | jun B proto-oncogene                                                                          | NM_002229    |
|                                          | CD4                                                            | CD4 molecule                                                                                  | NM_000616    |
|                                          | GATA1                                                          | GATA binding protein 1 (globin transcription factor 1)                                        | NM_002049    |
|                                          | NKX2-3                                                         | NK2 homeobox 3                                                                                | NM_145285    |
|                                          | LYL1                                                           | lymphoblastic leukemia associated hematopoiesis regulator 1                                   | NM_005583    |
|                                          | CSF1                                                           | colony stimulating factor 1 (macrophage)                                                      | NM_172212    |
| Unknown                                  | Homo sapiens cDNA FLJ39779 fis, clone SPLEN2001945. [AK097098] | AK097098                                                                                      |              |
| OCSTAMP                                  | osteoclast stimulatory transmembrane protein                   | NM_080721                                                                                     |              |
| 1e-containing compound catabolic process | MOV10L1                                                        | Mov10 RISC complex RNA helicase like 1                                                        | NM_018995    |
|                                          | GNB1                                                           | guanine nucleotide binding protein (G protein), beta polypeptide 1                            | NM_002074    |
|                                          | ASNA1                                                          | arsA arsenite transporter, ATP-binding, homolog 1 (bacterial)                                 | NM_004317    |
|                                          | RNF213                                                         | ring finger protein 213                                                                       | NM_001256071 |
|                                          | TAPBP                                                          | TAP binding protein (tapasin)                                                                 | NM_003190    |
|                                          | ATP6V0D1                                                       | ATPase, H+ transporting, lysosomal 38kDa, V0 subunit d1                                       | NM_004691    |
|                                          | TUBA3D                                                         | tubulin, alpha 3d                                                                             | NM_080386    |
|                                          | NOA1                                                           | nitric oxide associated 1                                                                     | NM_032313    |
|                                          | MYH14                                                          | myosin, heavy chain 14, non-muscle                                                            | NM_001077186 |
|                                          | SRPR                                                           | signal recognition particle receptor (docking protein)                                        | NM_003139    |
|                                          | TUFM                                                           | Tu translation elongation factor, mitochondrial                                               | NM_003321    |
|                                          | MYO9B                                                          | myosin IXB                                                                                    | NM_004145    |
|                                          | ERCC2                                                          | excision repair cross-complementation group 2                                                 | NM_000400    |
|                                          | GNG8                                                           | guanine nucleotide binding protein (G protein), gamma 8                                       | NM_033258    |
|                                          | MRAS                                                           | muscle RAS oncogene homolog                                                                   | NM_012219    |
|                                          | PSMC4                                                          | proteasome (prosome, macropain) 26S subunit, ATPase, 4                                        | NM_006503    |

|                                               |                                                       |                                                                                                                                            |              |
|-----------------------------------------------|-------------------------------------------------------|--------------------------------------------------------------------------------------------------------------------------------------------|--------------|
| Purified                                      | DDX3Y                                                 | DEAD (Asp-Glu-Ala-Asp) box helicase 3, Y-linked                                                                                            | NM_004660    |
|                                               | GPX1                                                  | glutathione peroxidase 1                                                                                                                   | NM_201397    |
|                                               | ARFRP1                                                | ADP-ribosylation factor related protein 1                                                                                                  |              |
|                                               | ATP1A3                                                | ATPase, Na <sup>+</sup> /K <sup>+</sup> transporting, alpha 3 polypeptide                                                                  | NM_001256214 |
|                                               | CHD1L                                                 | chromodomain helicase DNA binding protein 1-like                                                                                           | NM_004284    |
|                                               | RHOG                                                  | ras homolog family member G                                                                                                                | NM_001665    |
|                                               | NKIRAS2                                               | NFKB inhibitor interacting Ras-like 2                                                                                                      | NM_001144927 |
| PDE4A                                         | phosphodiesterase 4A, cAMP-specific                   | NM_001111307                                                                                                                               |              |
| Cellular response to cytokines stimulus       | CORO1A                                                | coronin, actin binding protein, 1A                                                                                                         | NM_007074    |
|                                               | ACSL1                                                 | acyl-CoA synthetase long-chain family member 1                                                                                             | NM_001995    |
|                                               | CHI3L1                                                | chitinase 3-like 1 (cartilage glycoprotein-39)                                                                                             | NM_001276    |
|                                               | GAPDH                                                 | glyceraldehyde-3-phosphate dehydrogenase                                                                                                   | NM_002046    |
|                                               | IL2RG                                                 | interleukin 2 receptor, gamma                                                                                                              | NM_000206    |
|                                               | OAS2                                                  | 2'-5'-oligoadenylate synthetase 2, 69/71kDa                                                                                                | NM_016817    |
|                                               | EIF4G1                                                | eukaryotic translation initiation factor 4 gamma, 1                                                                                        | NM_182917    |
|                                               | RPS6KA4                                               | ribosomal protein S6 kinase, 90kDa, polypeptide 4                                                                                          | NM_003942    |
|                                               | CACTIN                                                | cactin, spliceosome C complex subunit                                                                                                      | NM_021231    |
|                                               | CAMK2G                                                | calcium/calmodulin-dependent protein kinase II gamma                                                                                       | NM_172171    |
|                                               | OAS1                                                  | 2'-5'-oligoadenylate synthetase 1, 40/46kDa                                                                                                | NM_002534    |
|                                               | UBE2L6                                                | ubiquitin-conjugating enzyme E2L 6                                                                                                         | NM_198183    |
|                                               | IFITM3                                                | interferon induced transmembrane protein 3                                                                                                 | NM_021034    |
|                                               | STAT3                                                 | signal transducer and activator of transcription 3 (acute-phase response factor)                                                           | NM_213662    |
|                                               | IRF7                                                  | interferon regulatory factor 7                                                                                                             | NM_004031    |
|                                               | IL1R2                                                 | interleukin 1 receptor, type II                                                                                                            | NM_004633    |
|                                               | AIF1                                                  | allograft inflammatory factor 1                                                                                                            | NM_004847    |
|                                               | CSF2RA                                                | colony stimulating factor 2 receptor, alpha, low-affinity (granulocyte-macrophage)<br>[Source:HGNC Symbol;Acc:HGNC:2435] [ENST00000381524] | HGNC:2435    |
|                                               | SELPLG                                                | selectin P ligand                                                                                                                          | NM_001206609 |
|                                               | IFNLR1                                                | interferon, lambda receptor 1                                                                                                              | NM_170743    |
|                                               | TNFRSF4                                               | tumor necrosis factor receptor superfamily, member 4                                                                                       | NM_003327    |
|                                               | IFNAR2                                                | interferon (alpha, beta and omega) receptor 2                                                                                              | NM_000874    |
| HLA-DRB3                                      | major histocompatibility complex, class II, DR beta 3 | NM_022555                                                                                                                                  |              |
| OCSTAMP                                       | osteoclast stimulatory transmembrane protein          | NM_080721                                                                                                                                  |              |
| RAE1                                          | ribonucleic acid export 1                             | NM_001015885                                                                                                                               |              |
| Cellular response to organonitrogen compounds | ATP6V0B                                               | ATPase, H <sup>+</sup> transporting, lysosomal 21kDa, V0 subunit b                                                                         | NM_004047    |
|                                               | AKT2                                                  | v-akt murine thymoma viral oncogene homolog 2                                                                                              | NM_001626    |
|                                               | EIF4G1                                                | eukaryotic translation initiation factor 4 gamma, 1                                                                                        | NM_182917    |
|                                               | GNB1                                                  | guanine nucleotide binding protein (G protein), beta polypeptide 1                                                                         | NM_002074    |
|                                               | HSP90B1                                               | heat shock protein 90kDa beta (Grp94), member 1                                                                                            | NM_003299    |
|                                               | RAPGEF1                                               | Rap guanine nucleotide exchange factor (GEF) 1                                                                                             | NM_198679    |
|                                               | UCP2                                                  | uncoupling protein 2 (mitochondrial, proton carrier)                                                                                       | NM_003355    |
|                                               | ATP6V0D1                                              | ATPase, H <sup>+</sup> transporting, lysosomal 38kDa, V0 subunit d1                                                                        | NM_004691    |
|                                               | STAT3                                                 | signal transducer and activator of transcription 3 (acute-phase response factor)                                                           | NM_213662    |
|                                               | HDAC5                                                 | histone deacetylase 5                                                                                                                      | NM_001015053 |
|                                               | SSH1                                                  | slingshot protein phosphatase 1                                                                                                            | NM_001161331 |
|                                               | GNG8                                                  | guanine nucleotide binding protein (G protein), gamma 8                                                                                    | NM_033258    |
|                                               | SREBF1                                                | sterol regulatory element binding transcription factor 1                                                                                   | NM_001005291 |
|                                               | UROS                                                  | uroporphyrinogen III synthase                                                                                                              | NM_000375    |
|                                               | PRKAG3                                                | protein kinase, AMP-activated, gamma 3 non-catalytic subunit                                                                               | NM_017431    |
|                                               | SH3BP4                                                | SH3-domain binding protein 4                                                                                                               | NM_014521    |
| AKT1                                          | v-akt murine thymoma viral oncogene homolog 1         | NM_005163                                                                                                                                  |              |
| PDPK1                                         | 3-phosphoinositide dependent protein kinase 1         | AF111845                                                                                                                                   |              |
| Response to hormones                          | ACSL1                                                 | acyl-CoA synthetase long-chain family member 1                                                                                             | NM_001995    |
|                                               | ATP6V0B                                               | ATPase, H <sup>+</sup> transporting, lysosomal 21kDa, V0 subunit b                                                                         | NM_004047    |
|                                               | MYOG                                                  | myogenin (myogenic factor 4)                                                                                                               | NM_002479    |
|                                               | AKT2                                                  | v-akt murine thymoma viral oncogene homolog 2                                                                                              | NM_001626    |
|                                               | EIF4G1                                                | eukaryotic translation initiation factor 4 gamma, 1                                                                                        | NM_182917    |
|                                               | GNB1                                                  | guanine nucleotide binding protein (G protein), beta polypeptide 1                                                                         | NM_002074    |
|                                               | RARG                                                  | retinoic acid receptor, gamma                                                                                                              | NM_000966    |
|                                               | UCP2                                                  | uncoupling protein 2 (mitochondrial, proton carrier)                                                                                       | NM_003355    |

|                                        |                                               |                                                                                  |                                                 |           |
|----------------------------------------|-----------------------------------------------|----------------------------------------------------------------------------------|-------------------------------------------------|-----------|
| Cellular re                            | ATP6V0D1                                      | ATPase, H+ transporting, lysosomal 38kDa, V0 subunit d1                          | NM_004691                                       |           |
|                                        | NR1H2                                         | nuclear receptor subfamily 1, group H, member 2                                  | NM_007121                                       |           |
|                                        | STAT3                                         | signal transducer and activator of transcription 3 (acute-phase response factor) | NM_213662                                       |           |
|                                        | HDAC5                                         | histone deacetylase 5                                                            | NM_001015053                                    |           |
|                                        | JUNB                                          | jun B proto-oncogene                                                             | NM_002229                                       |           |
|                                        | GATA1                                         | GATA binding protein 1 (globin transcription factor 1)                           | NM_002049                                       |           |
|                                        | GNG8                                          | guanine nucleotide binding protein (G protein), gamma 8                          | NM_033258                                       |           |
|                                        | SREBF1                                        | sterol regulatory element binding transcription factor 1                         | NM_001005291                                    |           |
|                                        | PRKAG3                                        | protein kinase, AMP-activated, gamma 3 non-catalytic subunit                     | NM_017431                                       |           |
|                                        | AKT1                                          | v-akt murine thymoma viral oncogene homolog 1                                    | NM_005163                                       |           |
|                                        | PDPK1                                         | 3-phosphoinositide dependent protein kinase 1                                    | AF111845                                        |           |
|                                        | OCSTAMP                                       | osteoclast stimulatory transmembrane protein                                     | NM_080721                                       |           |
|                                        | Chemotaxis                                    | CORO1A                                                                           | coronin, actin binding protein, 1A              | NM_007074 |
|                                        |                                               | ARHGEF16                                                                         | Rho guanine nucleotide exchange factor (GEF) 16 | NM_014448 |
| C5AR1                                  |                                               | complement component 5a receptor 1                                               | NM_001736                                       |           |
| FCER1G                                 |                                               | Fc fragment of IgE, high affinity I, receptor for; gamma polypeptide             | NM_004106                                       |           |
| SPTAN1                                 |                                               | spectrin, alpha, non-erythrocytic 1                                              | NM_003127                                       |           |
| POU4F2                                 |                                               | POU class 4 homeobox 2                                                           | NM_004575                                       |           |
| AGRN                                   |                                               | agrin                                                                            | NM_198576                                       |           |
| DVL1                                   |                                               | dishevelled segment polarity protein 1                                           | NM_004421                                       |           |
| RPS6KA4                                |                                               | ribosomal protein S6 kinase, 90kDa, polypeptide 4                                | NM_003942                                       |           |
| CXCL16                                 |                                               | chemokine (C-X-C motif) ligand 16                                                | NM_022059                                       |           |
| ITGB2                                  |                                               | integrin, beta 2 (complement component 3 receptor 3 and 4 subunit)               | L78790                                          |           |
| MYH14                                  |                                               | myosin, heavy chain 14, non-muscle                                               | NM_001077186                                    |           |
| ROBO3                                  |                                               | roundabout, axon guidance receptor, homolog 3 (Drosophila)                       | NM_022370                                       |           |
| MYO9B                                  |                                               | myosin IXB                                                                       | NM_004145                                       |           |
| AP2B1                                  |                                               | adaptor-related protein complex 2, beta 1 subunit                                | NM_001030006                                    |           |
| COL6A2                                 |                                               | collagen, type VI, alpha 2                                                       | NM_058174                                       |           |
| PLEKHG5                                |                                               | pleckstrin homology domain containing, family G (with RhoGef domain) member 5    | NM_001265594                                    |           |
| RHOG                                   |                                               | ras homolog family member G                                                      | NM_001665                                       |           |
| LAMB1                                  |                                               | laminin, beta 1                                                                  |                                                 |           |
| CMTM7                                  |                                               | CKLF-like MARVEL transmembrane domain containing 7                               | NM_138410                                       |           |
| KCNQ2                                  |                                               | potassium channel, voltage gated KQT-like subfamily Q, member 2                  | NM_172109                                       |           |
| NFASC                                  | neurofascin                                   | NM_001005389                                                                     |                                                 |           |
| DPYSL4                                 | dihydropyrimidinase-like 4                    | NM_006426                                                                        |                                                 |           |
| Cellular response to insulin stimulus  | ATP6V0B                                       | ATPase, H+ transporting, lysosomal 21kDa, V0 subunit b                           | NM_004047                                       |           |
|                                        | AKT2                                          | v-akt murine thymoma viral oncogene homolog 2                                    | NM_001626                                       |           |
|                                        | EIF4G1                                        | eukaryotic translation initiation factor 4 gamma, 1                              | NM_182917                                       |           |
|                                        | UCP2                                          | uncoupling protein 2 (mitochondrial, proton carrier)                             | NM_003355                                       |           |
|                                        | ATP6V0D1                                      | ATPase, H+ transporting, lysosomal 38kDa, V0 subunit d1                          | NM_004691                                       |           |
|                                        | HDAC5                                         | histone deacetylase 5                                                            | NM_001015053                                    |           |
|                                        | SREBF1                                        | sterol regulatory element binding transcription factor 1                         | NM_001005291                                    |           |
|                                        | PRKAG3                                        | protein kinase, AMP-activated, gamma 3 non-catalytic subunit                     | NM_017431                                       |           |
|                                        | AKT1                                          | v-akt murine thymoma viral oncogene homolog 1                                    | NM_005163                                       |           |
| PDPK1                                  | 3-phosphoinositide dependent protein kinase 1 | AF111845                                                                         |                                                 |           |
| Cellular response to chemical stimulus | WNT10A                                        | wingless-type MMTV integration site family, member 10A                           | NM_025216                                       |           |
|                                        | CORO1A                                        | coronin, actin binding protein, 1A                                               | NM_007074                                       |           |
|                                        | ACSL1                                         | acyl-CoA synthetase long-chain family member 1                                   | NM_001995                                       |           |
|                                        | ARHGEF16                                      | Rho guanine nucleotide exchange factor (GEF) 16                                  | NM_014448                                       |           |
|                                        | PRDX5                                         | peroxiredoxin 5                                                                  | NM_012094                                       |           |
|                                        | DUSP4                                         | dual specificity phosphatase 4                                                   | NM_001394                                       |           |
|                                        | CHI3L1                                        | chitinase 3-like 1 (cartilage glycoprotein-39)                                   | NM_001276                                       |           |
|                                        | ATP6V0B                                       | ATPase, H+ transporting, lysosomal 21kDa, V0 subunit b                           | NM_004047                                       |           |
|                                        | CYP26A1                                       | cytochrome P450, family 26, subfamily A, polypeptide 1                           | NM_057157                                       |           |
|                                        | GAPDH                                         | glyceraldehyde-3-phosphate dehydrogenase                                         | NM_002046                                       |           |
|                                        | IL2RG                                         | interleukin 2 receptor, gamma                                                    | NM_000206                                       |           |
|                                        | C5AR1                                         | complement component 5a receptor 1                                               | NM_001736                                       |           |
|                                        | MYOG                                          | myogenin (myogenic factor 4)                                                     | NM_002479                                       |           |
|                                        | FCER1G                                        | Fc fragment of IgE, high affinity I, receptor for; gamma polypeptide             | NM_004106                                       |           |
|                                        | CTGF                                          | connective tissue growth factor                                                  | NM_001901                                       |           |

|          |                                                                                    |              |
|----------|------------------------------------------------------------------------------------|--------------|
| MKNK1    | MAP kinase interacting serine/threonine kinase 1                                   | NM_003684    |
| MAPKAPK2 | mitogen-activated protein kinase-activated protein kinase 2                        | NM_004759    |
| GSTO2    | glutathione S-transferase omega 2                                                  | NM_183239    |
| OAS2     | 2'-5'-oligoadenylate synthetase 2, 69/71kDa                                        | NM_016817    |
| ACADVL   | acyl-CoA dehydrogenase, very long chain                                            | NM_000018    |
| AKT2     | v-akt murine thymoma viral oncogene homolog 2                                      | NM_001626    |
| ACSS2    | acyl-CoA synthetase short-chain family member 2                                    | NM_018677    |
| EIF4G1   | eukaryotic translation initiation factor 4 gamma, 1                                | NM_182917    |
| GNB1     | guanine nucleotide binding protein (G protein), beta polypeptide 1                 | NM_002074    |
| HSP90B1  | heat shock protein 90kDa beta (Grp94), member 1                                    | NM_003299    |
| RAPGEF1  | Rap guanine nucleotide exchange factor (GEF) 1                                     | NM_198679    |
| RPS6KA4  | ribosomal protein S6 kinase, 90kDa, polypeptide 4                                  | NM_003942    |
| MYD88    | myeloid differentiation primary response 88                                        | NM_002468    |
| CACTIN   | actin, spliceosome C complex subunit                                               | NM_021231    |
| CXCL16   | chemokine (C-X-C motif) ligand 16                                                  | NM_022059    |
| RARG     | retinoic acid receptor, gamma                                                      | NM_000966    |
| ACER1    | alkaline ceramidase 1                                                              | NM_133492    |
| ITGB2    | integrin, beta 2 (complement component 3 receptor 3 and 4 subunit)                 | L78790       |
| CAMK2G   | calcium/calmodulin-dependent protein kinase II gamma                               | NM_172171    |
| UCP2     | uncoupling protein 2 (mitochondrial, proton carrier)                               | NM_003355    |
| PLK3     | polo-like kinase 3                                                                 | NM_004073    |
| DGAT2    | diacylglycerol O-acyltransferase 2                                                 | NM_032564    |
| ATP6V0D1 | ATPase, H+ transporting, lysosomal 38kDa, V0 subunit d1                            | NM_004691    |
| NR1H2    | nuclear receptor subfamily 1, group H, member 2                                    | NM_007121    |
| OAS1     | 2'-5'-oligoadenylate synthetase 1, 40/46kDa                                        | NM_002534    |
| UBE2L6   | ubiquitin-conjugating enzyme E2L 6                                                 | NM_198183    |
| SRPR     | signal recognition particle receptor (docking protein)                             | NM_003139    |
| IFITM3   | interferon induced transmembrane protein 3                                         | NM_021034    |
| PHLPP1   | PH domain and leucine rich repeat protein phosphatase 1                            | NM_194449    |
| STAT3    | signal transducer and activator of transcription 3 (acute-phase response factor)   | NM_213662    |
| HDAC5    | histone deacetylase 5                                                              | NM_001015053 |
| PRDX2    | peroxiredoxin 2                                                                    | NM_005809    |
| JUNB     | jun B proto-oncogene                                                               | NM_002229    |
| MYO9B    | myosin IXB                                                                         | NM_004145    |
| AP2B1    | adaptor-related protein complex 2, beta 1 subunit                                  | NM_001030006 |
| SSH1     | slingshot protein phosphatase 1                                                    | NM_001161331 |
| HTRA2    | HtrA serine peptidase 2                                                            | NM_145074    |
| GATA1    | GATA binding protein 1 (globin transcription factor 1)                             | NM_002049    |
| IRF7     | interferon regulatory factor 7                                                     | NM_004031    |
| TPP1     | tripeptidyl peptidase I                                                            | NM_000391    |
| IL1R2    | interleukin 1 receptor, type II                                                    | NM_004633    |
| GNG8     | guanine nucleotide binding protein (G protein), gamma 8                            | NM_033258    |
| AIF1     | allograft inflammatory factor 1                                                    | NM_004847    |
| SREBF1   | sterol regulatory element binding transcription factor 1                           | NM_001005291 |
| CSF2RA   | colony stimulating factor 2 receptor, alpha, low-affinity (granulocyte-macrophage) |              |
| UROS     | uroporphyrinogen III synthase                                                      | NM_000375    |
| GPX1     | glutathione peroxidase 1                                                           | NM_201397    |
| PRKAG3   | protein kinase, AMP-activated, gamma 3 non-catalytic subunit                       | NM_017431    |
| SELPLG   | selectin P ligand                                                                  | NM_001206609 |
| GSTA3    | glutathione S-transferase alpha 3                                                  | NM_000847    |
| CMA1     | chymase 1, mast cell                                                               | NM_001836    |
| IFNLR1   | interferon, lambda receptor 1                                                      | NM_170743    |
| PLEKHG5  | pleckstrin homology domain containing, family G (with RhoGef domain) member 5      | NM_001265594 |
| SH3BP4   | SH3-domain binding protein 4                                                       | NM_014521    |
| AKT1     | v-akt murine thymoma viral oncogene homolog 1                                      | NM_005163    |
| TNFRSF4  | tumor necrosis factor receptor superfamily, member 4                               | NM_003327    |
| MTRR     | 5-methyltetrahydrofolate-homocysteine methyltransferase reductase                  | NM_002454    |
| NOS3     | nitric oxide synthase 3 (endothelial cell)                                         | NM_000603    |
| LMNA     | lamin A/C                                                                          | NM_170707    |
| RHOG     | ras homolog family member G                                                        | NM_001665    |
| HIF3A    | hypoxia inducible factor 3, alpha subunit                                          | XR_243952    |
| PDPK1    | 3-phosphoinositide dependent protein kinase 1                                      | AF111845     |
| IFNAR2   | interferon (alpha, beta and omega) receptor 2                                      | NM_000874    |

|          |                                                        |              |
|----------|--------------------------------------------------------|--------------|
| ALDH3B1  | aldehyde dehydrogenase 3 family, member B1             | NM_001161473 |
| LTK      | leukocyte receptor tyrosine kinase                     | NM_002344    |
| HLA-DRB3 | major histocompatibility complex, class II, DR beta 3  | NM_022555    |
| TFDP2    | transcription factor Dp-2 (E2F dimerization partner 2) | NM_001178138 |
| PDE4A    | phosphodiesterase 4A, cAMP-specific                    | NM_001111307 |
| FKBP1A   | FK506 binding protein 1A, 12kDa                        | NM_000801    |
| OCSTAMP  | osteoclast stimulatory transmembrane protein           | NM_080721    |
| MPV17    | MpV17 mitochondrial inner membrane protein             | NM_002437    |
| RAE1     | ribonucleic acid export 1                              | NM_001015885 |
| RET      | ret proto-oncogene                                     | NM_020630    |

---

---
