# Supplementary material for: Transcriptional signature associated with early rheumatoid arthritis and healthy individuals at high risk to develop the disease
Source: PubMed Central journal article supplement (PMC5870959; doi:10.1371/journal.pone.0194205), 2018-03-27
Supplement: pone.0194205.s011.pdf [file pone.0194205.s011.pdf]

**Supplementary table 11. Biological function of the 2 fold change Up-regulated genes according GO analysis in RA**

| Biological function          | Gene Symbol | Gene Name                                                         | Genebank Accession |
|------------------------------|-------------|-------------------------------------------------------------------|--------------------|
| Inflammatory response        | KLKB1       | kallikrein B, plasma (Fletcher factor) 1                          | NM_000892          |
|                              | HRH4        | histamine receptor H4                                             | NM_021624          |
|                              | ANO6        | anoctamin 6                                                       | NM_001025356       |
|                              | CCL11       | chemokine (C-C motif) ligand 11                                   | NM_002986          |
|                              | ADORA1      | adenosine A1 receptor                                             | NM_000674          |
|                              | ANXA1       | annexin A1                                                        | NM_000700          |
|                              | CLEC7A      | C-type lectin domain family 7, member A                           | NM_197947          |
|                              | VNN1        | vanin 1                                                           | NM_004666          |
| Cell projection organization | ACTR3       | ARP3 actin-related protein 3 homolog (yeast)                      | NM_005721          |
|                              | RB1         | retinoblastoma 1                                                  | NM_000321          |
|                              | BBS7        | Bardet-Biedl syndrome 7                                           | NM_018190          |
|                              | ERBB3       | v-erb-b2 erythroblastic leukemia viral oncogene homolog 3 (avian) | NM_001982          |
|                              | BCL2        | B-cell CLL/lymphoma 2                                             | NM_000633          |
|                              | DNM3        | dynamamin 3                                                       | NM_015569          |
|                              | EGR2        | early growth response 2                                           | NM_000399          |
|                              | SPTA1       | spectrin, alpha, erythrocytic 1 (elliptocytosis 2)                | NM_003126          |
|                              | ROBO3       | roundabout, axon guidance receptor, homolog 3 (Drosophila)        | NM_022370          |
|                              | SLITRK5     | SLIT and NTRK-like family, member 5                               | NM_015567          |
|                              | ETV4        | ets variant 4                                                     | NM_001079675       |
|                              | LHFPL5      | lipoma HMGIC fusion partner-like 5                                | NM_182548          |
|                              | NCK2        | NCK adaptor protein 2                                             | NM_003581          |
|                              | WNT5A       | wingless-type MMTV integration site family, member 5A             | NM_003392          |
|                              | MEF2A       | myocyte enhancer factor 2A                                        | NM_001171894       |
|                              | CNTNAP2     | contactin associated protein-like 2                               | NM_014141          |
|                              | COL9A2      | collagen, type IX, alpha 2                                        | BC065715           |
|                              | DNAAF1      | dynein, axonemal, assembly factor 1                               | NM_178452          |
|                              | EPHB2       | EPH receptor B2                                                   | NM_004442          |
|                              | FZD6        | frizzled family receptor 6                                        | NM_003506          |
| Signal transduction          | CXCL12      | chemokine (C-X-C motif) ligand 12                                 | NM_001033886       |
|                              | ATP6V1E1    | ATPase, H+ transporting, lysosomal 31kDa, V1 subunit E1           | NM_001696          |
|                              | AGTR1       | angiotensin II receptor, type 1                                   | NM_031850          |
|                              | SHOC2       | soc-2 suppressor of clear homolog (C. elegans)                    | NM_007373          |
|                              | RB1         | retinoblastoma 1                                                  | NM_000321          |
|                              | TRAT1       | T cell receptor associated transmembrane adaptor 1                | NM_016388          |
|                              | FGF1        | fibroblast growth factor 1 (acidic)                               | NM_000800          |
|                              | ATP6V0E1    | ATPase, H+ transporting, lysosomal 9kDa, V0 subunit e1            | NM_003945          |
|                              | EGR1        | early growth response 1                                           | NM_001964          |
|                              | WSB2        | WD repeat and SOCS box containing 2                               | NM_018639          |
|                              | LPAR6       | lysophosphatidic acid receptor 6                                  | NM_005767          |
|                              | CTNNB1      | catenin (cadherin-associated protein), beta 1, 88kDa              | NM_001904          |
|                              | STC1        | stanniocalcin 1                                                   | NM_003155          |
|                              | INADL       | InaD-like (Drosophila)                                            | NM_176877          |
|                              | HCAR2       | hydroxycarboxylic acid receptor 2                                 | NM_177551          |
|                              | TAS2R50     | taste receptor, type 2, member 50                                 | NM_176890          |
|                              | ERBB3       | v-erb-b2 erythroblastic leukemia viral oncogene homolog 3 (avian) | NM_001982          |
|                              | BCL2        | B-cell CLL/lymphoma 2                                             | NM_000633          |
|                              | RGS12       | regulator of G-protein signaling 12                               | NM_002926          |
|                              | AHRR        | aryl-hydrocarbon receptor repressor                               | NM_020731          |
|                              | ITPKB       | inositol-trisphosphate 3-kinase B                                 | NM_002221          |
|                              | HRH4        | histamine receptor H4                                             | NM_021624          |
|                              | RAB2B       | RAB2B, member RAS oncogene family                                 | NM_032846          |
|                              | DACT1       | dapper, antagonist of beta-catenin, homolog 1 (Xenopus laevis)    | NM_016651          |
|                              | CCL11       | chemokine (C-C motif) ligand 11                                   | NM_002986          |

|          |                                                                                 |              |
|----------|---------------------------------------------------------------------------------|--------------|
| NPPA     | natriuretic peptide A                                                           | NM_006172    |
| ADORA1   | adenosine A1 receptor                                                           | NM_000674    |
| EVI2A    | ecotropic viral integration site 2A                                             | NM_001003927 |
| PLCL2    | phospholipase C-like 2                                                          | NM_015184    |
| LRP12    | low density lipoprotein receptor-related protein 12                             | NM_013437    |
| CNTNAP3  | contactin associated protein-like 3                                             | NM_033655    |
| ANXA1    | annexin A1                                                                      | NM_000700    |
| UBE3A    | ubiquitin protein ligase E3A                                                    | NM_130839    |
| CLEC7A   | C-type lectin domain family 7, member A                                         | NM_197947    |
| TANK     | TRAF family member-associated NFKB activator                                    | NM_133484    |
| NDFIP2   | Nedd4 family interacting protein 2                                              | NM_019080    |
| PIK3R1   | phosphoinositide-3-kinase, regulatory subunit 1 (alpha)                         | NM_181523    |
| RIN2     | Ras and Rab interactor 2                                                        | NM_018993    |
| XPR1     | xenotropic and polytropic retrovirus receptor 1                                 | NM_004736    |
| CX3CL1   | chemokine (C-X3-C motif) ligand 1                                               | NM_002996    |
| RAB39B   | RAB39B, member RAS oncogene family                                              | NM_171998    |
| ARHGAP28 | Rho GTPase activating protein 28                                                | NM_001010000 |
| STK17B   | serine/threonine kinase 17b                                                     | NM_004226    |
| BMPR2    | bone morphogenetic protein receptor, type II (serine/threonine kinase)          | NM_001204    |
| WNK1     | WNK lysine deficient protein kinase 1                                           | NM_001184985 |
| PTEN     | phosphatase and tensin homolog                                                  | NM_000314    |
| ASB7     | ankyrin repeat and SOCS box containing 7                                        | NM_198243    |
| TGM2     | transglutaminase 2 (C polypeptide, protein-glutamine-gamma-glutamyltransferase) | NM_198951    |
| NR1D2    | nuclear receptor subfamily 1, group D, member 2                                 | NM_005126    |
| HSPA5    | heat shock 70kDa protein 5 (glucose-regulated protein, 78kDa)                   | NM_005347    |
| RCAN2    | regulator of calcineurin 2                                                      | NM_005822    |
| ARHGAP18 | Rho GTPase activating protein 18                                                | NM_033515    |
| ARID5B   | AT rich interactive domain 5B (MRF1-like)                                       | NM_032199    |
| RGSL1    | regulator of G-protein signaling like 1                                         | NM_001137669 |
| CLEC2D   | C-type lectin domain family 2, member D                                         | NM_001004419 |
| PTPRK    | protein tyrosine phosphatase, receptor type, K                                  | NM_002844    |
| TXNDC17  | thioredoxin domain containing 17                                                | NM_032731    |
| NR3C1    | nuclear receptor subfamily 3, group C, member 1 (glucocorticoid receptor)       | NM_001018077 |
| EPHB4    | EPH receptor B4                                                                 | NM_004444    |
| INSIG1   | insulin induced gene 1                                                          | NM_005542    |
| GPR78    | G protein-coupled receptor 78                                                   | NM_080819    |
| LIMD1    | LIM domains containing 1                                                        | NM_014240    |
| ARHGAP40 | Rho GTPase activating protein 40                                                | NM_001164431 |
| CD69     | CD69 molecule                                                                   | AK303383     |
| PRKAA1   | protein kinase, AMP-activated, alpha 1 catalytic subunit                        | NM_206907    |
| NCK2     | NCK adaptor protein 2                                                           | NM_003581    |
| NCS1     | neuronal calcium sensor 1                                                       | NM_014286    |
| ATF1     | activating transcription factor 1                                               | NM_005171    |
| GCG      | glucagon                                                                        | NM_002054    |
| NR2C1    | nuclear receptor subfamily 2, group C, member 1                                 | NM_001032287 |
| PTPRJ    | protein tyrosine phosphatase, receptor type, J                                  | NM_001098503 |
| SUMO1    | SMT3 suppressor of mif two 3 homolog 1 (S. cerevisiae)                          | NM_003352    |
| WNT5A    | wingless-type MMTV integration site family, member 5A                           | NM_003392    |
| MEF2A    | myocyte enhancer factor 2A                                                      | NM_001171894 |
| GPX1     | glutathione peroxidase 1                                                        | NM_201397    |
| OR5AN1   | olfactory receptor, family 5, subfamily AN, member 1                            | NM_001004729 |
| STAP1    | signal transducing adaptor family member 1                                      | NM_012108    |
| CNTNAP2  | contactin associated protein-like 2                                             | NM_014141    |
| EPHB2    | EPH receptor B2                                                                 | NM_004442    |
| STK17B   | serine/threonine kinase 17b                                                     | BC052561     |
| SKAP2    | src kinase associated phosphoprotein 2                                          | NM_003930    |
| WNT4     | wingless-type MMTV integration site family, member 4                            | NM_030761    |
| DIXDC1   | DIX domain containing 1                                                         | NM_001037954 |

|                                        |                                                                           |                                                                           |              |
|----------------------------------------|---------------------------------------------------------------------------|---------------------------------------------------------------------------|--------------|
| Cellular response to chemical stimulus | FZD6                                                                      | frizzled family receptor 6                                                | NM_003506    |
|                                        | MRGPRX2                                                                   | MAS-related GPR, member X2                                                | NM_054030    |
|                                        | LRRD1                                                                     | leucine-rich repeats and death domain containing 1                        | NM_001161528 |
|                                        | OR4D1                                                                     | olfactory receptor, family 4, subfamily D, member 1                       | NM_012374    |
|                                        | OR51E1                                                                    | olfactory receptor, family 51, subfamily E, member 1                      | NM_152430    |
|                                        | CXCL12                                                                    | chemokine (C-X-C motif) ligand 12                                         | NM_001033886 |
|                                        | NR3C1                                                                     | nuclear receptor subfamily 3, group C, member 1 (glucocorticoid receptor) | NM_001018077 |
|                                        | CYP39A1                                                                   | cytochrome P450, family 39, subfamily A, polypeptide 1                    | NM_016593    |
|                                        | CLIC4                                                                     | chloride intracellular channel 4                                          | NM_013943    |
|                                        | ATP6V1E1                                                                  | ATPase, H+ transporting, lysosomal 31kDa, V1 subunit E1                   | NM_001696    |
|                                        | AGTR1                                                                     | angiotensin II receptor, type 1                                           | NM_031850    |
|                                        | SHOC2                                                                     | soc-2 suppressor of clear homolog (C. elegans)                            | NM_007373    |
|                                        | FGF1                                                                      | fibroblast growth factor 1 (acidic)                                       | NM_000800    |
|                                        | ATP6V0E1                                                                  | ATPase, H+ transporting, lysosomal 9kDa, V0 subunit e1                    | NM_003945    |
|                                        | EGR1                                                                      | early growth response 1                                                   | NM_001964    |
|                                        | SNCA                                                                      | synuclein, alpha (non A4 component of amyloid precursor)                  | NM_007308    |
|                                        | STC1                                                                      | stanniocalcin 1                                                           | NM_003155    |
|                                        | ERBB3                                                                     | v-erb-b2 erythroblastic leukemia viral oncogene homolog 3 (avian)         | NM_001982    |
|                                        | PRDX3                                                                     | peroxiredoxin 3                                                           | NM_006793    |
|                                        | CCL11                                                                     | chemokine (C-C motif) ligand 11                                           | NM_002986    |
| FABP4                                  | fatty acid binding protein 4, adipocyte                                   | NM_001442                                                                 |              |
| ANXA1                                  | annexin A1                                                                | NM_000700                                                                 |              |
| CLEC7A                                 | C-type lectin domain family 7, member A                                   | NM_197947                                                                 |              |
| PIK3R1                                 | phosphoinositide-3-kinase, regulatory subunit 1 (alpha)                   | NM_181523                                                                 |              |
| SERPINB9                               | serpin peptidase inhibitor, clade B (ovalbumin), member 9                 | NM_004155                                                                 |              |
| CYP2B6                                 | cytochrome P450, family 2, subfamily B, polypeptide 6                     | NM_000767                                                                 |              |
| CX3CL1                                 | chemokine (C-X3-C motif) ligand 1                                         | NM_002996                                                                 |              |
| HMGCS1                                 | 3-hydroxy-3-methylglutaryl-CoA synthase 1 (soluble)                       | NM_002130                                                                 |              |
| ETS1                                   | v-ets erythroblastosis virus E26 oncogene homolog 1 (avian)               | NM_005238                                                                 |              |
| PTEN                                   | phosphatase and tensin homolog                                            | NM_000314                                                                 |              |
| NR1D2                                  | nuclear receptor subfamily 1, group D, member 2                           | NM_005126                                                                 |              |
| HSPA5                                  | heat shock 70kDa protein 5 (glucose-regulated protein, 78kDa)             | NM_005347                                                                 |              |
| PTPRK                                  | protein tyrosine phosphatase, receptor type, K                            | NM_002844                                                                 |              |
| TXNDC17                                | thioredoxin domain containing 17                                          | NM_032731                                                                 |              |
| NR3C1                                  | nuclear receptor subfamily 3, group C, member 1 (glucocorticoid receptor) | NM_001018077                                                              |              |
| CD69                                   | CD69 molecule                                                             | AK303383                                                                  |              |
| PRKAA1                                 | protein kinase, AMP-activated, alpha 1 catalytic subunit                  | NM_206907                                                                 |              |
| ATF1                                   | activating transcription factor 1                                         | NM_005171                                                                 |              |
| GCG                                    | glucagon                                                                  | NM_002054                                                                 |              |
| NR2C1                                  | nuclear receptor subfamily 2, group C, member 1                           | NM_001032287                                                              |              |
| SUMO1                                  | SMT3 suppressor of mif two 3 homolog 1 (S. cerevisiae)                    | NM_003352                                                                 |              |
| MEF2A                                  | myocyte enhancer factor 2A                                                | NM_001171894                                                              |              |
| RBM3                                   | RNA binding motif (RNP1, RRM) protein 3                                   | NM_006743                                                                 |              |
| GPX1                                   | glutathione peroxidase 1                                                  | NM_201397                                                                 |              |
| UGDH                                   | UDP-glucose 6-dehydrogenase                                               | NM_003359                                                                 |              |
| WNT4                                   | wingless-type MMTV integration site family, member 4                      | NM_030761                                                                 |              |
| Defence response                       | CXCL12                                                                    | chemokine (C-X-C motif) ligand 12                                         | NM_001033886 |
|                                        | NR3C1                                                                     | nuclear receptor subfamily 3, group C, member 1 (glucocorticoid receptor) | NM_001018077 |
|                                        | BNIP3L                                                                    | BCL2/adenovirus E1B 19kDa interacting protein 3-like                      | NM_004331    |
|                                        | HP                                                                        | haptoglobin                                                               | NM_005143    |
|                                        | TRAT1                                                                     | T cell receptor associated transmembrane adaptor 1                        | NM_016388    |
|                                        | EGR1                                                                      | early growth response 1                                                   | NM_001964    |
|                                        | C1S                                                                       | complement component 1, s subcomponent                                    | NM_001734    |
|                                        | KLKB1                                                                     | kallikrein B, plasma (Fletcher factor) 1                                  | NM_000892    |
|                                        | SNCA                                                                      | synuclein, alpha (non A4 component of amyloid precursor)                  | NM_007308    |
|                                        | DEFA4                                                                     | defensin, alpha 4, corticostatin                                          | NM_001925    |

|                                 |                                                              |                                                                              |              |
|---------------------------------|--------------------------------------------------------------|------------------------------------------------------------------------------|--------------|
| Immune response                 | BCL2                                                         | B-cell CLL/lymphoma 2                                                        | NM_000633    |
|                                 | HRH4                                                         | histamine receptor H4                                                        | NM_021624    |
|                                 | ANO6                                                         | anoctamin 6                                                                  | NM_001025356 |
|                                 | TFF3                                                         | trefoil factor 3 (intestinal)                                                | NM_003226    |
|                                 | DEFB126                                                      | defensin, beta 126                                                           | NM_030931    |
|                                 | CCL11                                                        | chemokine (C-C motif) ligand 11                                              | NM_002986    |
|                                 | ADORA1                                                       | adenosine A1 receptor                                                        | NM_000674    |
|                                 | ANXA1                                                        | annexin A1                                                                   | NM_000700    |
|                                 | CLEC7A                                                       | C-type lectin domain family 7, member A                                      | NM_197947    |
|                                 | TANK                                                         | TRAF family member-associated NFKB activator                                 | NM_133484    |
|                                 | CX3CL1                                                       | chemokine (C-X3-C motif) ligand 1                                            | NM_002996    |
|                                 | ATF1                                                         | activating transcription factor 1                                            | NM_005171    |
|                                 | SUMO1                                                        | SMT3 suppressor of mif two 3 homolog 1 (S. cerevisiae)                       | NM_003352    |
|                                 | MEF2A                                                        | myocyte enhancer factor 2A                                                   | NM_001171894 |
|                                 | HTN1                                                         | histatin 1                                                                   | NM_002159    |
|                                 | KRT1                                                         | keratin 1                                                                    | NM_006121    |
|                                 | BNIP3L                                                       | BCL2/adenovirus E1B 19kDa interacting protein 3-like                         | NM_004331    |
|                                 | VNN1                                                         | vanin 1                                                                      | NM_004666    |
|                                 | SERPING1                                                     | serpin peptidase inhibitor, clade G (C1 inhibitor), member 1                 |              |
|                                 | EGR1                                                         | early growth response 1                                                      | NM_001964    |
|                                 | C1S                                                          | complement component 1, s subcomponent                                       | NM_001734    |
|                                 | SNCA                                                         | synuclein, alpha (non A4 component of amyloid precursor)                     | NM_007308    |
|                                 | POU2AF1                                                      | POU class 2 associating factor 1                                             | NM_006235    |
|                                 | BCL2                                                         | B-cell CLL/lymphoma 2                                                        | NM_000633    |
|                                 | CCL11                                                        | chemokine (C-C motif) ligand 11                                              | NM_002986    |
|                                 | CLEC7A                                                       | C-type lectin domain family 7, member A                                      | NM_197947    |
|                                 | TANK                                                         | TRAF family member-associated NFKB activator                                 | NM_133484    |
|                                 | SERPINB9                                                     | serpin peptidase inhibitor, clade B (ovalbumin), member 9                    | NM_004155    |
|                                 | CX3CL1                                                       | chemokine (C-X3-C motif) ligand 1                                            | NM_002996    |
|                                 | ETS1                                                         | v-ets erythroblastosis virus E26 oncogene homolog 1 (avian)                  | NM_005238    |
|                                 | ATF1                                                         | activating transcription factor 1                                            | NM_005171    |
|                                 | SUMO1                                                        | SMT3 suppressor of mif two 3 homolog 1 (S. cerevisiae)                       | NM_003352    |
|                                 | MEF2A                                                        | myocyte enhancer factor 2A                                                   | NM_001171894 |
| KRT1                            | keratin 1                                                    | NM_006121                                                                    |              |
| VNN1                            | vanin 1                                                      | NM_004666                                                                    |              |
| MS4A1                           | membrane-spanning 4-domains, subfamily A, member 1           | NM_152866                                                                    |              |
| SERPING1                        | serpin peptidase inhibitor, clade G (C1 inhibitor), member 1 |                                                                              |              |
| CXCL12                          | chemokine (C-X-C motif) ligand 12                            | NM_001033886                                                                 |              |
| Regulation of metabolic process | USP1                                                         | ubiquitin specific peptidase 1                                               | NM_003368    |
|                                 | TCEA1                                                        | transcription elongation factor A (SII), 1                                   | NM_006756    |
|                                 | AKAP6                                                        | A kinase (PRKA) anchor protein 6                                             | NM_004274    |
|                                 | FEM1B                                                        | fem-1 homolog b (C. elegans)                                                 | NM_015322    |
|                                 | TAF1B                                                        | TATA box binding protein (TBP)-associated factor, RNA polymerase I, B, 63kDa | NM_005680    |
|                                 | AGTR1                                                        | angiotensin II receptor, type 1                                              | NM_031850    |
|                                 | SHOC2                                                        | soc-2 suppressor of clear homolog (C. elegans)                               | NM_007373    |
|                                 | RB1                                                          | retinoblastoma 1                                                             | NM_000321    |
|                                 | HP                                                           | haptoglobin                                                                  | NM_005143    |
|                                 | ZNF217                                                       | zinc finger protein 217                                                      | NM_006526    |
|                                 | TRAT1                                                        | T cell receptor associated transmembrane adaptor 1                           | NM_016388    |
|                                 | HNRPDL                                                       | heterogeneous nuclear ribonucleoprotein D-like                               | NM_031372    |
|                                 | FGF1                                                         | fibroblast growth factor 1 (acidic)                                          | NM_000800    |
|                                 | CAST                                                         | calpastatin                                                                  | NM_001042440 |
|                                 | EGR1                                                         | early growth response 1                                                      | NM_001964    |
|                                 | KLKB1                                                        | kallikrein B, plasma (Fletcher factor) 1                                     | NM_000892    |
|                                 | CTNNB1                                                       | catenin (cadherin-associated protein), beta 1, 88kDa                         | NM_001904    |
|                                 | SNCA                                                         | synuclein, alpha (non A4 component of amyloid precursor)                     | NM_007308    |

|          |                                                                                  |              |
|----------|----------------------------------------------------------------------------------|--------------|
| L3MBTL3  | l(3)mbt-like 3 (Drosophila)                                                      | NM_032438    |
| POU2AF1  | POU class 2 associating factor 1                                                 | NM_006235    |
| MORC3    | MORC family CW-type zinc finger 3                                                | NM_015358    |
| HCAR2    | hydroxycarboxylic acid receptor 2                                                | NM_177551    |
| C17orf42 | chromosome 17 open reading frame 42                                              | NM_024683    |
| ERBB3    | v-erb-b2 erythroblastic leukemia viral oncogene homolog 3 (avian)                | NM_001982    |
| BCL2     | B-cell CLL/lymphoma 2                                                            | NM_000633    |
| RGS12    | regulator of G-protein signaling 12                                              | NM_002926    |
| AHRR     | aryl-hydrocarbon receptor repressor                                              | NM_020731    |
| ZNF664   | zinc finger protein 664                                                          | NM_152437    |
| ACER1    | alkaline ceramidase 1                                                            | NM_133492    |
| E2F2     | E2F transcription factor 2                                                       | NM_004091    |
| TBC1D9   | TBC1 domain family, member 9 (with GRAM domain)                                  | NM_015130    |
| SBF2     | SET binding factor 2                                                             | NM_030962    |
| ZFX4     | zinc finger homeobox 4                                                           | NM_024721    |
| EGR2     | early growth response 2                                                          | NM_000399    |
| MKL2     | MKL/myocardin-like 2                                                             | NM_014048    |
| PRDX3    | peroxiredoxin 3                                                                  | NM_006793    |
| CCL11    | chemokine (C-C motif) ligand 11                                                  | NM_002986    |
| MOSPD1   | motile sperm domain containing 1                                                 | NM_019556    |
| ADORA1   | adenosine A1 receptor                                                            | NM_000674    |
| ZBTB6    | zinc finger and BTB domain containing 6                                          | NM_006626    |
| SOX13    | SRY (sex determining region Y)-box 13                                            | NM_005686    |
| YEATS4   | YEATS domain containing 4                                                        | NM_006530    |
| FABP4    | fatty acid binding protein 4, adipocyte                                          | NM_001442    |
| ZNF334   | zinc finger protein 334                                                          | NM_199441    |
| TSC2D2   | TSC22 domain family, member 2                                                    | NM_014779    |
| ANXA1    | annexin A1                                                                       | NM_000700    |
| WFDC2    | WAP four-disulfide core domain 2                                                 | NM_006103    |
| PBX1     | pre-B-cell leukemia homeobox 1                                                   | NM_002585    |
| UBE3A    | ubiquitin protein ligase E3A                                                     | NM_130839    |
| ANP32E   | acidic (leucine-rich) nuclear phosphoprotein 32 family, member E                 | NM_030920    |
| NDFIP2   | Nedd4 family interacting protein 2                                               | NM_019080    |
| MEAF6    | MYST/Esa1-associated factor 6                                                    | NM_022756    |
| PIK3R1   | phosphoinositide-3-kinase, regulatory subunit 1 (alpha)                          | NM_181523    |
| SERPINB9 | serpin peptidase inhibitor, clade B (ovalbumin), member 9                        | NM_004155    |
| RIN2     | Ras and Rab interactor 2                                                         | NM_018993    |
| HNRNPH1  | heterogeneous nuclear ribonucleoprotein H1 (H)                                   | NM_005520    |
| KNDC1    | kinase non-catalytic C-lobe domain (KIND) containing 1                           | NM_152643    |
| FLI1     | Friend leukemia virus integration 1                                              | NM_002017    |
| PPP1CB   | protein phosphatase 1, catalytic subunit, beta isozyme                           | NM_002709    |
| EIF5     | eukaryotic translation initiation factor 5                                       | NM_001969    |
| ETV4     | ets variant 4                                                                    | NM_001079675 |
| IRF2BP2  | interferon regulatory factor 2 binding protein 2                                 | NM_182972    |
| ARHGAP28 | Rho GTPase activating protein 28                                                 | NM_001010000 |
| ETS1     | v-ets erythroblastosis virus E26 oncogene homolog 1 (avian)                      | NM_005238    |
| BMPR2    | bone morphogenetic protein receptor, type II (serine/threonine kinase)           | NM_001204    |
| WNK1     | WNK lysine deficient protein kinase 1                                            | NM_001184985 |
| PTEN     | phosphatase and tensin homolog                                                   | NM_000314    |
| NR1D2    | nuclear receptor subfamily 1, group D, member 2                                  | NM_005126    |
| HSPA5    | heat shock 70kDa protein 5 (glucose-regulated protein, 78kDa)                    | NM_005347    |
| ARHGAP18 | Rho GTPase activating protein 18                                                 | NM_033515    |
| ZNF367   | zinc finger protein 367                                                          | NM_153695    |
| ARID5B   | AT rich interactive domain 5B (MRF1-like)                                        | NM_032199    |
| TAF1     | TAF1 RNA polymerase II, TATA box binding protein (TBP)-associated factor, 250kDa | NM_004606    |
| CDC5L    | CDC5 cell division cycle 5-like (S. pombe)                                       | NM_001253    |
| SCAI     | suppressor of cancer cell invasion                                               | NM_173690    |
| ZIC1     | Zic family member 1                                                              | NM_003412    |

|          |                                                                                   |              |
|----------|-----------------------------------------------------------------------------------|--------------|
| PTPRK    | protein tyrosine phosphatase, receptor type, K                                    | NM_002844    |
| ZNF673   | zinc finger family member 673                                                     | AK097159     |
| CLK1     | CDC-like kinase 1                                                                 | NM_001162407 |
| TFPI     | tissue factor pathway inhibitor (lipoprotein-associated coagulation inhibitor)    | NM_006287    |
| ANKRD62  | ankyrin repeat domain 62                                                          | XM_003118756 |
| NR3C1    | nuclear receptor subfamily 3, group C, member 1 (glucocorticoid receptor)         | NM_001018077 |
| JMY      | junction mediating and regulatory protein, p53 cofactor                           | NM_152405    |
| INSIG1   | insulin induced gene 1                                                            | NM_005542    |
| LIMD1    | LIM domains containing 1                                                          | NM_014240    |
| ARHGAP40 | Rho GTPase activating protein 40                                                  | NM_001164431 |
| CHTOP    | chromatin target of PRMT1                                                         | AK097870     |
| SETD7    | SET domain containing (lysine methyltransferase) 7                                | BC066361     |
| PRKAA1   | protein kinase, AMP-activated, alpha 1 catalytic subunit                          | NM_206907    |
| NCBP1    | nuclear cap binding protein subunit 1, 80kDa                                      |              |
| NCK2     | NCK adaptor protein 2                                                             | NM_003581    |
| ATF1     | activating transcription factor 1                                                 | NM_005171    |
| GCG      | glucagon                                                                          | NM_002054    |
| NR2C1    | nuclear receptor subfamily 2, group C, member 1                                   | NM_001032287 |
| PTPRJ    | protein tyrosine phosphatase, receptor type, J                                    | NM_001098503 |
| SUMO1    | SMT3 suppressor of mif two 3 homolog 1 (S. cerevisiae)                            | NM_003352    |
| POLR2F   | polymerase (RNA) II (DNA directed) polypeptide F                                  |              |
| MAMSTR   | MEF2 activating motif and SAP domain containing transcriptional regulator         | NM_182574    |
| CBX1     | chromobox homolog 1                                                               | NM_006807    |
| WNT5A    | wingless-type MMTV integration site family, member 5A                             | NM_003392    |
| MEF2A    | myocyte enhancer factor 2A                                                        | NM_001171894 |
| SP4      | Sp4 transcription factor                                                          | NM_003112    |
| ARGLU1   | arginine and glutamate rich 1                                                     | AK304751     |
| RBM3     | RNA binding motif (RNP1, RRM) protein 3                                           | NM_006743    |
| GPX1     | glutathione peroxidase 1                                                          | NM_201397    |
| TAF4B    | TAF4b RNA polymerase II, TATA box binding protein (TBP)-associated factor, 105kDa | NM_005640    |
| RASGEF1B | RasGEF domain family, member 1B                                                   | NM_152545    |
| LCN1     | lipocalin 1                                                                       | NM_002297    |
| UHRF1    | ubiquitin-like with PHD and ring finger domains 1                                 | NM_013282    |
| WNT4     | wingless-type MMTV integration site family, member 4                              | NM_030761    |
| DIXDC1   | DIX domain containing 1                                                           | NM_001037954 |
| HLF      | hepatic leukemia factor                                                           | NM_002126    |
| EIF2S1   | eukaryotic translation initiation factor 2, subunit 1 alpha, 35kDa                | NM_004094    |
| TMF1     | TATA element modulatory factor 1                                                  | NM_007114    |
| ATXN1    | ataxin 1                                                                          | NM_000332    |
| FZD6     | frizzled family receptor 6                                                        | NM_003506    |
| SERPING1 | serpin peptidase inhibitor, clade G (C1 inhibitor), member 1                      |              |
| ZNF235   | zinc finger protein 235                                                           | NM_004234    |
| SUV420H1 | suppressor of variegation 4-20 homolog 1 (Drosophila)                             | NM_017635    |
| ZBTB8A   | zinc finger and BTB domain containing 8A                                          | NM_001040441 |
| A2ML1    | alpha-2-macroglobulin-like 1                                                      |              |
| NR3C1    | nuclear receptor subfamily 3, group C, member 1 (glucocorticoid receptor)         | NM_144670    |
|          |                                                                                   | NM_001018077 |
| TRAT1    | T cell receptor associated transmembrane adaptor 1                                | NM_016388    |
| C1S      | complement component 1, s subcomponent                                            | NM_001734    |
| BCL2     | B-cell CLL/lymphoma 2                                                             | NM_000633    |
| ITPKB    | inositol-trisphosphate 3-kinase B                                                 | NM_002221    |
| CLEC7A   | C-type lectin domain family 7, member A                                           | NM_197947    |
| PIK3R1   | phosphoinositide-3-kinase, regulatory subunit 1 (alpha)                           | NM_181523    |
| CX3CL1   | chemokine (C-X3-C motif) ligand 1                                                 | NM_002996    |
| PVR      | poliovirus receptor                                                               | NM_006505    |
| PTEN     | phosphatase and tensin homolog                                                    | NM_000314    |
| NCK2     | NCK adaptor protein 2                                                             | NM_003581    |
| ATF1     | activating transcription factor 1                                                 | NM_005171    |

|                                          |                                                       |                                                                        |              |
|------------------------------------------|-------------------------------------------------------|------------------------------------------------------------------------|--------------|
| Positive regu                            | WNT5A                                                 | wingless-type MMTV integration site family, member 5A                  | NM_003392    |
|                                          | MEF2A                                                 | myocyte enhancer factor 2A                                             | NM_001171894 |
|                                          | KRT1                                                  | keratin 1                                                              | NM_006121    |
|                                          | VNN1                                                  | vanin 1                                                                | NM_004666    |
|                                          | SERPING1                                              | serpin peptidase inhibitor, clade G (C1 inhibitor), member 1           |              |
|                                          | CXCL12                                                | chemokine (C-X-C motif) ligand 12                                      | NM_001033886 |
| Cell surface receptor signalling pathway | ATP6V1E1                                              | ATPase, H+ transporting, lysosomal 31kDa, V1 subunit E1                | NM_001696    |
|                                          | AGTR1                                                 | angiotensin II receptor, type 1                                        | NM_031850    |
|                                          | SHOC2                                                 | soc-2 suppressor of clear homolog (C. elegans)                         | NM_007373    |
|                                          | TRAT1                                                 | T cell receptor associated transmembrane adaptor 1                     | NM_016388    |
|                                          | FGF1                                                  | fibroblast growth factor 1 (acidic)                                    | NM_000800    |
|                                          | ATP6V0E1                                              | ATPase, H+ transporting, lysosomal 9kDa, V0 subunit e1                 | NM_003945    |
|                                          | EGR1                                                  | early growth response 1                                                | NM_001964    |
|                                          | LPAR6                                                 | lysophosphatidic acid receptor 6                                       | NM_005767    |
|                                          | CTNBN1                                                | catenin (cadherin-associated protein), beta 1, 88kDa                   | NM_001904    |
|                                          | STC1                                                  | stanniocalcin 1                                                        | NM_003155    |
|                                          | HCAR2                                                 | hydroxycarboxylic acid receptor 2                                      | NM_177551    |
|                                          | TAS2R50                                               | taste receptor, type 2, member 50                                      | NM_176890    |
|                                          | ERBB3                                                 | erb-b2 receptor tyrosine kinase 3                                      | NM_001982    |
|                                          | ITPKB                                                 | inositol-trisphosphate 3-kinase B                                      | NM_002221    |
|                                          | HRH4                                                  | histamine receptor H4                                                  | NM_021624    |
|                                          | DACT1                                                 | dishevelled-binding antagonist of beta-catenin 1                       | NM_016651    |
|                                          | NPPA                                                  | natriuretic peptide A                                                  | NM_006172    |
|                                          | ADORA1                                                | adenosine A1 receptor                                                  | NM_000674    |
|                                          | ANXA1                                                 | annexin A1                                                             | NM_000700    |
|                                          | PIK3R1                                                | phosphoinositide-3-kinase, regulatory subunit 1 (alpha)                | NM_181523    |
|                                          | XPR1                                                  | xenotropic and polytropic retrovirus receptor 1                        | NM_004736    |
|                                          | CX3CL1                                                | chemokine (C-X3-C motif) ligand 1                                      | AB209037     |
|                                          | BMPR2                                                 | bone morphogenetic protein receptor, type II (serine/threonine kinase) | NM_001204    |
|                                          | PTEN                                                  | phosphatase and tensin homolog                                         | NM_000314    |
|                                          | TGM2                                                  | transglutaminase 2                                                     | NM_198951    |
|                                          | ARID5B                                                | AT rich interactive domain 5B (MRF1-like)                              | NM_032199    |
|                                          | CLEC2D                                                | C-type lectin domain family 2, member D                                | NM_001004419 |
|                                          | PTPRK                                                 | protein tyrosine phosphatase, receptor type, K                         | NM_002844    |
|                                          | TXNDC17                                               | thioredoxin domain containing 17                                       | NM_032731    |
|                                          | EPHB4                                                 | EPH receptor B4                                                        | NM_004444    |
|                                          | GPR78                                                 | G protein-coupled receptor 78                                          | NM_080819    |
|                                          | PRKAA1                                                | protein kinase, AMP-activated, alpha 1 catalytic subunit               | NM_206907    |
|                                          | NCK2                                                  | NCK adaptor protein 2                                                  | NM_003581    |
|                                          | ATF1                                                  | activating transcription factor 1                                      | NM_005171    |
|                                          | GCG                                                   | glucagon                                                               | NM_002054    |
|                                          | PTPRJ                                                 | protein tyrosine phosphatase, receptor type, J                         | NM_001098503 |
| SUMO1                                    | small ubiquitin-like modifier 1                       | NM_003352                                                              |              |
| WNT5A                                    | wingless-type MMTV integration site family, member 5A | NM_003392                                                              |              |
| MEF2A                                    | myocyte enhancer factor 2A                            | NM_001171894                                                           |              |
| OR5AN1                                   | olfactory receptor, family 5, subfamily AN, member 1  | NM_001004729                                                           |              |
| STAP1                                    | signal transducing adaptor family member 1            | NM_012108                                                              |              |
| EPHB2                                    | EPH receptor B2                                       | NM_004442                                                              |              |
| WNT4                                     | wingless-type MMTV integration site family, member 4  | NM_030761                                                              |              |
| DIXDC1                                   | DIX domain containing 1                               | NM_001037954                                                           |              |
| FZD6                                     | frizzled class receptor 6                             | NM_003506                                                              |              |
| MRGPRX2                                  | MAS-related GPR, member X2                            | BC063450                                                               |              |
| OR4D1                                    | olfactory receptor, family 4, subfamily D, member 1   | NM_012374                                                              |              |
| OR51E1                                   | olfactory receptor, family 51, subfamily E, member 1  | NM_152430                                                              |              |
| CXCL12                                   | chemokine (C-X-C motif) ligand 12                     | NM_001033886                                                           |              |
| ess                                      | USP1                                                  | ubiquitin specific peptidase 1                                         | NM_003368    |

## Cellular protein modification process

|              |                                                                                  |              |
|--------------|----------------------------------------------------------------------------------|--------------|
| SRPK3        | SRSF protein kinase 3                                                            | NM_014370    |
| MSL2         | male-specific lethal 2 homolog (Drosophila)                                      | NM_018133    |
| CBLL1        | Cbl proto-oncogene-like 1, E3 ubiquitin protein ligase                           | NM_024814    |
| TRIP12       | thyroid hormone receptor interactor 12                                           | NM_004238    |
| FEM1B        | fem-1 homolog b (C. elegans)                                                     | NM_015322    |
| BRD1         | bromodomain containing 1                                                         | NM_014577    |
| PGM3         | phosphoglucomutase 3                                                             | NM_015599    |
| FGF1         | fibroblast growth factor 1 (acidic)                                              | NM_000800    |
| HACE1        | HECT domain and ankyrin repeat containing E3 ubiquitin protein ligase 1          | NM_020771    |
| MORC3        | MORC family CW-type zinc finger 3                                                | NM_015358    |
| ERBB3        | erb-b2 receptor tyrosine kinase 3                                                | NM_001982    |
| BCL2         | B-cell CLL/lymphoma 2                                                            | NM_000633    |
| PPP6C        | protein phosphatase 6, catalytic subunit                                         | NM_002721    |
| TGM4         | transglutaminase 4                                                               | NM_003241    |
| CCL11        | chemokine (C-C motif) ligand 11                                                  | NM_002986    |
| YEATS4       | YEATS domain containing 4                                                        | NM_006530    |
| ANXA1        | annexin A1                                                                       | NM_000700    |
| METAP2       | methionyl aminopeptidase 2                                                       | NM_006838    |
| UBE3A        | ubiquitin protein ligase E3A                                                     | NM_130839    |
| MEAF6        | MYST/Esa1-associated factor 6                                                    | NM_022756    |
| KNDC1        | kinase non-catalytic C-lobe domain (KIND) containing 1                           | NM_152643    |
| PPP1CB       | protein phosphatase 1, catalytic subunit, beta isozyme                           | NM_002709    |
| PGGT1B       | protein geranylgeranyltransferase type I, beta subunit                           | NM_005023    |
| STK17B       | serine/threonine kinase 17b                                                      | NM_004226    |
| BMPR2        | bone morphogenetic protein receptor, type II (serine/threonine kinase)           | NM_001204    |
| WNK1         | WNK lysine deficient protein kinase 1                                            | NM_001184985 |
| PTEN         | phosphatase and tensin homolog                                                   | NM_000314    |
| TGM2         | transglutaminase 2                                                               | NM_198951    |
| TAF1         | TAF1 RNA polymerase II, TATA box binding protein (TBP)-associated factor, 250kDa | NM_001286074 |
| RSRC1        | arginine/serine-rich coiled-coil 1                                               | NM_016625    |
| PTPRK        | protein tyrosine phosphatase, receptor type, K                                   | NM_002844    |
| CLK1         | CDC-like kinase 1                                                                | NM_001162407 |
| EPHB4        | EPH receptor B4                                                                  | NM_004444    |
| DNAJC6       | Dnaj (Hsp40) homolog, subfamily C, member 6                                      | NM_001256864 |
| ANAPC16      | anaphase promoting complex subunit 16                                            | NM_001242546 |
| FBXO24       | F-box protein 24                                                                 | NM_033506    |
| SETD7        | SET domain containing (lysine methyltransferase) 7                               | BC066361     |
| PRKAA1       | protein kinase, AMP-activated, alpha 1 catalytic subunit                         | NM_206907    |
| ZDHHC2       | zinc finger, DHHC-type containing 2                                              | NM_016353    |
| GCNT1        | glucosaminyl (N-acetyl) transferase 1, core 2                                    | NM_001097634 |
| DCAF16       | DDB1 and CUL4 associated factor 16                                               | NM_017741    |
| PTPRJ        | protein tyrosine phosphatase, receptor type, J                                   | NM_001098503 |
| SUMO1        | small ubiquitin-like modifier 1                                                  | NM_003352    |
| lnc-POLR2F-1 | lnc-POLR2F-1:1                                                                   |              |
| TRIOBP       | TRIO and F-actin binding protein                                                 | NM_138632    |
| BMP2K        | BMP2 inducible kinase                                                            | NM_017593    |
| MYO3A        | myosin IIIA                                                                      | BC036079     |
| GPX1         | glutathione peroxidase 1                                                         | NM_201397    |
| EPHB2        | EPH receptor B2                                                                  | NM_004442    |
| STK17B       | serine/threonine kinase 17b                                                      | BC052561     |
| SENP6        | SUMO1/sentrin specific peptidase 6                                               | NM_015571    |
| WNT4         | wingless-type MMTV integration site family, member 4                             | NM_030761    |
| EIF2S1       | eukaryotic translation initiation factor 2, subunit 1 alpha, 35kDa               | NM_004094    |
| F13A1        | coagulation factor XIII, A1 polypeptide                                          | NM_000129    |
| SUV420H1     | suppressor of variegation 4-20 homolog 1 (Drosophila)                            | NM_001300907 |
| BCL2         | B-cell CLL/lymphoma 2                                                            | NM_000633    |
| EGR2         | early growth response 2                                                          | NM_000399    |

## element

## Brain develop

|         |                                                                           |              |
|---------|---------------------------------------------------------------------------|--------------|
| DCT     | dopachrome tautomerase                                                    | NM_001922    |
| OTP     | orthopedia homeobox                                                       | NM_032109    |
| TWSG1   | twisted gastrulation BMP signaling modulator 1                            | NM_020648    |
| UBE3A   | ubiquitin protein ligase E3A                                              | NM_130839    |
| KNDC1   | kinase non-catalytic C-lobe domain (KIND) containing 1                    | NM_152643    |
| HMGCS1  | 3-hydroxy-3-methylglutaryl-CoA synthase 1 (soluble)                       | NM_002130    |
| ETS1    | v-ets avian erythroblastosis virus E26 oncogene homolog 1                 | NM_005238    |
| BMPR2   | bone morphogenetic protein receptor, type II (serine/threonine kinase)    | NM_001204    |
| HSPA5   | heat shock 70kDa protein 5 (glucose-regulated protein, 78kDa)             | NM_005347    |
| ZIC1    | Zic family member 1                                                       | NM_003412    |
| NR3C1   | nuclear receptor subfamily 3, group C, member 1 (glucocorticoid receptor) | NM_001018077 |
| WNT5A   | wingless-type MMTV integration site family, member 5A                     | NM_003392    |
| CNTNAP2 | contactin associated protein-like 2                                       | NM_014141    |
| EPHB2   | EPH receptor B2                                                           | NM_004442    |
| WNT4    | wingless-type MMTV integration site family, member 4                      | NM_030761    |
| DIXDC1  | DIX domain containing 1                                                   | NM_001037954 |
| FZD6    | frizzled class receptor 6                                                 | NM_003506    |
| CXCL12  | chemokine (C-X-C motif) ligand 12                                         | NM_001033886 |
| NR3C1   | nuclear receptor subfamily 3, group C, member 1 (glucocorticoid receptor) | NM_001018077 |

## Cellular nitrogen compound metabolic process

|           |                                                                              |              |
|-----------|------------------------------------------------------------------------------|--------------|
| USP1      | ubiquitin specific peptidase 1                                               | NM_003368    |
| VNN2      | vanin 2                                                                      | NM_004665    |
| RPIA      | ribose 5-phosphate isomerase A                                               | NM_144563    |
| TCEA1     | transcription elongation factor A (SII), 1                                   | NM_006756    |
| ATP6V1E1  | ATPase, H+ transporting, lysosomal 31kDa, V1 subunit E1                      | NM_001696    |
| DDX24     | DEAD (Asp-Glu-Ala-Asp) box helicase 24                                       | NM_020414    |
| SSB       | Sjogren syndrome antigen B (autoantigen La)                                  | NM_003142    |
| TAF1B     | TATA box binding protein (TBP)-associated factor, RNA polymerase I, B, 63kDa | NM_005680    |
| PGM3      | phosphoglucomutase 3                                                         | NM_015599    |
| ZNF217    | zinc finger protein 217                                                      | NM_006526    |
| HNRNPDL   | heterogeneous nuclear ribonucleoprotein D-like                               | NM_031372    |
| ATP6V0E1  | ATPase, H+ transporting, lysosomal 9kDa, V0 subunit e1                       | NM_003945    |
| EGR1      | early growth response 1                                                      | NM_001964    |
| POU2AF1   | POU class 2 associating factor 1                                             | NM_006235    |
| TEFM      | transcription elongation factor, mitochondrial                               | NM_024683    |
| AK9       | adenylate kinase 9                                                           | NM_145025    |
| DNM3      | dynamain 3                                                                   | NM_015569    |
| ABCC13    | ATP-binding cassette, sub-family C (CFTR/MRP), member 13, pseudogene         | NR_003088    |
| E2F2      | E2F transcription factor 2                                                   | NM_004091    |
| EGR2      | early growth response 2                                                      | NM_000399    |
| NAP1L1    | nucleosome assembly protein 1-like 1                                         | NM_139207    |
| SPTA1     | spectrin, alpha, erythrocytic 1                                              | NM_003126    |
| TRUB1     | TruB pseudouridine (psi) synthase family member 1                            | NM_139169    |
| NPPA      | natriuretic peptide A                                                        | NM_006172    |
| TSPYL6    | TSPY-like 6                                                                  | NM_001003937 |
| NT5C1A    | 5'-nucleotidase, cytosolic IA                                                | NM_032526    |
| MYH7      | myosin, heavy chain 7, cardiac muscle, beta                                  | NM_000257    |
| HNRNPH1   | heterogeneous nuclear ribonucleoprotein H1 (H)                               | NM_005520    |
| HNRNPH3   | heterogeneous nuclear ribonucleoprotein H3 (2H9)                             | NM_012207    |
| AMD1      | adenosylmethionine decarboxylase 1                                           | NM_001634    |
| HNRNPA2B1 | heterogeneous nuclear ribonucleoprotein A2/B1                                | NM_002137    |
| EIF5      | eukaryotic translation initiation factor 5                                   | NM_001969    |
| QRSL1     | glutaminyl-tRNA synthase (glutamine-hydrolyzing)-like 1                      | NM_018292    |
| ETS1      | v-ets avian erythroblastosis virus E26 oncogene homolog 1                    | NM_005238    |
| BMPR2     | bone morphogenetic protein receptor, type II (serine/threonine kinase)       | NM_001204    |
| SRSF1     | serine/arginine-rich splicing factor 1                                       | NM_001078166 |
| BCAT1     | branched chain amino-acid transaminase 1, cytosolic                          | NM_005504    |
| NR1D2     | nuclear receptor subfamily 1, group D, member 2                              | NM_005126    |

## Cellular response to stress

|              |                                                                                   |              |
|--------------|-----------------------------------------------------------------------------------|--------------|
| HSPA5        | heat shock 70kDa protein 5 (glucose-regulated protein, 78kDa)                     | NM_005347    |
| SRSF8        | serine/arginine-rich splicing factor 8                                            | NM_032102    |
| TAF1         | TAF1 RNA polymerase II, TATA box binding protein (TBP)-associated factor, 250kDa  | NM_001286074 |
| RSRC1        | arginine/serine-rich coiled-coil 1                                                | NM_016625    |
| CDC5L        | cell division cycle 5-like                                                        | NM_001253    |
| PANK3        | pantothenate kinase 3                                                             | BX648891     |
| FECH         | ferrochelatase                                                                    | NM_001012515 |
| NR3C1        | nuclear receptor subfamily 3, group C, member 1 (glucocorticoid receptor)         | NM_001018077 |
| JMY          | junction mediating and regulatory protein, p53 cofactor                           | NM_152405    |
| ZC3H12B      | zinc finger CCCH-type containing 12B                                              | NM_001010888 |
| HIST2H2BF    | histone cluster 2, H2bf                                                           | NM_001024599 |
| DDX21        | DEAD (Asp-Glu-Ala-Asp) box helicase 21                                            | NM_001256910 |
| ATF1         | activating transcription factor 1                                                 | NM_005171    |
| GEMIN2       | gem (nuclear organelle) associated protein 2                                      | NM_003616    |
| SUMO1        | small ubiquitin-like modifier 1                                                   | NM_003352    |
| lnc-POLR2F-1 | lnc-POLR2F-1:1                                                                    |              |
| MAMSTR       | MEF2 activating motif and SAP domain containing transcriptional regulator         | NM_182574    |
| APOBEC4      | apolipoprotein B mRNA editing enzyme, catalytic polypeptide-like 4 (putative)     | NM_203454    |
| PPCS         | phosphopantothenoylcysteine synthetase                                            | NM_001287507 |
| MEF2A        | myocyte enhancer factor 2A                                                        | NM_001171894 |
| RBM3         | RNA binding motif (RNP1, RRM) protein 3                                           | NM_006743    |
| MYO3A        | myosin IIIA                                                                       | BC036079     |
| GPX1         | glutathione peroxidase 1                                                          | NM_201397    |
| TAF4B        | TAF4b RNA polymerase II, TATA box binding protein (TBP)-associated factor, 105kDa | NM_001293725 |
| MMAB         | methylmalonic aciduria (cobalamin deficiency) cblB type                           | NM_052845    |
| UHRF1        | ubiquitin-like with PHD and ring finger domains 1                                 | NM_001290050 |
| UGDH         | UDP-glucose 6-dehydrogenase                                                       | NM_003359    |
| VNN1         | vanin 1                                                                           | NM_004666    |
| HLF          | hepatic leukemia factor                                                           | NM_002126    |
| TMF1         | TATA element modulatory factor 1                                                  | NM_007114    |
| ATXN1        | ataxin 1                                                                          | NM_000332    |
| TUBBP5       | tubulin, beta pseudogene 5                                                        | NR_027156    |
| NR3C1        | nuclear receptor subfamily 3, group C, member 1 (glucocorticoid receptor)         | NM_001018077 |
| USP1         | ubiquitin specific peptidase 1                                                    | NM_003368    |
| TCEA1        | transcription elongation factor A (SII), 1                                        | NM_006756    |
| CTSV         | cathepsin V                                                                       | NM_001333    |
| FGF1         | fibroblast growth factor 1 (acidic)                                               | NM_000800    |
| SNCA         | synuclein, alpha (non A4 component of amyloid precursor)                          | NM_007308    |
| STC1         | stanniocalcin 1                                                                   | NM_003155    |
| ARPP21       | cAMP-regulated phosphoprotein, 21kDa                                              | NM_016300    |
| BCL2         | B-cell CLL/lymphoma 2                                                             | NM_000633    |
| SPATA18      | spermatogenesis associated 18                                                     | NM_145263    |
| SLC52A3      | solute carrier family 52 (riboflavin transporter), member 3                       | NM_033409    |
| PRDX3        | peroxiredoxin 3                                                                   | NM_006793    |
| ANXA1        | annexin A1                                                                        | NM_000700    |
| ETS1         | v-ets avian erythroblastosis virus E26 oncogene homolog 1                         | NM_005238    |
| BMPR2        | bone morphogenetic protein receptor, type II (serine/threonine kinase)            | NM_001204    |
| HSPA5        | heat shock 70kDa protein 5 (glucose-regulated protein, 78kDa)                     | NM_005347    |
| TAF1         | TAF1 RNA polymerase II, TATA box binding protein (TBP)-associated factor, 250kDa  | NM_001286074 |
| PTPRK        | protein tyrosine phosphatase, receptor type, K                                    | NM_002844    |
| JMY          | junction mediating and regulatory protein, p53 cofactor                           | NM_152405    |
| INSIG1       | insulin induced gene 1                                                            | NM_005542    |
| PRKAA1       | protein kinase, AMP-activated, alpha 1 catalytic subunit                          | NM_206907    |
| ATF1         | activating transcription factor 1                                                 | NM_005171    |
| SUMO1        | small ubiquitin-like modifier 1                                                   | NM_003352    |
| lnc-POLR2F-1 | lnc-POLR2F-1:1                                                                    |              |
| WNT5A        | wingless-type MMTV integration site family, member 5A                             | NM_003392    |

|        |                                                                    |              |
|--------|--------------------------------------------------------------------|--------------|
| MEF2A  | myocyte enhancer factor 2A                                         | NM_001171894 |
| GPX1   | glutathione peroxidase 1                                           | NM_201397    |
| UHRF1  | ubiquitin-like with PHD and ring finger domains 1                  | NM_001290050 |
| WNT4   | wingless-type MMTV integration site family, member 4               | NM_030761    |
| EIF2S1 | eukaryotic translation initiation factor 2, subunit 1 alpha, 35kDa | NM_004094    |
