# Supplementary material for: Transcriptional signature associated with early rheumatoid arthritis and healthy individuals at high risk to develop the disease
Source: PubMed Central journal article supplement (PMC5870959; doi:10.1371/journal.pone.0194205), 2018-03-27
Supplement: pone.0194205.s012.pdf [file pone.0194205.s012.pdf]

**Supplementary table 12.** Specific induced pathways in relatives with ACCP+ compared to relatives ACCP-

| Pathway                                                                        | p-value    | Matched Entities | Pathway Entities of Experiment Type |
|--------------------------------------------------------------------------------|------------|------------------|-------------------------------------|
| Hs_MHC_class_II_antigen_presentation_WP2679_76872                              | 3.03E-05   | 10               | 90                                  |
| Hs_Costimulation_by_the_CD28_family_WP1799_77064                               | 4.11E-05   | 8                | 71                                  |
| Hs_Interferon_gamma_signaling_WP1836_77096                                     | 1.28E-04   | 6                | 43                                  |
| Hs_Fatty_Acid_Beta_Oxidation_WP143_71172                                       | 2.18E-04   | 6                | 34                                  |
| Hs_TFs_Regulate_miRNAs_related_to_cardiac_hypertrophy_WP1559_68890             | 8.88E-04   | 3                | 15                                  |
| Hs_Effects_of_Nitric_Oxide_WP1995_69910                                        | 0.00640001 | 2                | 8                                   |
| Hs_Neural_Crest_Differentiation_WP2064_68974                                   | 0.0094352  | 2                | 101                                 |
| Hs_Acetylcholine_Synthesis_WP528_76269                                         | 0.01298301 | 2                | 7                                   |
| Hs_Trafficking_and_processing_of_endosomal_TLR_WP2709_76922                    | 0.0170148  | 2                | 8                                   |
| Hs_Triacylglyceride_Synthesis_WP325_71223                                      | 0.02356568 | 3                | 24                                  |
| Hs_Endothelin_Pathways_WP2197_74852                                            | 0.02598208 | 1                | 33                                  |
| Hs_Amino_acid_conjugation_of_benzoic_acid_WP521_63156                          | 0.02598208 | 1                | 4                                   |
| Hs_Nanoparticle_triggered_regulated_necrosis_WP2513_74182                      | 0.02598208 | 1                | 11                                  |
| Hs_alpha-linolenic_(omega3)_and_linoleic_(omega6)_acid_metabolism_WP2724_76941 | 0.02642153 | 2                | 11                                  |
| Hs_AGE-RAGE_pathway_WP2324_71701                                               | 0.02848138 | 5                | 66                                  |
| Hs_Activation_of_Chaperone_Genes_by_XBP1(S)_WP2667_76852                       | 0.029068   | 4                | 46                                  |
| Hs_mRNA_Capping_WP1861_76815                                                   | 0.03535084 | 3                | 28                                  |
| Hs_Fatty_acid,_triacylglycerol,_and_ketone_body_metabolism_WP1817_77087        | 0.03814839 | 4                | 49                                  |
| Hs_Generic_Transcription_Pathway_WP1822_77033                                  | 0.04218413 | 3                | 30                                  |
