# Supplementary material for: Transcriptional signature associated with early rheumatoid arthritis and healthy individuals at high risk to develop the disease
Source: PubMed Central journal article supplement (PMC5870959; doi:10.1371/journal.pone.0194205), 2018-03-27
Supplement: pone.0194205.s013.pdf [file pone.0194205.s013.pdf]

**Supplementary table 13.** Induced pathways in preclinical and clinical AR represented by relatives with ACCP+ and AR patients compared to relatives ACCP-

| Pathway                                                                          | Relatives ACCP+  |                                     |            | RA patients      |                                     |            |
|----------------------------------------------------------------------------------|------------------|-------------------------------------|------------|------------------|-------------------------------------|------------|
|                                                                                  | Matched Entities | Pathway Entities of Experiment Type | p-value    | Matched Entities | Pathway Entities of Experiment Type | p-value    |
| Hs_Complement_and_Coagulation_Cascades_WP558_67786                               | 2                | 64                                  | 0.3743229  | 6                | 64                                  | 1.40E-04   |
| Hs_BDNF_signaling_pathway_WP2380_71549                                           | 5                | 141                                 | 0.29964626 | 8                | 141                                 | 0.00188149 |
| Hs_Wnt_Signaling_Pathway_WP428_71365                                             | 4                | 61                                  | 0.07054249 | 5                | 61                                  | 0.00267845 |
| Hs_Androgen_receptor_signaling_pathway_WP138_72130                               | 4                | 88                                  | 0.19576426 | 6                | 88                                  | 0.00286521 |
| Hs_Serotonin_Receptor_4-6-7_and_NR3C_Signaling_WP734_74438                       | 1                | 19                                  | 0.3936679  | 3                | 19                                  | 0.00322424 |
| AndrogenReceptor                                                                 | 3                | 94                                  | 0.44297302 | 6                | 94                                  | 0.00397564 |
| Wnt                                                                              | 5                | 104                                 | 0.13066246 | 6                | 104                                 | 0.00619828 |
| Hs_DNA_Damage_Response_(only_ATM_dependent)_WP710_70109                          | 6                | 97                                  | 0.00146364 | 4                | 97                                  | 0.00713114 |
| Hs_Formation_of_Fibrin_Clot_(Clotting_Cascade)_WP1818_76965                      | 1                | 30                                  | 0.546213   | 3                | 30                                  | 0.01187087 |
| Hs_Integrated_Cancer_pathway_WP1971_71249                                        | 1                | 36                                  | 0.58070517 | 3                | 36                                  | 0.01540314 |
| Hs_Wnt_Signaling_Pathway_and_Pluripotency_WP399_74897                            | 5                | 100                                 | 0.09829516 | 5                | 100                                 | 0.01738259 |
| TGFBR                                                                            | 6                | 134                                 | 0.13350268 | 6                | 134                                 | 0.02004555 |
| Hs_PIP3_activates_AKT_signaling_WP2653_76821                                     | 2                | 91                                  | 0.54615563 | 4                | 91                                  | 0.02560972 |
| Hs_Interleukin-11_Signaling_Pathway_WP2332_71360                                 | 3                | 40                                  | 0.08510803 | 3                | 40                                  | 0.02571158 |
| Hs_Aryl_Hydrocarbon_Receptor_WP2586_76318                                        | 1                | 47                                  | 0.6513437  | 3                | 47                                  | 0.02571158 |
| Hs_Signaling_by_Insulin_receptor_WP1913_77046                                    | 5                | 75                                  | 0.0393615  | 4                | 75                                  | 0.02803931 |
| Hs_Prostate_Cancer_WP2263_73838                                                  | 4                | 116                                 | 0.30288115 | 5                | 116                                 | 0.02853272 |
| Hs_Integrated_Breast_Cancer_Pathway_WP1984_72732                                 | 7                | 164                                 | 0.02485127 | 5                | 164                                 | 0.03162374 |
| Hs_Translation_Factors_WP107_69767                                               | 2                | 50                                  | 0.35555542 | 3                | 50                                  | 0.04103661 |
| Hs_IL-3_Signaling_Pathway_WP286_72139                                            | 3                | 49                                  | 0.13441081 | 3                | 49                                  | 0.04321275 |
| Hs_MicroRNAs_in_cardiomyocyte_hypertrophy_WP1544_75258                           | 9                | 104                                 | 3.05E-04   | 4                | 104                                 | 0.04379221 |
| Hs_Translocation_of GLUT4_to_the_Plasma_Membrane_WP2777_77058                    | 4                | 51                                  | 0.04323081 | 3                | 51                                  | 0.04773436 |
| Hs_TCR_signaling_WP1927_76950                                                    | 8                | 74                                  | 8.31E-05   | 3                | 74                                  | 0.05744057 |
| Hs_Latent_infection_of_Homo_sapiens_with_Mycobacterium_tuberculosis_WP2700_76907 | 3                | 62                                  | 0.03869027 | 2                | 62                                  | 0.07760624 |

|                                                                                                                                     |    |     |            |   |     |            |
|-------------------------------------------------------------------------------------------------------------------------------------|----|-----|------------|---|-----|------------|
| Hs_TSH_signaling_pathway_WP2032_75384                                                                                               | 5  | 66  | 0.02848138 | 3 | 66  | 0.08840181 |
| Hs_Insulin_Signaling_WP481_72080                                                                                                    | 9  | 161 | 0.02437216 | 5 | 161 | 0.11346993 |
| Hs_EGF-EGFR_Signaling_Pathway_WP437_72106                                                                                           | 10 | 162 | 0.00964363 | 5 | 162 | 0.11567275 |
| Hs_Energy_Metabolism_WP1541_68947                                                                                                   | 5  | 47  | 0.00728563 | 2 | 47  | 0.17221336 |
| Hs_Corticotropin-releasing_hormone_WP2355_71393                                                                                     | 6  | 90  | 0.02993017 | 3 | 90  | 0.17352201 |
| IL9                                                                                                                                 | 2  | 12  | 0.03744847 | 1 | 12  | 0.17536251 |
| Hs_Cardiac_Hypertrophic_Response_WP2795_76316                                                                                       | 5  | 54  | 0.01295823 | 2 | 54  | 0.21266016 |
| Hs_Electron_Transport_Chain_WP111_71266                                                                                             | 10 | 104 | 3.56E-04   | 3 | 104 | 0.22649026 |
| Hs_Mitochondrial_LC-Fatty_Acid_Beta-Oxidation_WP368_71383                                                                           | 3  | 16  | 0.0076009  | 1 | 16  | 0.22670752 |
| Hs_Metabolism_of_nitric_oxide_WP1850_77097                                                                                          | 3  | 17  | 0.00905353 | 1 | 17  | 0.23903722 |
| Hs_Oxidative_phosphorylation_WP623_68894                                                                                            | 5  | 63  | 0.01972986 | 2 | 63  | 0.24797079 |
| Hs_Visual_phototransduction_WP2776_77056                                                                                            | 5  | 67  | 0.02687827 | 2 | 67  | 0.27754122 |
| Hs_G1_to_S_cell_cycle_control_WP45_71377                                                                                            | 5  | 68  | 0.03186591 | 2 | 68  | 0.29525807 |
| Hs_Parkin-Ubiquitin_Proteasomal_System_pathway_WP2359_72121                                                                         | 5  | 73  | 0.03364835 | 2 | 73  | 0.30115107 |
| Hs_Transcriptional_Regulation_of_White_Adipocyte_Differentiation_WP2751_76992                                                       | 5  | 74  | 0.04138897 | 2 | 74  | 0.3246263  |
| Hs_IL-7_Signaling_Pathway_WP205_70018                                                                                               | 3  | 27  | 0.02627396 | 1 | 27  | 0.33086675 |
| Hs_Gastric_cancer_network_1_WP2361_71382                                                                                            | 3  | 28  | 0.03535084 | 1 | 28  | 0.36237556 |
| Hs_Respiratory_electron_transport,_ATP_synthesis_by_chemiosmotic_coupling,_and_heat_production_by_uncoupling_proteins._WP1902_77091 | 11 | 94  | 3.32E-05   | 2 | 94  | 0.44309214 |
| Hs_Lipid_digestion,_mobilization,_and_transport_WP2764_77026                                                                        | 4  | 41  | 0.01514362 | 1 | 41  | 0.44829082 |
| Hs_Binding_and_Uptake_of_Ligands_by_Scavenger_Receptors_WP2784_77068                                                                | 6  | 195 | 0.00130905 | 1 | 195 | 0.5302673  |
| Hs_Glycolysis_and_Gluconeogenesis_WP534_74524                                                                                       | 4  | 49  | 0.03574297 | 1 | 49  | 0.5377641  |
| Hs_Nucleotide_Excision_Repair_WP1980_76859                                                                                          | 4  | 49  | 0.03814839 | 1 | 49  | 0.5451415  |
| Hs_Wnt_Signaling_Pathway_Netpath_WP363_70630                                                                                        | 4  | 51  | 0.04323081 | 1 | 51  | 0.55954564 |
| Hs_Focal_Adhesion_WP306_71714                                                                                                       | 11 | 188 | 0.00897285 | 3 | 188 | 0.56379765 |
| Hs_Asparagine_N-linked_glycosylation_WP1785_76985                                                                                   | 4  | 53  | 0.04867506 | 1 | 53  | 0.57349443 |
| Hs_Integrin-mediated_Cell_Adhesion_WP185_71391                                                                                      | 8  | 99  | 0.00431048 | 1 | 99  | 0.796657   |
| Hs_MAPK_Signaling_Pathway_WP382_72103                                                                                               | 13 | 168 | 4.73E-04   | 1 | 168 | 0.9331941  |
